# Supplementary material for: Copper-catalyzed formal [4 + 1] annulation ofN-propargyl ynamides with diketones
Source: Royal Society of Chemistry journal article supplement (doi:10.1039/d2qo01786e), 2022-11-24

Supporting Information

**Copper-catalyzed formal [4 + 1] annulation of *N*-propargyl ynamides with diketones**

Hao-Jin Xu,<sup>a</sup> Cui-Ting Li,<sup>a</sup> Can-Ming Chen,<sup>a</sup> Jie Chen,<sup>a</sup> Xin-Qi Zhu,<sup>\*,a</sup> Bo Zhou<sup>a</sup> and  
Long-Wu Ye<sup>\*,a,b</sup>

<sup>a</sup>*Key Laboratory for Chemical Biology of Fujian Province and State Key Laboratory of Physical Chemistry of Solid Surfaces, College of Chemistry and Chemical Engineering, Xiamen University, Xiamen 361005, China*

<sup>b</sup>*State Key Laboratory of Organometallic Chemistry, Shanghai Institute of Organic Chemistry, Chinese Academy of Sciences, Shanghai 200032, China*

E-mails: [longwuye@xmu.edu.cn](mailto:longwuye@xmu.edu.cn); [xinqizhu@xmu.edu.cn](mailto:xinqizhu@xmu.edu.cn)

| Content                                                    | Page Number |
|------------------------------------------------------------|-------------|
| 1. General Information                                     | 2           |
| 2. General Procedures and Transformations                  | 3           |
| 3. References                                              | 42          |
| 4. Crystal Data and Structure Refinement for 3ab           | 43          |
| 5. HPLC Chromatograms                                      | 44          |
| 6. <sup>1</sup> H, <sup>13</sup> C and <sup>19</sup> F NMR | 46          |

**General Information.** Acetonitrile (ACS grade), toluene (ACS grade), ethyl acetate (ACS grade) and hexanes (ACS grade) were obtained commercially and used without further purification. Methylene chloride, tetrahydrofuran and diethyl ether were purified according to standard methods unless otherwise noted. Commercially available reagents were used without further purification. All reactions were carried out with a Titan HMS-14 digital magnetic stirrer with hot plate. Reactions were monitored by thin layer chromatography (TLC) using silicycle pre-coated silica gel plates. Flash column chromatography was performed over silica gel (300-400 mesh). Infrared spectra were recorded on a Nicolet AVATER FTIR330 spectrometer as thin film and are reported in reciprocal centimeter ( $\text{cm}^{-1}$ ). Mass spectra were recorded with Agilent 6230 ESI-TOF MS using electron spray ionization. X-ray diffraction analysis was recorded on a Rigaku AFC7R X-ray single crystal diffractometer. HPLC analyses were carried out in a chromatograph equipped with a UV diode-array detector using chiral stationary columns from Daicel.

$^1\text{H}$  NMR spectra and  $^{13}\text{C}$  NMR spectra were recorded on a Bruker AV-400 spectrometer and a Bruker AV-500 spectrometer in chloroform- $\text{d}_3$ . Chemical shifts are reported in ppm with the internal TMS signal at 0.0 ppm as a standard for  $^1\text{H}$  NMR spectra and with the internal chloroform signal at 77.0 ppm as a standard for  $^{13}\text{C}$  NMR spectra. The data is being reported as (s = singlet, d = doublet, t = triplet, m = multiplet or unresolved, brs = broad singlet, coupling constant(s) in Hz, integration).

## 2. General Procedures and Transformations

### 2.1 Representative synthetic procedure for the preparation of ynamides **1** (**1a-1y**)<sup>1,2</sup>

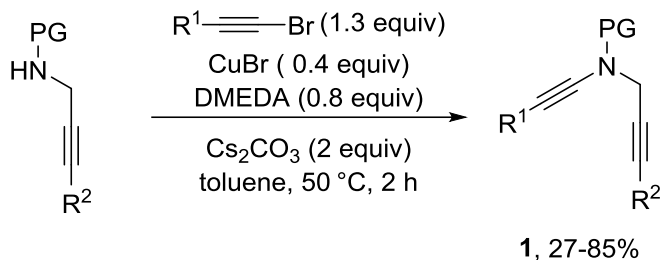

To a solution of the protected propargylamide derivative (1 mmol, 1 equiv) in toluene (0.1 M) was added copper bromide (0.4 mmol, 0.4 equiv), DMEDA (0.8 mmol, 0.8 equiv), Cs<sub>2</sub>CO<sub>3</sub> (2 mmol, 2 equiv), acetylene bromide derivative (1.3 mmol, 1.3 equiv). The reaction was stirred at 50 °C for about 2 h and the progress of the reaction was monitored by TLC. Upon completion, the solution was then filtered and concentrated under a reduced pressure. The residue was purified by silica gel column chromatography (PE:EA = 15:1). The characterization data of ynamides **1x** and **1z** have been reported in our previous work.<sup>1</sup>

#### *N*-((2,6-dimethylphenyl)ethynyl)-*N*-(3-phenylprop-2-yn-1-yl)methanesulfonamide (**1a**)

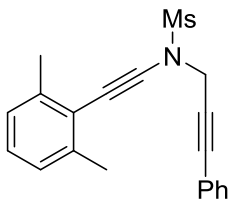

**1a**

Compound **1a** was prepared in 57% yield (192.3 mg) according to the general procedure. The substrate was isolated through silica gel column chromatography (PE:EA = 15:1) as a pale yellow solid (mp 64–65 °C). <sup>1</sup>H NMR (400 MHz, CDCl<sub>3</sub>) δ 7.46 – 7.40 (m, 2H), 7.40 – 7.28 (m, 3H), 7.13 – 7.07 (m, 1H), 7.06 – 7.01 (m, 2H), 4.64 (s, 2H), 3.27 (s, 3H), 2.44 (s, 6H); <sup>13</sup>C NMR (100 MHz, CDCl<sub>3</sub>) δ 139.9, 131.8, 129.1, 128.5, 127.6, 126.7, 122.0, 121.7, 89.4, 86.9, 81.5, 69.3, 43.1, 38.4, 21.1; IR (neat): 3020, 2927, 2232, 1490,

1363, 1321, 1167, 1040, 788, 758  $\text{cm}^{-1}$ ; HRMS (ESI)  $m/z$ :  $[\text{M} + \text{Na}]^+$  Calcd for  $\text{C}_{20}\text{H}_{19}\text{NNaO}_2\text{S}$  360.1029; Found 360.1031.

***N*-((2,6-dimethylphenyl)ethynyl)-4-methyl-*N*-(3-phenylprop-2-yn-1-yl)benzenesulfonamide (1b)**

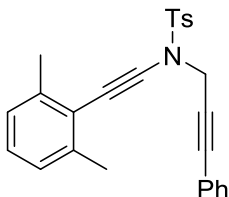

**1b**

Compound **1b** was prepared in 69% yield (285.3 mg) according to the general procedure. The substrate was isolated through silica gel column chromatography (PE:EA = 15:1) as a white solid (mp 121–123 °C).  $^1\text{H}$  NMR (400 MHz,  $\text{CDCl}_3$ )  $\delta$  7.91 (d,  $J$  = 8.4 Hz, 2H), 7.29 – 7.20 (m, 5H), 7.15 – 7.10 (m, 2H), 7.09 – 7.03 (m, 1H), 7.02 – 6.96 (m, 2H), 4.60 (s, 2H), 2.37 (s, 6H), 2.33 (s, 3H);  $^{13}\text{C}$  NMR (100 MHz,  $\text{CDCl}_3$ )  $\delta$  144.9, 139.9, 134.3, 131.6, 129.6, 128.6, 128.2, 128.1, 127.3, 126.5, 122.3, 121.9, 90.0, 86.3, 81.2, 68.9, 43.0, 21.5, 21.0; IR (neat): 3055, 2921, 2230, 1490, 1367, 1168, 1119, 1089, 757, 708  $\text{cm}^{-1}$ ; HRMS (ESI)  $m/z$ :  $[\text{M} + \text{Na}]^+$  Calcd for  $\text{C}_{26}\text{H}_{23}\text{NNaO}_2\text{S}$  436.1342; Found 436.1342.

***N*-((2,6-dimethylphenyl)ethynyl)-*N*-(3-phenylprop-2-yn-1-yl)propane-1-sulfonamide (1c)**

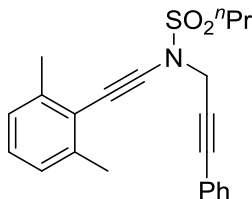

**1c**

Compound **1c** was prepared in 68% yield (248.5 mg) according to the general procedure. The substrate was isolated through silica gel column chromatography (PE:EA = 15:1) as a brown solid (mp 68–70 °C).  $^1\text{H}$  NMR (400 MHz,  $\text{CDCl}_3$ )  $\delta$  7.47 – 7.37 (m, 2H), 7.36 – 7.25 (m, 3H), 7.10 – 7.03 (m, 1H), 7.03 – 6.96 (m, 2H), 4.60 (s, 2H), 3.39 (t,  $J$  = 7.6 Hz, 2H), 2.43 (s, 6H), 2.10 – 1.95 (m, 2H), 1.05 (t,  $J$  = 7.6 Hz, 3H);  $^{13}\text{C}$  NMR (100 MHz,

CDCl<sub>3</sub>)  $\delta$  139.5, 131.6, 128.8, 128.3, 127.2, 126.5, 122.1, 121.7, 89.7, 86.4, 81.9, 68.9, 53.9, 42.5, 20.9, 16.9, 12.8; IR (neat): 3056, 2972, 2232, 1490, 1365, 1158, 1123, 1078, 757, 691 cm<sup>-1</sup>; HRMS (ESI) m/z: [M + Na]<sup>+</sup> Calcd for C<sub>22</sub>H<sub>23</sub>NNaO<sub>2</sub>S 388.1342; Found 388.1340.

***N*-((2,6-dimethylphenyl)ethynyl)-1-phenyl-*N*-(3-phenylprop-2-yn-1-yl)methanesulfonamide (1d)**

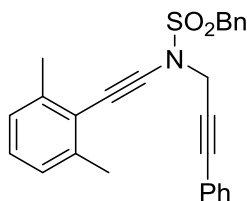

**1d**

Compound **1d** was prepared in 73% yield (301.9 mg) according to the general procedure. The substrate was isolated through silica gel column chromatography (PE:EA = 15:1) as a pale yellow solid (mp 90–92 °C). <sup>1</sup>H NMR (400 MHz, CDCl<sub>3</sub>)  $\delta$  7.52 – 7.45 (m, 2H), 7.44 – 7.39 (m, 2H), 7.38 – 7.26 (m, 6H), 7.10 – 7.05 (m, 1H), 7.04 – 6.99 (m, 2H), 4.61 (s, 2H), 4.34 (s, 2H), 2.43 (s, 6H); <sup>13</sup>C NMR (100 MHz, CDCl<sub>3</sub>)  $\delta$  139.5, 131.7, 130.9, 129.1, 128.8, 128.3, 127.3, 127.2, 126.6, 122.2, 121.8, 89.4, 86.5, 81.8, 69.8, 57.6, 43.2, 21.1; IR (neat): 3058, 2920, 2232, 1491, 1366, 1164, 1122, 1045, 757, 693 cm<sup>-1</sup>; HRMS (ESI) m/z: [M + Na]<sup>+</sup> Calcd for C<sub>26</sub>H<sub>23</sub>NNaO<sub>2</sub>S 436.1342; Found 436.1342.

***N*-((2,6-dimethylphenyl)ethynyl)-4-methoxy-*N*-(3-phenylprop-2-yn-1-yl)benzenesulfonamide (1e)**

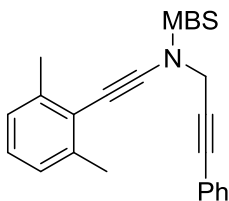

**1e**

Compound **1e** was prepared in 53% yield (227.7 mg) according to the general procedure. The substrate was isolated through silica gel column chromatography (PE:EA = 18:1) as a white solid (mp 122–124 °C). <sup>1</sup>H NMR (400 MHz, CDCl<sub>3</sub>)  $\delta$  7.96 (d, *J* = 8.8 Hz, 2H),

7.32 – 7.20 (m, 3H), 7.18 – 7.13 (m, 2H), 7.10 – 7.03 (m, 1H), 7.03 – 6.97 (m, 2H), 6.91 (d,  $J = 8.8$  Hz, 2H), 4.60 (s, 2H), 3.75 (s, 3H), 2.38 (s, 6H);  $^{13}\text{C}$  NMR (100 MHz,  $\text{CDCl}_3$ )  $\delta$  163.8, 139.9, 131.6, 130.4, 128.8, 128.6, 128.1, 127.2, 126.5, 122.4, 122.0, 114.1, 90.1, 86.3, 81.4, 68.9, 55.5, 43.0, 21.1; IR (neat): 3057, 2944, 2229, 1595, 1497, 1366, 1264, 1163, 757, 730  $\text{cm}^{-1}$ ; HRMS (ESI)  $m/z$ :  $[\text{M} + \text{Na}]^+$  Calcd for  $\text{C}_{26}\text{H}_{23}\text{NNaO}_3\text{S}$  452.1291; Found 452.1288.

***N*-((2,6-dimethylphenyl)ethynyl)-*N*-(3-phenylprop-2-yn-1-yl)benzenesulfonamide (**1f**)**

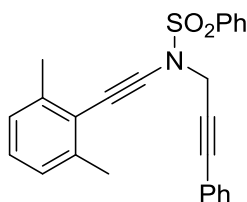

**1f**

Compound **1f** was prepared in 65% yield (259.7 mg) according to the general procedure. The substrate was isolated through silica gel column chromatography (PE:EA = 15:1) as a white solid (mp 106–108 °C).  $^1\text{H}$  NMR (400 MHz,  $\text{CDCl}_3$ )  $\delta$  8.04 (d,  $J = 8.0$  Hz, 2H), 7.62 – 7.45 (m, 3H), 7.30 – 7.12 (m, 5H), 7.10 – 7.03 (m, 1H), 7.03 – 6.96 (m, 2H), 4.63 (s, 2H), 2.36 (s, 6H);  $^{13}\text{C}$  NMR (100 MHz,  $\text{CDCl}_3$ )  $\delta$  140.0, 137.3, 133.7, 131.6, 129.0, 128.6, 128.1, 127.4, 126.5, 122.2, 121.8, 89.6, 86.5, 81.1, 69.0, 43.1, 21.0; IR (neat): 3059, 2919, 2231, 1490, 1368, 1172, 1122, 1089, 756, 733  $\text{cm}^{-1}$ ; HRMS (ESI)  $m/z$ :  $[\text{M} + \text{Na}]^+$  Calcd for  $\text{C}_{25}\text{H}_{21}\text{NNaO}_2\text{S}$  422.1185; Found 452.1278.

***N*-(mesitylethynyl)-*N*-(3-phenylprop-2-yn-1-yl)methanesulfonamide (**1g**)**

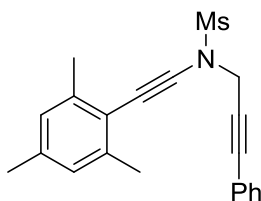

**1g**

Compound **1g** was prepared in 48% yield (168.7 mg) according to the general procedure. The substrate was isolated through silica gel column chromatography (PE:EA = 10:1) as a white solid (mp 80–82 °C).  $^1\text{H}$  NMR (400 MHz,  $\text{CDCl}_3$ )  $\delta$  7.46 – 7.28 (m, 5H), 6.86 (s,

2H), 4.62 (s, 2H), 3.26 (s, 3H), 2.40 (s, 6H), 2.27 (s, 3H);  $^{13}\text{C}$  NMR (100 MHz,  $\text{CDCl}_3$ )  $\delta$  140.00, 137.7, 131.8, 129.0, 128.4, 127.6, 121.7, 118.9, 88.5, 86.9, 81.6, 69.2, 43.1, 38.3, 21.3, 21.0; IR (neat): 3053, 2921, 2238, 1491, 1363, 1265, 1168, 1038, 738, 706  $\text{cm}^{-1}$ ; HRMS (ESI)  $m/z$ :  $[\text{M} + \text{Na}]^+$  Calcd for  $\text{C}_{21}\text{H}_{21}\text{NNaO}_2\text{S}$  374.1185; Found 374.1185.

***N*-((4-fluoro-2,6-dimethylphenyl)ethynyl)-*N*-(3-phenylprop-2-yn-1-yl)methanesulfonamide (**1h**)**

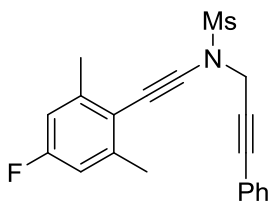

**1h**

Compound **1h** was prepared in 78% yield (277.2 mg) according to the general procedure. The substrate was isolated through silica gel column chromatography (PE:EA = 15:1) as a red oil.  $^1\text{H}$  NMR (400 MHz,  $\text{CDCl}_3$ )  $\delta$  7.46 – 7.40 (m, 2H), 7.39 – 7.29 (m, 3H), 6.74 (d,  $J = 9.2$  Hz, 2H), 4.62 (s, 2H), 3.26 (s, 3H), 2.42 (s, 6H);  $^{13}\text{C}$  NMR (100 MHz,  $\text{CDCl}_3$ )  $\delta$  161.7 (d,  $J = 247.0$  Hz), 142.6 (d,  $J = 9.0$  Hz), 131.7, 129.1, 128.4, 121.6, 117.9 (d,  $J = 3.0$  Hz), 113.7 (d,  $J = 21.0$  Hz), 88.8 (d,  $J = 1.0$  Hz), 86.9, 81.5, 68.2, 43.0, 38.4, 21.1 (d,  $J = 1.0$  Hz);  $^{19}\text{F}$  NMR (376 MHz,  $\text{CDCl}_3$ )  $\delta$  -112.7; IR (neat): 3021, 2928, 2242, 1490, 1364, 1168, 1135, 1039, 775, 758  $\text{cm}^{-1}$ ; HRMS (ESI)  $m/z$ :  $[\text{M} + \text{Na}]^+$  Calcd for  $\text{C}_{20}\text{H}_{18}\text{FNNaO}_2\text{S}$  378.0934; Found 378.0935

***N*-((4-chloro-2,6-dimethylphenyl)ethynyl)-*N*-(3-phenylprop-2-yn-1-yl)methanesulfonamide (**1i**)**

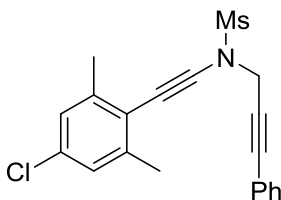

**1i**

Compound **1i** was prepared in 66% yield (245.4 mg) according to the general procedure. The substrate was isolated through silica gel column chromatography (PE:EA = 15:1) as

a pale red solid (mp 52–54 °C).  $^1\text{H}$  NMR (400 MHz,  $\text{CDCl}_3$ )  $\delta$  7.46 – 7.40 (m, 2H), 7.39 – 7.29 (m, 3H), 7.03 (s, 2H), 4.63 (s, 2H), 3.27 (s, 3H), 2.40 (s, 6H);  $^{13}\text{C}$  NMR (100 MHz,  $\text{CDCl}_3$ )  $\delta$  141.6, 133.1, 131.8, 129.1, 128.5, 126.7, 121.6, 120.6, 90.0, 87.0, 81.4, 68.5, 43.0, 38.5, 20.9; IR (neat): 3055, 2927, 2235, 1491, 1364, 1167, 1121, 1038, 757, 703  $\text{cm}^{-1}$ ; HRMS (ESI)  $m/z$ :  $[\text{M} + \text{Na}]^+$  Calcd for  $\text{C}_{20}\text{H}_{18}\text{ClNNaO}_2\text{S}$  394.0639; Found 394.0654.

***N*-((4-bromo-2,6-dimethylphenyl)ethynyl)-*N*-(3-phenylprop-2-yn-1-yl)methanesulfonamide (1j)**

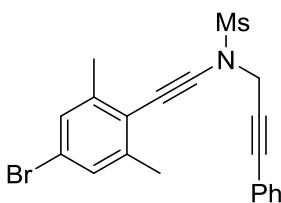

**1j**

Compound **1j** was prepared in 60% yield (249.8 mg) according to the general procedure. The substrate was isolated through silica gel column chromatography (PE:EA = 15:1) as a red oil.  $^1\text{H}$  NMR (400 MHz,  $\text{CDCl}_3$ )  $\delta$  7.47 – 7.40 (m, 2H), 7.39 – 7.29 (m, 3H), 7.18 (s, 2H), 4.63 (s, 2H), 3.27 (s, 3H), 2.40 (s, 6H);  $^{13}\text{C}$  NMR (100 MHz,  $\text{CDCl}_3$ )  $\delta$  141.7, 131.7, 129.6, 129.1, 128.5, 121.5, 121.4, 121.1, 90.2, 87.0, 81.3, 68.6, 42.9, 38.5, 20.8; IR (neat): 3056, 2928, 2236, 1490, 1365, 1167, 1117, 1038, 773, 758  $\text{cm}^{-1}$ ; HRMS (ESI)  $m/z$ :  $[\text{M} + \text{Na}]^+$  Calcd for  $\text{C}_{20}\text{H}_{18}\text{BrNNaO}_2\text{S}$  438.0133; Found 438.0139.

***N*-((2-chlorophenyl)ethynyl)-*N*-(3-phenylprop-2-yn-1-yl)methanesulfonamide (1k)**

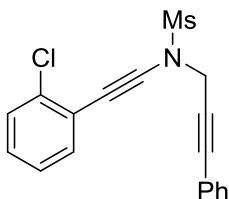

**1k**

Compound **1k** was prepared in 69% yield (237.2 mg) according to the general procedure. The substrate was isolated through silica gel column chromatography (PE:EA = 15:1) as a pale yellow oil.  $^1\text{H}$  NMR (400 MHz,  $\text{CDCl}_3$ )  $\delta$  7.52 – 7.42 (m, 3H), 7.41 – 7.28 (m, 4H),



7.26 – 7.16 (m, 2H), 4.62 (s, 2H), 3.31 (s, 3H);  $^{13}\text{C}$  NMR (100 MHz,  $\text{CDCl}_3$ )  $\delta$  135.9, 132.9, 131.8, 129.1(4), 129.1(0), 129.0, 128.4, 126.4, 122.3, 121.7, 87.1, 86.3, 81.3, 68.7, 43.0, 38.8; IR (neat): 3020, 2928, 2237, 1490, 1364, 1167, 1122, 1037, 780, 755  $\text{cm}^{-1}$ ; HRMS (ESI)  $m/z$ :  $[\text{M} + \text{Na}]^+$  Calcd for  $\text{C}_{18}\text{H}_{14}\text{ClNNaO}_2\text{S}$  366.0326; Found 366.0338.

***N*-(cyclopropylethynyl)-*N*-(3-phenylprop-2-yn-1-yl)methanesulfonamide (**1l**)**

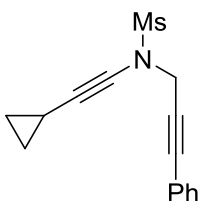

**1l**

Compound **1l** was prepared in 27% yield (73.8 mg) according to the general procedure. The substrate was isolated through silica gel column chromatography (PE:EA = 15:1) as a pale yellow oil.  $^1\text{H}$  NMR (400 MHz,  $\text{CDCl}_3$ )  $\delta$  7.49 – 7.40 (m, 2H), 7.39 – 7.30 (m, 3H), 4.45 (s, 2H), 3.17 (s, 3H), 1.41 – 1.31 (m, 1H), 0.89 – 0.79 (m, 2H), 0.78 – 0.67 (m, 2H);  $^{13}\text{C}$  NMR (100 MHz,  $\text{CDCl}_3$ )  $\delta$  131.7, 128.9, 128.4, 121.8, 86.5, 81.7, 75.5, 67.8, 42.8, 38.0, 8.9, -0.9; IR (neat): 3014, 2929, 2247, 1490, 1360, 1165, 1095, 1043, 758, 692  $\text{cm}^{-1}$ ; HRMS (ESI)  $m/z$ :  $[\text{M} + \text{Na}]^+$  Calcd for  $\text{C}_{15}\text{H}_{15}\text{NNaO}_2\text{S}$  296.0716; Found 296.0726.

***N*-((2,6-dimethylphenyl)ethynyl)-*N*-(3-(4-fluorophenyl)prop-2-yn-1-yl)methanesulfonamide (**1m**)**

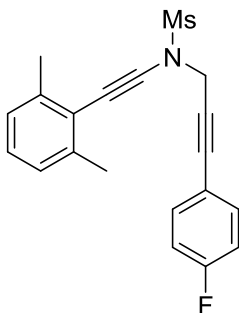

**1m**

Compound **1m** was prepared in 72% yield (255.9 mg) according to the general procedure. The substrate was isolated through silica gel column chromatography (PE:EA = 12:1) as a white solid (mp 58–60 °C).  $^1\text{H}$  NMR (400 MHz,  $\text{CDCl}_3$ )  $\delta$  7.44 – 7.38 (m, 2H), 7.12 –

7.06 (m, 1H), 7.06 – 6.97 (m, 4H), 4.61 (s, 2H), 3.26 (s, 3H), 2.43 (s, 6H);  $^{13}\text{C}$  NMR (100 MHz,  $\text{CDCl}_3$ )  $\delta$  162.8 (d,  $J = 250.0$  Hz), 139.8, 133.7 (d,  $J = 9.0$  Hz), 127.5, 126.6, 121.9, 117.7 (d,  $J = 4.0$  Hz), 115.8 (d,  $J = 22.0$  Hz), 89.3, 85.8, 81.3, 69.3, 42.9, 38.3, 21.0;  $^{19}\text{F}$  NMR (376 MHz,  $\text{CDCl}_3$ )  $\delta$  -109.4; IR (neat): 2920, 2232, 1507, 1364, 1322, 1231, 1167, 1040, 788, 765  $\text{cm}^{-1}$ ; HRMS (ESI)  $m/z$ :  $[\text{M} + \text{Na}]^+$  Calcd for  $\text{C}_{20}\text{H}_{18}\text{FNNaO}_2\text{S}$  378.0934; Found 378.0939.

***N*-(3-(4-chlorophenyl)prop-2-yn-1-yl)-*N*-((2,6-dimethylphenyl)ethynyl)methanesulfonamide (1n)**

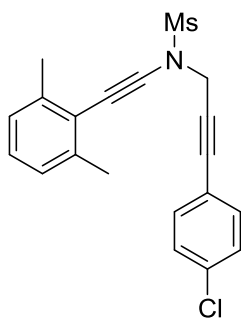

**1n**

Compound **1n** was prepared in 50% yield (185.9 mg) according to the general procedure. The substrate was isolated through silica gel column chromatography (PE:EA = 15:1) as a pale red solid (mp 90–92 °C).  $^1\text{H}$  NMR (400 MHz,  $\text{CDCl}_3$ )  $\delta$  7.35 (d,  $J = 8.4$  Hz, 2H), 7.29 (d,  $J = 8.4$  Hz, 2H), 7.13 – 7.06 (m, 1H), 7.06 – 6.99 (m, 2H), 4.61 (s, 2H), 3.25 (s, 3H), 2.43 (s, 6H);  $^{13}\text{C}$  NMR (100 MHz,  $\text{CDCl}_3$ )  $\delta$  139.8, 135.1, 133.0, 128.8, 127.6, 126.6, 121.9, 120.1, 89.2, 85.7, 82.6, 69.4, 42.8, 38.3, 21.0; IR (neat): 3020, 2930, 2232, 1489, 1364, 1167, 1091, 1039, 788, 765  $\text{cm}^{-1}$ ; HRMS (ESI)  $m/z$ :  $[\text{M} + \text{Na}]^+$  Calcd for  $\text{C}_{20}\text{H}_{18}\text{ClNNaO}_2\text{S}$  394.0639; Found 394.0651.

***N*-(3-(4-bromophenyl)prop-2-yn-1-yl)-*N*-((2,6-dimethylphenyl)ethynyl)methanesulfonamide (1o)**

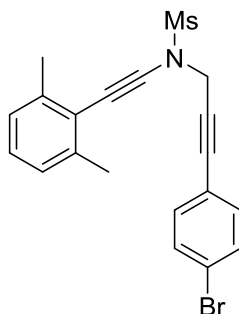

**1o**

Compound **1o** was prepared in 54% yield (224.8 mg) according to the general procedure. The substrate was isolated through silica gel column chromatography (PE:EA = 15:1) as a yellow solid (mp 92–94 °C). <sup>1</sup>H NMR (400 MHz, CDCl<sub>3</sub>) δ 7.46 (d, *J* = 8.4 Hz, 2H), 7.29 (d, *J* = 8.4 Hz, 2H), 7.13 – 7.07 (m, 1H), 7.06 – 7.00 (m, 2H), 4.62 (s, 2H), 3.25 (s, 3H), 2.43 (s, 6H); <sup>13</sup>C NMR (100 MHz, CDCl<sub>3</sub>) δ 139.8, 133.2, 131.8, 127.6, 126.7, 123.4, 121.9, 120.6, 89.2, 85.8, 82.7, 69.4, 42.9, 38.4, 21.1; IR (neat): 2927, 2232, 1485, 1364, 1275, 1166, 1071, 1040, 764, 750 cm<sup>-1</sup>; HRMS (ESI) *m/z*: [M + Na]<sup>+</sup> Calcd for C<sub>20</sub>H<sub>18</sub>BrNNaO<sub>2</sub>S 438.0133; Found 438.0127.

***N*-((2,6-dimethylphenyl)ethynyl)-*N*-(3-(*p*-tolyl)prop-2-yn-1-yl)methanesulfonamide (1p)**

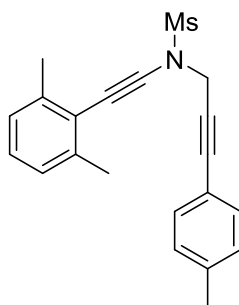

**1p**

Compound **1p** was prepared in 58% yield (203.8 mg) according to the general procedure. The substrate was isolated through silica gel column chromatography (PE:EA = 15:1) as a red solid (mp 73–75 °C). <sup>1</sup>H NMR (400 MHz, CDCl<sub>3</sub>) δ 7.32 (d, *J* = 8.0 Hz, 2H), 7.12 (d, *J* = 8.0 Hz, 2H), 7.10 – 6.99 (m, 3H), 4.61 (s, 2H), 3.26 (s, 3H), 2.44 (s, 6H), 2.35 (s, 3H); <sup>13</sup>C NMR (100 MHz, CDCl<sub>3</sub>) δ 139.9, 139.3, 131.7, 129.2, 127.5, 126.6, 122.0, 118.6, 89.5, 87.1, 80.8, 69.2, 43.1, 38.3, 21.4, 21.0; IR (neat): 2921, 2232, 1509, 1364,

1322, 1166, 1077, 1039, 787, 765  $\text{cm}^{-1}$ ; HRMS (ESI)  $m/z$ :  $[\text{M} + \text{Na}]^+$  Calcd for  $\text{C}_{21}\text{H}_{21}\text{NNaO}_2\text{S}$  374.1185; Found 374.1187.

***N*-((2,6-dimethylphenyl)ethynyl)-*N*-(3-(4-methoxyphenyl)prop-2-yn-1-yl)methanesulfonamide (**1q**)**

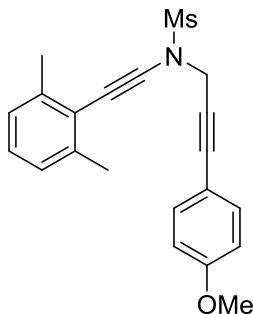

**1q**

Compound **1q** was prepared in 52% yield (191.1 mg) according to the general procedure. The substrate was isolated through silica gel column chromatography (PE:EA = 15:1) as a white solid (mp 53–55 °C).  $^1\text{H}$  NMR (400 MHz,  $\text{CDCl}_3$ )  $\delta$  7.37 (d,  $J = 8.8$  Hz, 2H), 7.12 – 7.05 (m, 1H), 7.05 – 6.97 (m, 2H), 6.83 (d,  $J = 8.8$  Hz, 2H), 4.60 (s, 2H), 3.79 (s, 3H), 3.25 (s, 3H), 2.43 (s, 6H);  $^{13}\text{C}$  NMR (100 MHz,  $\text{CDCl}_3$ )  $\delta$  160.1, 139.8, 133.2, 127.4, 126.6, 122.0, 114.0, 113.6, 89.5, 86.9, 80.1, 69.1, 55.2, 43.1, 38.3, 21.0; IR (neat): 2932, 2232, 1606, 1509, 1363, 1249, 1166, 1035, 787, 765  $\text{cm}^{-1}$ ; HRMS (ESI)  $m/z$ :  $[\text{M} + \text{Na}]^+$  Calcd for  $\text{C}_{21}\text{H}_{21}\text{NNaO}_3\text{S}$  390.1134; Found 390.1135.

***N*-(3-(3-bromophenyl)prop-2-yn-1-yl)-*N*-((2,6-dimethylphenyl)ethynyl)methanesulfonamide (**1r**)**

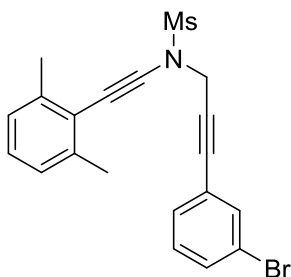

**1r**

Compound **1r** was prepared in 30% yield (124.9 mg) according to the general procedure. The substrate was isolated through silica gel column chromatography (PE:EA = 15:1) as

a brown oil.  $^1\text{H}$  NMR (400 MHz,  $\text{CDCl}_3$ )  $\delta$  7.57 (s, 1H), 7.47 (d,  $J = 7.6$  Hz, 1H), 7.35 (d,  $J = 7.2$  Hz, 1H), 7.24 – 7.15 (m, 1H), 7.12 – 6.99 (m, 3H), 4.61 (s, 2H), 3.25 (s, 3H), 2.43 (s, 6H);  $^{13}\text{C}$  NMR (100 MHz,  $\text{CDCl}_3$ )  $\delta$  139.8, 134.4, 132.2, 130.3, 129.9, 127.5, 126.6, 123.5, 122.1, 121.8, 89.1, 85.2, 82.9, 69.4, 42.7, 38.3, 21.0; IR (neat): 3019, 2929, 2232, 1473, 1364, 1167, 1077, 1041, 786, 770  $\text{cm}^{-1}$ ; HRMS (ESI)  $m/z$ :  $[\text{M} + \text{Na}]^+$  Calcd for  $\text{C}_{20}\text{H}_{18}\text{BrNNaO}_2\text{S}$  438.0133; Found 438.0127.

***N*-((2,6-dimethylphenyl)ethynyl)-*N*-(3-(*m*-tolyl)prop-2-yn-1-yl)methanesulfonamide (1s)**

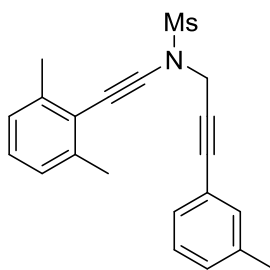

**1s**

Compound **1s** was prepared in 79% yield (277.7 mg) according to the general procedure. The substrate was isolated through silica gel column chromatography (PE:EA = 15:1) as a yellow solid (mp 47–49 °C).  $^1\text{H}$  NMR (400 MHz,  $\text{CDCl}_3$ )  $\delta$  7.28 – 7.21 (m, 2H), 7.20 – 7.12 (m, 2H), 7.11 – 7.05 (m, 1H), 7.04 – 6.98 (m, 2H), 4.59 (s, 2H), 3.24 (s, 3H), 2.44 (s, 6H), 2.30 (s, 3H);  $^{13}\text{C}$  NMR (100 MHz,  $\text{CDCl}_3$ )  $\delta$  139.8, 138.1, 132.2, 129.9, 128.8, 128.3, 127.4, 126.6, 121.9, 121.4, 89.4, 87.0, 81.1, 69.2, 42.9, 38.2, 21.0, 20.9; IR (neat): 3021, 2921, 2231, 1468, 1363, 1167, 1078, 1042, 787, 766  $\text{cm}^{-1}$ ; HRMS (ESI)  $m/z$ :  $[\text{M} + \text{Na}]^+$  Calcd for  $\text{C}_{21}\text{H}_{21}\text{NNaO}_2\text{S}$  374.1185; Found 374.1189.

***N*-(3-(2-bromophenyl)prop-2-yn-1-yl)-*N*-((2,6-dimethylphenyl)ethynyl)methanesulfonamide (1t)**

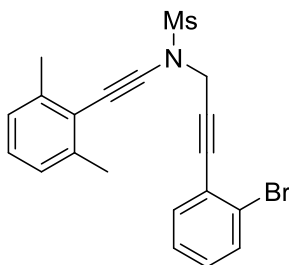

### 1t

Compound **1t** was prepared in 50% yield (208.2 mg) according to the general procedure. The substrate was isolated through silica gel column chromatography (PE:EA = 15:1) as a brown oil.  $^1\text{H}$  NMR (400 MHz,  $\text{CDCl}_3$ )  $\delta$  7.56 (dd,  $J = 8.0, 0.8$  Hz, 1H), 7.46 (dd,  $J = 7.6, 1.6$  Hz, 1H), 7.29 – 7.22 (m, 1H), 7.21 – 7.15 (m, 1H), 7.11 – 7.05 (m, 1H), 7.04 – 6.97 (m, 2H), 4.67 (s, 2H), 3.31 (s, 3H), 2.42 (s, 6H);  $^{13}\text{C}$  NMR (100 MHz,  $\text{CDCl}_3$ )  $\delta$  139.8, 133.7, 132.4, 130.2, 127.4, 127.1, 126.5, 125.3, 123.8, 121.9, 89.2, 86.0, 85.1, 69.3, 42.9, 38.5, 21.0; IR (neat): 3019, 2928, 2232, 1470, 1364, 1167, 1078, 1039, 789, 764 ; HRMS (ESI)  $m/z$ :  $[\text{M} + \text{Na}]^+$  Calcd for  $\text{C}_{20}\text{H}_{18}\text{BrNNaO}_2\text{S}$  438.0133; Found 438.0134.

### *N*-((2,6-dimethylphenyl)ethynyl)-*N*-(3-(*o*-tolyl)prop-2-yn-1-yl)methanesulfonamide (1u)

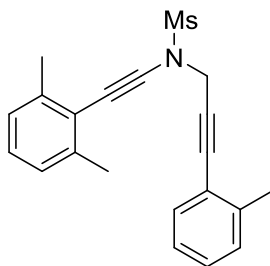

### 1u

Compound **1u** was prepared in 61% yield (214.4 mg) according to the general procedure. The substrate was isolated through silica gel column chromatography (PE:EA = 15:1) as a white solid (mp 71–73 °C).  $^1\text{H}$  NMR (400 MHz,  $\text{CDCl}_3$ )  $\delta$  7.39 (d,  $J = 7.6$  Hz, 1H), 7.24 – 7.05 (m, 4H), 7.04 – 6.97 (m, 2H), 4.66 (s, 2H), 3.25 (s, 3H), 2.42 (s, 6H), 2.41 (s, 3H);  $^{13}\text{C}$  NMR (100 MHz,  $\text{CDCl}_3$ )  $\delta$  140.3, 139.7, 132.1, 129.5, 129.0, 127.4, 126.6, 125.6, 121.9, 121.4, 89.4, 85.7, 85.2, 69.2, 43.0, 38.4, 21.0, 20.6; IR (neat): 3021, 2921, 2232, 1485, 1364, 1167, 1077, 1037, 788, 762  $\text{cm}^{-1}$ ; HRMS (ESI)  $m/z$ :  $[\text{M} + \text{Na}]^+$  Calcd for  $\text{C}_{21}\text{H}_{21}\text{NNaO}_2\text{S}$  374.1185; Found 374.1190.

### *N*-((2,6-dimethylphenyl)ethynyl)-*N*-(3-(thiophen-3-yl)prop-2-yn-1-yl)methanesulfonamide (1v)

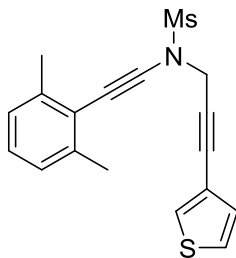

**1v**

Compound **1v** was prepared in 85% yield (291.9 mg) according to the general procedure. The substrate was isolated through silica gel column chromatography (PE:EA = 15:1) as a white solid (mp 65–67 °C).  $^1\text{H}$  NMR (400 MHz,  $\text{CDCl}_3$ )  $\delta$  7.45 (d,  $J = 2.8$  Hz, 1H), 7.24 (dd,  $J = 4.8, 2.8$  Hz, 1H), 7.12 – 7.04 (m, 2H), 7.04 – 6.98 (m, 2H), 4.57 (s, 2H), 3.22 (s, 3H), 2.43 (s, 6H);  $^{13}\text{C}$  NMR (100 MHz,  $\text{CDCl}_3$ )  $\delta$  139.7, 129.8, 129.5, 127.4, 126.5, 125.6, 121.8, 120.5, 89.3, 82.0, 81.1, 69.1, 42.8, 38.1, 20.9; IR (neat): 3019, 2927, 2231, 1467, 1361, 1166, 1077, 1039, 786, 765  $\text{cm}^{-1}$ ; HRMS (ESI)  $m/z$ :  $[\text{M} + \text{Na}]^+$  Calcd for  $\text{C}_{18}\text{H}_{17}\text{NNaO}_2\text{S}_2$  366.0593; Found 366.0597.

***N*-((2,6-dimethylphenyl)ethynyl)-*N*-(3-(thiophen-2-yl)prop-2-yn-1-yl)methanesulfonamide (**1w**)**

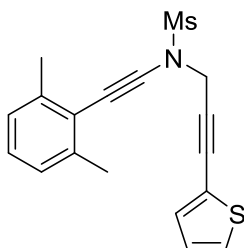

**1w**

Compound **1w** was prepared in 64% yield (219.8 mg) according to the general procedure. The substrate was isolated through silica gel column chromatography (PE:EA = 15:1) as a brown solid (mp 65–67 °C).  $^1\text{H}$  NMR (400 MHz,  $\text{CDCl}_3$ )  $\delta$  7.35 (dd,  $J = 5.2, 1.2$  Hz, 1H), 7.30 (dd,  $J = 3.6, 0.8$  Hz, 1H), 7.19 – 7.13 (m, 1H), 7.13 – 7.07 (m, 2H), 7.04 (dd,  $J = 5.2, 3.6$  Hz, 1H), 4.69 (s, 2H), 3.31 (s, 3H), 2.51 (s, 6H);  $^{13}\text{C}$  NMR (100 MHz,  $\text{CDCl}_3$ )  $\delta$  139.9, 133.0, 128.0, 127.5, 127.0, 126.6, 121.8, 121.3, 89.2, 85.5, 80.3, 69.3, 43.1, 38.2, 21.0; IR (neat): 3019, 2929, 2231, 1467, 1363, 1167, 1077, 1034, 788, 765  $\text{cm}^{-1}$ ; HRMS (ESI)  $m/z$ :  $[\text{M} + \text{Na}]^+$  Calcd for  $\text{C}_{18}\text{H}_{17}\text{NNaO}_2\text{S}_2$  366.0593; Found 366.0591.

**4-bromo-*N*-((2,6-dimethylphenyl)ethynyl)-*N*-(3-(4-ethoxyphenyl)prop-2-yn-1-yl)benzenesulfonamide (1y)**

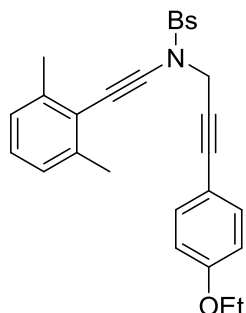

**1y**

Compound **1y** was prepared in 34% yield (177.6 mg) according to the general procedure. The substrate was isolated through silica gel column chromatography (PE:EA = 15:1) as a pale yellow solid (mp 106–108 °C).  $^1\text{H}$  NMR (400 MHz,  $\text{CDCl}_3$ )  $\delta$  7.87 (d,  $J$  = 8.8 Hz, 2H), 7.58 (d,  $J$  = 8.4 Hz, 2H), 7.10 – 6.95 (m, 5H), 6.76 (d,  $J$  = 8.8 Hz, 2H), 4.58 (s, 2H), 3.98 (q,  $J$  = 6.8 Hz, 2H), 2.36 (s, 6H), 1.38 (t,  $J$  = 6.8 Hz, 3H);  $^{13}\text{C}$  NMR (100 MHz,  $\text{CDCl}_3$ )  $\delta$  159.2, 140.0, 136.3, 133.0, 132.1, 129.6, 129.0, 127.4, 126.5, 122.0, 114.4, 113.4, 89.5, 86.8, 79.4, 69.0, 63.4, 43.3, 21.0, 14.6; IR (neat): 2980, 2926, 2231, 1605, 1508, 1371, 1172, 1043, 784, 747  $\text{cm}^{-1}$ ; HRMS (ESI)  $m/z$ :  $[\text{M} + \text{K}]^+$  Calcd for  $\text{C}_{27}\text{H}_{24}\text{BrNNaO}_3\text{S}$  560.0292; Found 560.0284.

***N*-(naphthalen-1-ylethynyl)-*N*-(3-phenylprop-2-yn-1-yl)methanesulfonamide (1aa)**

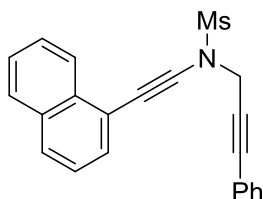

**1aa**

Compound **1aa** was prepared in 39% yield (140.2 mg) according to the general procedure. The substrate was isolated through silica gel column chromatography (PE:EA = 15:1) as a brown oil.  $^1\text{H}$  NMR (400 MHz,  $\text{CDCl}_3$ )  $\delta$  8.37 (d,  $J$  = 8.0 Hz, 1H), 7.85 – 7.73 (m, 2H), 7.67 (d,  $J$  = 7.2 Hz, 1H), 7.51 – 7.28 (m, 8H), 4.68 (s, 2H), 3.30 (s, 3H);  $^{13}\text{C}$  NMR (100 MHz,  $\text{CDCl}_3$ )  $\delta$  133.2, 133.1, 131.8, 130.2, 129.1, 128.6, 128.4, 128.2, 126.8, 126.3,



126.0, 125.1, 121.6, 119.8, 87.2, 85.8, 81.6, 69.7, 43.0, 38.6; IR (neat): 3057, 2925, 2230, 1489, 1360, 1321, 1189, 1165, 800, 756  $\text{cm}^{-1}$ ; HRMS (ESI)  $m/z$ :  $[\text{M} + \text{Na}]^+$  Calcd for  $\text{C}_{22}\text{H}_{17}\text{NNaO}_2\text{S}$  382.0878; Found 382.0881.

***N*-((3-fluorophenyl)ethynyl)-*N*-(3-phenylprop-2-yn-1-yl)methanesulfonamide (**1ab**)**

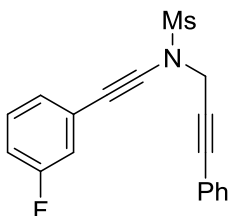

**1ab**

Compound **1ab** was prepared in 57% yield (186.6 mg) according to the general procedure. The substrate was isolated through silica gel column chromatography (PE:EA = 15:1) as a yellow oil.  $^1\text{H}$  NMR (400 MHz,  $\text{CDCl}_3$ )  $\delta$  7.51 – 7.42 (m, 2H), 7.38 – 7.28 (m, 3H), 7.28 – 7.20 (m, 2H), 7.13 (d,  $J = 9.2$  Hz, 1H), 7.03 – 6.93 (m, 1H), 4.59 (s, 2H), 3.25 (s, 3H);  $^{13}\text{C}$  NMR (100 MHz,  $\text{CDCl}_3$ )  $\delta$  162.2 (d,  $J = 245.0$  Hz), 131.7, 129.8 (d,  $J = 9.0$  Hz), 129.0, 128.4, 127.2 (d,  $J = 3.0$  Hz), 124.0 (d,  $J = 10.0$  Hz), 121.5, 118.1 (d,  $J = 23.0$  Hz), 115.3 (d,  $J = 21.0$  Hz), 87.0, 82.2, 81.2, 70.2 (d,  $J = 4.0$  Hz), 42.7, 38.7;  $^{19}\text{F}$  NMR (376 MHz,  $\text{CDCl}_3$ )  $\delta$  -112.8; IR (neat): 3020, 2930, 2241, 1489, 1363, 1324, 1166, 1038, 869, 757  $\text{cm}^{-1}$ ; HRMS (ESI)  $m/z$ :  $[\text{M} + \text{Na}]^+$  Calcd for  $\text{C}_{18}\text{H}_{14}\text{FNNaO}_2\text{S}$  350.0627; Found 350.0630.

***N*-((3-bromophenyl)ethynyl)-*N*-(3-phenylprop-2-yn-1-yl)methanesulfonamide (**1ac**)**

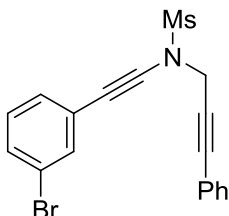

**1ac**

Compound **1ac** was prepared in 64% yield (248.5 mg) according to the general procedure. The substrate was isolated through silica gel column chromatography (PE:EA = 15:1) as a yellow oil.  $^1\text{H}$  NMR (400 MHz,  $\text{CDCl}_3$ )  $\delta$  7.60 – 7.56 (m, 1H), 7.48 – 7.43 (m, 2H),

7.43 – 7.38 (m, 1H), 7.38 – 7.29 (m, 4H), 7.18 – 7.11 (m, 1H), 4.59 (s, 2H), 3.25 (s, 3H);  $^{13}\text{C}$  NMR (100 MHz,  $\text{CDCl}_3$ )  $\delta$  134.0, 131.7, 131.1, 129.9, 129.7, 129.0, 128.4, 124.2, 121.9, 121.4, 87.1, 82.5, 81.2, 70.0, 42.8, 38.8; IR (neat): 3020, 2929, 2237, 1490, 1364, 1323, 1167, 1039, 789, 758  $\text{cm}^{-1}$ ; HRMS (ESI)  $m/z$ :  $[\text{M} + \text{Na}]^+$  Calcd for  $\text{C}_{18}\text{H}_{14}\text{BrNNaO}_2\text{S}$  409.9826; Found 409.9825.

[D<sub>2</sub>]-**1a** (>99% D)

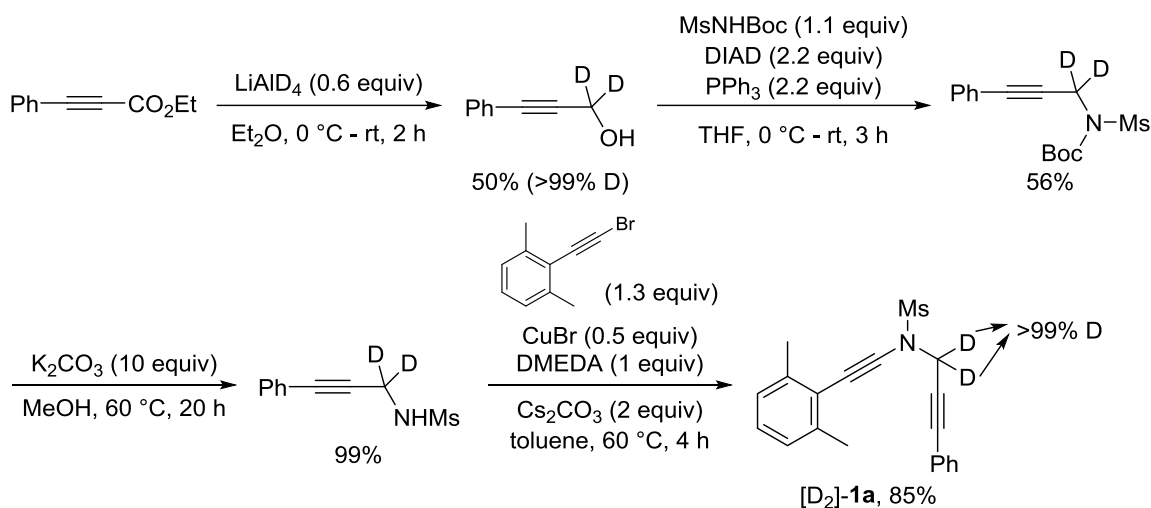

Compound [D<sub>2</sub>]-**1a** was prepared in 85% yield (288.5 mg) according to the above general procedure.<sup>2</sup> The substrate was isolated through silica gel column chromatography (PE:EA = 15:1) as a red oil.  $^1\text{H}$  NMR (400 MHz,  $\text{CDCl}_3$ )  $\delta$  7.46 – 7.40 (m, 2H), 7.37 – 7.27 (m, 3H), 7.11 – 7.05 (m, 1H), 7.05 – 6.98 (m, 2H), 3.24 (s, 3H), 2.43 (s, 6H);  $^{13}\text{C}$  NMR (100 MHz,  $\text{CDCl}_3$ )  $\delta$  139.8, 131.7, 129.0, 128.4, 127.5, 126.6, 121.9, 121.6, 89.3, 86.8, 81.4, 69.2, 38.2, 21.0; IR (neat): 3020, 2918, 2240, 1489, 1363, 1321, 1169, 1105, 961, 757  $\text{cm}^{-1}$ ; HRMS (ESI)  $m/z$ :  $[\text{M} + \text{Na}]^+$  Calcd for  $\text{C}_{20}\text{H}_{17}\text{D}_2\text{NNaO}_2\text{S}$  362.1160; Found 362.1158.

## 2.2 General procedure for the synthesis of diketones **2** (**2b-2c**)<sup>3,4</sup>

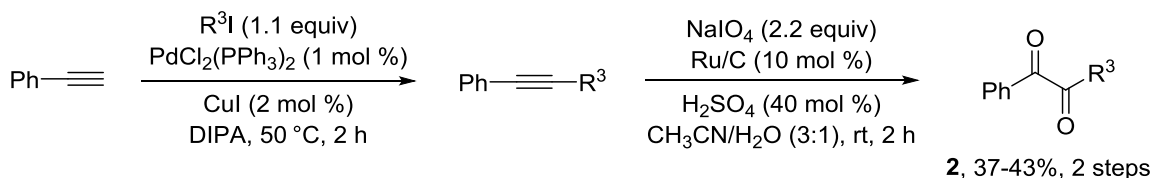

To a solution of styrene (2.0 mmol) in DIPA (0.2 M) was added copper iodide (0.04

mmol, 7.6 mg), Pd(PPh<sub>3</sub>)<sub>2</sub>Cl<sub>2</sub> (0.01 mmol, 7.0 mg), aryl iodide (2.2 mmol, 1.1 equiv). The reaction was stirred at 50 °C for about 2 h and the progress of the reaction was monitored by TLC. Upon completion, the solution was then filtered and concentrated under a reduced pressure. The residue was purified by silica gel column chromatography (PE).

The above product was added to a stirred solution of Ru/C (0.2 mmol, 20 mg), H<sub>2</sub>SO<sub>4</sub> (0.8 mmol) in CH<sub>3</sub>CN (7.5 mL) and H<sub>2</sub>O (2.5 mL), The resulting mixture was then stirred at room temperature for about 2 h and the progress of the reaction was monitored by TLC. Upon completion, the solution was then filtered and concentrated under a reduced pressure. The residue was purified by silica gel column chromatography (PE).

### 1-phenyl-2-(thiophen-2-yl)ethane-1,2-dione (2b)

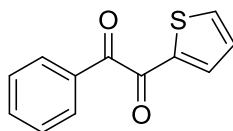

**2b**

Compound **2b** was prepared in 37% yield (160.0 mg) according to the general procedure. The substrate was isolated through silica gel column chromatography (PE) as a yellow oil. <sup>1</sup>H NMR (400 MHz, CDCl<sub>3</sub>) δ 8.03 (d, *J* = 7.2 Hz, 2H), 7.82 (d, *J* = 4.8 Hz, 1H), 7.79 (d, *J* = 3.6 Hz, 1H), 7.68 – 7.58 (m, 1H), 7.55 – 7.40 (m, 2H), 7.22 – 7.09 (m, 1H); <sup>13</sup>C NMR (100 MHz, CDCl<sub>3</sub>) δ 192.0, 185.5, 139.7, 136.8, 136.6, 134.8, 132.5, 130.1, 128.8, 128.7; IR (neat): 3103, 2924, 1676, 1652, 1595, 1410, 1213, 1178, 742, 717 cm<sup>-1</sup>; HRMS (ESI) *m/z*: [M + Na]<sup>+</sup> Calcd for C<sub>12</sub>H<sub>8</sub>NaO<sub>2</sub>S 239.0137; Found 239.0129.

### 1-(2-isopropylphenyl)-2-phenylethane-1,2-dione (2c)

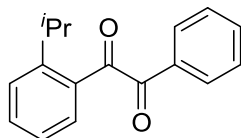

**2c**

Compound **2c** was prepared in 43% yield (236.6 mg) according to the general procedure.

The substrate was isolated through silica gel column chromatography (PE) as a yellow oil.  $^1\text{H}$  NMR (400 MHz,  $\text{CDCl}_3$ )  $\delta$  7.88 (d,  $J = 7.6$  Hz, 2H), 7.55 – 7.33 (m, 6H), 7.14 – 7.06 (m, 1H), 3.90 – 3.71 (m, 1H), 1.19 (s, 3H), 1.18 (s, 3H);  $^{13}\text{C}$  NMR (100 MHz,  $\text{CDCl}_3$ )  $\delta$  196.9, 194.2, 151.6, 134.6, 133.7, 133.0, 132.4, 131.7, 129.8, 128.9, 127.0, 125.6, 29.2, 23.7; IR (neat): 2967, 2870, 1676, 1597, 1449, 1210, 1198, 1178, 759, 724  $\text{cm}^{-1}$ ; HRMS (ESI)  $m/z$ :  $[\text{M} + \text{Na}]^+$  Calcd for  $\text{C}_{17}\text{H}_{16}\text{NaO}_2$  275.1043; Found 275.1041.

### 2.3 General procedure for the synthesis of pyrrole-substituted dioxoles **3**

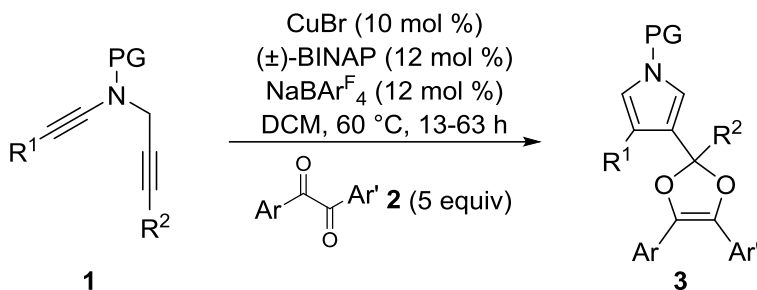

The powdered CuBr (0.01 mmol, 1.4 mg), (±)-BINAP (0.012 mmol, 7.5 mg), NaBAR<sup>F</sup><sub>4</sub> (0.012 mmol, 10.6 mg) were introduced into the Schlenk tubes. After DCM (2.5 mL) was added to the Schlenk tubes, the solution was stirred at 60 °C for 0.5 h. Subsequently, the *N*-propargyl ynamide **1** (0.1 mmol) and diketone **2** (0.5 mmol) in DCM (2.5 mL) were introduced into the system. The resulting mixture was stirred at 60 °C and the progress of the reaction was monitored by TLC. Upon completion, the mixture was concentrated and the residue was purified by flash chromatography on silica gel (eluent: hexanes/ethyl acetate) to afford the desired pyrrole-substituted dioxole **3**.

### 3-(2,6-dimethylphenyl)-1-(methylsulfonyl)-4-(2,4,5-triphenyl-1,3-dioxol-2-yl)-1*H*-pyrrole (**3a**)

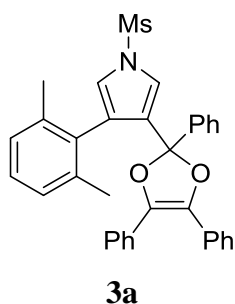

Compound **3a** was prepared in 89% yield (48.7 mg) according to the general procedure. The product was isolated through silica gel column chromatography (PE:EA = 15:1) as a white solid (mp 64–65 °C). <sup>1</sup>H NMR (400 MHz, CDCl<sub>3</sub>) δ 7.53 – 7.45 (m, 2H), 7.33 – 7.19 (m, 13H), 7.07 (d, *J* = 2.4 Hz, 1H), 7.02 – 6.97 (m, 1H), 6.90 (d, *J* = 2.4 Hz, 1H), 6.85 (d, *J* = 7.6 Hz, 2H), 3.16 (s, 3H), 1.95 (s, 6H); <sup>13</sup>C NMR (100 MHz, CDCl<sub>3</sub>) δ 141.0, 138.2, 133.1, 132.4, 129.2, 129.1, 128.6, 128.0, 127.8, 127.7, 127.4, 127.0, 126.6, 126.2, 125.7, 120.8, 119.0, 108.4, 42.8, 20.8; IR (neat): 3026, 2927, 1370, 1260, 1175, 1107, 1080, 983, 759, 693 cm<sup>-1</sup>; HRMS (ESI) *m/z*: [M + Na]<sup>+</sup> Calcd for C<sub>34</sub>H<sub>29</sub>NNaO<sub>4</sub>S 570.1710; Found 570.1701.

### 3-(2,6-dimethylphenyl)-1-tosyl-4-(2,4,5-triphenyl-1,3-dioxol-2-yl)-1*H*-pyrrole (**3b**)

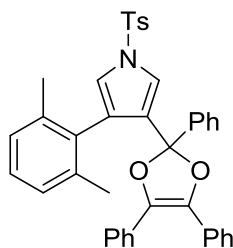

**3b**

Compound **3b** was prepared in 71% yield (44.3 mg) according to the general procedure. The product was isolated through silica gel column chromatography (PE:EA = 15:1) as a white solid (mp 169–171 °C). <sup>1</sup>H NMR (400 MHz, CDCl<sub>3</sub>) δ 7.69 (d, *J* = 8.0 Hz, 2H), 7.42 (d, *J* = 6.8 Hz, 2H), 7.33 – 7.15 (m, 15H), 7.10 (d, *J* = 2.4 Hz, 1H), 7.00 – 6.94 (m, 1H), 6.91 (d, *J* = 2.4 Hz, 1H), 6.81 (d, *J* = 7.6 Hz, 2H), 2.47 – 2.35 (s, 3H), 1.82 (s, 6H); <sup>13</sup>C NMR (100 MHz, CDCl<sub>3</sub>) δ 145.1, 141.0, 138.1, 136.0, 133.1, 132.5, 129.9, 129.2, 129.1, 128.5, 128.0, 127.7, 127.6, 127.3, 127.2, 126.7, 126.5, 126.2, 125.7, 121.3, 119.7, 108.5, 21.6, 20.7; IR (neat): 3059, 2922, 1374, 1261, 1188, 1174, 1106, 1079, 759, 693 cm<sup>-1</sup>; HRMS (ESI) *m/z*: [M + Na]<sup>+</sup> Calcd for C<sub>40</sub>H<sub>33</sub>NNaO<sub>4</sub>S 646.2023; Found 646.2018.

### 3-(2,6-dimethylphenyl)-1-(propylsulfonyl)-4-(2,4,5-triphenyl-1,3-dioxol-2-yl)-1*H*-pyrrole (**3c**)

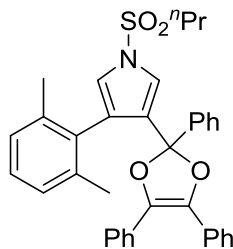

**3c**

Compound **3c** was prepared in 72% yield (41.4 mg) according to the general procedure. The product was isolated through silica gel column chromatography (PE:EA = 15:1) as a white solid (mp 147–149 °C). <sup>1</sup>H NMR (400 MHz, CDCl<sub>3</sub>) δ 7.48 (d, *J* = 6.8 Hz, 2H), 7.34 – 7.16 (m, 13H), 7.07 – 6.96 (m, 2H), 6.90 – 6.82 (m, 3H), 3.22 (t, *J* = 8.0, 2H), 1.95 (s, 6H), 1.78 – 1.66 (m, 2H), 1.00 (t, *J* = 7.2 Hz, 3H); <sup>13</sup>C NMR (100 MHz, CDCl<sub>3</sub>) δ 141.1, 138.2, 133.1, 132.5, 129.1, 128.9, 128.6, 128.0, 127.8, 127.7, 127.3, 126.6, 126.2, 125.7, 121.0, 119.5, 108.5, 57.2, 20.8, 17.1, 12.6; IR (neat): 3060, 2922, 1372, 1261, 1168, 1106, 1079, 1024, 759, 695 cm<sup>-1</sup>; HRMS (ESI) *m/z*: [M + Na]<sup>+</sup> Calcd for C<sub>36</sub>H<sub>33</sub>NNaO<sub>4</sub>S 598.2023; Found 598.2031.

**1-(benzylsulfonyl)-3-(2,6-dimethylphenyl)-4-(2,4,5-triphenyl-1,3-dioxol-2-yl)-1*H*-pyrrole (3d)**

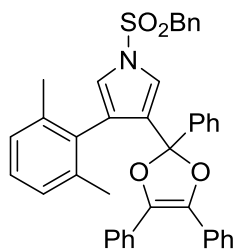

**3d**

Compound **3d** was prepared in 66% yield (41.2 mg) according to the general procedure. The product was isolated through silica gel column chromatography (PE:EA = 15:1) as a white solid (mp 149–151 °C). <sup>1</sup>H NMR (400 MHz, CDCl<sub>3</sub>) δ 7.38 – 7.28 (m, 5H), 7.28 – 7.20 (m, 13H), 7.13 (d, *J* = 7.2 Hz, 2H), 7.01 – 6.95 (m, 1H), 6.83 (d, *J* = 7.6 Hz, 2H), 6.67 (d, *J* = 2.4 Hz, 1H), 6.59 (d, *J* = 2.4 Hz, 1H), 4.47 (s, 2H), 1.93 (s, 6H); <sup>13</sup>C NMR (100 MHz, CDCl<sub>3</sub>) δ 140.9, 138.2, 133.0, 132.4, 130.4, 129.4, 129.1, 129.0, 128.5, 128.0, 127.7, 127.6, 127.3, 126.9, 126.6, 126.5, 126.2, 125.7, 121.8, 119.2, 108.4, 61.4, 21.0; IR

(neat): 3060, 2923, 1373, 1261, 1168, 1106, 1080, 1024, 759, 695  $\text{cm}^{-1}$ ; HRMS (ESI)  $m/z$ :  $[\text{M} + \text{Na}]^+$  Calcd for  $\text{C}_{40}\text{H}_{33}\text{NNaO}_4\text{S}$  646.2023; Found 646.2018.

**3-(2,6-dimethylphenyl)-1-((4-methoxyphenyl)sulfonyl)-4-(2,4,5-triphenyl-1,3-dioxol-2-yl)-1H-pyrrole (3e)**

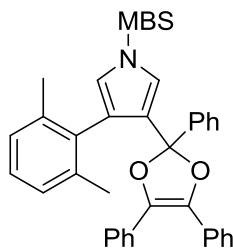

**3e**

Compound **3e** was prepared in 80% yield (51.2 mg) according to the general procedure. The product was isolated through silica gel column chromatography (PE:EA = 25:1) as a white solid (mp 159–161  $^{\circ}\text{C}$ ).  $^1\text{H}$  NMR (400 MHz,  $\text{CDCl}_3$ )  $\delta$  7.76 (d,  $J = 8.8$  Hz, 2H), 7.42 (d,  $J = 6.8$  Hz, 2H), 7.30 – 7.17 (m, 13H), 7.09 (s, 1H), 7.01 – 6.87 (m, 4H), 6.81 (d,  $J = 7.6$  Hz, 2H), 3.86 (s, 3H), 1.82 (s, 6H);  $^{13}\text{C}$  NMR (100 MHz,  $\text{CDCl}_3$ )  $\delta$  163.8, 141.0, 138.2, 133.1, 132.6, 130.3, 129.1, 129.0, 128.5, 128.0, 127.7, 127.6, 127.3, 127.1, 126.5, 126.2, 125.7, 121.2, 119.5, 114.5, 108.5, 55.7, 20.7; IR (neat): 3059, 2924, 1595, 1498, 1374, 1263, 1167, 1079, 760, 680  $\text{cm}^{-1}$ ; HRMS (ESI)  $m/z$ :  $[\text{M} + \text{Na}]^+$  Calcd for  $\text{C}_{40}\text{H}_{33}\text{NNaO}_5\text{S}$  662.1972; Found 662.1969.

**3-(2,6-dimethylphenyl)-1-(phenylsulfonyl)-4-(2,4,5-triphenyl-1,3-dioxol-2-yl)-1H-pyrrole (3f)**

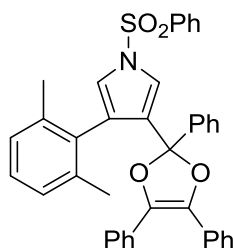

**3f**

Compound **3f** was prepared in 66% yield (40.2 mg) according to the general procedure. The product was isolated through silica gel column chromatography (PE:EA = 25:1) as a

white solid (mp 150–152 °C).  $^1\text{H}$  NMR (400 MHz,  $\text{CDCl}_3$ )  $\delta$  7.81 (d,  $J = 7.6$  Hz, 2H), 7.63 – 7.56 (m, 1H), 7.53 – 7.46 (m, 2H), 7.41 (d,  $J = 6.8$  Hz, 2H), 7.32 – 7.17 (m, 13H), 7.12 (d,  $J = 2.0$  Hz, 1H), 7.01 – 6.89 (m, 2H), 6.81 (d,  $J = 7.6$  Hz, 2H), 1.80 (s, 6H);  $^{13}\text{C}$  NMR (100 MHz,  $\text{CDCl}_3$ )  $\delta$  140.9, 138.8, 138.1, 133.9, 133.1, 132.4, 129.5, 129.3, 129.0, 128.5, 128.0, 127.8, 127.7, 127.5, 127.3, 126.6, 126.5, 126.2, 125.7, 121.4, 119.7, 108.4, 20.6; IR (neat): 3060, 2922, 1448, 1376, 1260, 1184, 1176, 1079, 760, 727  $\text{cm}^{-1}$ ; HRMS (ESI)  $m/z$ :  $[\text{M} + \text{Na}]^+$  Calcd for  $\text{C}_{39}\text{H}_{31}\text{NNaO}_4\text{S}$  632.1866; Found 632.1871.

### 3-mesityl-1-(methylsulfonyl)-4-(2,4,5-triphenyl-1,3-dioxol-2-yl)-1H-pyrrole (3g)

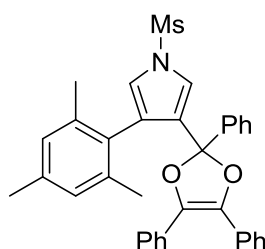

**3g**

Compound **3g** was prepared in 64% yield (35.9 mg) according to the general procedure. The product was isolated through silica gel column chromatography (PE:EA = 15:1) as a white oil.  $^1\text{H}$  NMR (400 MHz,  $\text{CDCl}_3$ )  $\delta$  7.49 (d,  $J = 6.8$  Hz, 2H), 7.31 – 7.20 (m, 13H), 7.04 (d,  $J = 2.4$  Hz, 1H), 6.88 (d,  $J = 2.4$  Hz, 1H), 6.66 (s, 2H), 3.17 (s, 3H), 2.17 (s, 3H), 1.92 (s, 6H);  $^{13}\text{C}$  NMR (100 MHz,  $\text{CDCl}_3$ )  $\delta$  141.1, 137.9, 136.8, 133.1, 129.4, 129.1, 128.6, 128.0, 127.7, 127.4, 127.1, 126.2, 125.7, 120.7, 119.1, 108.5, 42.8, 21.0, 20.7; IR (neat): 3026, 2926, 1448, 1370, 1261, 1173, 1084, 1024, 760, 694  $\text{cm}^{-1}$ ; HRMS (ESI)  $m/z$ :  $[\text{M} + \text{Na}]^+$  Calcd for  $\text{C}_{35}\text{H}_{31}\text{NNaO}_4\text{S}$  584.1866; Found 584.1868.

### 3-(4-fluoro-2,6-dimethylphenyl)-1-(methylsulfonyl)-4-(2,4,5-triphenyl-1,3-dioxol-2-yl)-1H-pyrrole (3h)

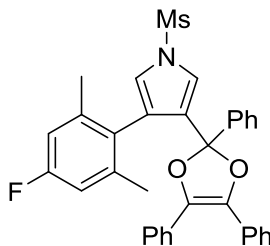





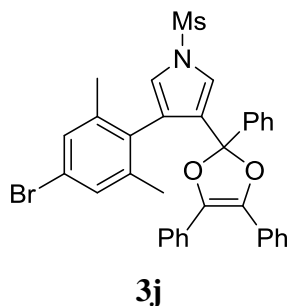

Compound **3j** was prepared in 85% yield (53.3 mg) according to the general procedure. The product was isolated through silica gel column chromatography (PE:EA = 15:1) as a white solid (mp 188–190 °C). <sup>1</sup>H NMR (400 MHz, CDCl<sub>3</sub>) δ 7.54 – 7.49 (m, 2H), 7.33 – 7.21 (m, 13H), 7.03 (d, *J* = 2.4 Hz, 1H), 6.97 (s, 2H), 6.89 (d, *J* = 2.4 Hz, 1H), 3.17 (s, 3H), 1.94 (s, 6H); <sup>13</sup>C NMR (100 MHz, CDCl<sub>3</sub>) δ 141.0, 140.5, 133.2, 131.7, 129.4, 129.2, 129.0, 128.8, 128.2, 128.0, 127.9, 126.2, 126.0, 125.7, 121.3, 121.1, 119.1, 108.4, 43.0, 20.8; IR (neat): 3056, 2927, 1371, 1264, 1175, 1120, 1083, 1024, 751, 739 cm<sup>-1</sup>; HRMS (ESI) *m/z*: [M + Na]<sup>+</sup> Calcd for C<sub>34</sub>H<sub>28</sub>BrNNaO<sub>4</sub>S 648.0815; Found 648.0822.

**3-(2-chlorophenyl)-1-(methylsulfonyl)-4-(2,4,5-triphenyl-1,3-dioxol-2-yl)-1*H*-pyrrole (3k)**

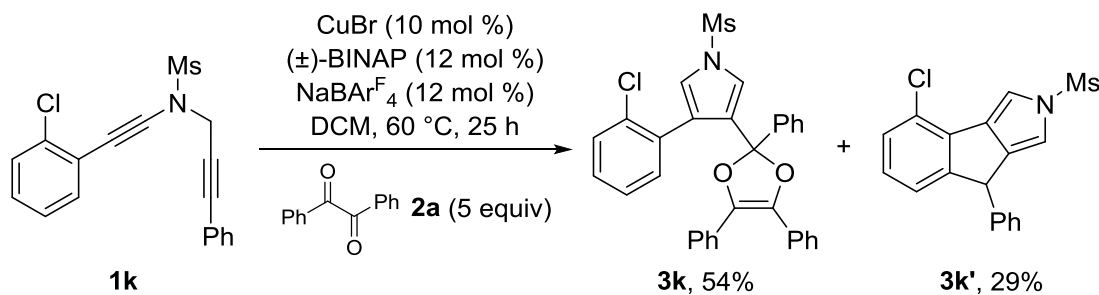

Compound **3k** was prepared in 54% yield (29.9 mg) according to the general procedure. The product was isolated through silica gel column chromatography (PE:EA = 15:1) as a white solid (mp 88–90 °C). <sup>1</sup>H NMR (400 MHz, CDCl<sub>3</sub>) δ 7.59 – 7.50 (m, 2H), 7.36 – 7.20 (m, 15H), 7.12 (d, *J* = 2.4 Hz, 1H), 7.10 – 7.04 (m, 1H), 7.01 (d, *J* = 2.4 Hz, 1H), 7.01 – 6.96 (m, 1H), 3.18 (s, 3H); <sup>13</sup>C NMR (100 MHz, CDCl<sub>3</sub>) δ 140.7, 134.4, 133.2, 132.9, 132.2, 129.3, 129.1, 128.8, 128.7, 128.6, 128.1, 127.9, 127.8, 126.3, 125.8, 125.6, 120.8, 120.4, 108.6, 43.0; IR (neat): 3056, 2927, 1371, 1264, 1175, 1097, 1063, 1023, 755, 738 cm<sup>-1</sup>; HRMS (ESI) *m/z*: [M + Na]<sup>+</sup> Calcd for C<sub>32</sub>H<sub>24</sub>ClNNaO<sub>4</sub>S 576.1007;

Found 576.0996.

**3-cyclopropyl-1-(methylsulfonyl)-4-(2,4,5-triphenyl-1,3-dioxol-2-yl)-1H-pyrrole (3l)**

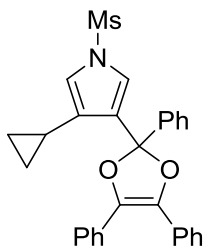

**3l**

Compound **3l** was prepared in 77% yield (37.2 mg) according to the general procedure. The product was isolated through silica gel column chromatography (PE:EA = 15:1) as a white solid (mp 71–73 °C). <sup>1</sup>H NMR (400 MHz, CDCl<sub>3</sub>) δ 7.75 – 7.68 (m, 2H), 7.59 – 7.53 (m, 4H), 7.43 – 7.36 (m, 3H), 7.32 – 7.24 (m, 6H), 6.89 (d, *J* = 2.4 Hz, 1H), 6.74 (d, *J* = 1.6 Hz, 1H), 3.09 (s, 3H), 1.81 – 1.72 (m, 1H), 0.72 – 0.66 (m, 2H), 0.50 – 0.44 (m, 2H); <sup>13</sup>C NMR (100 MHz, CDCl<sub>3</sub>) δ 140.7, 133.6, 131.1, 129.6, 129.3, 128.9, 128.3, 128.1, 128.0, 126.3, 126.2, 120.8, 117.1, 109.2, 42.8, 7.3, 6.7; IR (neat): 3057, 2929, 1369, 1263, 1172, 1087, 1061, 1025, 753, 696 cm<sup>-1</sup>; HRMS (ESI) *m/z*: [M + Na]<sup>+</sup> Calcd for C<sub>29</sub>H<sub>25</sub>NNaO<sub>4</sub>S 506.1397; Found 506.1392.

**3-(2,6-dimethylphenyl)-4-(2-(4-fluorophenyl)-4,5-diphenyl-1,3-dioxol-2-yl)-1-(methylsulfonyl)-1H-pyrrole (3m)**

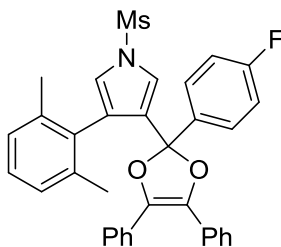

**3m**

Compound **3m** was prepared in 88% yield (49.8 mg) according to the general procedure. The product was isolated through silica gel column chromatography (PE:EA = 15:1) as a white solid (mp 152–154 °C). <sup>1</sup>H NMR (400 MHz, CDCl<sub>3</sub>) δ 7.42 (dd, *J* = 8.8, 5.6 Hz, 2H), 7.32 – 7.19 (m, 10H), 7.13 (d, *J* = 2.4 Hz, 1H), 7.04 – 6.97 (m, 1H), 6.97 – 6.83 (m,

5H), 3.19 (s, 3H), 1.94 (s, 6H);  $^{13}\text{C}$  NMR (100 MHz,  $\text{CDCl}_3$ )  $\delta$  162.9 (d,  $J = 246.0$  Hz), 138.1, 136.9 (d,  $J = 3.0$  Hz), 133.1, 132.2, 128.9(2), 128.9(0), 128.1, 127.9, 127.6 (d,  $J = 9.0$  Hz), 127.5, 126.9, 126.6, 126.2, 120.5, 119.1, 114.6 (d,  $J = 21.0$  Hz), 108.1, 42.9, 20.8;  $^{19}\text{F}$  NMR (376 MHz,  $\text{CDCl}_3$ )  $\delta$  -113.4; IR (neat): 3056, 2926, 1371, 1264, 1222, 1175, 1107, 1079, 760, 738  $\text{cm}^{-1}$ ; HRMS (ESI)  $m/z$ :  $[\text{M} + \text{Na}]^+$  Calcd for  $\text{C}_{34}\text{H}_{28}\text{FNNaO}_4\text{S}$  588.1615; Found 588.1612.

**3-(2-(4-chlorophenyl)-4,5-diphenyl-1,3-dioxol-2-yl)-4-(2,6-dimethylphenyl)-1-(methylsulfonyl)-1H-pyrrole (3n)**

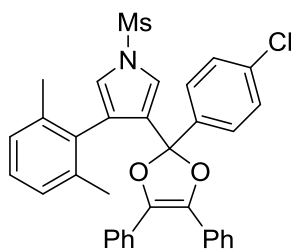

**3n**

Compound **3n** was prepared in 79% yield (46.0 mg) according to the general procedure. The product was isolated through silica gel column chromatography (PE:EA = 15:1) as a colourless oil.  $^1\text{H}$  NMR (400 MHz,  $\text{CDCl}_3$ )  $\delta$  7.39 (d,  $J = 8.4$  Hz, 2H), 7.30 – 7.20 (m, 12H), 7.11 (d,  $J = 2.4$  Hz, 1H), 7.04 – 6.98 (m, 1H), 6.92 (d,  $J = 2.4$  Hz, 1H), 6.87 (d,  $J = 7.6$  Hz, 2H), 3.19 (s, 3H), 1.95 (s, 6H);  $^{13}\text{C}$  NMR (100 MHz,  $\text{CDCl}_3$ )  $\delta$  139.7, 138.1, 134.5, 133.2, 132.2, 128.8, 128.6, 128.1, 128.0, 127.9, 127.5, 127.2, 126.9, 126.7, 126.2, 120.6, 119.1, 108.0, 42.9, 20.8; IR (neat): 3056, 2927, 1371, 1263, 1214, 1175, 1107, 1080,  $\text{cm}^{-1}$ ; HRMS (ESI)  $m/z$ :  $[\text{M} + \text{Na}]^+$  Calcd for  $\text{C}_{34}\text{H}_{28}\text{ClNNaO}_4\text{S}$  604.1320; Found 604.1325.

**3-(2-(4-bromophenyl)-4,5-diphenyl-1,3-dioxol-2-yl)-4-(2,6-dimethylphenyl)-1-(methylsulfonyl)-1H-pyrrole (3o)**

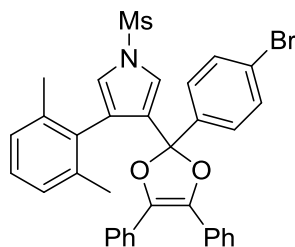

**3o**

Compound **3o** was prepared in 77% yield (48.2 mg) according to the general procedure. The product was isolated through silica gel column chromatography (PE:EA = 15:1) as a white solid (mp 179–181 °C). <sup>1</sup>H NMR (400 MHz, CDCl<sub>3</sub>) δ 7.38 (d, *J* = 8.6 Hz, 2H), 7.33 (d, *J* = 8.6 Hz, 2H), 7.30 – 7.20 (m, 10H), 7.11 (d, *J* = 2.4 Hz, 1H), 7.04 – 6.98 (m, 1H), 6.91 (d, *J* = 2.4 Hz, 1H), 6.87 (d, *J* = 7.6 Hz, 2H), 3.19 (s, 3H), 1.95 (s, 6H); <sup>13</sup>C NMR (100 MHz, CDCl<sub>3</sub>) δ 140.2, 138.1, 133.2, 132.2, 130.9, 128.8, 128.5, 128.1, 128.0, 127.5, 127.4, 126.8, 126.7, 126.2, 122.8, 120.6, 119.1, 108.0, 42.9, 20.8; IR (neat): 3056, 2926, 1371, 1263, 1214, 1175, 1107, 1080, 770, 738 cm<sup>-1</sup>; HRMS (ESI) *m/z*: [M + Na]<sup>+</sup> Calcd for C<sub>34</sub>H<sub>28</sub>BrNNaO<sub>4</sub>S 648.0815; Found 648.0801.

**3-(2,6-dimethylphenyl)-4-(4,5-diphenyl-2-(*p*-tolyl)-1,3-dioxol-2-yl)-1-(methylsulfonyl)-1*H*-pyrrole (3p)**

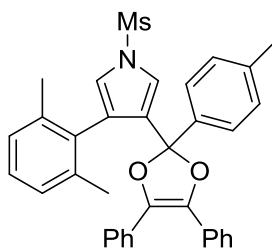

**3p**

Compound **3p** was prepared in 85% yield (47.7 mg) according to the general procedure. The product was isolated through silica gel column chromatography (PE:EA = 15:1) as a white solid (mp 176–178 °C). <sup>1</sup>H NMR (400 MHz, CDCl<sub>3</sub>) δ 7.40 (d, *J* = 7.2 Hz, 2H), 7.28 – 7.18 (m, 10H), 7.09 (d, *J* = 7.2 Hz, 2H), 7.03 – 6.95 (m, 2H), 6.93 – 6.82 (m, 3H), 3.17 (s, 3H), 2.34 (s, 3H), 1.99 (s, 6H); <sup>13</sup>C NMR (100 MHz, CDCl<sub>3</sub>) δ 138.4, 138.2, 138.1, 133.1, 132.5, 129.4, 129.1, 128.4, 127.9, 127.7, 127.3, 127.2, 126.6, 126.2, 125.6, 121.0, 118.9, 108.5, 42.8, 21.2, 20.9; IR (neat): 3056, 2925, 1371, 1263, 1219, 1176,

1107, 1079, 769, 693  $\text{cm}^{-1}$ ; HRMS (ESI)  $m/z$ :  $[M + \text{Na}]^+$  Calcd for  $\text{C}_{35}\text{H}_{31}\text{NNaO}_4\text{S}$  584.1866; Found 584.1871.

**3-(2,6-dimethylphenyl)-4-(2-(4-methoxyphenyl)-4,5-diphenyl-1,3-dioxol-2-yl)-1-(methylsulfonyl)-1H-pyrrole (3q)**

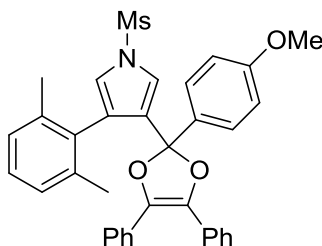

**3q**

Compound **3q** was prepared in 66% yield (38.1 mg) according to the general procedure. The product was isolated through silica gel column chromatography (PE:EA = 15:1) as a white solid (mp 150–152 °C).  $^1\text{H}$  NMR (400 MHz,  $\text{CDCl}_3$ )  $\delta$  7.41 (d,  $J$  = 8.8 Hz, 2H), 7.30 – 7.19 (m, 10H), 7.05 (d,  $J$  = 2.4 Hz, 1H), 7.02 – 6.96 (m, 1H), 6.90 (d,  $J$  = 2.4 Hz, 1H), 6.86 (d,  $J$  = 7.6 Hz, 2H), 6.80 (d,  $J$  = 8.8 Hz, 2H), 3.79 (s, 3H), 3.17 (s, 3H), 1.97 (s, 6H);  $^{13}\text{C}$  NMR (100 MHz,  $\text{CDCl}_3$ )  $\delta$  159.8, 138.1, 133.3, 133.1, 132.5, 129.5, 129.2, 128.0, 127.7, 127.3, 127.1, 127.0, 126.6, 126.2, 120.8, 119.0, 113.1, 108.5, 55.3, 42.8, 20.9; IR (neat): 3055, 2927, 1370, 1264, 1216, 1173, 1106, 1079, 759, 739  $\text{cm}^{-1}$ ; HRMS (ESI)  $m/z$ :  $[M + \text{Na}]^+$  Calcd for  $\text{C}_{35}\text{H}_{31}\text{NNaO}_5\text{S}$  600.1815; Found 600.1814.

**3-(2-(3-bromophenyl)-4,5-diphenyl-1,3-dioxol-2-yl)-4-(2,6-dimethylphenyl)-1-(methylsulfonyl)-1H-pyrrole (3r)**

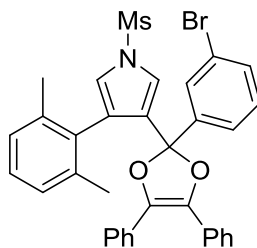

**3r**

Compound **3r** was prepared in 54% yield (33.8 mg) according to the general procedure. The product was isolated through silica gel column chromatography (PE:EA = 15:1) as a colourless oil.  $^1\text{H}$  NMR (400 MHz,  $\text{CDCl}_3$ )  $\delta$  7.54 – 7.49 (m, 1H), 7.44 – 7.36 (m, 2H), 7.34 – 7.28 (m, 4H), 7.26 – 7.21 (m, 6H), 7.16 (d,  $J = 2.4$  Hz, 1H), 7.14 – 7.09 (m, 1H), 7.06 – 7.00 (m, 1H), 6.91 (d,  $J = 2.4$  Hz, 1H), 6.88 (d,  $J = 7.6$  Hz, 2H), 3.19 (s, 3H), 1.93 (s, 6H);  $^{13}\text{C}$  NMR (100 MHz,  $\text{CDCl}_3$ )  $\delta$  143.5, 138.1, 133.2, 132.0, 131.7, 129.4, 128.8, 128.7, 128.5, 128.1, 128.0, 127.6, 126.8, 126.7, 126.3, 124.4, 122.0, 120.5, 119.2, 107.6, 42.9, 20.8; IR (neat): 3055, 2927, 1371, 1264, 1216, 1173, 1106, 1079, 769, 738  $\text{cm}^{-1}$ ; HRMS (ESI)  $m/z$ :  $[\text{M} + \text{Na}]^+$  Calcd for  $\text{C}_{34}\text{H}_{28}\text{BrNNaO}_4\text{S}$  648.0815; Found 648.0822.

**3-(2,6-dimethylphenyl)-4-(4,5-diphenyl-2-(*m*-tolyl)-1,3-dioxol-2-yl)-1-(methylsulfonyl)-1H-pyrrole (3s)**

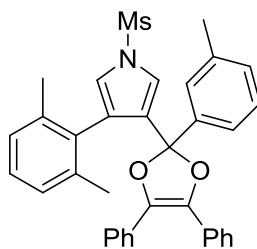

**3s**

Compound **3s** was prepared in 83% yield (46.6 mg) according to the general procedure. The product was isolated through silica gel column chromatography (PE:EA = 15:1) as a white solid (mp 167–169 °C).  $^1\text{H}$  NMR (400 MHz,  $\text{CDCl}_3$ )  $\delta$  7.34 – 7.27 (m, 5H), 7.24 – 7.18 (m, 7H), 7.18 – 7.13 (m, 1H), 7.12 – 7.07 (m, 2H), 7.03 – 6.97 (m, 1H), 6.89 (d,  $J = 2.4$  Hz, 1H), 6.86 (d,  $J = 7.2$  Hz, 2H), 3.17 (s, 3H), 2.28 (s, 3H), 1.94 (s, 6H);  $^{13}\text{C}$  NMR (100 MHz,  $\text{CDCl}_3$ )  $\delta$  141.0, 138.2, 137.3, 133.2, 132.4, 129.4, 129.3, 129.2, 128.0, 127.8, 127.6, 127.4, 127.0, 126.6, 126.3, 126.2, 122.9, 120.7, 119.0, 108.5, 42.8, 21.5, 20.8; IR (neat): 3056, 2925, 1371, 1264, 1175, 1107, 1080, 1024, 769, 738  $\text{cm}^{-1}$ ; HRMS (ESI)  $m/z$ :  $[\text{M} + \text{Na}]^+$  Calcd for  $\text{C}_{35}\text{H}_{31}\text{NNaO}_4\text{S}$  584.1866; Found 584.1870.

**3-(2-(2-bromophenyl)-4,5-diphenyl-1,3-dioxol-2-yl)-4-(2,6-dimethylphenyl)-1-(methylsulfonyl)-1H-pyrrole (3t)**

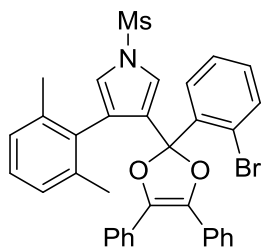

**3t**

Compound **3t** was prepared in 46% yield (28.8 mg) according to the general procedure. The product was isolated through silica gel column chromatography (PE:EA = 15:1) as a white solid (mp 199–201 °C). <sup>1</sup>H NMR (400 MHz, CDCl<sub>3</sub>) δ 7.59 (dd, *J* = 7.6, 1.2 Hz, 1H), 7.47 (dd, *J* = 7.6, 2.0 Hz, 1H), 7.37 – 7.30 (m, 4H), 7.27 – 7.21 (m, 6H), 7.19 – 7.09 (m, 3H), 6.97 – 6.91 (m, 2H), 6.79 (d, *J* = 7.6 Hz, 2H), 3.18 (s, 3H), 2.03 (s, 6H); <sup>13</sup>C NMR (100 MHz, CDCl<sub>3</sub>) δ 139.0, 138.2, 134.7, 133.2, 132.1, 130.3, 128.8, 128.1, 127.9, 127.8, 127.3, 127.2, 126.8, 126.7, 126.6, 126.3, 122.2, 121.3, 119.0, 108.0, 42.9, 20.9; IR (neat): 3055, 2926, 1371, 1265, 1175, 1106, 1081, 1024, 756, 739 cm<sup>-1</sup>; HRMS (ESI) *m/z*: [M + Na]<sup>+</sup> Calcd for C<sub>34</sub>H<sub>28</sub>BrNNaO<sub>4</sub>S 648.0815; Found 648.0816.

**3-(2,6-dimethylphenyl)-4-(4,5-diphenyl-2-(*o*-tolyl)-1,3-dioxol-2-yl)-1-(methylsulfonyl)-1H-pyrrole (3u)**

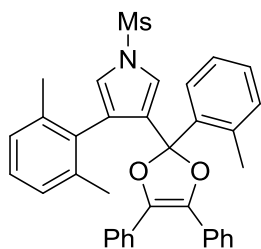

**3u**

Compound **3u** was prepared in 47% yield (26.4 mg) according to the general procedure. The product was isolated through silica gel column chromatography (PE:EA = 15:1) as a white solid (mp 227–229 °C). <sup>1</sup>H NMR (400 MHz, CDCl<sub>3</sub>) δ 7.52 (d, *J* = 7.6 Hz, 1H), 7.30 – 7.24 (m, 5H), 7.23 – 7.14 (m, 7H), 7.09 – 7.03 (m, 1H), 6.99 – 6.90 (m, 3H), 6.81 (d, *J* = 7.6 Hz, 2H), 3.16 (s, 3H), 2.47 (s, 3H), 2.02 (s, 6H); <sup>13</sup>C NMR (100 MHz, CDCl<sub>3</sub>) δ 138.4, 138.0, 136.3, 133.0, 132.4, 131.7, 129.1, 128.8, 128.5, 128.0, 127.7, 127.4, 127.3, 126.7, 126.3, 125.7, 125.1, 121.2, 119.2, 108.9, 42.8, 21.1, 20.9; IR (neat): 3056, 2926,



1371, 1264, 1175, 1105, 1077, 1024, 758, 692  $\text{cm}^{-1}$ ; HRMS (ESI)  $m/z$ :  $[\text{M} + \text{Na}]^+$  Calcd for  $\text{C}_{35}\text{H}_{31}\text{NNaO}_4\text{S}$  584.1866; Found 584.1869.

**3-(2,6-dimethylphenyl)-4-(4,5-diphenyl-2-(thiophen-3-yl)-1,3-dioxol-2-yl)-1-(methylsulfonyl)-1H-pyrrole (3v)**

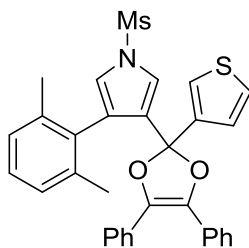

**3v**

Compound **3v** was prepared in 75% yield (41.5 mg) according to the general procedure. The product was isolated through silica gel column chromatography (PE:EA = 15:1) as a white solid (mp 151–153 °C).  $^1\text{H}$  NMR (400 MHz,  $\text{CDCl}_3$ )  $\delta$  7.30 – 7.25 (m, 4H), 7.24 – 7.17 (m, 9H), 7.12 (dd,  $J = 4.4, 2.0$  Hz, 1H), 7.03 – 6.97 (m, 1H), 6.92 (d,  $J = 2.4$  Hz, 1H), 6.87 (d,  $J = 7.6$  Hz, 2H), 3.19 (s, 3H), 1.98 (s, 6H);  $^{13}\text{C}$  NMR (100 MHz,  $\text{CDCl}_3$ )  $\delta$  142.6, 138.2, 133.1, 132.4, 129.0, 128.6, 128.0, 127.8, 127.4, 126.9, 126.6, 126.3, 126.1, 125.7, 123.0, 120.6, 119.1, 107.2, 42.9, 20.8; IR (neat): 3055, 2926, 1371, 1264, 1175, 1106, 1078, 1024, 762, 738  $\text{cm}^{-1}$ ; HRMS (ESI)  $m/z$ :  $[\text{M} + \text{Na}]^+$  Calcd for  $\text{C}_{32}\text{H}_{27}\text{NNaO}_4\text{S}_2$  576.1274; Found 576.1280.

**3-(2,6-dimethylphenyl)-4-(4,5-diphenyl-2-(thiophen-2-yl)-1,3-dioxol-2-yl)-1-(methylsulfonyl)-1H-pyrrole (3w)**

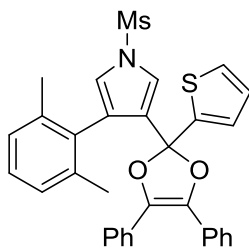

**3w**

Compound **3w** was prepared in 66% yield (36.5 mg) according to the general procedure. The product was isolated through silica gel column chromatography (PE:EA = 15:1) as a

white solid (mp 168–170 °C).  $^1\text{H}$  NMR (400 MHz,  $\text{CDCl}_3$ )  $^1\text{H}$  NMR (400 MHz,  $\text{CDCl}_3$ )  $\delta$  7.29 – 7.18 (m, 12H), 7.12 (dd,  $J = 3.6, 1.2$  Hz, 1H), 7.01 – 6.92 (m, 3H), 6.86 (d,  $J = 7.6$  Hz, 2H), 3.19 (s, 3H), 2.03 (s, 6H);  $^{13}\text{C}$  NMR (100 MHz,  $\text{CDCl}_3$ )  $\delta$  144.9, 138.1, 133.2, 132.4, 128.8, 128.5, 128.0, 127.9, 127.4, 127.1, 126.7, 126.6, 126.4, 125.7(3), 125.7(1), 121.4, 119.1, 107.0, 42.9, 20.9; IR (neat): 3056, 2923, 1370, 1263, 1175, 1106, 1077, 1023, 770, 759  $\text{cm}^{-1}$ ; HRMS (ESI)  $m/z$ :  $[\text{M} + \text{Na}]^+$  Calcd for  $\text{C}_{32}\text{H}_{27}\text{NNaO}_4\text{S}_2$  576.1274; Found 576.1284.

**3-(2,6-dimethylphenyl)-4-(2,4-diphenyl-5-(thiophen-2-yl)-1,3-dioxol-2-yl)-1-(methylsulfonyl)-1H-pyrrole (3x)**

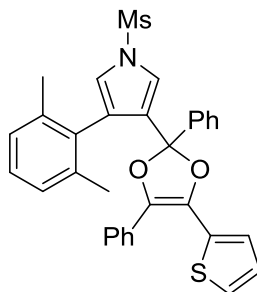

**3x**

Compound **3x** was prepared in 64% yield (35.4 mg) according to the general procedure. The product was isolated through silica gel column chromatography (PE:EA = 15:1) as a colourless oil.  $^1\text{H}$  NMR (400 MHz,  $\text{CDCl}_3$ )  $\delta$  7.49 – 7.45 (m, 2H), 7.39 – 7.35 (m, 2H), 7.30 – 7.18 (m, 7H), 7.08 – 6.98 (m, 3H), 6.94 – 6.83 (m, 4H), 3.17 (s, 3H), 1.97 (s, 3H), 1.95 (s, 3H);  $^{13}\text{C}$  NMR (100 MHz,  $\text{CDCl}_3$ )  $\delta$  140.7, 138.2, 138.1, 133.2, 132.3, 130.6, 128.9, 128.7, 128.6, 128.5, 128.0, 127.9, 127.8, 127.4, 127.0, 126.9, 126.6, 126.5, 126.1, 125.7, 125.1, 125.0, 120.8, 119.0, 108.8, 42.9, 20.8(3), 20.8(1); IR (neat): 3057, 2925, 1654, 1410, 1265, 1213, 1175, 1076, 772, 739  $\text{cm}^{-1}$ ; HRMS (ESI)  $m/z$ :  $[\text{M} + \text{Na}]^+$  Calcd for  $\text{C}_{32}\text{H}_{27}\text{NNaO}_4\text{S}_2$  576.1274; Found 576.1284.

**3-(2,6-dimethylphenyl)-4-(4-(2-isopropylphenyl)-2,5-diphenyl-1,3-dioxol-2-yl)-1-(methylsulfonyl)-1H-pyrrole (3y)**

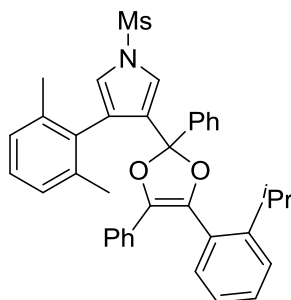

**3y**

Compound **3y** was prepared in 68% yield (40.1 mg) according to the general procedure. The product was isolated through silica gel column chromatography (PE:EA = 15:1) as a white solid (mp 79–81 °C). <sup>1</sup>H NMR (400 MHz, CDCl<sub>3</sub>) δ 7.47 – 7.41 (m, 2H), 7.39 – 7.33 (m, 1H), 7.32 – 7.23 (m, 4H), 7.17 – 6.97 (m, 9H), 6.93 – 6.83 (m, 3H), 3.18 (s, 3H), 2.76 – 2.64 (m, 1H), 2.03 (s, 3H), 1.88 (s, 3H), 0.95 (d, *J* = 6.8 Hz, 3H), 0.83 (d, *J* = 6.8 Hz, 3H); <sup>13</sup>C NMR (100 MHz, CDCl<sub>3</sub>) δ 149.7, 141.0, 138.4, 138.3, 133.6, 133.1, 132.5, 131.3, 130.0, 129.0, 128.9, 128.5, 127.9, 127.5, 127.4, 127.2, 127.0, 126.7, 126.6, 126.5, 125.9, 125.8, 125.7, 123.9, 120.8, 119.1, 109.0, 42.8, 29.8, 23.9, 23.6, 21.0, 20.6; IR (neat): 2962, 2927, 1371, 1264, 1176, 1107, 1078, 1024, 760, 741 cm<sup>-1</sup>; HRMS (ESI) *m/z*: [M + Na]<sup>+</sup> Calcd for C<sub>37</sub>H<sub>35</sub>NNaO<sub>4</sub>S 612.2179; Found 612.2186.

**1-((4-bromophenyl)sulfonyl)-3-(2,6-dimethylphenyl)-4-(4-(2-isopropylphenyl)-2-(4-methoxyphenyl)-5-phenyl-1,3-dioxol-2-yl)-1*H*-pyrrole (3z)**

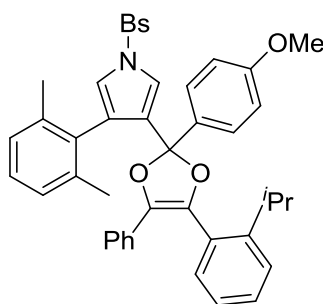

**3z**

Compound **3z** was prepared in 63% yield (47.9 mg) according to the general procedure. The product was isolated through silica gel column chromatography (PE:EA = 30:1) as a white solid (mp 86–88 °C). <sup>1</sup>H NMR (400 MHz, CDCl<sub>3</sub>) δ 7.77 – 7.59 (m, 4H), 7.43 – 7.25 (m, 4H), 7.18 – 6.72 (m, 14H), 3.79 (s, 3H), 2.78 – 2.65 (m, 1H), 1.90 (s, 3H), 1.75

(s, 3H), 0.96 (d,  $J = 6.4$  Hz, 3H), 0.85 (d,  $J = 6.4$  Hz, 3H);  $^{13}\text{C}$  NMR (100 MHz,  $\text{CDCl}_3$ )  $\delta$  159.8, 149.7, 138.3, 138.1, 138.0, 133.5, 133.1, 133.0, 132.7, 132.4, 131.3, 130.2, 129.9, 129.2, 128.9, 128.1, 127.9, 127.8, 127.4, 127.3, 127.1, 126.6, 126.5, 126.4, 125.9, 125.7, 123.8, 121.2, 119.8, 112.9, 109.0, 55.3, 29.9, 23.9, 23.6, 20.9, 20.5; IR (neat): 2961, 2926, 1391, 1379, 1252, 1185, 1176, 1076, 760, 744  $\text{cm}^{-1}$ ; HRMS (ESI)  $m/z$ :  $[\text{M} + \text{Na}]^+$  Calcd for  $\text{C}_{43}\text{H}_{38}\text{BrNNaO}_5\text{S}$  782.1546; Found 782.1550.

**1-((4-bromophenyl)sulfonyl)-3-(2,6-dimethylphenyl)-4-(2-(4-ethoxyphenyl)-4-(2-isopropylphenyl)-5-phenyl-1,3-dioxol-2-yl)-1H-pyrrole (3aa)**

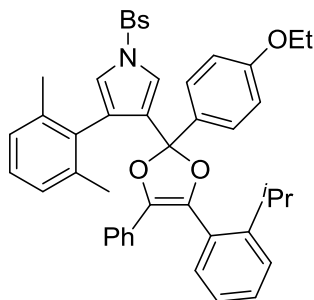

**3aa**

Compound **3aa** was prepared in 54% yield (41.8 mg) according to the general procedure. The product was isolated through silica gel column chromatography (PE:EA = 30:1) as a white solid (mp 78–80 °C).  $^1\text{H}$  NMR (400 MHz,  $\text{CDCl}_3$ )  $\delta$  7.76 – 7.61 (m, 4H), 7.38 – 7.24 (m, 4H), 7.16 (d,  $J = 2.4$  Hz, 1H), 7.13 – 6.94 (m, 8H), 6.91 (d,  $J = 2.4$  Hz, 1H), 6.87 – 6.79 (m, 2H), 6.74 (d,  $J = 8.8$  Hz, 2H), 4.02 (q,  $J = 7.2$  Hz, 2H), 2.80 – 2.65 (m, 1H), 1.90 (s, 3H), 1.74 (s, 3H), 1.41 (t,  $J = 7.2$  Hz, 3H), 0.95 (d,  $J = 6.8$  Hz, 3H), 0.85 (d,  $J = 6.8$  Hz, 3H);  $^{13}\text{C}$  NMR (100 MHz,  $\text{CDCl}_3$ )  $\delta$  159.1, 149.7, 138.3, 138.1, 138.0, 133.5, 133.0, 132.9, 132.7, 132.4, 131.3, 130.2, 129.9, 129.2, 129.0, 128.1, 127.9, 127.8, 127.4, 127.3, 127.1, 126.6, 126.5, 126.4, 125.9, 125.7, 123.8, 121.2, 119.7, 113.5, 109.1, 63.5, 29.8, 23.9, 23.6, 20.9, 20.5, 14.8; IR (neat): 2961, 2925, 1391, 1251, 1185, 1175, 1090, 1076, 759, 744  $\text{cm}^{-1}$ ; HRMS (ESI)  $m/z$ :  $[\text{M} + \text{Na}]^+$  Calcd for  $\text{C}_{44}\text{H}_{40}\text{BrNNaO}_5\text{S}$  796.1703; Found 796.1701.

**3-(4-bromo-2,6-dimethylphenyl)-4-(2-(4-methoxyphenyl)-4,5-diphenyl-1,3-dioxol-2-**

### yl)-1-tosyl-1*H*-pyrrole (3ab)

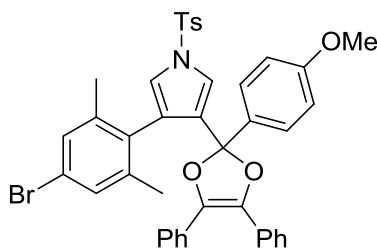

**3ab**

Compound **3ab** was prepared in 60% yield (44.0 mg) according to the general procedure. The product was isolated through silica gel column chromatography (PE:EA = 15:1) as a white solid (mp 212–214 °C). <sup>1</sup>H NMR (400 MHz, CDCl<sub>3</sub>) δ 7.70 (d, *J* = 8.0 Hz, 2H), 7.37 (d, *J* = 8.4 Hz, 2H), 7.29 (d, *J* = 8.0 Hz, 2H), 7.27 – 7.15 (m, 10H), 7.05 (d, *J* = 2.4 Hz, 1H), 6.92 (s, 2H), 6.90 (d, *J* = 2.4 Hz, 1H), 6.80 (d, *J* = 8.4 Hz, 2H), 3.80 (s, 3H), 2.42 (s, 3H), 1.82 (s, 6H); <sup>13</sup>C NMR (100 MHz, CDCl<sub>3</sub>) δ 159.9, 145.2, 140.3, 135.9, 133.1, 133.0, 131.8, 130.0, 129.4, 129.2, 129.0, 128.1, 127.8, 127.0, 126.7, 126.2, 126.1, 121.6, 121.1, 119.6, 113.1, 108.4, 55.3, 21.6, 20.6; IR (neat): 3054, 2925, 1376, 1264, 1188, 1173, 1079, 1024, 739, 704 cm<sup>-1</sup>; HRMS (ESI) *m/z*: [M + Na]<sup>+</sup> Calcd for C<sub>41</sub>H<sub>34</sub>BrNNaO<sub>5</sub>S 754.1233; Found 754.1231.

### 2.4 General procedure for the synthesis of chiral pyrrole-substituted dioxoles **3**

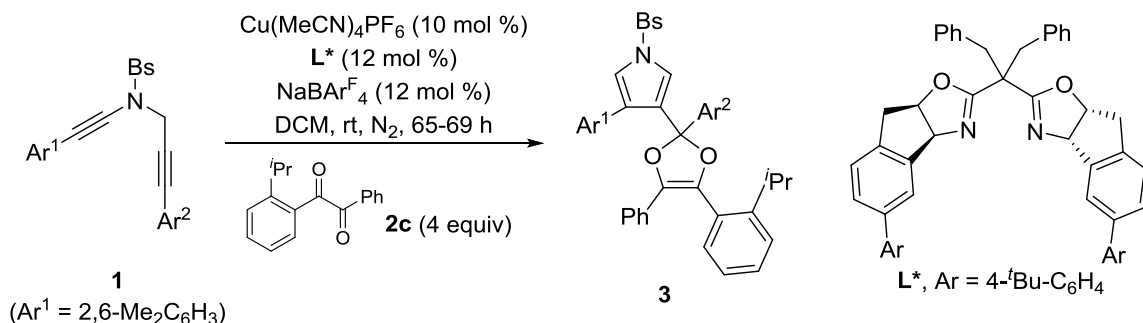

The powdered Cu(MeCN)<sub>4</sub>PF<sub>6</sub> (0.01 mmol, 3.7 mg), **L\*** (0.012 mmol, 9.3 mg), NaBARF<sub>4</sub> (0.012 mmol, 10.6 mg) were introduced into an oven-dried Schlenk tube under argon atmosphere. After DCM (1 mL) was injected to the Schlenk tube, the solution was stirred at room temperature under argon atmosphere for 2 h. Subsequently, the *N*-propargyl ynamide **1** (0.1 mmol) and diketone **2c** (0.5 mmol) in DCM (1 mL) were introduced into the system. The resulting mixture was stirred at room temperature and the progress of the

reaction was monitored by TLC. Upon completion, the mixture was concentrated and the residue was purified by flash chromatography on silica gel (eluent: hexanes/ethyl acetate) to afford the desired chiral pyrrole-substituted dioxole **3**.

Compound (+)-**3z** was prepared in 30% yield (22.8 mg) according to the above procedure. The product was isolated through silica gel column chromatography (PE:EA = 30:1) as a white solid.  $[\alpha]_D^{20} = +15.86^\circ$  ( $c = 1.0$ ,  $\text{CHCl}_3$ ). 30% ee (determined by HPLC (IB, *n*-hexane/2-propanol = 95/5, flow rate = 1.0 mL/min,  $\lambda = 254$  nm)  $t_R = 6.80$  min (minor), 7.58 min (major)).

Compound (+)-**3aa** was prepared in 36% yield (27.8 mg) according to the above procedure. The product was isolated through silica gel column chromatography (PE:EA = 30:1) as a white solid  $[\alpha]_D^{20} = +15.00^\circ$  ( $c = 1.0$ ,  $\text{CHCl}_3$ ). 29% ee (determined by HPLC (IB, *n*-hexane/2-propanol = 98/2, flow rate = 1.0 mL/min,  $\lambda = 254$  nm)  $t_R = 7.27$  min (minor), 8.19 min (major)).

## 2.5 Preparative-scale synthesis of **3a**

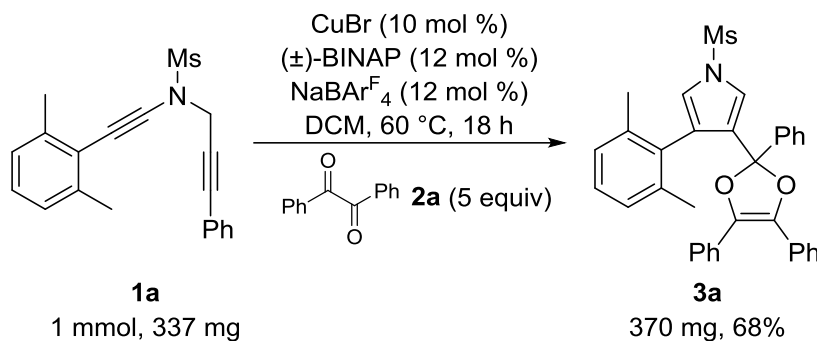

The powdered CuBr (0.1 mmol, 14.1 mg), (±)-BINAP (0.12 mmol, 74.7 mg), NaBAR<sub>4</sub><sup>F</sup> (0.12 mmol, 106.3 mg) were introduced into the Schlenk tubes. After DCM (25 mL) was added to the Schlenk tubes, the solution was stirred at 60 °C for 0.5 h. Subsequently, the *N*-propargyl ynamide **1a** (1.0 mmol, 337 mg) and diketone **2a** (5.0 mmol) in DCE (25 mL) were introduced into the system. The resulting mixture was stirred at 60 °C and the progress of the reaction was monitored by TLC. Upon completion, the mixture was concentrated and the residue was purified by flash chromatography on silica gel (PE:EA = 15:1) to afford the desired product **3a** (370 mg, 68% yield).

## 2.6 Transformations

### 3-(2,6-dimethylphenyl)-4-(2,4,5-triphenyl-1,3-dioxol-2-yl)-1H-pyrrole (4a)

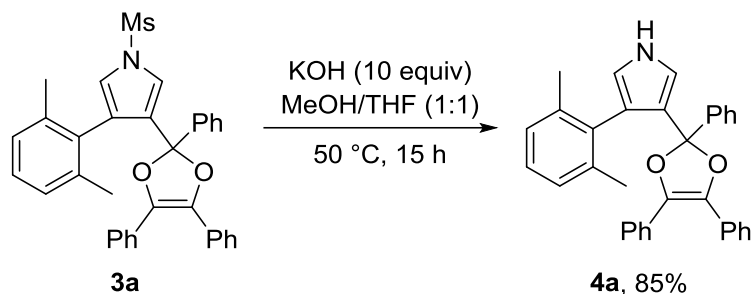

Compound **4a** was prepared in 85% yield (39.9 mg) according to the above known procedure (0.1 mmol scale).<sup>5</sup> The product was isolated through silica gel column chromatography (PE:EA = 10:1) as a colourless oil. <sup>1</sup>H NMR (400 MHz, CDCl<sub>3</sub>) δ 8.11 (s, 1H), 7.61 – 7.52 (m, 2H), 7.33 – 7.23 (m, 7H), 7.22 – 7.13 (m, 6H), 6.99 – 6.91 (m, 1H), 6.85 (d, *J* = 7.6 Hz, 2H), 6.61 – 6.56 (m, 1H), 6.53 – 6.46 (m, 1H), 2.01 (s, 6H); <sup>13</sup>C NMR (100 MHz, CDCl<sub>3</sub>) δ 142.7, 138.7, 135.2, 133.1, 129.7, 128.0, 127.9, 127.4, 127.3, 126.5, 126.3(2), 126.3(1), 125.8, 123.4, 122.2, 119.1, 116.9, 109.8, 21.0; IR (neat): 3432, 3057, 2922, 1447, 1264, 1101, 1072, 1024, 758, 749 cm<sup>-1</sup>; HRMS (ESI) *m/z*: [M + Na]<sup>+</sup> Calcd for C<sub>33</sub>H<sub>27</sub>NNaO<sub>2</sub> 492.1934; Found 492.1943.

### (±)-2-(2,6-dimethylphenyl)-9-(methylsulfonyl)-3-(2,4,5-triphenyl-1,3-dioxol-2-yl)-1,4-dihydro-1,4-epiminonaphthalene (4b)

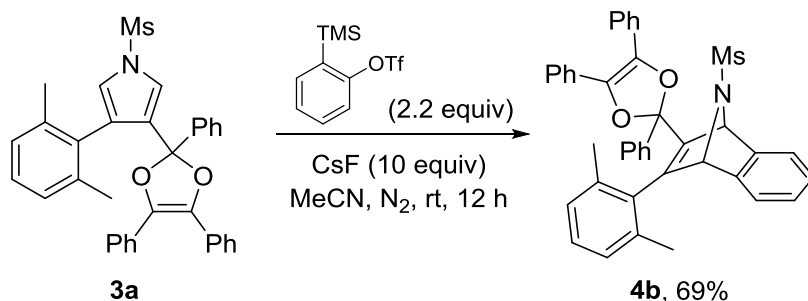

Compound **4b** was prepared in 69% yield (43.0 mg) according to the above known procedure (0.1 mmol scale).<sup>6</sup> The product was isolated through silica gel column chromatography (PE:EA = 5:1) as pale yellow solid (mp 200–202 °C). <sup>1</sup>H NMR (400 MHz, CDCl<sub>3</sub>) δ 7.52 – 7.46 (m, 2H), 7.37 – 7.23 (m, 9H), 7.18 (s, 5H), 7.05 – 6.96 (m,

3H), 6.90 – 6.85 (m, 1H), 6.80 (d,  $J = 7.6$  Hz, 1H), 6.70 (d,  $J = 7.6$  Hz, 1H), 5.66 (d,  $J = 1.6$  Hz, 1H), 5.25 (d,  $J = 1.6$  Hz, 1H), 2.29 (s, 3H), 2.08 (s, 3H), 1.54 (s, 3H);  $^{13}\text{C}$  NMR (100 MHz,  $\text{CDCl}_3$ )  $\delta$  152.3, 147.7, 147.6, 146.6, 138.4, 136.5, 135.0, 133.5, 133.4, 132.9, 129.1, 128.8, 128.5, 128.2, 128.0(8), 128.0(3), 128.0(0), 127.9, 127.6, 127.0, 126.9, 126.4, 126.2, 126.0, 125.5, 122.1, 121.9, 109.3, 72.8, 68.9, 38.0, 20.6, 20.1; IR (neat): 3057, 2925, 1449, 1341, 1264, 1154, 1069, 1025, 760, 740  $\text{cm}^{-1}$ ; HRMS (ESI)  $m/z$ :  $[\text{M} + \text{Na}]^+$  Calcd for  $\text{C}_{40}\text{H}_{33}\text{NNaO}_4\text{S}$  646.2023; Found 646.2038.

## 2.7 Control experiments

### (4-(2,6-dimethylphenyl)-1-(methylsulfonyl)-1*H*-pyrrol-3-yl)(phenyl)methanone (3a')

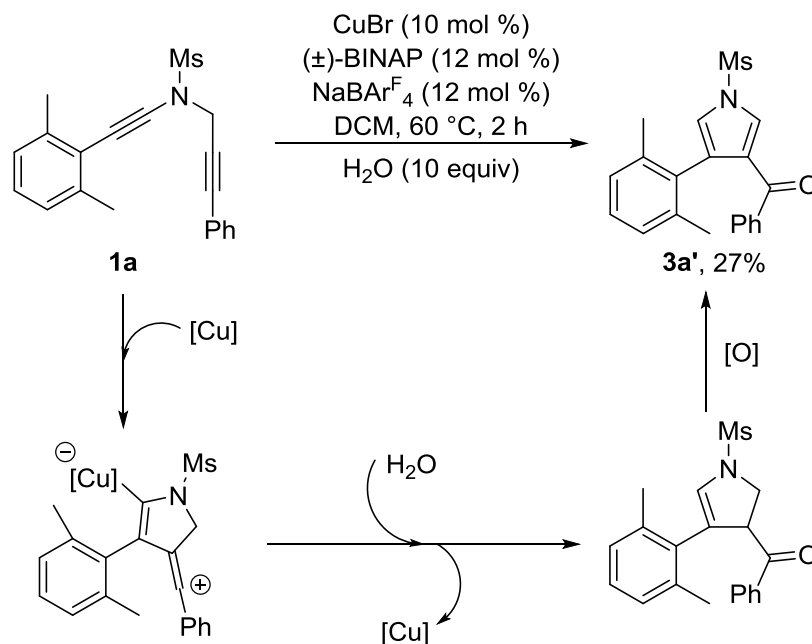

Compound **3a'** was prepared in 27% yield (9.5 mg) according to the general procedure (0.1 mmol scale).  $^1\text{H}$  NMR (400 MHz,  $\text{CDCl}_3$ )  $\delta$  7.78 (d,  $J = 7.2$  Hz, 2H), 7.60 (d,  $J = 2.0$  Hz, 1H), 7.56 – 7.50 (m, 1H), 7.45 – 7.37 (m, 2H), 7.15 – 7.10 (m, 1H), 7.08 – 7.01 (m, 3H), 3.27 (s, 3H), 2.11 (s, 6H).  $^{13}\text{C}$  NMR (100 MHz,  $\text{CDCl}_3$ )  $\delta$  189.7, 138.3, 137.0, 132.5, 132.2, 129.1, 128.4, 128.1, 127.6, 127.1, 127.0, 126.2, 119.4, 43.1, 20.9. IR (neat): 2924, 2852, 1652, 1508, 1369, 1275, 1174, 1069, 802, 766  $\text{cm}^{-1}$ ; HRMS (ESI)  $m/z$ :  $[\text{M} + \text{Na}]^+$  Calcd for  $\text{C}_{20}\text{H}_{19}\text{NNaO}_3\text{S}$  376.0983; Found 376.0986.

[D]-**3a** (27% D)



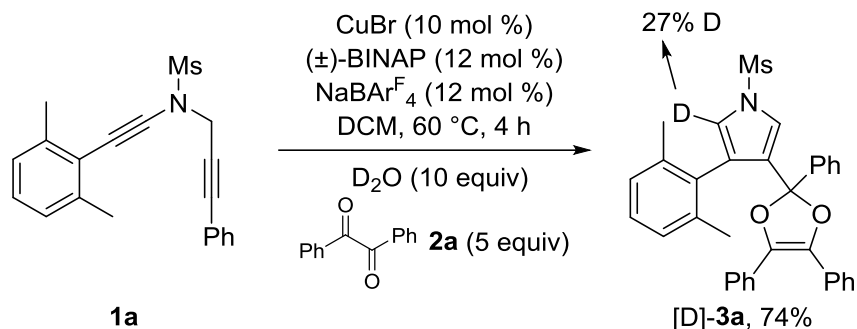

Compound **[D]-3a** was prepared in 74% yield (40.6 mg) according to the above general procedure (0.1 mmol scale).  $^1\text{H NMR}$  (400 MHz,  $\text{CDCl}_3$ )  $\delta$  7.51 – 7.46 (m, 2H), 7.31 – 7.19 (m, 13H), 7.07 (d,  $J = 2.8$  Hz, 1H), 7.02 – 6.97 (m, 1H), 6.90 (d,  $J = 2.8$  Hz, 0.73H), 6.86 (d,  $J = 7.6$  Hz, 2H), 3.17 (s, 3H), 1.95 (s, 6H).

**[D<sub>2</sub>]-3a** (52% D)

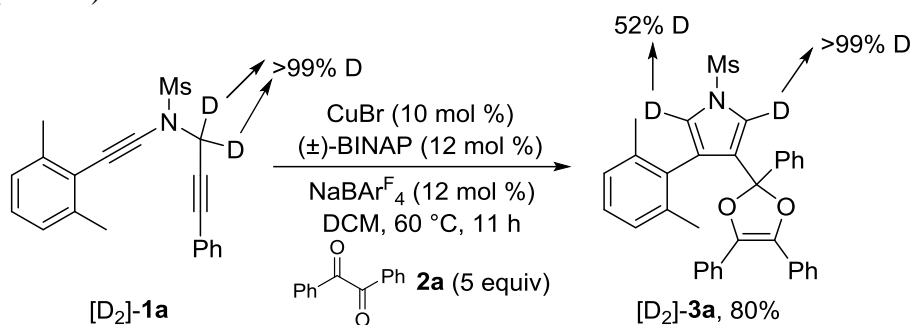

Compound **[D<sub>2</sub>]-3a** was prepared in 80% yield (43.9 mg) according to the above general procedure (0.1 mmol scale).  $^1\text{H NMR}$  (400 MHz,  $\text{CDCl}_3$ )  $\delta$  7.52 – 7.46 (m, 2H), 7.32 – 7.19 (m, 13H), 7.03 – 6.97 (m, 1H), 6.90 (s, 0.48H), 6.86 (d,  $J = 7.6$  Hz, 2H), 3.17 (s, 3H), 1.95 (s, 6H).

**[D<sub>2</sub>]-3a** (39% D)

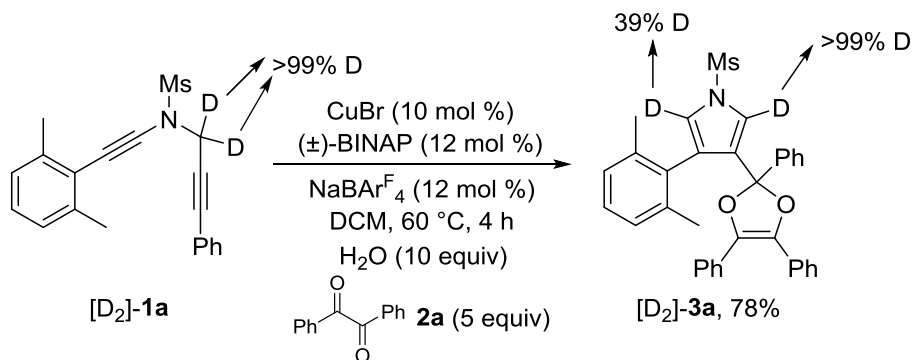

Compound [D<sub>2</sub>]-**3a** was prepared in 78% yield (42.7 mg) according to the general procedure (0.1 mmol scale). <sup>1</sup>H NMR (400 MHz, CDCl<sub>3</sub>) δ 7.51 – 7.45 (m, 2H), 7.32 – 7.19 (m, 13H), 7.02 – 6.97 (m, 1H), 6.90 (s, 0.61H), 6.86 (d, *J* = 7.6 Hz, 2H), 3.17 (s, 3H), 1.95 (s, 6H).

### 3. Reference

- 1) L.-J. Qi, C.-T. Li, Z.-Q. Huang, J.-T. Jiang, X.-Q. Zhu, X. Lu and L.-W. Ye, Enantioselective Copper-Catalyzed Formal [2 + 1] and [4 + 1] Annulations of Diynes with Ketones via Carbonyl Ylides, *Angew. Chem., Int. Ed.*, 2022, **61**, e202210637.
- 2) X.-Q. Zhu, P. Hong, Y.-X. Zheng, Y.-Y. Zhen, F.-L. Hong, X. Lu and L.-W. Ye, Copper-Catalyzed Asymmetric Cyclization of Alkenyl Diynes: Method Development and New Mechanistic Insights, *Chem. Sci.*, 2021, **11**, 9466.
- 3) D. J. Cassar, E. Nagaradja, D. C. D. Butler, D. Villemin and C. J. Richards, Regioselective, Stereoselective, and Conformationally Controlled Synthesis of (η<sup>4</sup>-Tetraarylcyclobutadiene)-(η<sup>5</sup>-Carbomethoxycyclopentadienyl)-Cobalt Metallocenes, *Org. Lett.*, 2012, **14**, 894.
- 4) P. Daw, R. Petakamsetty, A. Sarbajna, S. Laha, R. Ramapanicker and J. K. A. Bera, Highly Efficient Catalyst for Selective Oxidative Scission of Olefins to Aldehydes: Abnormal-NHC-Ru(II) Complex in Oxidation Chemistry, *J. Am. Chem. Soc.*, 2014, **136**, 13987.
- 5) F.-L. Hong, Y.-B. Chen, S.-H. Ye, G.-Y. Zhu, X.-Q. Zhu, X. Lu, R.-S. Liu and L.-W. Ye, Copper-Catalyzed Asymmetric Reaction of Alkenyl Diynes with Styrenes by Formal [3 + 2] Cycloaddition via Cu-Containing All-Carbon 1,3-Dipoles: Access to Chiral Pyrrole-Fused Bridged [2.2.1] Skeletons, *J. Am. Chem. Soc.*, 2020, **142**, 7618.
- 6) H.-J. Luo, K. Chen, H.-F. Jiang and S.-F. Zhu, A Route to Polysubstituted Aziridines from Carbenes and Imines through a Nondiazo Approach, *Org. Lett.*, 2016, **18**, 5208.

## Crystal data and structure refinement for **3ab**. CCDC Number = 2203937

ORTEP drawing of **3ab** (thermal ellipsoids set at 50% probability). Recrystallization from *n*-hexane/DCM afforded single crystals suitable for X-ray diffraction analysis.

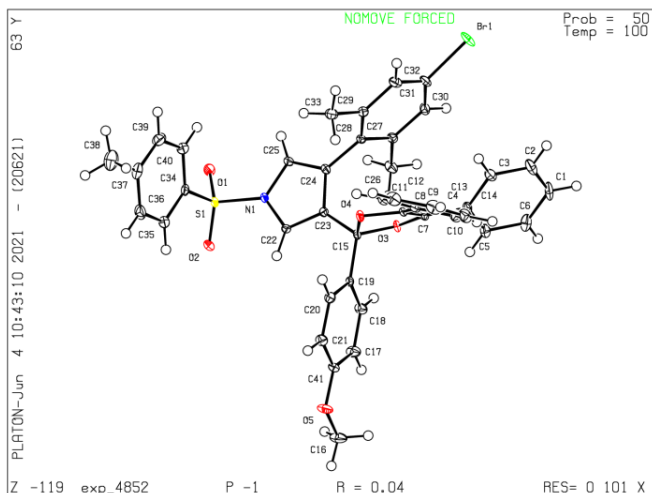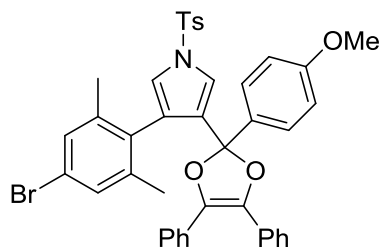

Bond precision: C-C = 0.0030 Å

Wavelength=1.54184

Cell: a=9.7649(1) b=12.8932(2) c=14.5411(1)  
alpha=73.868(1) beta=88.437(1) gamma=78.631(1)  
Temperature: 100 K

|                        | Calculated        | Reported          |
|------------------------|-------------------|-------------------|
| Volume                 | 1723.41(4)        | 1723.41(4)        |
| Space group            | P -1              | P -1              |
| Hall group             | -P 1              | -P 1              |
| Moiety formula         | C41 H34 Br N O5 S | C41 H34 Br N O5 S |
| Sum formula            | C41 H34 Br N O5 S | C41 H34 Br N O5 S |
| Mr                     | 732.65            | 732.66            |
| Dx, g cm <sup>-3</sup> | 1.412             | 1.412             |
| Z                      | 2                 | 2                 |
| Mu (mm <sup>-1</sup> ) | 2.573             | 2.573             |
| F000                   | 756.0             | 756.0             |
| F000'                  | 757.27            |                   |
| h,k,lmax               | 12,16,18          | 12,16,18          |
| Nref                   | 7105              | 6843              |
| Tmin,Tmax              | 0.975,0.975       | 0.609,1.000       |
| Tmin'                  | 0.975             |                   |

Correction method= # Reported T Limits: Tmin=0.609 Tmax=1.000  
AbsCorr = MULTI-SCAN

Data completeness= 0.963

Theta (max)= 74.943

R(reflections)= 0.0409( 6634)

wR2(reflections)= 0.1083( 6843)

S = 1.133

Npar= 446

(+)-3z/L\*: HPLC (IE, *n*-hexane/2-propanol = 95/5, flow rate = 1.0 mL/min, I = 254 nm)

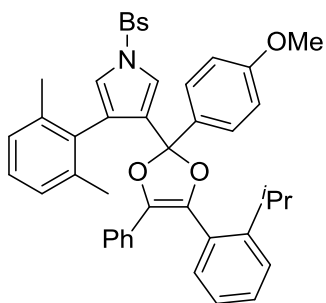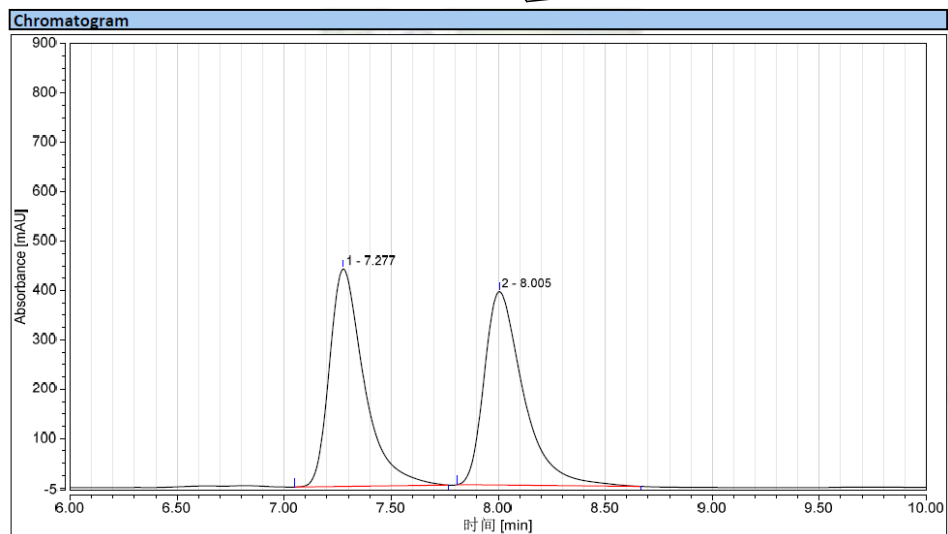

**Integration Results**

| No.           | Peak Name | Retention Time min | Area mAU*min   | Height mAU     | Relative Area % | Relative Height % | Amount n.a. |
|---------------|-----------|--------------------|----------------|----------------|-----------------|-------------------|-------------|
| 1             |           | 7.277              | 82.877         | 440.572        | 49.99           | 52.92             | n.a.        |
| 2             |           | 8.005              | 82.908         | 391.907        | 50.01           | 47.08             | n.a.        |
| <b>Total:</b> |           |                    | <b>165.786</b> | <b>832.479</b> | <b>100.00</b>   | <b>100.00</b>     |             |

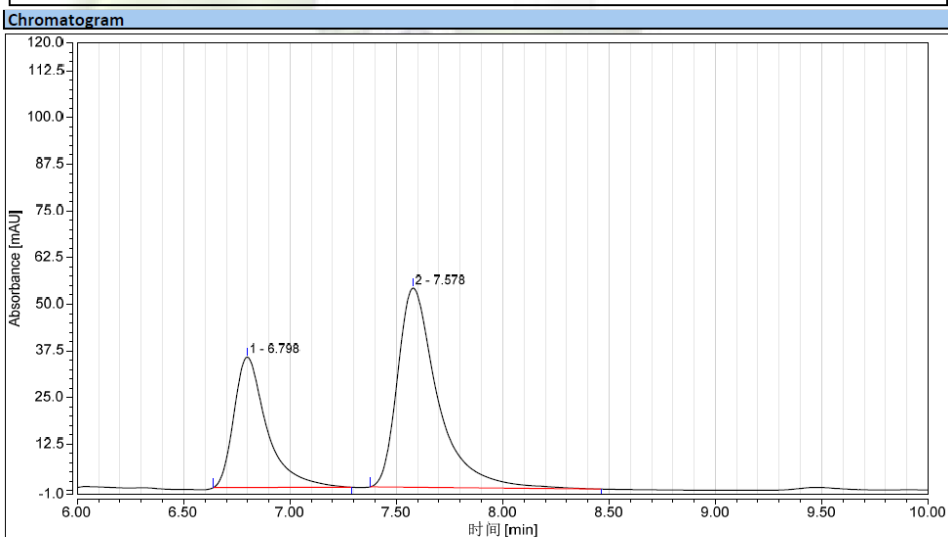

**Integration Results**

| No.           | Peak Name | Retention Time min | Area mAU*min  | Height mAU    | Relative Area % | Relative Height % | Amount n.a. |
|---------------|-----------|--------------------|---------------|---------------|-----------------|-------------------|-------------|
| 1             |           | 6.798              | 6.297         | 34.991        | 35.00           | 39.58             | n.a.        |
| 2             |           | 7.578              | 11.694        | 53.424        | 65.00           | 60.42             | n.a.        |
| <b>Total:</b> |           |                    | <b>17.991</b> | <b>88.415</b> | <b>100.00</b>   | <b>100.00</b>     |             |

(+)-**3aa/L\***: HPLC (IE, *n*-hexane/2-propanol = 98/2, flow rate = 1.0 mL/min, I = 254 nm)

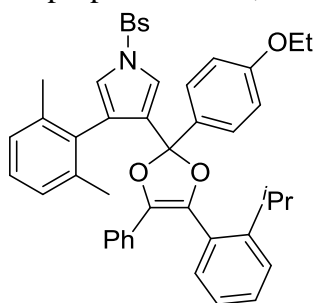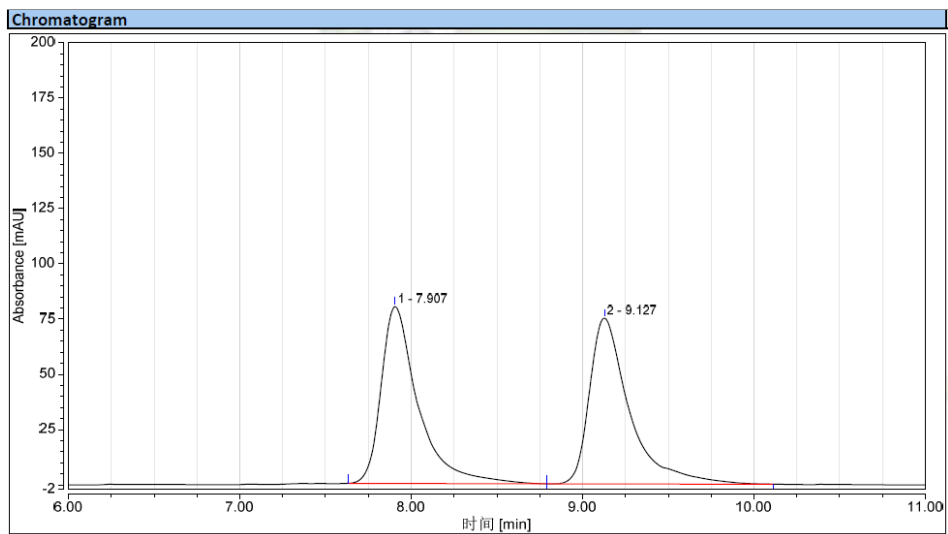

**Integration Results**

| No.           | Peak Name | Retention Time min | Area mAU*min  | Height mAU     | Relative Area % | Relative Height % | Amount |
|---------------|-----------|--------------------|---------------|----------------|-----------------|-------------------|--------|
| 1             |           | 7.907              | 20.089        | 80.036         | 49.73           | 51.64             | n.a.   |
| 2             |           | 9.127              | 20.309        | 74.938         | 50.27           | 48.36             | n.a.   |
| <b>Total:</b> |           |                    | <b>40.398</b> | <b>154.974</b> | <b>100.00</b>   | <b>100.00</b>     |        |

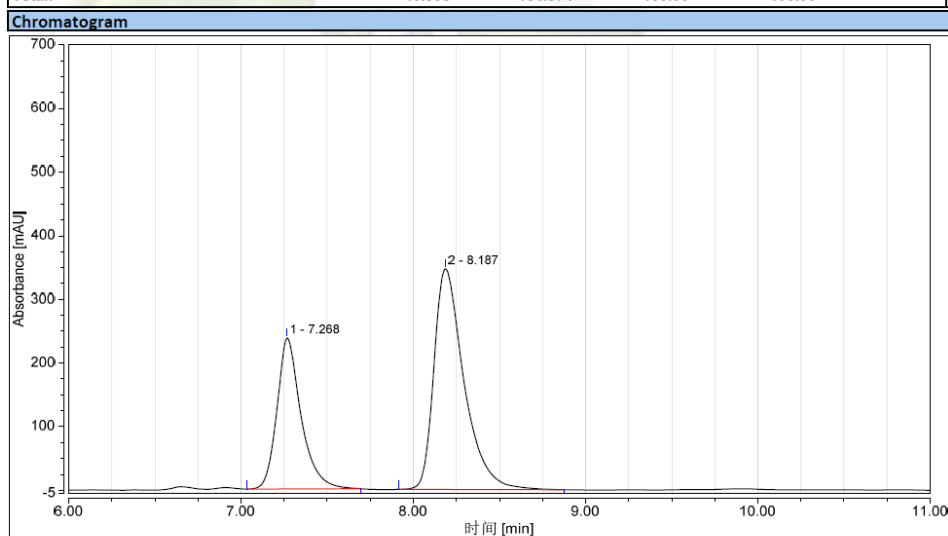

**Integration Results**

| No.           | Peak Name | Retention Time min | Area mAU*min   | Height mAU     | Relative Area % | Relative Height % | Amount |
|---------------|-----------|--------------------|----------------|----------------|-----------------|-------------------|--------|
| 1             |           | 7.268              | 38.427         | 237.641        | 35.46           | 40.64             | n.a.   |
| 2             |           | 8.187              | 69.930         | 347.048        | 64.54           | 59.36             | n.a.   |
| <b>Total:</b> |           |                    | <b>108.357</b> | <b>584.689</b> | <b>100.00</b>   | <b>100.00</b>     |        |

7.442  
7.426  
7.422  
7.364  
7.342  
7.323  
7.302  
7.118  
7.101  
7.096  
7.080  
7.041  
7.023

4.638

3.273

2.440

| Parameter                | Value               |
|--------------------------|---------------------|
| 1 Title                  | XHJ-1-148-Ms-H      |
| 2 Origin                 |                     |
| 3 Solvent                | CDC13               |
| 4 Temperature            | 297.1               |
| 5 Number of Scans        | 16                  |
| 6 Acquisition Time       | 4.0002              |
| 7 Acquisition Date       | 2022-01-14T15:45:52 |
| 8 Spectrometer Frequency | 399.93              |
| 9 Spectral Width         | 8012.0              |

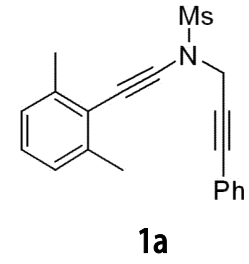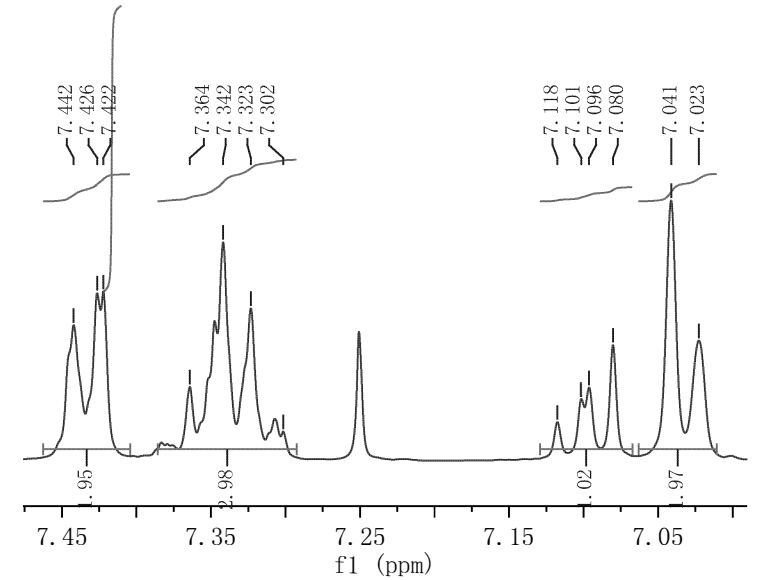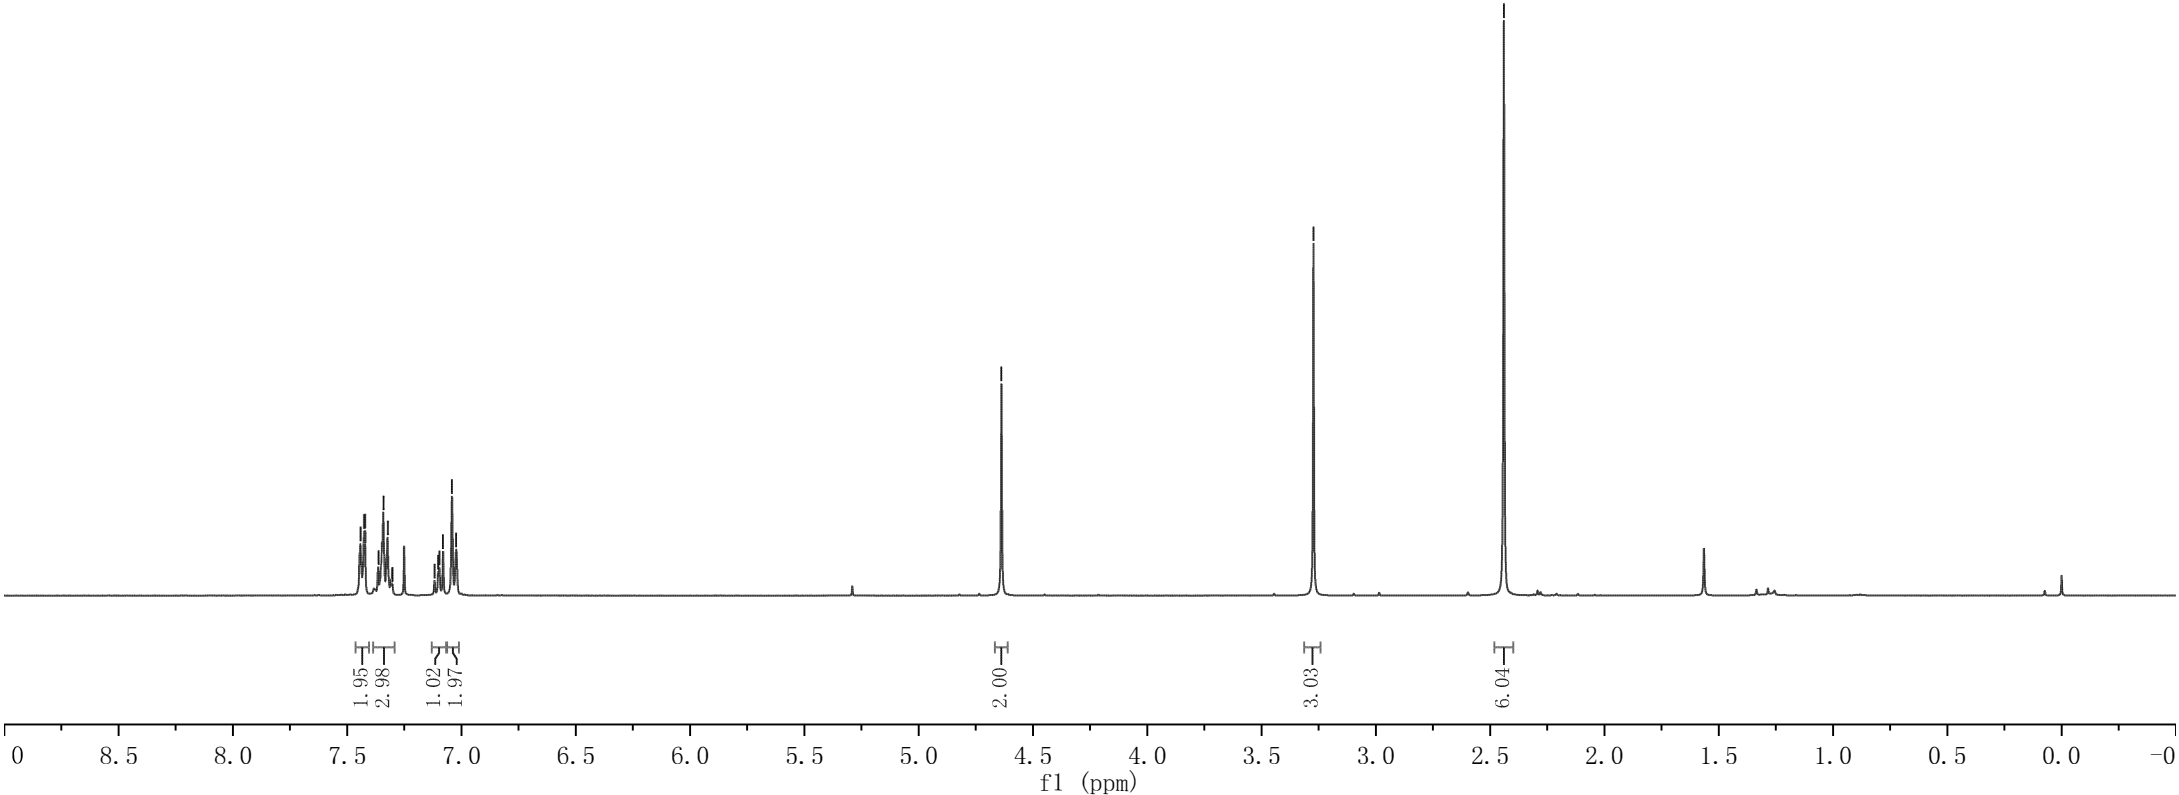

| Parameter                | Value               |
|--------------------------|---------------------|
| 1 Title                  | XHJ-1-148-Ms-C      |
| 2 Origin                 |                     |
| 3 Solvent                | CDC13               |
| 4 Temperature            | 297.2               |
| 5 Number of Scans        | 200                 |
| 6 Acquisition Time       | 1.0000              |
| 7 Acquisition Date       | 2022-01-14T15:55:03 |
| 8 Spectrometer Frequency | 100.56              |
| 9 Spectral Width         | 26041.0             |

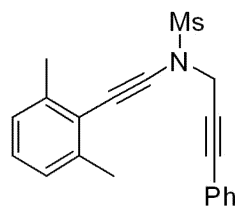

**1a**

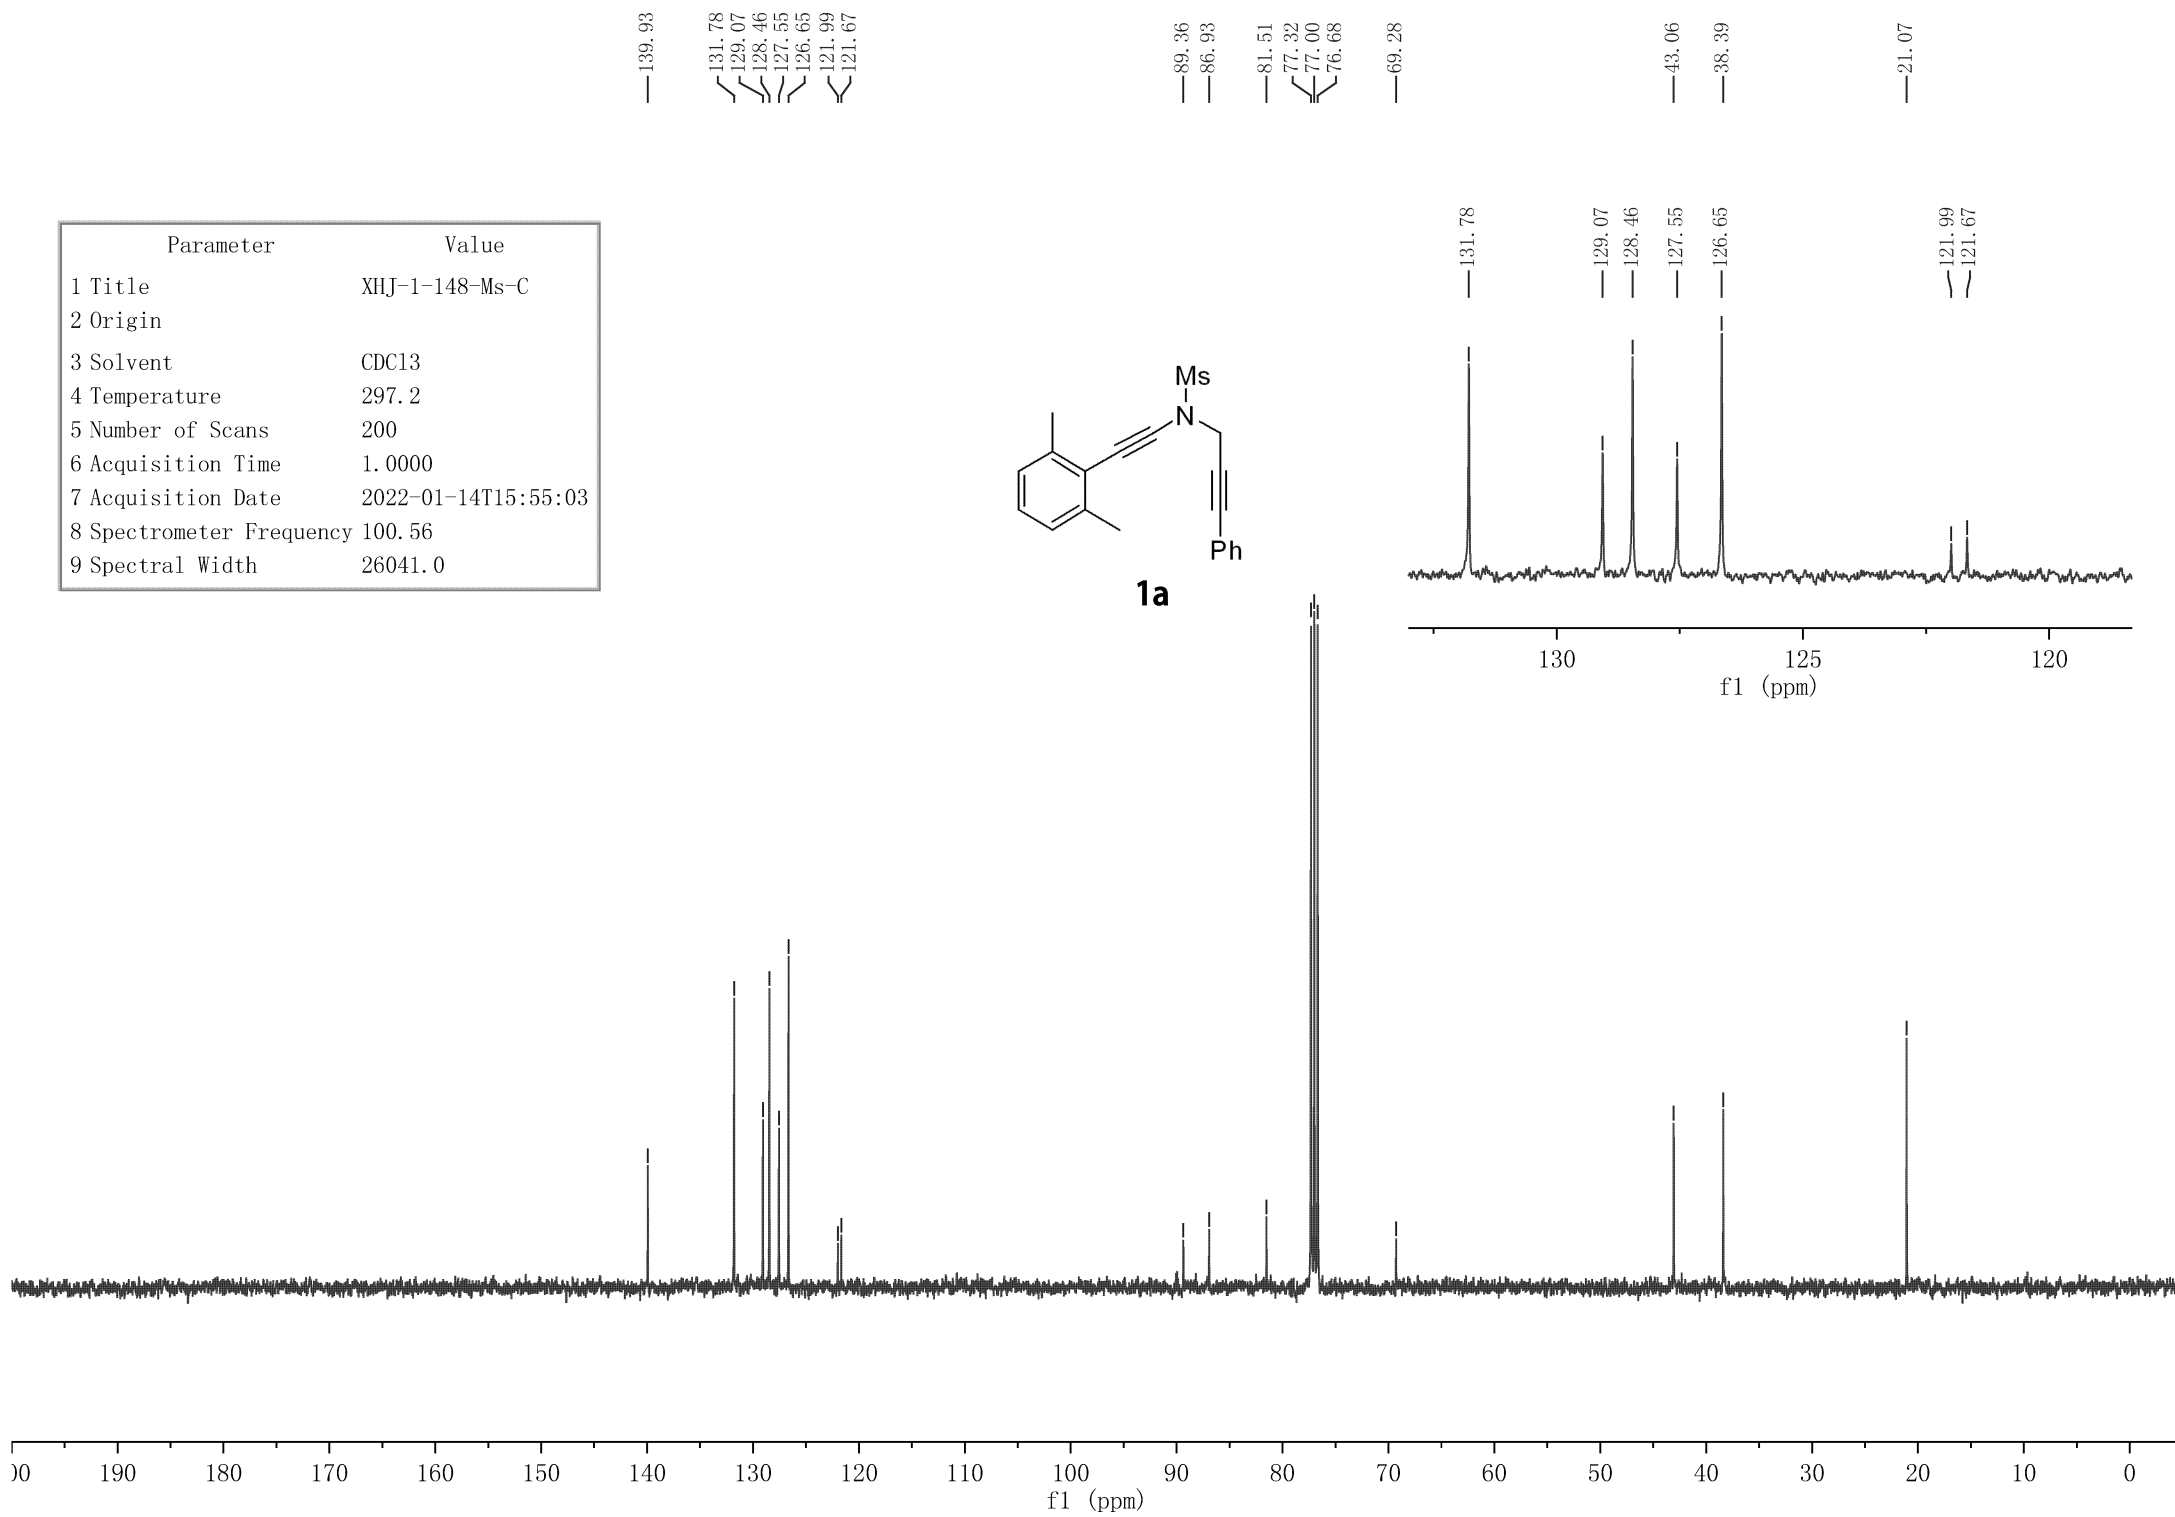

7.925  
7.904  
7.282  
7.269  
7.249  
7.231  
7.213  
7.135  
7.117  
7.082  
7.066  
7.061  
7.045  
7.006  
6.987

| Parameter                | Value               |
|--------------------------|---------------------|
| 1 Title                  | XHJ-1-95-H-2        |
| 2 Origin                 |                     |
| 3 Solvent                | CDCl3               |
| 4 Temperature            | 297.6               |
| 5 Number of Scans        | 40                  |
| 6 Acquisition Time       | 4.0002              |
| 7 Acquisition Date       | 2022-01-20T12:12:39 |
| 8 Spectrometer Frequency | 399.93              |
| 9 Spectral Width         | 8012.0              |

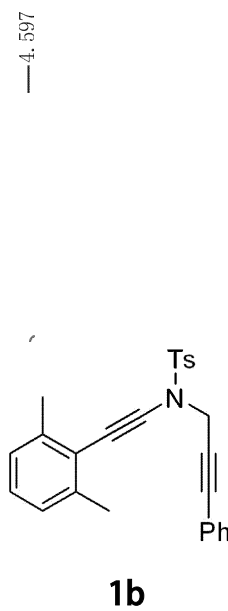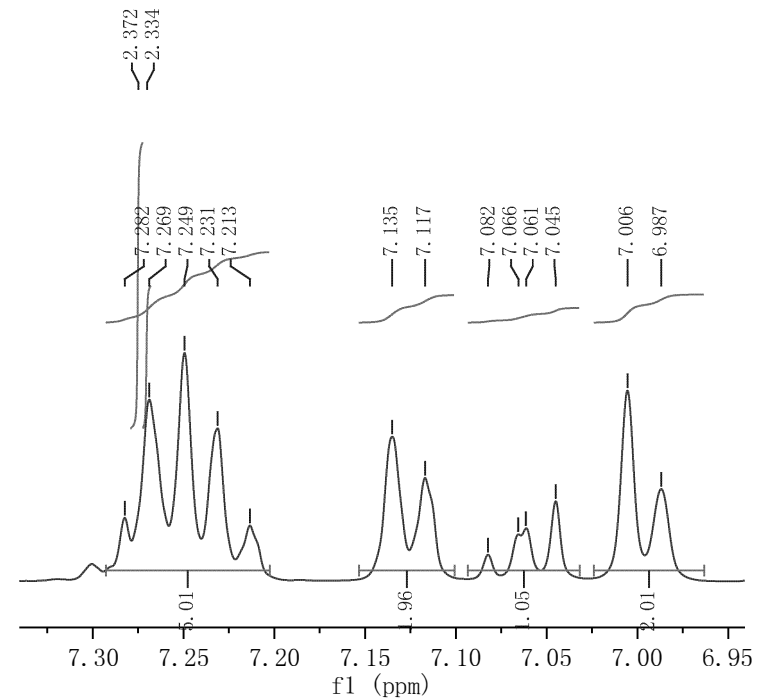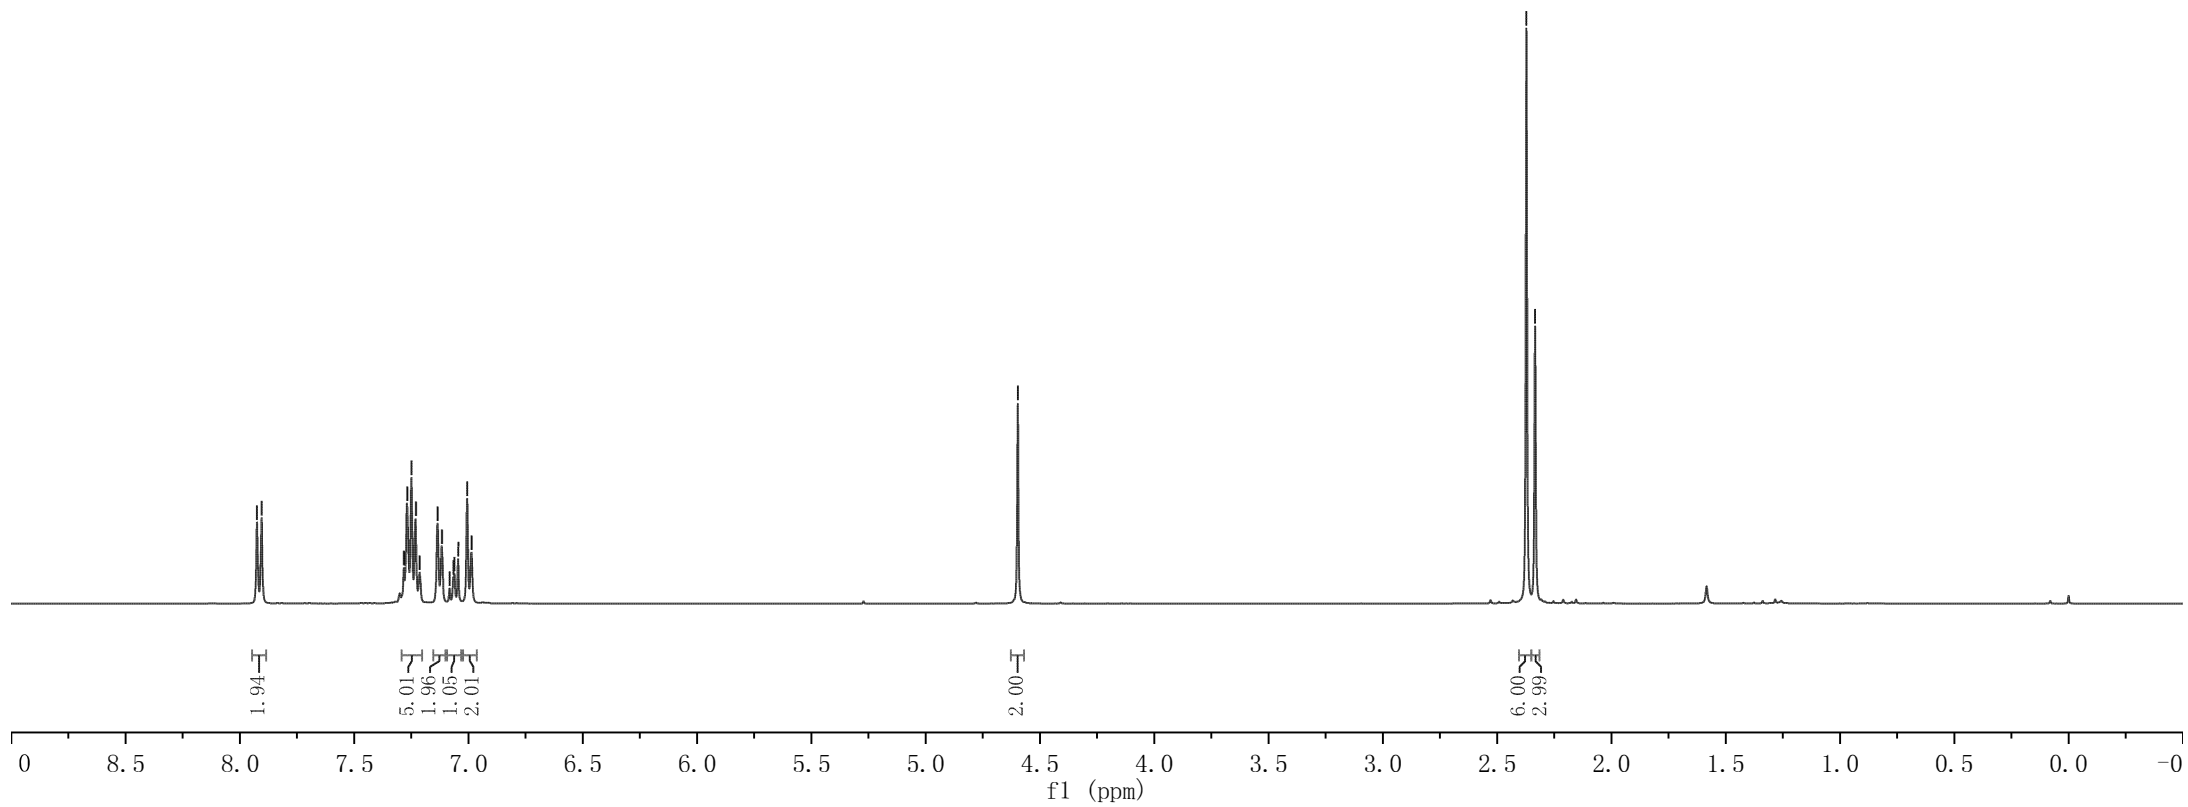



| Parameter                | Value               |
|--------------------------|---------------------|
| 1 Title                  | XHJ-1-95-C-2        |
| 2 Origin                 |                     |
| 3 Solvent                | CDC13               |
| 4 Temperature            | 297.8               |
| 5 Number of Scans        | 400                 |
| 6 Acquisition Time       | 1.0000              |
| 7 Acquisition Date       | 2022-01-20T12:28:05 |
| 8 Spectrometer Frequency | 100.56              |
| 9 Spectral Width         | 26041.0             |

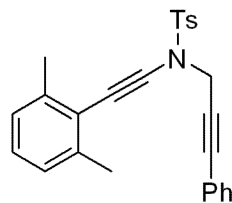

**1b**

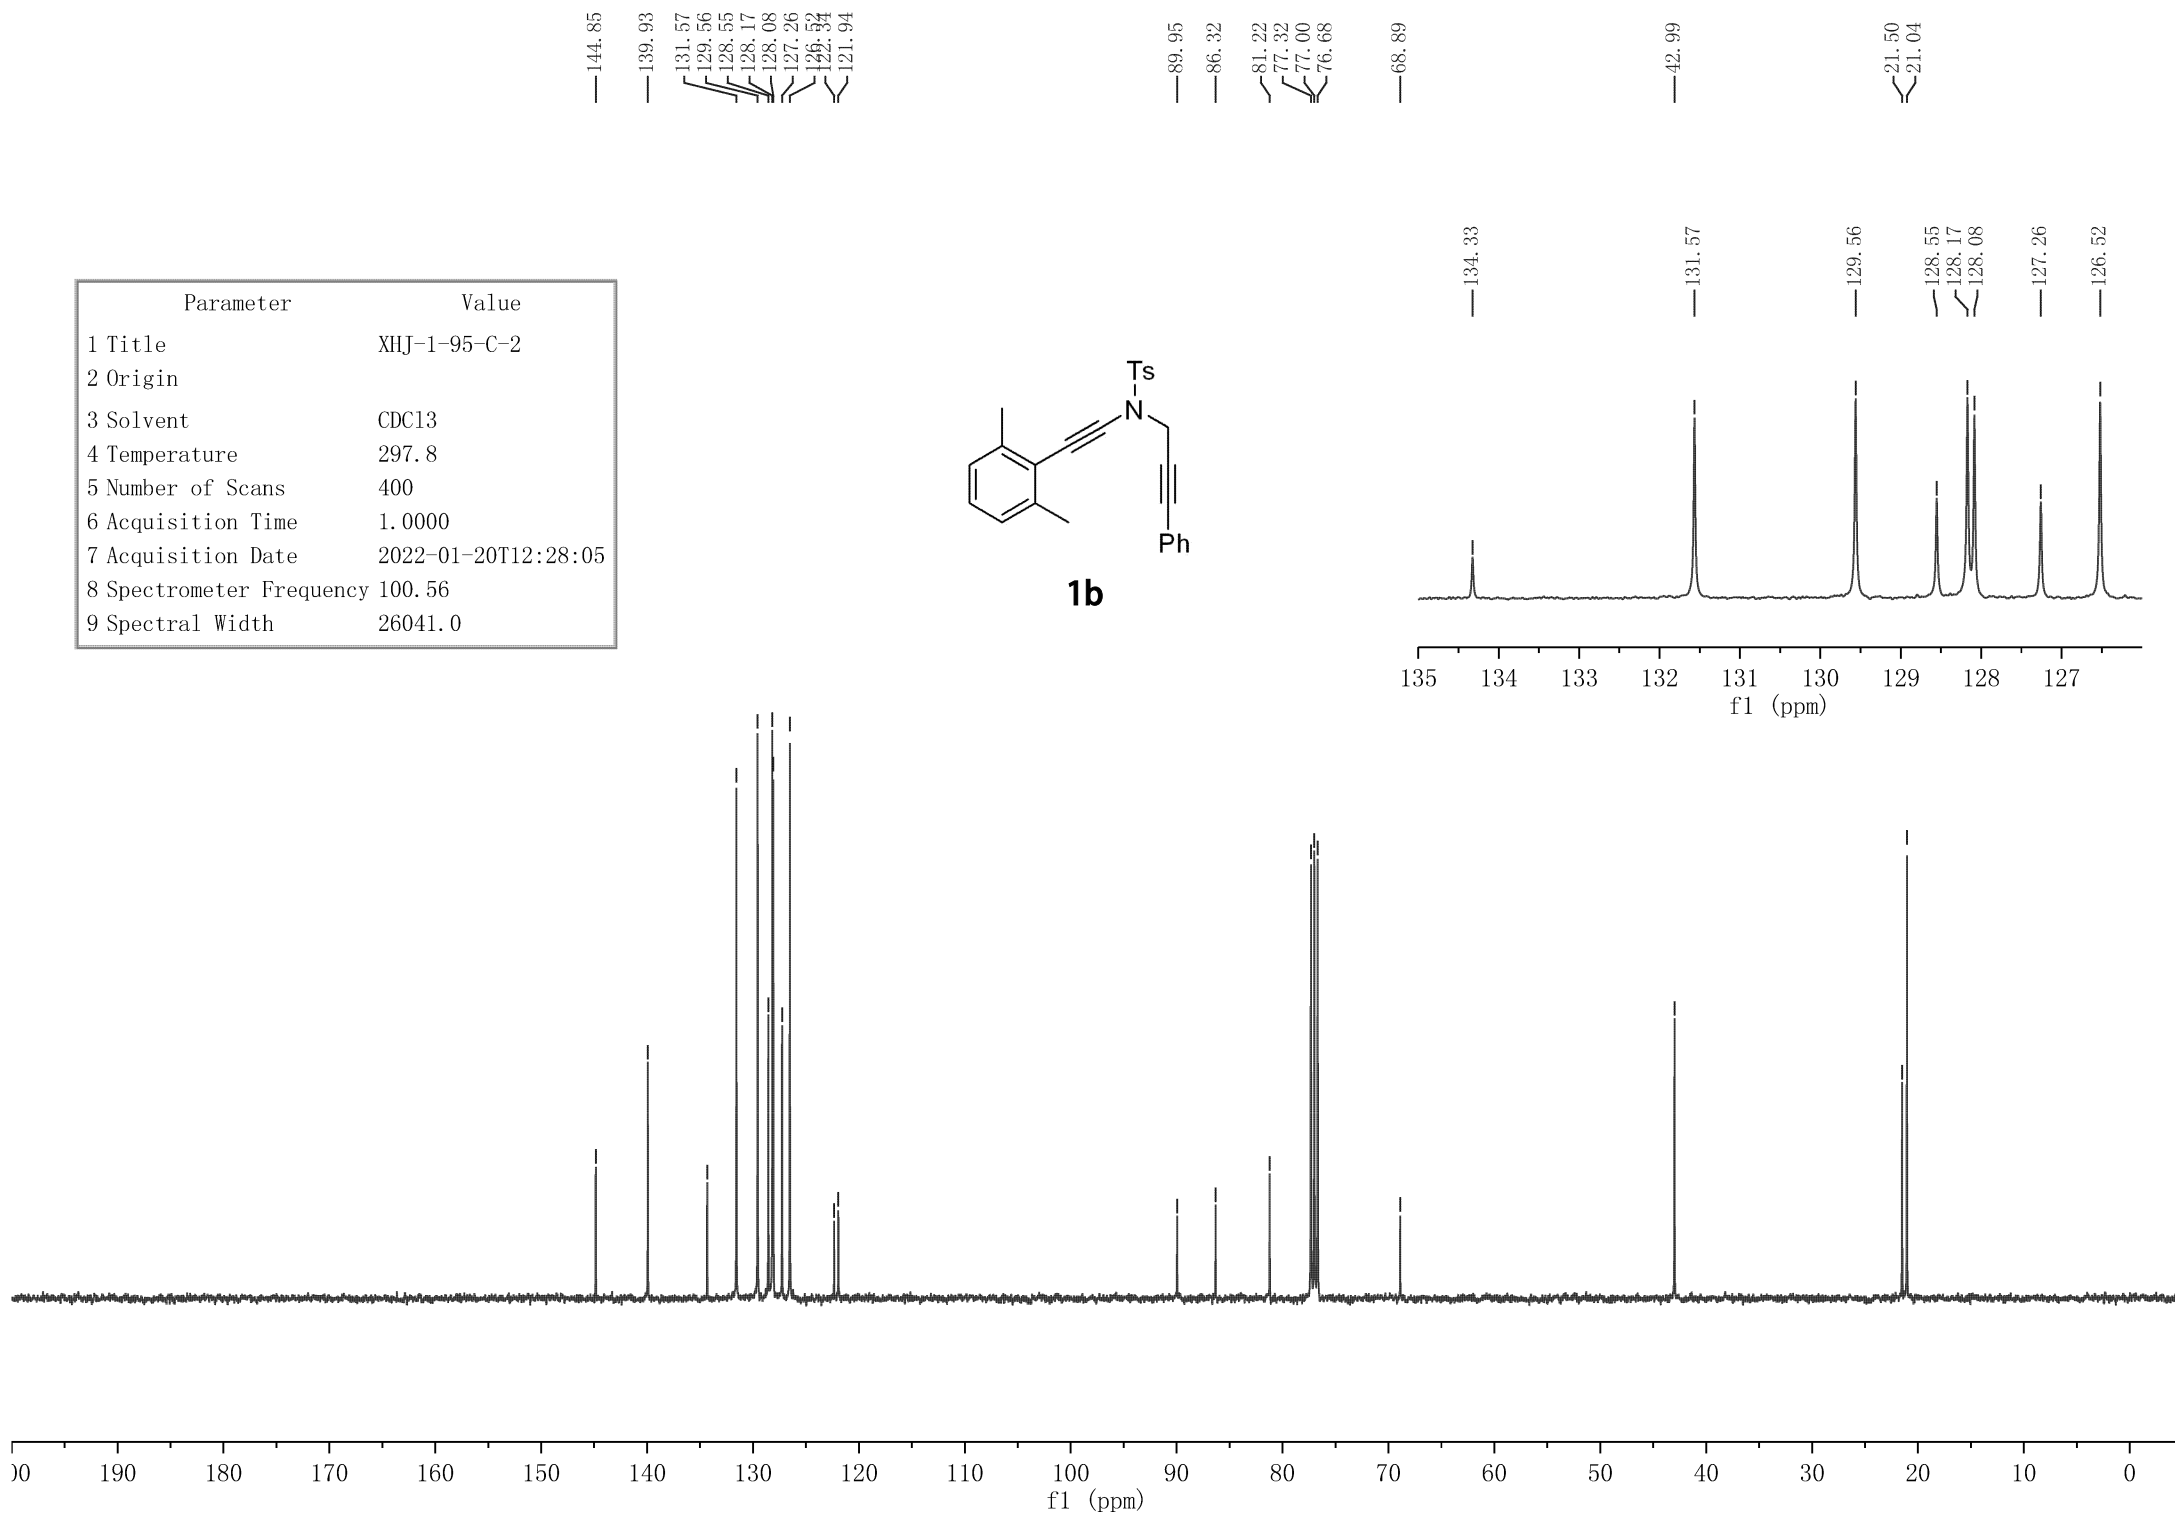

| Parameter                | Value               |
|--------------------------|---------------------|
| 1 Title                  | 1c                  |
| 2 Origin                 |                     |
| 3 Solvent                | CDC13               |
| 4 Temperature            | 297.5               |
| 5 Number of Scans        | 16                  |
| 6 Acquisition Time       | 4.0002              |
| 7 Acquisition Date       | 2022-01-15T14:36:25 |
| 8 Spectrometer Frequency | 399.93              |
| 9 Spectral Width         | 8012.0              |

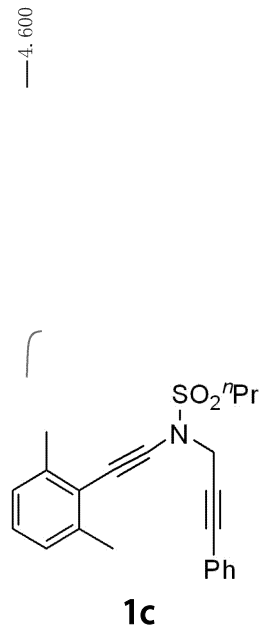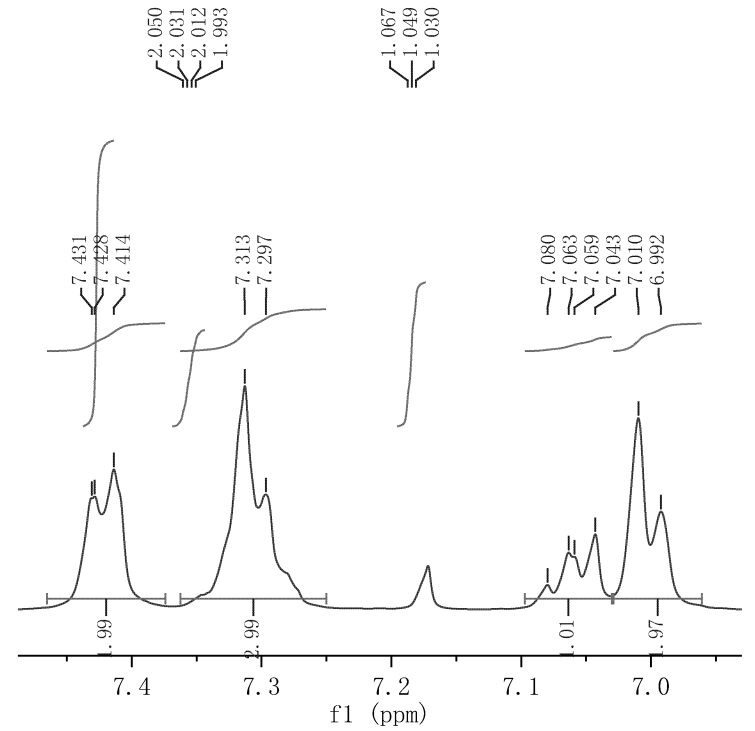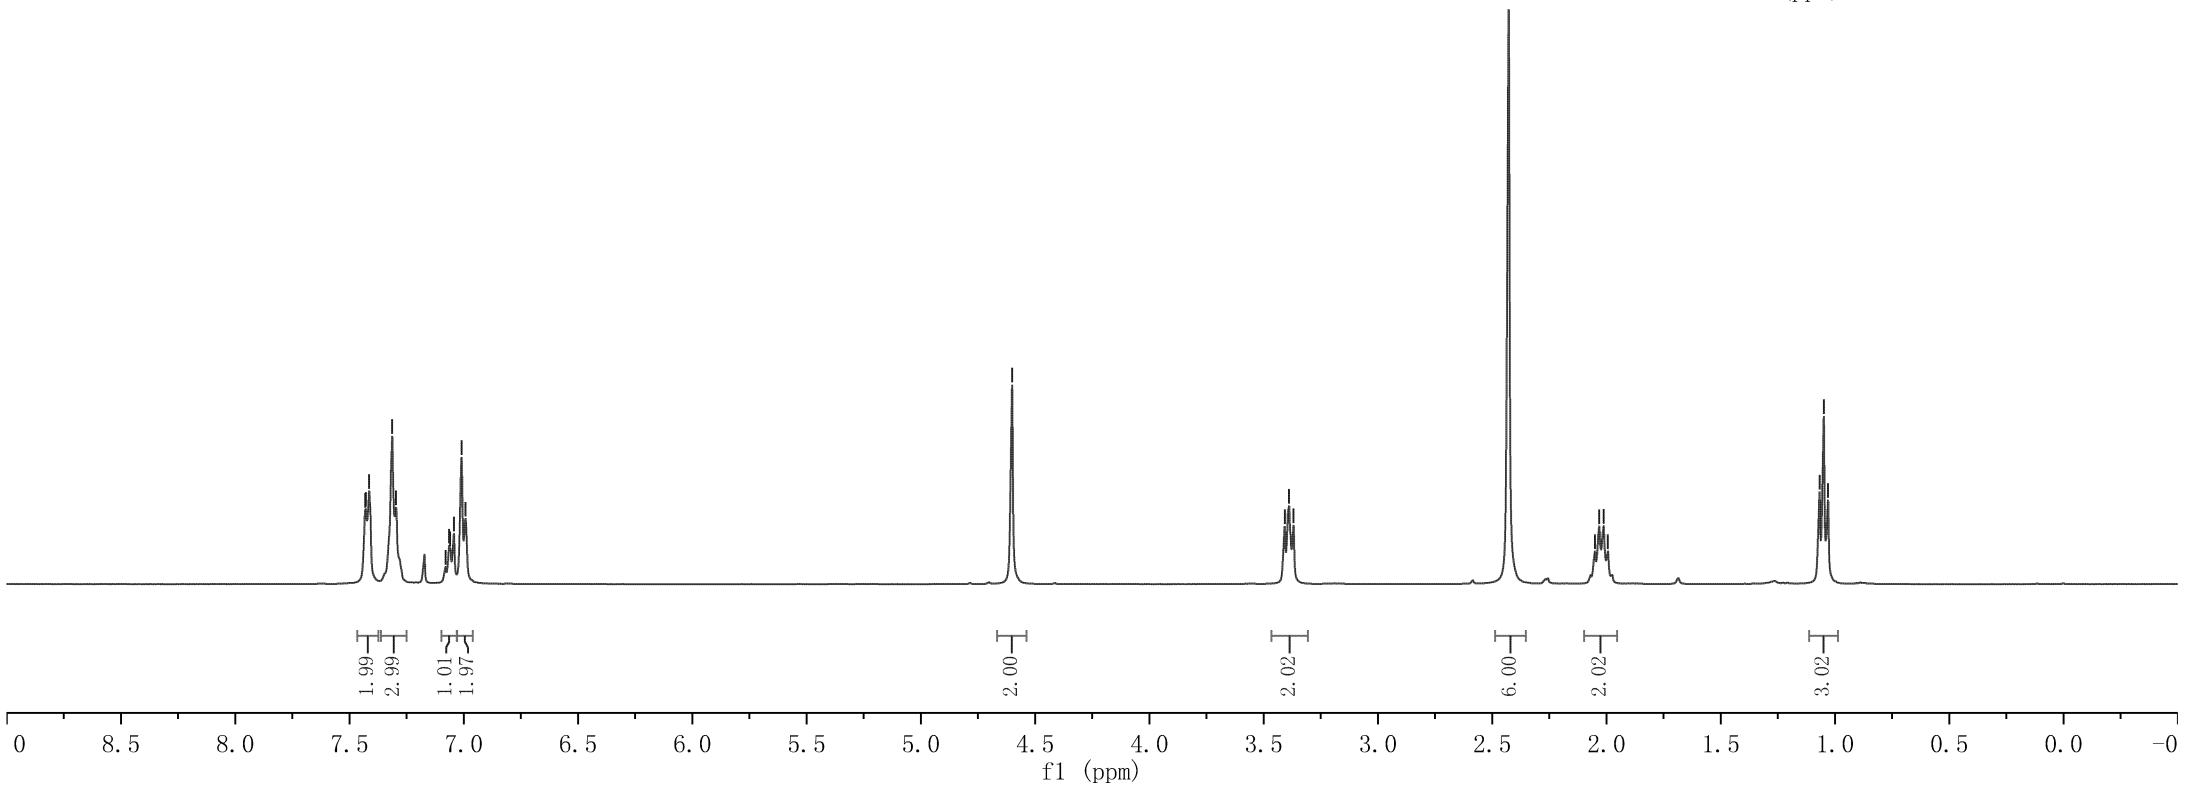

| Parameter                | Value               |
|--------------------------|---------------------|
| 1 Title                  | 1c                  |
| 2 Origin                 |                     |
| 3 Solvent                | CDC13               |
| 4 Temperature            | 297.5               |
| 5 Number of Scans        | 200                 |
| 6 Acquisition Time       | 1.0000              |
| 7 Acquisition Date       | 2022-01-15T14:45:14 |
| 8 Spectrometer Frequency | 100.56              |
| 9 Spectral Width         | 26041.0             |

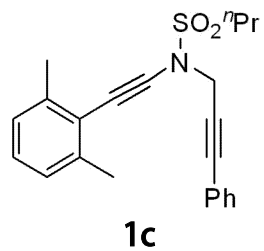

— 139.52  
 — 131.56  
 — 128.83  
 — 128.29  
 — 127.19  
 — 126.48  
 — 122.12  
 — 121.67  
 — 89.71  
 — 86.39  
 — 81.86  
 — 77.32  
 — 77.00  
 — 76.68  
 — 68.93  
 — 53.92  
 — 42.53  
 — 20.91  
 — 16.89  
 — 12.82

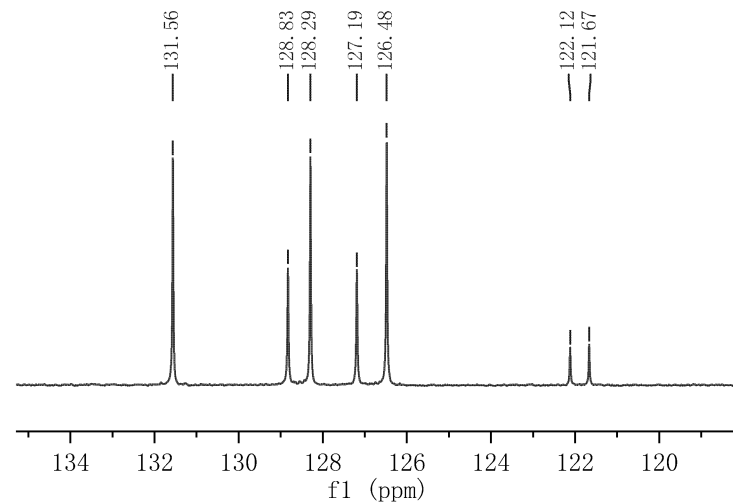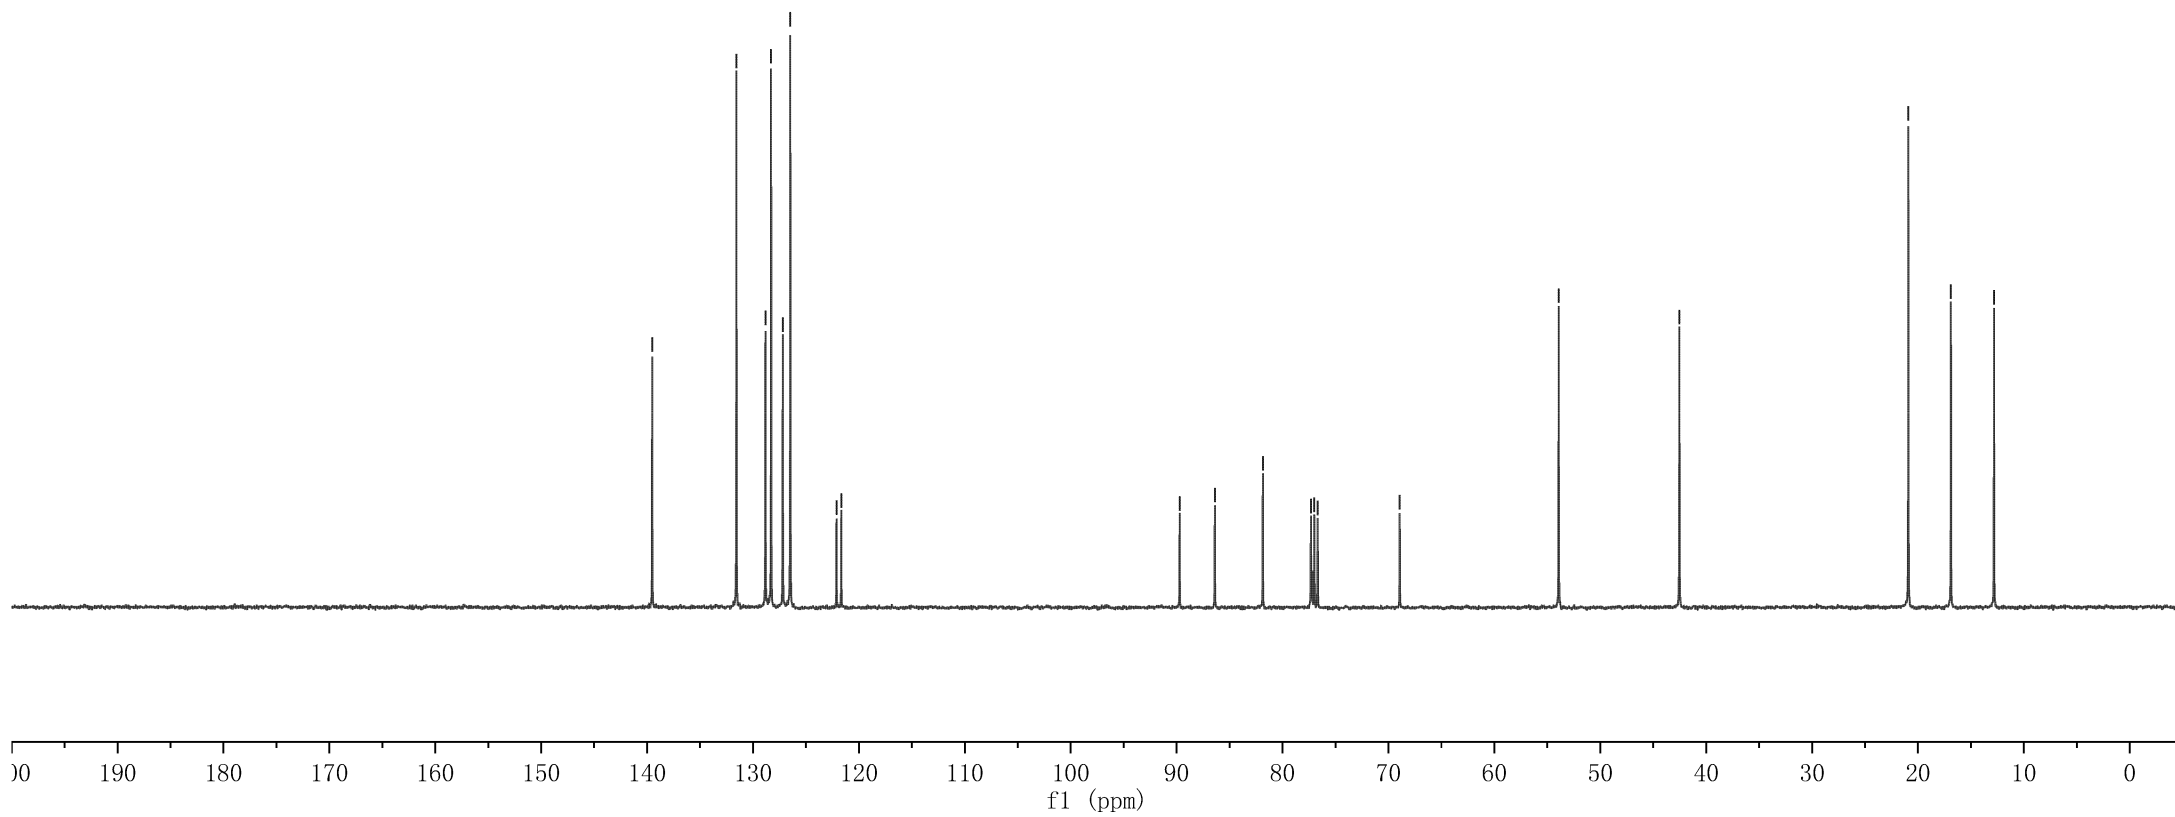

| Parameter                | Value               |
|--------------------------|---------------------|
| 1 Title                  | XHJ-1-160-H         |
| 2 Origin                 |                     |
| 3 Solvent                | CDCl3               |
| 4 Temperature            | 297.1               |
| 5 Number of Scans        | 16                  |
| 6 Acquisition Time       | 4.0002              |
| 7 Acquisition Date       | 2022-01-15T23:37:05 |
| 8 Spectrometer Frequency | 399.93              |
| 9 Spectral Width         | 8012.0              |

7.489  
7.481  
7.470  
7.466  
7.425  
7.422  
7.407  
7.402  
7.351  
7.347  
7.338  
7.334  
7.304  
7.286  
7.097  
7.081  
7.076  
7.060  
7.026  
7.007

4.615  
4.344

2.431

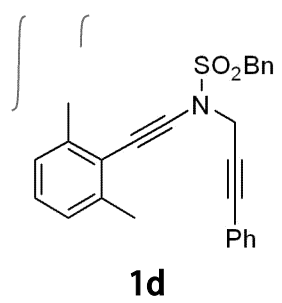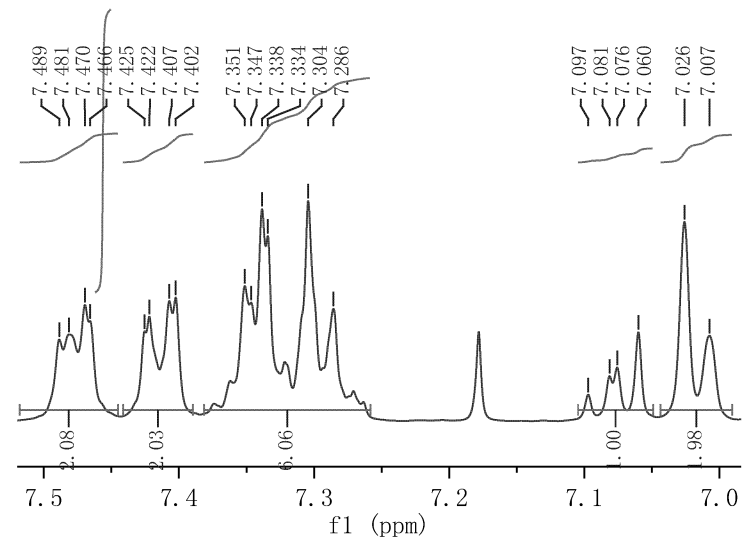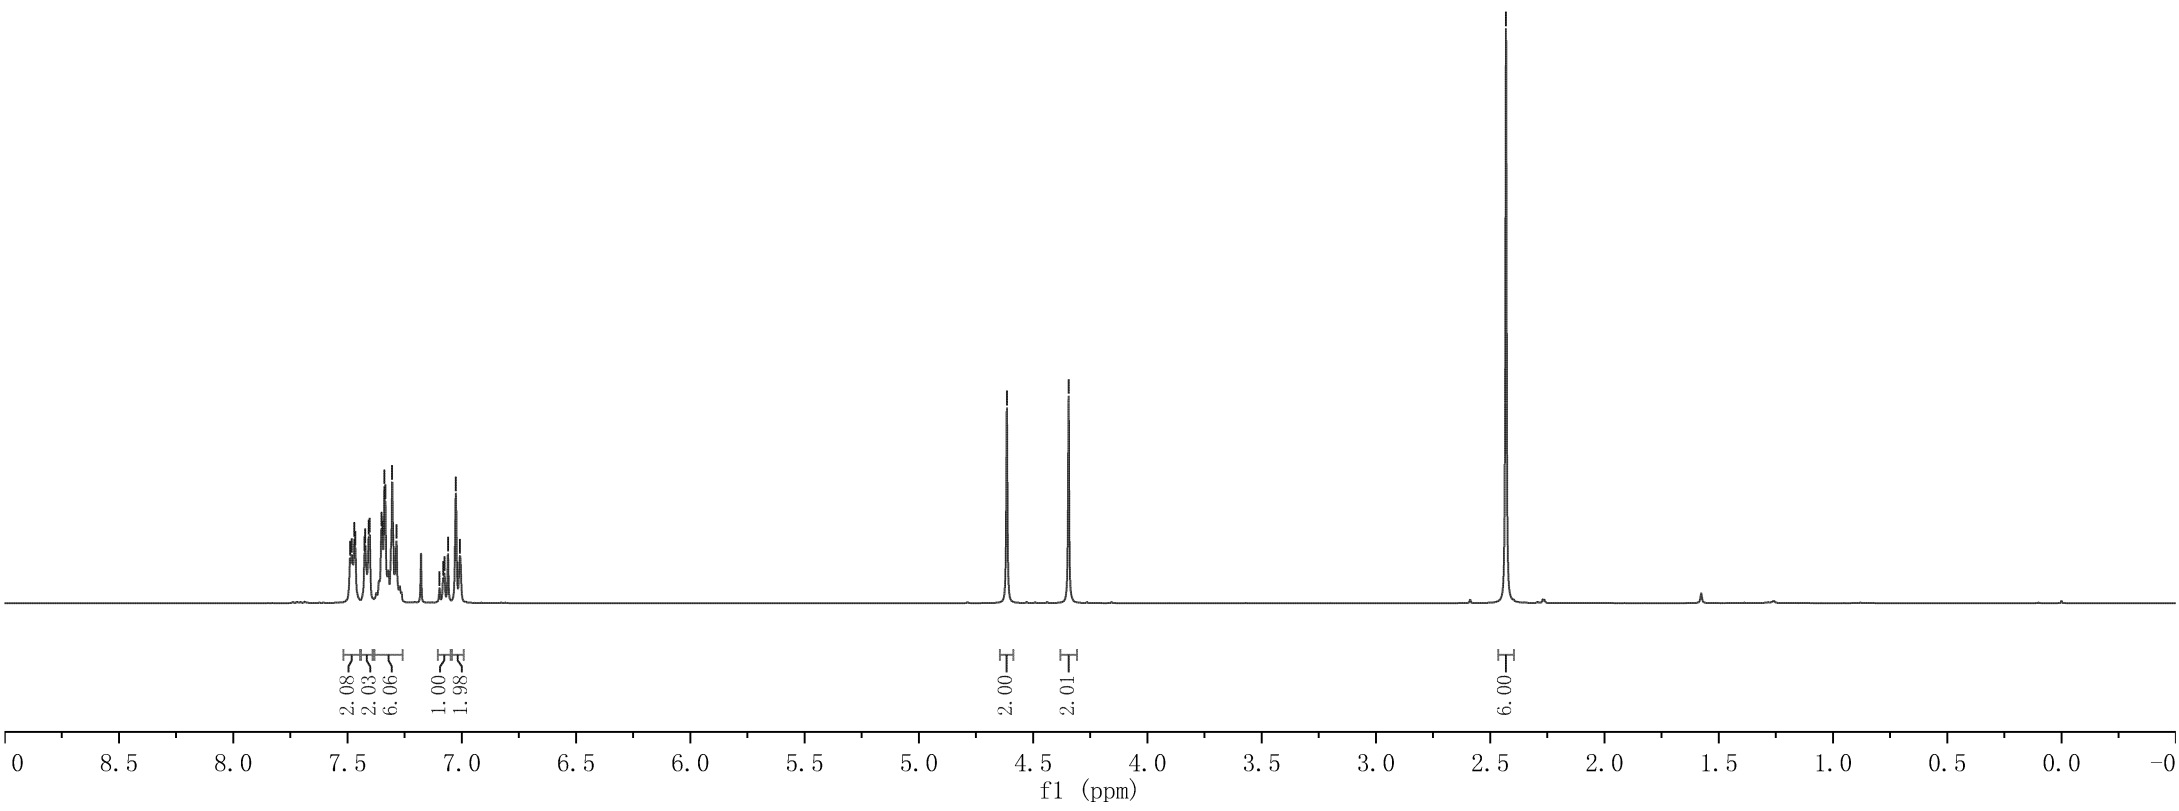

| Parameter                | Value               |
|--------------------------|---------------------|
| 1 Title                  | XHJ-1-160-C         |
| 2 Origin                 |                     |
| 3 Solvent                | CDC13               |
| 4 Temperature            | 297.1               |
| 5 Number of Scans        | 200                 |
| 6 Acquisition Time       | 1.0000              |
| 7 Acquisition Date       | 2022-01-15T23:46:00 |
| 8 Spectrometer Frequency | 100.56              |
| 9 Spectral Width         | 26041.0             |

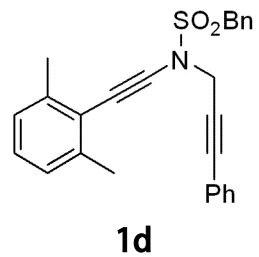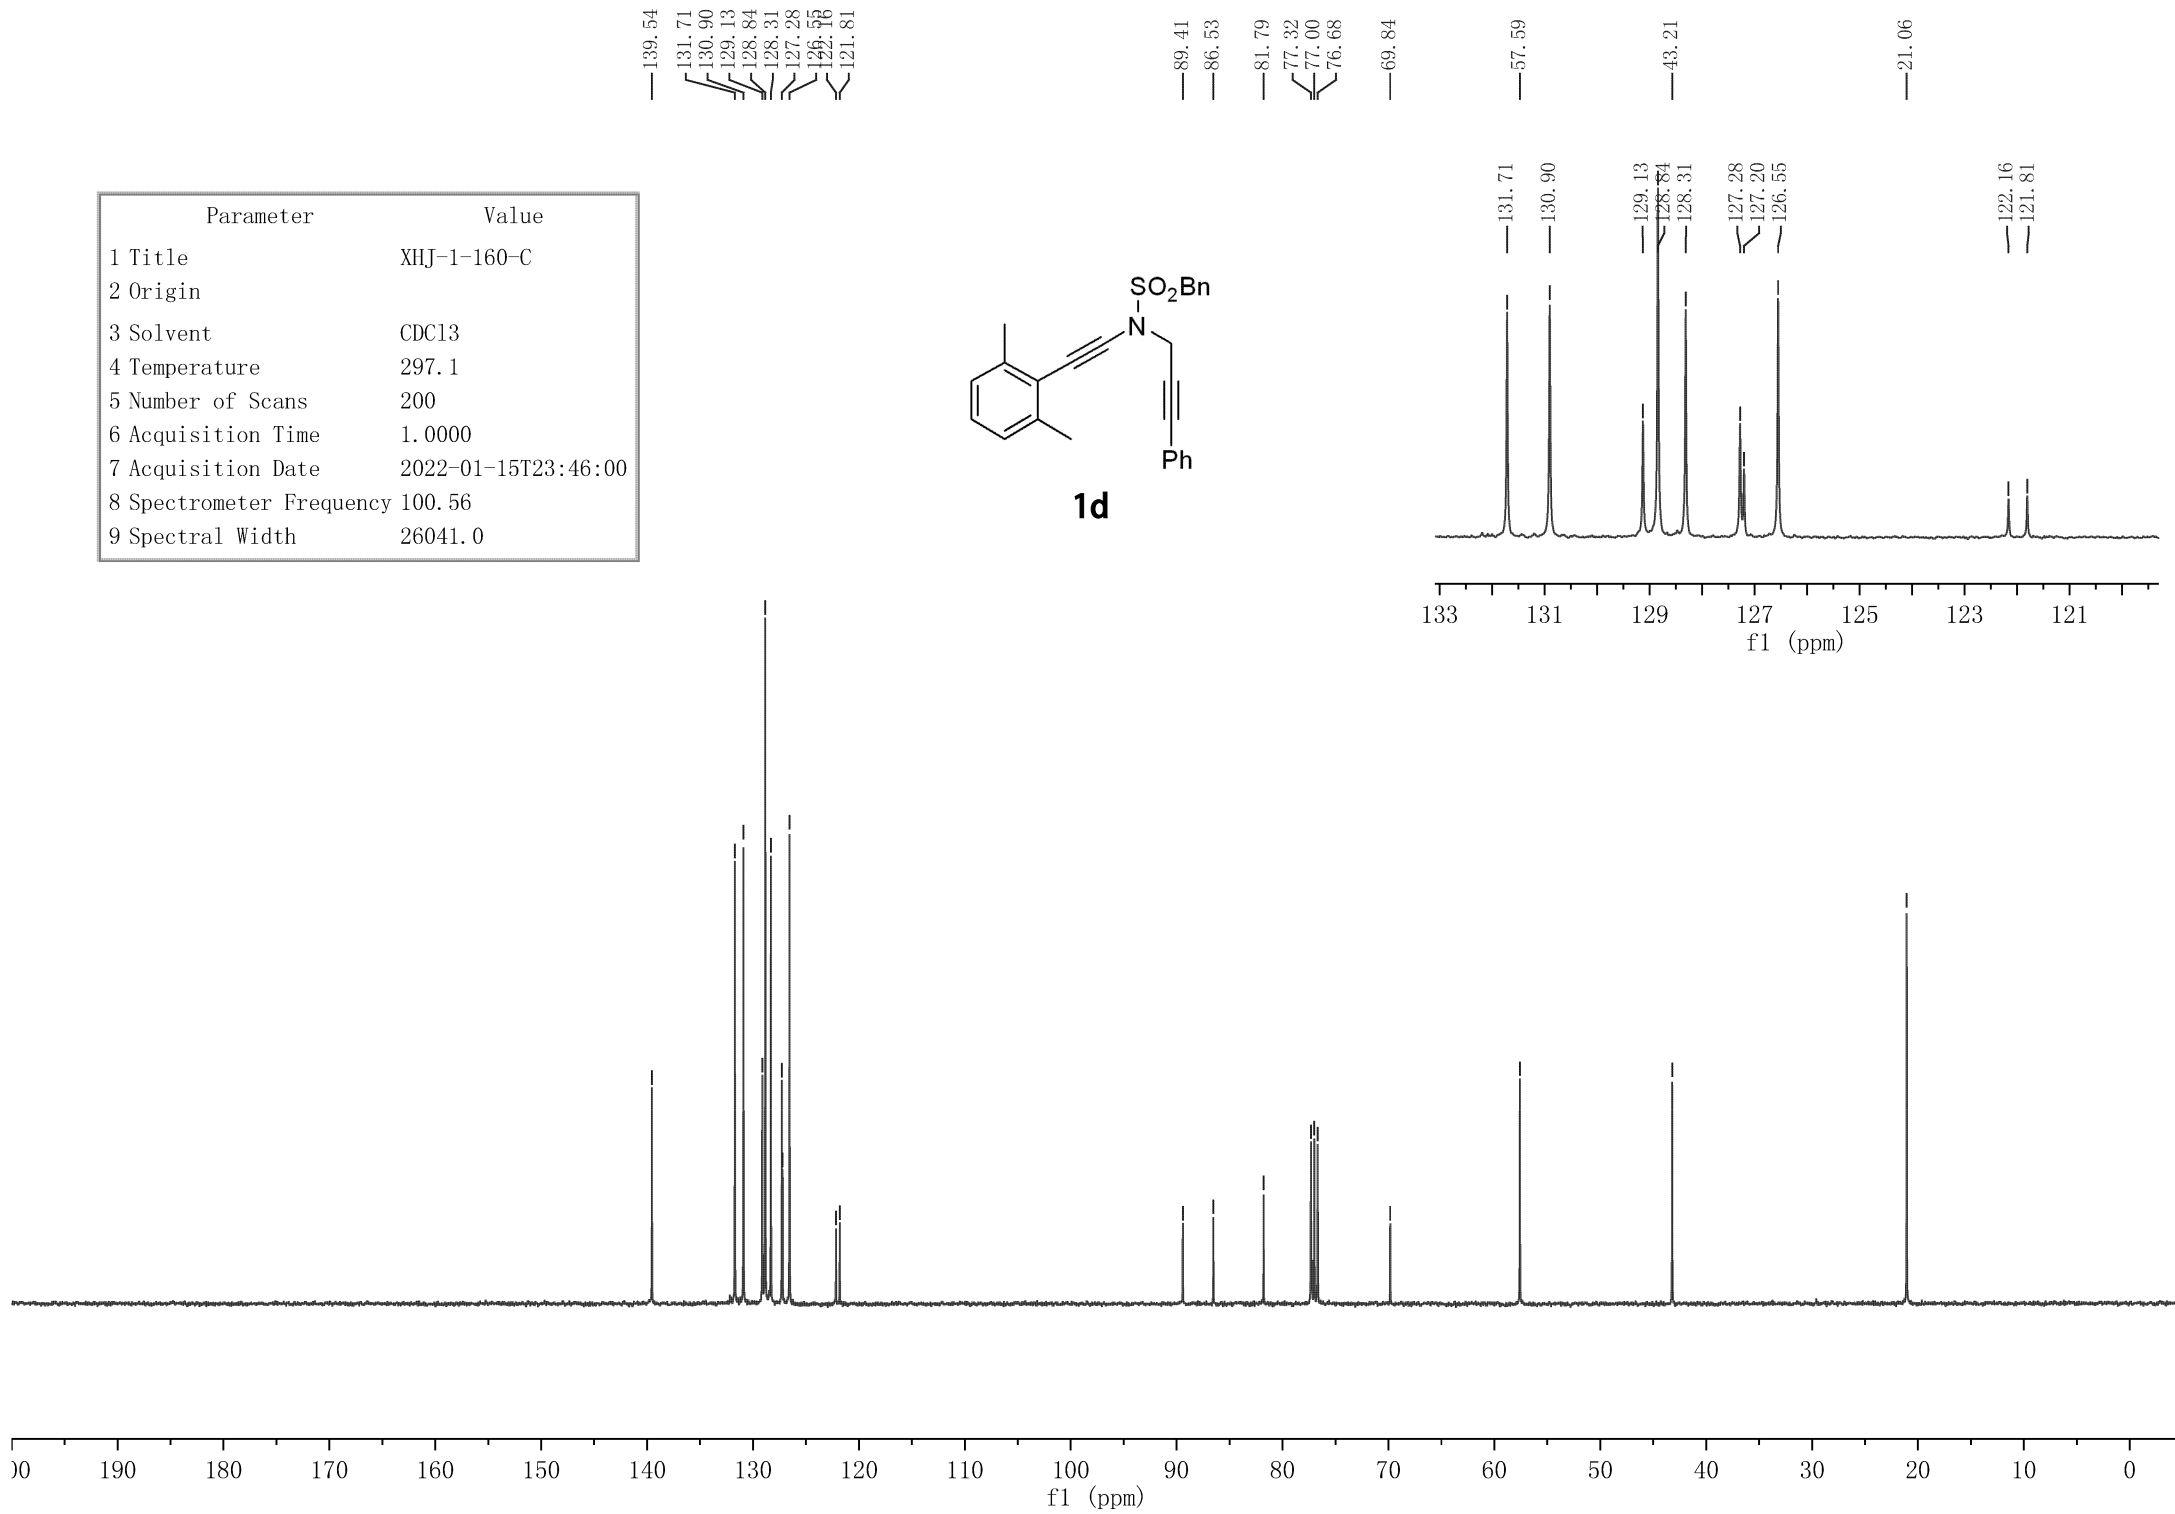

7.974  
7.952  
7.306  
7.289  
7.271  
7.254  
7.235  
7.217  
7.160  
7.140  
7.085  
7.065  
7.048  
7.010  
6.991  
6.923  
6.901

4.596  
3.747

2.377

| Parameter                | Value               |
|--------------------------|---------------------|
| 1 Title                  | XHJ-1-152-Mbs-H     |
| 2 Origin                 |                     |
| 3 Solvent                | CDCl <sub>3</sub>   |
| 4 Temperature            | 297.1               |
| 5 Number of Scans        | 16                  |
| 6 Acquisition Time       | 4.0002              |
| 7 Acquisition Date       | 2022-01-14T16:31:04 |
| 8 Spectrometer Frequency | 399.93              |
| 9 Spectral Width         | 8012.0              |

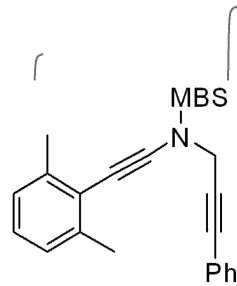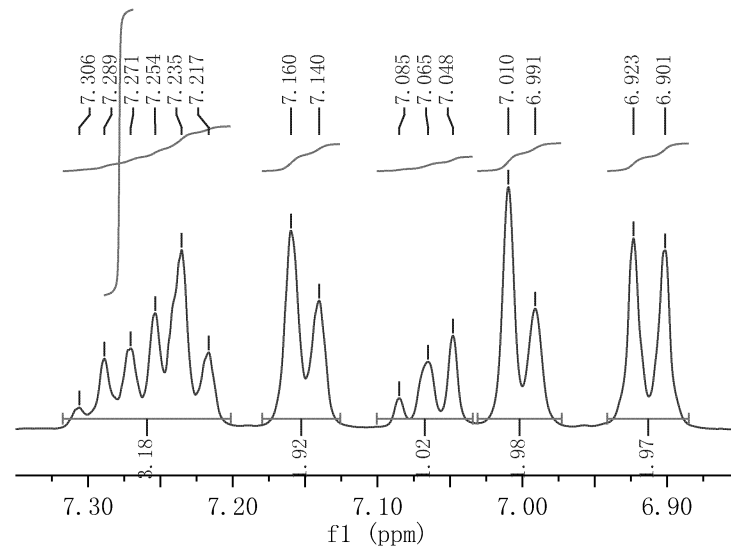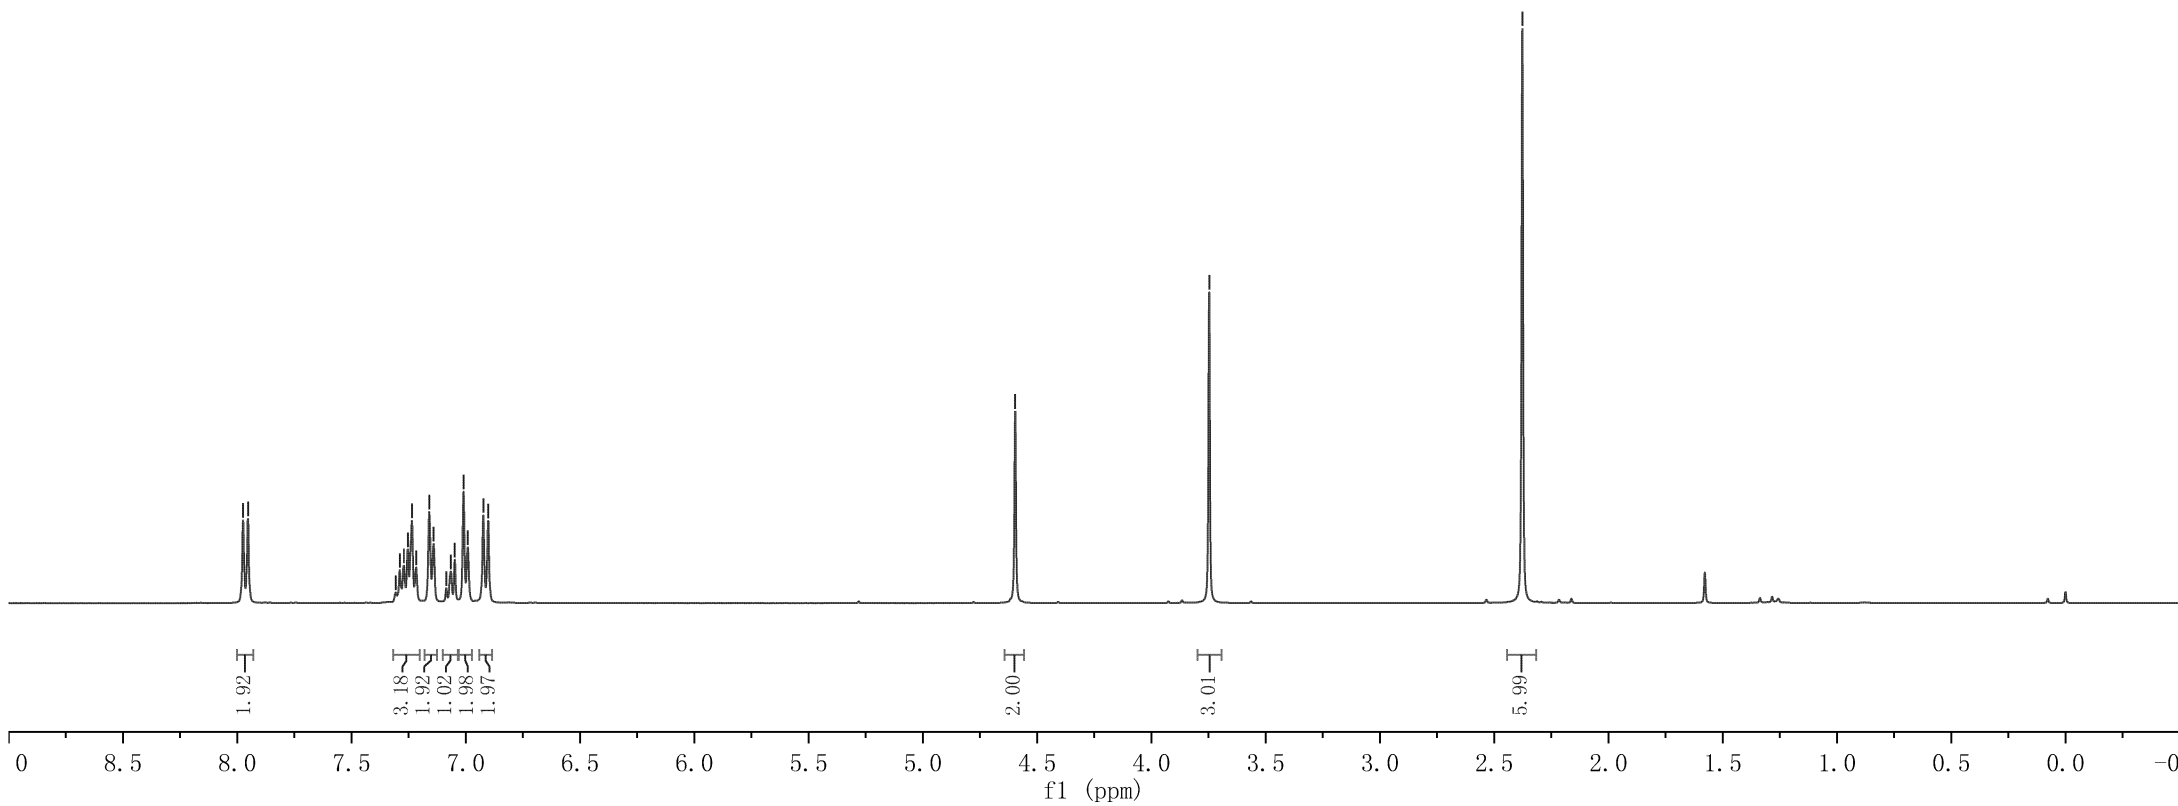

| Parameter                | Value               |
|--------------------------|---------------------|
| 1 Title                  | XHJ-1-152-Mbs-C     |
| 2 Origin                 |                     |
| 3 Solvent                | CDC13               |
| 4 Temperature            | 297.2               |
| 5 Number of Scans        | 200                 |
| 6 Acquisition Time       | 1.0000              |
| 7 Acquisition Date       | 2022-01-14T16:39:50 |
| 8 Spectrometer Frequency | 100.56              |
| 9 Spectral Width         | 26041.0             |

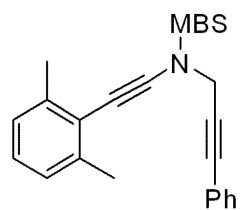

**1e**

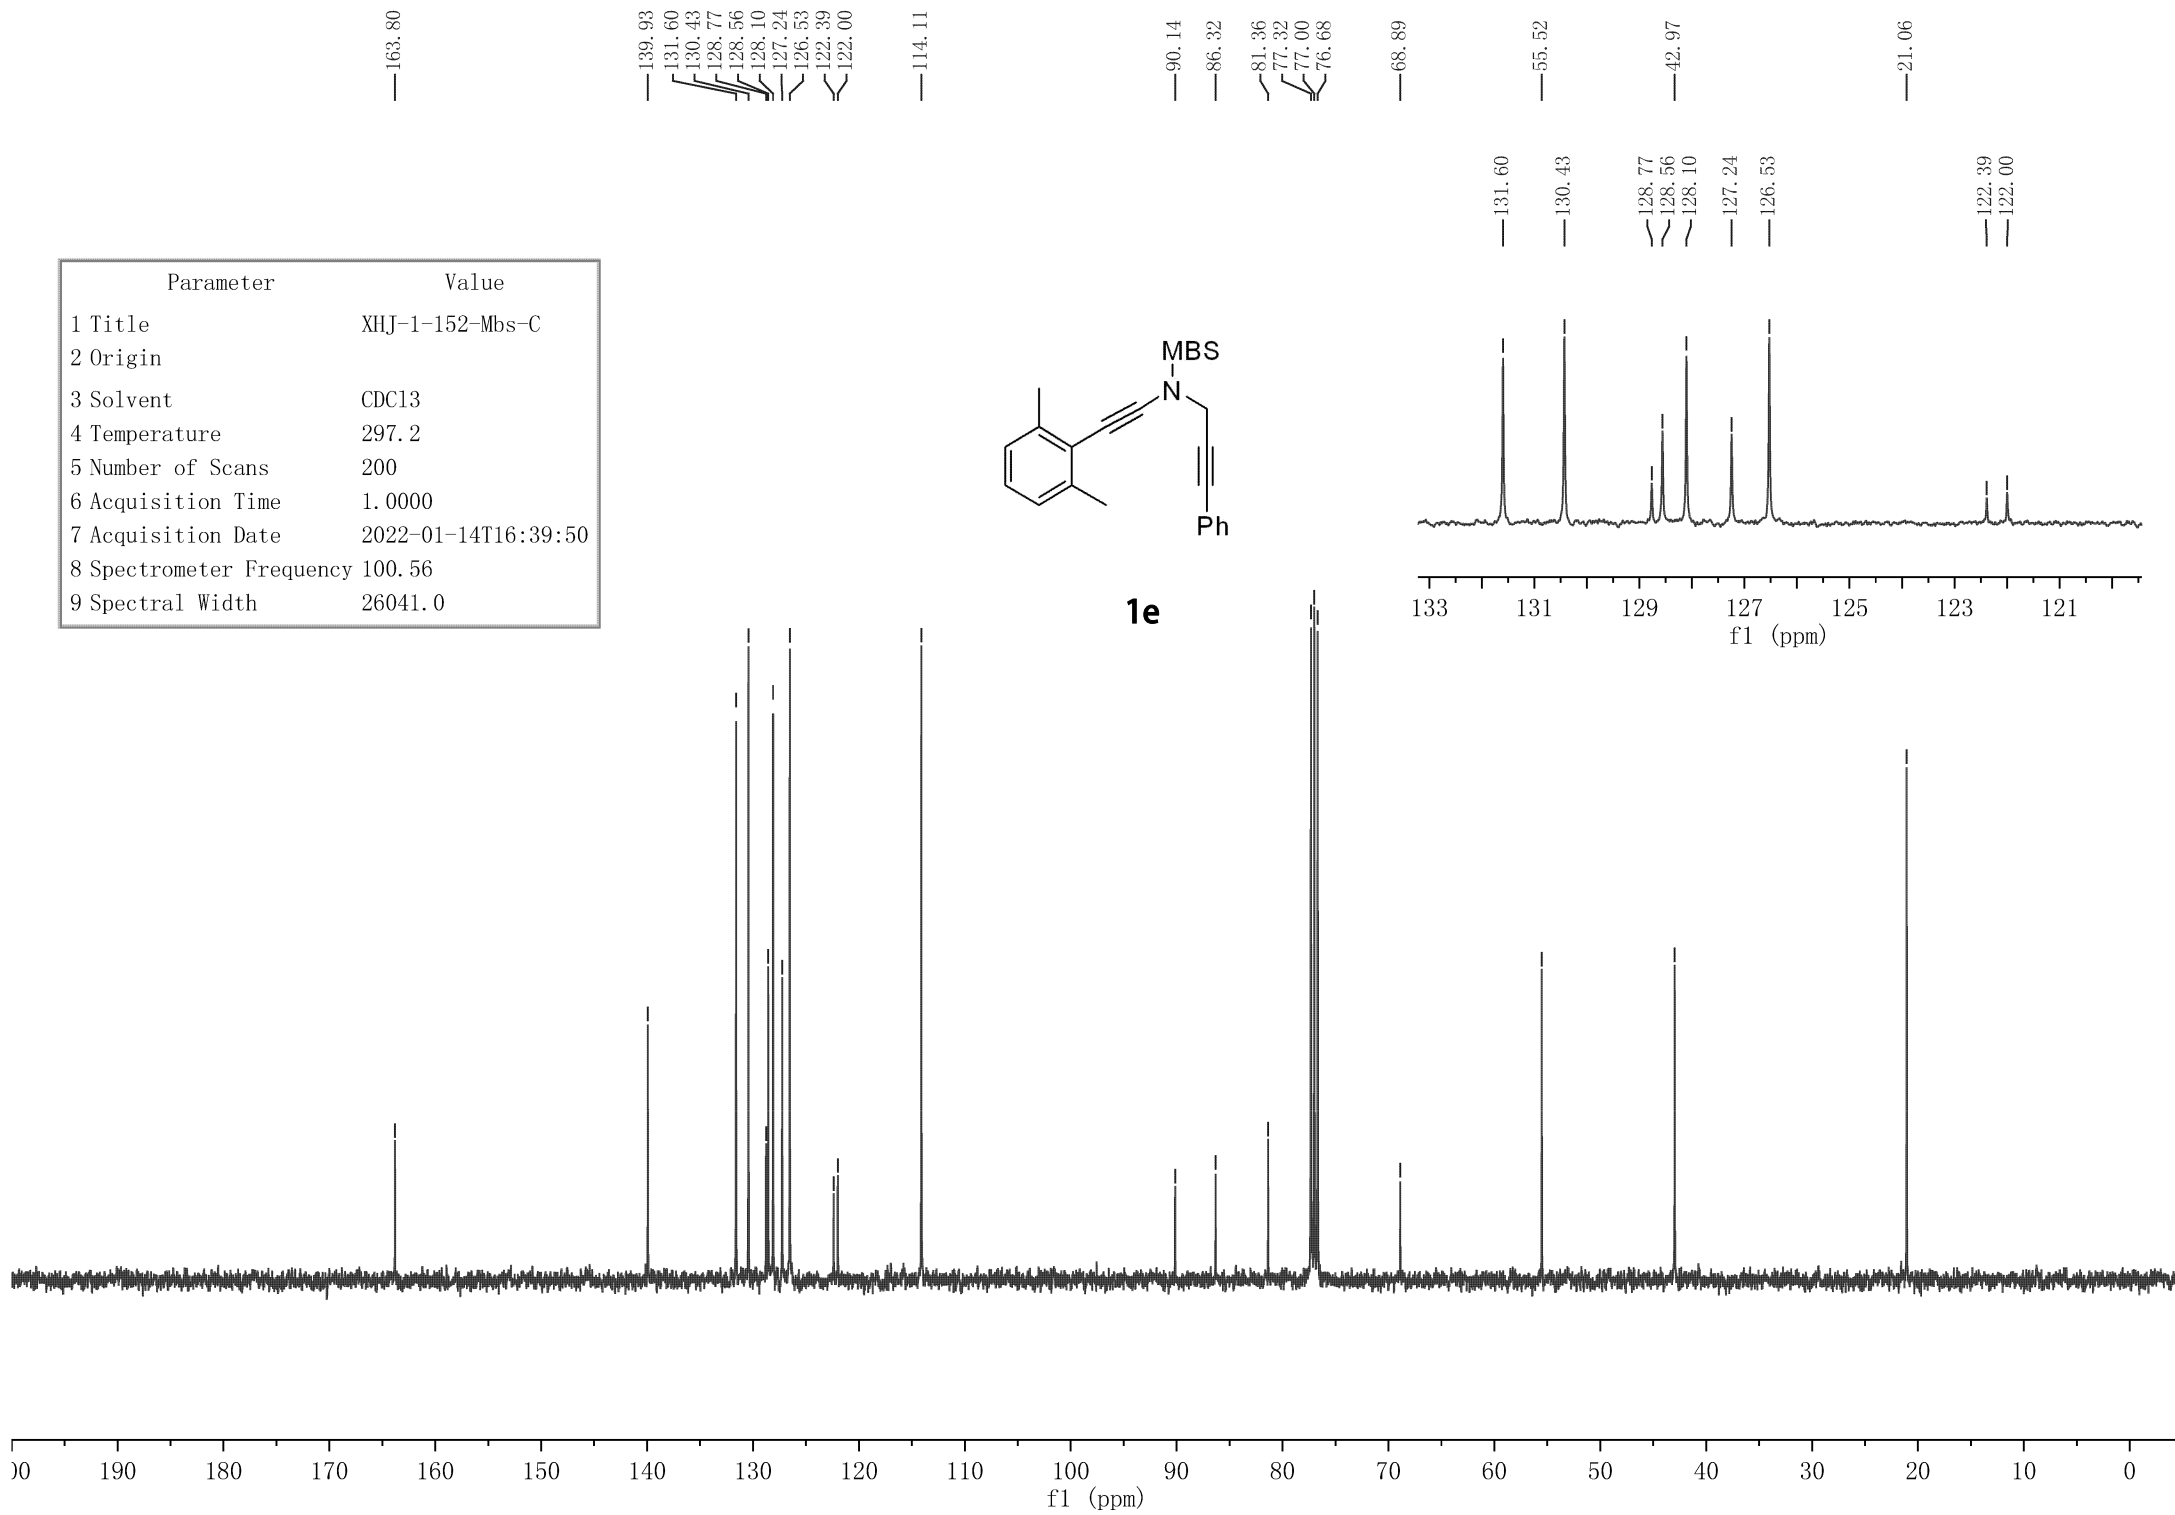

| Parameter                | Value               |
|--------------------------|---------------------|
| 1 Title                  | XHJ-1-119-H         |
| 2 Origin                 |                     |
| 3 Solvent                | CDC13               |
| 4 Temperature            | 297.4               |
| 5 Number of Scans        | 16                  |
| 6 Acquisition Time       | 4.0002              |
| 7 Acquisition Date       | 2022-01-20T04:15:52 |
| 8 Spectrometer Frequency | 399.93              |
| 9 Spectral Width         | 8012.0              |

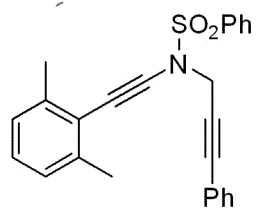

**1f**

8.055  
8.035  
7.603  
7.584  
7.567  
7.509  
7.491  
7.471  
7.286  
7.269  
7.251  
7.235  
7.214  
7.158  
7.139  
7.085  
7.068  
7.048  
7.005  
6.987

4.631

2.359

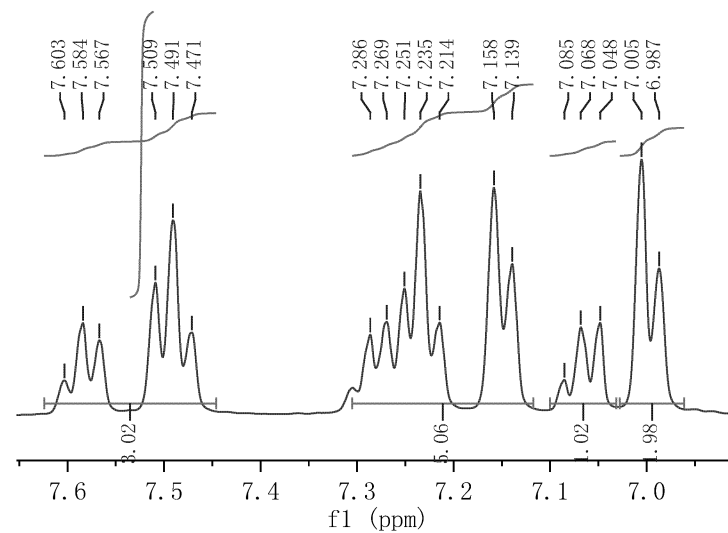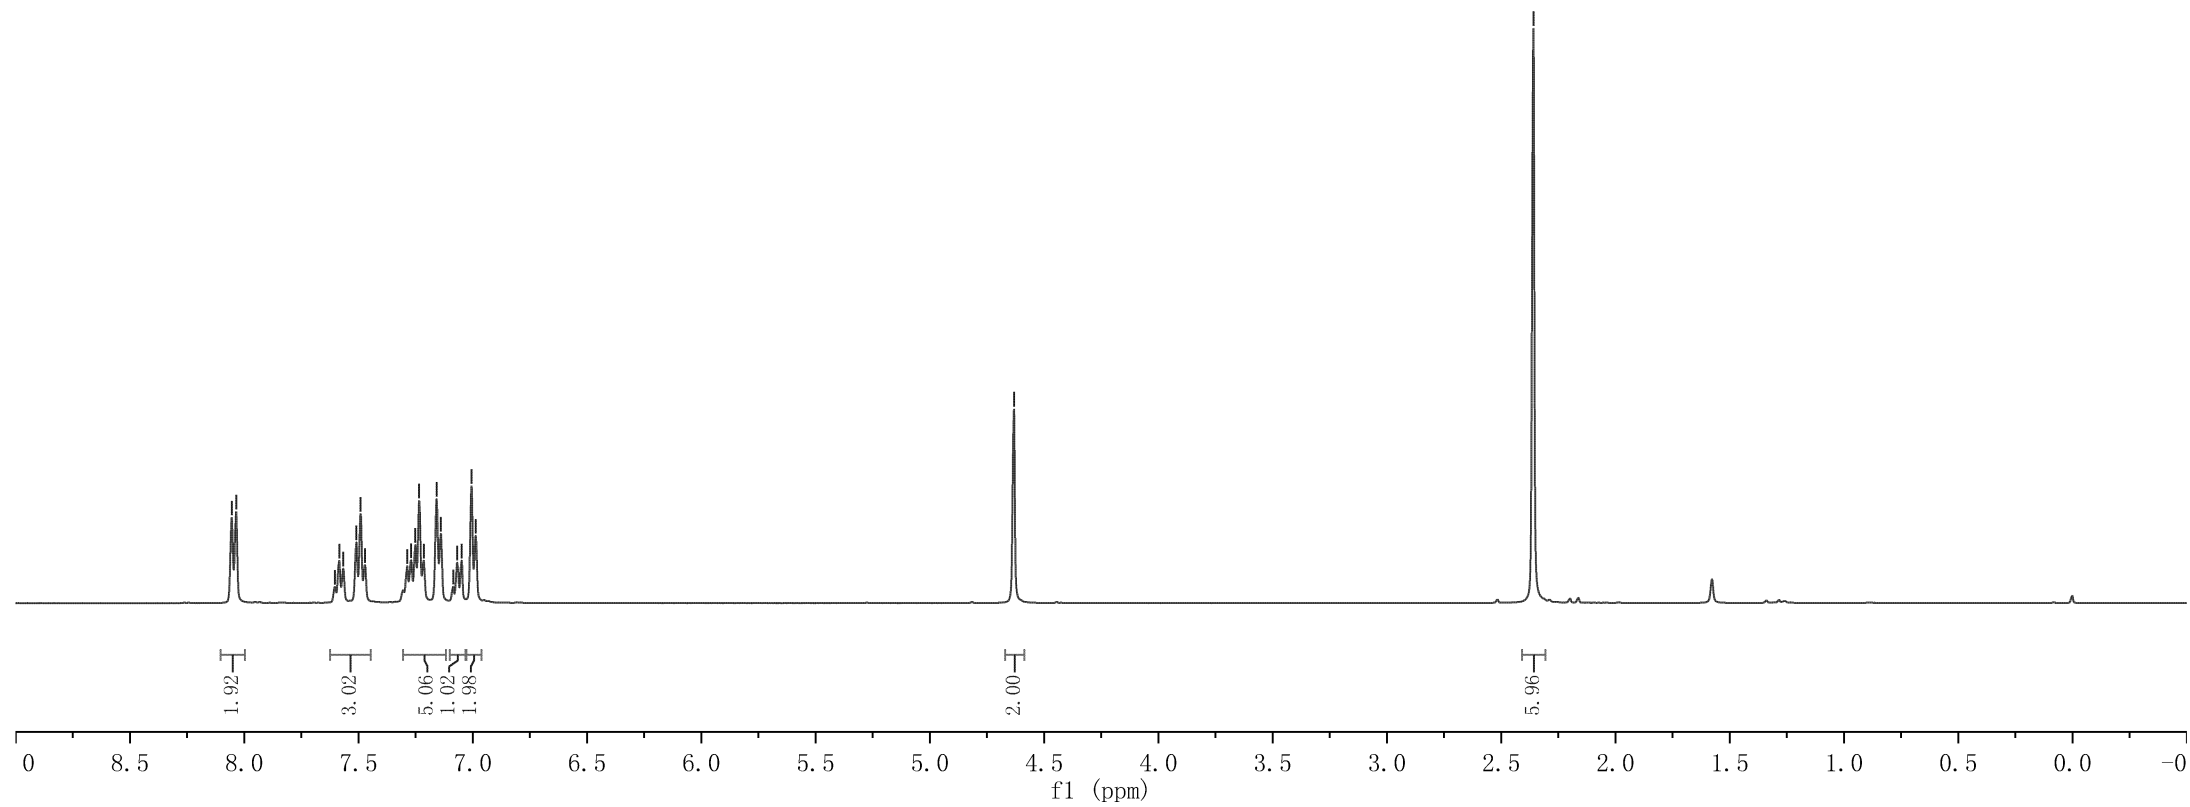



| Parameter                | Value               |
|--------------------------|---------------------|
| 1 Title                  | XIJ-1-119-C         |
| 2 Origin                 |                     |
| 3 Solvent                | CDC13               |
| 4 Temperature            | 297.5               |
| 5 Number of Scans        | 200                 |
| 6 Acquisition Time       | 1.0000              |
| 7 Acquisition Date       | 2022-01-20T04:24:55 |
| 8 Spectrometer Frequency | 100.56              |
| 9 Spectral Width         | 26041.0             |

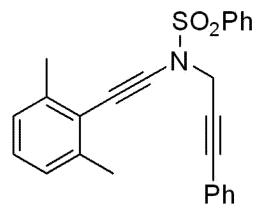

**1f**

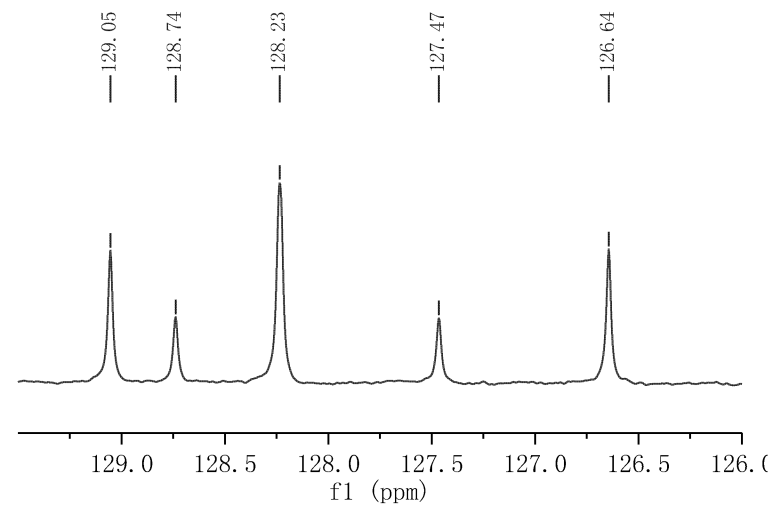

140.02  
137.29  
133.73  
131.60  
128.95  
128.64  
128.13  
127.36  
126.54  
122.22  
121.84

89.64  
86.46  
81.11  
77.32  
77.00  
76.68  
69.00

43.06  
21.03

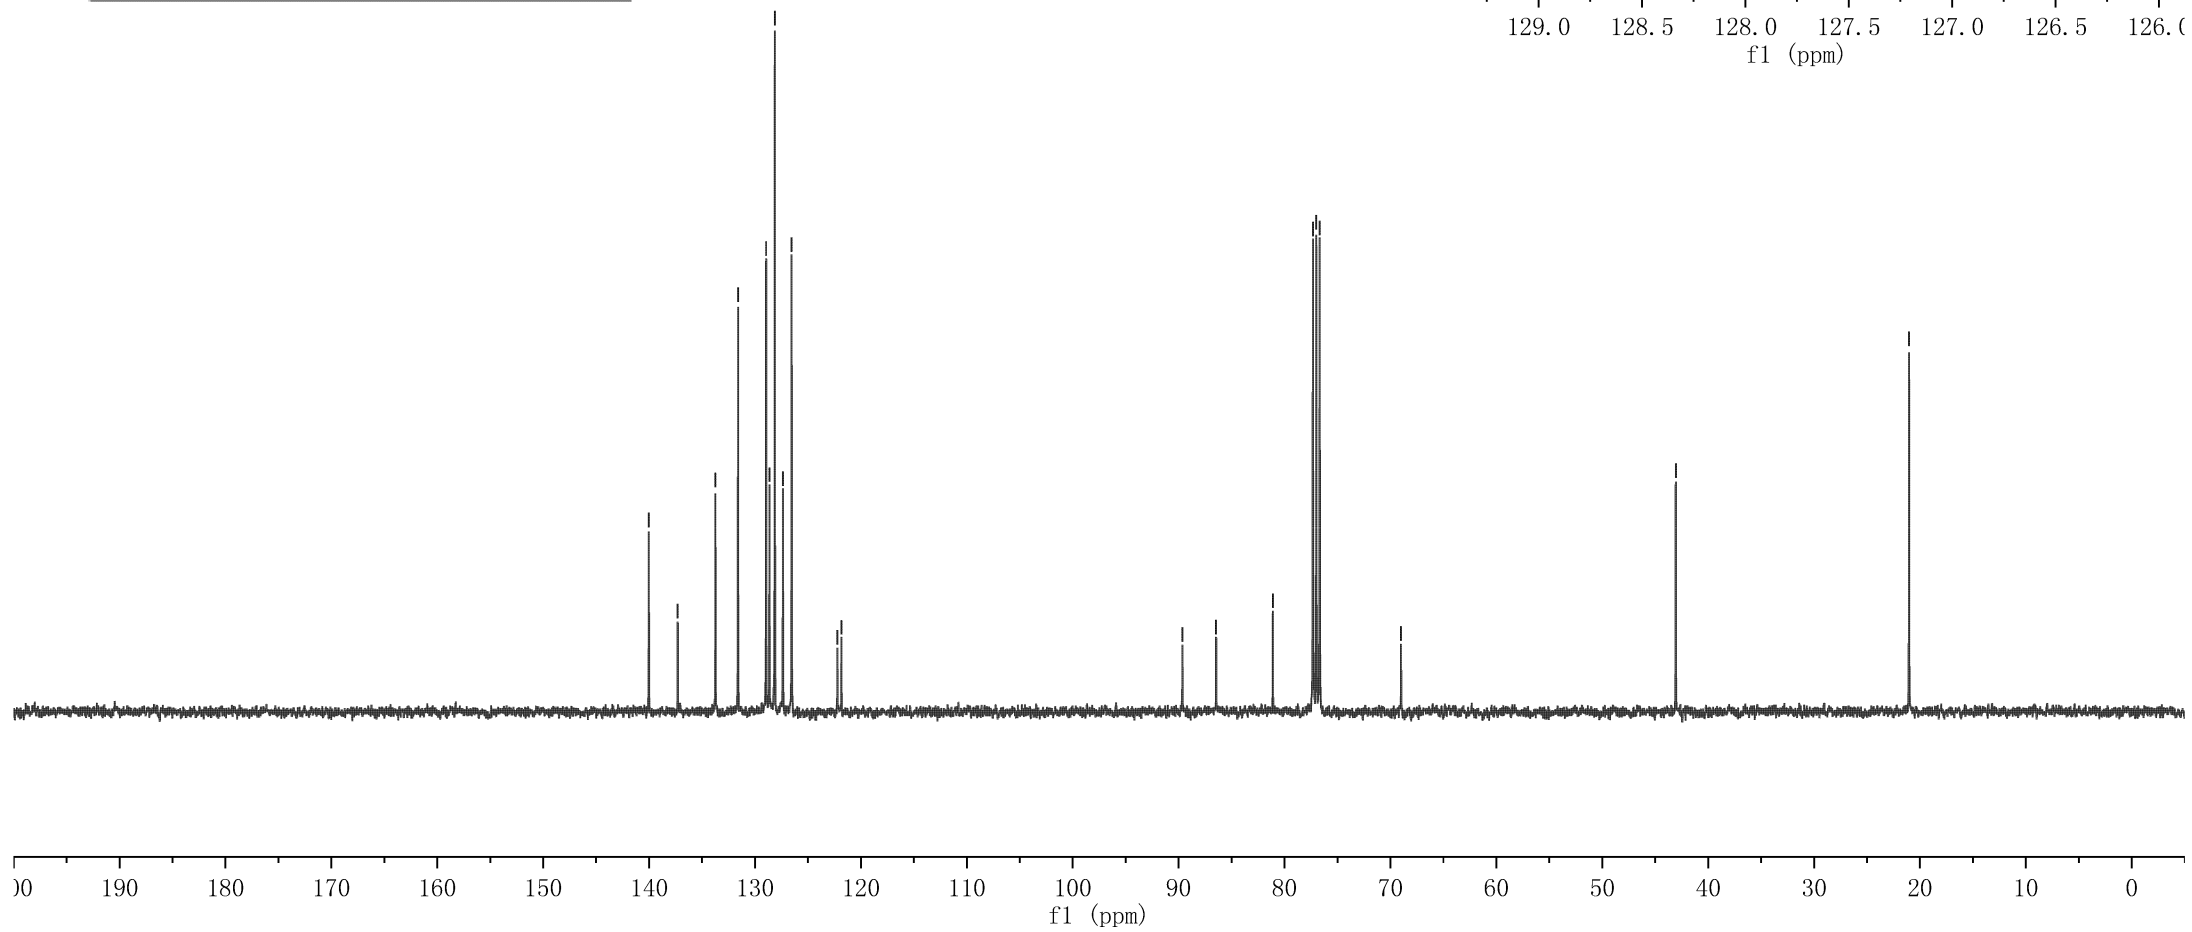

| Parameter                | Value               |
|--------------------------|---------------------|
| 1 Title                  | XHJ-1-183-H         |
| 2 Origin                 |                     |
| 3 Solvent                | CDC13               |
| 4 Temperature            | 294.5               |
| 5 Number of Scans        | 16                  |
| 6 Acquisition Time       | 4.0002              |
| 7 Acquisition Date       | 2022-02-21T09:56:19 |
| 8 Spectrometer Frequency | 399.93              |
| 9 Spectral Width         | 8012.0              |

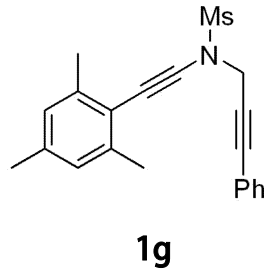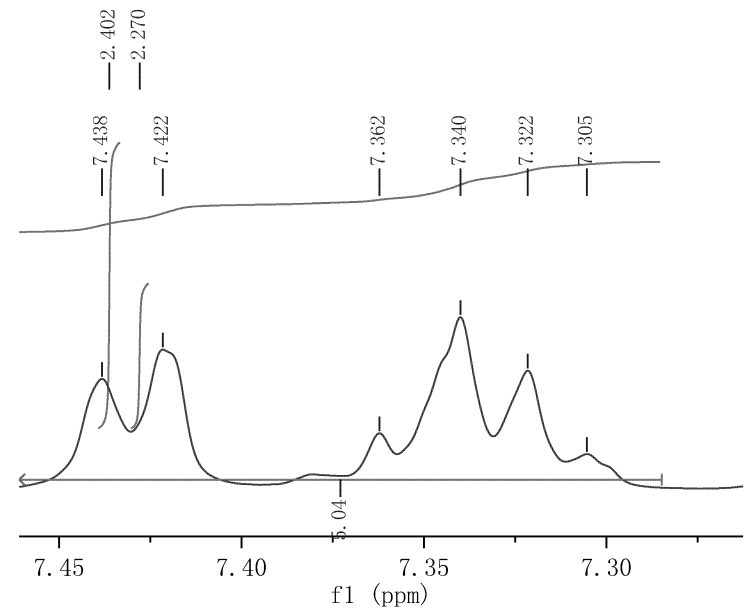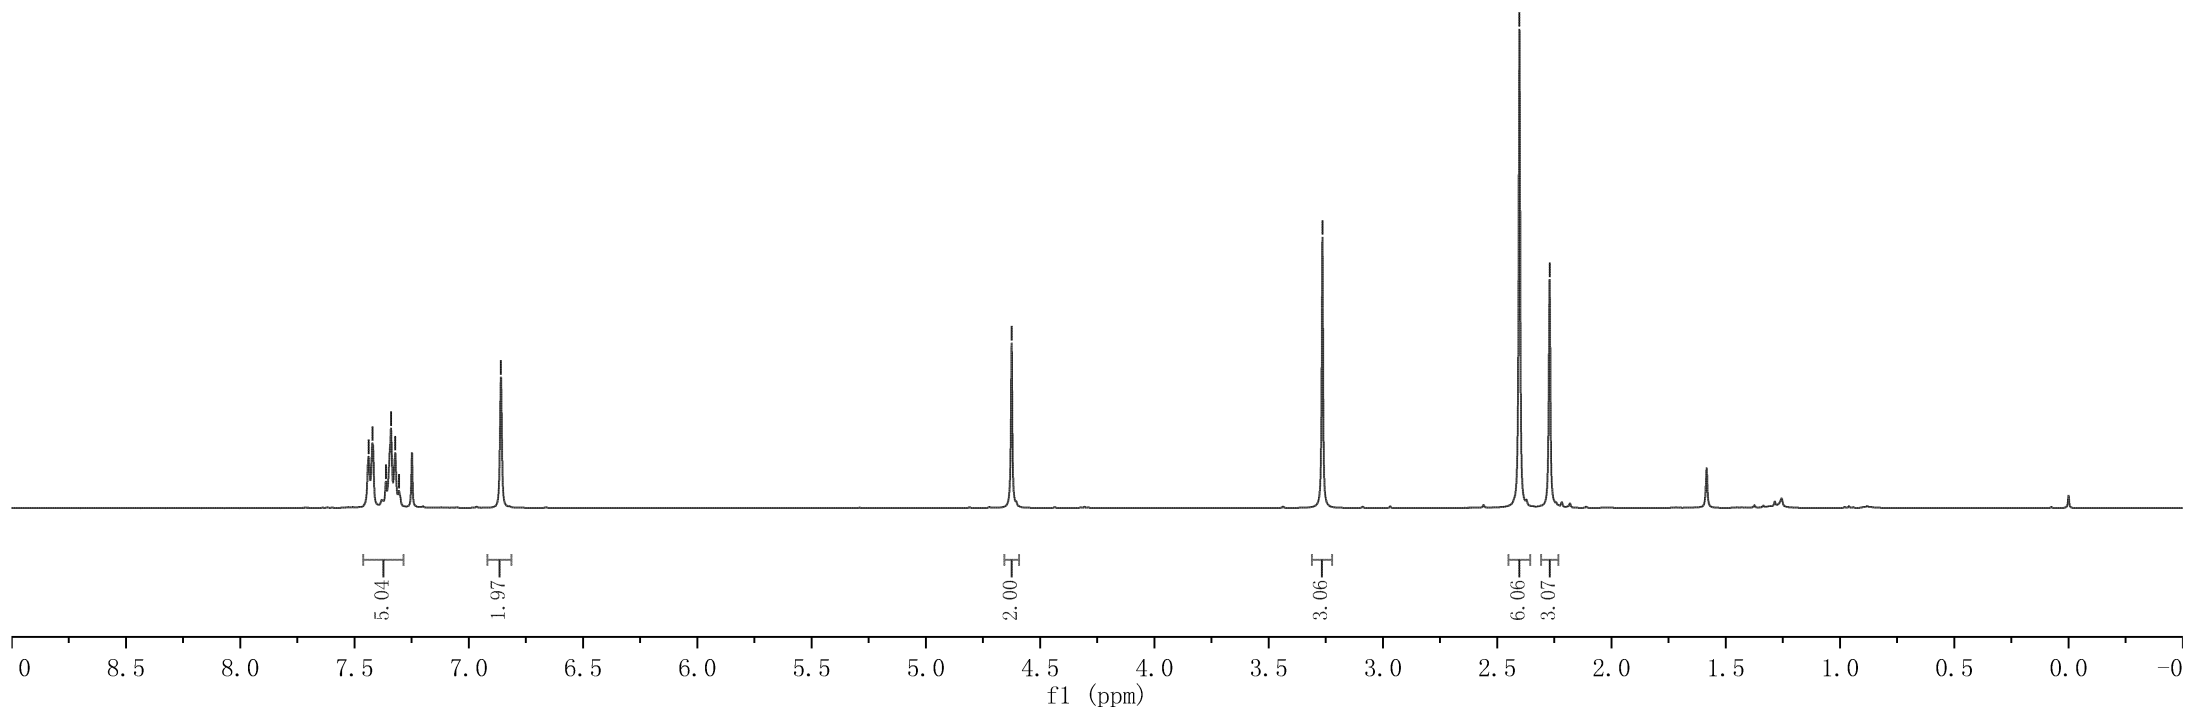

| Parameter                | Value               |
|--------------------------|---------------------|
| 1 Title                  | XHJ-1-183-C         |
| 2 Origin                 |                     |
| 3 Solvent                | CDC13               |
| 4 Temperature            | 294.8               |
| 5 Number of Scans        | 400                 |
| 6 Acquisition Time       | 1.0000              |
| 7 Acquisition Date       | 2022-02-21T10:12:08 |
| 8 Spectrometer Frequency | 100.56              |
| 9 Spectral Width         | 26041.0             |

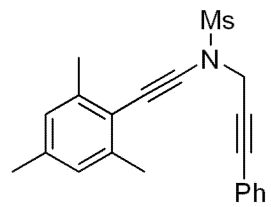

**1g**

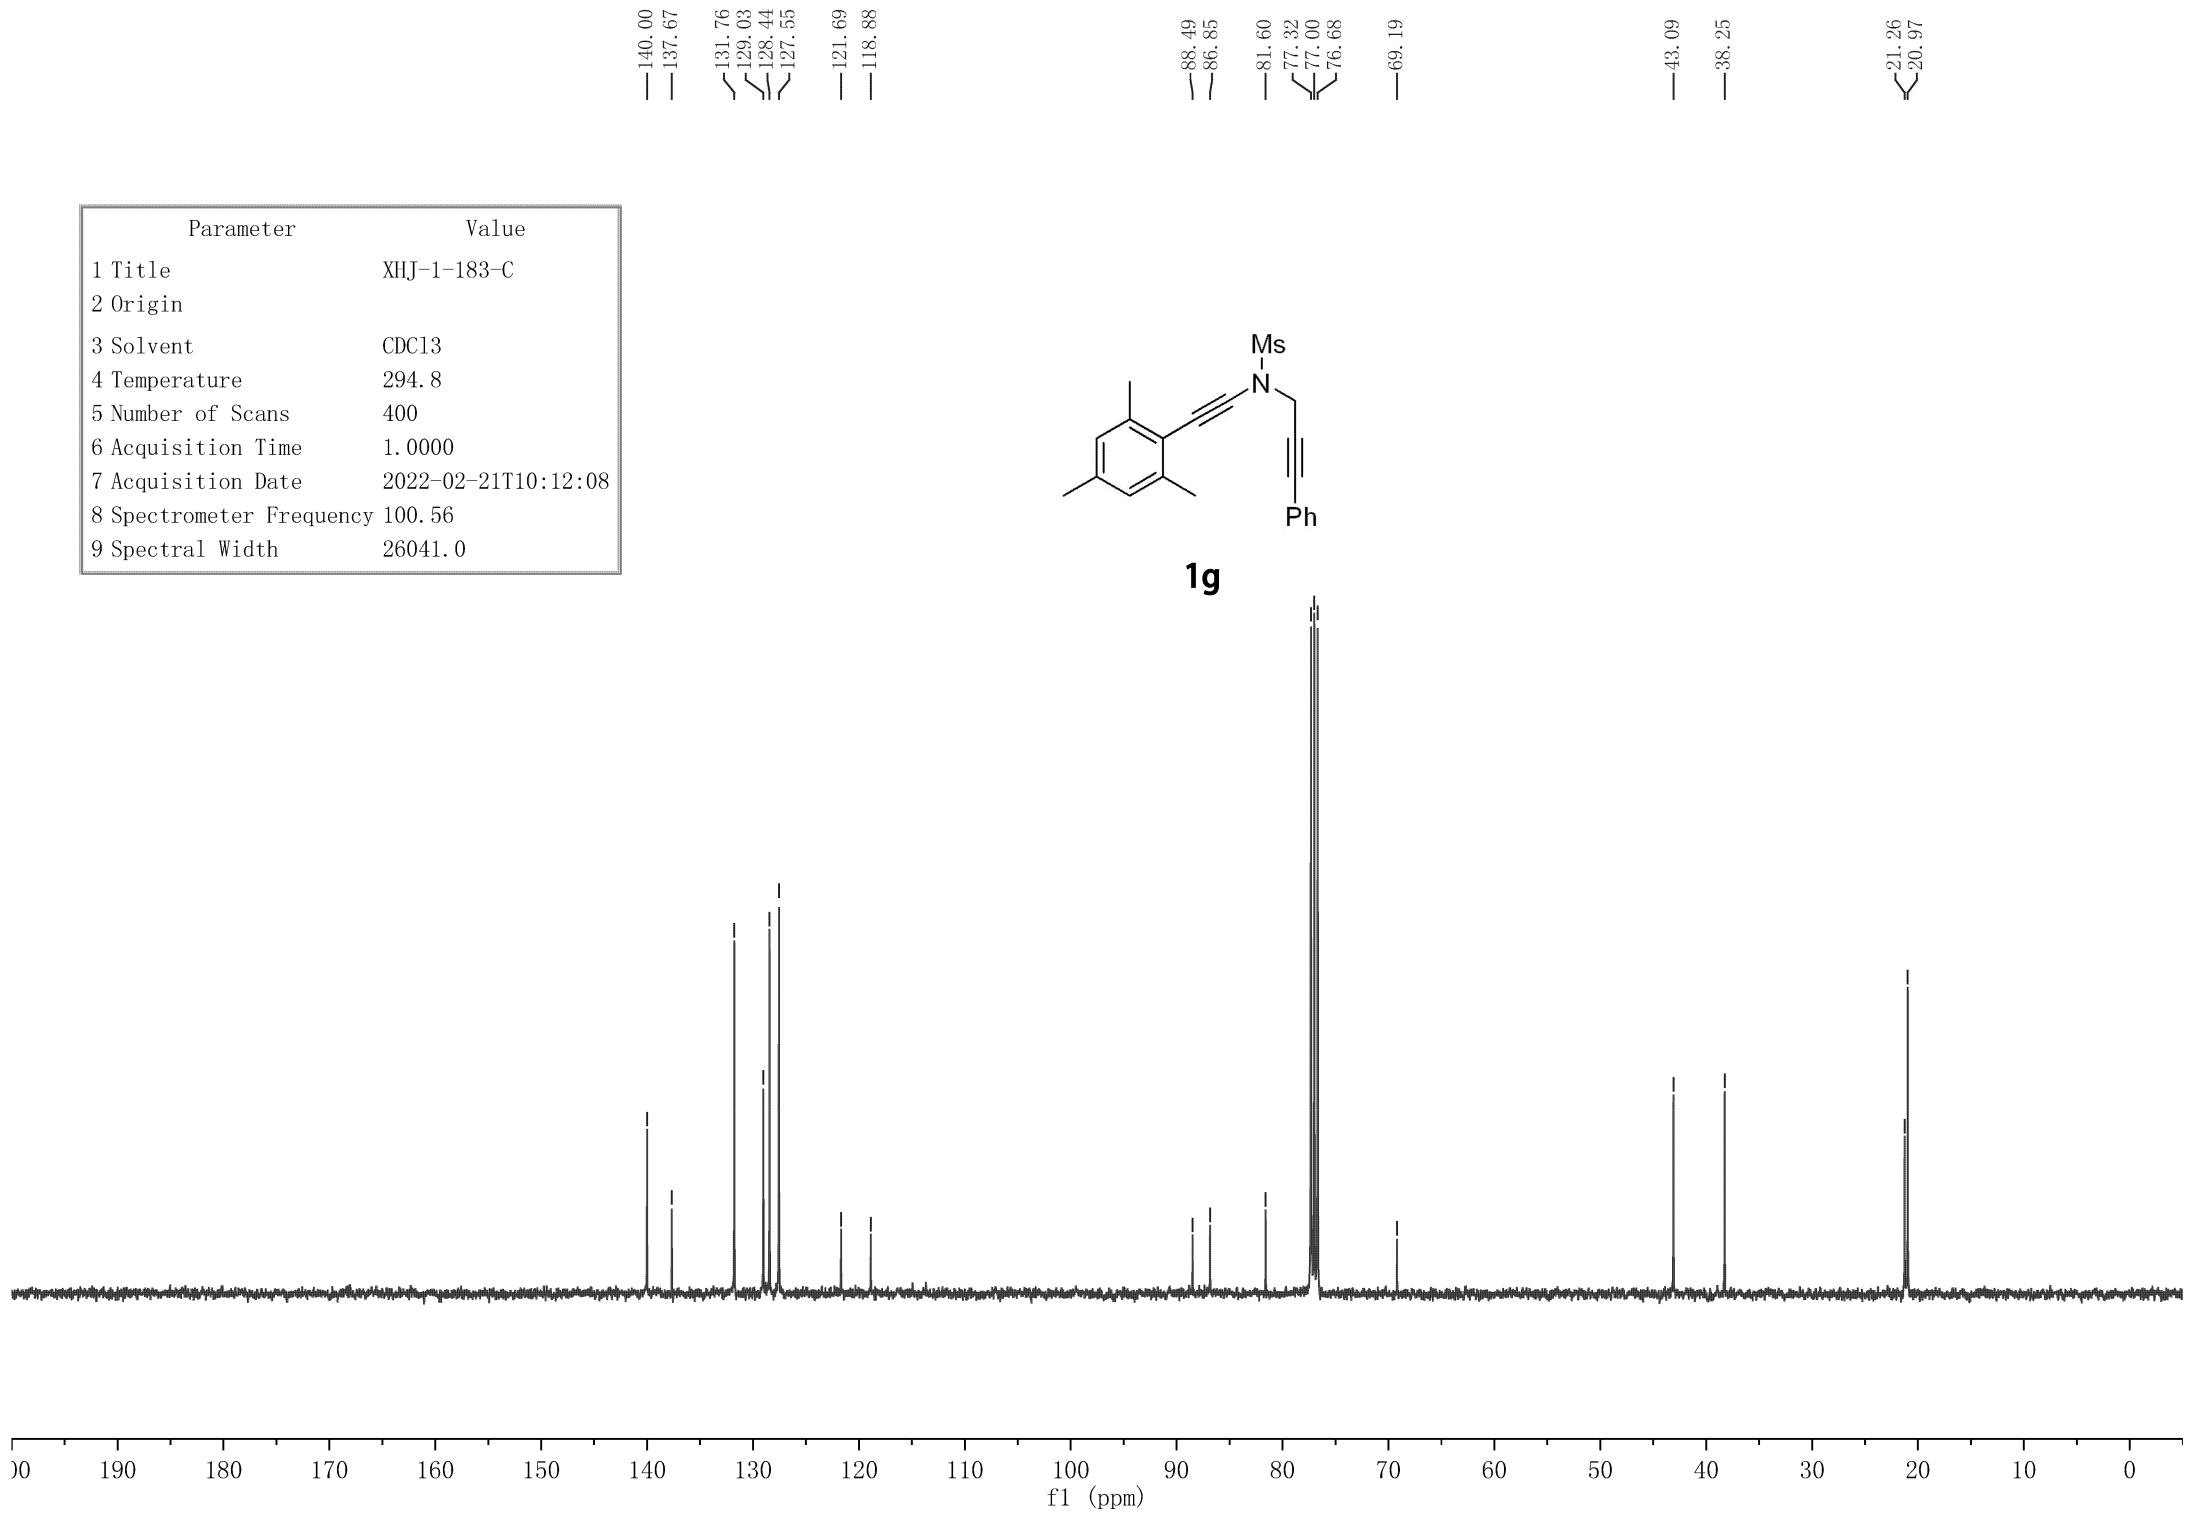

7.438  
7.422  
7.418  
7.383  
7.364  
7.352  
7.348  
7.342  
7.324  
7.308  
7.302  
6.752  
6.729

| Parameter                | Value               |
|--------------------------|---------------------|
| 1 Title                  | XHJ-1-230-H         |
| 2 Origin                 | Bruker BioSpin GmbH |
| 3 Solvent                | CDCl3               |
| 4 Temperature            | 298.0               |
| 5 Number of Scans        | 15                  |
| 6 Acquisition Time       | 4.0894              |
| 7 Acquisition Date       | 2022-03-15T15:32:35 |
| 8 Spectrometer Frequency | 400.13              |
| 9 Spectral Width         | 8012.8              |

4.622

3.263

2.422

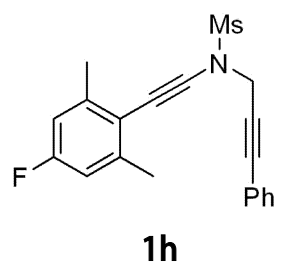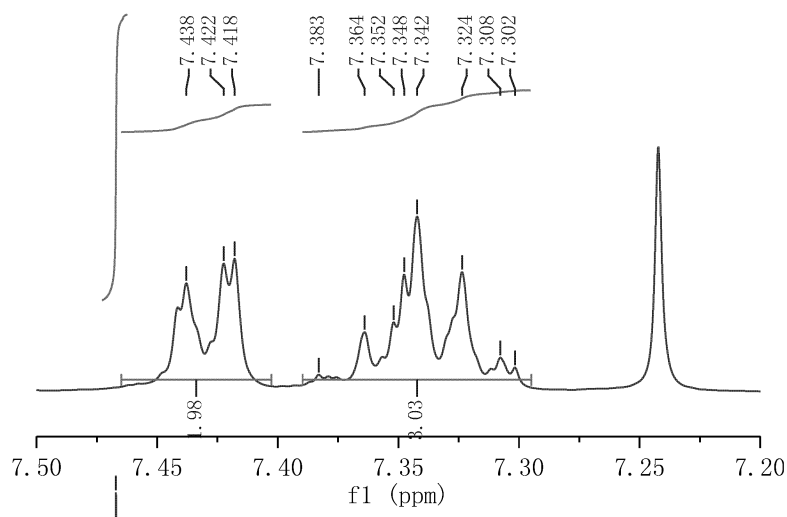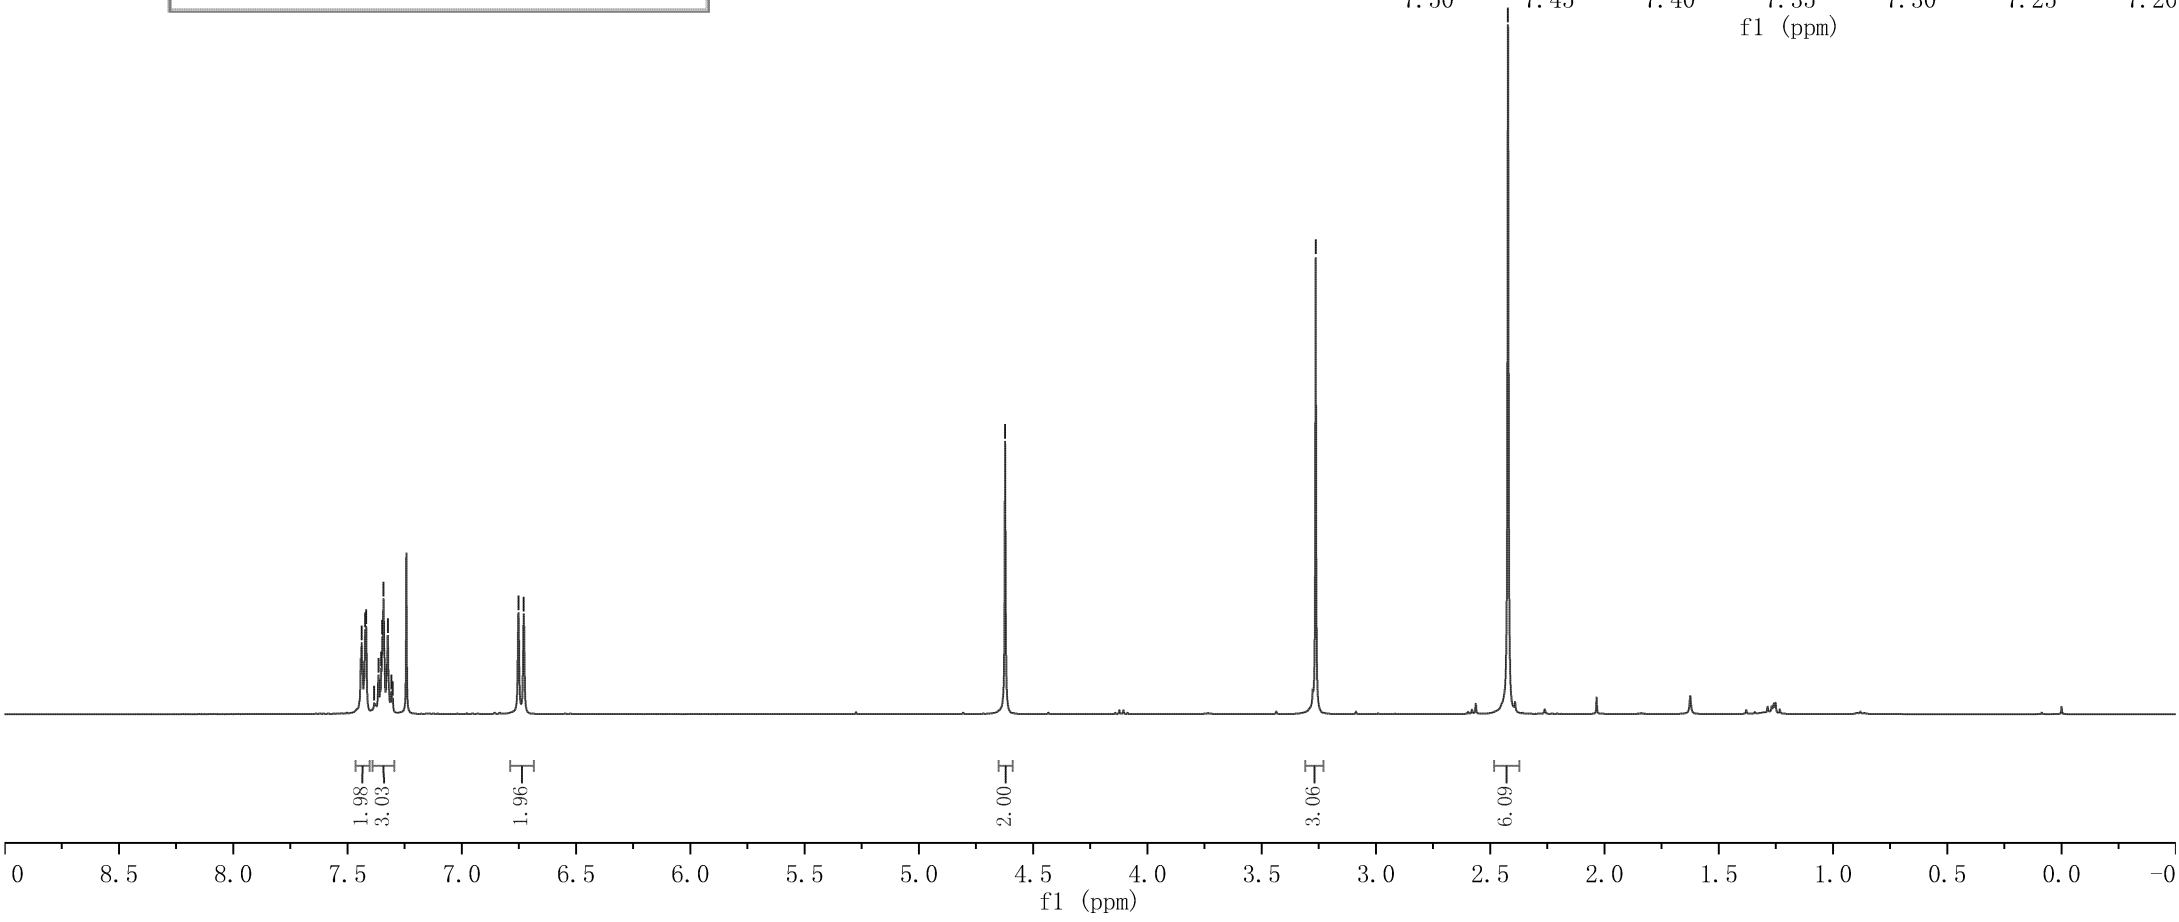

| Parameter                | Value               |
|--------------------------|---------------------|
| 1 Title                  | XHJ-1-230-C         |
| 2 Origin                 |                     |
| 3 Solvent                | CDC13               |
| 4 Temperature            | 297.5               |
| 5 Number of Scans        | 250                 |
| 6 Acquisition Time       | 1.0000              |
| 7 Acquisition Date       | 2022-03-15T19:26:07 |
| 8 Spectrometer Frequency | 100.56              |
| 9 Spectral Width         | 26041.0             |

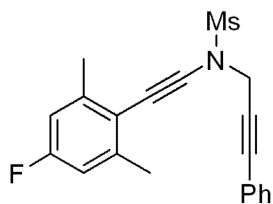

**1h**

162.97  
160.50

142.68  
142.59

131.71  
129.07  
128.44

121.59  
117.95  
117.92  
113.78  
113.57

88.79  
88.78  
86.91  
81.48  
77.32  
77.00  
76.68

68.22

42.96  
38.36

21.13  
21.12

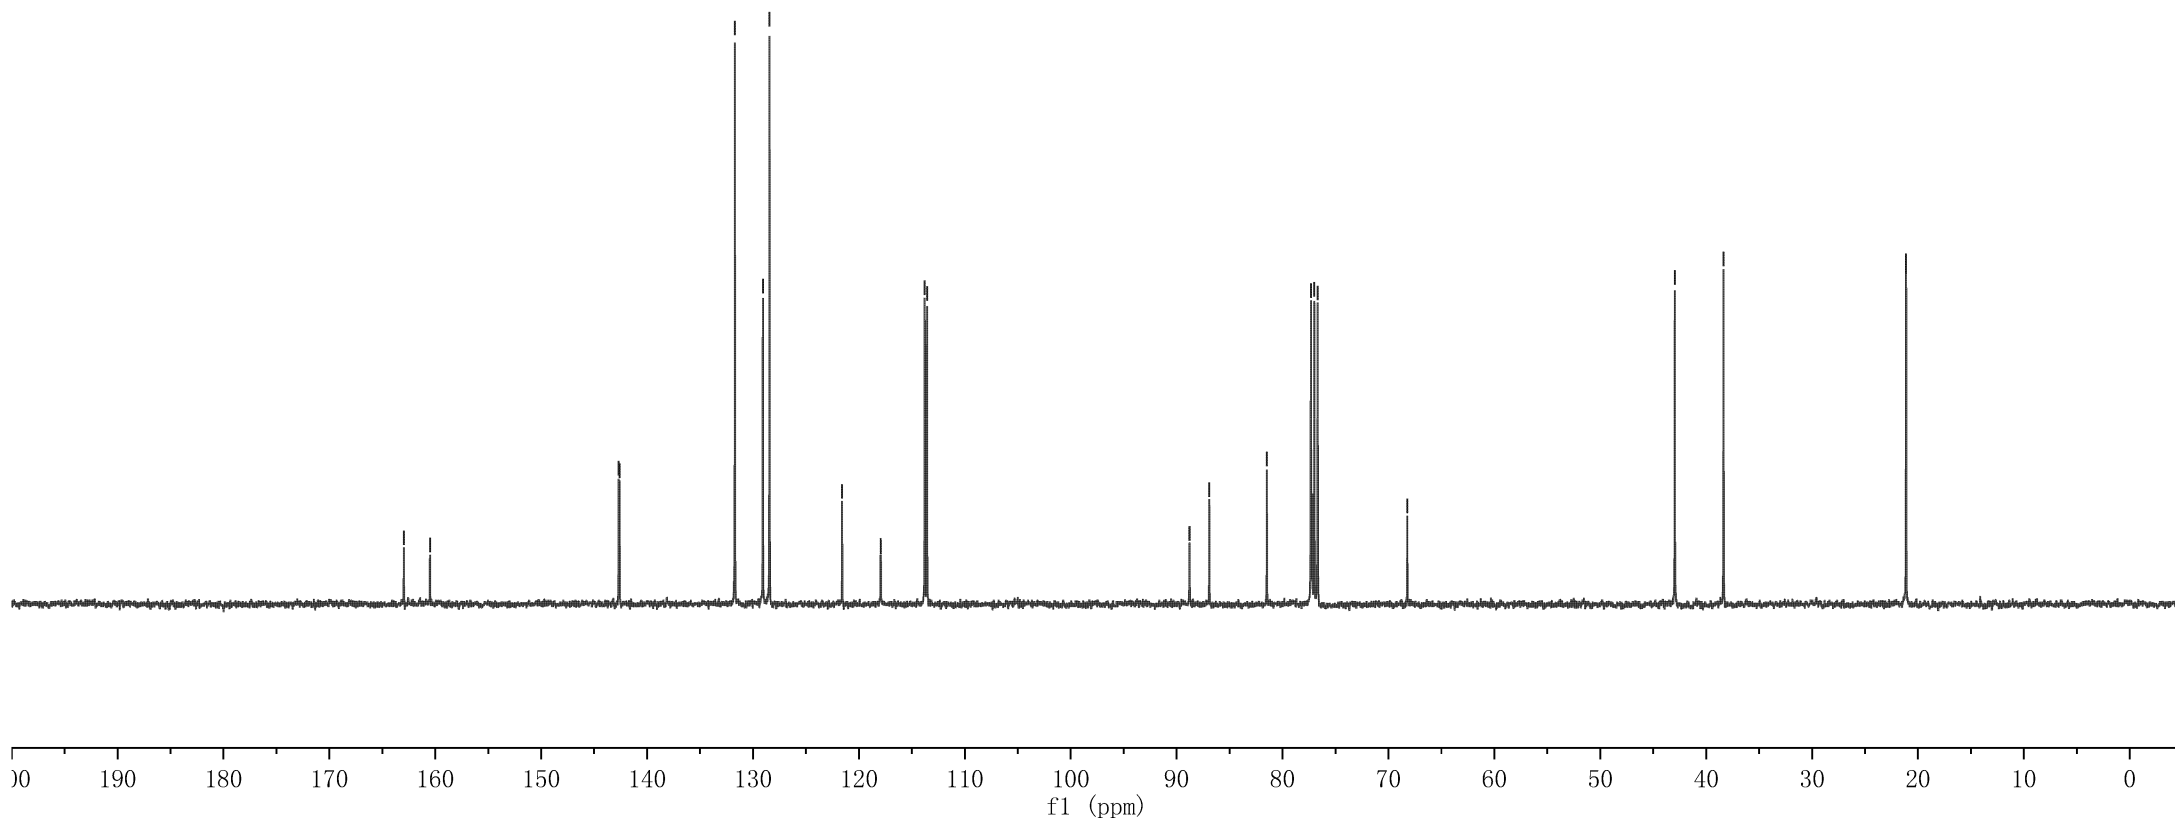

| Parameter                | Value               |
|--------------------------|---------------------|
| 1 Title                  | XHJ-1-230-F         |
| 2 Origin                 | Bruker BioSpin GmbH |
| 3 Solvent                | CDC13               |
| 4 Temperature            | 297.2               |
| 5 Number of Scans        | 16                  |
| 6 Acquisition Time       | 0.7340              |
| 7 Acquisition Date       | 2022-08-16T20:03:52 |
| 8 Spectrometer Frequency | 376.31              |
| 9 Spectral Width         | 89285.7             |

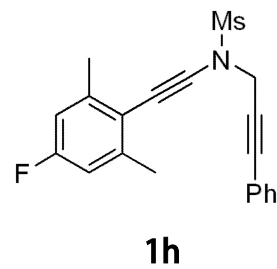

-112.72

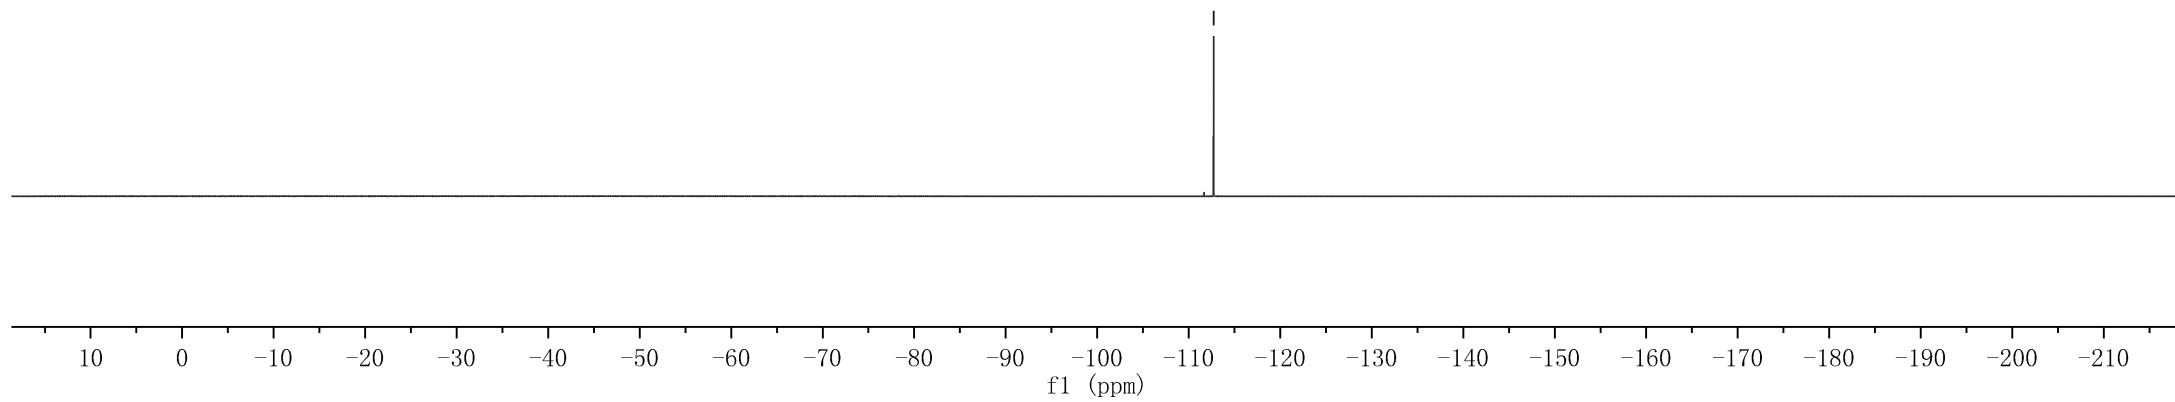

7.435  
7.416  
7.388  
7.369  
7.345  
7.327  
7.310  
7.028

4.632

3.266

2.402

| Parameter                | Value               |
|--------------------------|---------------------|
| 1 Title                  | XHJ-1-218-II        |
| 2 Origin                 |                     |
| 3 Solvent                | CDC13               |
| 4 Temperature            | 297.6               |
| 5 Number of Scans        | 16                  |
| 6 Acquisition Time       | 4.0002              |
| 7 Acquisition Date       | 2022-03-08T16:29:55 |
| 8 Spectrometer Frequency | 399.93              |
| 9 Spectral Width         | 8012.0              |

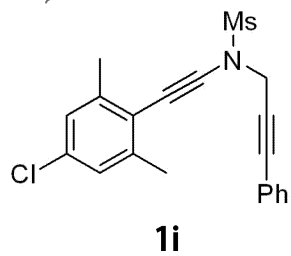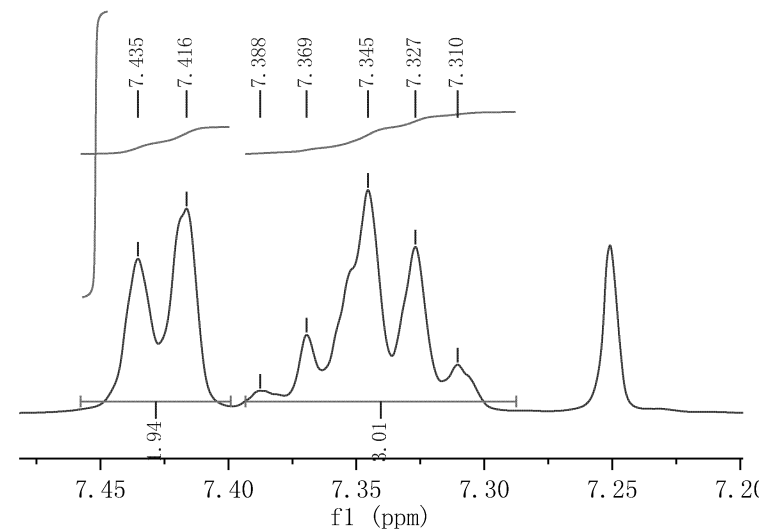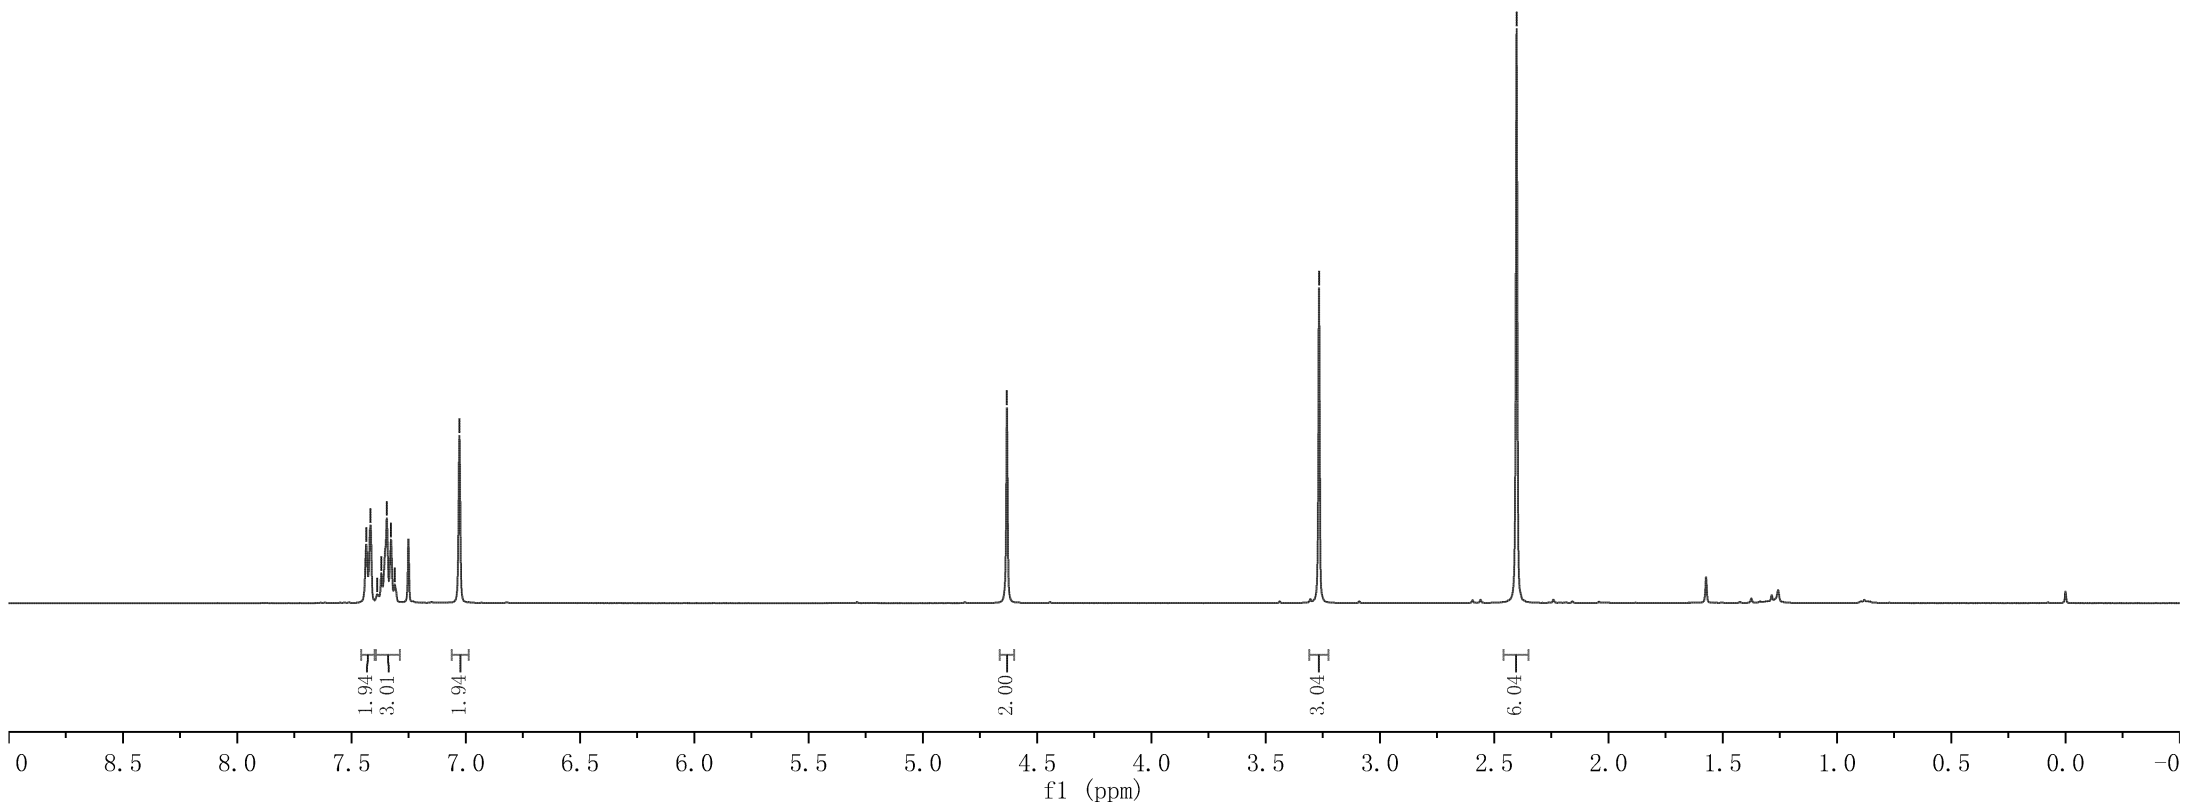

| Parameter                | Value               |
|--------------------------|---------------------|
| 1 Title                  | XHJ-1-218-C         |
| 2 Origin                 |                     |
| 3 Solvent                | CDC13               |
| 4 Temperature            | 297.8               |
| 5 Number of Scans        | 400                 |
| 6 Acquisition Time       | 1.0000              |
| 7 Acquisition Date       | 2022-03-08T16:45:34 |
| 8 Spectrometer Frequency | 100.56              |
| 9 Spectral Width         | 26041.0             |

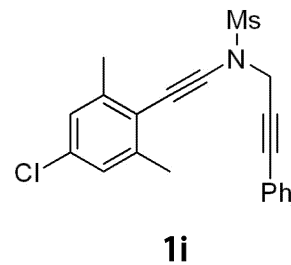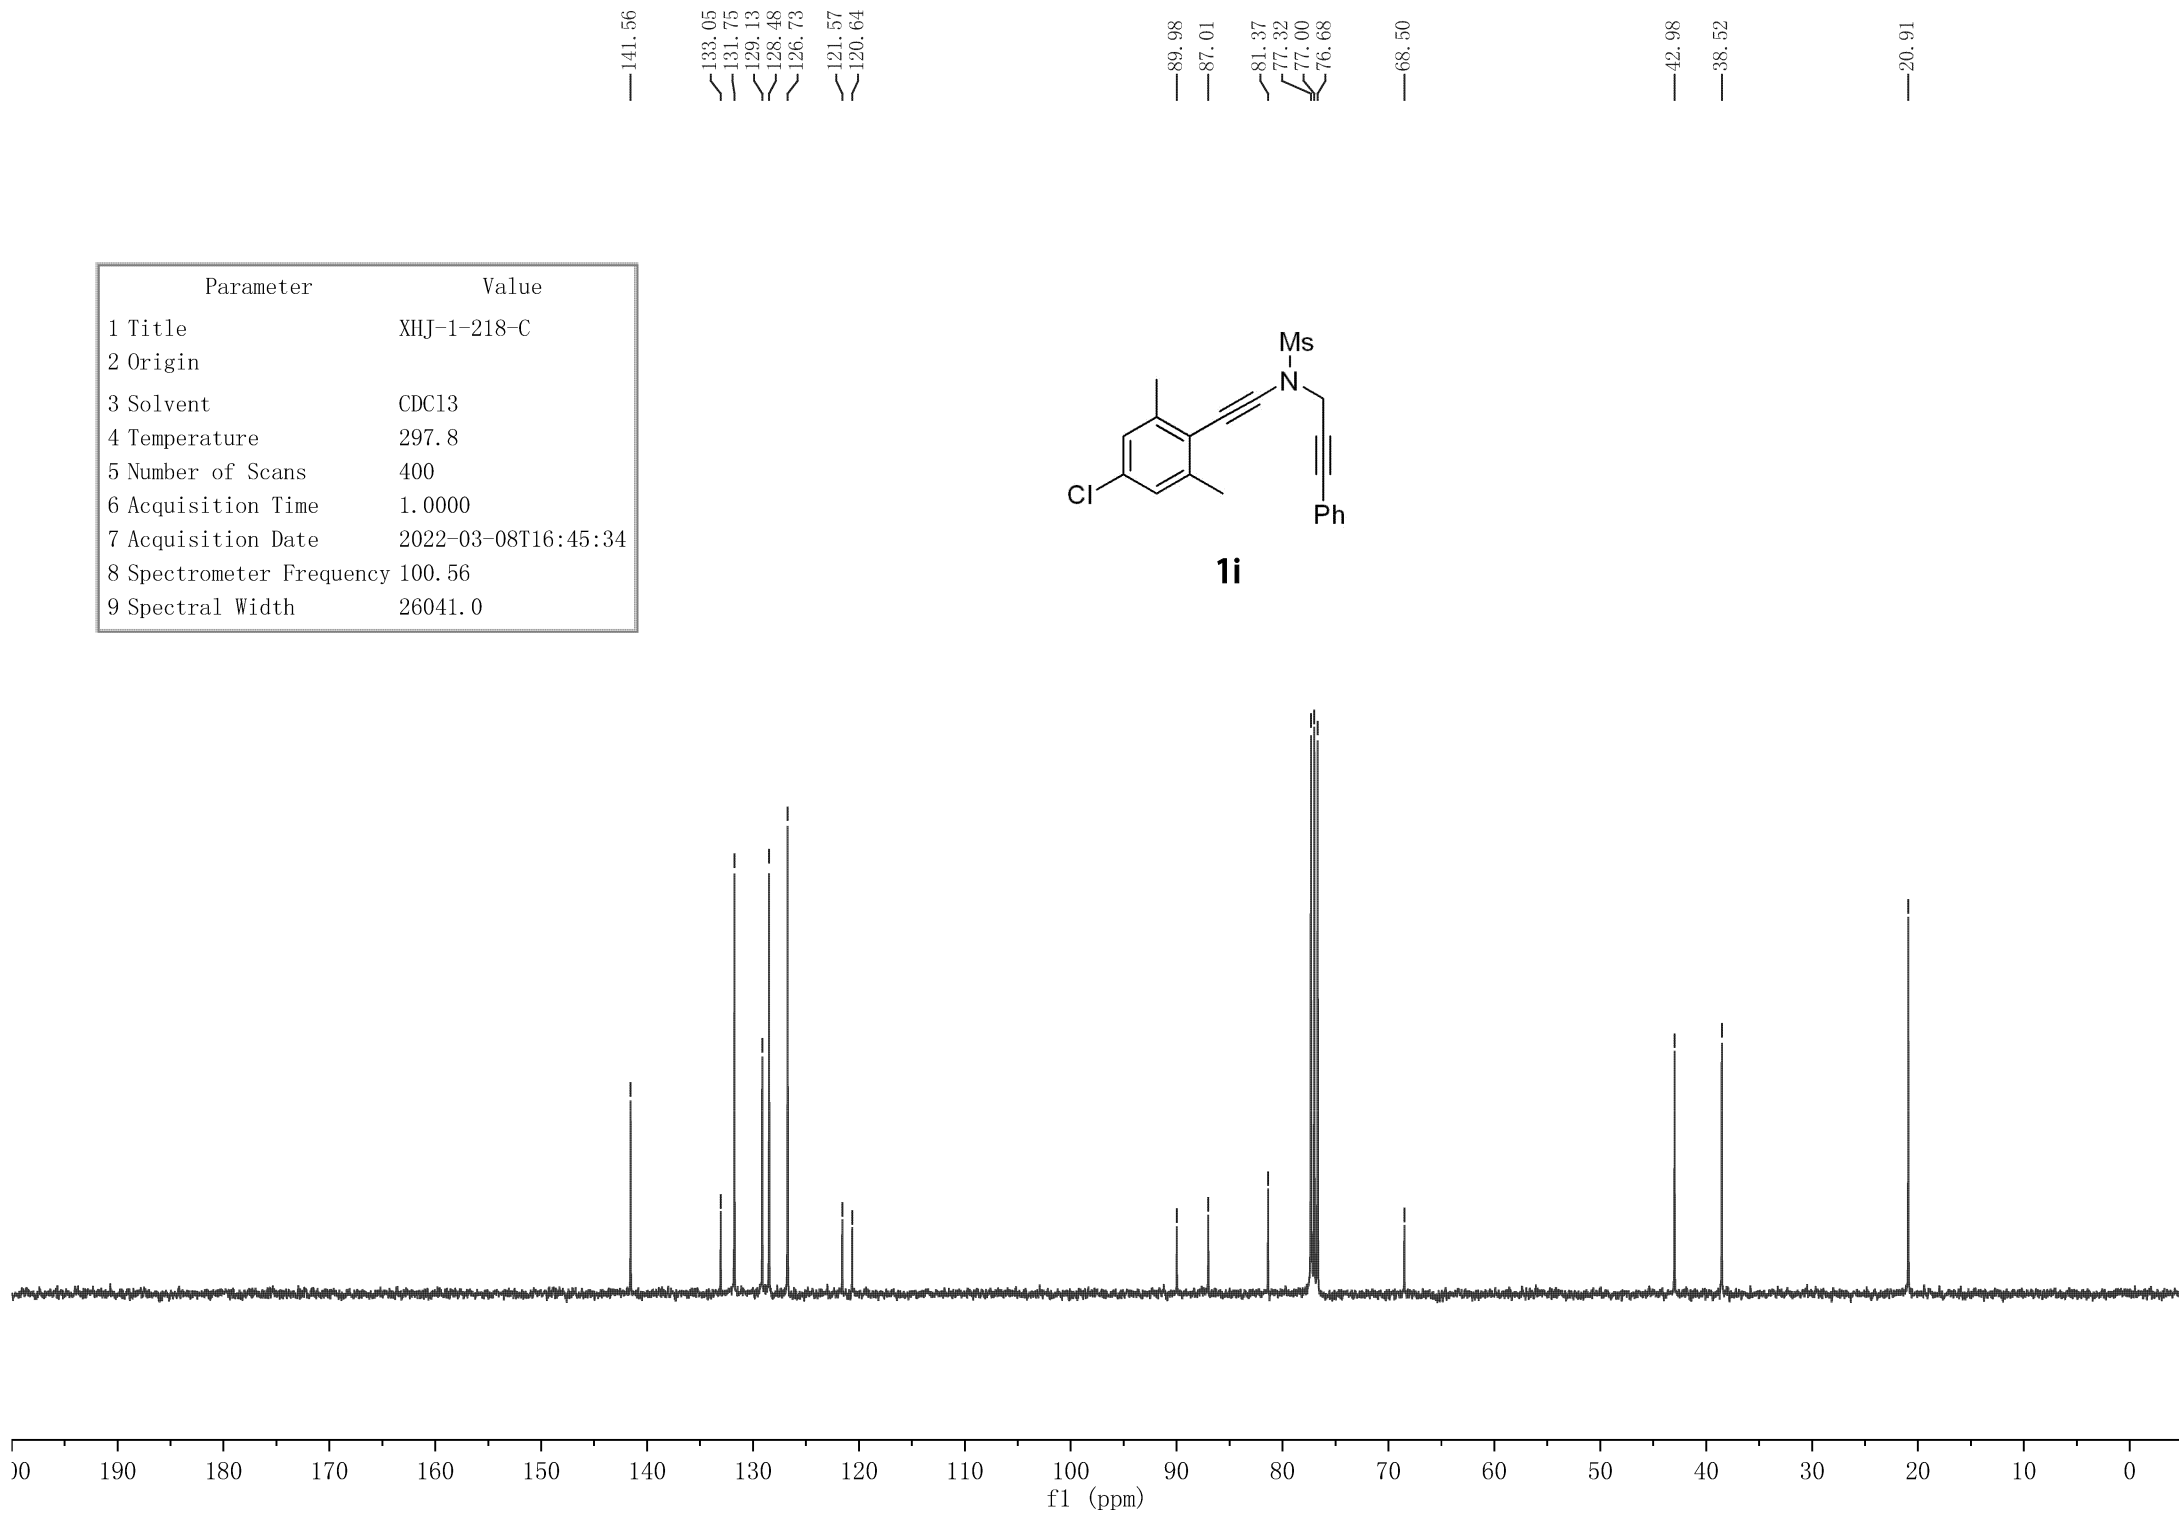



7.434  
7.418  
7.415  
7.387  
7.369  
7.351  
7.345  
7.326  
7.310  
7.185

| Parameter                | Value               |
|--------------------------|---------------------|
| 1 Title                  | XHJ-1-202-II        |
| 2 Origin                 |                     |
| 3 Solvent                | CDC13               |
| 4 Temperature            | 295.8               |
| 5 Number of Scans        | 16                  |
| 6 Acquisition Time       | 4.0002              |
| 7 Acquisition Date       | 2022-03-03T17:39:45 |
| 8 Spectrometer Frequency | 399.93              |
| 9 Spectral Width         | 8012.0              |

4.630  
3.265  
2.396

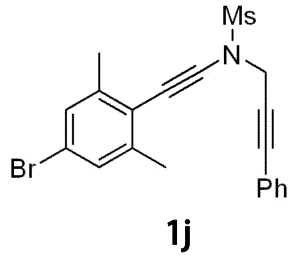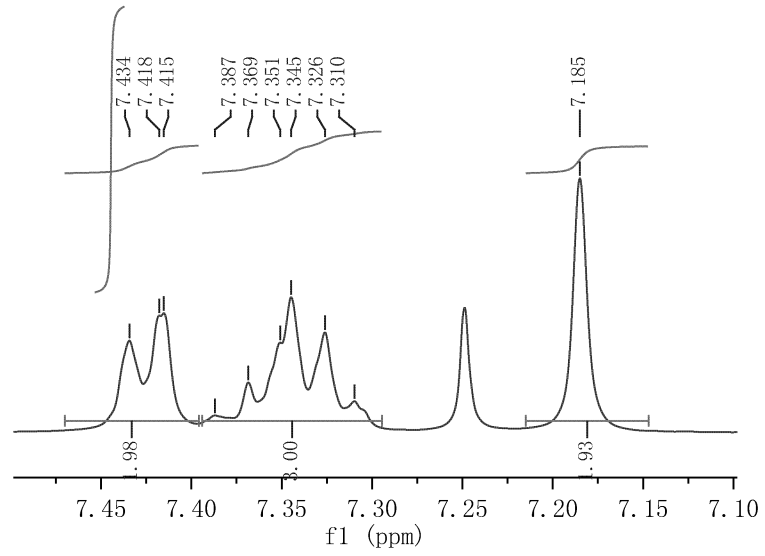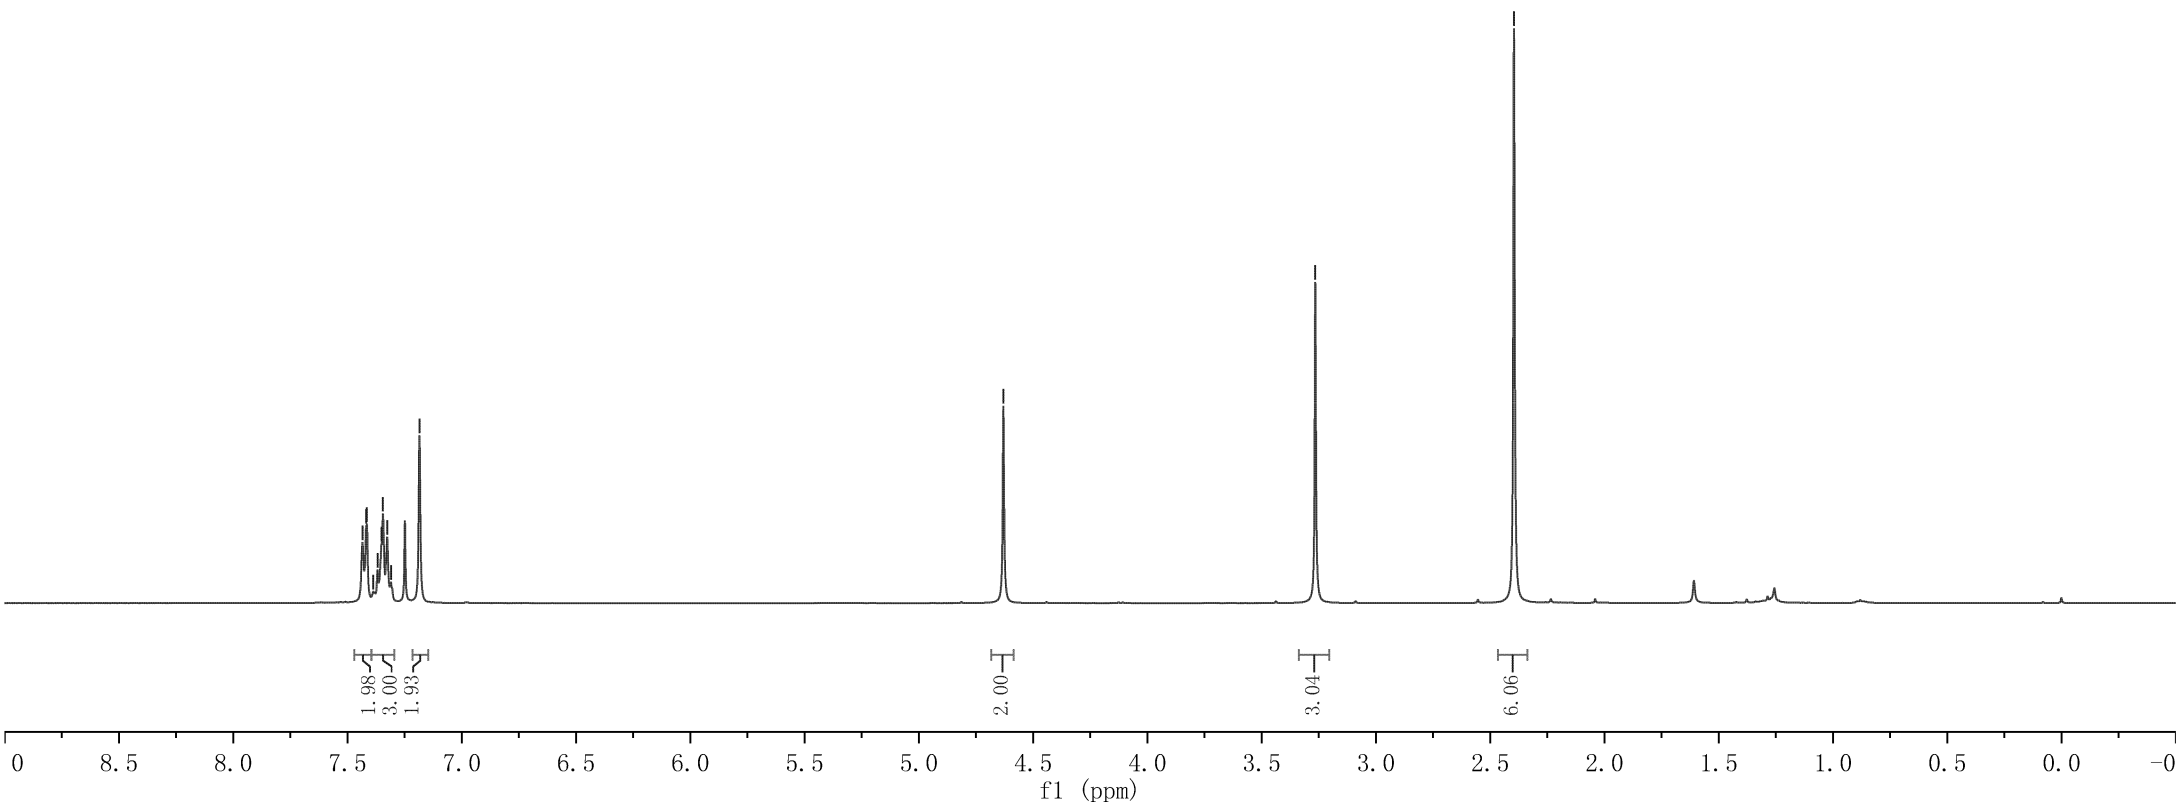

| Parameter                | Value               |
|--------------------------|---------------------|
| 1 Title                  | XHJ-1-202-C         |
| 2 Origin                 |                     |
| 3 Solvent                | CDC13               |
| 4 Temperature            | 296.3               |
| 5 Number of Scans        | 400                 |
| 6 Acquisition Time       | 1.0000              |
| 7 Acquisition Date       | 2022-03-03T17:55:12 |
| 8 Spectrometer Frequency | 100.56              |
| 9 Spectral Width         | 26041.0             |

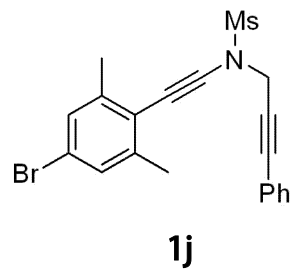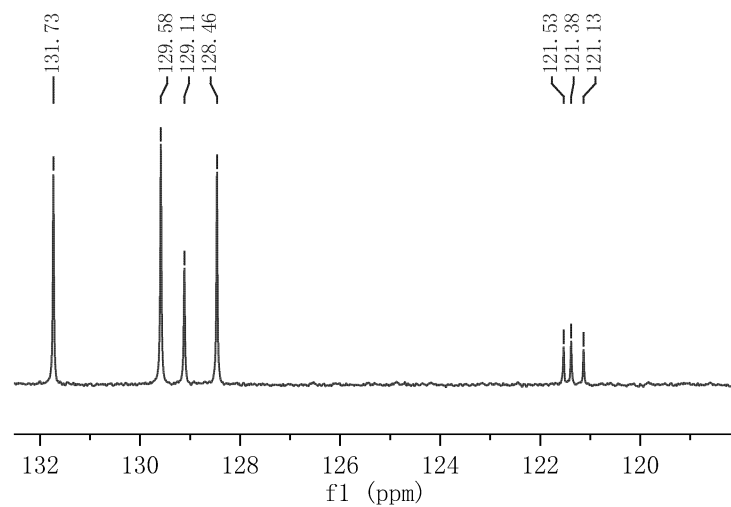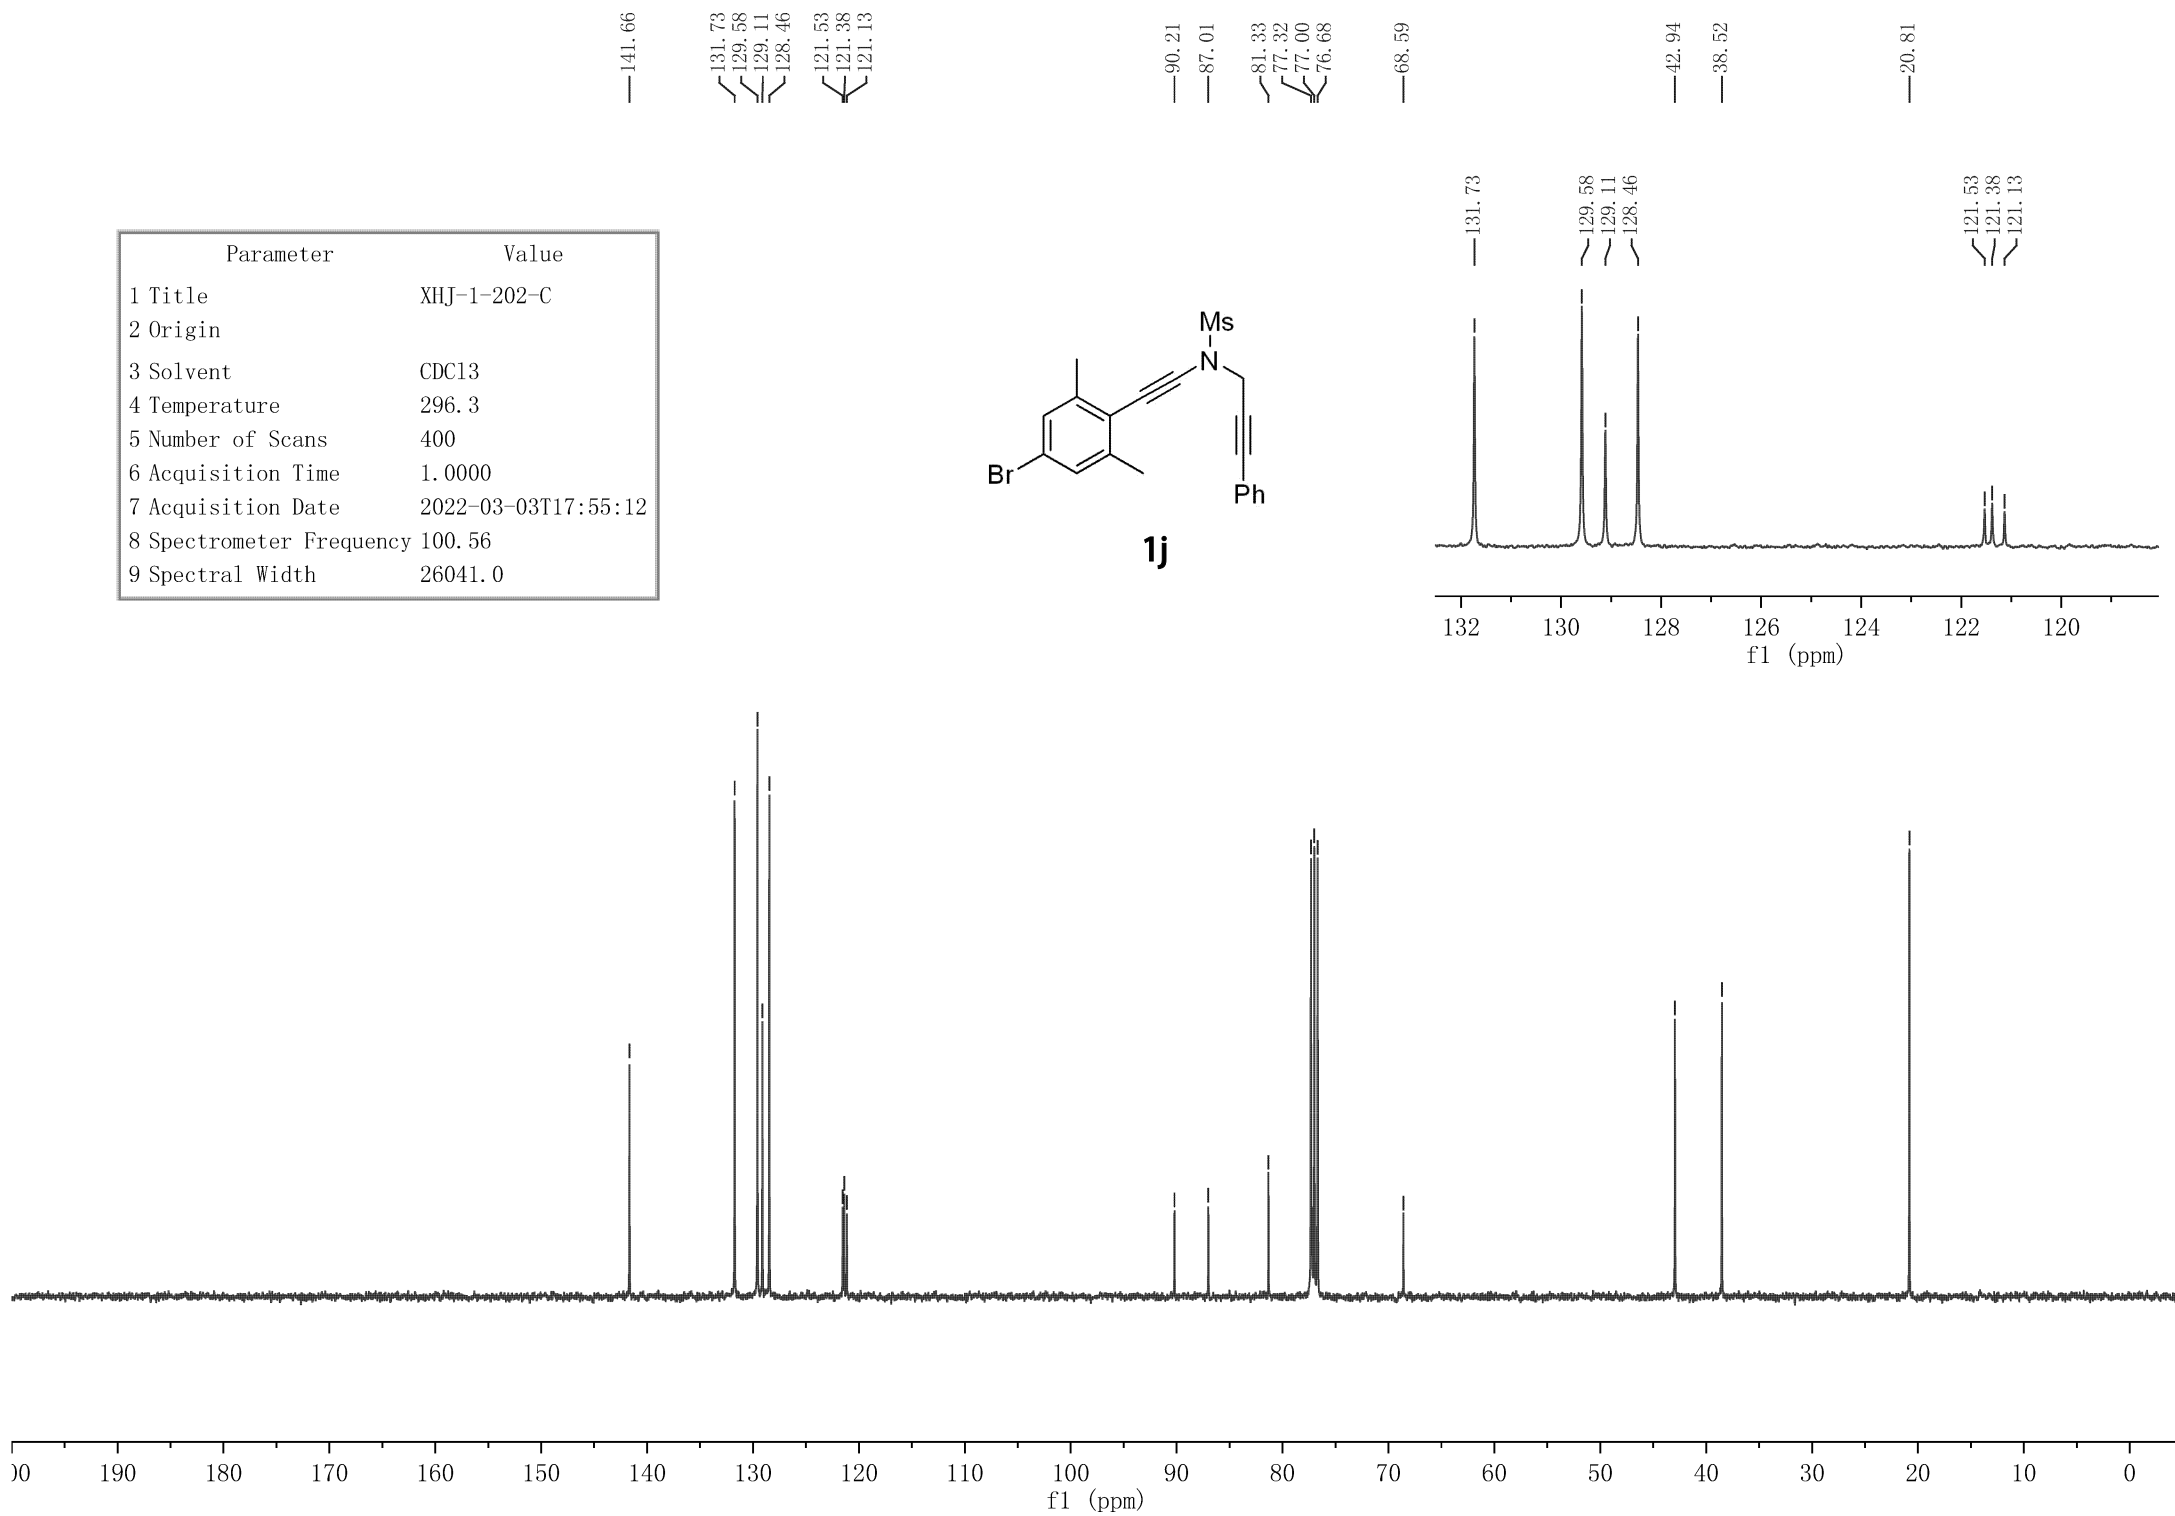

7.461  
7.454  
7.449  
7.396  
7.393  
7.374  
7.353  
7.335  
7.316  
7.301  
7.244  
7.229  
7.224  
7.211  
7.195  
7.177

4.624

3.308

| Parameter                | Value               |
|--------------------------|---------------------|
| 1 Title                  | XHJ-2-76-H          |
| 2 Origin                 | Bruker BioSpin GmbH |
| 3 Solvent                | CDC13               |
| 4 Temperature            | 298.0               |
| 5 Number of Scans        | 5                   |
| 6 Acquisition Time       | 4.0894              |
| 7 Acquisition Date       | 2022-05-19T15:34:58 |
| 8 Spectrometer Frequency | 400.13              |
| 9 Spectral Width         | 8012.8              |

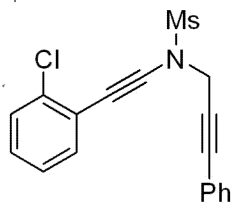

**1k**

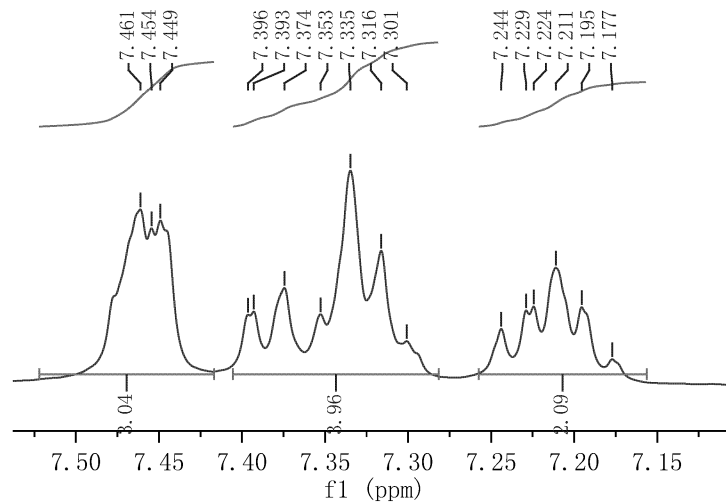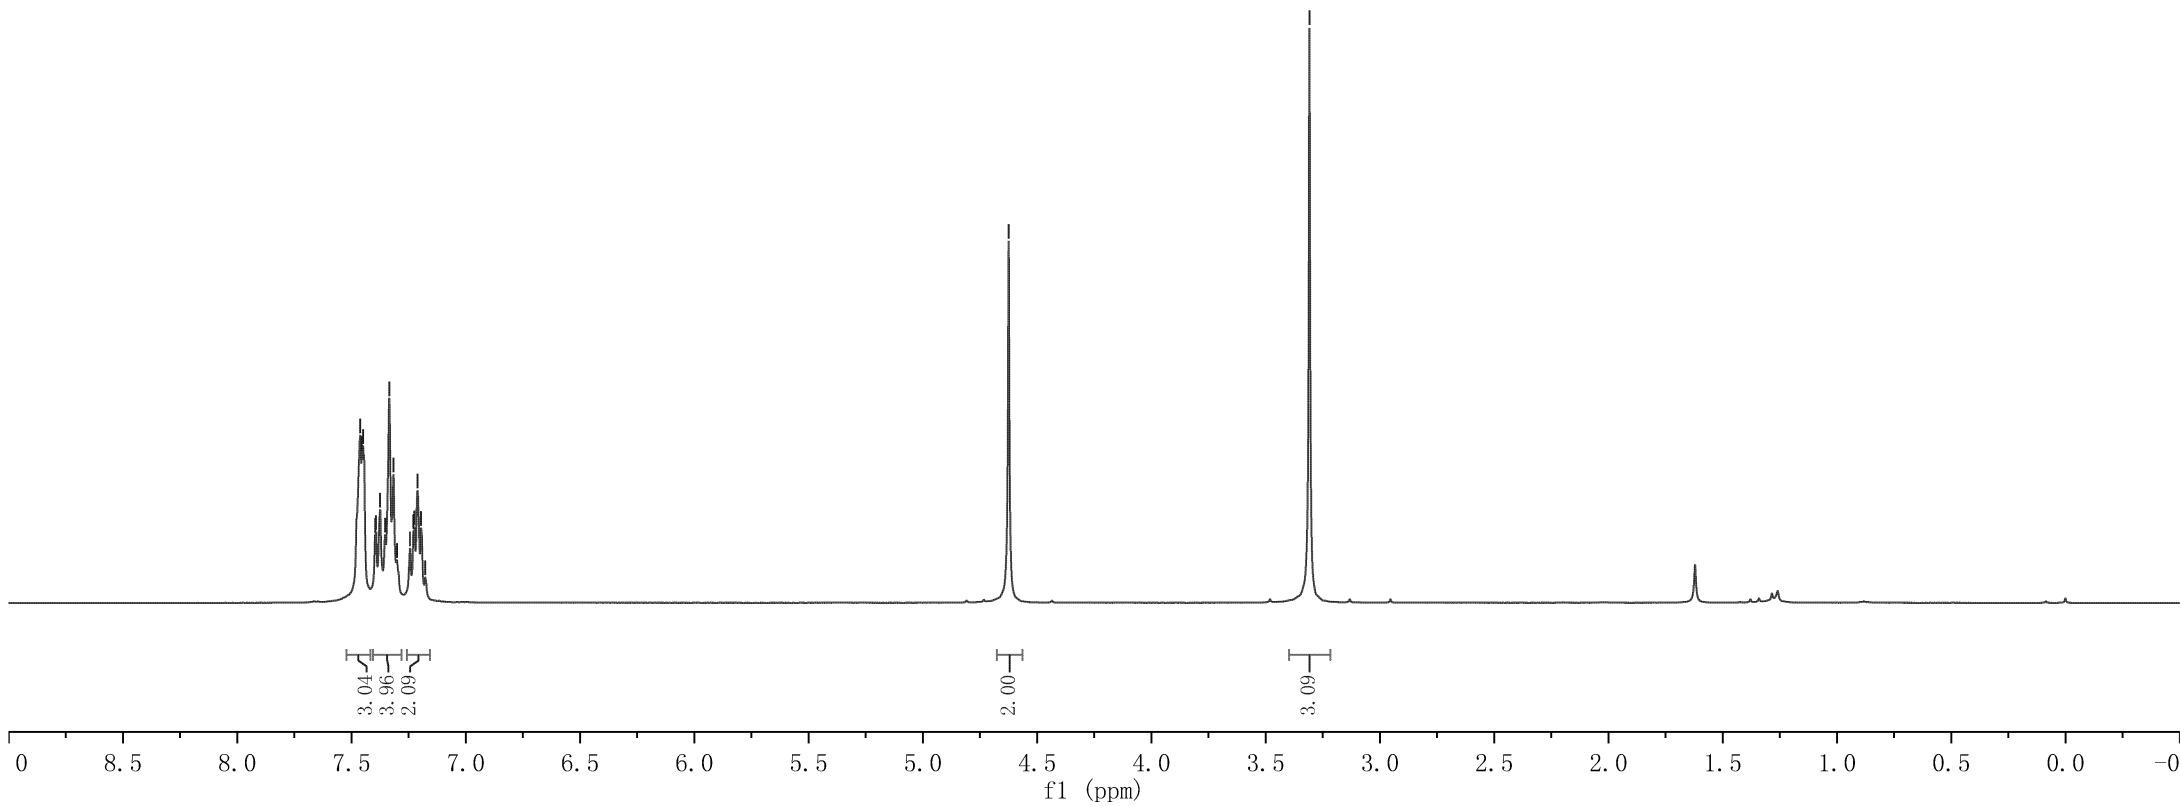

| Parameter                | Value               |
|--------------------------|---------------------|
| 1 Title                  | XHJ-2-76-C          |
| 2 Origin                 | Bruker BioSpin GmbH |
| 3 Solvent                | CDC13               |
| 4 Temperature            | 300.0               |
| 5 Number of Scans        | 19                  |
| 6 Acquisition Time       | 1.3631              |
| 7 Acquisition Date       | 2022-05-19T15:36:06 |
| 8 Spectrometer Frequency | 100.61              |
| 9 Spectral Width         | 24038.5             |

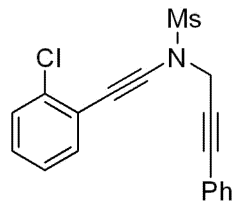

**1k**

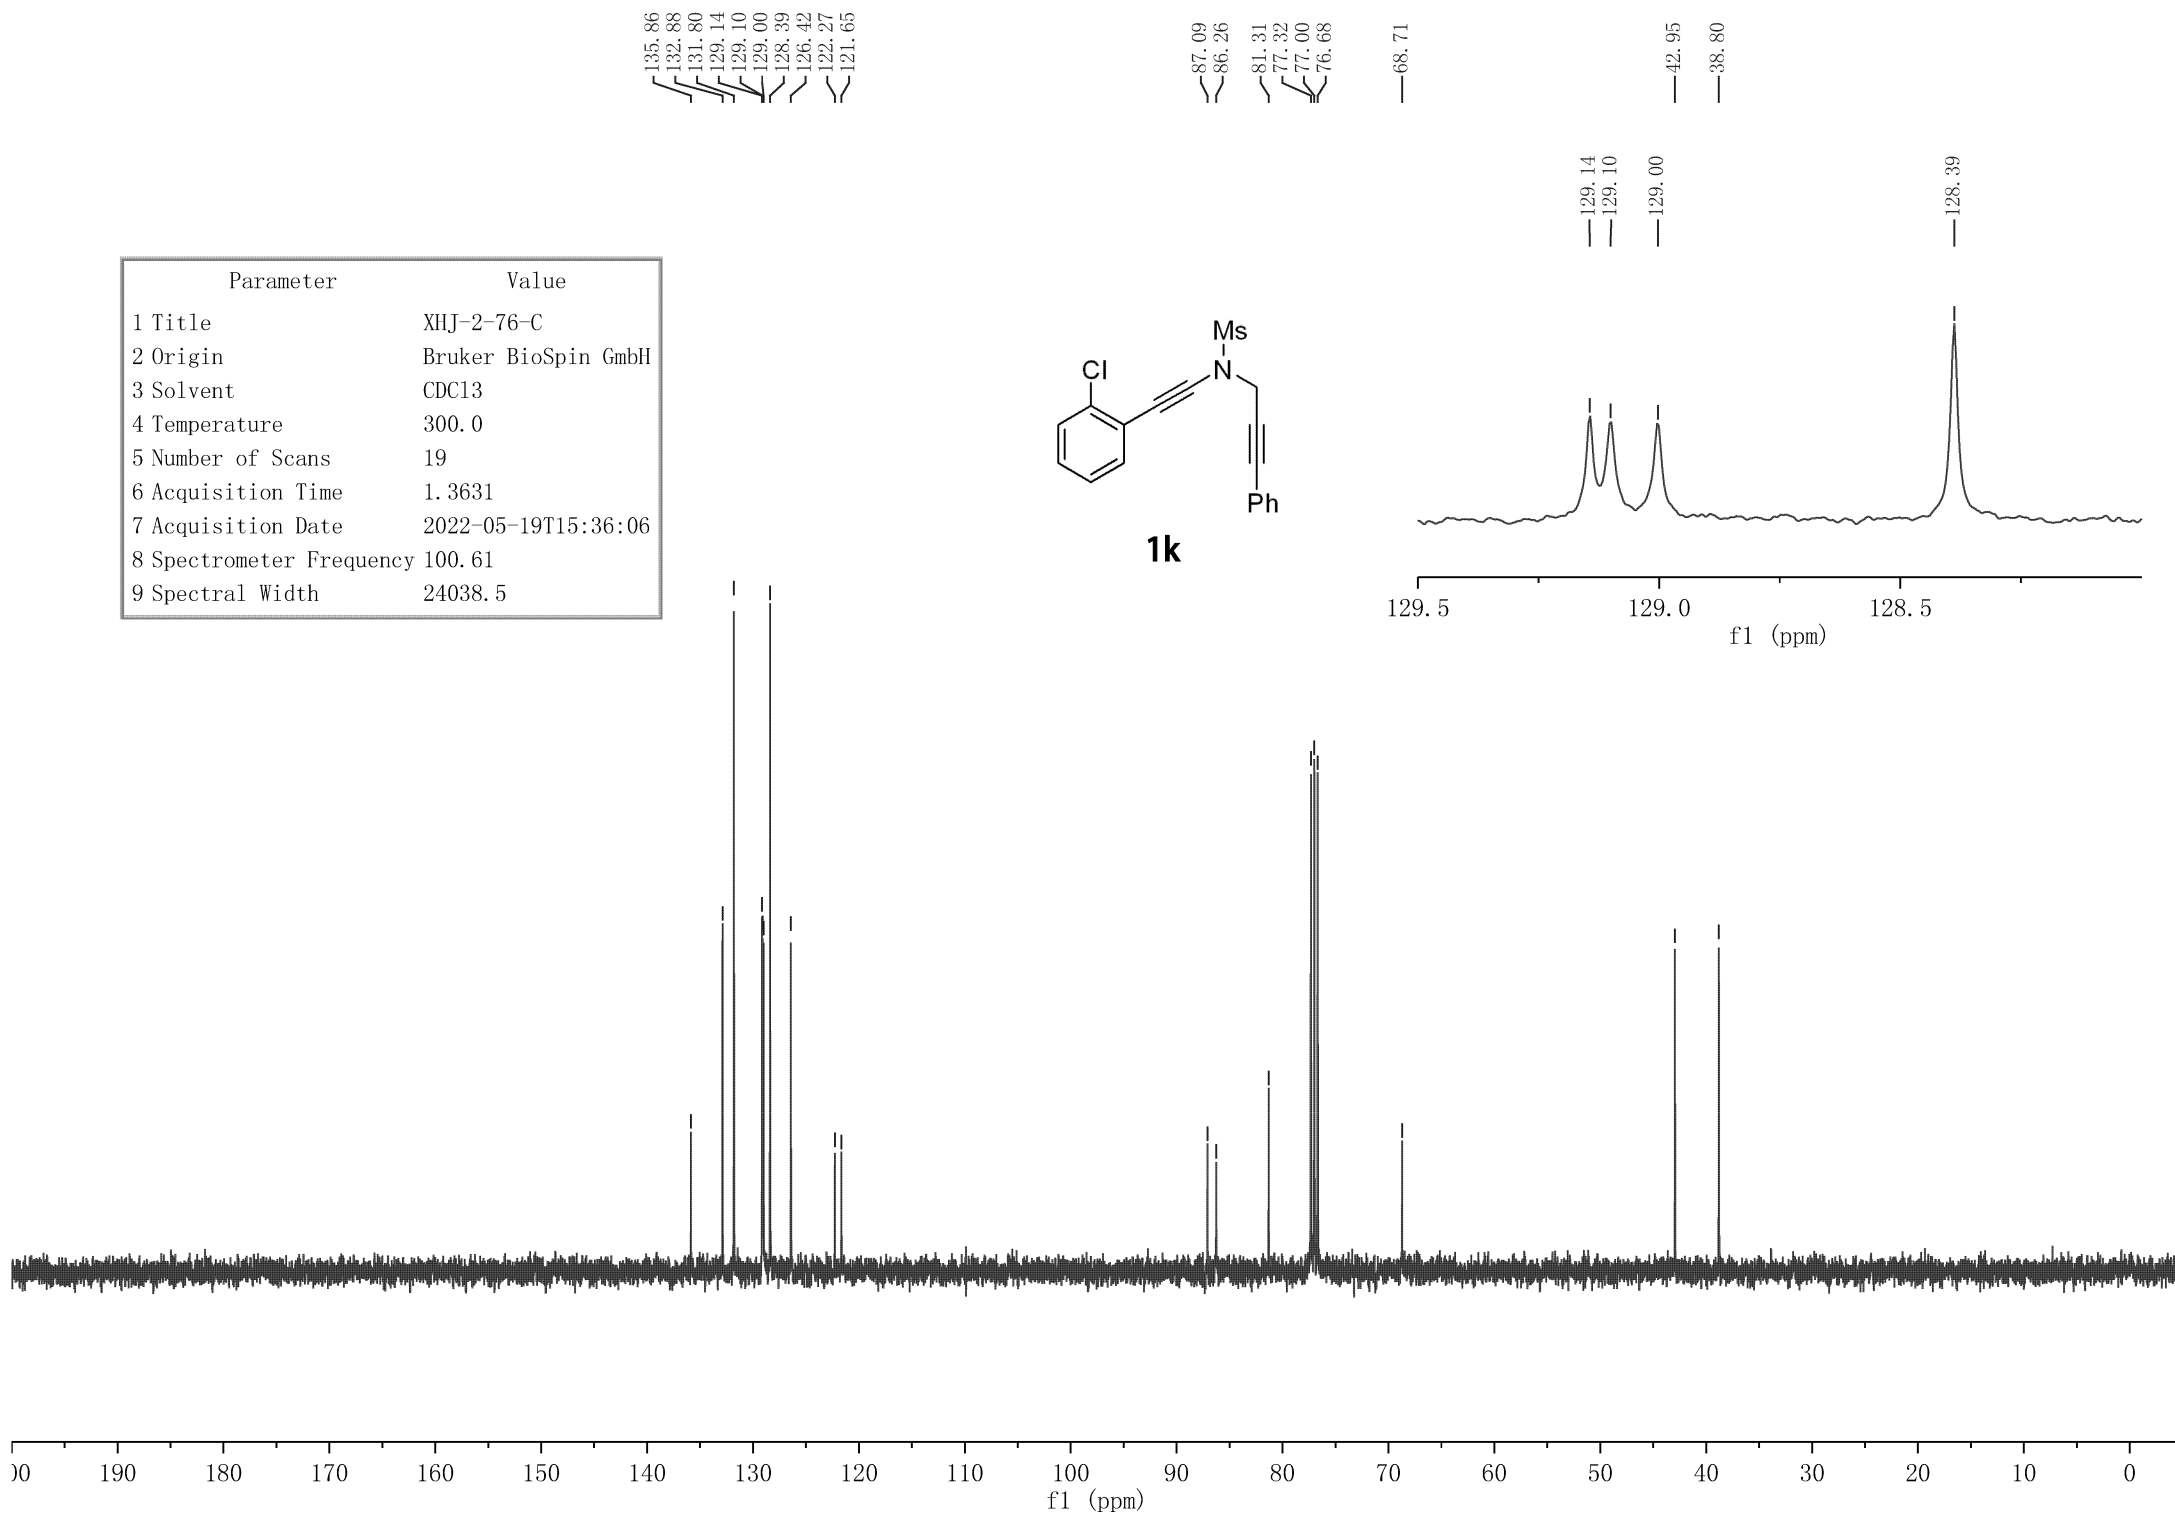

| Parameter                | Value               |
|--------------------------|---------------------|
| 1 Title                  | XHJ-1-167-H         |
| 2 Origin                 |                     |
| 3 Solvent                | CDC13               |
| 4 Temperature            | 297.6               |
| 5 Number of Scans        | 16                  |
| 6 Acquisition Time       | 4.0002              |
| 7 Acquisition Date       | 2022-02-15T10:37:14 |
| 8 Spectrometer Frequency | 399.93              |
| 9 Spectral Width         | 8012.0              |

7.449  
7.433  
7.430  
7.380  
7.365  
7.350  
7.332  
7.318

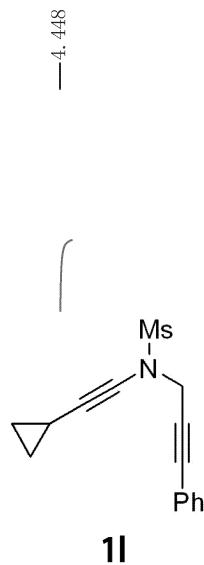

1.394  
1.381  
1.374  
1.361  
1.350  
1.341  
1.329  
0.843  
0.837  
0.824  
0.818  
0.736  
0.726  
0.720

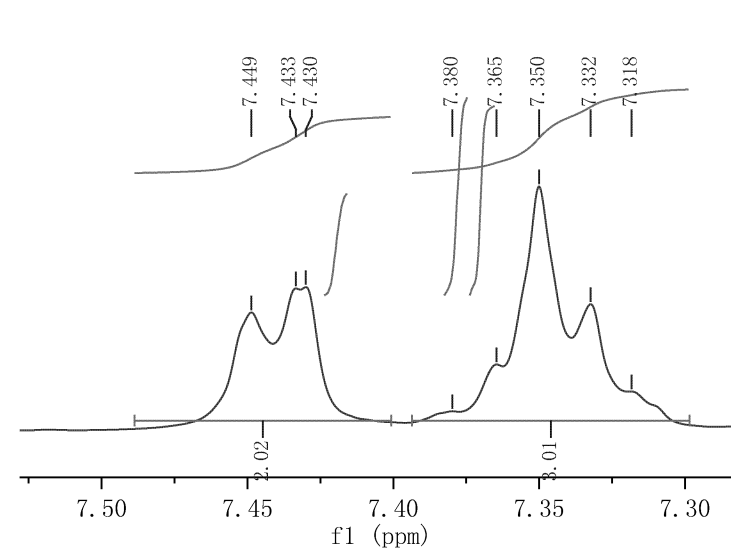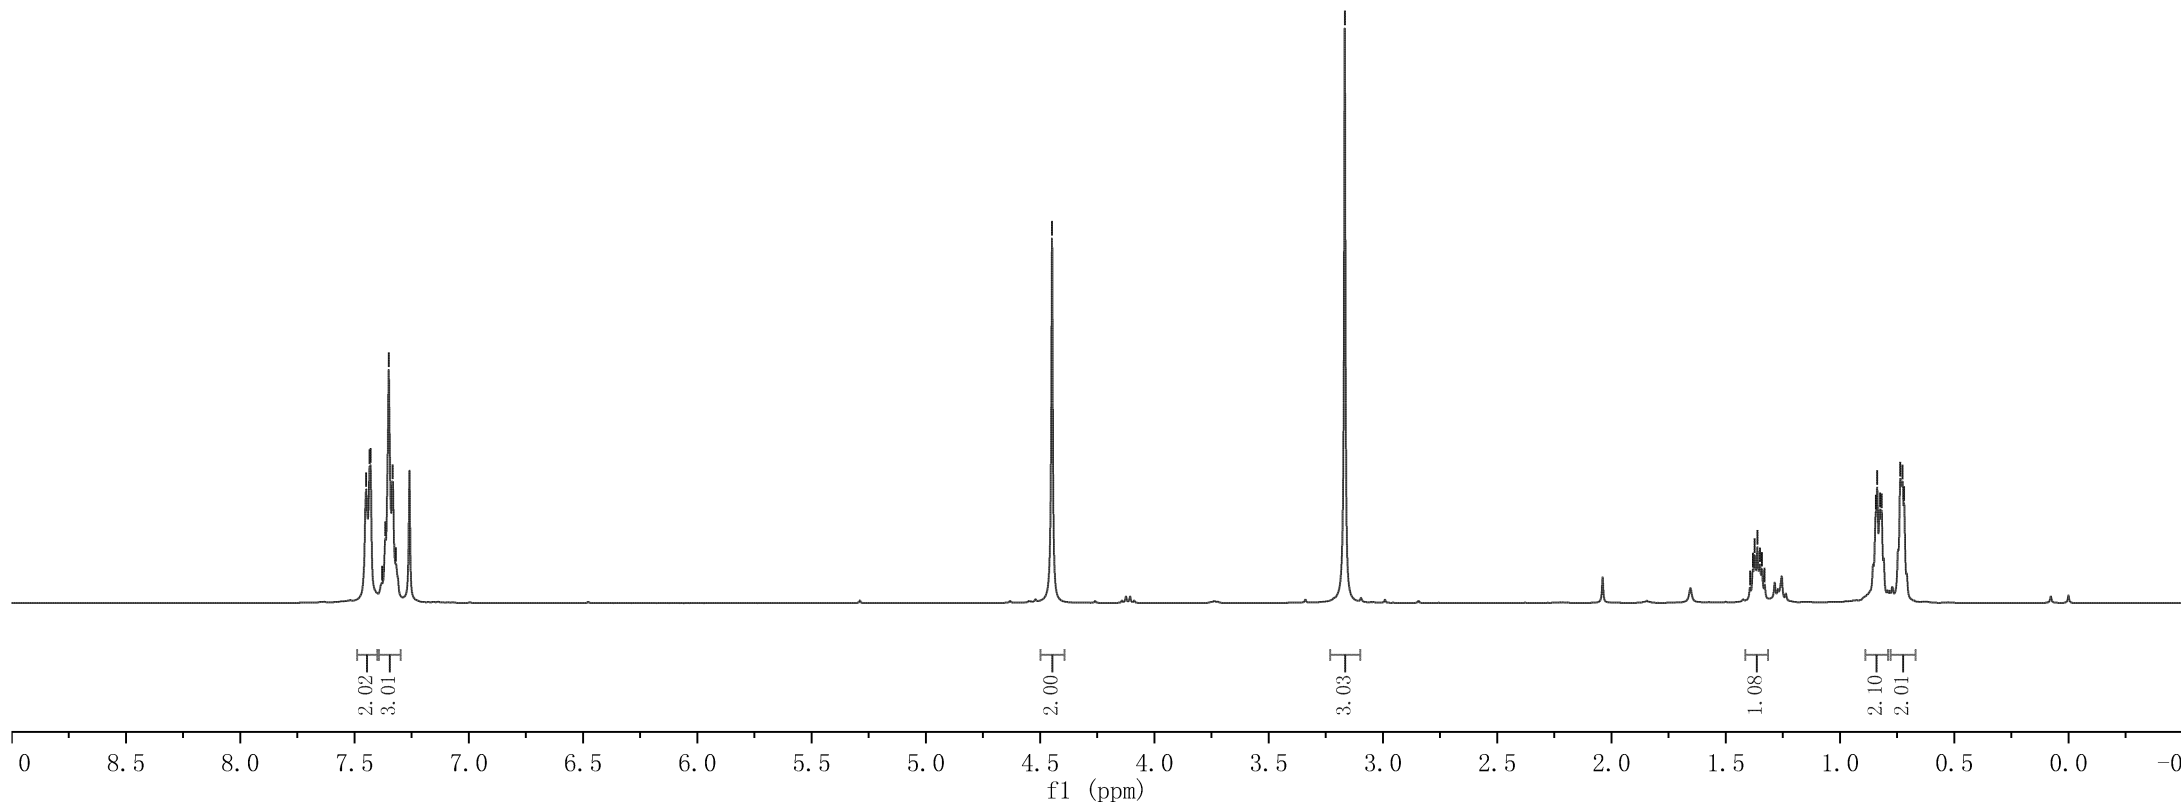

| Parameter                | Value               |
|--------------------------|---------------------|
| 1 Title                  | XHJ-1-167-C         |
| 2 Origin                 |                     |
| 3 Solvent                | CDC13               |
| 4 Temperature            | 297.6               |
| 5 Number of Scans        | 200                 |
| 6 Acquisition Time       | 1.0000              |
| 7 Acquisition Date       | 2022-02-15T10:46:09 |
| 8 Spectrometer Frequency | 100.56              |
| 9 Spectral Width         | 26041.0             |

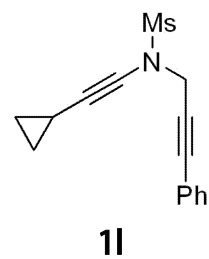

131.70  
128.90  
128.38  
121.78

86.53  
81.72  
77.32  
77.00  
76.68  
75.52  
67.78

42.80  
38.03

8.94

-0.85

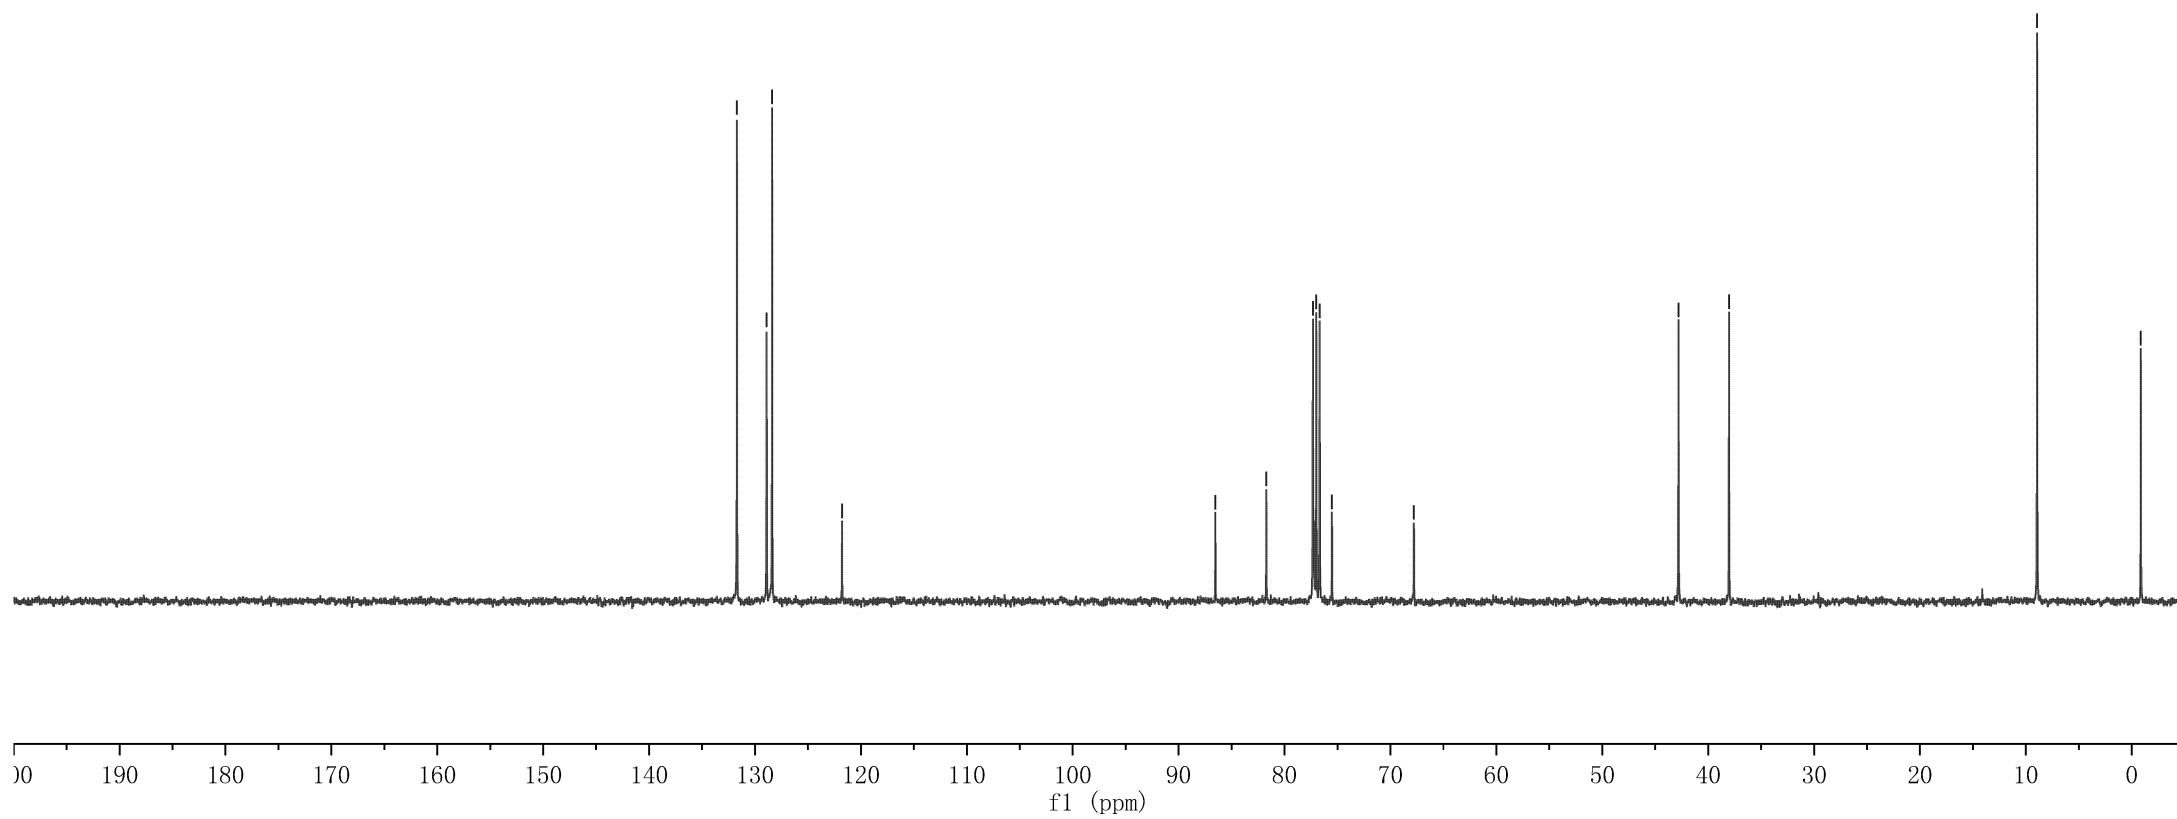

| Parameter                | Value               |
|--------------------------|---------------------|
| 1 Title                  | XHJ-2-22-2-H        |
| 2 Origin                 |                     |
| 3 Solvent                | CDCl <sub>3</sub>   |
| 4 Temperature            | 297.0               |
| 5 Number of Scans        | 16                  |
| 6 Acquisition Time       | 4.0002              |
| 7 Acquisition Date       | 2022-04-15T14:07:33 |
| 8 Spectrometer Frequency | 399.93              |
| 9 Spectral Width         | 8012.0              |

7.431  
7.418  
7.410  
7.396  
7.113  
7.097  
7.092  
7.076  
7.035  
7.013  
6.991

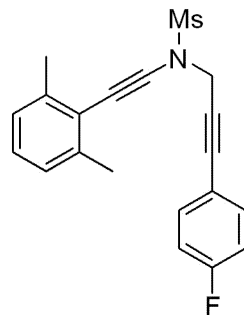

**1m**

3.256

2.431

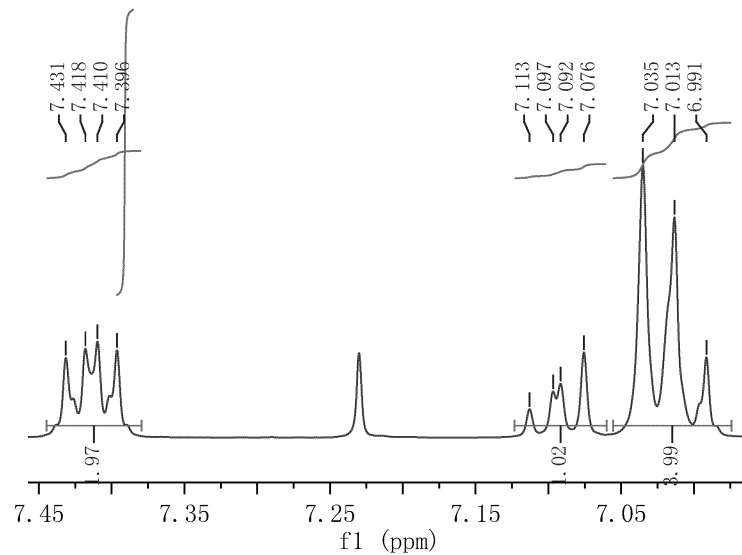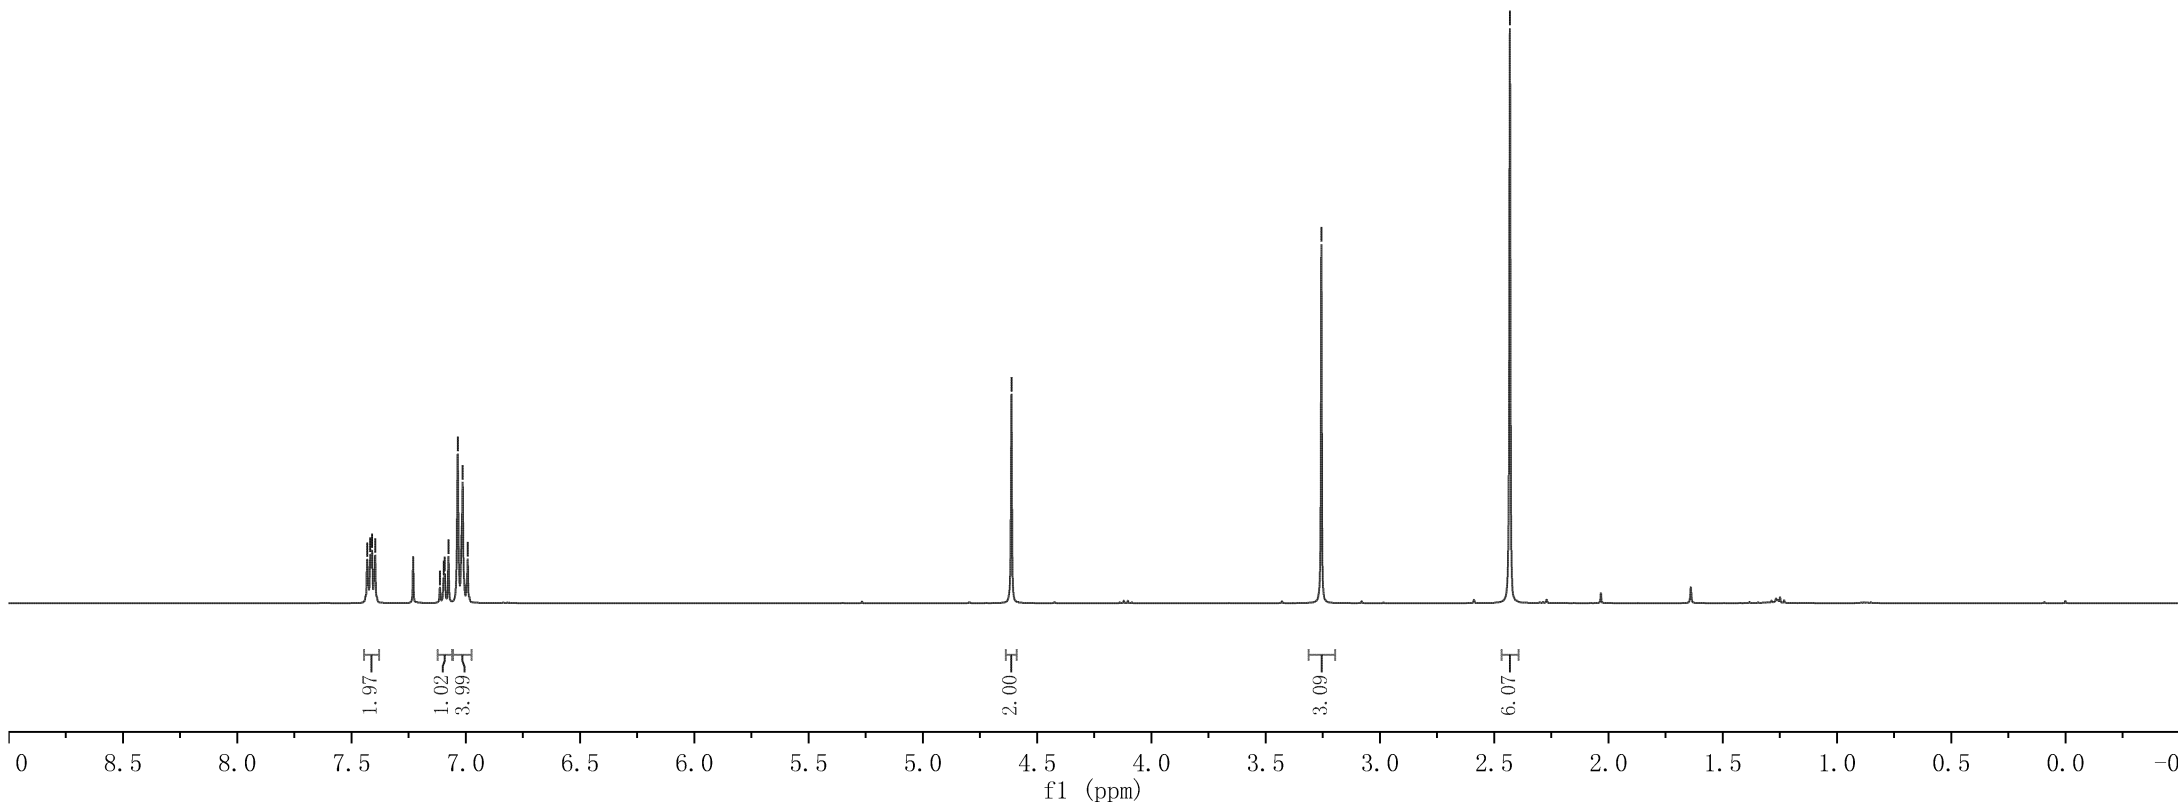

| Parameter                | Value               |
|--------------------------|---------------------|
| 1 Title                  | XHJ-2-22-2-C        |
| 2 Origin                 |                     |
| 3 Solvent                | CDC13               |
| 4 Temperature            | 296.3               |
| 5 Number of Scans        | 200                 |
| 6 Acquisition Time       | 1.0000              |
| 7 Acquisition Date       | 2022-04-15T14:04:04 |
| 8 Spectrometer Frequency | 100.56              |
| 9 Spectral Width         | 26041.0             |

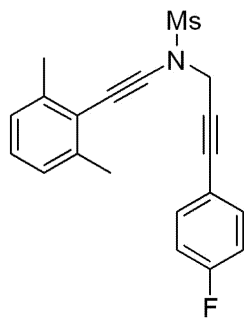

**1m**

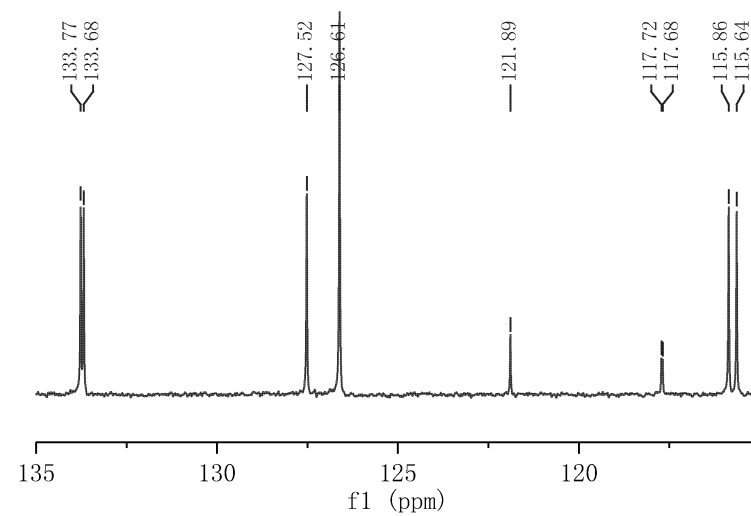

164.06  
161.56

139.78  
133.77  
133.68  
127.52  
126.61  
121.89  
117.72  
117.68  
115.86  
115.64

89.27  
85.77  
81.28  
77.32  
77.00  
76.68  
69.28

42.86  
38.30  
20.99

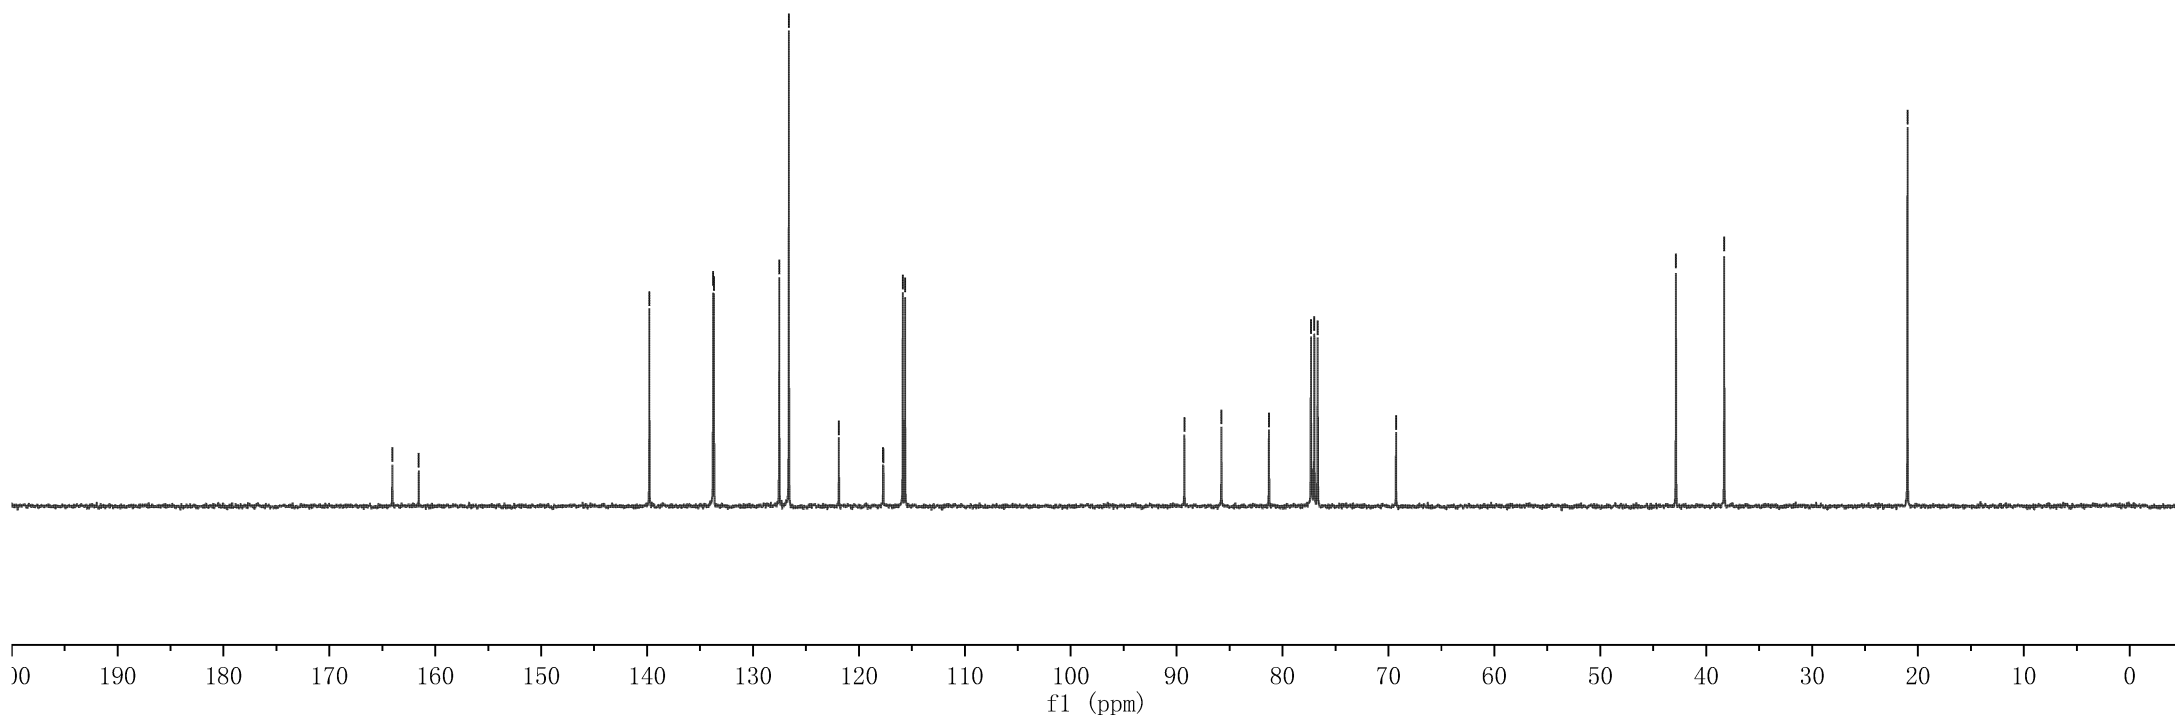



| Parameter                | Value               |
|--------------------------|---------------------|
| 1 Title                  | XHJ-2-22-F-2        |
| 2 Origin                 | Bruker BioSpin GmbH |
| 3 Solvent                | CDC13               |
| 4 Temperature            | 297.1               |
| 5 Number of Scans        | 16                  |
| 6 Acquisition Time       | 0.7340              |
| 7 Acquisition Date       | 2022-08-16T20:18:57 |
| 8 Spectrometer Frequency | 376.31              |
| 9 Spectral Width         | 89285.7             |

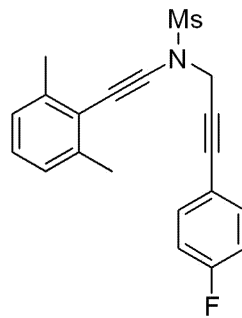

1m

-109.37

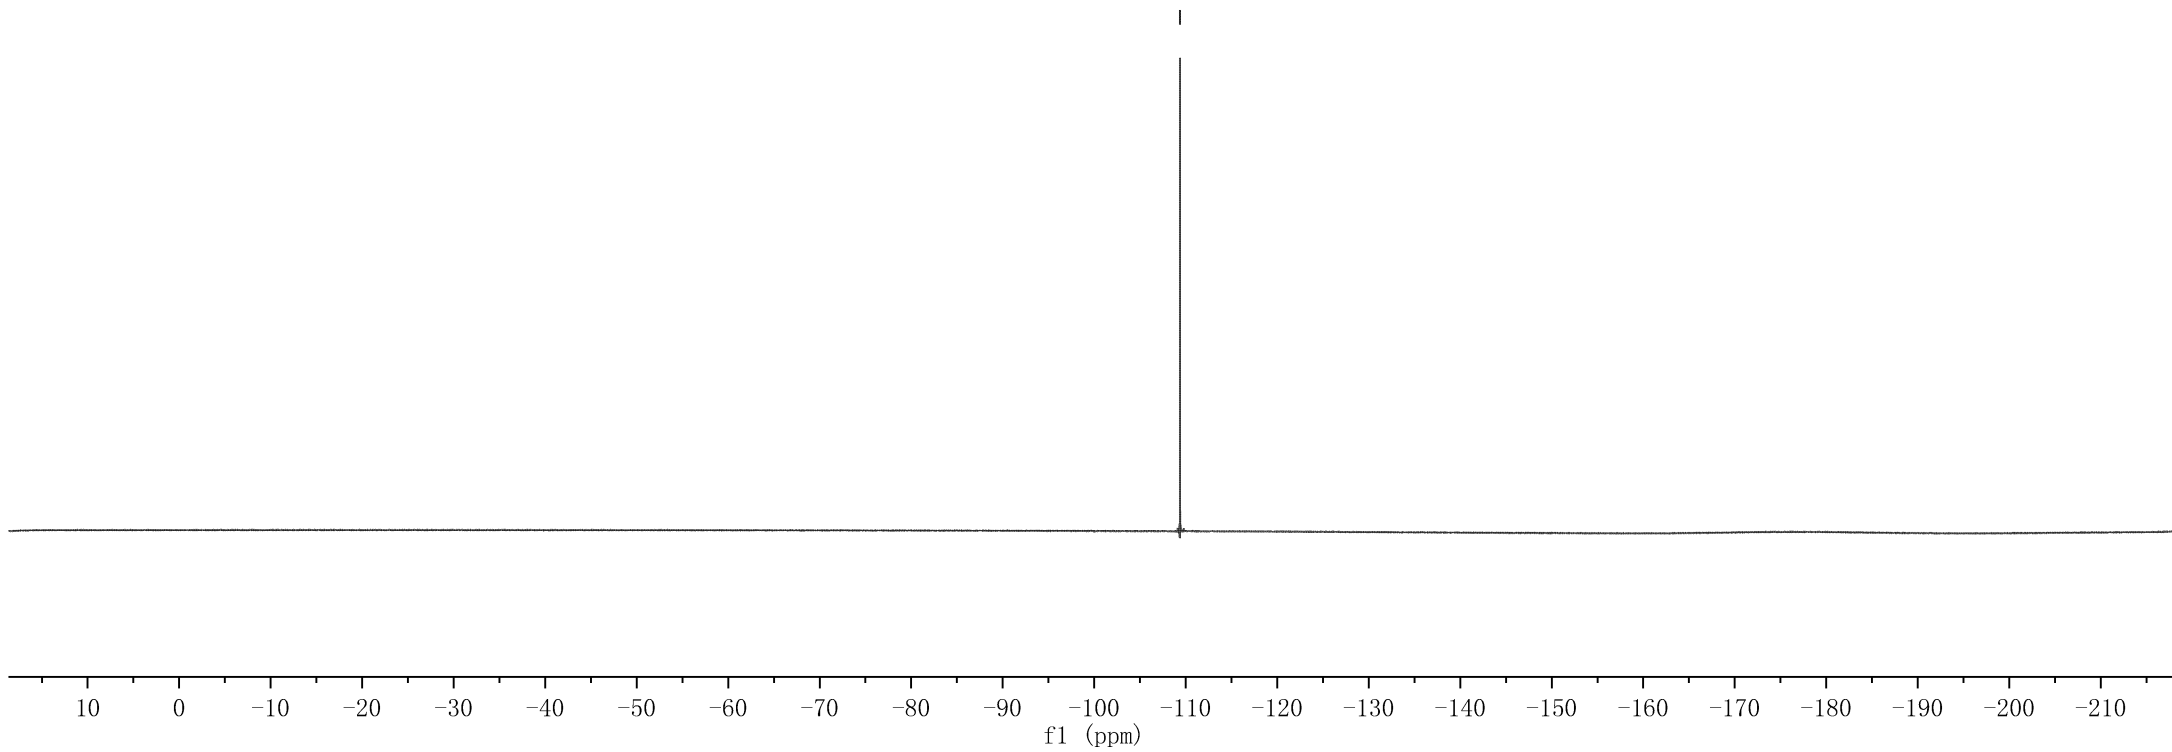

7.365  
7.344  
7.301  
7.280  
7.112  
7.096  
7.091  
7.075  
7.034  
7.015

4.615

3.250

2.426

| Parameter                | Value               |
|--------------------------|---------------------|
| 1 Title                  | XHJ-2-29-H          |
| 2 Origin                 | Bruker BioSpin GmbH |
| 3 Solvent                | CDCl3               |
| 4 Temperature            | 298.0               |
| 5 Number of Scans        | 6                   |
| 6 Acquisition Time       | 4.0894              |
| 7 Acquisition Date       | 2022-04-19T21:10:15 |
| 8 Spectrometer Frequency | 400.13              |
| 9 Spectral Width         | 8012.8              |

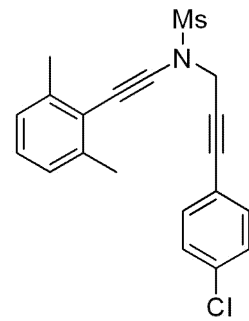

**1n**

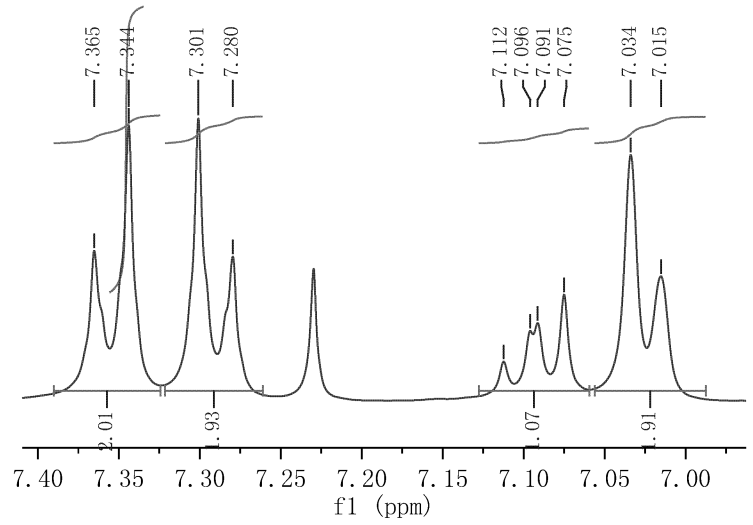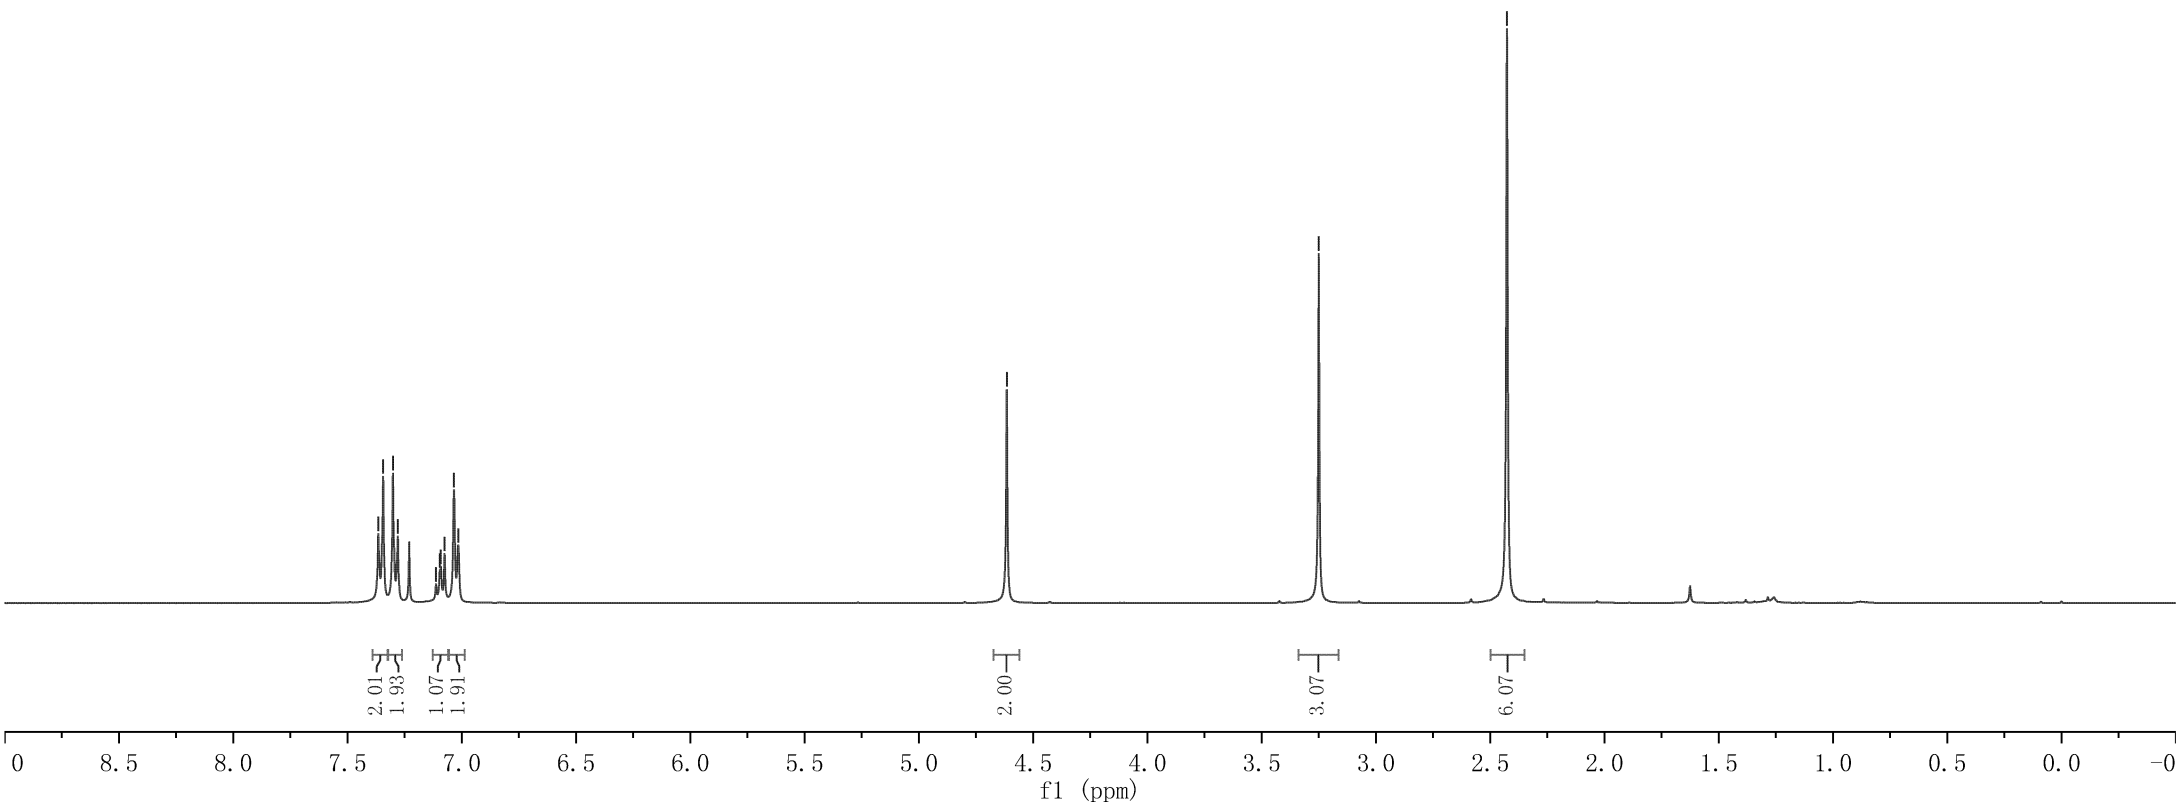

| Parameter                | Value               |
|--------------------------|---------------------|
| 1 Title                  | XHJ-2-29-C          |
| 2 Origin                 | Bruker BioSpin GmbH |
| 3 Solvent                | CDC13               |
| 4 Temperature            | 300.0               |
| 5 Number of Scans        | 30                  |
| 6 Acquisition Time       | 1.3631              |
| 7 Acquisition Date       | 2022-04-19T21:11:38 |
| 8 Spectrometer Frequency | 100.61              |
| 9 Spectral Width         | 24038.5             |

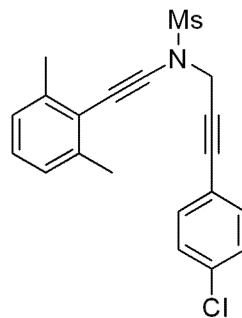

**1n**

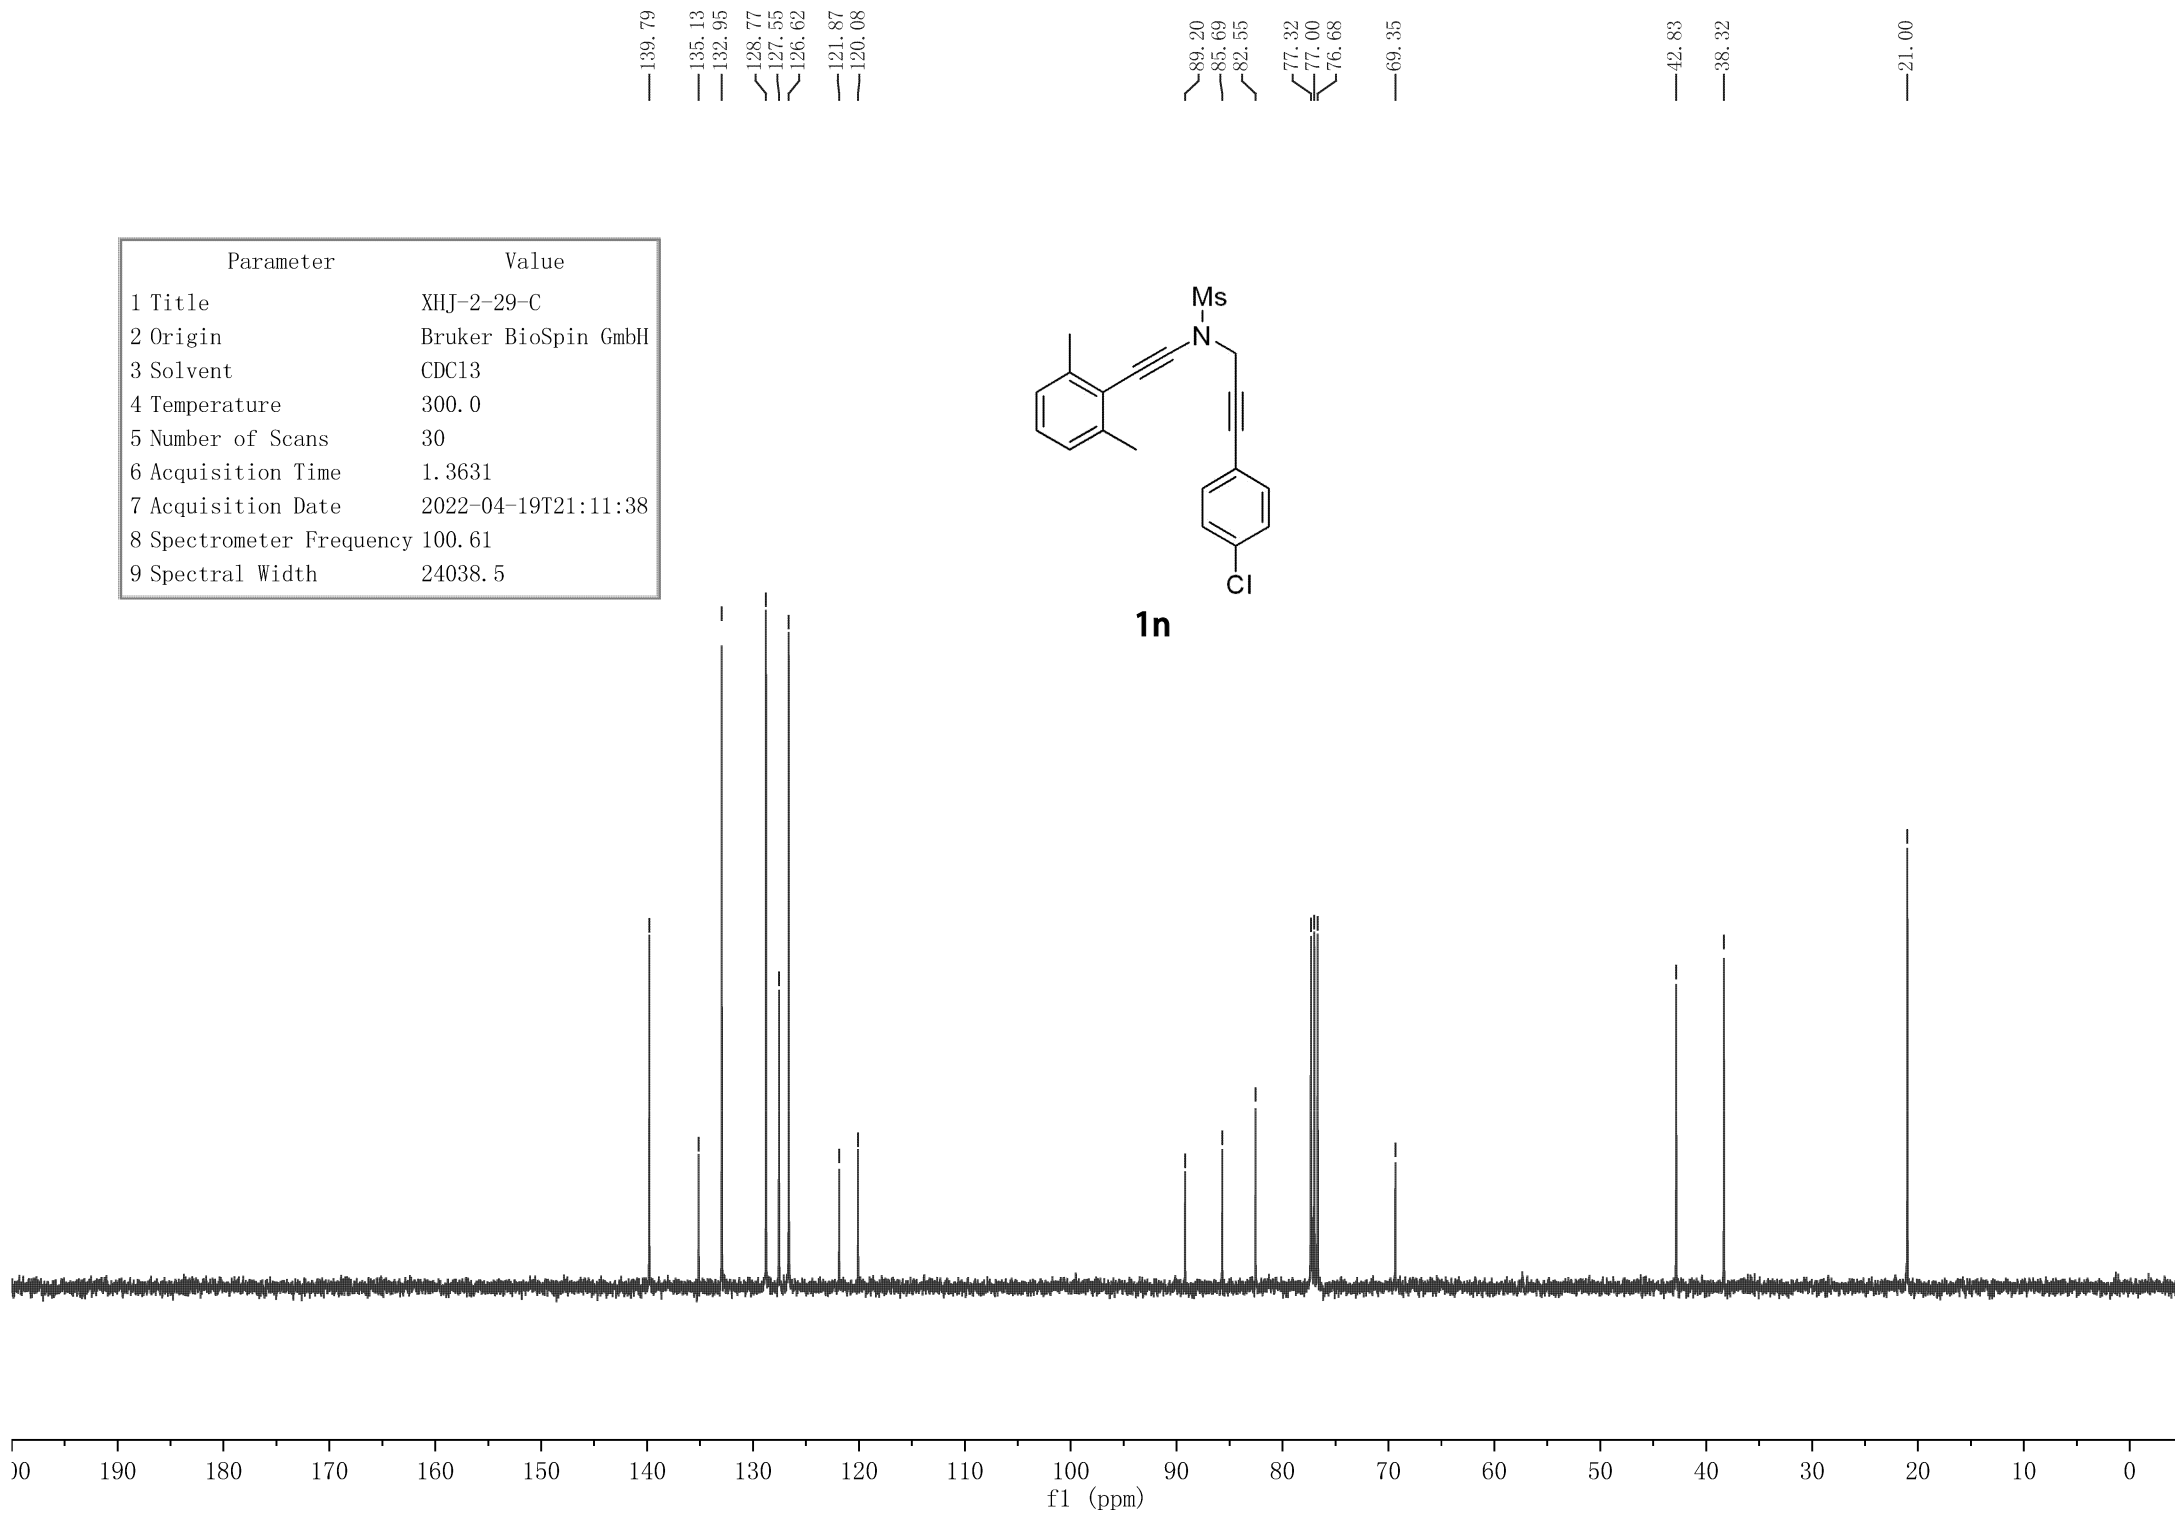

7.470  
7.449  
7.298  
7.277  
7.118  
7.102  
7.097  
7.081  
7.040  
7.021

4.615

3.253

2.426

| Parameter                | Value               |
|--------------------------|---------------------|
| 1 Title                  | XHJ-2-13-H          |
| 2 Origin                 | Bruker BioSpin GmbH |
| 3 Solvent                | CDCl3               |
| 4 Temperature            | 298.0               |
| 5 Number of Scans        | 9                   |
| 6 Acquisition Time       | 4.0894              |
| 7 Acquisition Date       | 2022-04-08T22:16:07 |
| 8 Spectrometer Frequency | 400.13              |
| 9 Spectral Width         | 8012.8              |

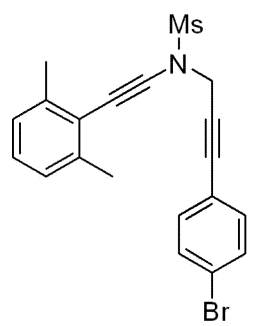

**10**

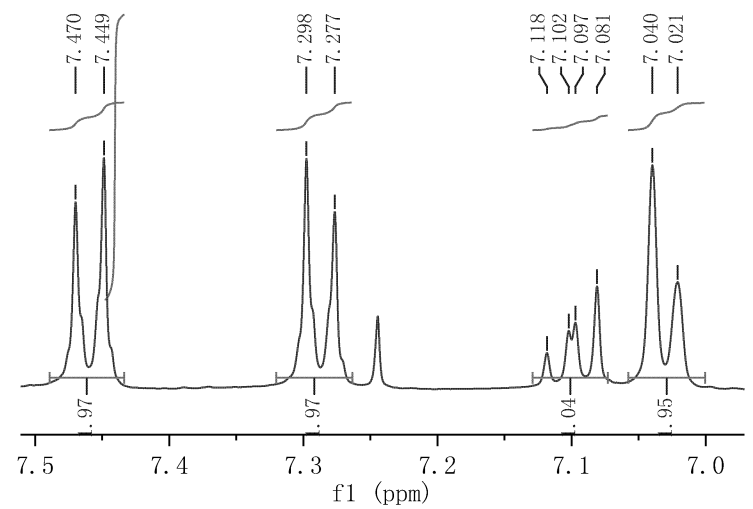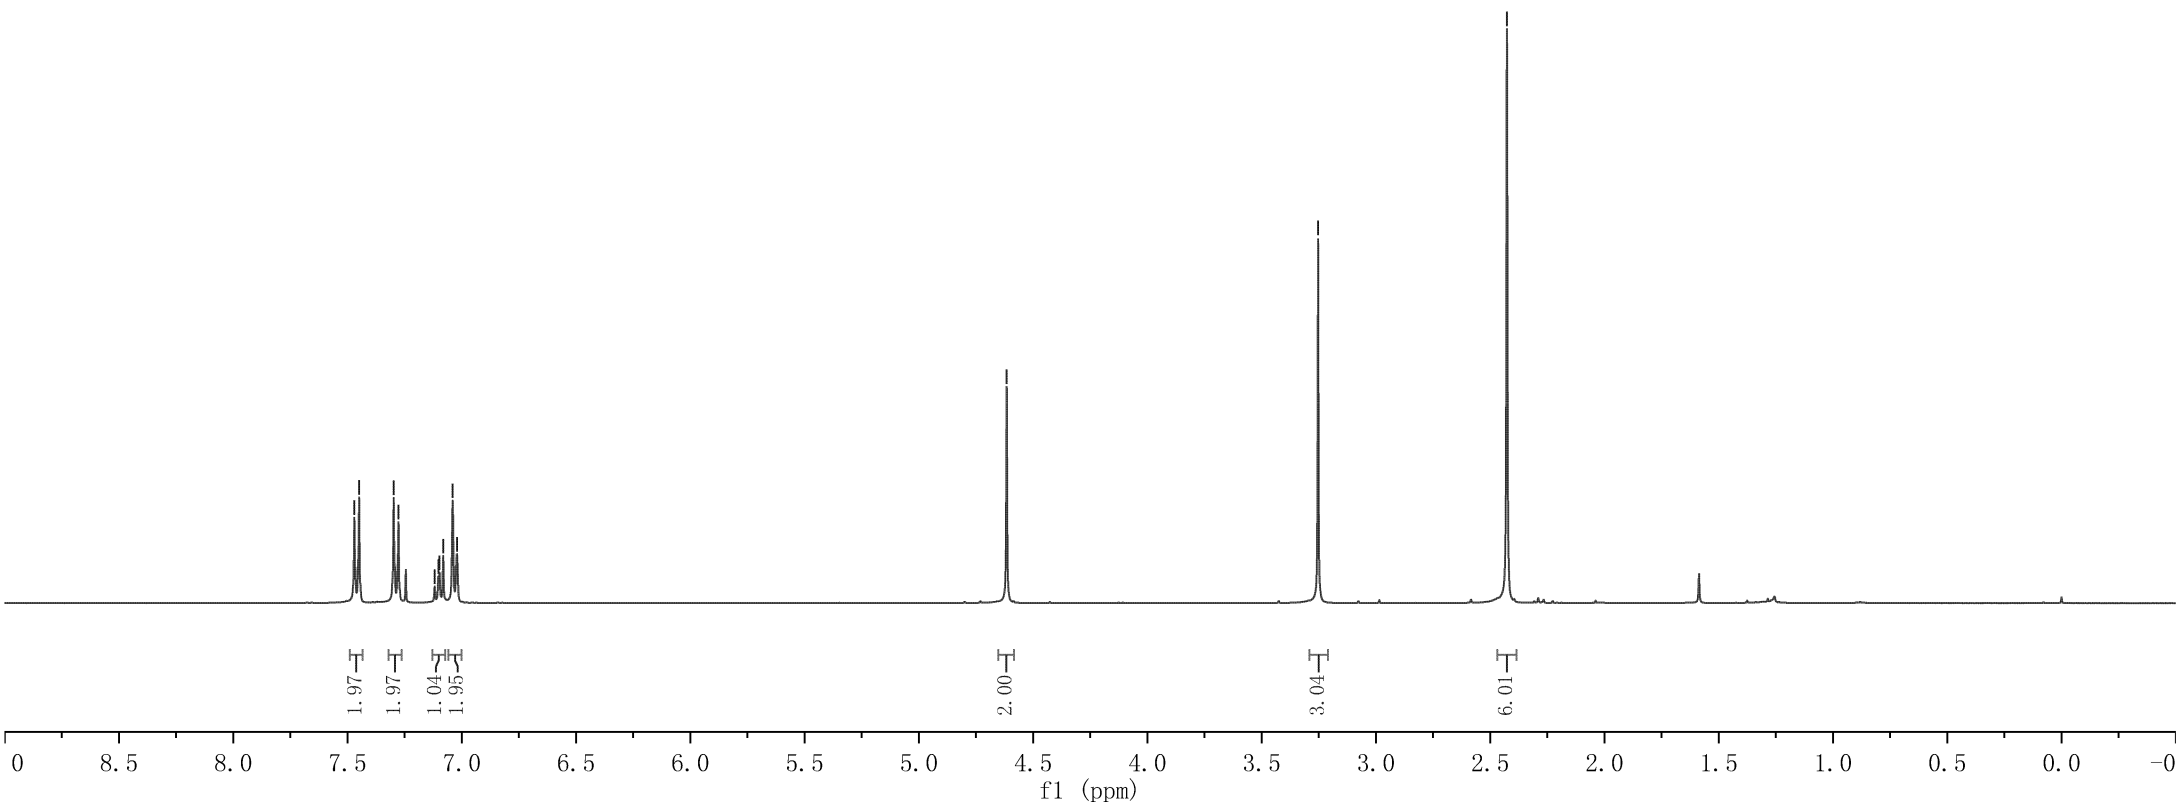

| Parameter                | Value               |
|--------------------------|---------------------|
| 1 Title                  | XHJ-2-13-C          |
| 2 Origin                 |                     |
| 3 Solvent                | CDCl3               |
| 4 Temperature            | 297.6               |
| 5 Number of Scans        | 200                 |
| 6 Acquisition Time       | 1.0000              |
| 7 Acquisition Date       | 2022-04-09T00:30:04 |
| 8 Spectrometer Frequency | 100.56              |
| 9 Spectral Width         | 26041.0             |

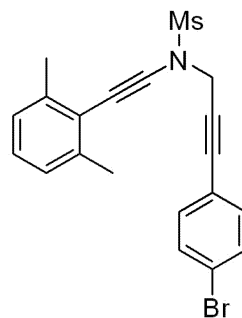

**10**

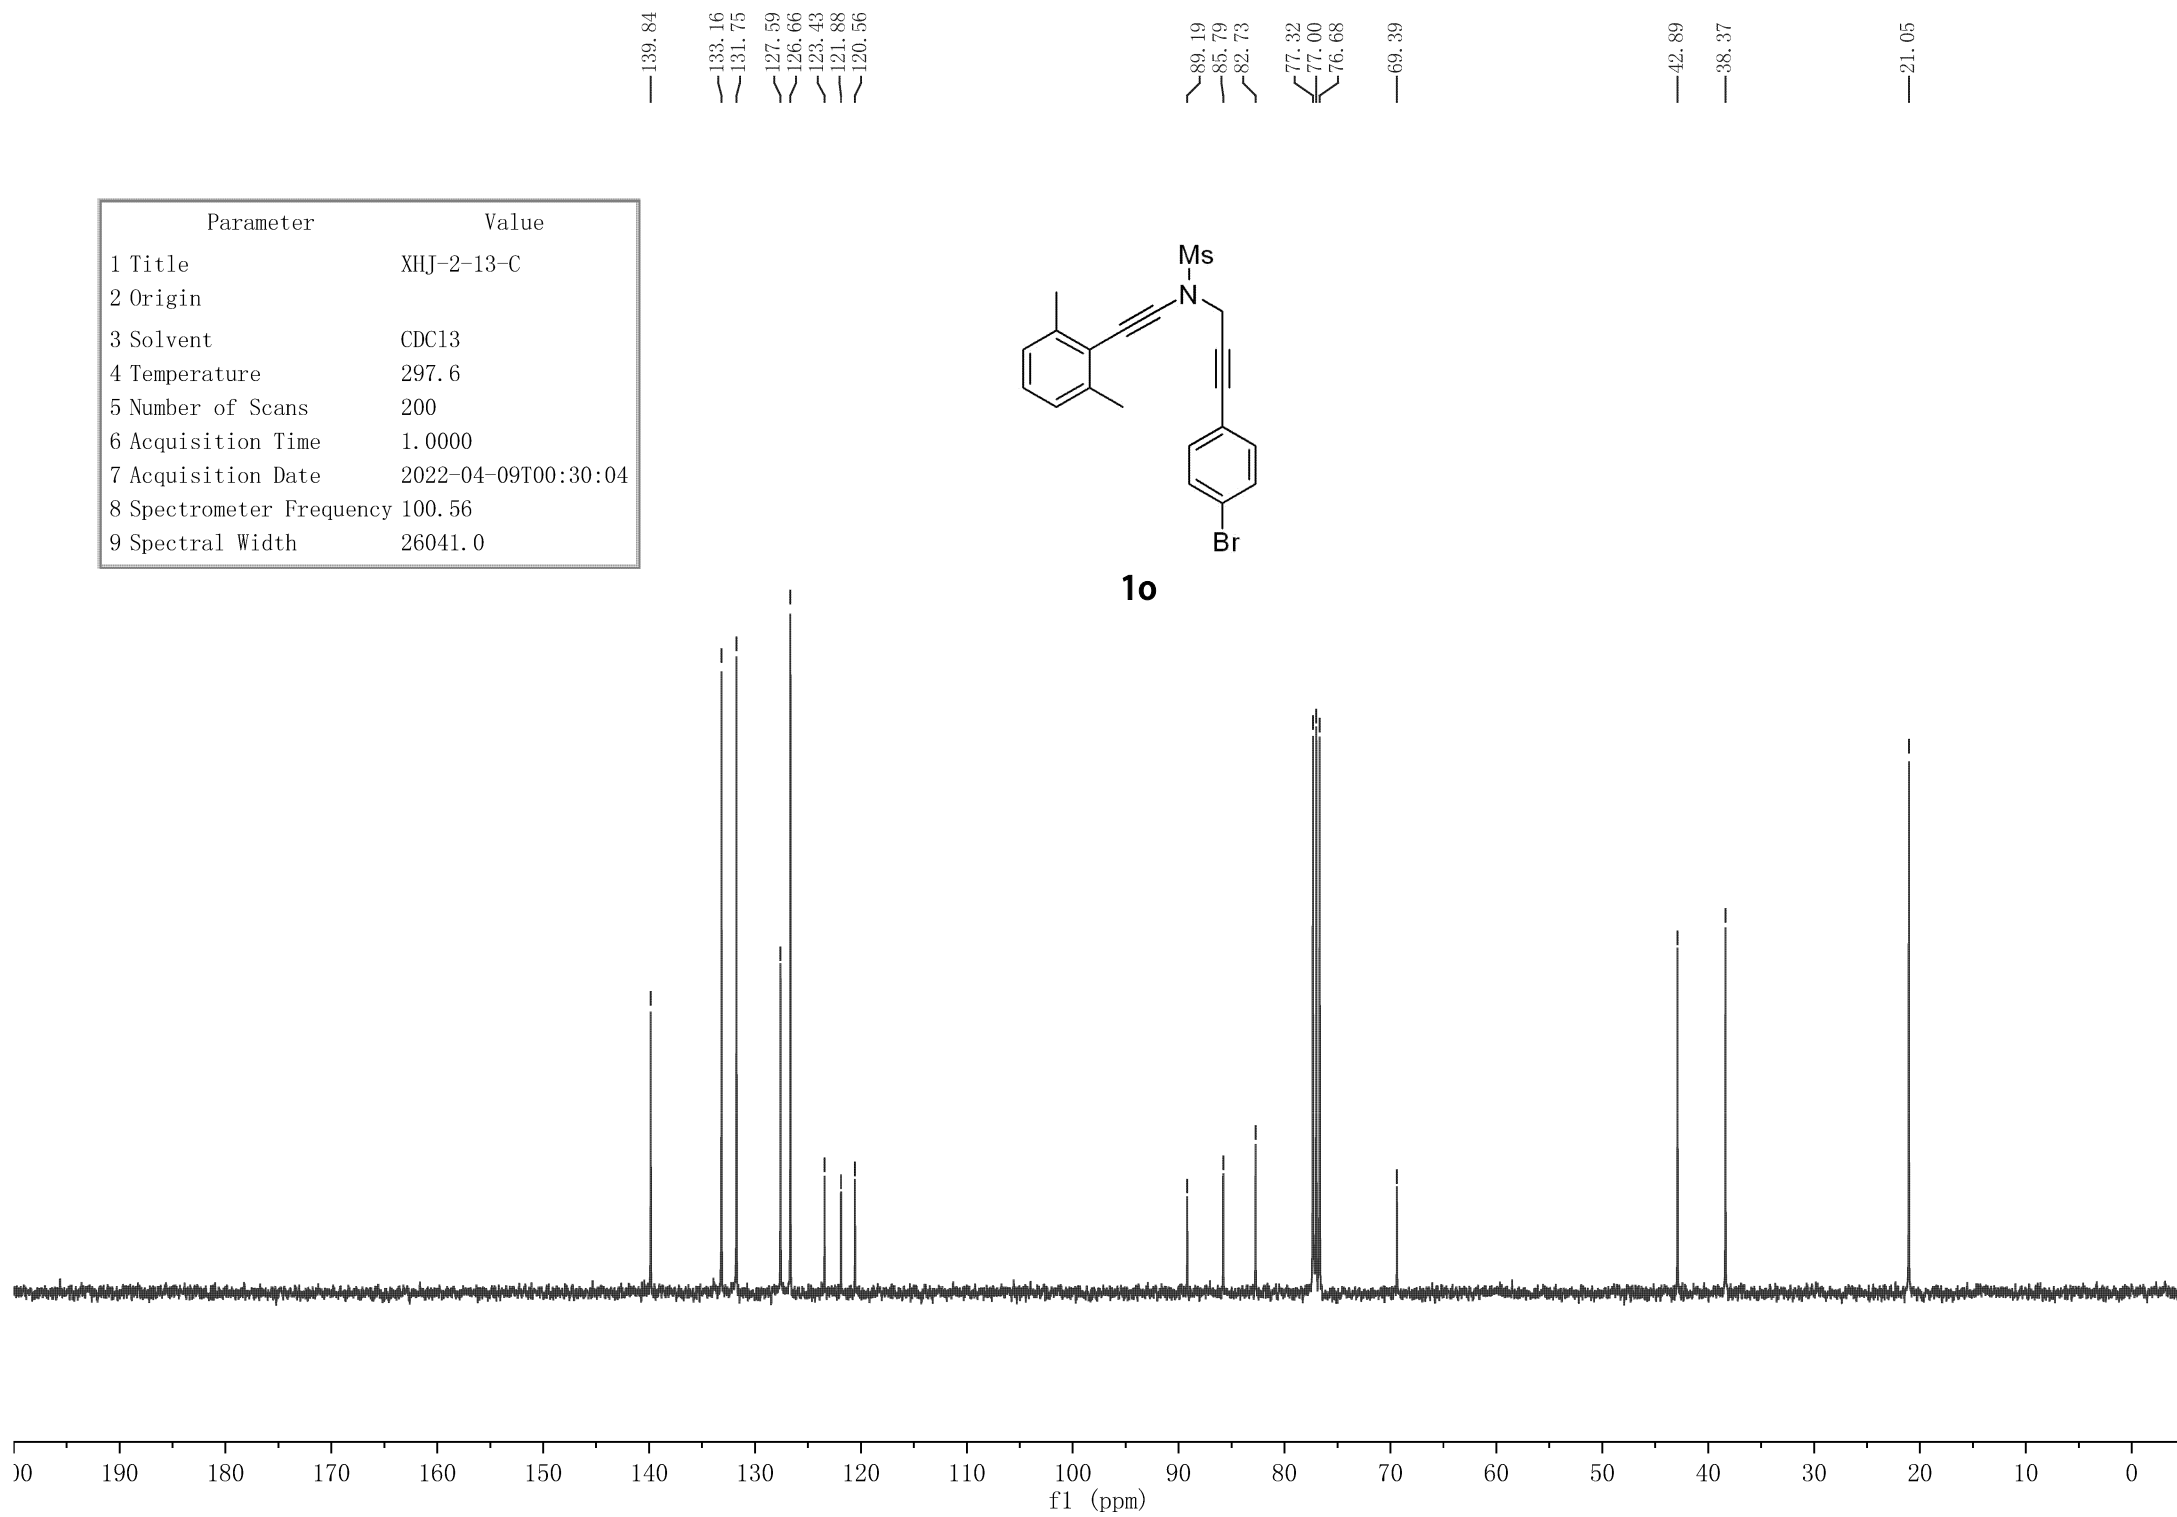

| Parameter                | Value               |
|--------------------------|---------------------|
| 1 Title                  | XHJ-2-8-H           |
| 2 Origin                 | Bruker BioSpin GmbH |
| 3 Solvent                | CDC13               |
| 4 Temperature            | 298.0               |
| 5 Number of Scans        | 22                  |
| 6 Acquisition Time       | 4.0894              |
| 7 Acquisition Date       | 2022-04-06T20:36:29 |
| 8 Spectrometer Frequency | 400.13              |
| 9 Spectral Width         | 8012.8              |

7.332  
7.313  
7.134  
7.114  
7.092  
7.087  
7.071  
7.033  
7.014

4.613

3.257

2.436  
2.346

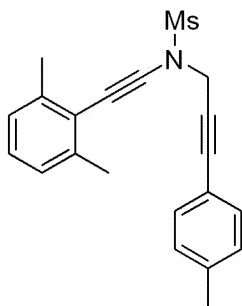

**1p**

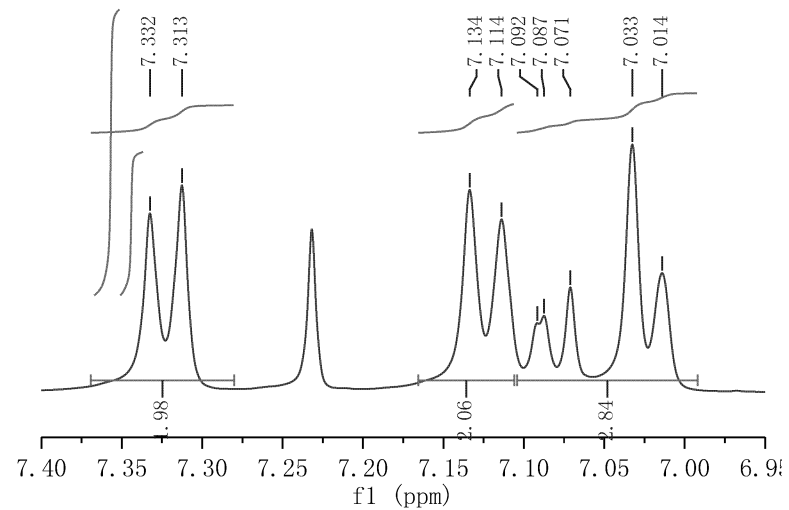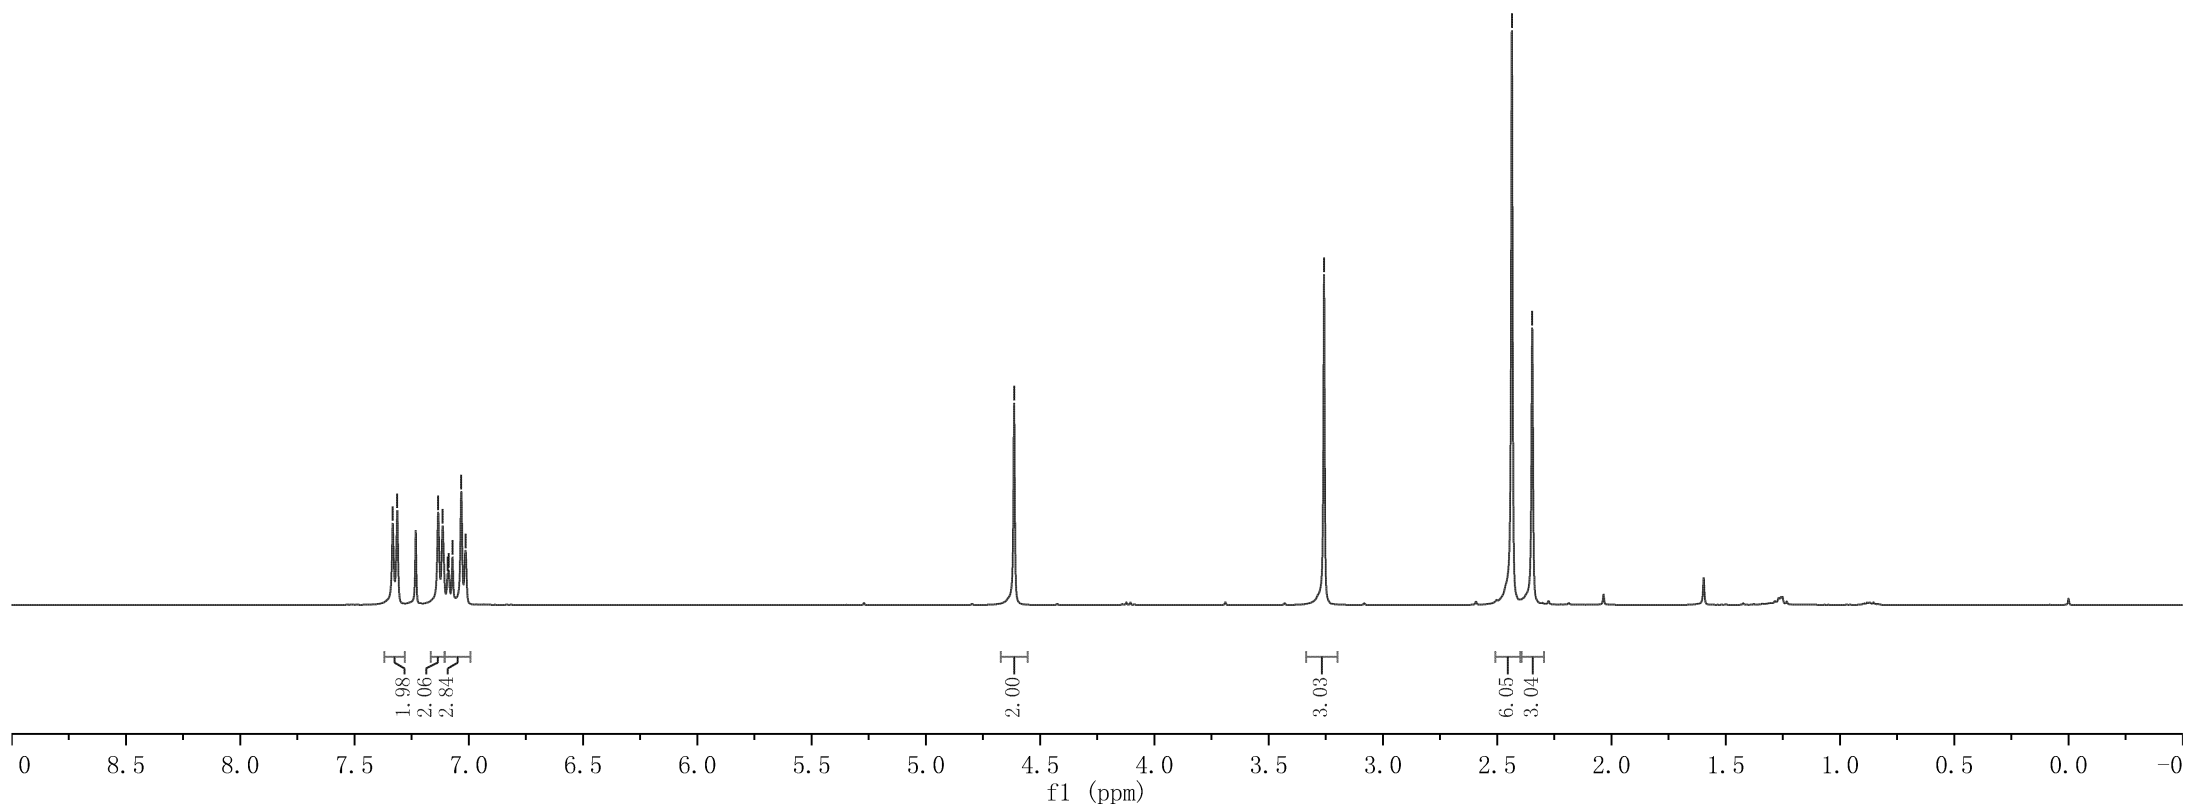

| Parameter                | Value               |
|--------------------------|---------------------|
| 1 Title                  | XHJ-2-8-C           |
| 2 Origin                 | Bruker BioSpin GmbH |
| 3 Solvent                | CDC13               |
| 4 Temperature            | 300.0               |
| 5 Number of Scans        | 61                  |
| 6 Acquisition Time       | 1.3631              |
| 7 Acquisition Date       | 2022-04-06T20:39:07 |
| 8 Spectrometer Frequency | 100.61              |
| 9 Spectral Width         | 24038.5             |

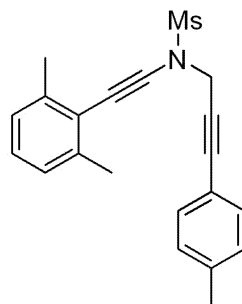

**1p**

139.89  
 139.30  
 131.66  
 129.18  
 127.49  
 126.61  
 122.01  
 118.57  
 89.45  
 87.10  
 80.82  
 77.32  
 77.00  
 76.68  
 69.20  
 43.11  
 38.33  
 21.44  
 21.04

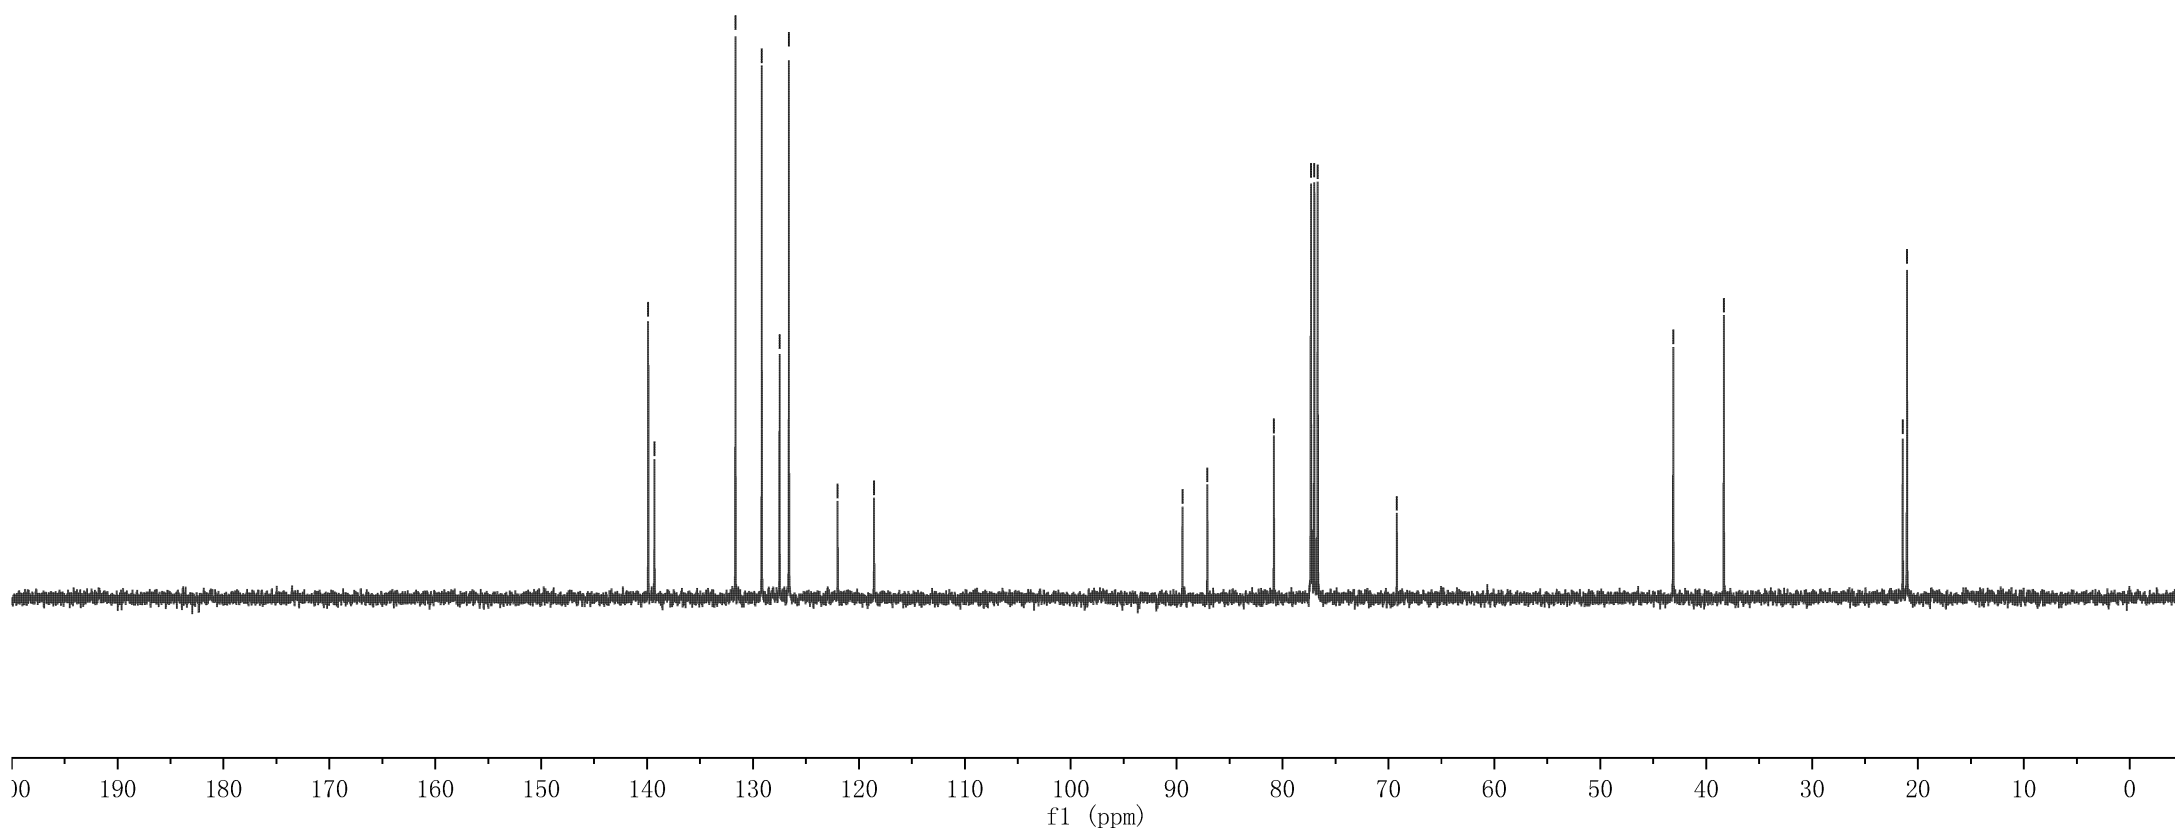

7.376  
7.354  
7.102  
7.086  
7.081  
7.065  
7.027  
7.008  
6.846  
6.824

4.599  
3.785  
3.250  
2.434

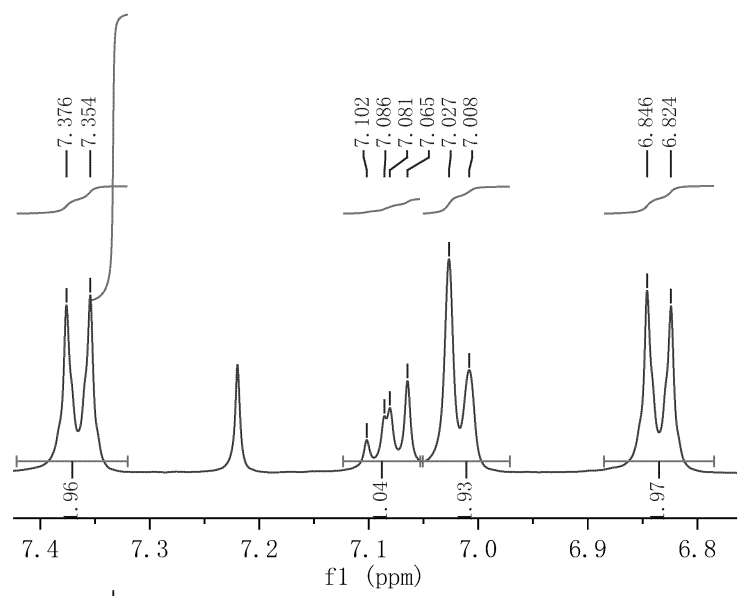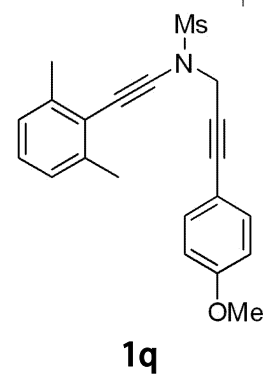

| Parameter                | Value               |
|--------------------------|---------------------|
| 1 Title                  | XHJ-2-30-H          |
| 2 Origin                 | Bruker BioSpin GmbH |
| 3 Solvent                | CDCl3               |
| 4 Temperature            | 298.0               |
| 5 Number of Scans        | 6                   |
| 6 Acquisition Time       | 4.0894              |
| 7 Acquisition Date       | 2022-04-20T11:32:00 |
| 8 Spectrometer Frequency | 400.13              |
| 9 Spectral Width         | 8012.8              |

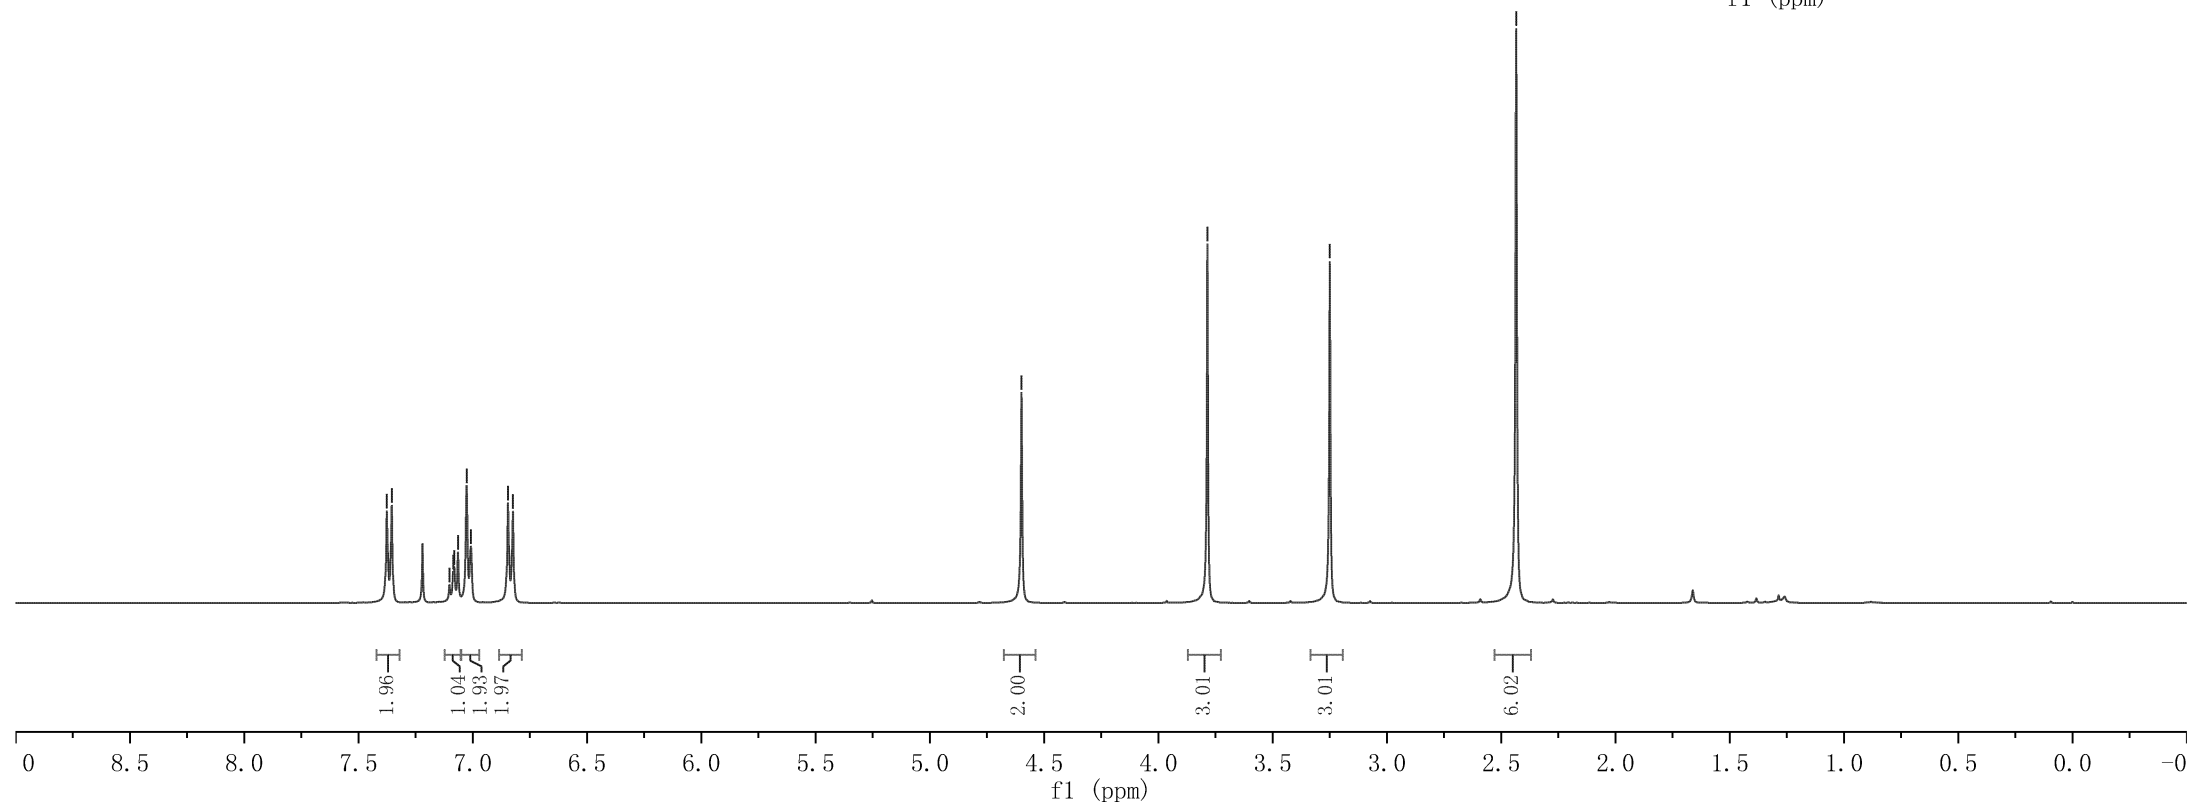



| Parameter                | Value               |
|--------------------------|---------------------|
| 1 Title                  | XHJ-2-30-C          |
| 2 Origin                 | Bruker BioSpin GmbH |
| 3 Solvent                | CDC13               |
| 4 Temperature            | 300.0               |
| 5 Number of Scans        | 26                  |
| 6 Acquisition Time       | 1.3631              |
| 7 Acquisition Date       | 2022-04-20T11:33:25 |
| 8 Spectrometer Frequency | 100.61              |
| 9 Spectral Width         | 24038.5             |

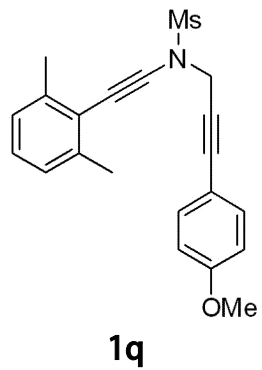

160.08  
 139.79  
 133.23  
 127.43  
 126.56  
 121.97  
 114.00  
 113.58  
 89.47  
 86.91  
 80.10  
 77.32  
 77.00  
 76.68  
 69.13  
 55.19  
 43.09  
 38.26  
 20.98

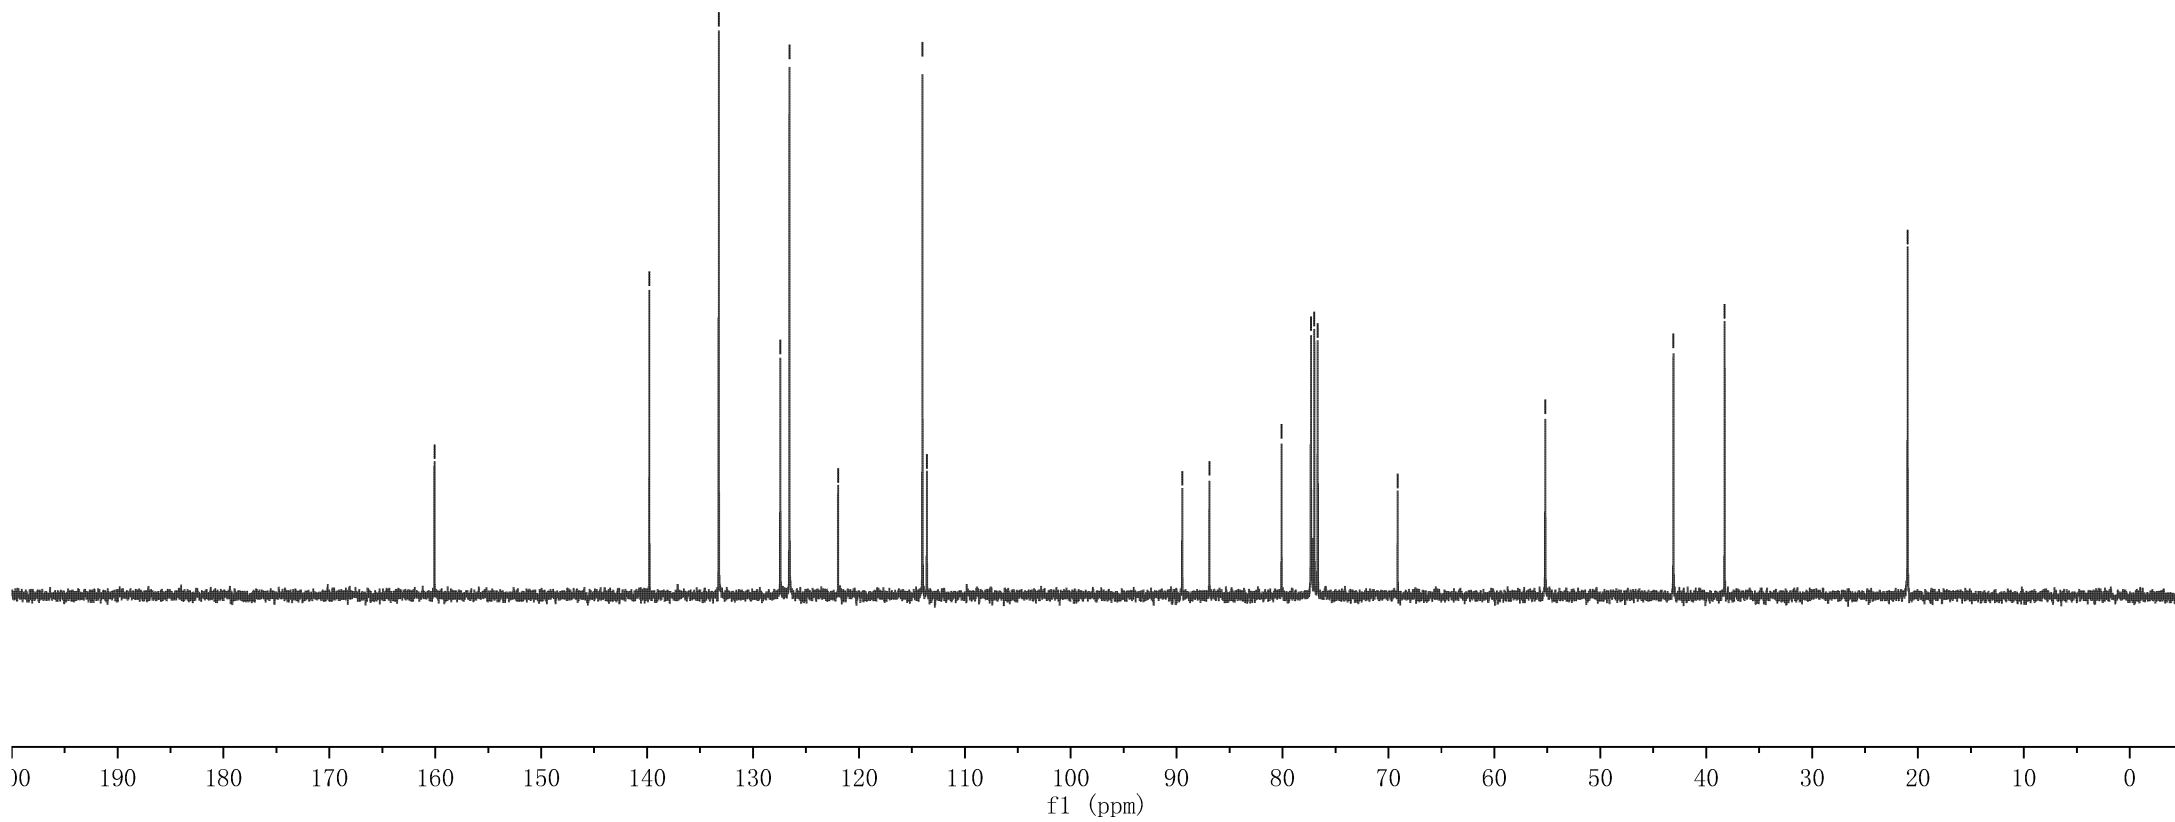

7.571  
7.482  
7.463  
7.362  
7.344  
7.221  
7.198  
7.179  
7.159  
7.108  
7.092  
7.073  
7.034  
7.016

4.615

3.249

2.432

| Parameter                | Value               |
|--------------------------|---------------------|
| 1 Title                  | XHJ-2-40-H          |
| 2 Origin                 | Bruker BioSpin GmbH |
| 3 Solvent                | CDC13               |
| 4 Temperature            | 298.0               |
| 5 Number of Scans        | 7                   |
| 6 Acquisition Time       | 4.0894              |
| 7 Acquisition Date       | 2022-04-27T15:51:03 |
| 8 Spectrometer Frequency | 400.13              |
| 9 Spectral Width         | 8012.8              |

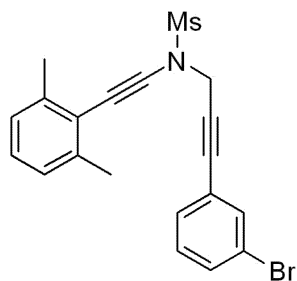

**1r**

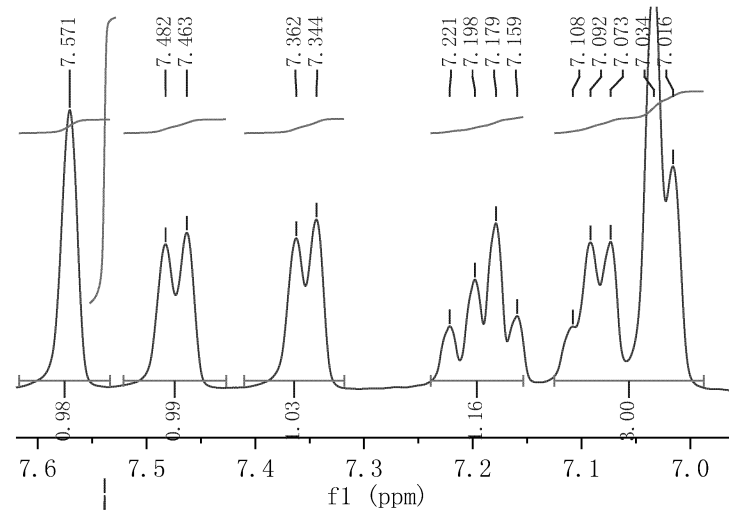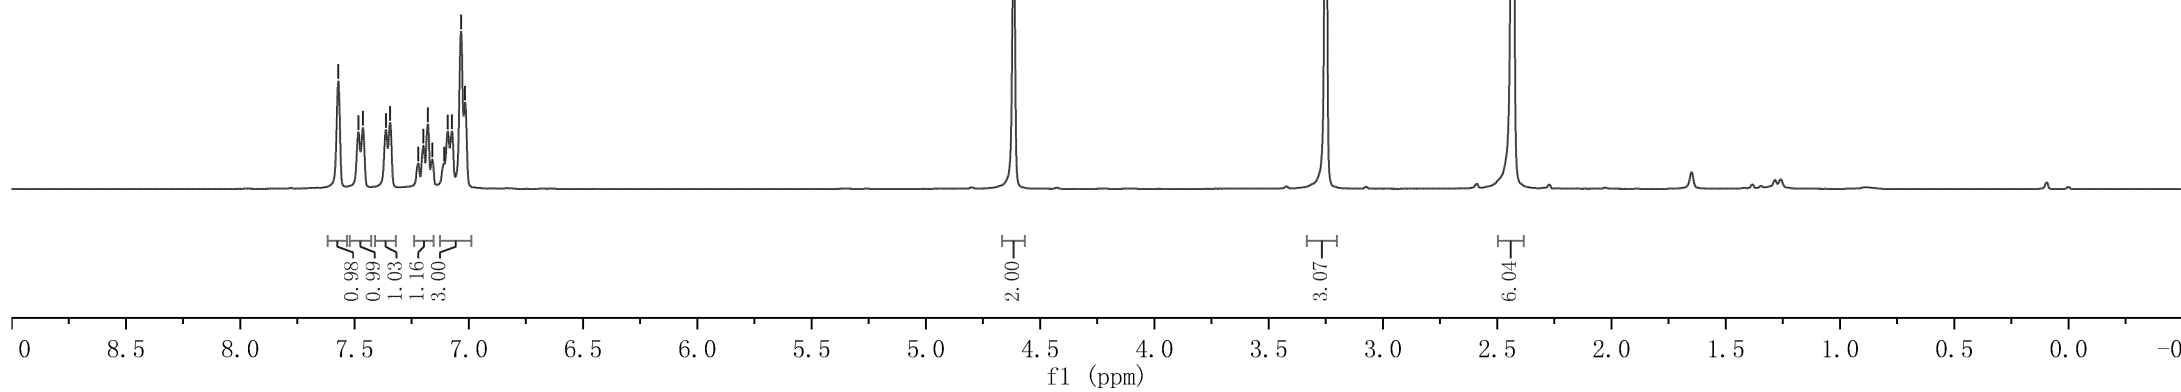

| Parameter                | Value               |
|--------------------------|---------------------|
| 1 Title                  | XHJ-2-40-C          |
| 2 Origin                 | Bruker BioSpin GmbH |
| 3 Solvent                | CDCl3               |
| 4 Temperature            | 300.0               |
| 5 Number of Scans        | 49                  |
| 6 Acquisition Time       | 1.3631              |
| 7 Acquisition Date       | 2022-04-27T15:52:41 |
| 8 Spectrometer Frequency | 100.61              |
| 9 Spectral Width         | 24038.5             |

139.78  
134.39  
132.17  
130.27  
129.85  
127.54  
126.61  
123.54  
122.14  
121.81

89.12  
85.19  
82.91  
77.32  
77.00  
76.68  
69.36

42.71  
38.33

20.97

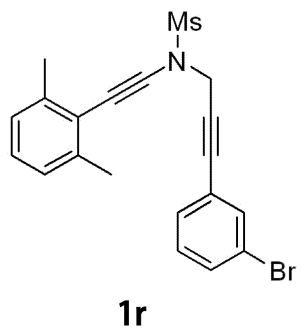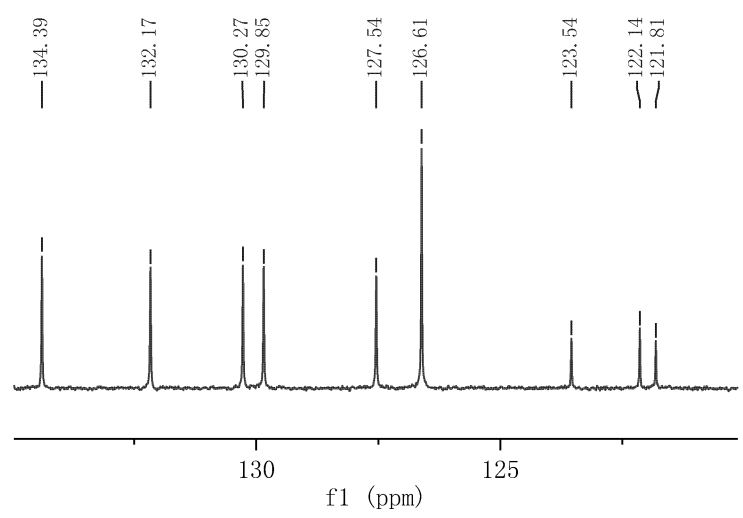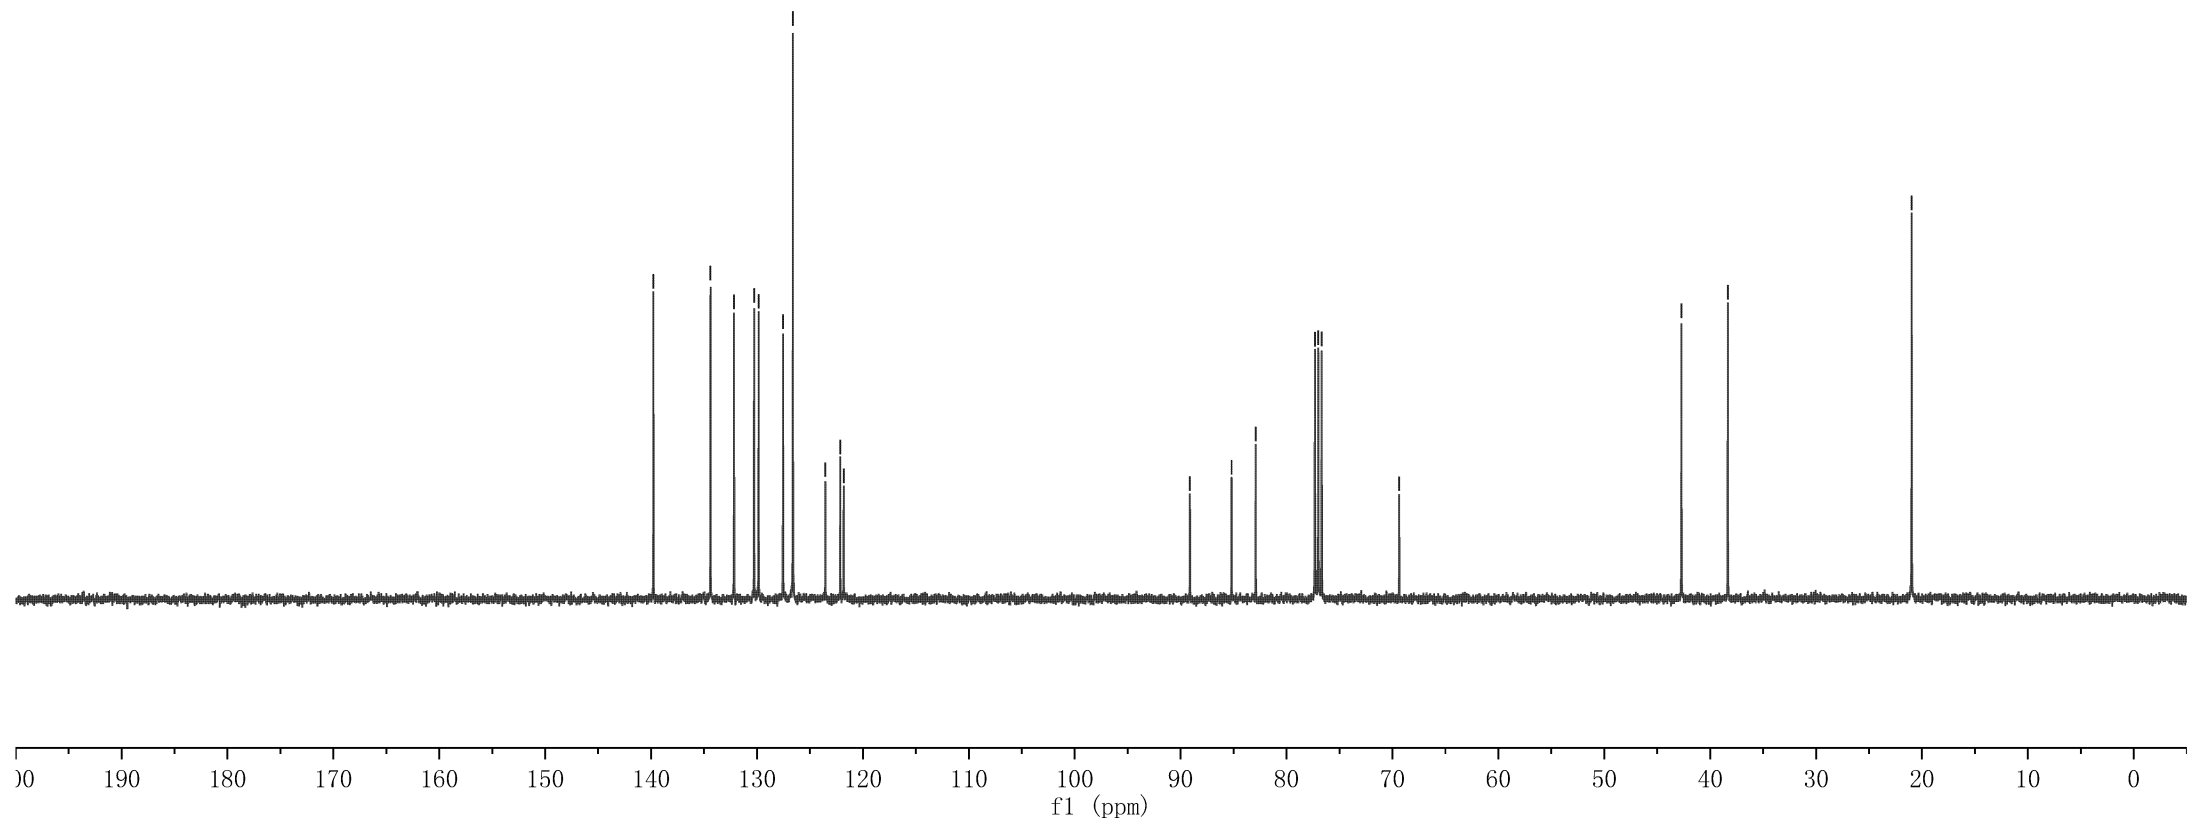

7.243  
7.225  
7.194  
7.184  
7.174  
7.152  
7.133  
7.096  
7.075  
7.059  
7.020  
7.002

4.593

3.243

2.437

2.303

| Parameter                | Value               |
|--------------------------|---------------------|
| 1 Title                  | XHJ-2-54-H          |
| 2 Origin                 | Brüker BioSpin GmbH |
| 3 Solvent                | CDCl <sub>3</sub>   |
| 4 Temperature            | 298.0               |
| 5 Number of Scans        | 11                  |
| 6 Acquisition Time       | 4.0894              |
| 7 Acquisition Date       | 2022-05-03T15:43:38 |
| 8 Spectrometer Frequency | 400.13              |
| 9 Spectral Width         | 8012.8              |

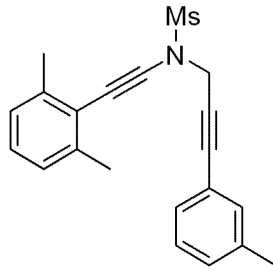

**1s**

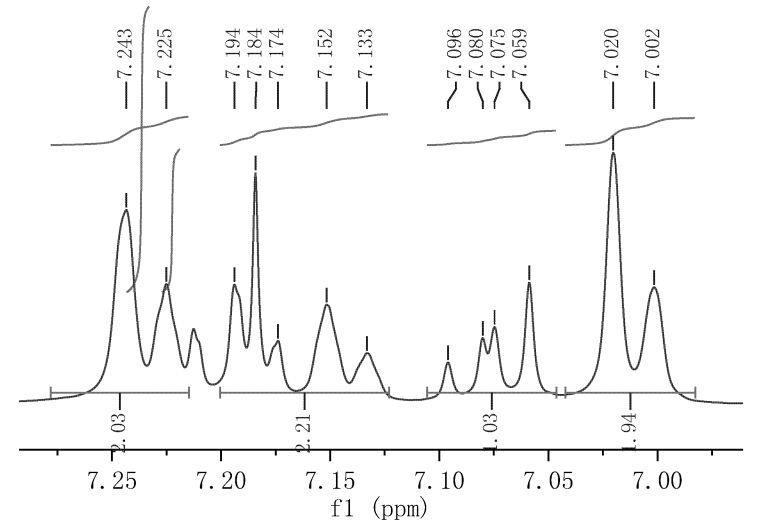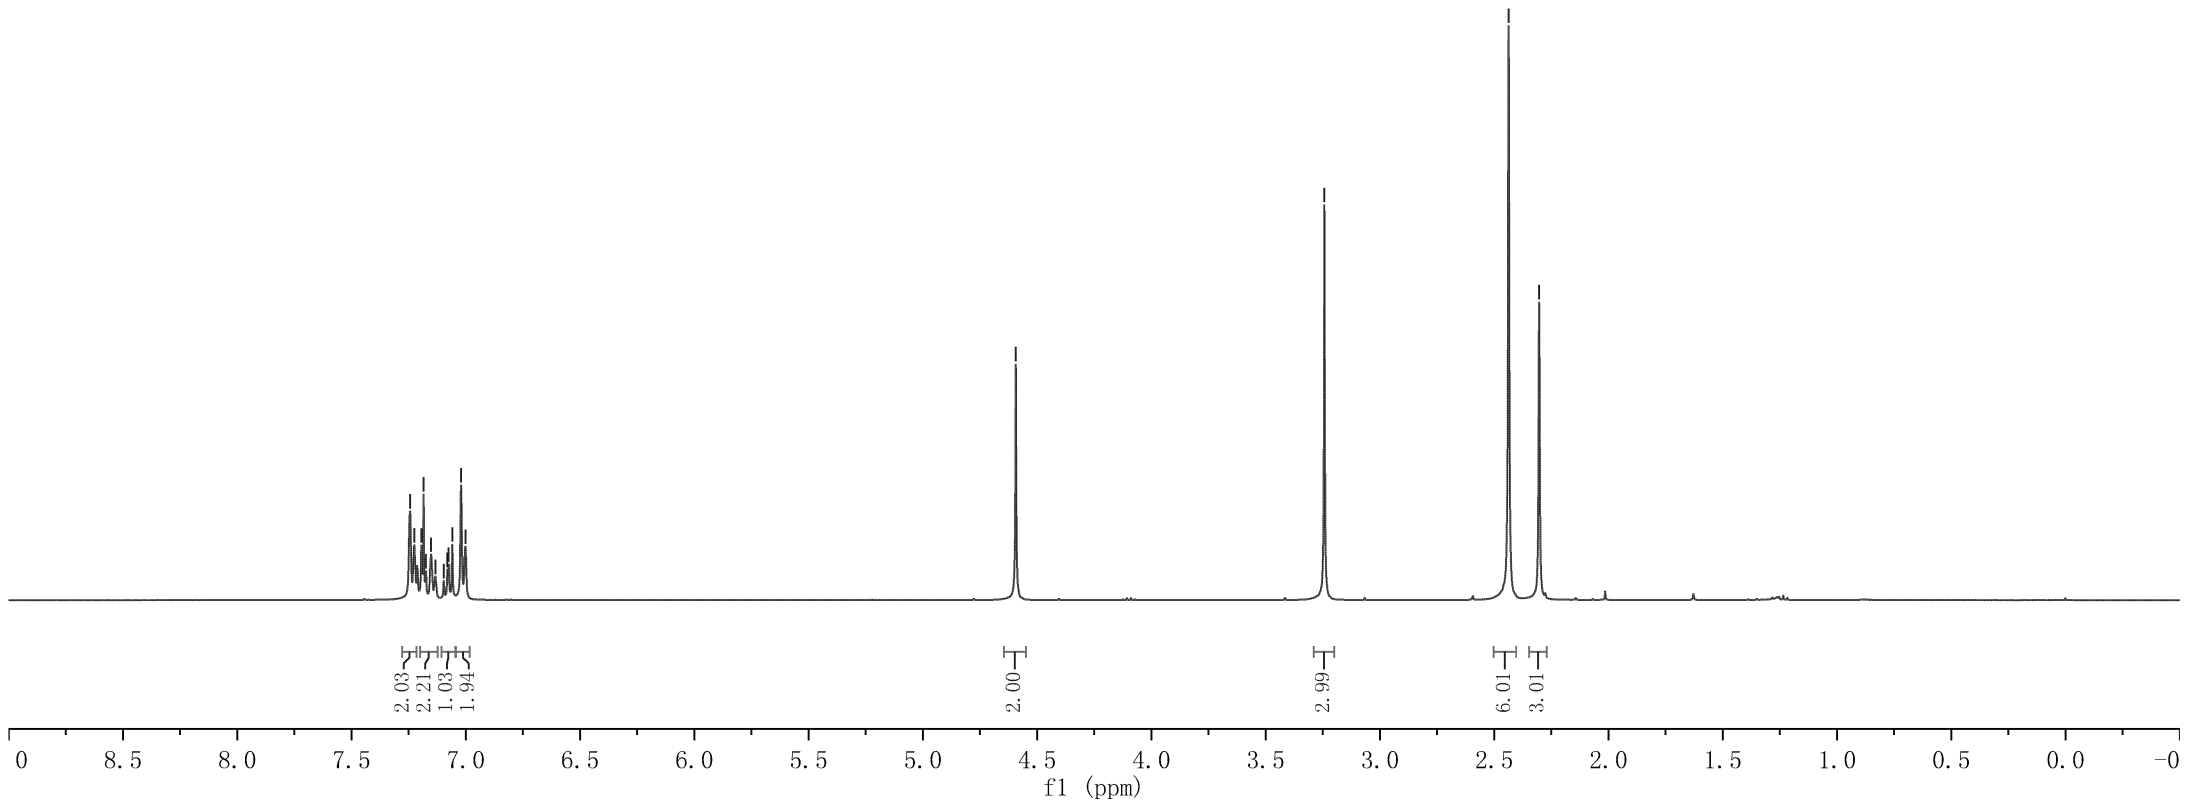

| Parameter                | Value               |
|--------------------------|---------------------|
| 1 Title                  | XHJ-2-54-C          |
| 2 Origin                 | Bruker BioSpin GmbH |
| 3 Solvent                | CDC13               |
| 4 Temperature            | 300.0               |
| 5 Number of Scans        | 14                  |
| 6 Acquisition Time       | 1.3631              |
| 7 Acquisition Date       | 2022-05-03T16:03:44 |
| 8 Spectrometer Frequency | 100.61              |
| 9 Spectral Width         | 24038.5             |

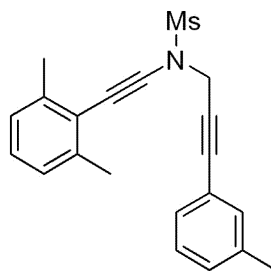

**1s**

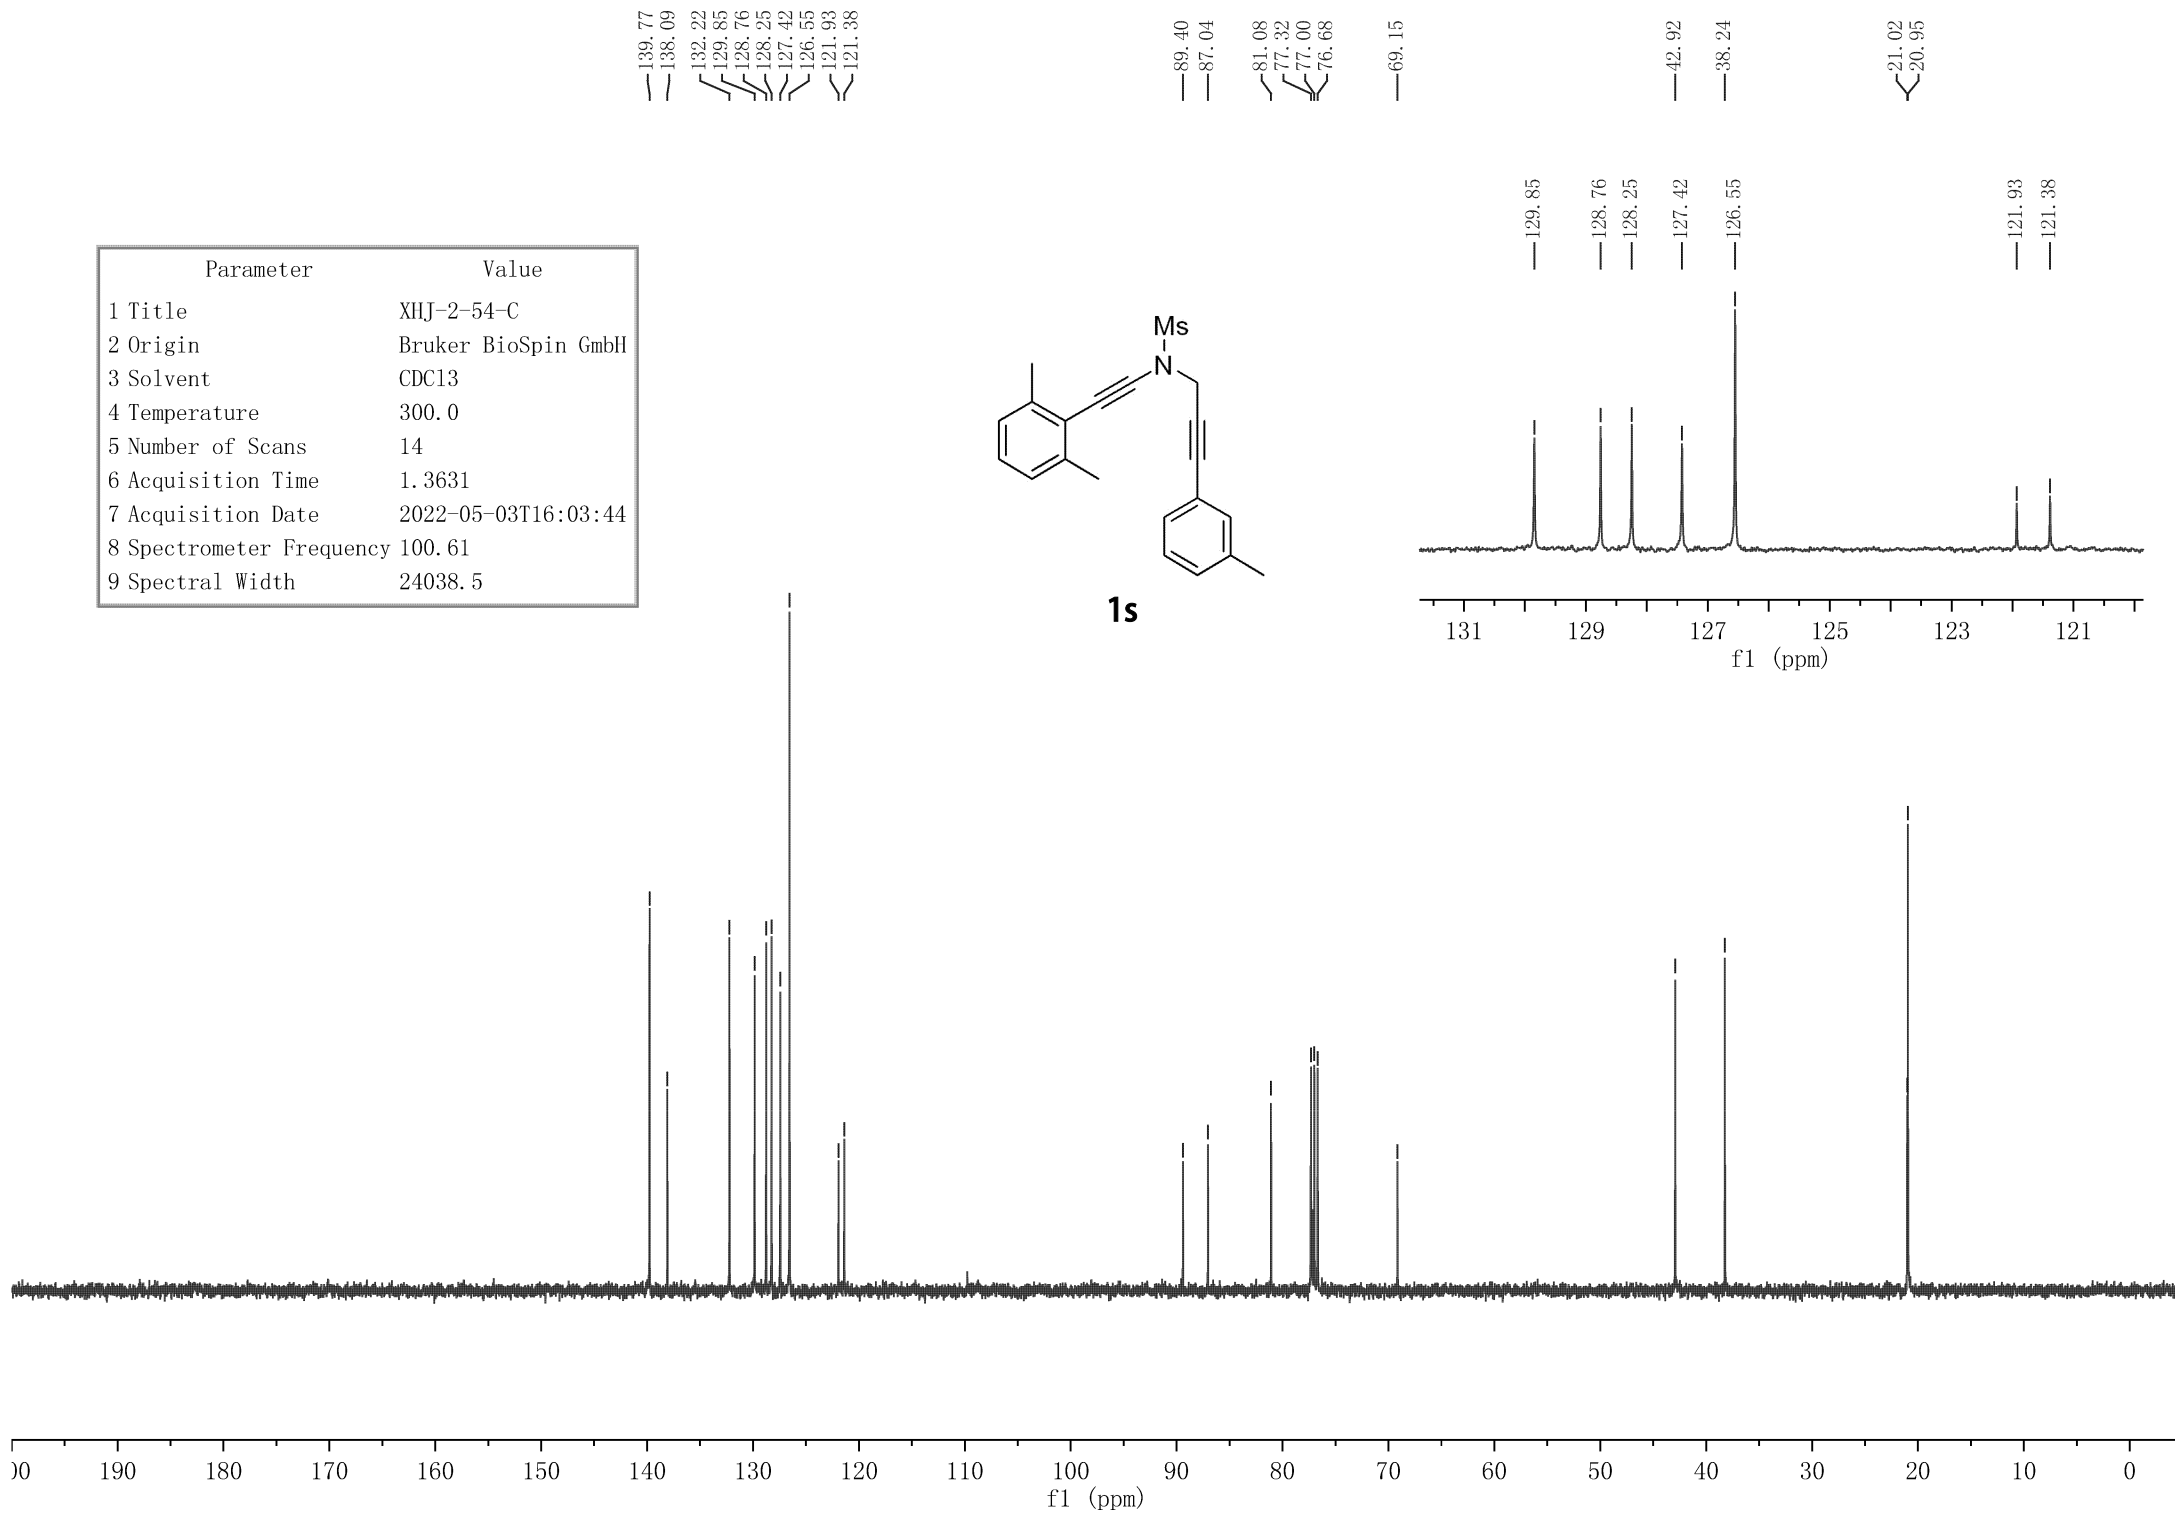

7.567  
7.565  
7.547  
7.545  
7.467  
7.463  
7.448  
7.444  
7.277  
7.274  
7.258  
7.255  
7.239  
7.236  
7.205  
7.200  
7.185  
7.181  
7.166  
7.162  
7.095  
7.079  
7.073  
7.057  
7.015  
6.997

| Parameter                | Value               |
|--------------------------|---------------------|
| 1 Title                  | XHJ-2-41-H          |
| 2 Origin                 |                     |
| 3 Solvent                | CDCl3               |
| 4 Temperature            | 297.0               |
| 5 Number of Scans        | 16                  |
| 6 Acquisition Time       | 4.0002              |
| 7 Acquisition Date       | 2022-04-26T20:52:32 |
| 8 Spectrometer Frequency | 399.92              |
| 9 Spectral Width         | 8012.0              |

4.674

3.312

2.424

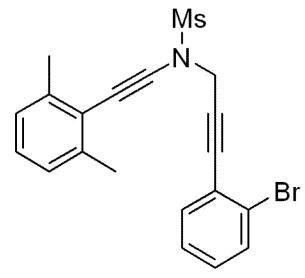

**1t**

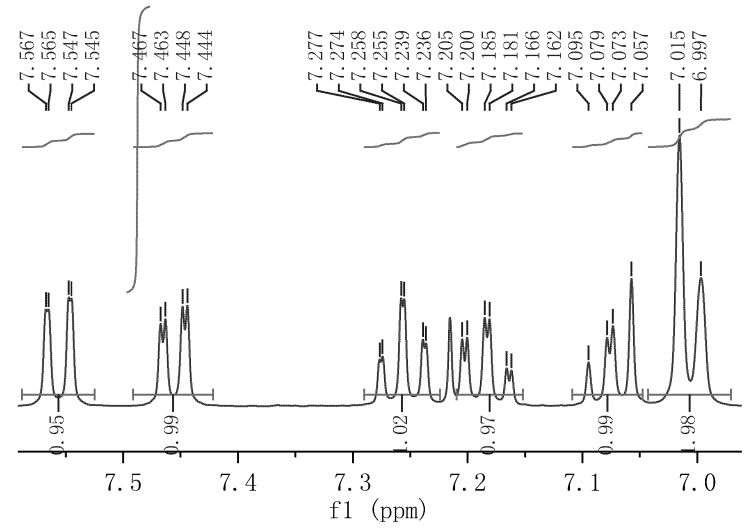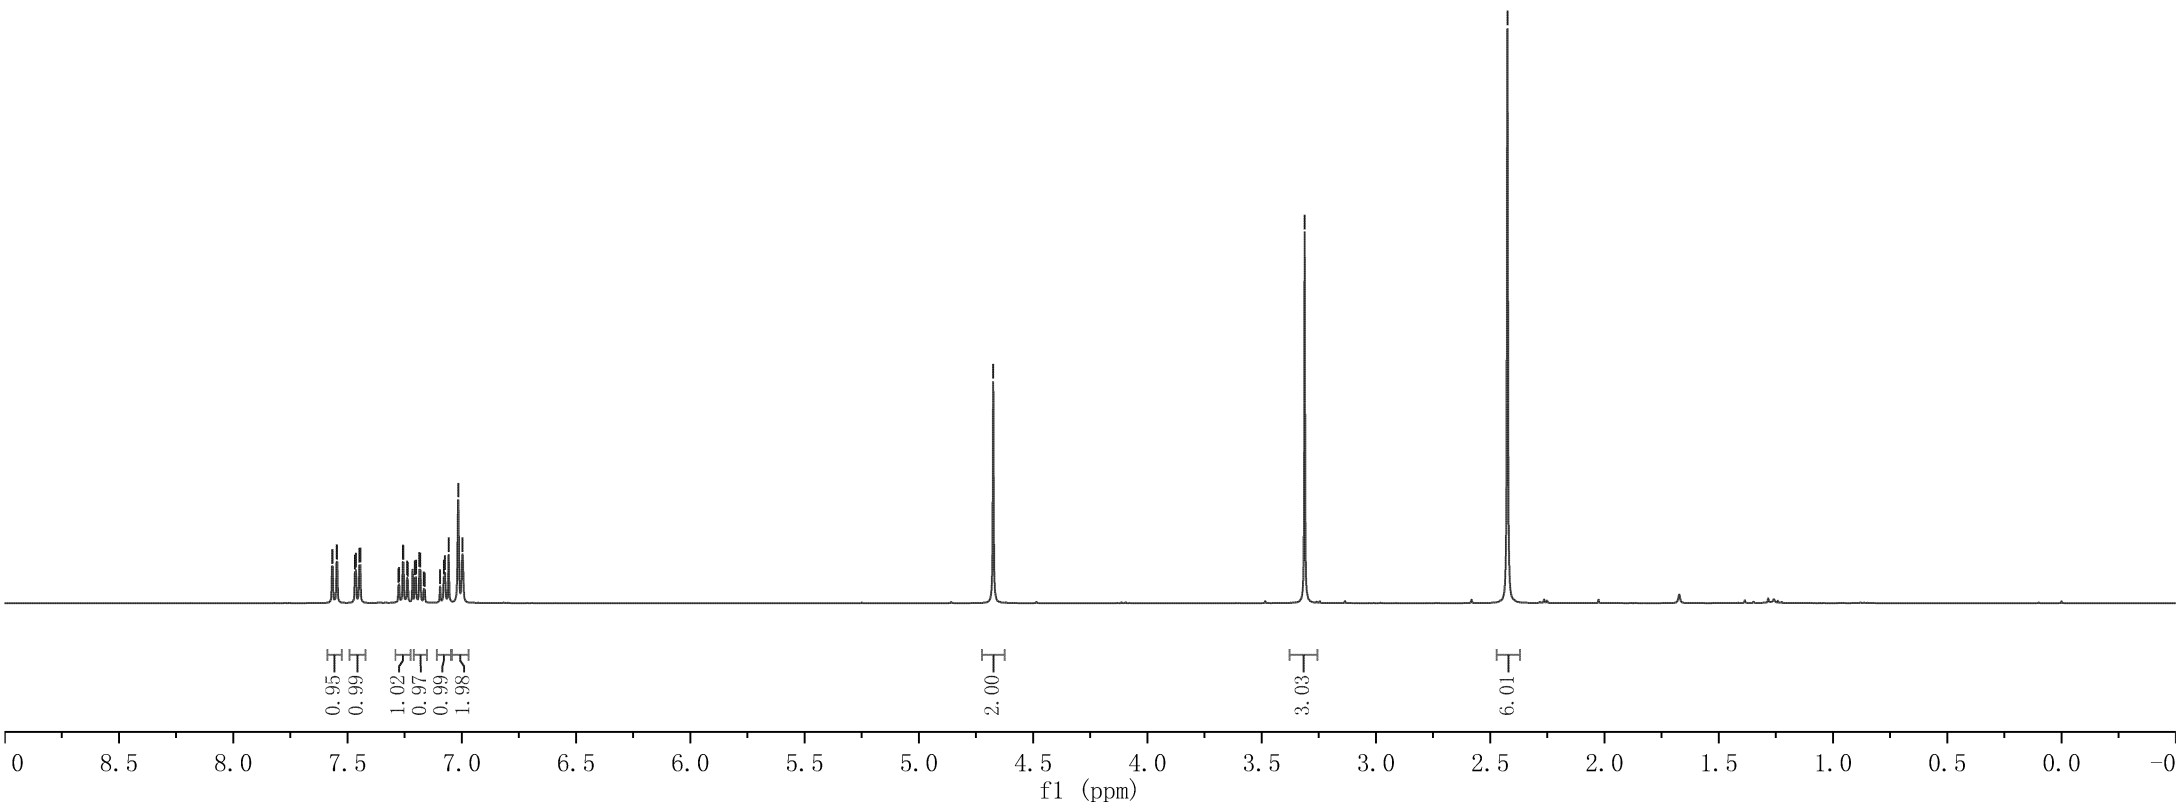

139.76  
133.67  
132.42  
130.16  
127.43  
127.07  
126.54  
125.32  
123.76  
121.87

89.24  
86.03  
85.10  
77.32  
77.00  
76.68  
69.26

42.87  
38.51

21.01

| Parameter                | Value               |
|--------------------------|---------------------|
| 1 Title                  | XHJ-2-41-C          |
| 2 Origin                 |                     |
| 3 Solvent                | CDC13               |
| 4 Temperature            | 297.8               |
| 5 Number of Scans        | 500                 |
| 6 Acquisition Time       | 1.0000              |
| 7 Acquisition Date       | 2022-04-26T21:11:33 |
| 8 Spectrometer Frequency | 100.56              |
| 9 Spectral Width         | 26041.0             |

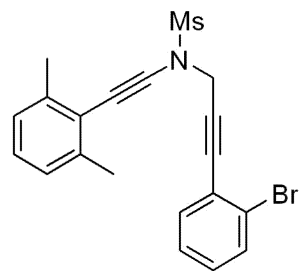

**1t**

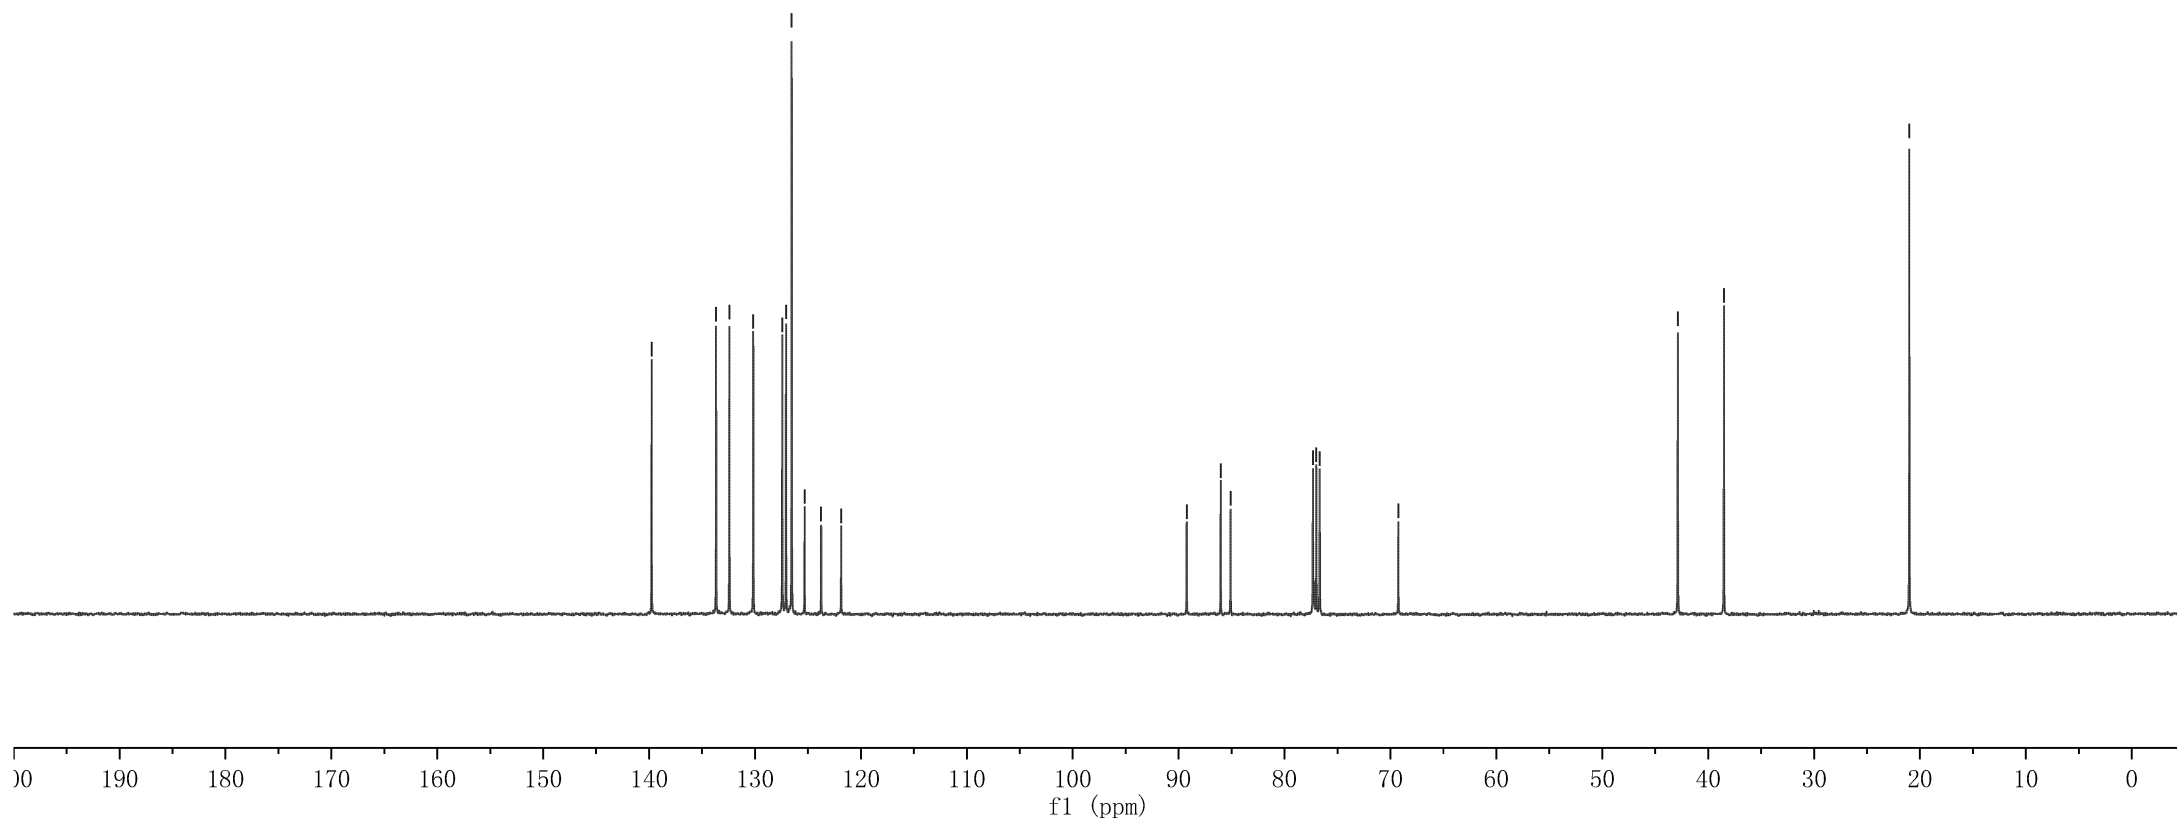

7.402  
7.383  
7.235  
7.217  
7.193  
7.170  
7.143  
7.124  
7.105  
7.094  
7.078  
7.073  
7.057  
7.017  
6.999

4.658

3.247

2.421  
2.411

| Parameter                | Value               |
|--------------------------|---------------------|
| 1 Title                  | XHJ-2-53-H          |
| 2 Origin                 |                     |
| 3 Solvent                | CDCl3               |
| 4 Temperature            | 298.8               |
| 5 Number of Scans        | 16                  |
| 6 Acquisition Time       | 4.0002              |
| 7 Acquisition Date       | 2022-05-03T11:54:04 |
| 8 Spectrometer Frequency | 399.92              |
| 9 Spectral Width         | 8012.0              |

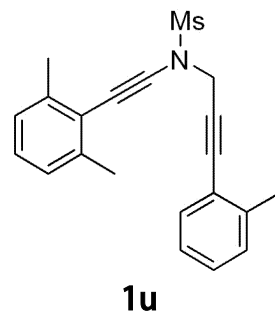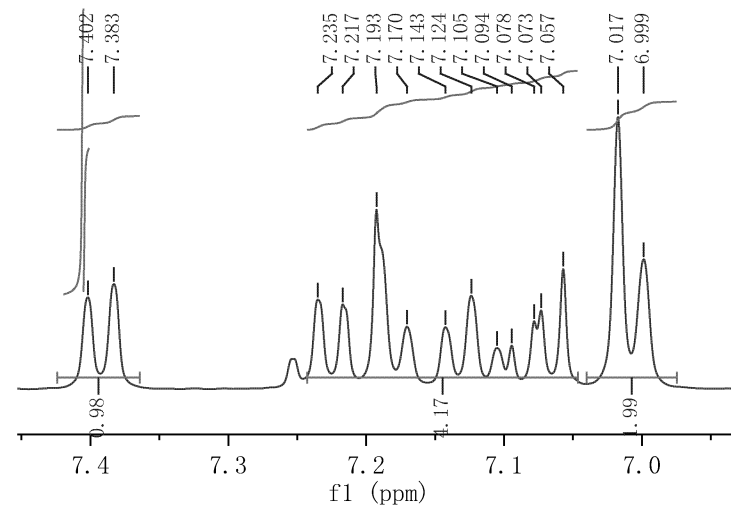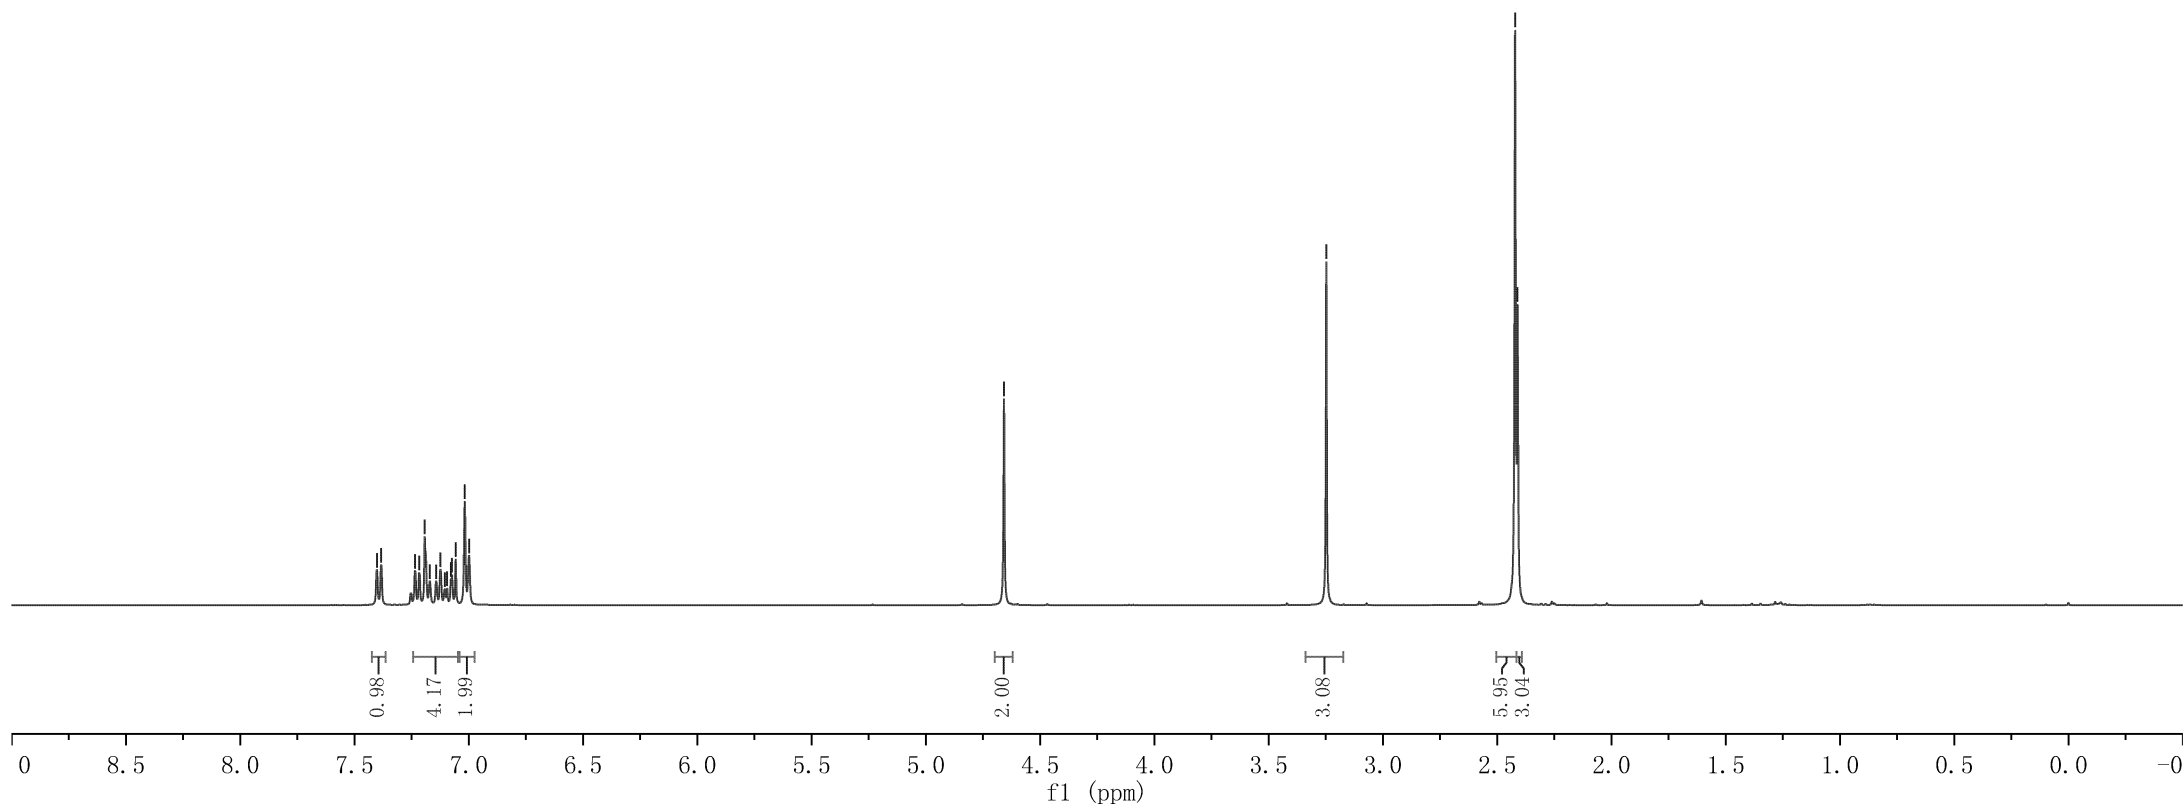



| Parameter                | Value               |
|--------------------------|---------------------|
| 1 Title                  | XHJ-2-53-C          |
| 2 Origin                 |                     |
| 3 Solvent                | CDC13               |
| 4 Temperature            | 298.8               |
| 5 Number of Scans        | 400                 |
| 6 Acquisition Time       | 1.0000              |
| 7 Acquisition Date       | 2022-05-03T12:09:31 |
| 8 Spectrometer Frequency | 100.56              |
| 9 Spectral Width         | 26041.0             |

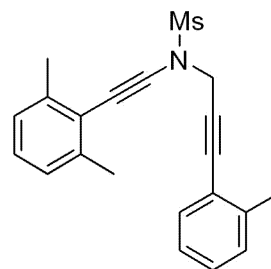

**1u**

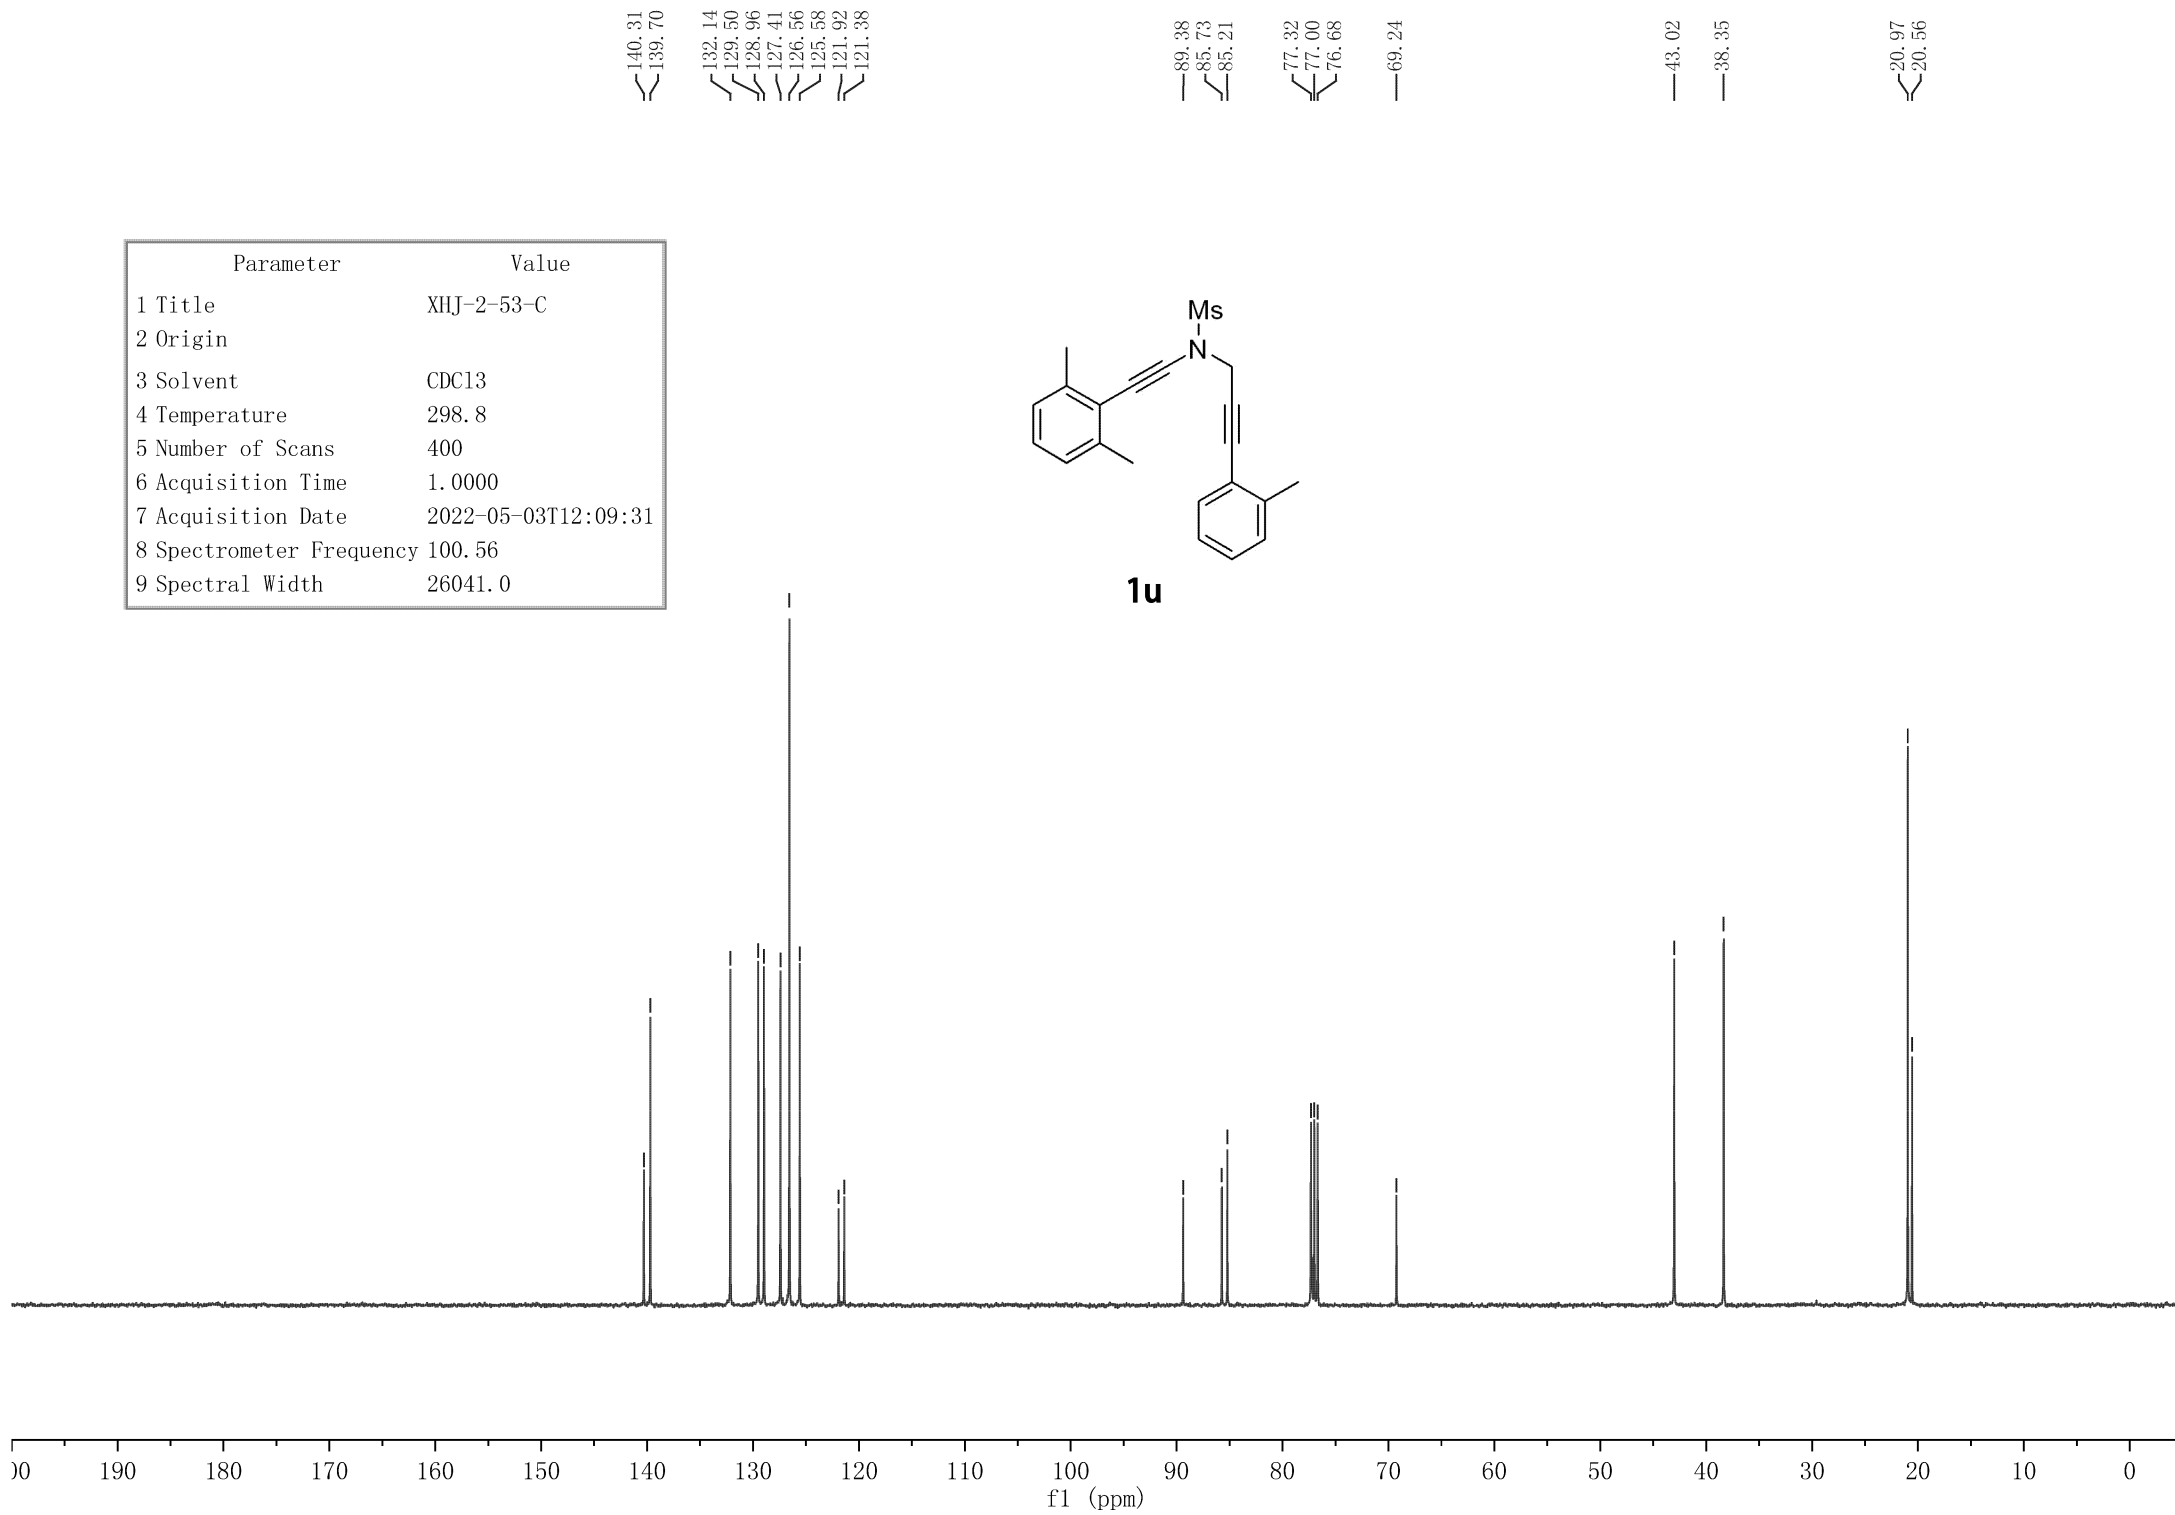

| Parameter                | Value               |
|--------------------------|---------------------|
| 1 Title                  | XHJ-2-46-H          |
| 2 Origin                 |                     |
| 3 Solvent                | CDCl3               |
| 4 Temperature            | 297.6               |
| 5 Number of Scans        | 16                  |
| 6 Acquisition Time       | 4.0002              |
| 7 Acquisition Date       | 2022-04-28T14:57:23 |
| 8 Spectrometer Frequency | 399.92              |
| 9 Spectral Width         | 8012.0              |

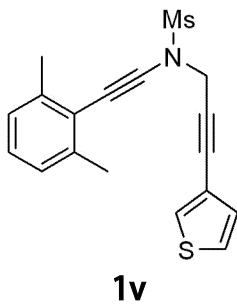

7.453  
7.446  
7.249  
7.241  
7.236  
7.229  
7.092  
7.082  
7.076  
7.071  
7.055  
7.015  
6.996

4.571

3.221

2.428

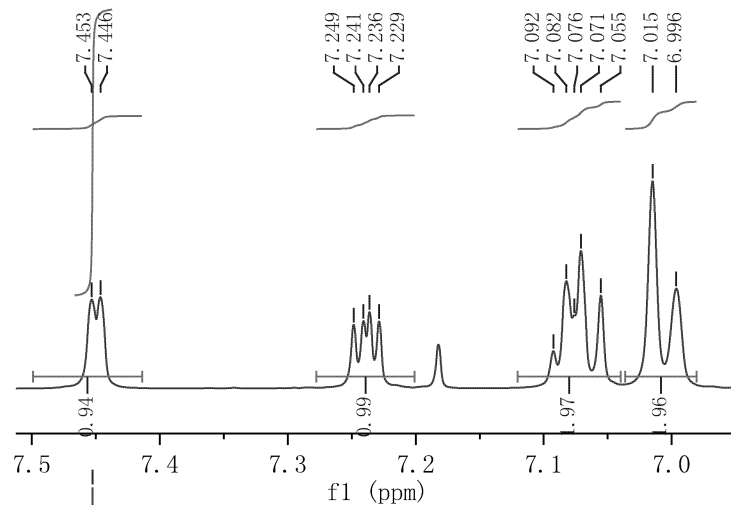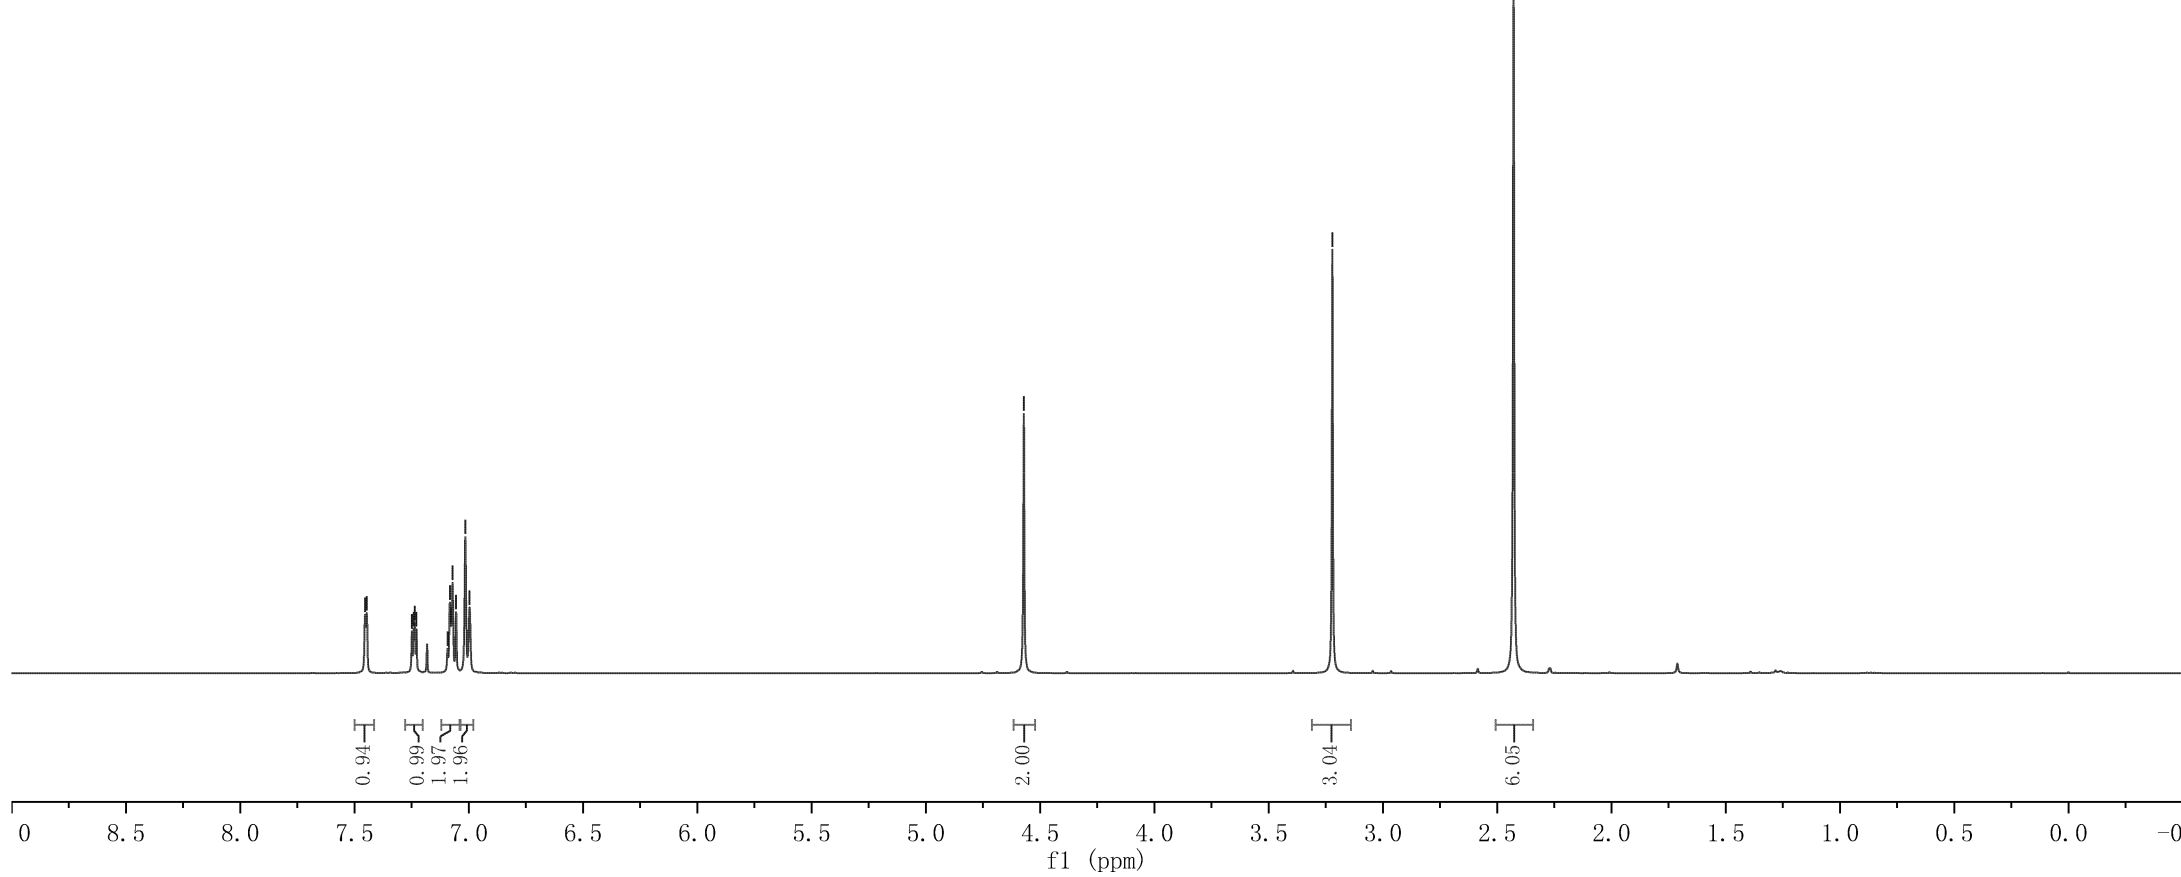

| Parameter                | Value               |
|--------------------------|---------------------|
| 1 Title                  | XHJ-2-46-C          |
| 2 Origin                 |                     |
| 3 Solvent                | CDC13               |
| 4 Temperature            | 297.9               |
| 5 Number of Scans        | 600                 |
| 6 Acquisition Time       | 1.0000              |
| 7 Acquisition Date       | 2022-04-28T15:19:29 |
| 8 Spectrometer Frequency | 100.56              |
| 9 Spectral Width         | 26041.0             |

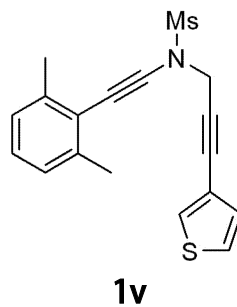

139.65  
 129.79  
 129.51  
 127.38  
 126.50  
 125.62  
 121.81  
 120.50  
 89.29  
 81.97  
 81.13  
 77.32  
 77.00  
 76.68  
 69.12  
 42.82  
 38.13  
 20.89

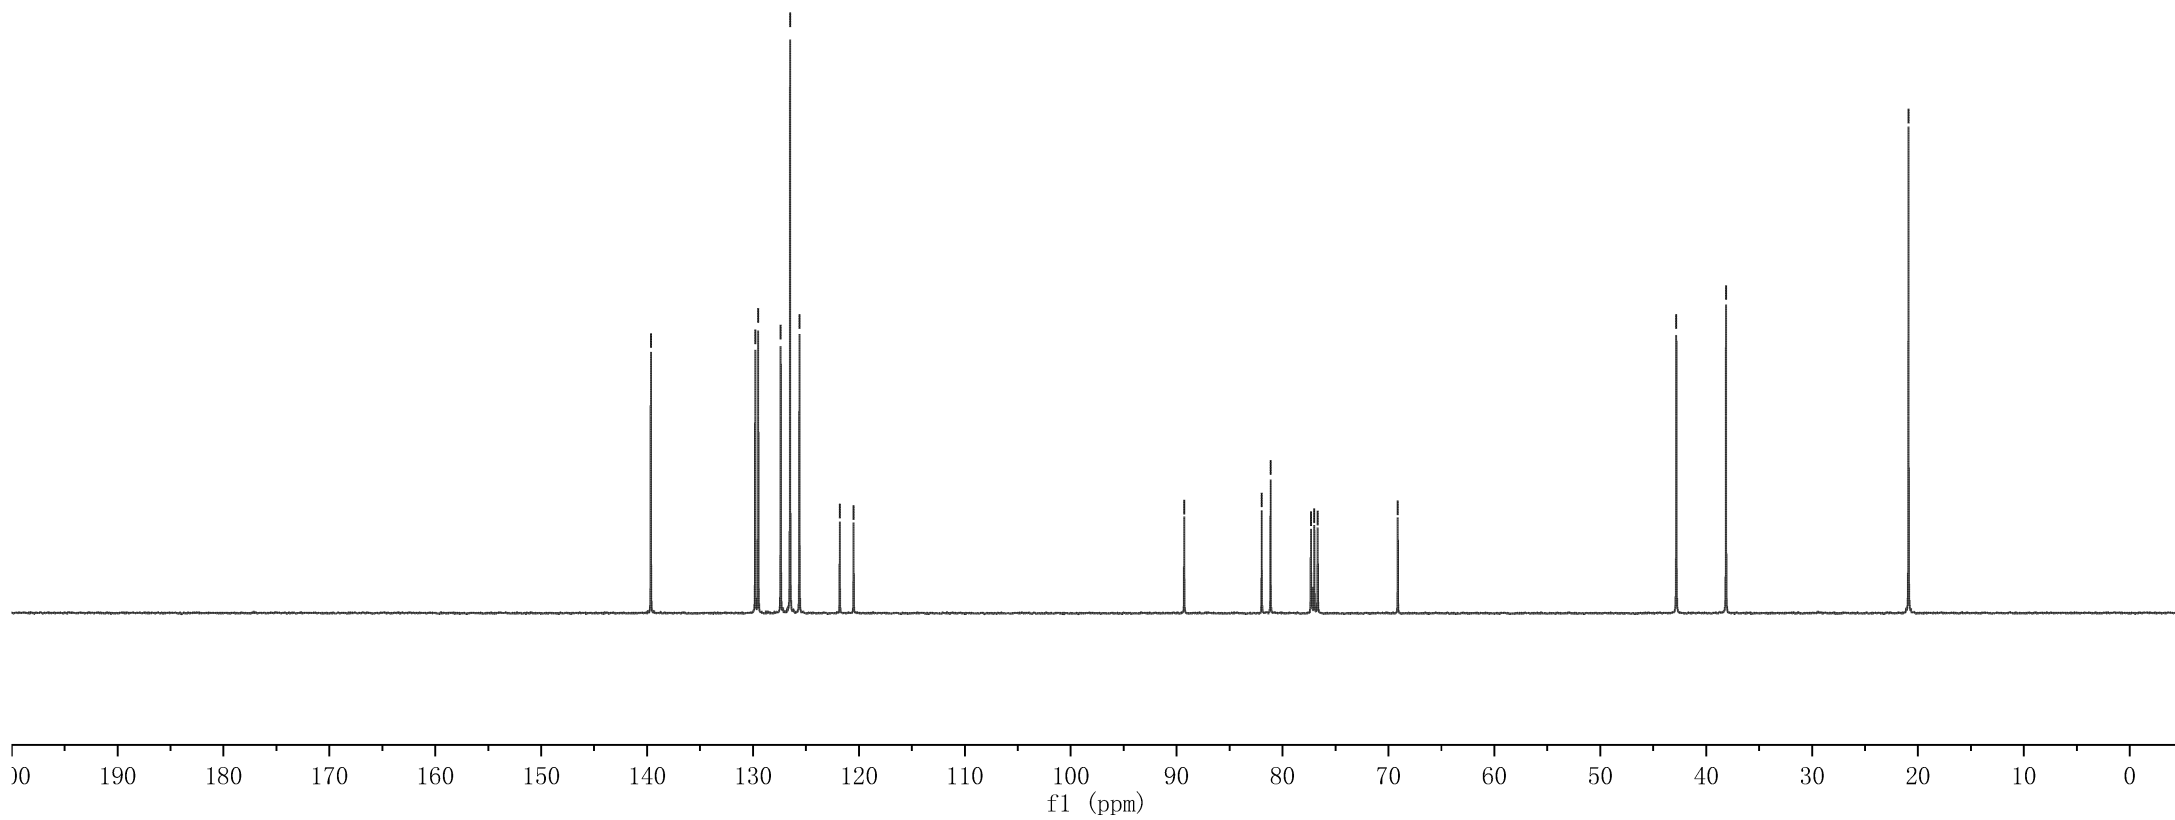

7.354  
7.351  
7.341  
7.338  
7.309  
7.307  
7.300  
7.298  
7.179  
7.163  
7.158  
7.142  
7.102  
7.083  
7.052  
7.043  
7.039  
7.030

| Parameter                | Value               |
|--------------------------|---------------------|
| 1 Title                  | XHJ-2-62-H          |
| 2 Origin                 | Bruker BioSpin GmbH |
| 3 Solvent                | CDC13               |
| 4 Temperature            | 298.0               |
| 5 Number of Scans        | 3                   |
| 6 Acquisition Time       | 4.0894              |
| 7 Acquisition Date       | 2022-05-10T20:59:33 |
| 8 Spectrometer Frequency | 400.13              |
| 9 Spectral Width         | 8012.8              |

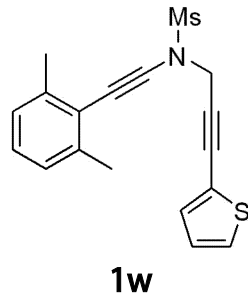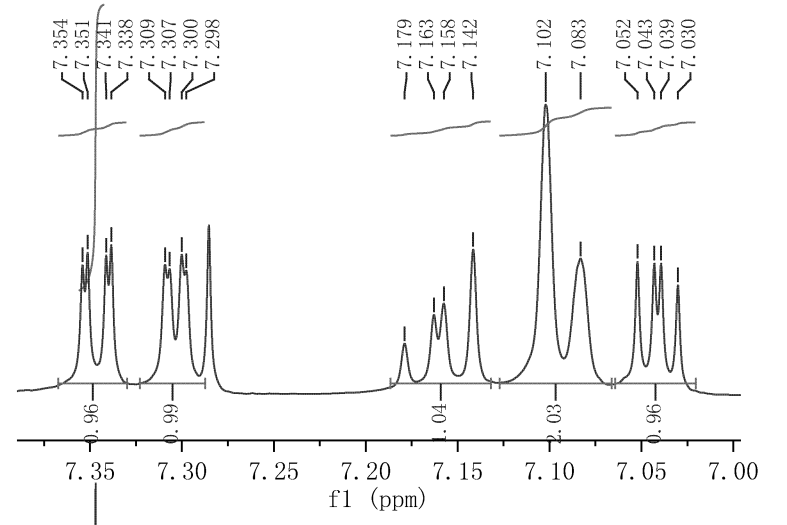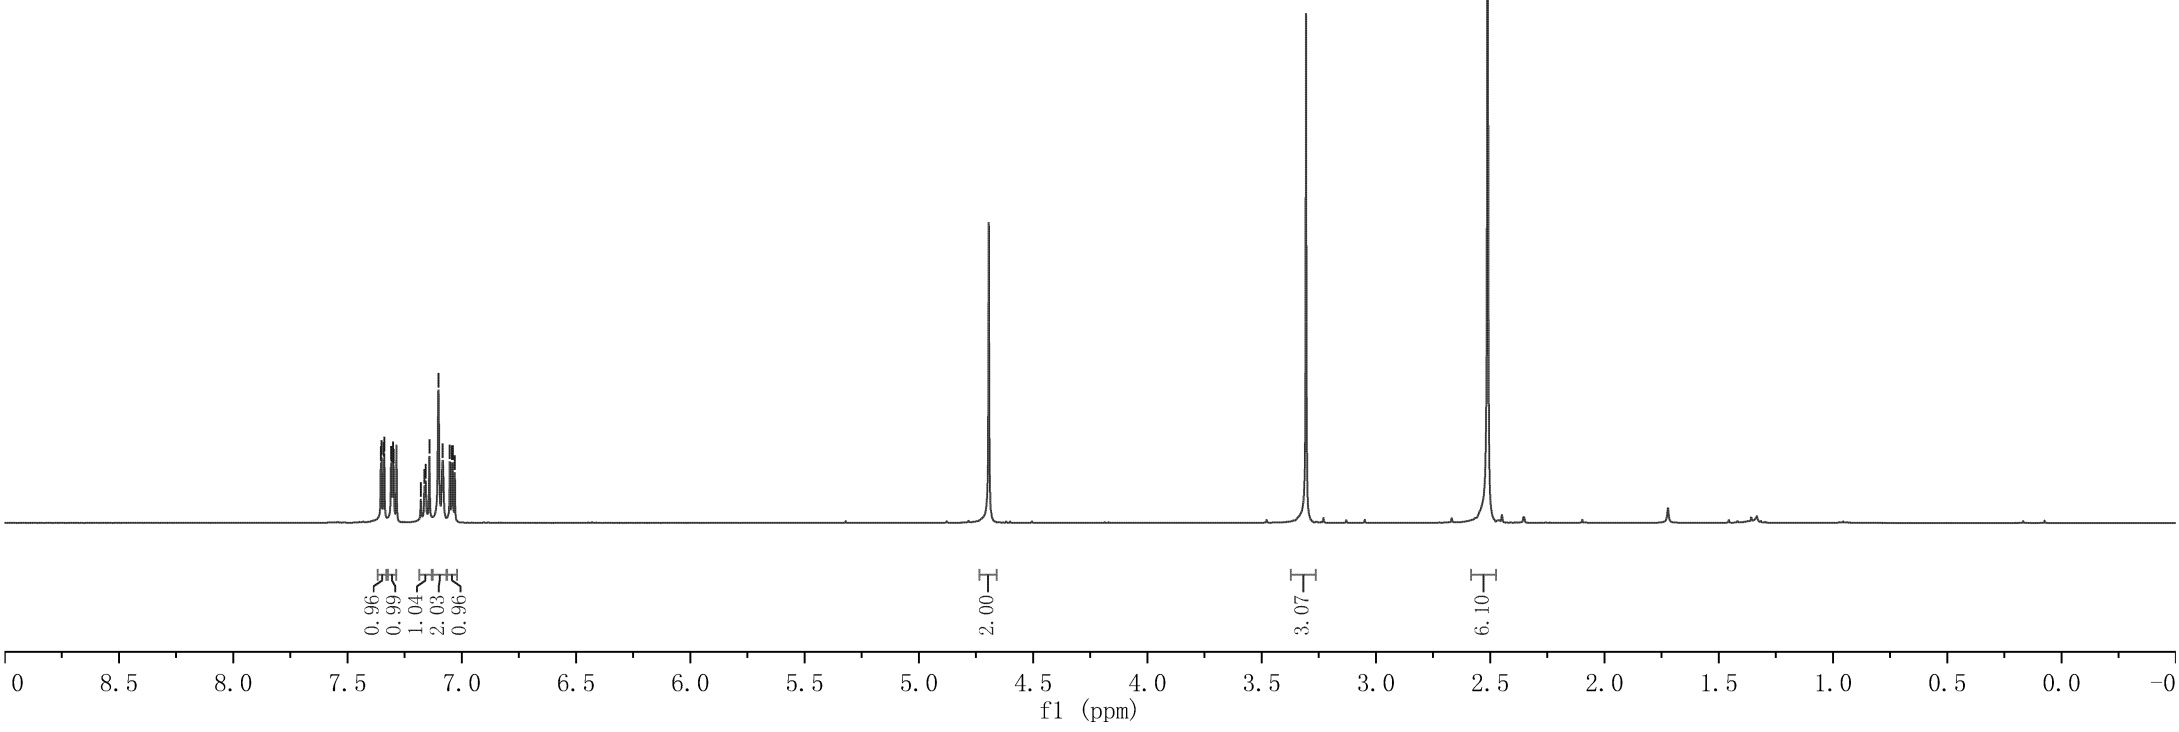

| Parameter                | Value               |
|--------------------------|---------------------|
| 1 Title                  | XHJ-2-62-C          |
| 2 Origin                 | Bruker BioSpin GmbH |
| 3 Solvent                | CDC13               |
| 4 Temperature            | 300.0               |
| 5 Number of Scans        | 11                  |
| 6 Acquisition Time       | 1.3631              |
| 7 Acquisition Date       | 2022-05-10T22:16:49 |
| 8 Spectrometer Frequency | 100.61              |
| 9 Spectral Width         | 24038.5             |

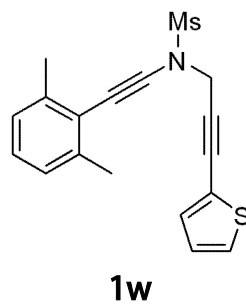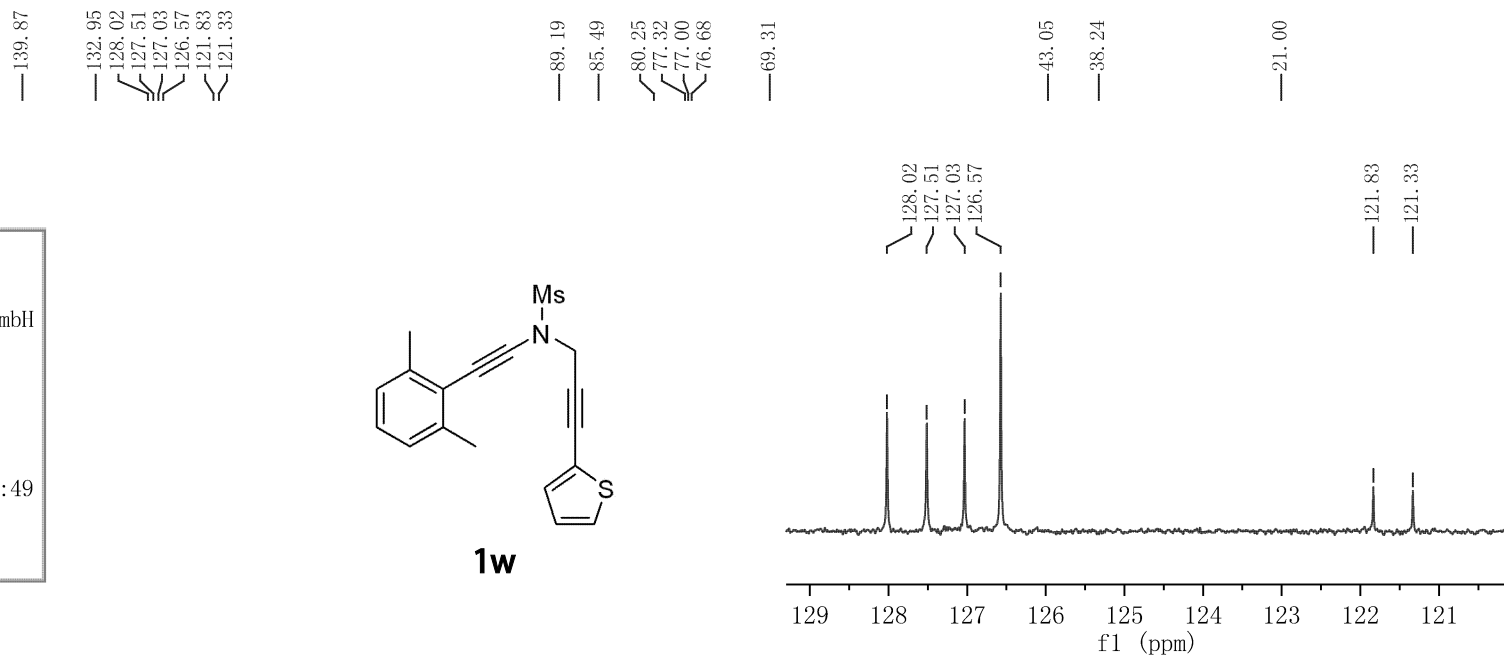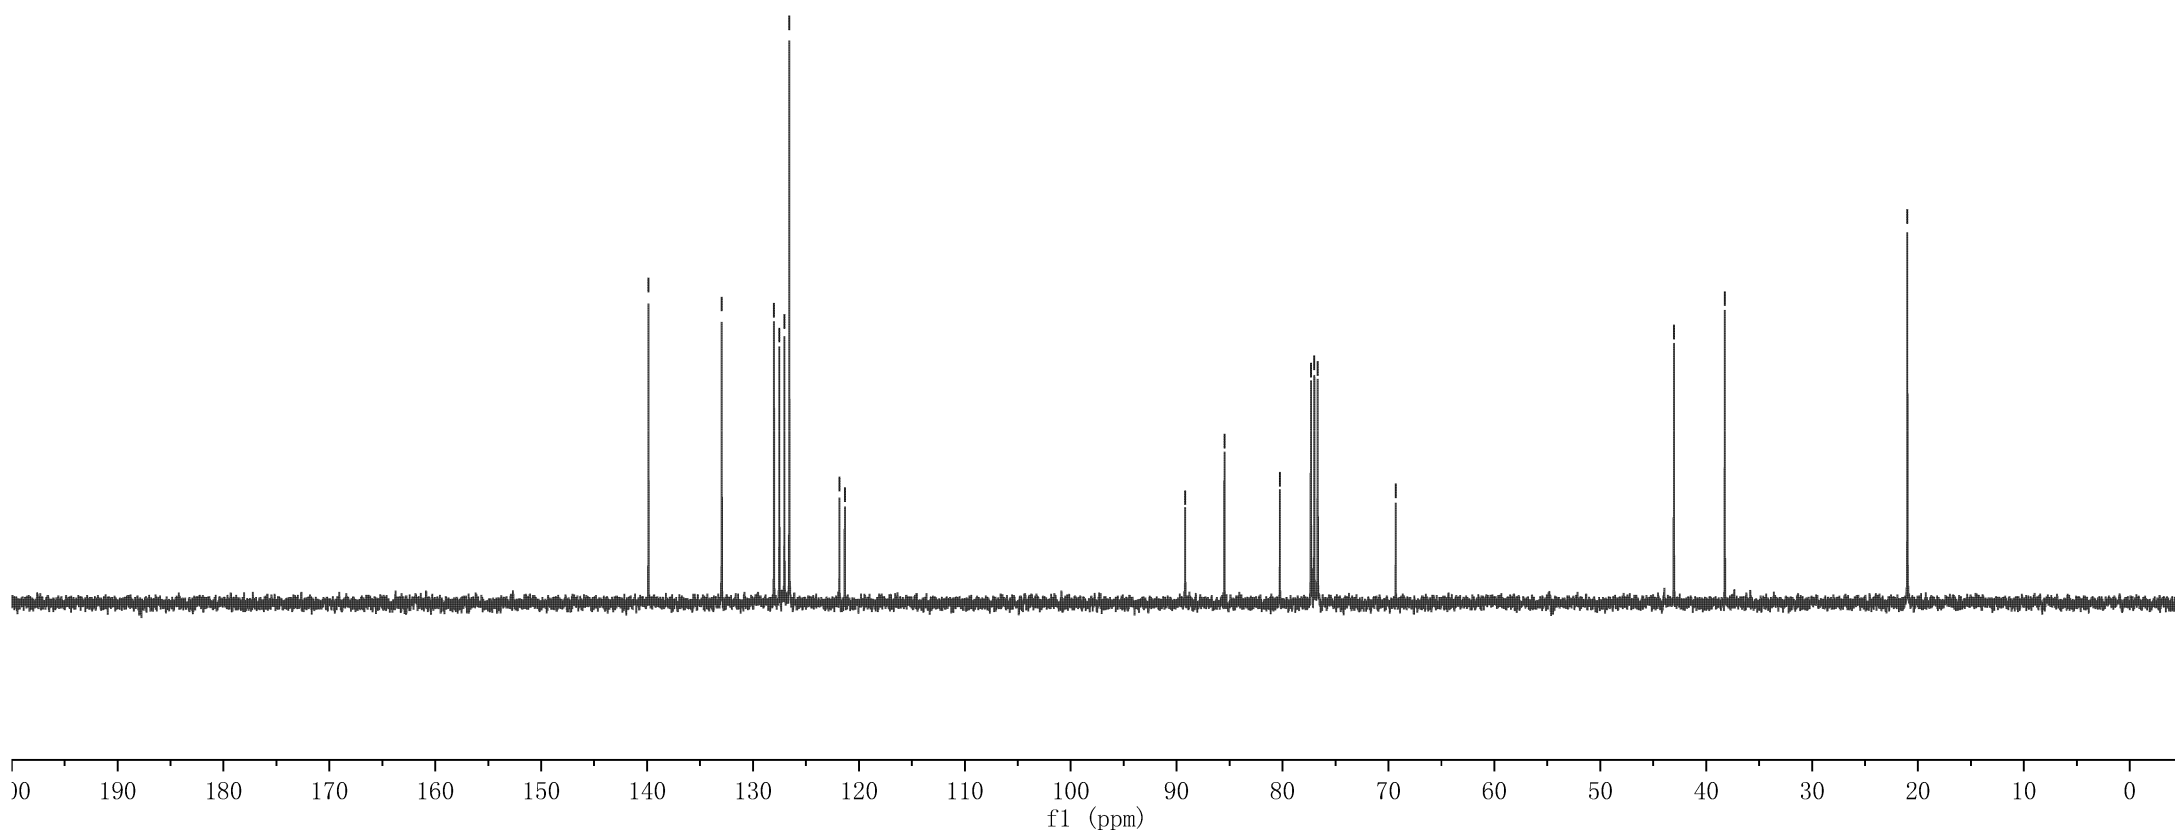

7.883  
7.861  
7.586  
7.565  
7.056  
7.044  
7.041  
7.023  
6.996  
6.974  
6.774  
6.752

4.583  
4.009  
3.992  
3.974  
3.957

2.362  
1.396  
1.379  
1.361

| Parameter                | Value               |
|--------------------------|---------------------|
| 1 Title                  | XHJ-2-128-H         |
| 2 Origin                 | Bruker BioSpin GmbH |
| 3 Solvent                | CDC13               |
| 4 Temperature            | 298.0               |
| 5 Number of Scans        | 10                  |
| 6 Acquisition Time       | 4.0894              |
| 7 Acquisition Date       | 2022-06-23T21:17:06 |
| 8 Spectrometer Frequency | 400.13              |
| 9 Spectral Width         | 8012.8              |

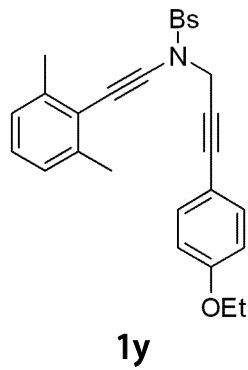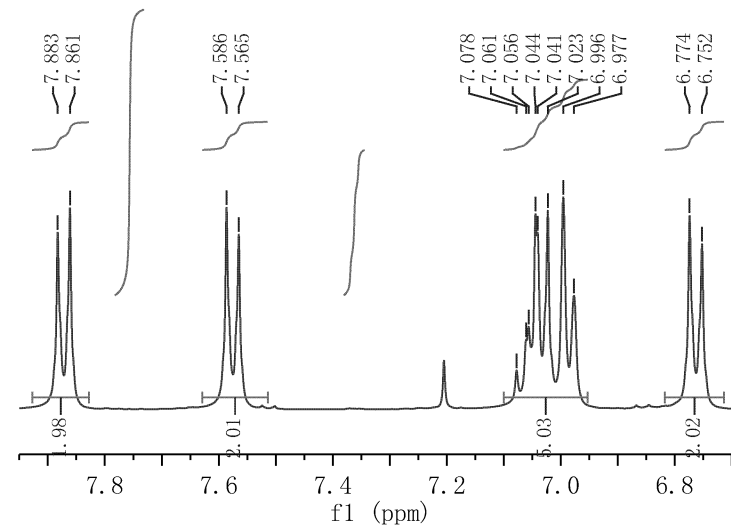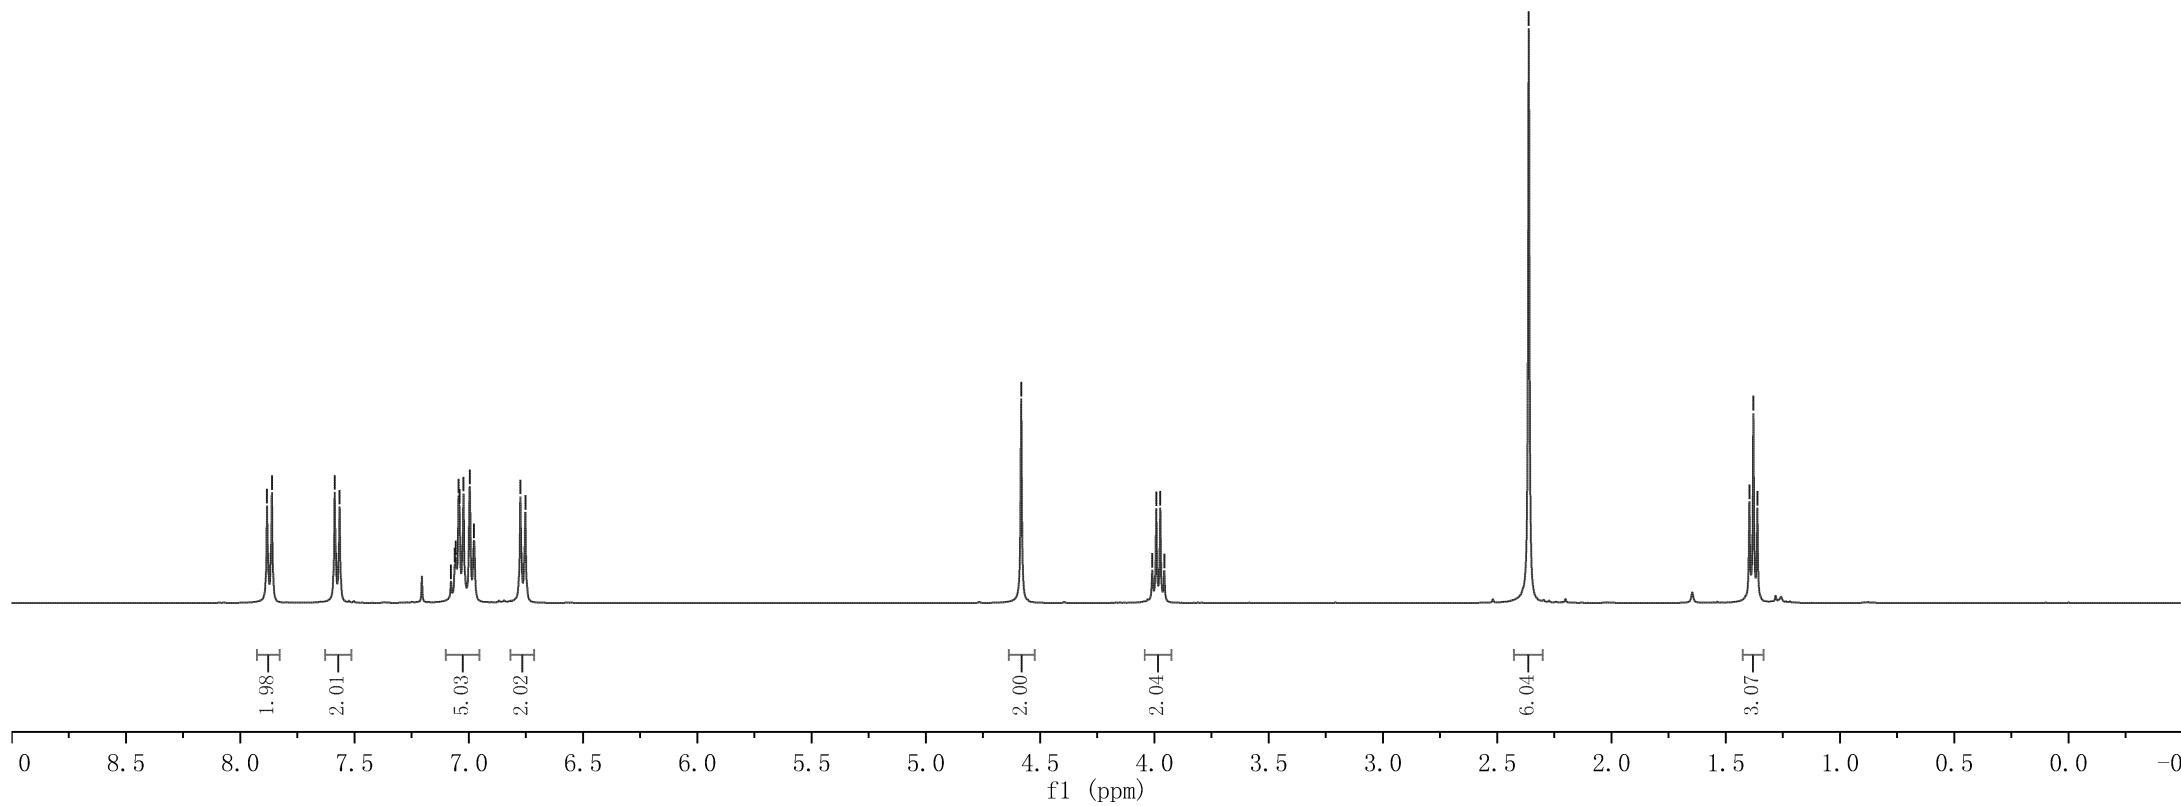

| Parameter                | Value               |
|--------------------------|---------------------|
| 1 Title                  | XHJ-2-128-C         |
| 2 Origin                 | Bruker BioSpin GmbH |
| 3 Solvent                | CDC13               |
| 4 Temperature            | 300.0               |
| 5 Number of Scans        | 20                  |
| 6 Acquisition Time       | 1.3631              |
| 7 Acquisition Date       | 2022-06-23T21:19:09 |
| 8 Spectrometer Frequency | 100.61              |
| 9 Spectral Width         | 24038.5             |

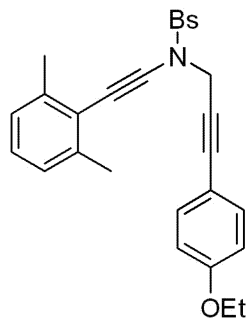

**1y**

159.22  
 139.97  
 136.27  
 132.99  
 132.12  
 129.55  
 128.99  
 127.44  
 126.54  
 121.97  
 114.36  
 113.37  
 89.46  
 86.82  
 79.35  
 77.32  
 77.00  
 76.68  
 69.01  
 63.40  
 43.28  
 20.97  
 14.60

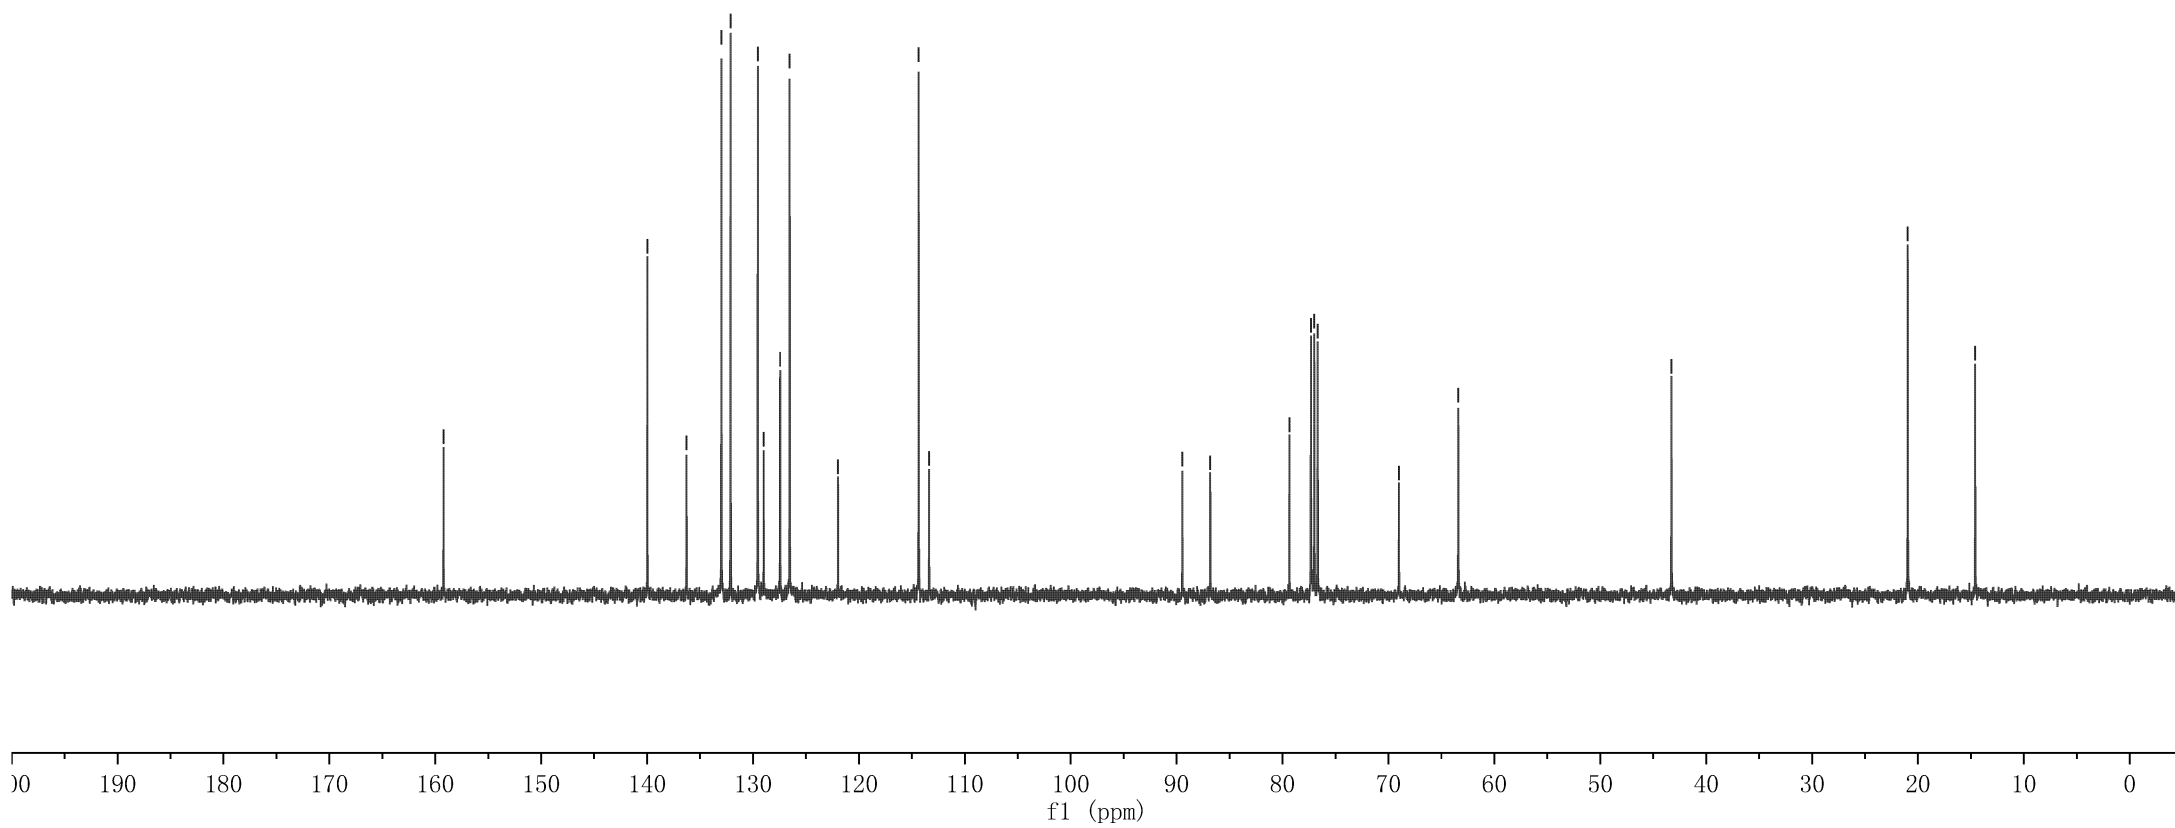

8.378  
8.358  
7.815  
7.793  
7.771  
7.679  
7.661  
7.489  
7.472  
7.443  
7.423  
7.405  
7.387  
7.368  
7.354  
7.333  
7.315

4.677

3.298

| Parameter                | Value               |
|--------------------------|---------------------|
| 1 Title                  | XHJ-3-116-H         |
| 2 Origin                 |                     |
| 3 Solvent                | CDC13               |
| 4 Temperature            | 298.8               |
| 5 Number of Scans        | 16                  |
| 6 Acquisition Time       | 4.0002              |
| 7 Acquisition Date       | 2022-10-29T11:58:41 |
| 8 Spectrometer Frequency | 399.90              |
| 9 Spectral Width         | 8012.0              |

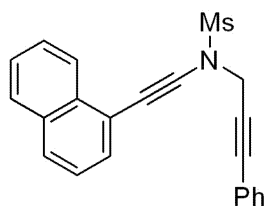

**1aa**

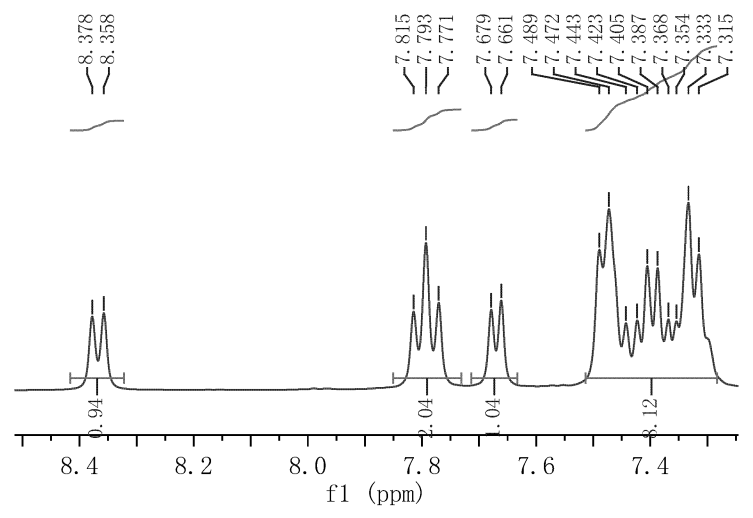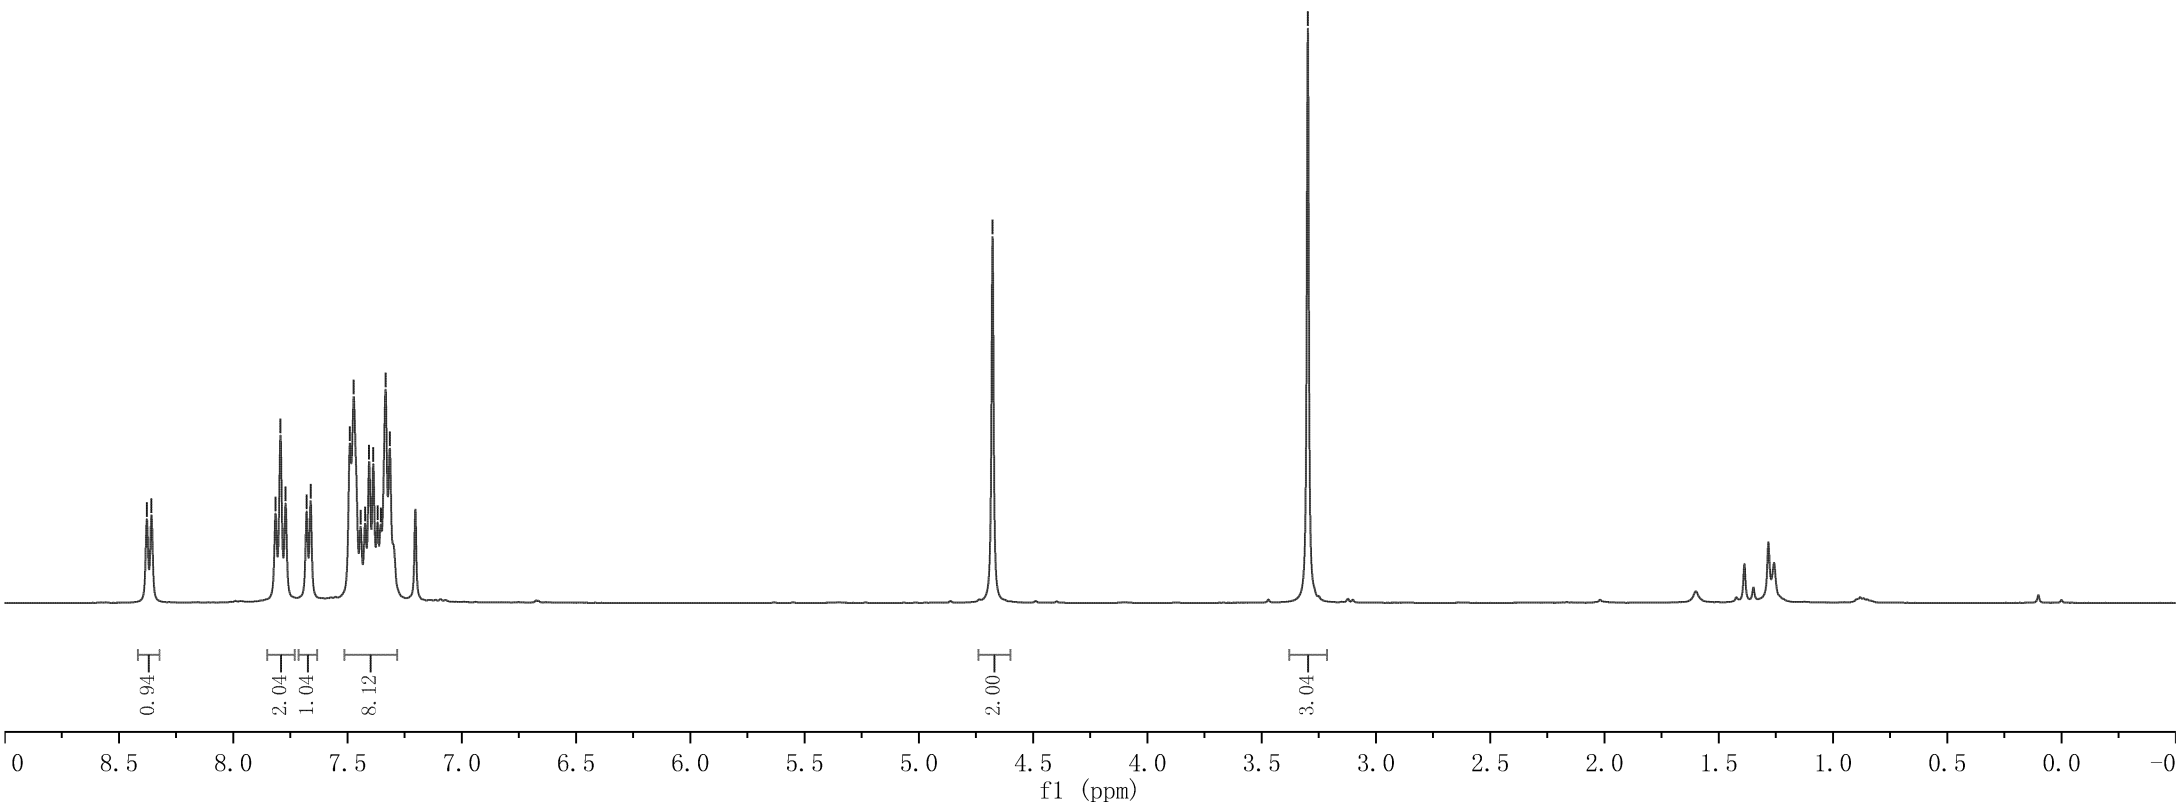



| Parameter                | Value               |
|--------------------------|---------------------|
| 1 Title                  | XHJ-3-116-H         |
| 2 Origin                 |                     |
| 3 Solvent                | CDC13               |
| 4 Temperature            | 298.4               |
| 5 Number of Scans        | 500                 |
| 6 Acquisition Time       | 1.0000              |
| 7 Acquisition Date       | 2022-10-29T12:18:14 |
| 8 Spectrometer Frequency | 100.56              |
| 9 Spectral Width         | 26041.0             |

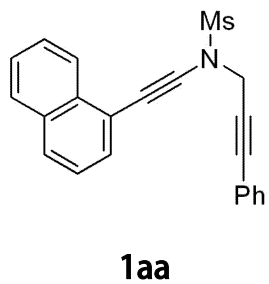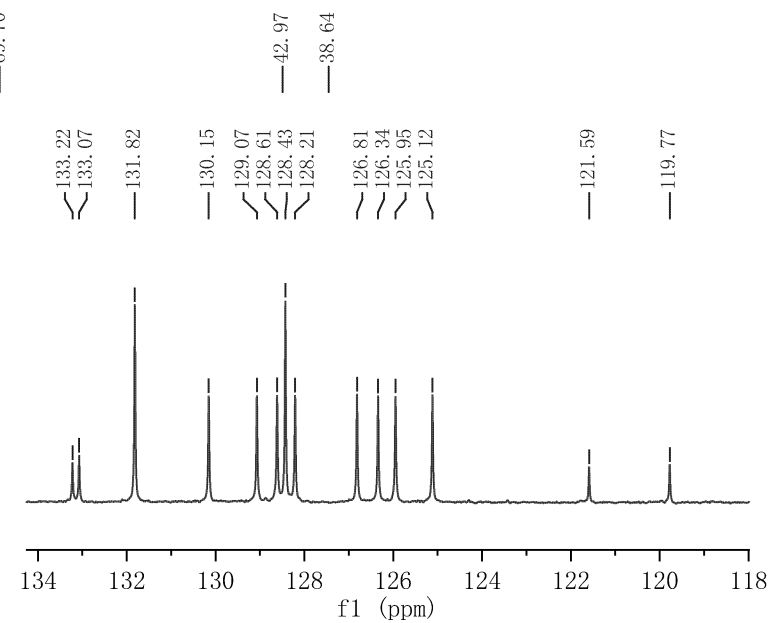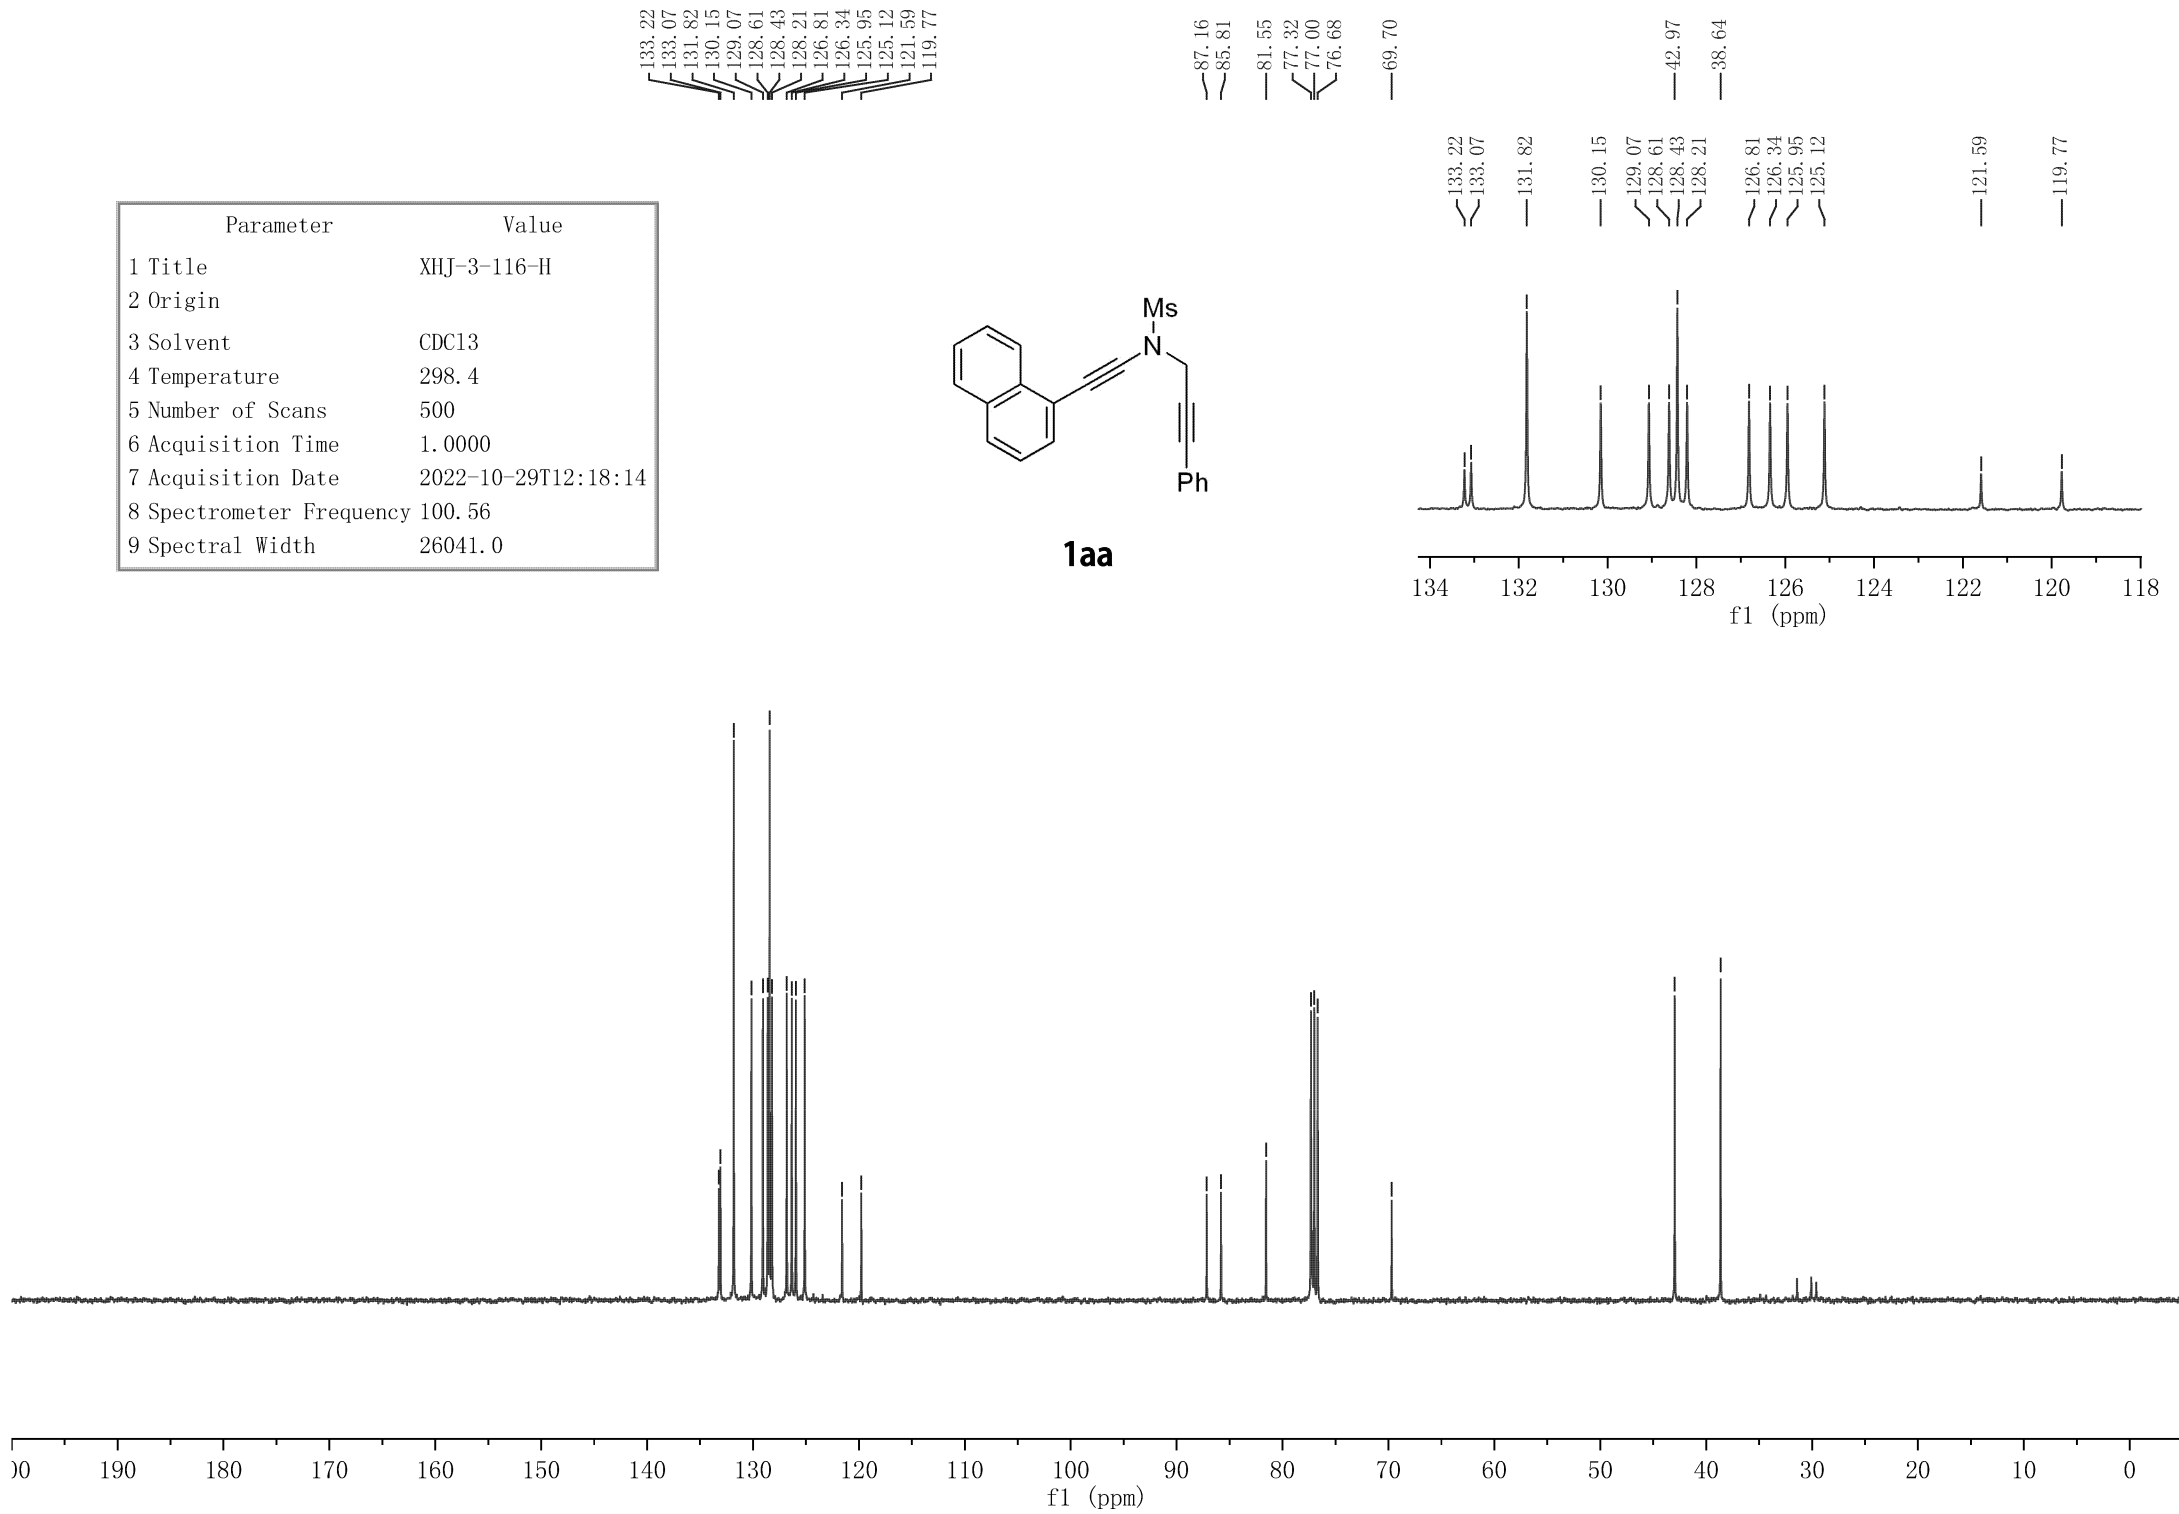

| Parameter                | Value               |
|--------------------------|---------------------|
| 1 Title                  | XHJ-3-121/H         |
| 2 Origin                 | Bruker BioSpin GmbH |
| 3 Solvent                | CDCl <sub>3</sub>   |
| 4 Temperature            | 298.0               |
| 5 Number of Scans        | 8                   |
| 6 Acquisition Time       | 4.0894              |
| 7 Acquisition Date       | 2022-10-30T18:09:35 |
| 8 Spectrometer Frequency | 400.13              |
| 9 Spectral Width         | 8012.8              |

7.460  
7.445  
7.441  
7.365  
7.350  
7.335  
7.316  
7.302  
7.270  
7.251  
7.236  
7.231  
7.219  
7.138  
7.115  
7.004  
6.982  
6.970  
6.964

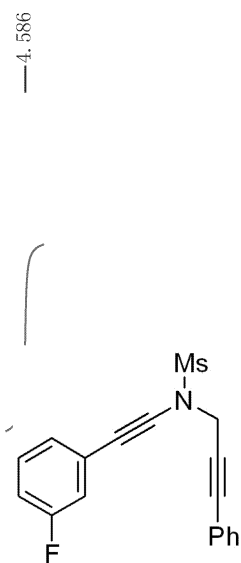

4.586

3.253

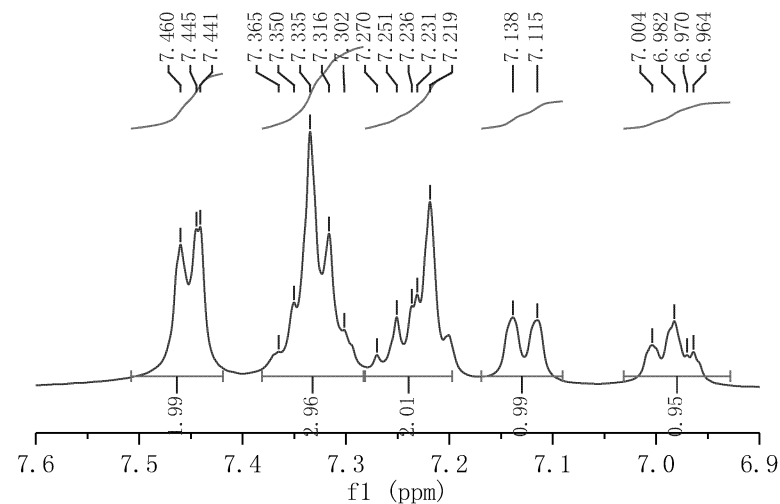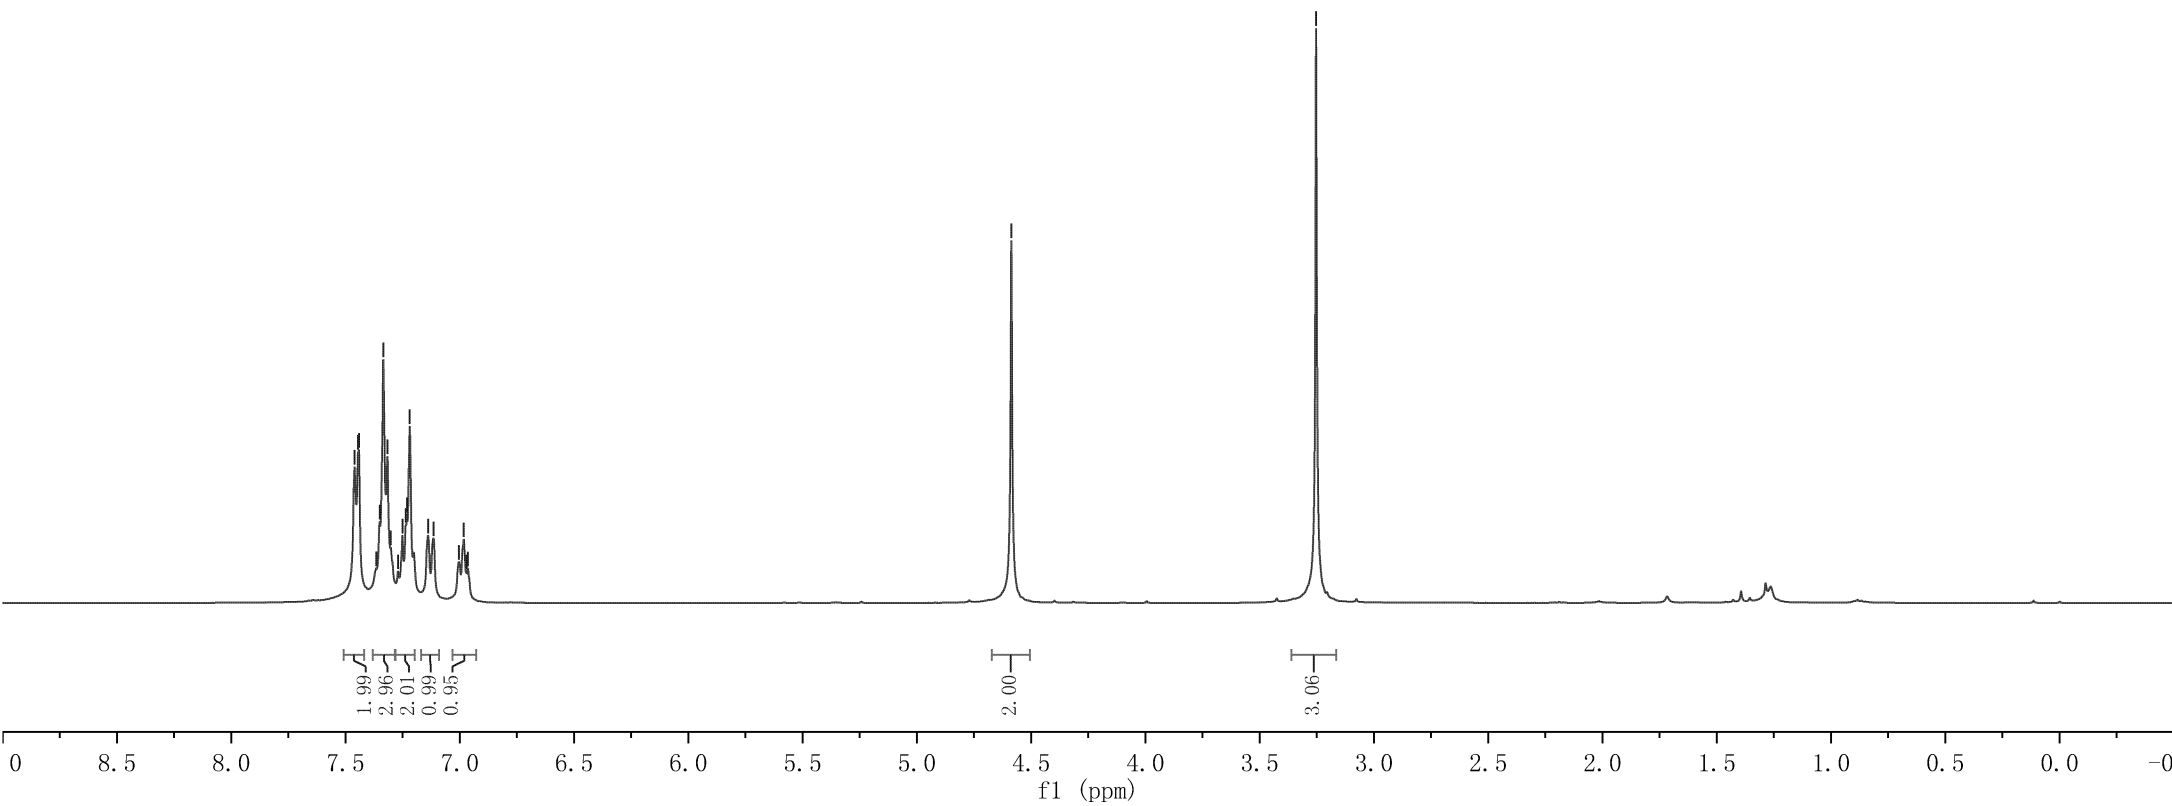

| Parameter                | Value               |
|--------------------------|---------------------|
| 1 Title                  | XHJ-3-121-C-1       |
| 2 Origin                 | Bruker BioSpin GmbH |
| 3 Solvent                | CDC13               |
| 4 Temperature            | 300.0               |
| 5 Number of Scans        | 26                  |
| 6 Acquisition Time       | 1.3631              |
| 7 Acquisition Date       | 2022-10-30T18:12:06 |
| 8 Spectrometer Frequency | 100.61              |
| 9 Spectral Width         | 24038.5             |

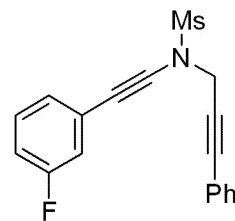

**1ab**

163.38  
160.93

131.67  
129.84  
129.75  
128.99  
128.36  
127.25  
127.22  
124.06  
123.96  
121.47  
118.18  
117.95  
115.39  
115.18

86.99  
82.15  
81.22  
77.32  
77.00  
76.68  
70.25  
70.21

131.67  
129.84  
129.75  
128.99  
128.36  
127.25  
127.22  
124.06  
123.96  
121.47  
118.18  
117.95  
115.39  
115.18

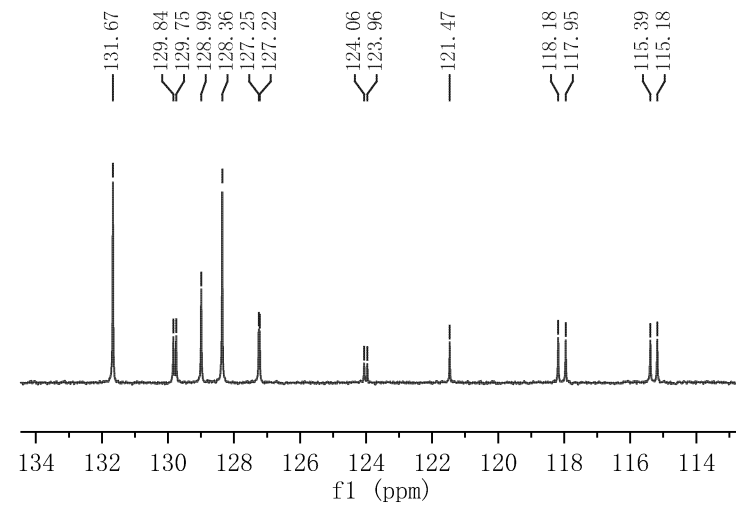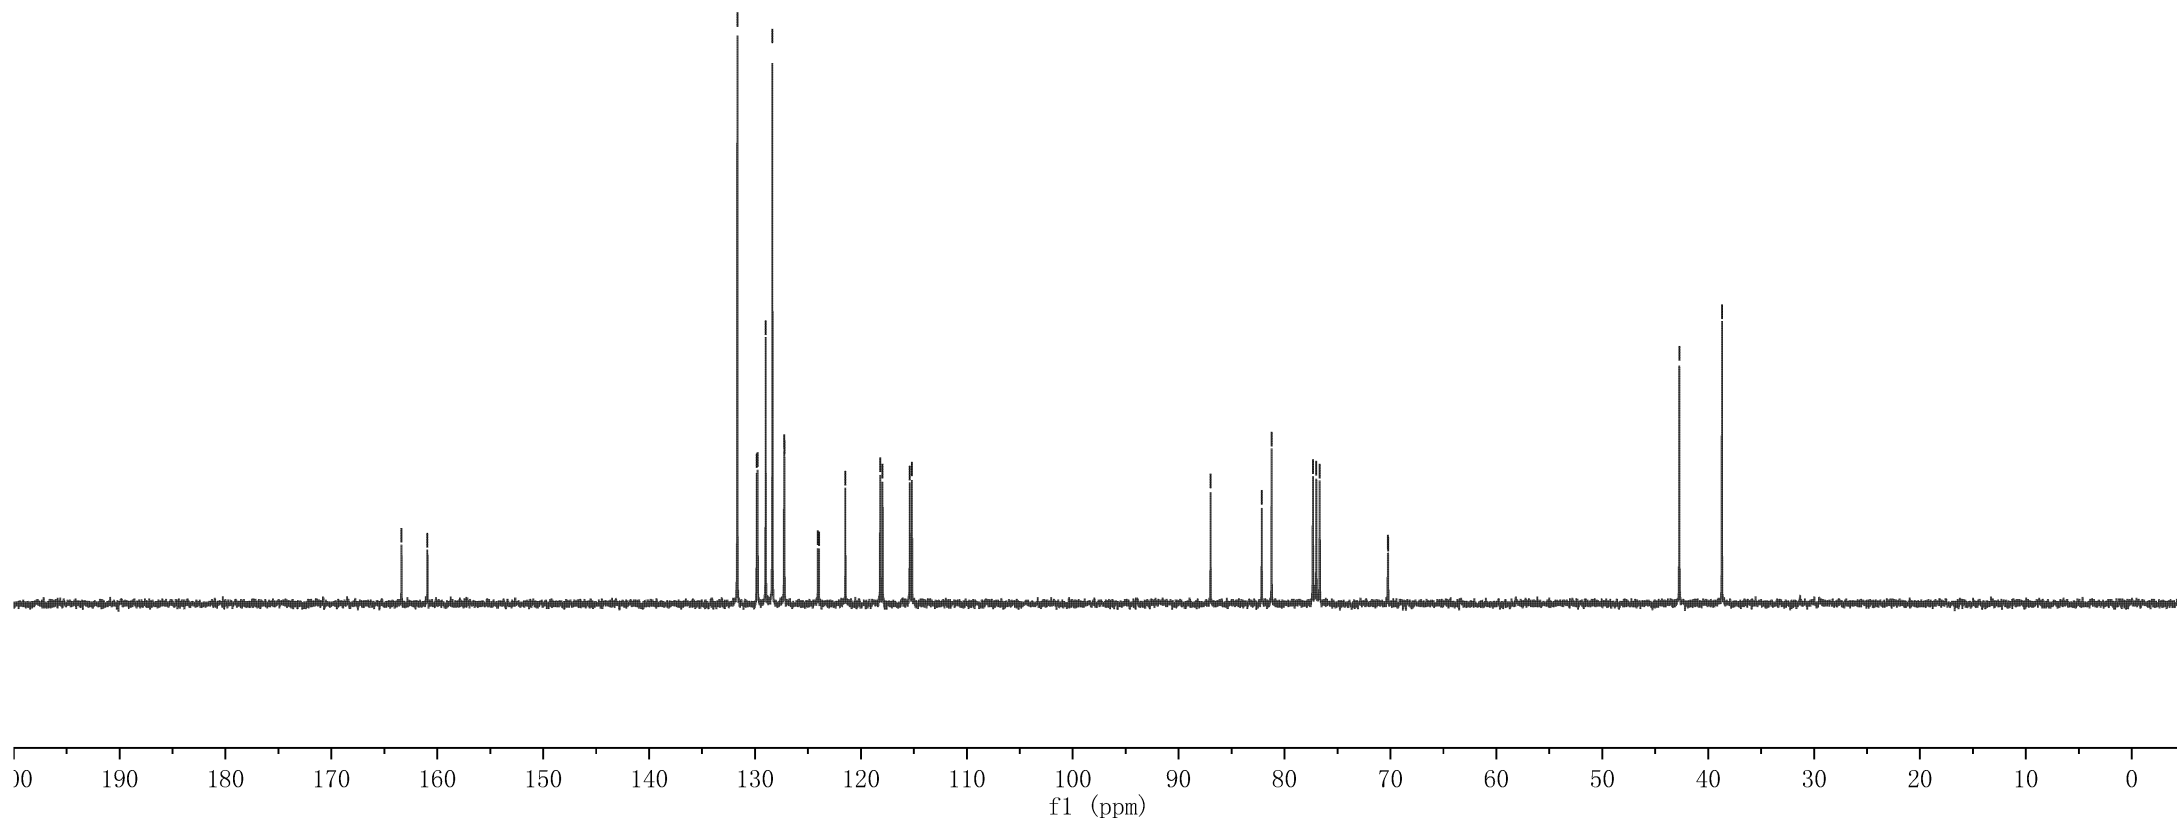

| Parameter                | Value               |
|--------------------------|---------------------|
| 1 Title                  | xhj-3-121-f         |
| 2 Origin                 | Bruker BioSpin GmbH |
| 3 Solvent                | CDCl3               |
| 4 Temperature            | 296.3               |
| 5 Number of Scans        | 16                  |
| 6 Acquisition Time       | 0.7340              |
| 7 Acquisition Date       | 2022-11-02T21:50:19 |
| 8 Spectrometer Frequency | 376.31              |
| 9 Spectral Width         | 89285.7             |

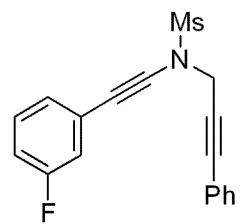

**1ab**

—112.78

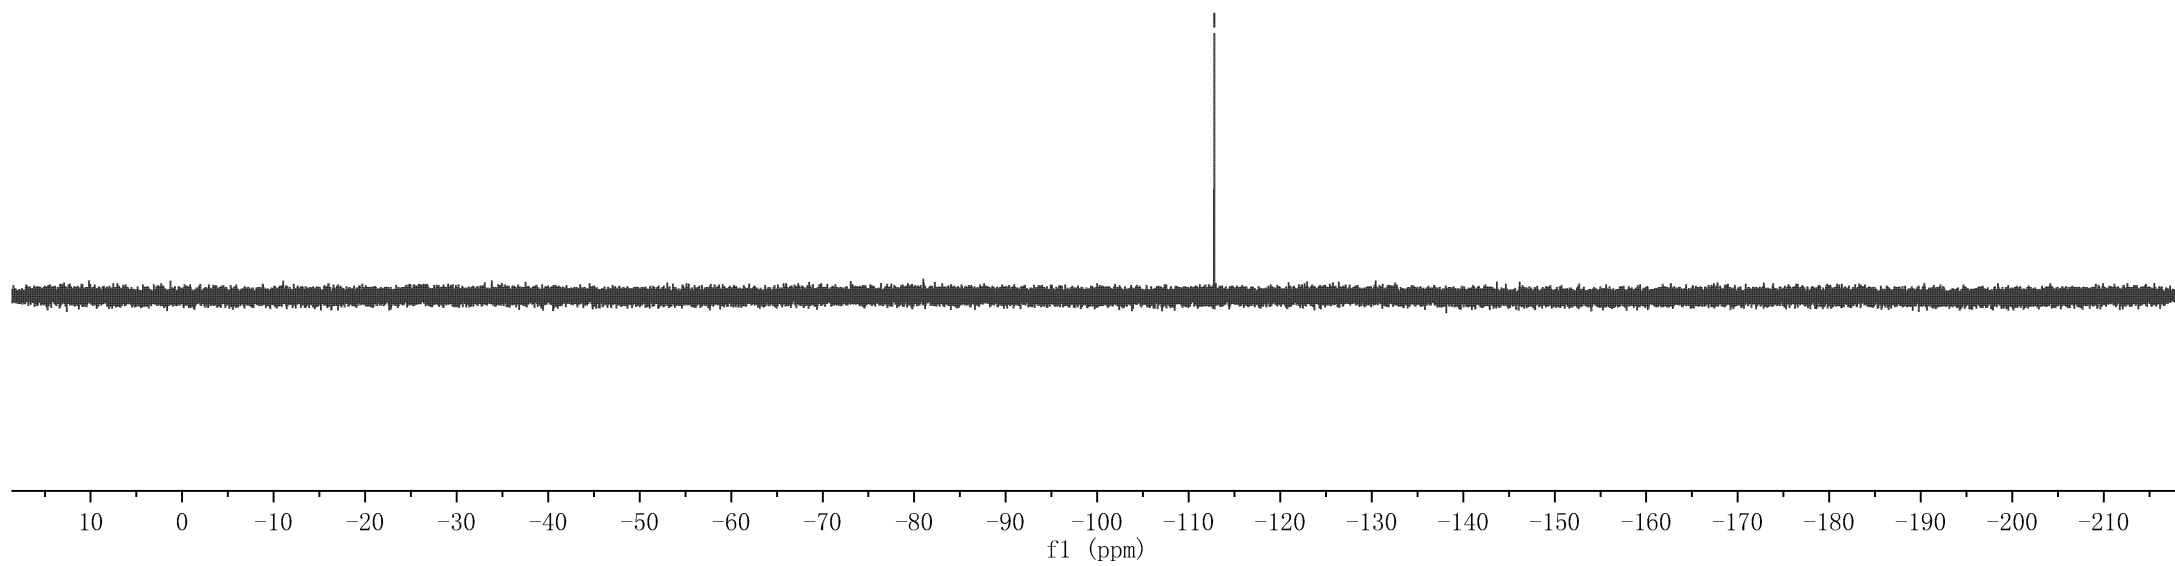

7.585  
7.581  
7.577  
7.462  
7.447  
7.442  
7.414  
7.412  
7.394  
7.392  
7.360  
7.357  
7.340  
7.321  
7.306  
7.299  
7.165  
7.145  
7.125

| Parameter                | Value               |
|--------------------------|---------------------|
| 1 Title                  | XHJ-3-122-H         |
| 2 Origin                 | Bruker BioSpin GmbH |
| 3 Solvent                | CDC13               |
| 4 Temperature            | 298.0               |
| 5 Number of Scans        | 13                  |
| 6 Acquisition Time       | 4.0894              |
| 7 Acquisition Date       | 2022-10-30T18:16:10 |
| 8 Spectrometer Frequency | 400.13              |
| 9 Spectral Width         | 8012.8              |

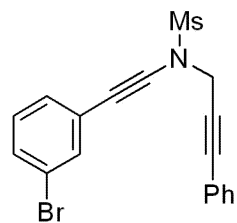

**1ac**

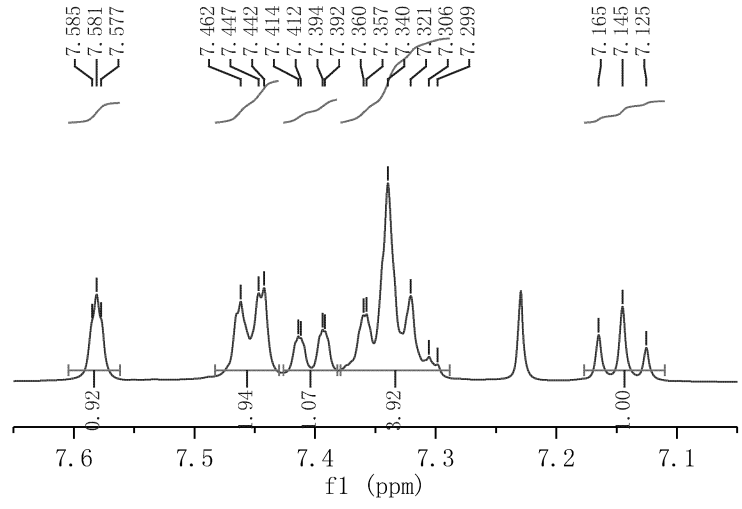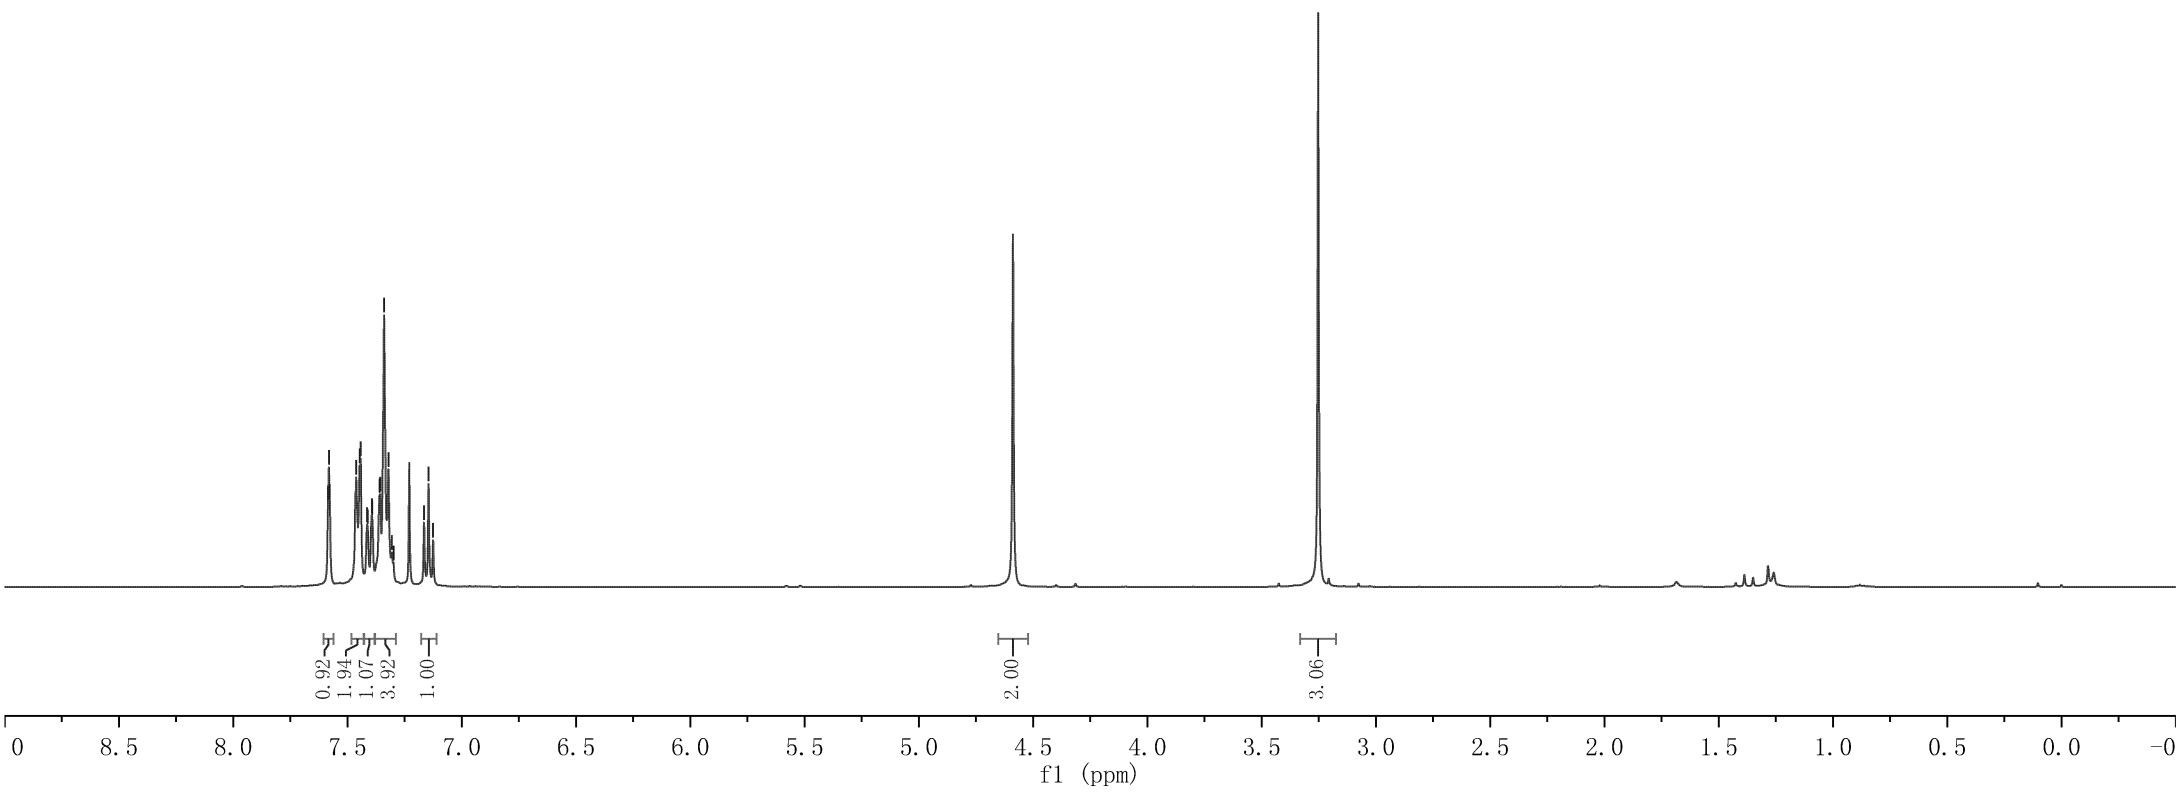

| Parameter                | Value               |
|--------------------------|---------------------|
| 1 Title                  | XHJ-3-122-C         |
| 2 Origin                 | Bruker BioSpin GmbH |
| 3 Solvent                | CDC13               |
| 4 Temperature            | 300.0               |
| 5 Number of Scans        | 31                  |
| 6 Acquisition Time       | 1.3631              |
| 7 Acquisition Date       | 2022-10-30T18:18:30 |
| 8 Spectrometer Frequency | 100.61              |
| 9 Spectral Width         | 24038.5             |

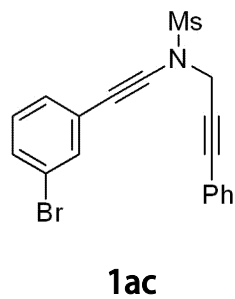

134.00  
131.69  
131.09  
129.86  
129.65  
129.01  
128.37  
124.18  
121.94  
121.44

87.05  
82.52  
81.20  
77.32  
77.00  
76.68  
69.98

42.77  
38.77

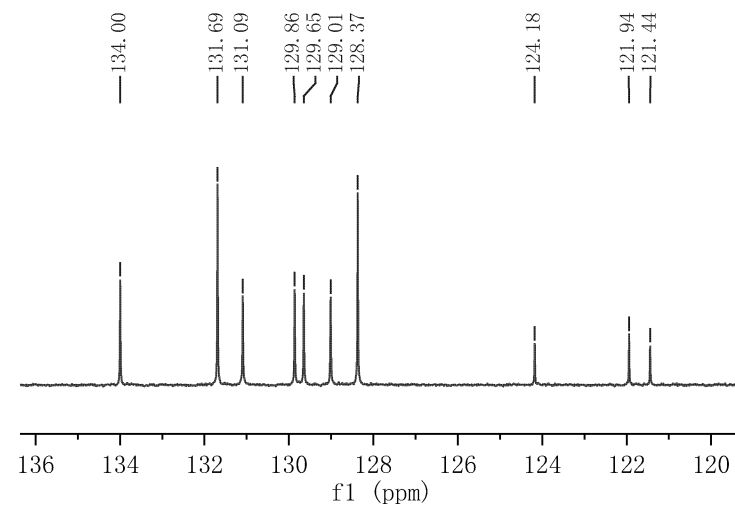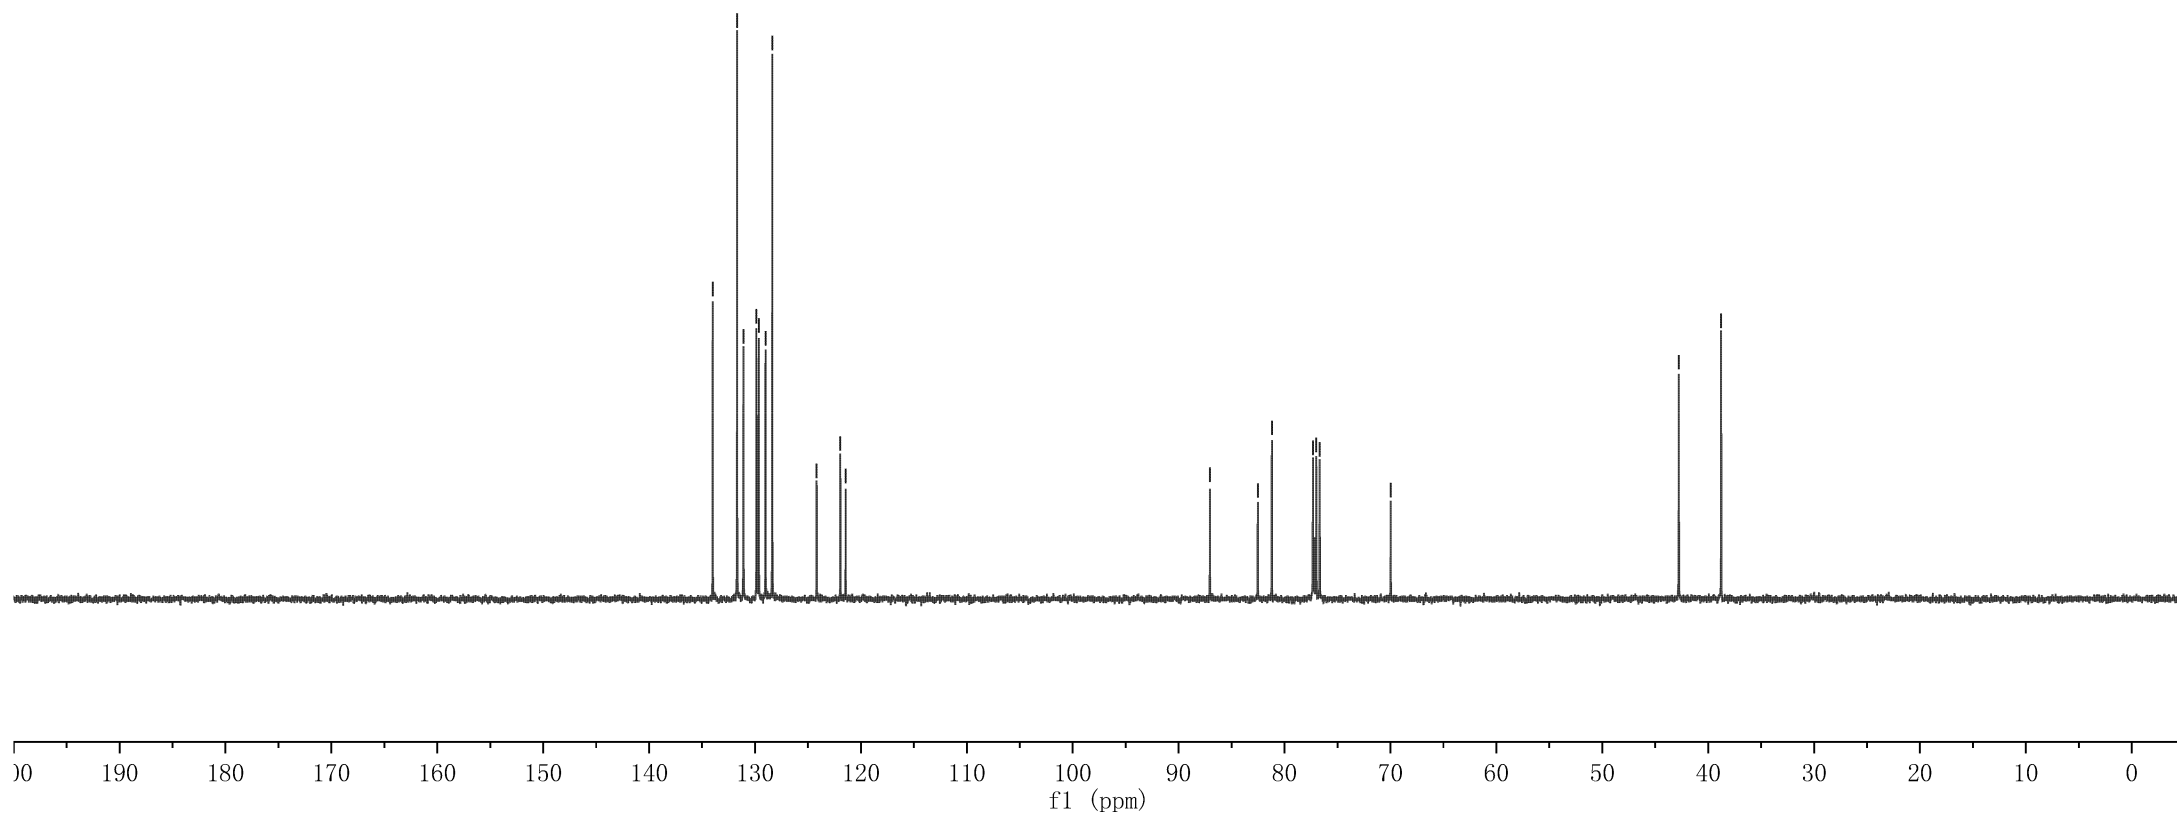

7.439  
7.435  
7.420  
7.415  
7.358  
7.354  
7.340  
7.321  
7.302  
7.287  
7.280  
7.097  
7.081  
7.076  
7.060  
7.021  
7.002

| Parameter                | Value               |
|--------------------------|---------------------|
| 1 Title                  | lct-10-93-H         |
| 2 Origin                 | Bruker BioSpin GmbH |
| 3 Solvent                | CDC13               |
| 4 Temperature            | 298.0               |
| 5 Number of Scans        | 7                   |
| 6 Acquisition Time       | 4.0894              |
| 7 Acquisition Date       | 2022-11-01T15:40:05 |
| 8 Spectrometer Frequency | 400.13              |
| 9 Spectral Width         | 8012.8              |

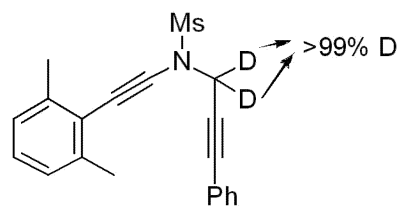

**[D2]-1a**

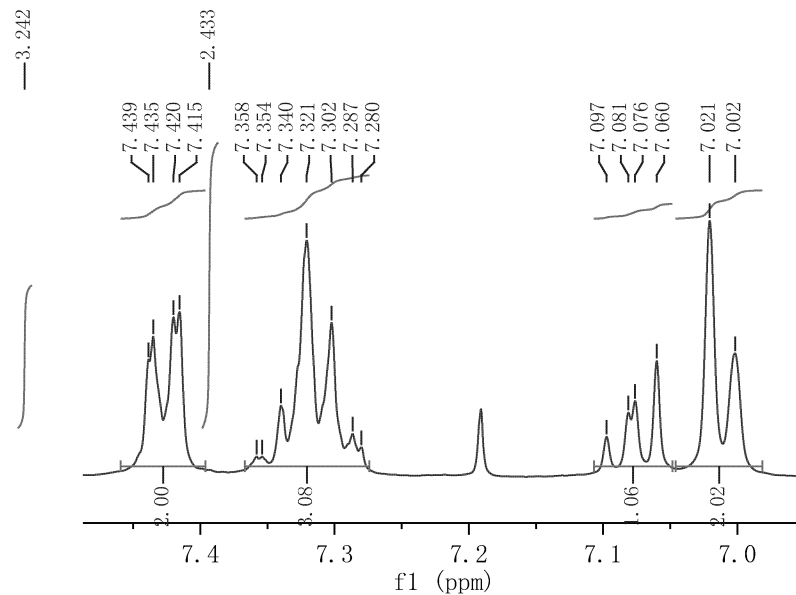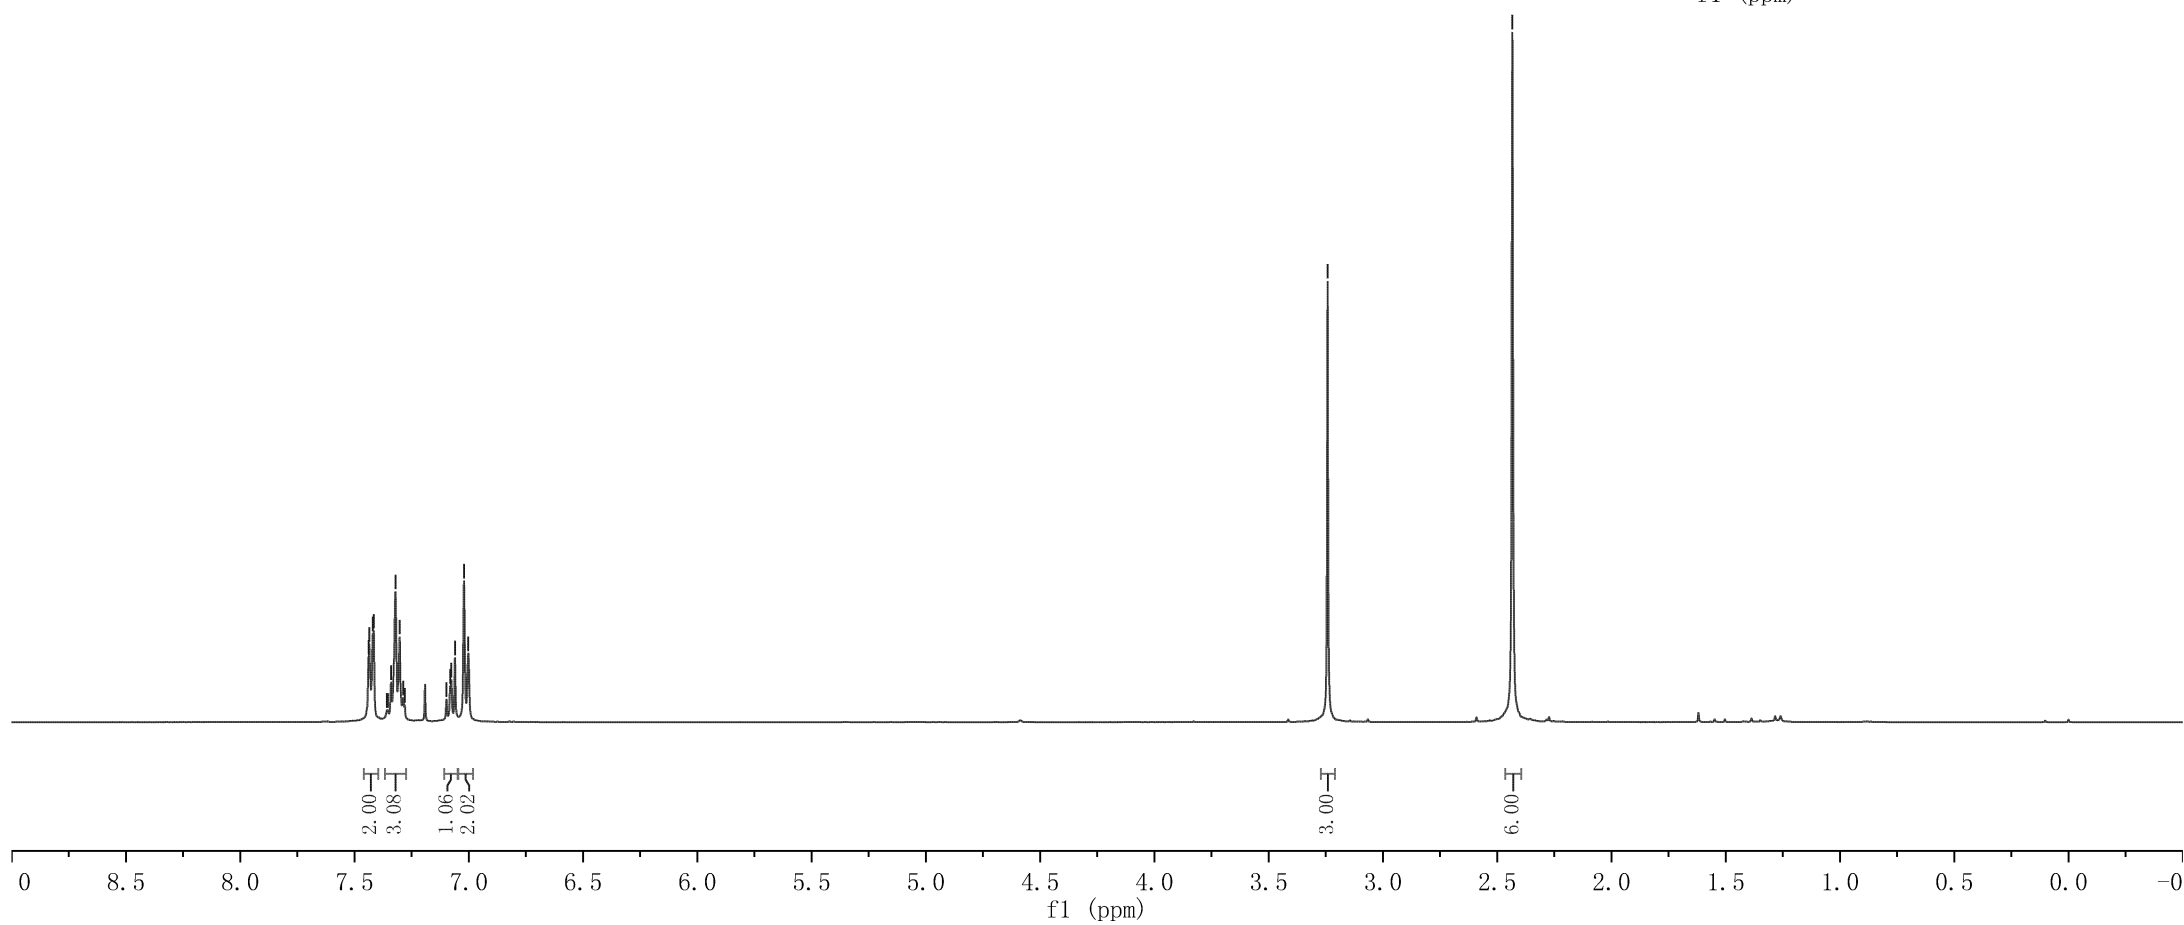

| Parameter                | Value               |
|--------------------------|---------------------|
| 1 Title                  | lct-10-93-C         |
| 2 Origin                 | Bruker BioSpin GmbH |
| 3 Solvent                | CDC13               |
| 4 Temperature            | 300.0               |
| 5 Number of Scans        | 20                  |
| 6 Acquisition Time       | 1.3631              |
| 7 Acquisition Date       | 2022-11-01T15:41:28 |
| 8 Spectrometer Frequency | 100.61              |
| 9 Spectral Width         | 24038.5             |

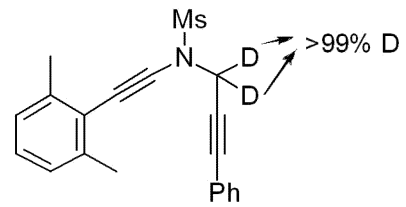

**[D2]-1a**

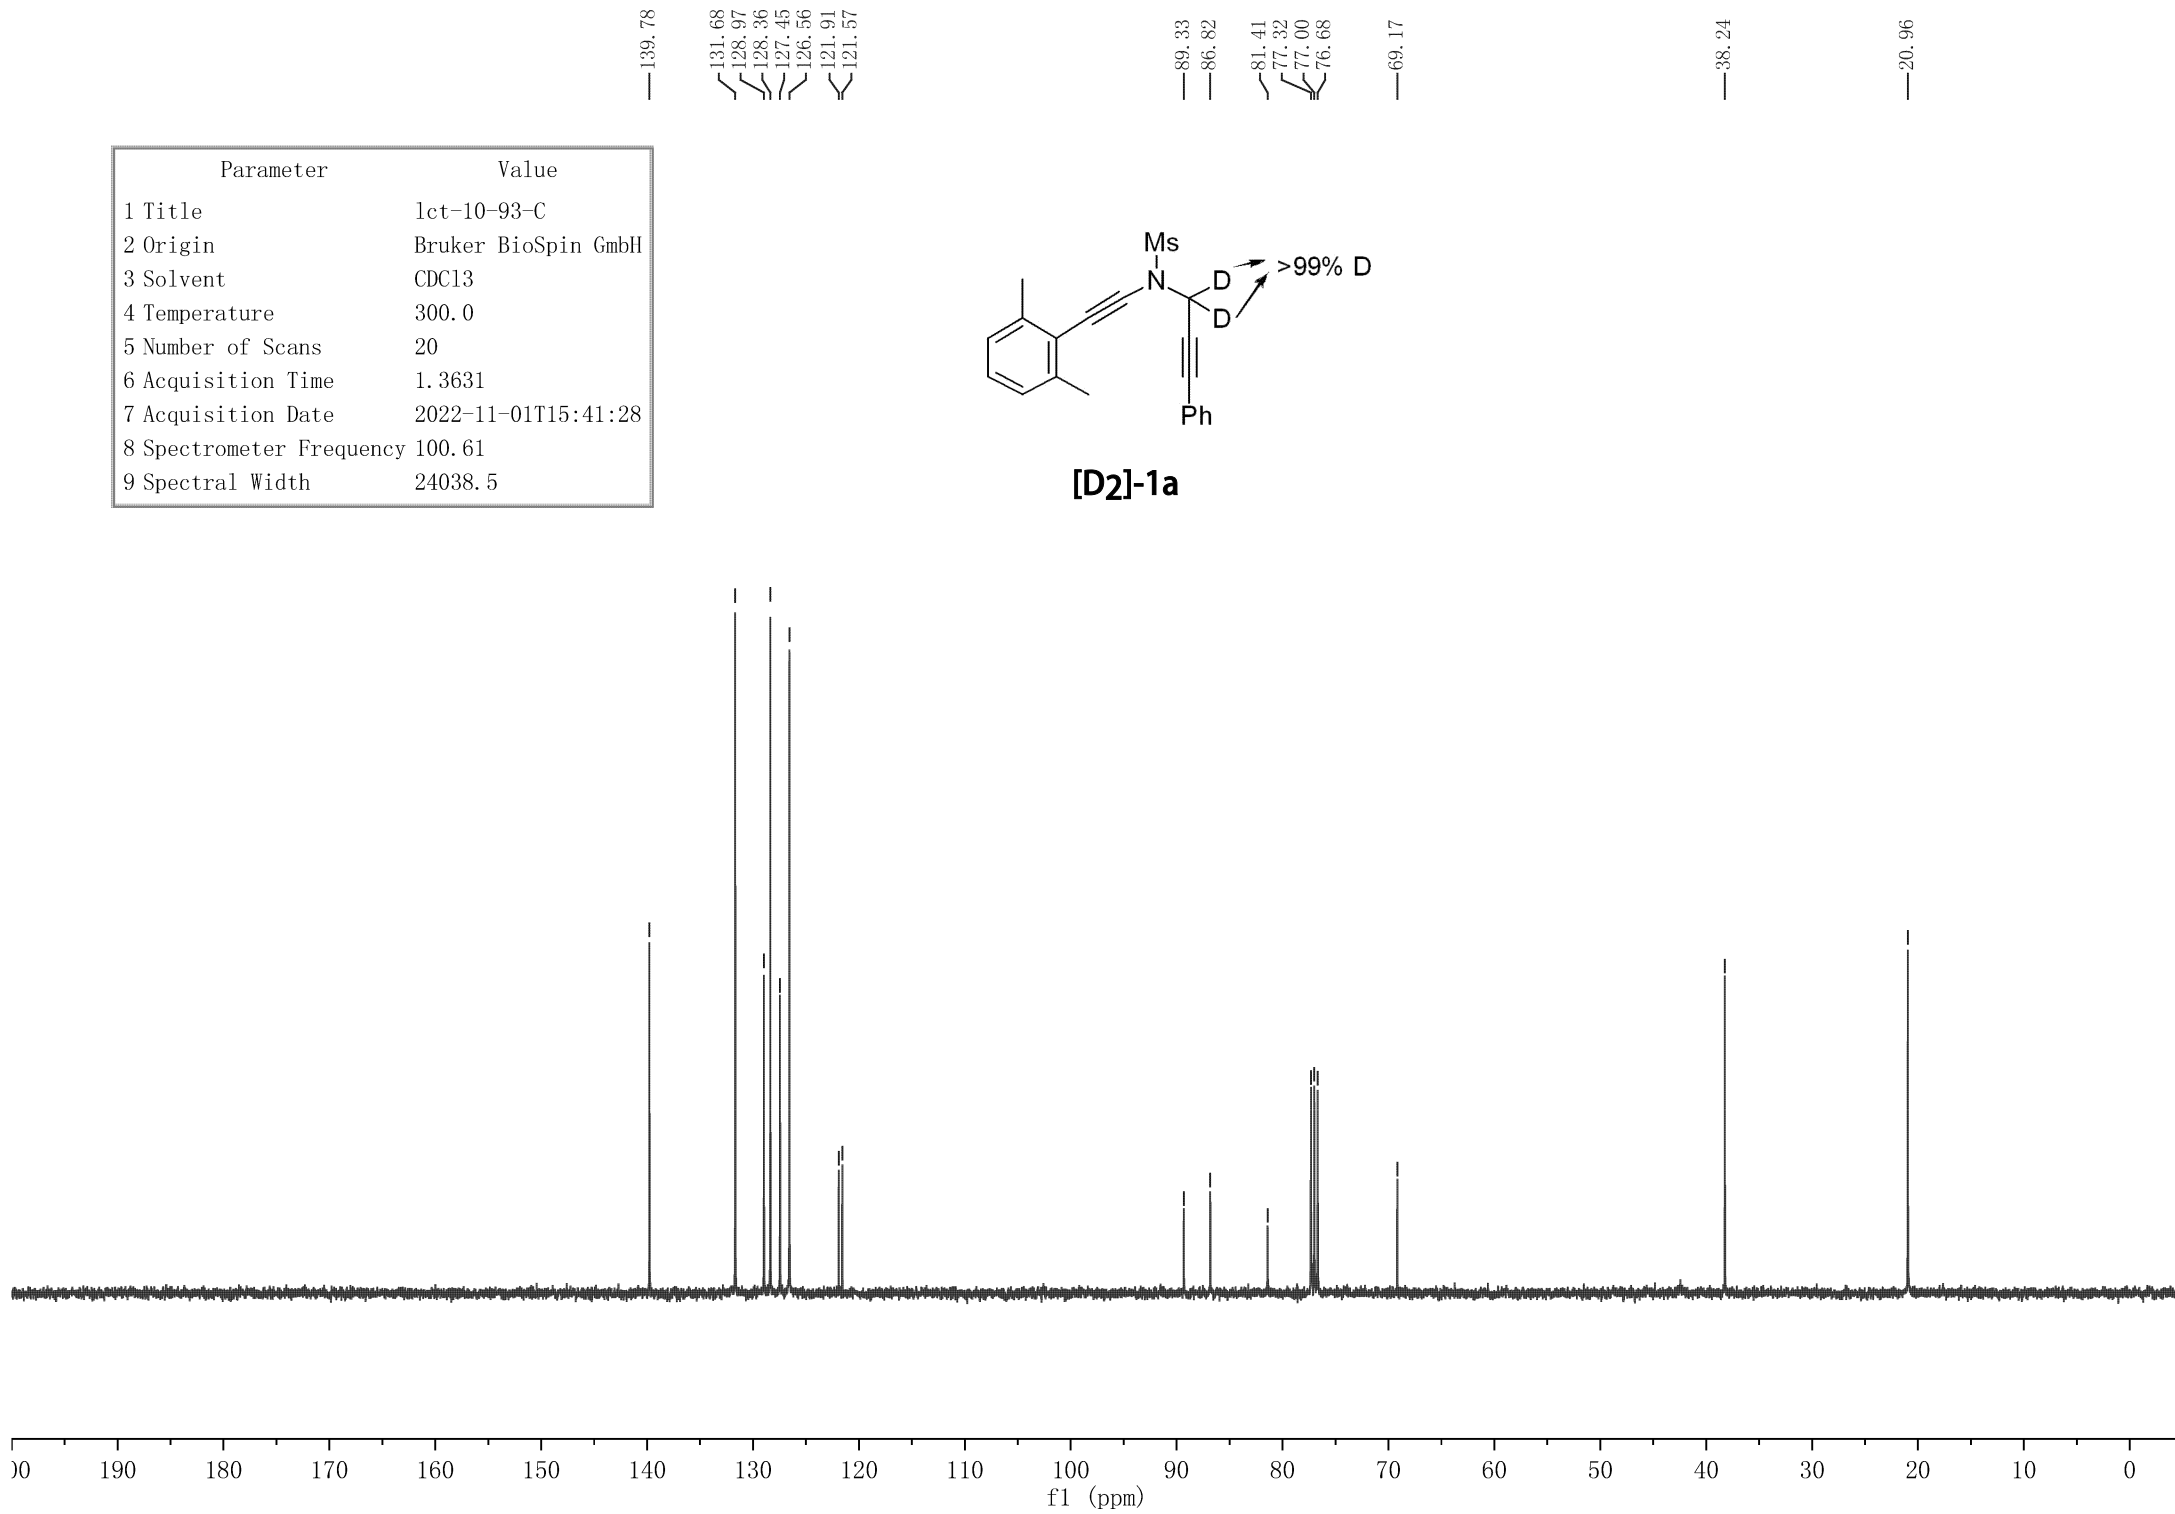



| Parameter                | Value               |
|--------------------------|---------------------|
| 1 Title                  | XHJ-2-DIKETONE-2-H  |
| 2 Origin                 | Bruker BioSpin GmbH |
| 3 Solvent                | CDCl3               |
| 4 Temperature            | 298.0               |
| 5 Number of Scans        | 20                  |
| 6 Acquisition Time       | 4.0894              |
| 7 Acquisition Date       | 2022-08-16T15:58:13 |
| 8 Spectrometer Frequency | 400.13              |
| 9 Spectral Width         | 8012.8              |

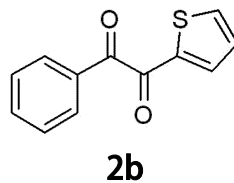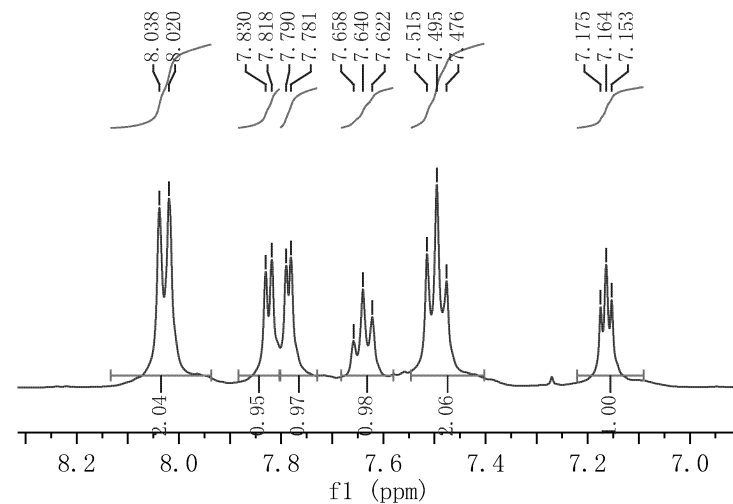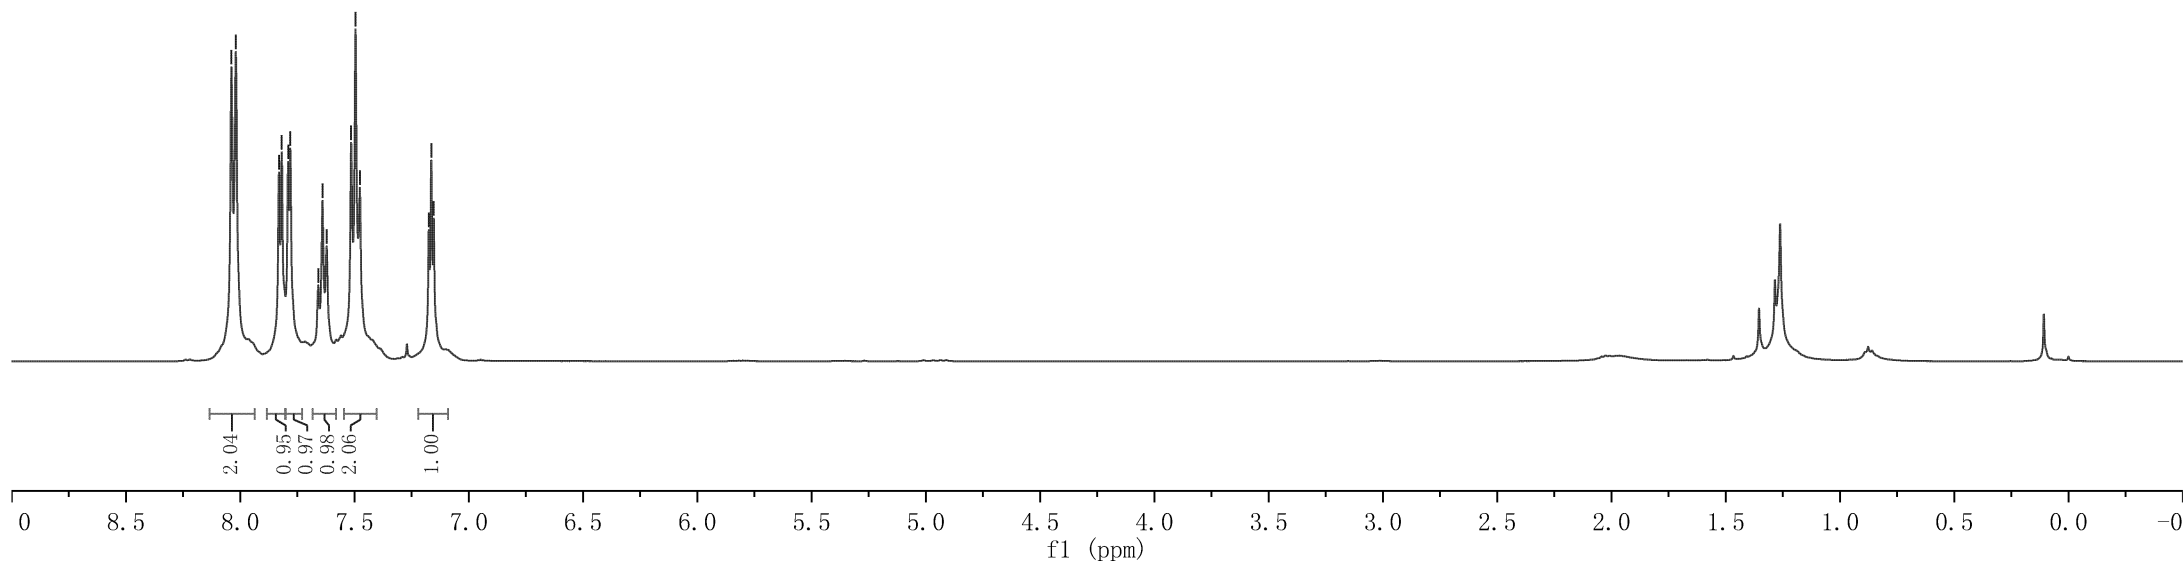

— 191.98

— 185.50

139.69  
136.81  
136.63  
134.76  
132.48  
130.06  
128.81  
128.73

77.32  
77.00  
76.68

| Parameter                | Value               |
|--------------------------|---------------------|
| 1 Title                  | XHJ-2-DIKETONE-2-C  |
| 2 Origin                 | Bruker BioSpin GmbH |
| 3 Solvent                | CDC13               |
| 4 Temperature            | 300.0               |
| 5 Number of Scans        | 10                  |
| 6 Acquisition Time       | 1.3631              |
| 7 Acquisition Date       | 2022-08-16T21:03:16 |
| 8 Spectrometer Frequency | 100.61              |
| 9 Spectral Width         | 24038.5             |

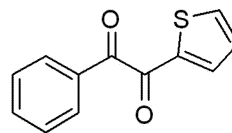

**2b**

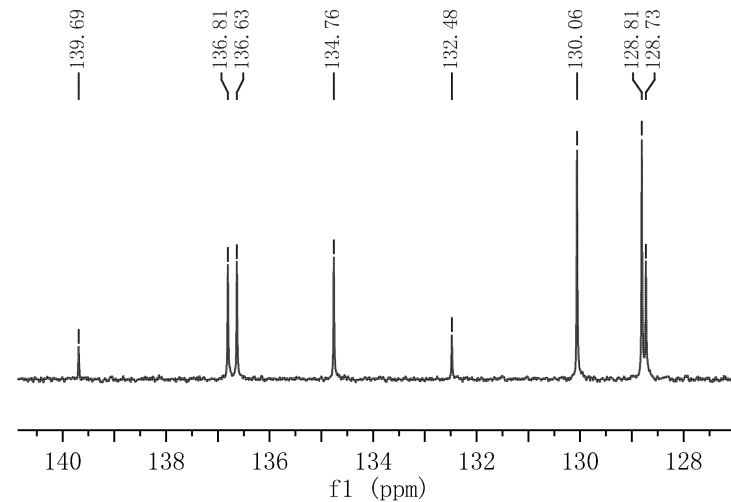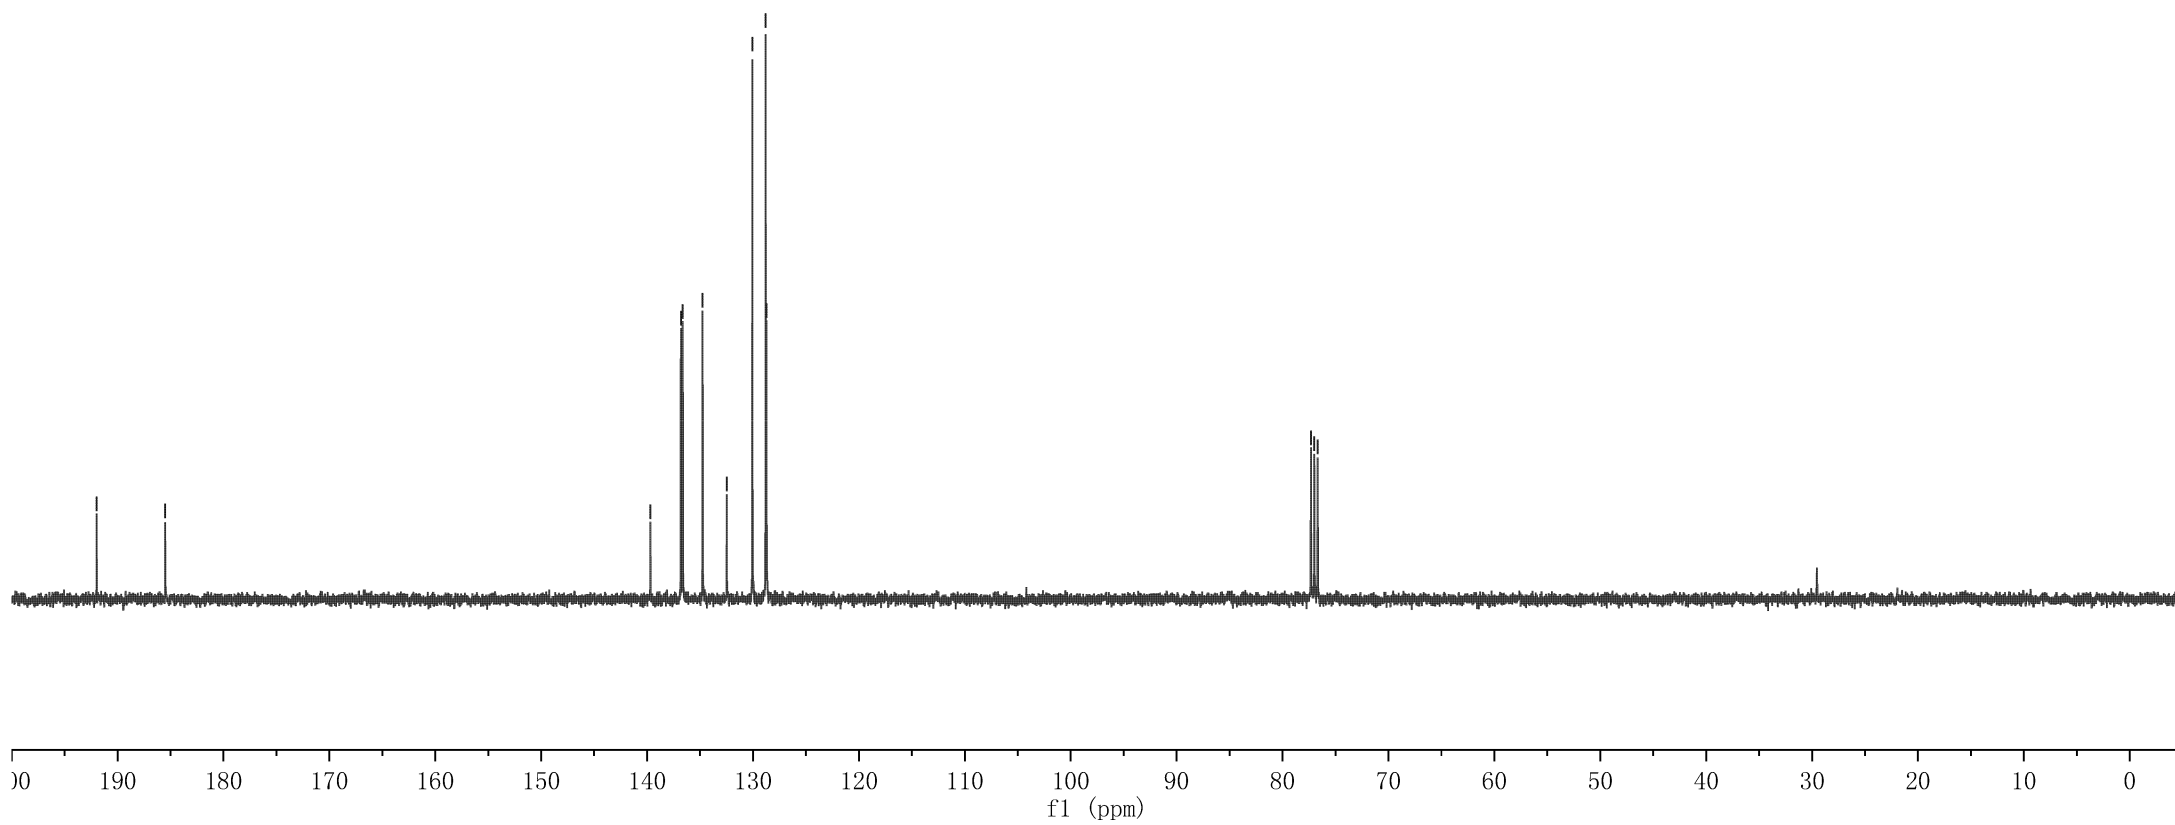

7.889  
7.870  
7.432  
7.421  
7.413  
7.401  
7.389  
7.122  
7.112  
7.103  
7.092  
7.083

3.836  
3.819  
3.802  
3.786  
3.769

1.193  
1.176

| Parameter                | Value               |
|--------------------------|---------------------|
| 1 Title                  | XHJ-2-diketone-H    |
| 2 Origin                 |                     |
| 3 Solvent                | CDC13               |
| 4 Temperature            | 299.6               |
| 5 Number of Scans        | 16                  |
| 6 Acquisition Time       | 4.0002              |
| 7 Acquisition Date       | 2022-08-11T15:47:48 |
| 8 Spectrometer Frequency | 399.92              |
| 9 Spectral Width         | 8012.0              |

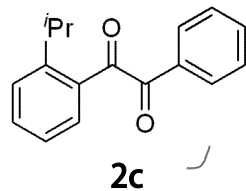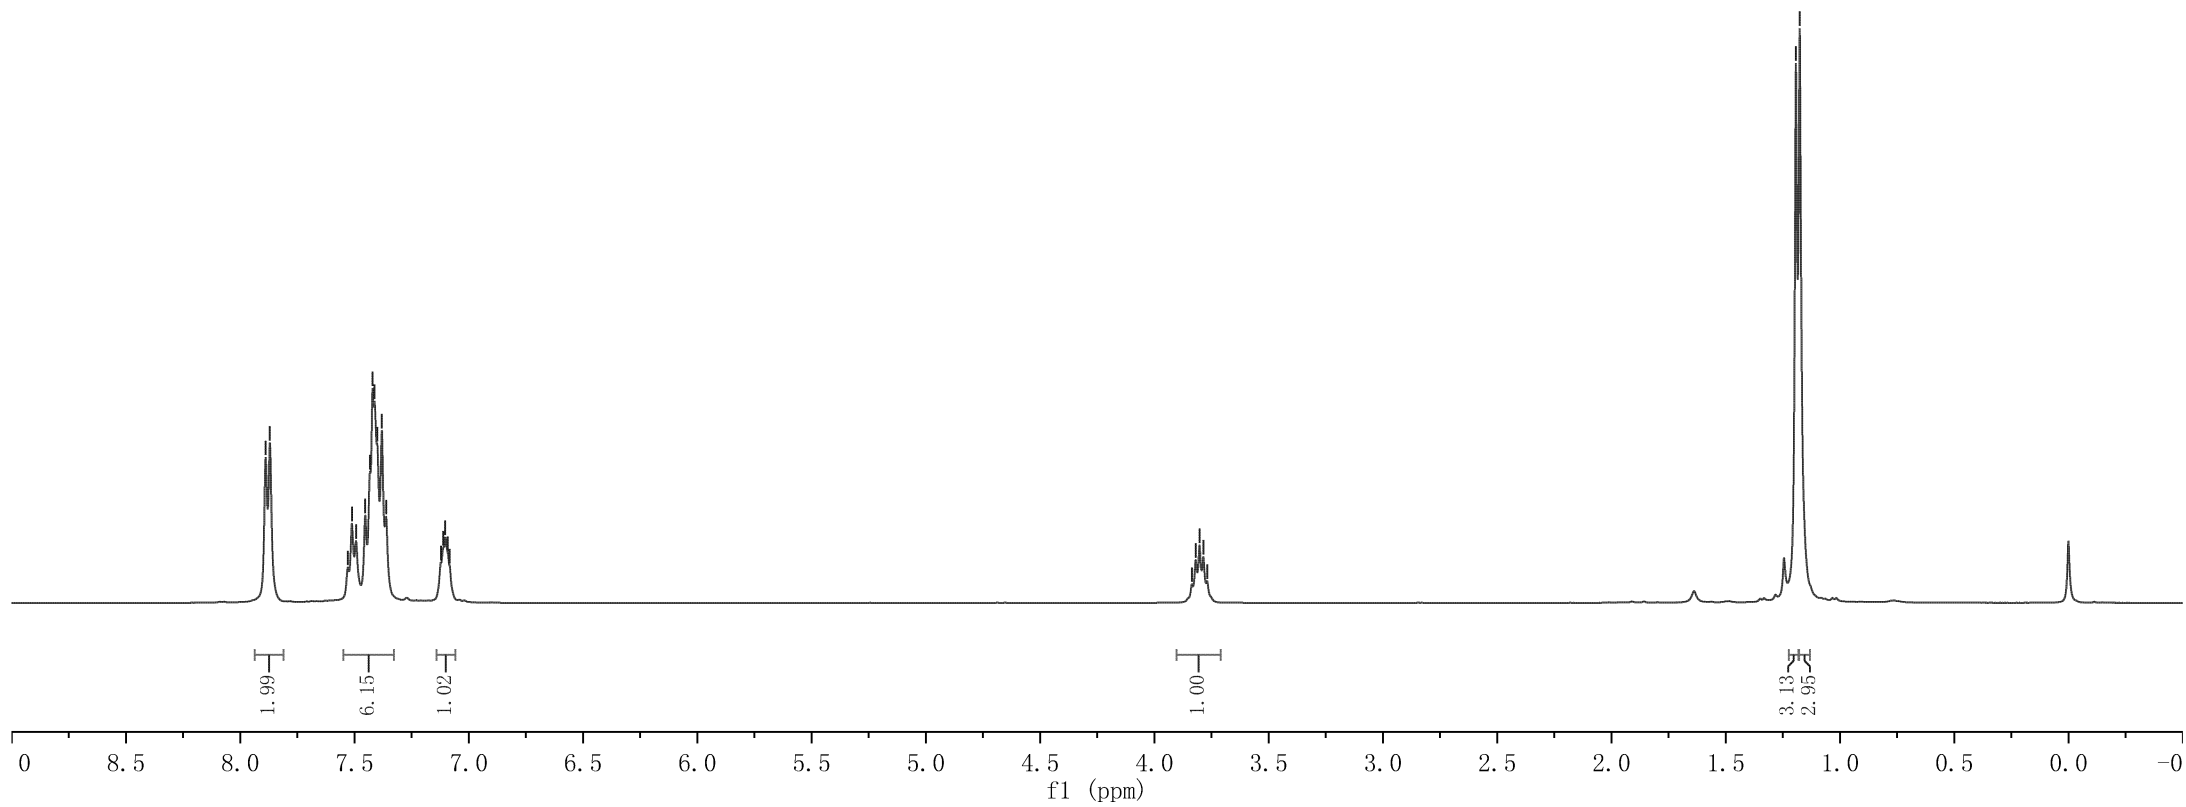

— 196.94  
— 194.24

— 151.60

134.56  
133.72  
133.04  
132.37  
131.68  
129.84  
128.91  
126.96  
125.63

77.32  
77.00  
76.68

| Parameter                | Value               |
|--------------------------|---------------------|
| 1 Title                  | XHJ-2-DIKETONE-1-C  |
| 2 Origin                 | Bruker BioSpin GmbH |
| 3 Solvent                | CDC13               |
| 4 Temperature            | 300.0               |
| 5 Number of Scans        | 7                   |
| 6 Acquisition Time       | 1.3631              |
| 7 Acquisition Date       | 2022-08-16T20:53:27 |
| 8 Spectrometer Frequency | 100.61              |
| 9 Spectral Width         | 24038.5             |

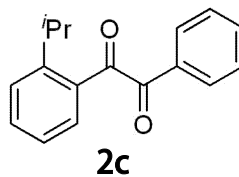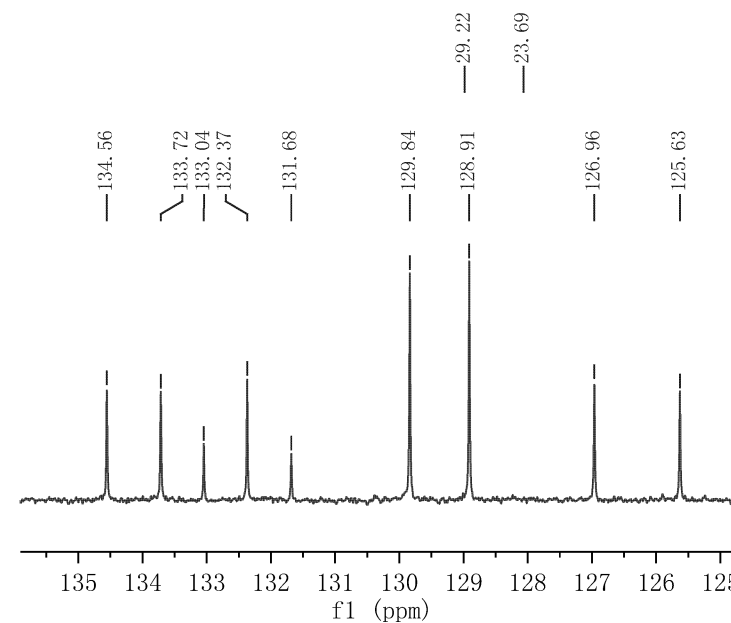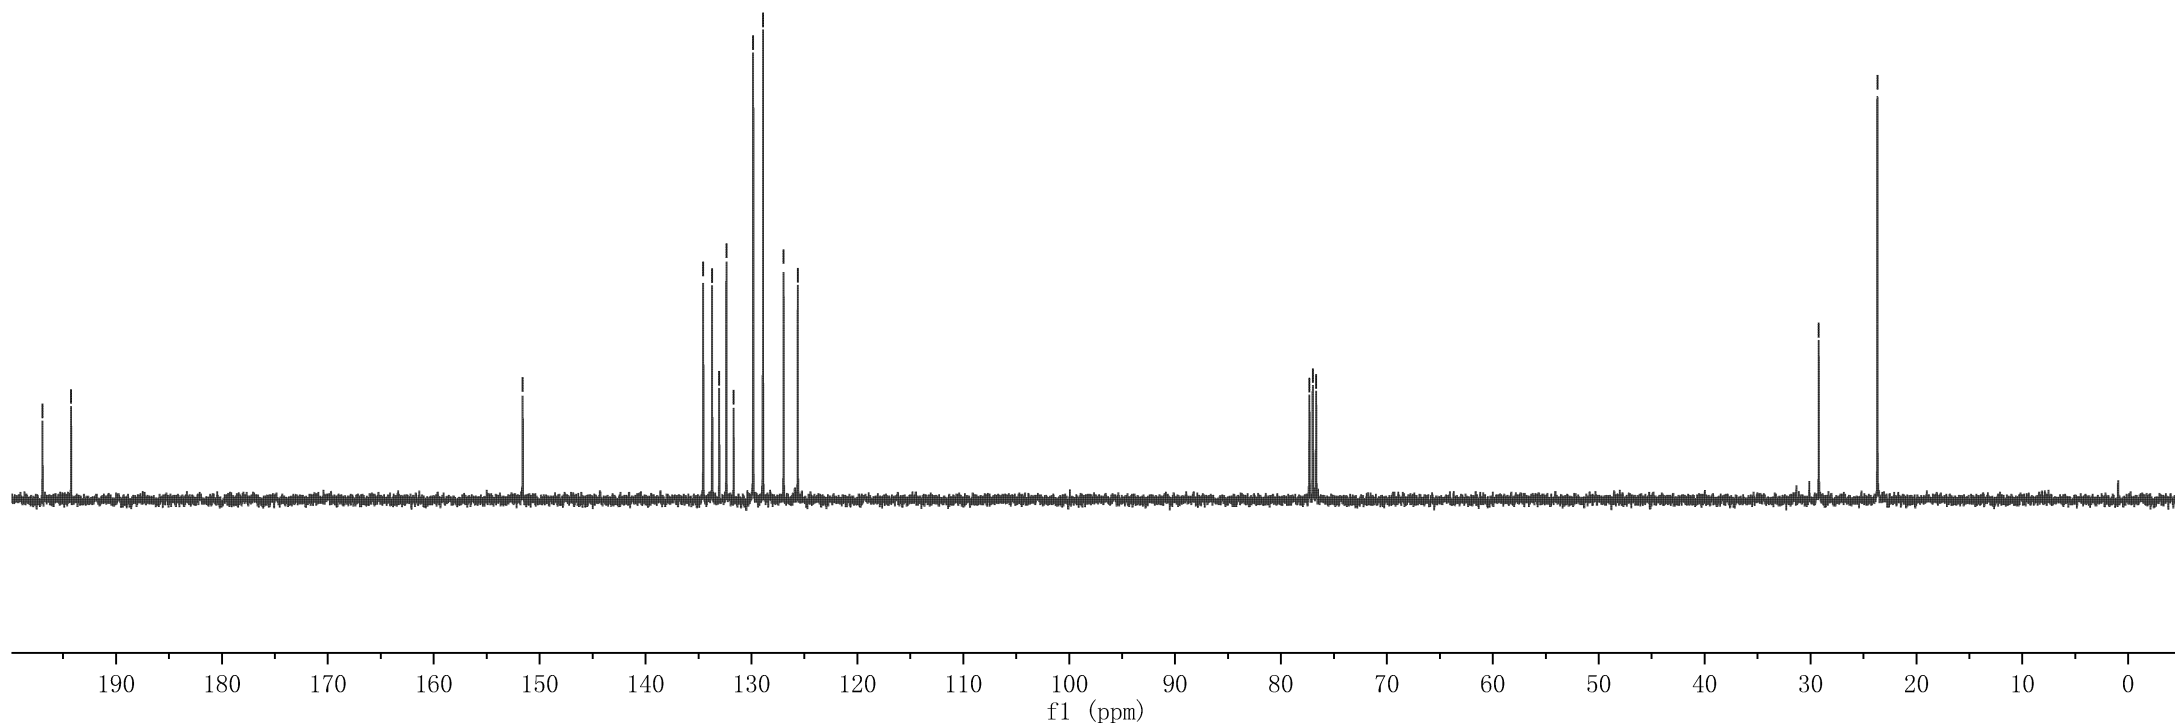

7.492  
7.476  
7.473  
7.301  
7.294  
7.282  
7.264  
7.248  
7.241  
7.219  
7.205  
7.201  
7.070  
7.064  
6.995  
6.905  
6.899  
6.864  
6.845

| Parameter                | Value               |
|--------------------------|---------------------|
| 1 Title                  | XHJ-1-151-H         |
| 2 Origin                 |                     |
| 3 Solvent                | CDC13               |
| 4 Temperature            | 296.8               |
| 5 Number of Scans        | 16                  |
| 6 Acquisition Time       | 4.0002              |
| 7 Acquisition Date       | 2022-01-12T22:25:12 |
| 8 Spectrometer Frequency | 399.93              |
| 9 Spectral Width         | 8012.0              |

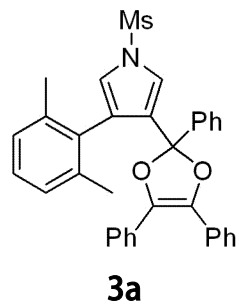

3.161

1.955

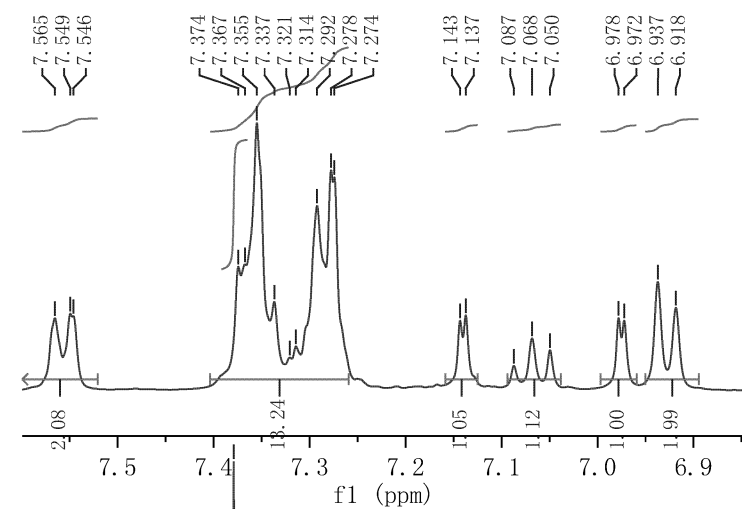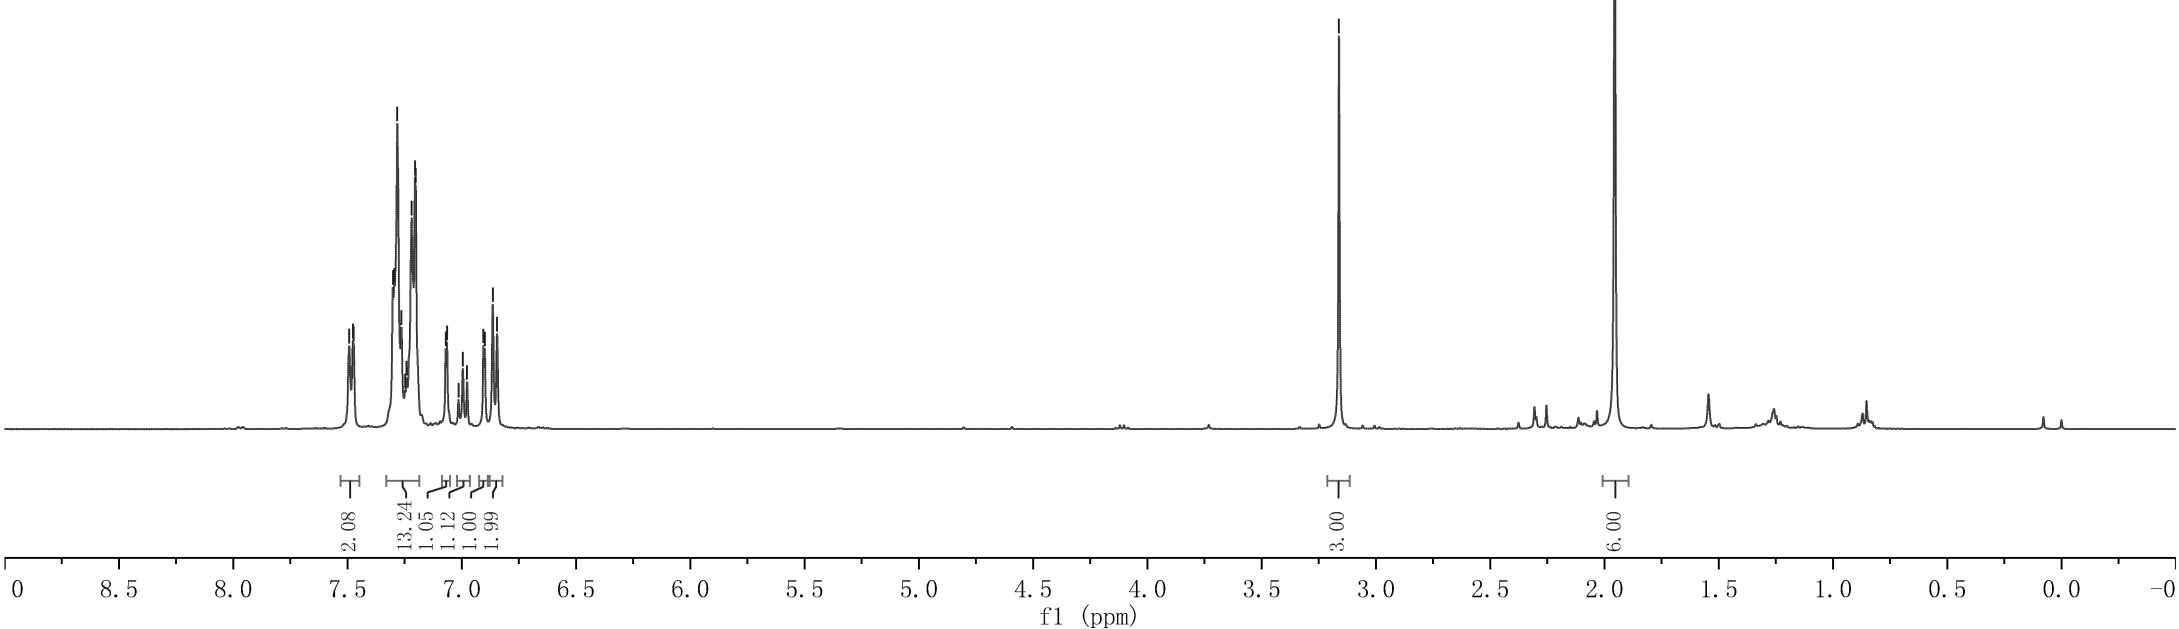

| Parameter                | Value               |
|--------------------------|---------------------|
| 1 Title                  | XHJ-1-151-C         |
| 2 Origin                 |                     |
| 3 Solvent                | CDC13               |
| 4 Temperature            | 296.8               |
| 5 Number of Scans        | 200                 |
| 6 Acquisition Time       | 1.0000              |
| 7 Acquisition Date       | 2022-01-12T22:34:08 |
| 8 Spectrometer Frequency | 100.56              |
| 9 Spectral Width         | 26041.0             |

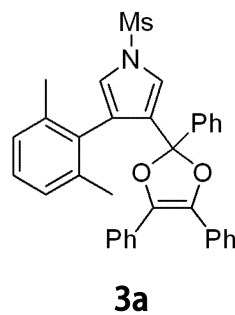

141.03  
138.15  
128.59  
128.00  
127.77  
127.73  
126.59  
126.23  
120.77  
118.99

108.39

77.32  
77.00  
76.68

42.83

20.84

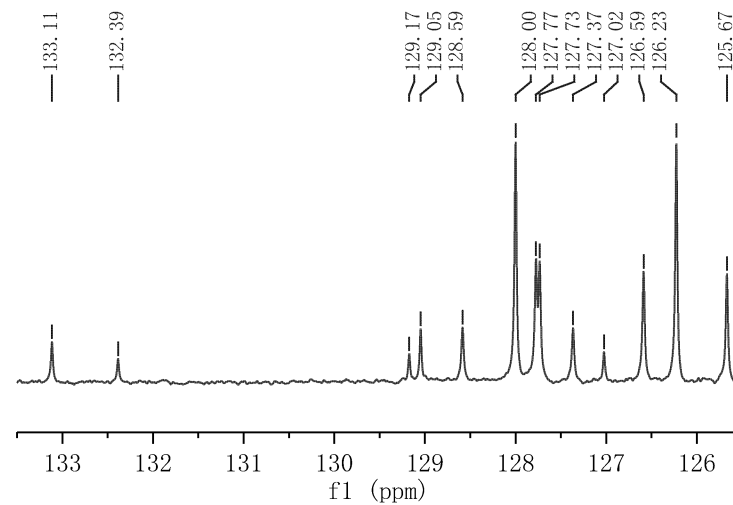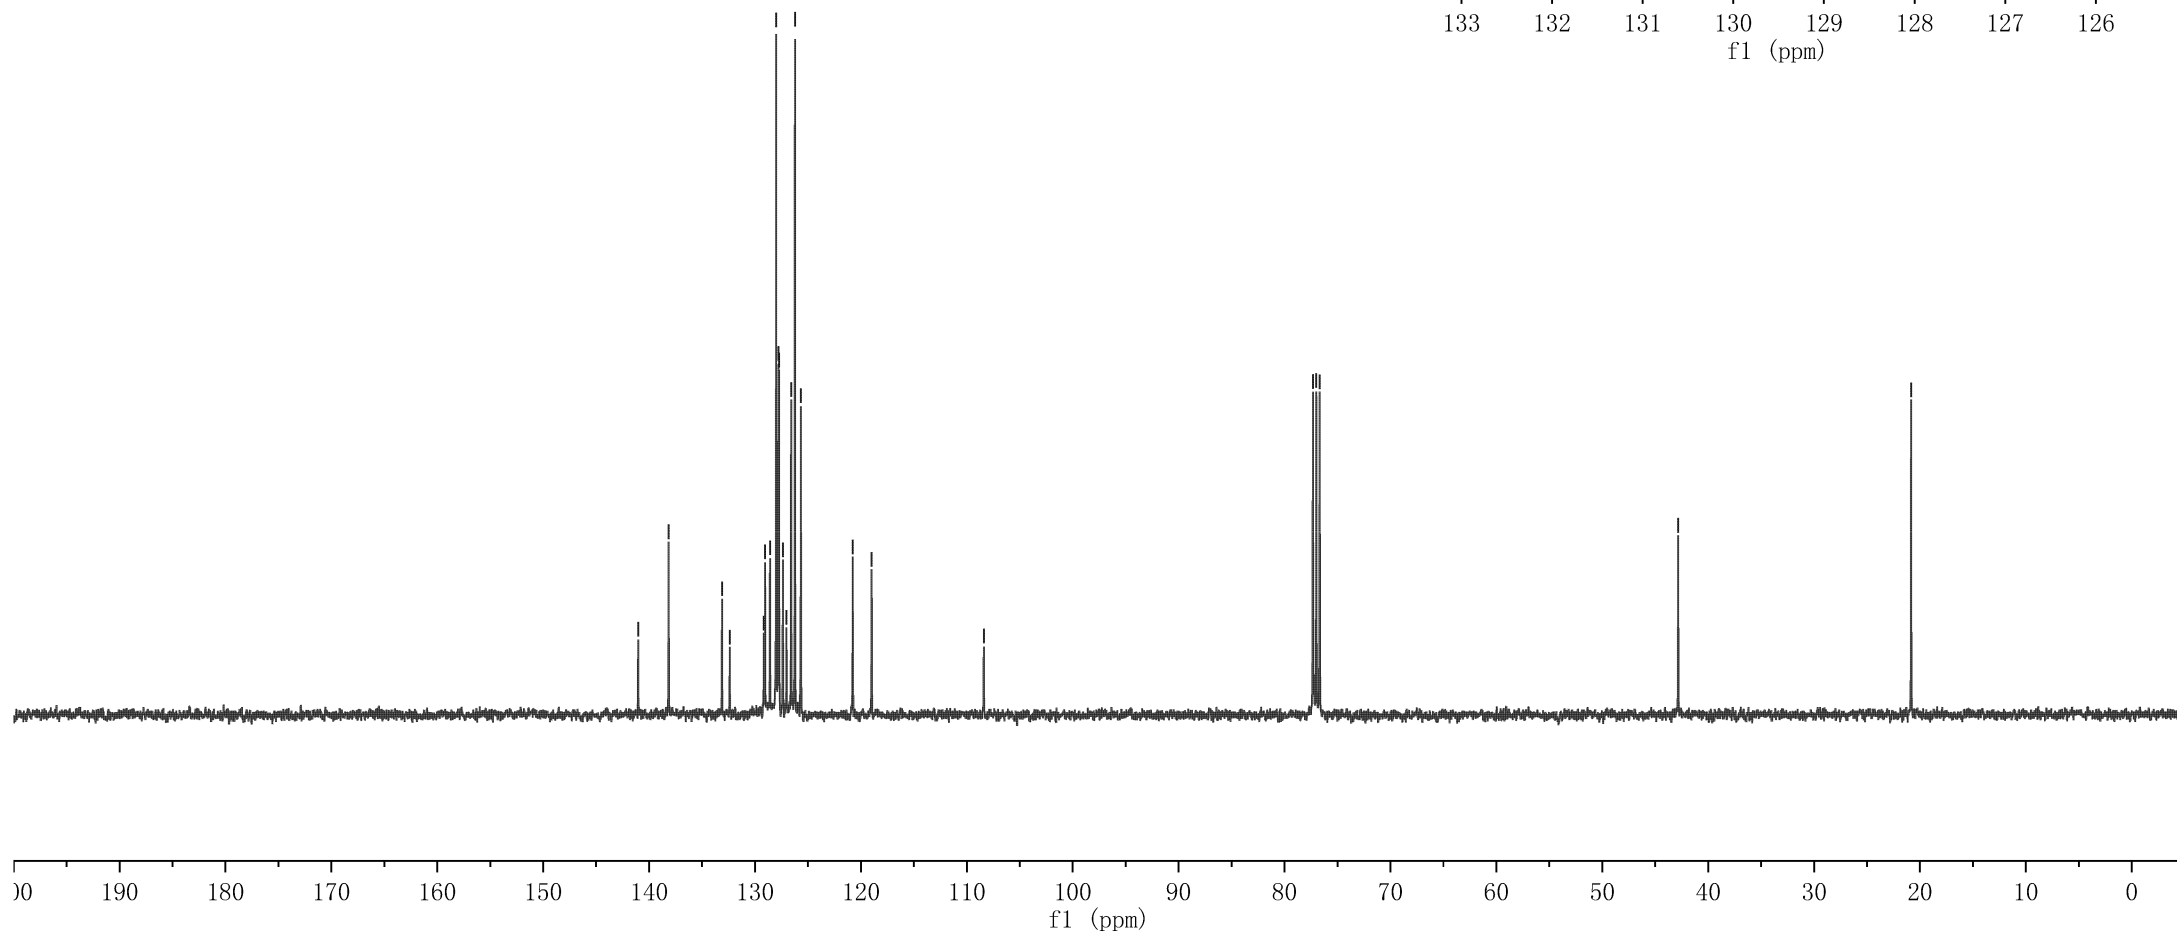

7.705  
7.685  
7.430  
7.413  
7.283  
7.260  
7.246  
7.242  
7.225  
7.201  
7.196  
7.188  
7.184  
7.099  
7.093  
6.979  
6.961  
6.942  
6.918  
6.820  
6.801

| Parameter                | Value               |
|--------------------------|---------------------|
| 1 Title                  | XHJ-1-136-H         |
| 2 Origin                 | Bruker BioSpin GmbH |
| 3 Solvent                | CDC13               |
| 4 Temperature            | 298.0               |
| 5 Number of Scans        | 19                  |
| 6 Acquisition Time       | 4.0894              |
| 7 Acquisition Date       | 2022-01-06T15:47:59 |
| 8 Spectrometer Frequency | 400.13              |
| 9 Spectral Width         | 8012.8              |

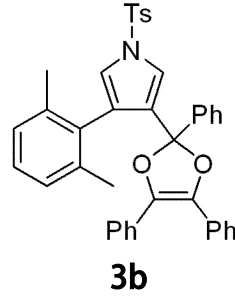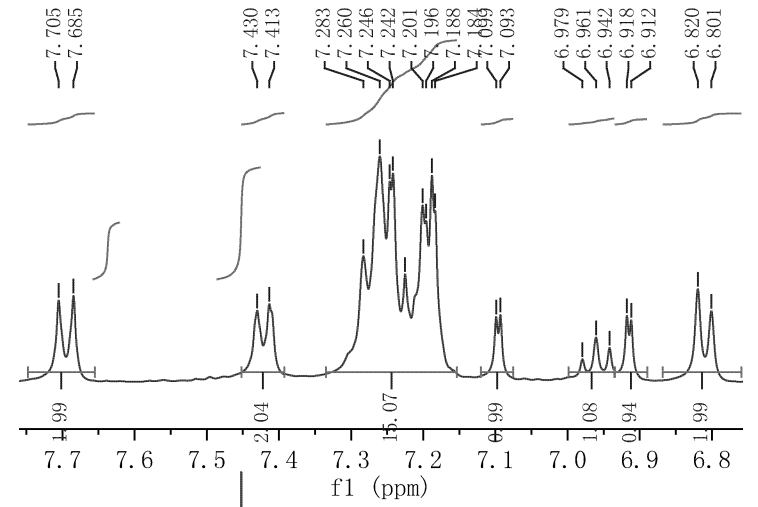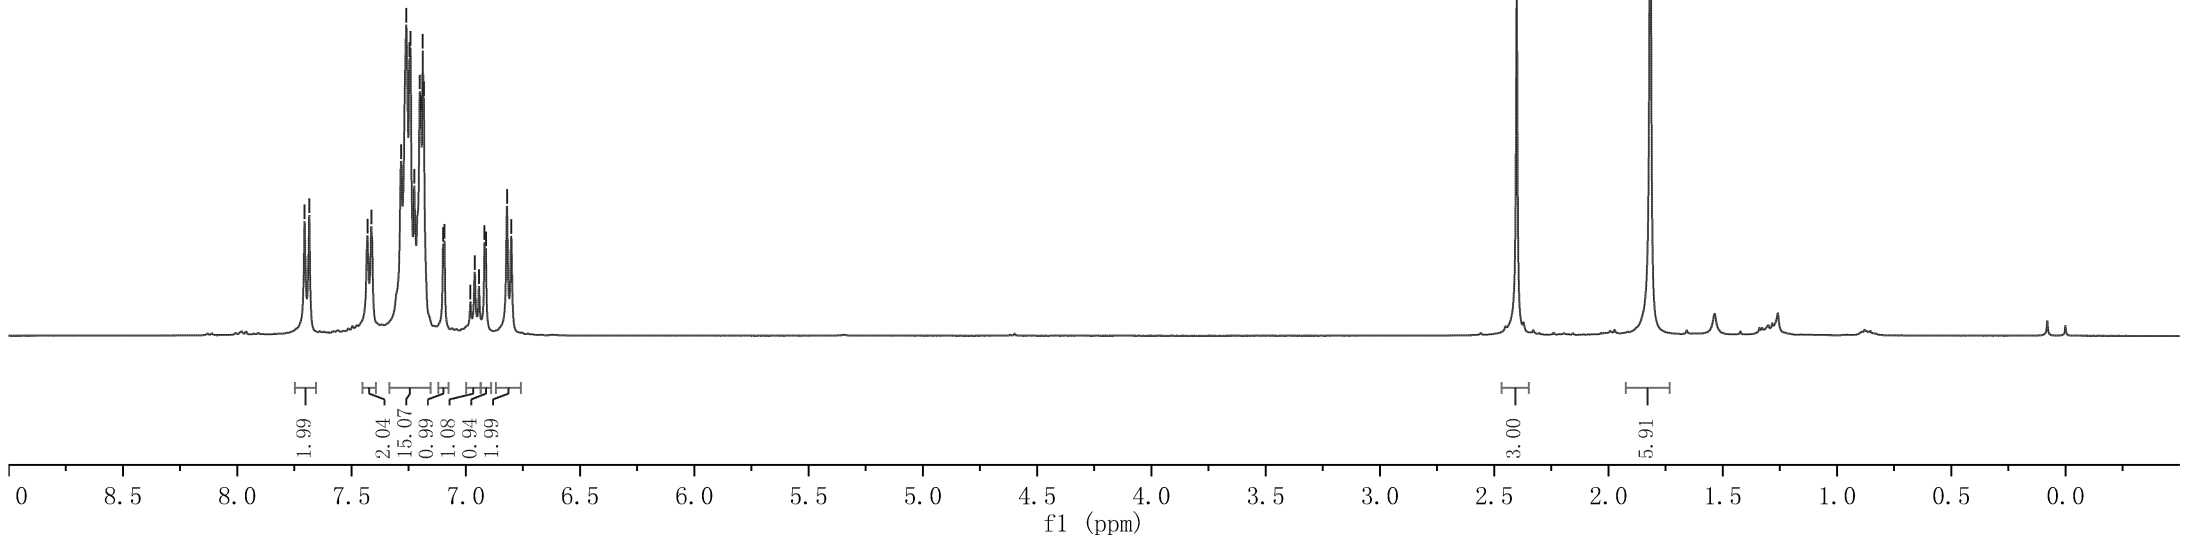

| Parameter                | Value               |
|--------------------------|---------------------|
| 1 Title                  | XHJ-1-136-C         |
| 2 Origin                 | Bruker BioSpin GmbH |
| 3 Solvent                | CDC13               |
| 4 Temperature            | 300.0               |
| 5 Number of Scans        | 134                 |
| 6 Acquisition Time       | 1.3631              |
| 7 Acquisition Date       | 2022-01-06T15:50:53 |
| 8 Spectrometer Frequency | 100.61              |
| 9 Spectral Width         | 24038.5             |

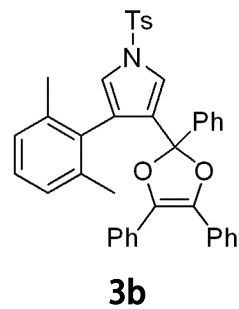

145.06  
141.01  
138.13  
135.96  
133.11  
132.52  
129.93  
129.22  
129.10  
128.50  
127.97  
127.73  
127.65  
127.26  
127.20  
126.68  
126.50  
126.24  
125.69  
121.27  
119.66

108.50

77.32  
77.00  
76.68

21.60  
20.66

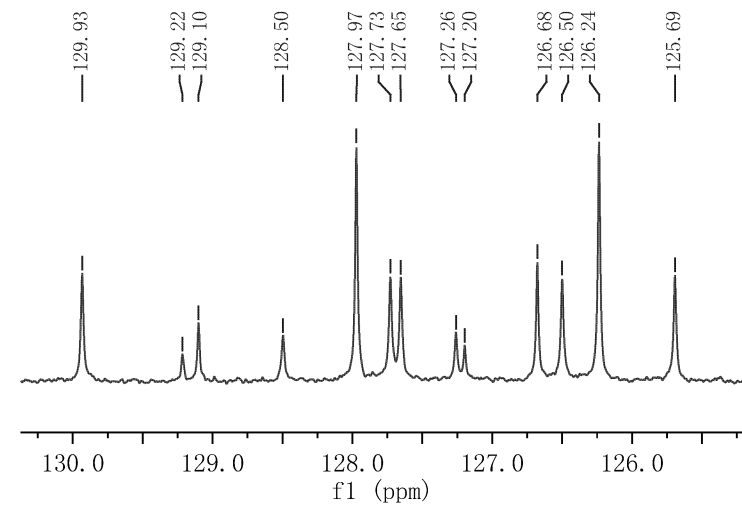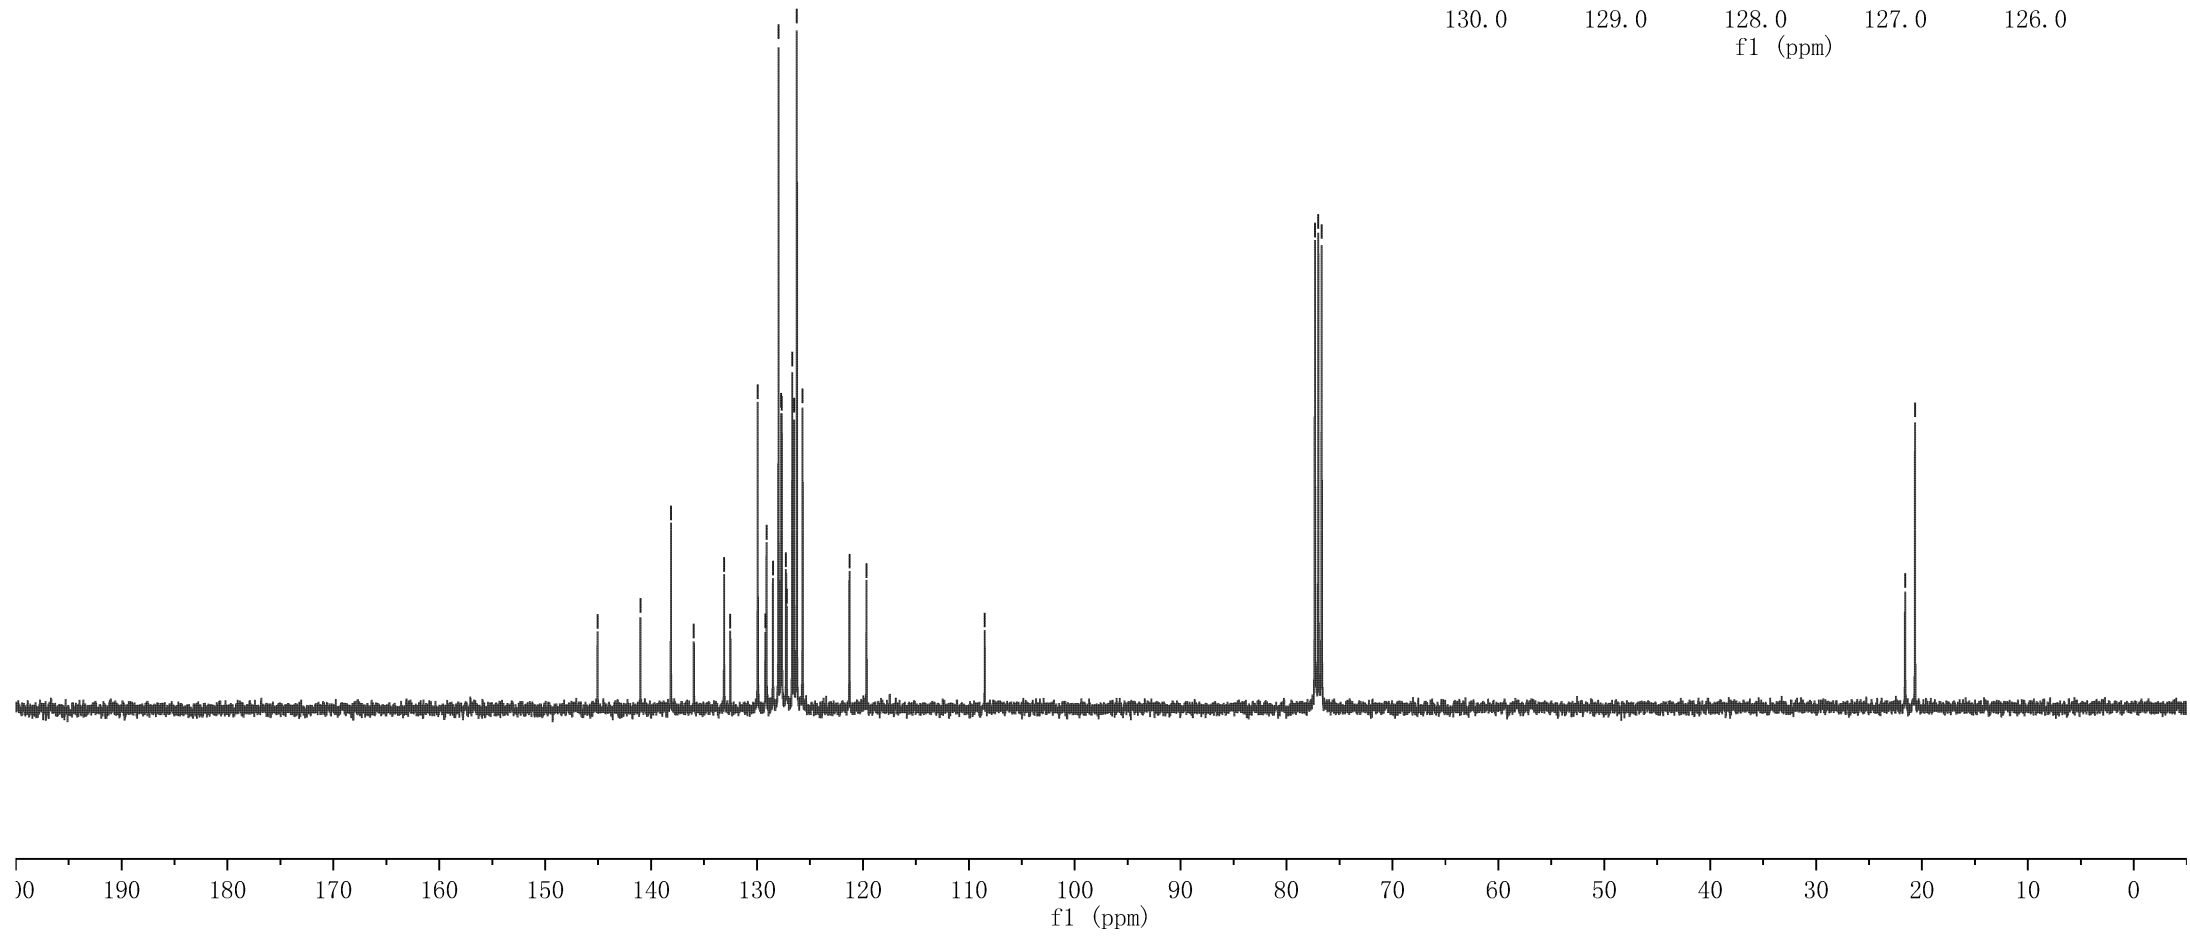



129.92  
128.49  
127.97  
127.73  
127.65  
127.26  
126.64  
126.50  
126.21  
125.67  
121.25  
119.66

| Parameter                | Value               |
|--------------------------|---------------------|
| 1 Title                  | XHJ-3b-DEPT135      |
| 2 Origin                 |                     |
| 3 Solvent                | CDC13               |
| 4 Temperature            | 300.0               |
| 5 Number of Scans        | 50                  |
| 6 Acquisition Time       | 1.0001              |
| 7 Acquisition Date       | 2022-08-28T16:53:40 |
| 8 Spectrometer Frequency | 100.56              |
| 9 Spectral Width         | 18028.0             |

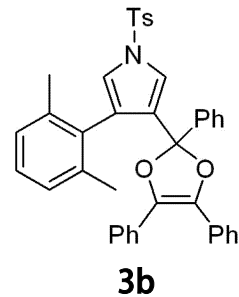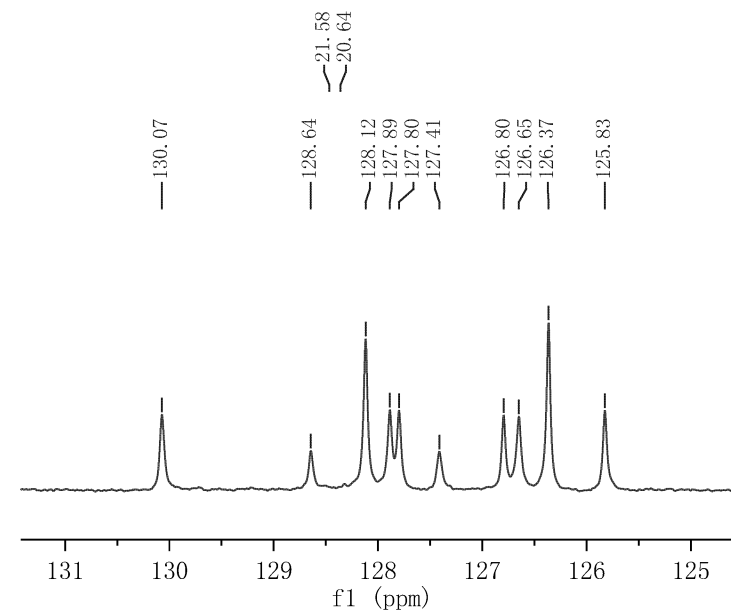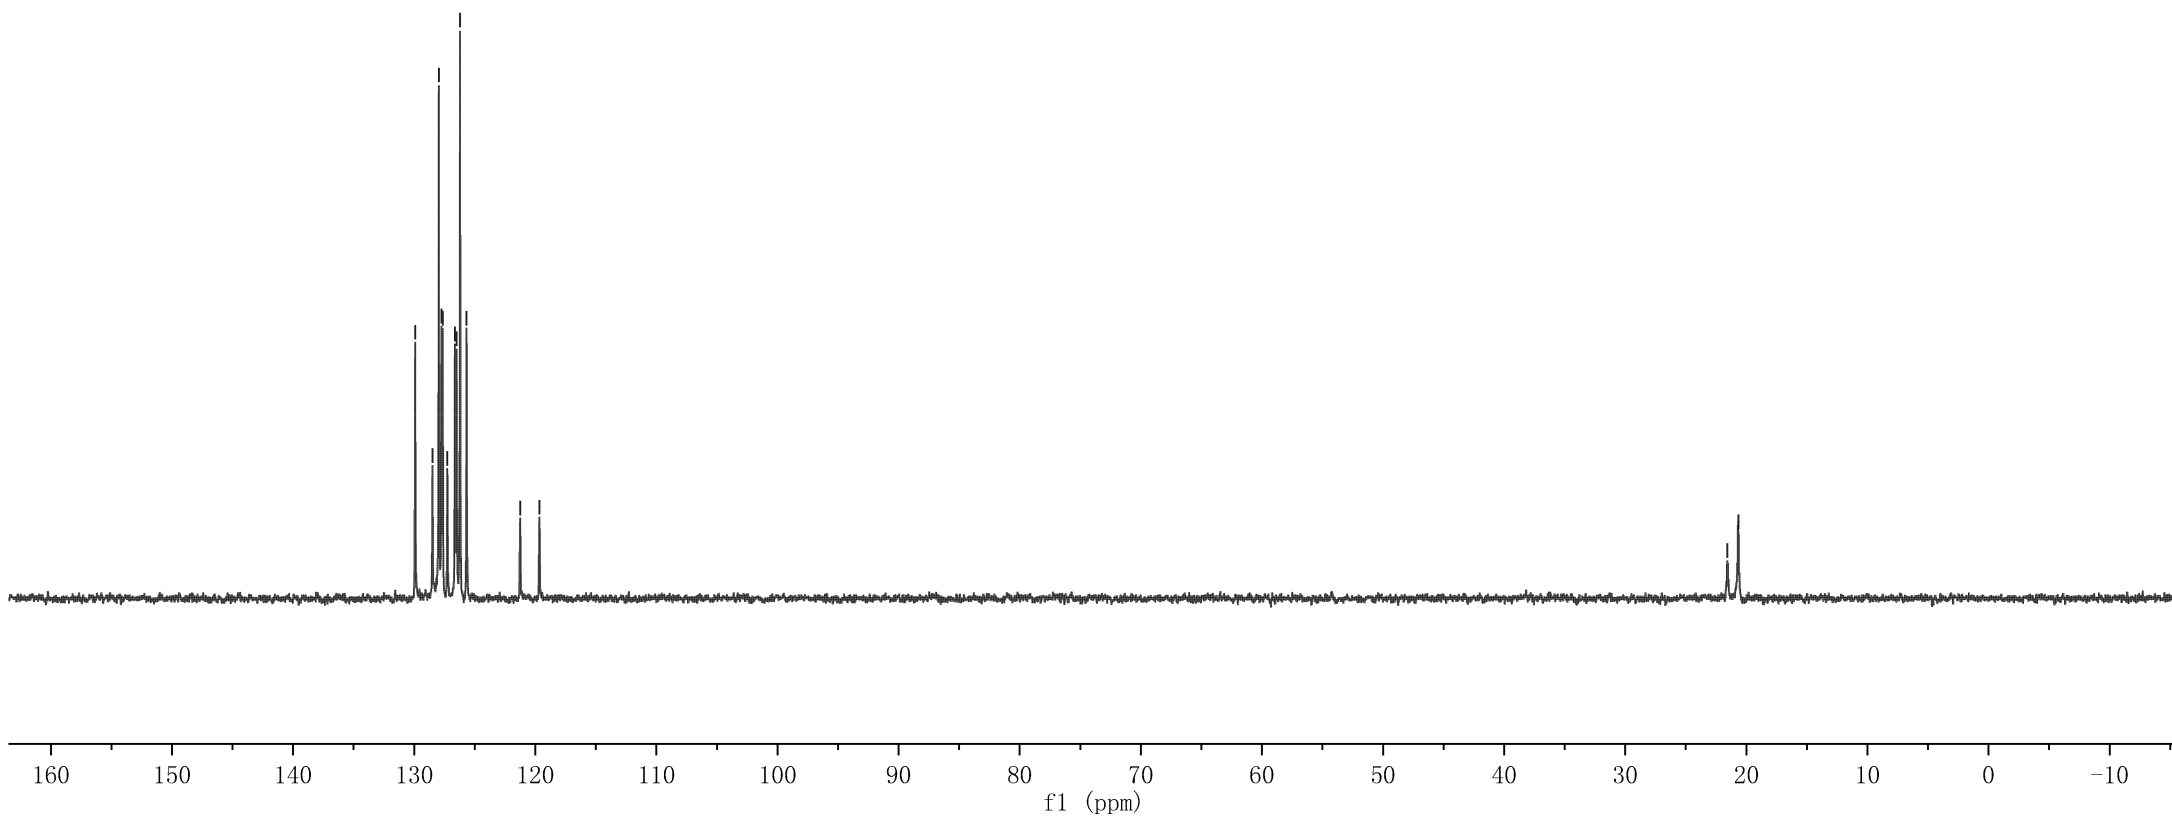

7.489  
7.472  
7.300  
7.282  
7.264  
7.241  
7.226  
7.220  
7.205  
7.047  
7.042  
7.012  
6.993  
6.974  
6.884  
6.879  
6.862  
6.843

| Parameter                | Value               |
|--------------------------|---------------------|
| 1 Title                  | 3c                  |
| 2 Origin                 |                     |
| 3 Solvent                | CDC13               |
| 4 Temperature            | 297.4               |
| 5 Number of Scans        | 16                  |
| 6 Acquisition Time       | 4.0002              |
| 7 Acquisition Date       | 2022-01-18T13:02:03 |
| 8 Spectrometer Frequency | 399.93              |
| 9 Spectral Width         | 8012.0              |

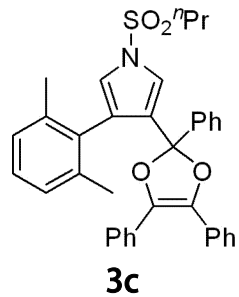

3.235  
3.216  
3.196

1.770  
1.751  
1.733  
1.713  
1.695  
1.676

1.022  
1.003  
0.985

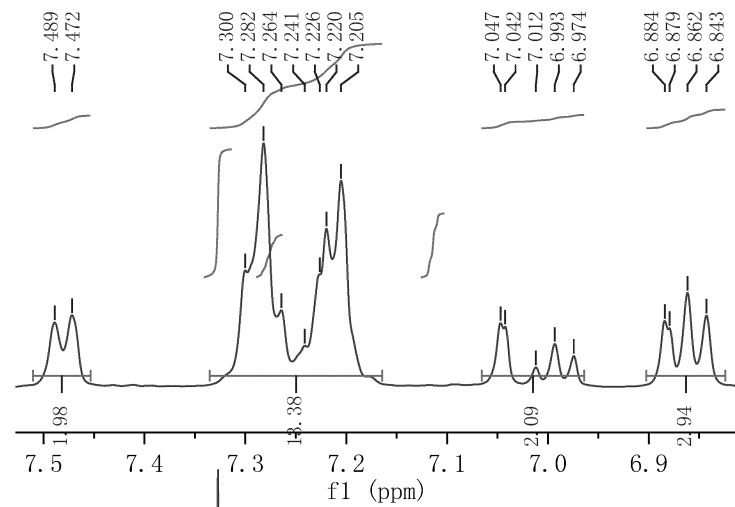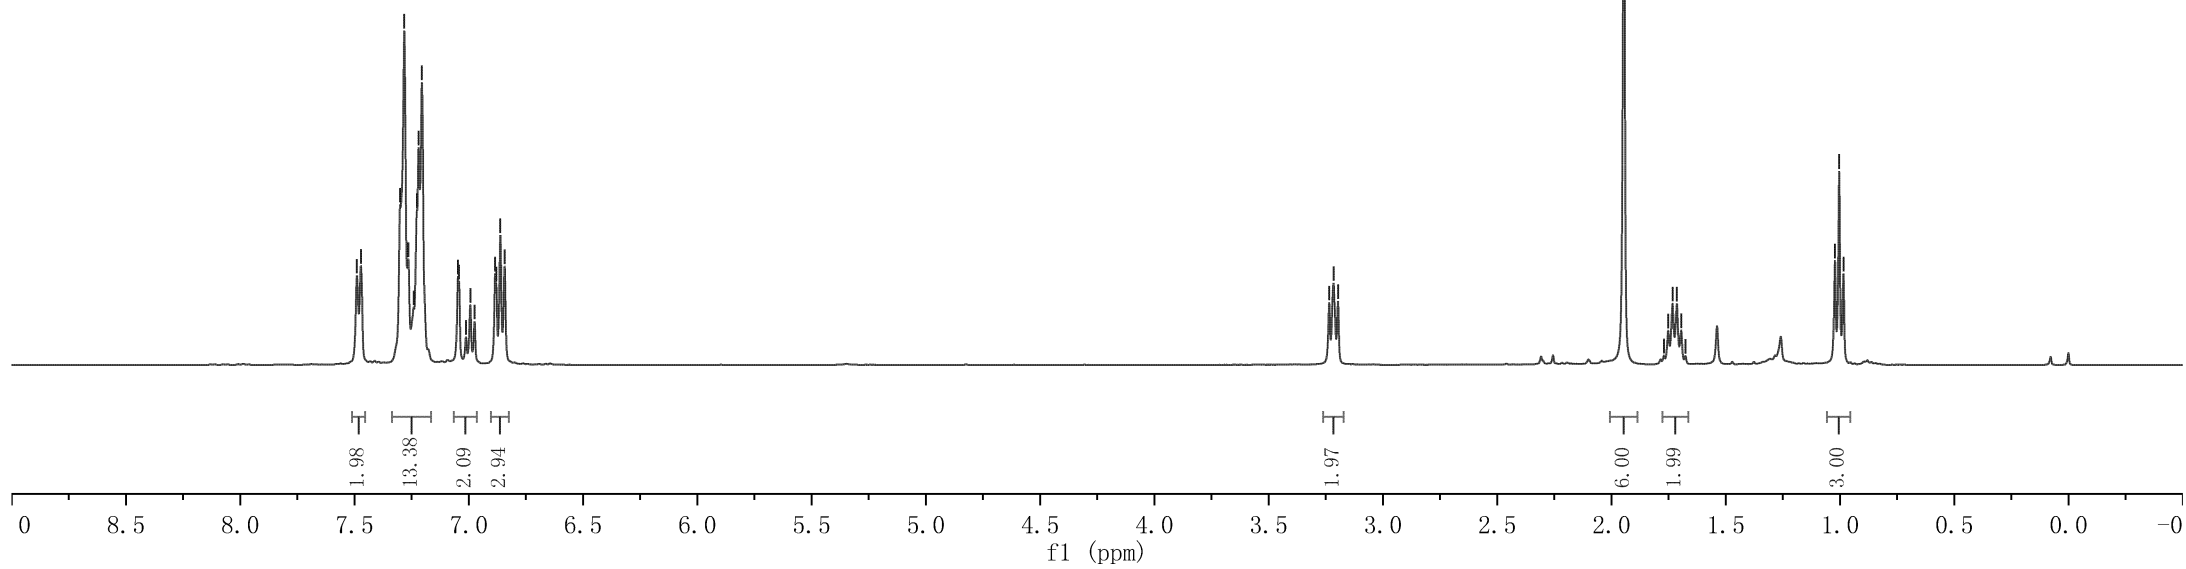

| Parameter                | Value               |
|--------------------------|---------------------|
| 1 Title                  | 3c                  |
| 2 Origin                 | k                   |
| 3 Solvent                | CDC13               |
| 4 Temperature            | 297.5               |
| 5 Number of Scans        | 300                 |
| 6 Acquisition Time       | 1.0000              |
| 7 Acquisition Date       | 2022-01-18T13:14:31 |
| 8 Spectrometer Frequency | 100.56              |
| 9 Spectral Width         | 26041.0             |

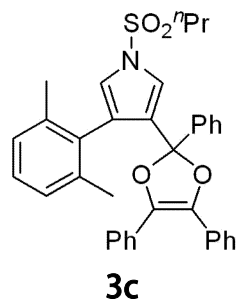

141.08  
138.18  
129.09  
127.99  
127.76  
127.72  
126.59  
126.23  
121.62  
119.48  
108.46

77.32  
77.00  
76.68

57.23

20.81  
17.13  
12.60

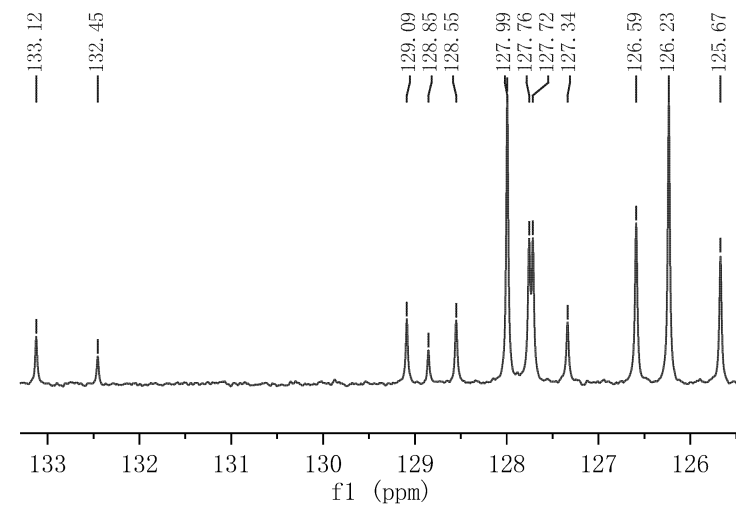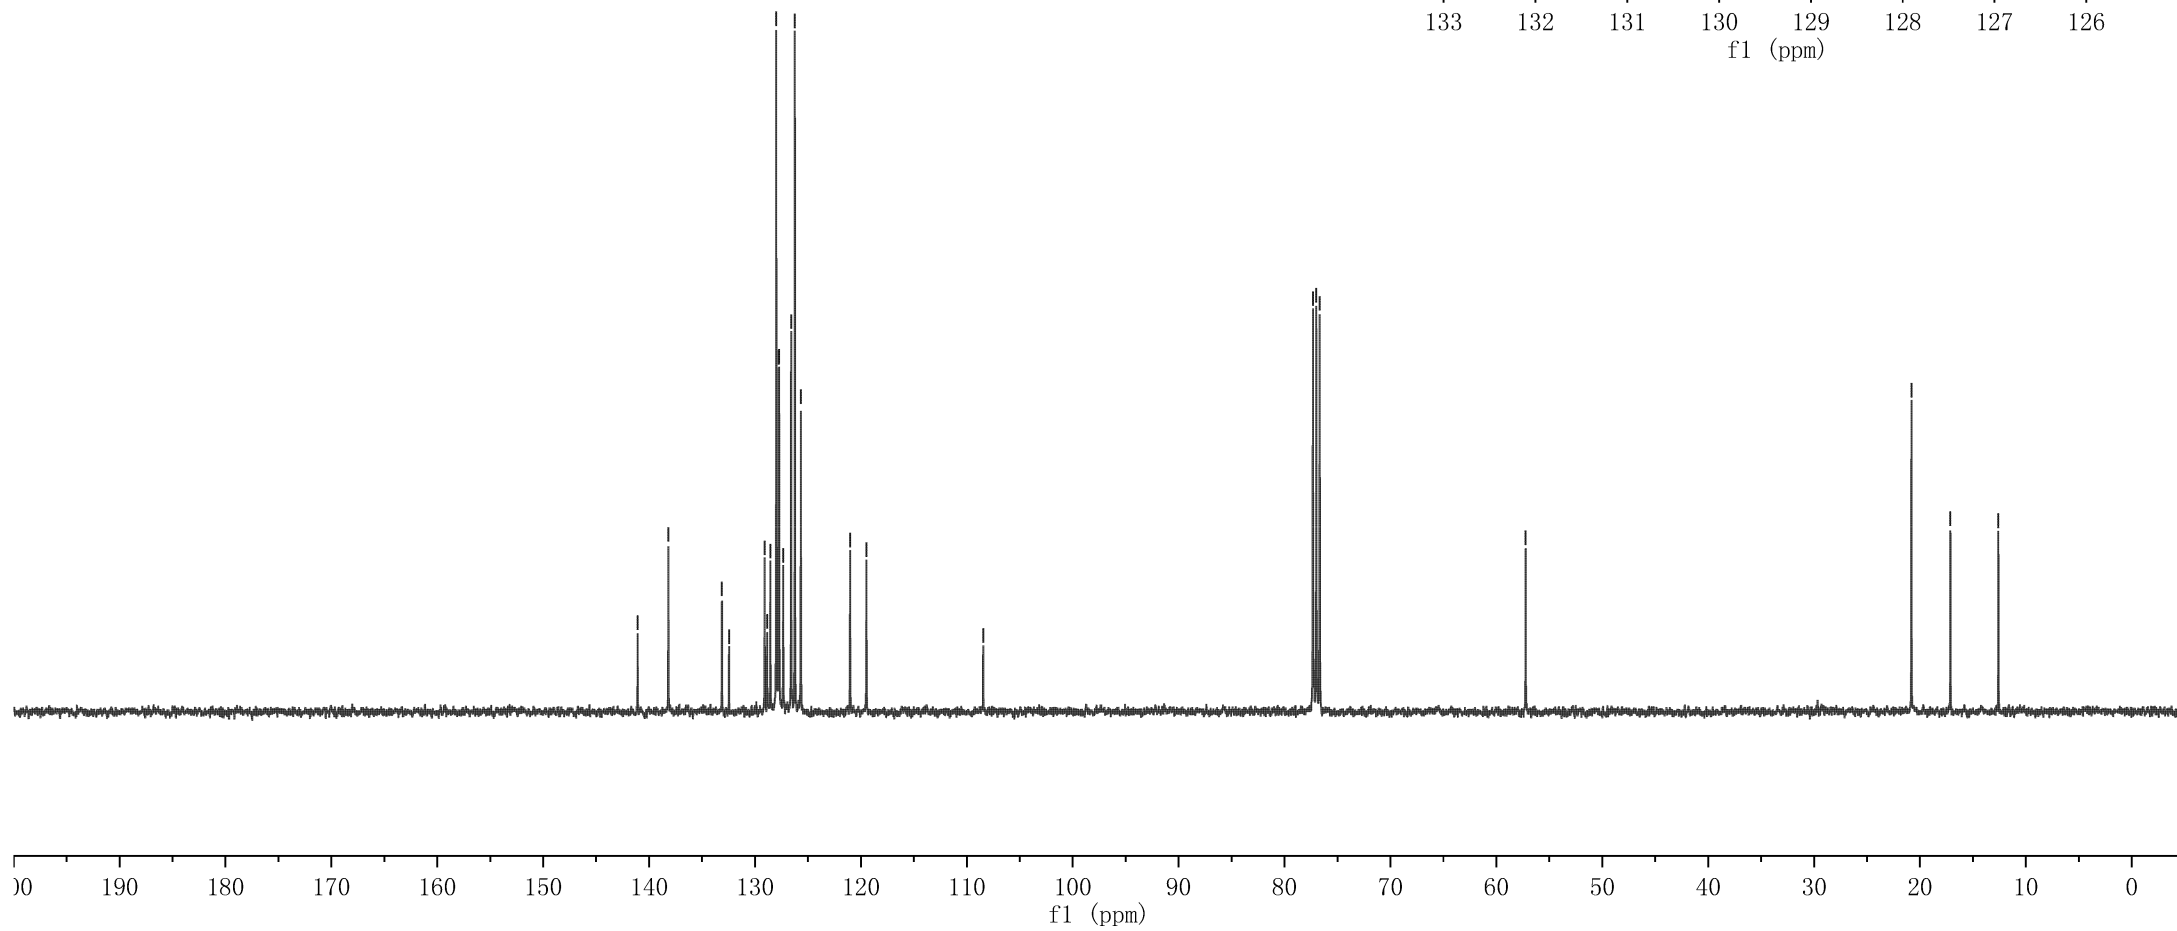

7.372  
7.347  
7.330  
7.314  
7.295  
7.272  
7.256  
7.245  
7.226  
7.213  
7.208  
7.183  
7.136  
7.118  
6.999  
6.980  
6.961  
6.842  
6.823  
6.676  
6.670  
6.592  
6.586

| Parameter                | Value               |
|--------------------------|---------------------|
| 1 Title                  | XHJ-1-161-H         |
| 2 Origin                 |                     |
| 3 Solvent                | CDC13               |
| 4 Temperature            | 297.6               |
| 5 Number of Scans        | 20                  |
| 6 Acquisition Time       | 4.0002              |
| 7 Acquisition Date       | 2022-01-17T23:53:35 |
| 8 Spectrometer Frequency | 399.93              |
| 9 Spectral Width         | 8012.0              |

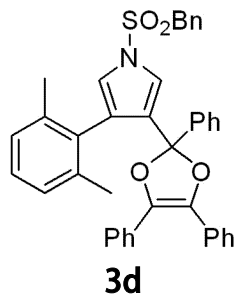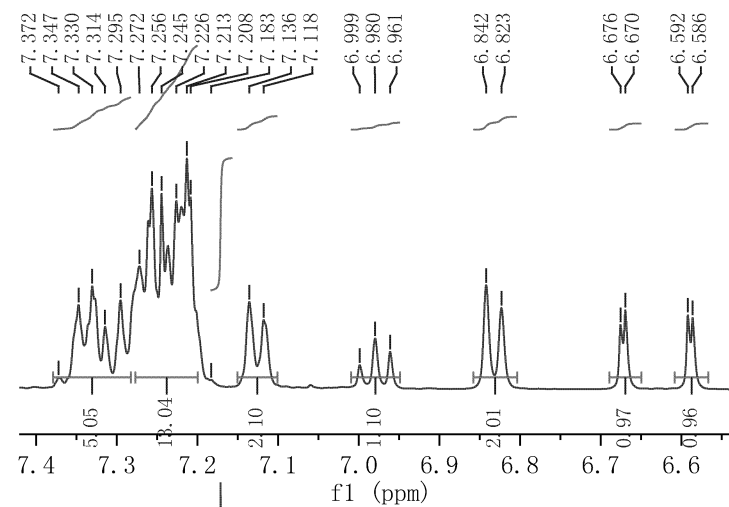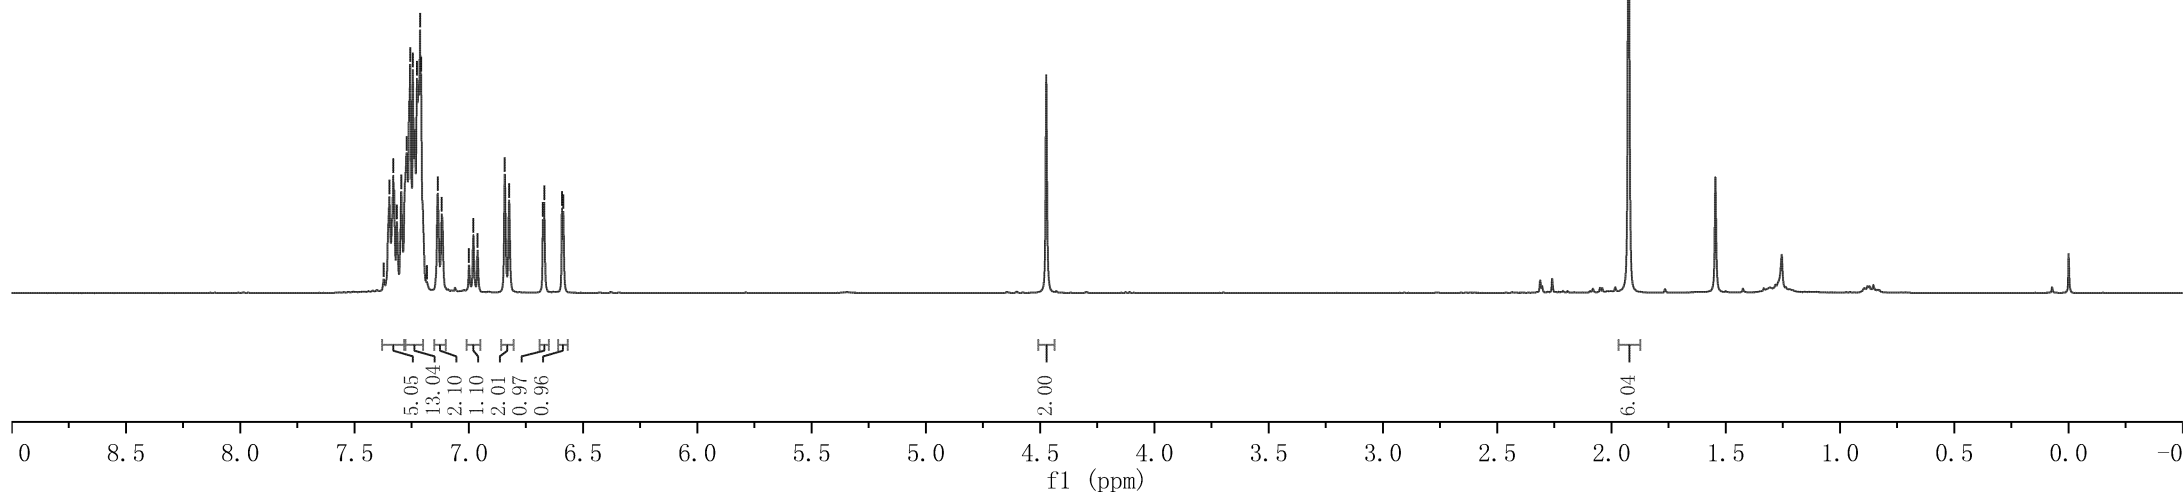

| Parameter                | Value               |
|--------------------------|---------------------|
| 1 Title                  | XHJ-1-161-C         |
| 2 Origin                 |                     |
| 3 Solvent                | CDC13               |
| 4 Temperature            | 297.6               |
| 5 Number of Scans        | 400                 |
| 6 Acquisition Time       | 1.0000              |
| 7 Acquisition Date       | 2022-01-18T00:09:10 |
| 8 Spectrometer Frequency | 100.56              |
| 9 Spectral Width         | 26041.0             |

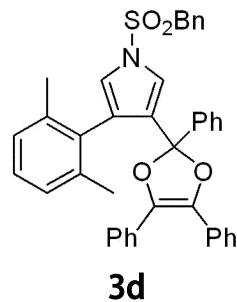

140.94  
138.21  
130.37  
129.43  
129.13  
129.04  
128.46  
127.99  
127.73  
127.59  
126.57  
126.23  
125.67  
121.84  
118.40

77.32  
77.00  
76.68

61.44

20.98

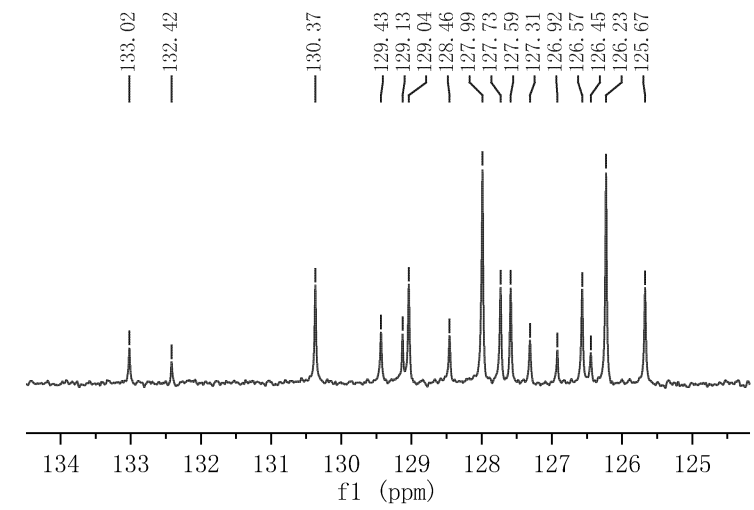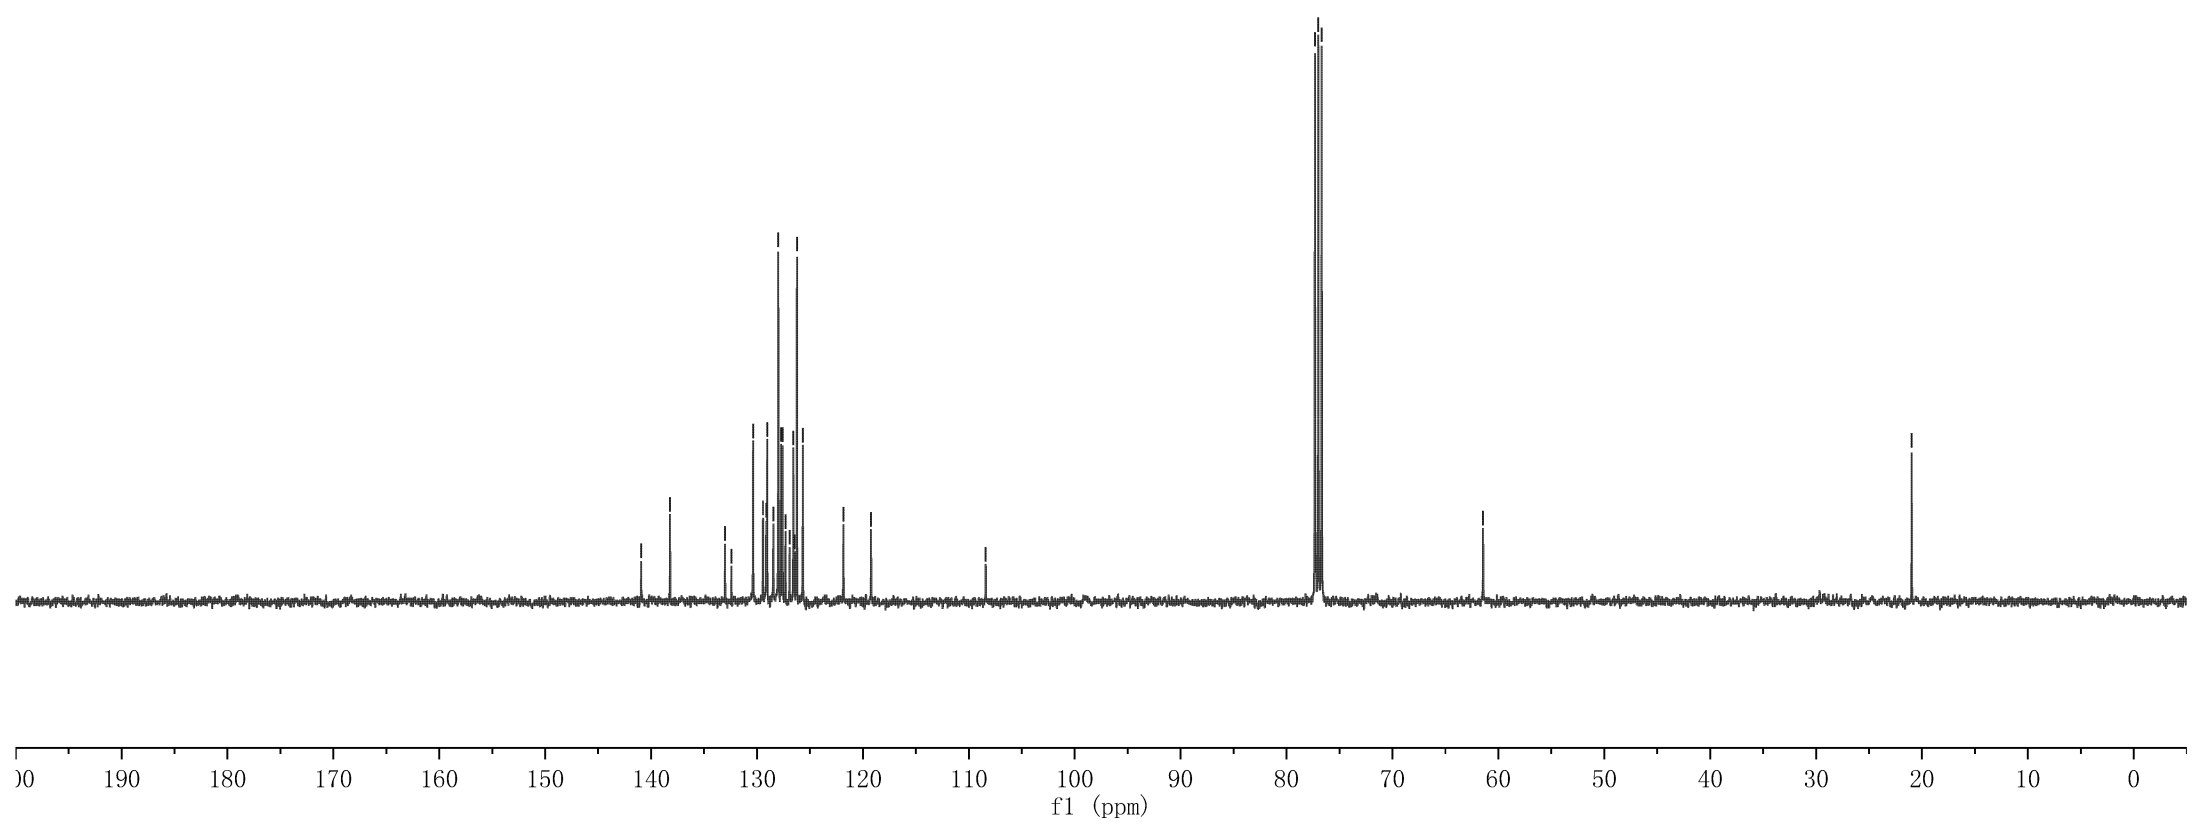

7.773  
7.751  
7.430  
7.413  
7.247  
7.206  
7.196  
7.086  
6.979  
6.953  
6.931  
6.905  
6.820  
6.801

3.855

1.819

| Parameter                | Value               |
|--------------------------|---------------------|
| 1 Title                  | XHJ-1-147-H         |
| 2 Origin                 | Bruker BioSpin GmbH |
| 3 Solvent                | CDC13               |
| 4 Temperature            | 298.0               |
| 5 Number of Scans        | 18                  |
| 6 Acquisition Time       | 4.0894              |
| 7 Acquisition Date       | 2022-01-11T15:29:53 |
| 8 Spectrometer Frequency | 400.13              |
| 9 Spectral Width         | 8012.8              |

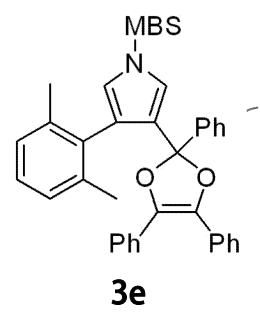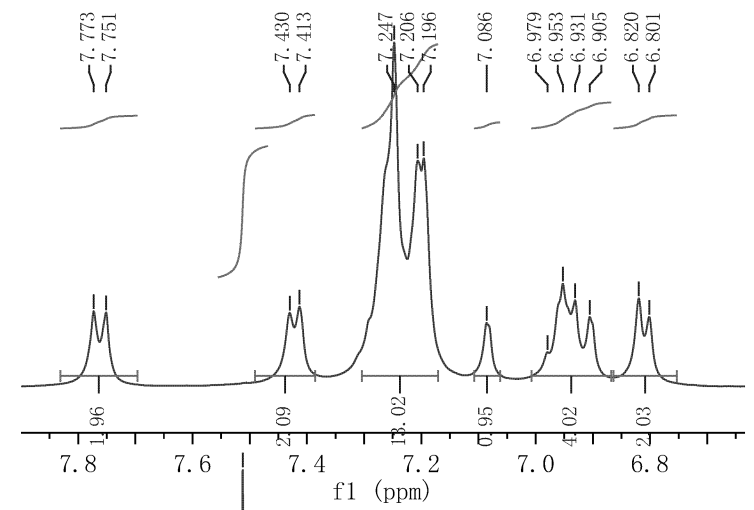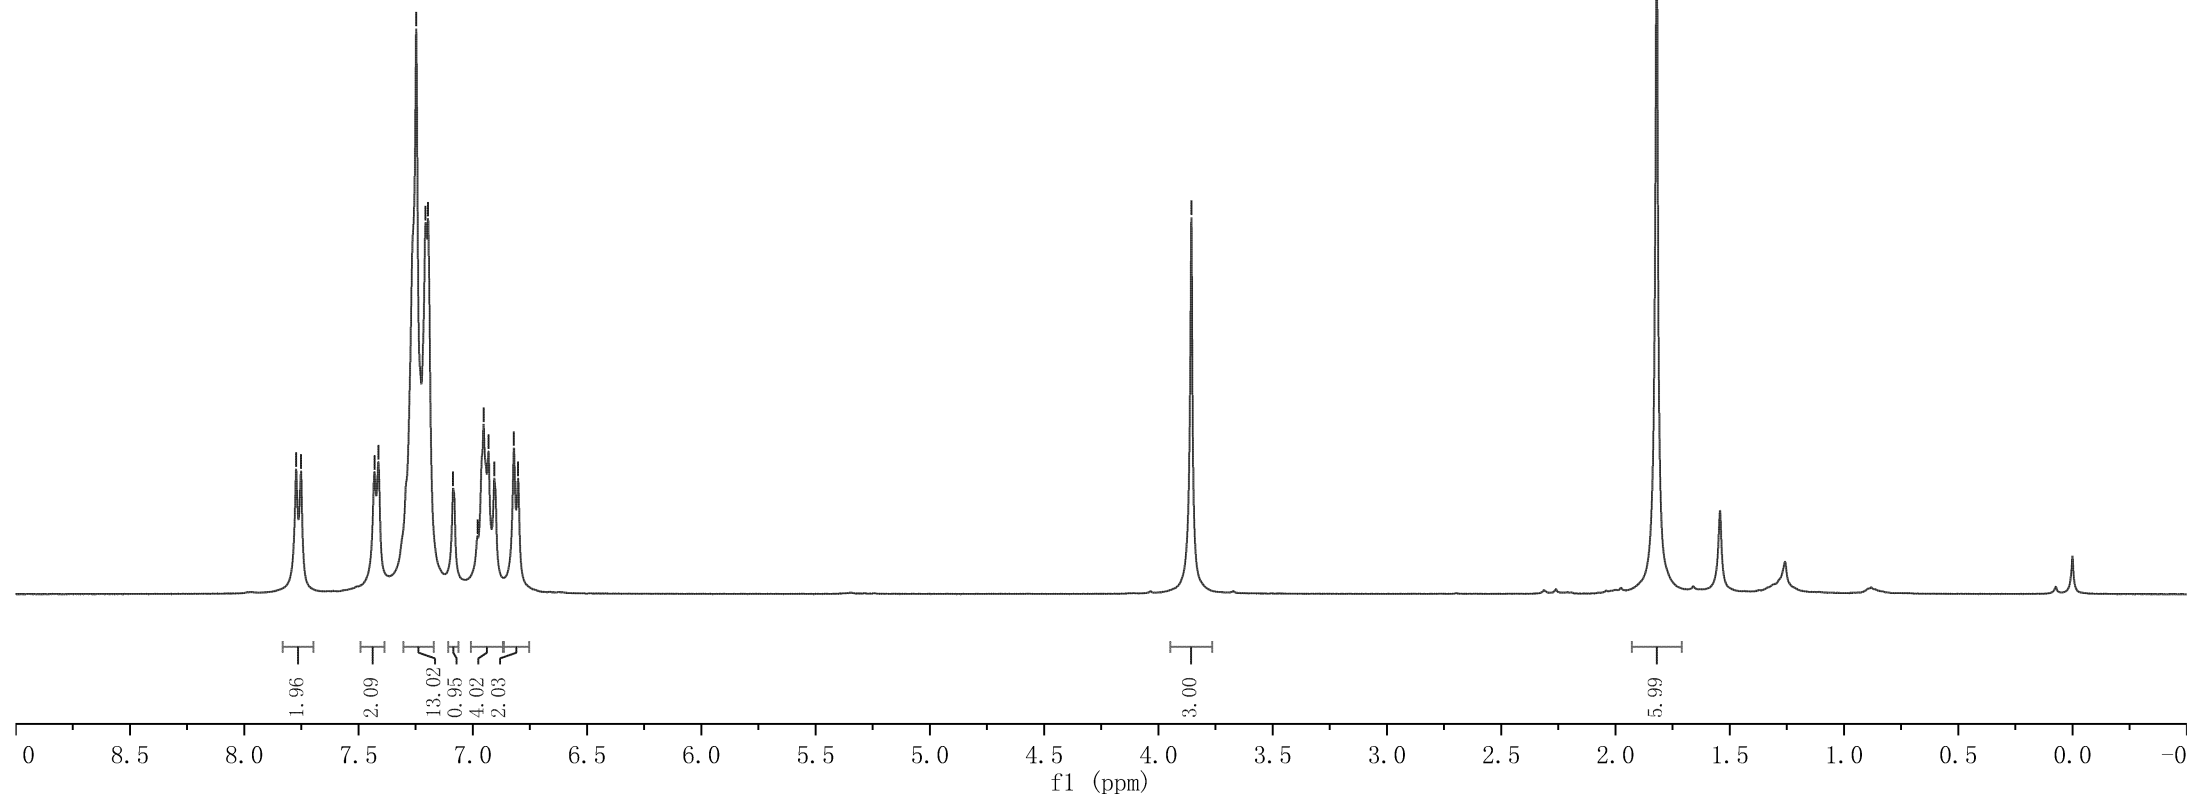

| Parameter                | Value               |
|--------------------------|---------------------|
| 1 Title                  | XHJ-1-147-C         |
| 2 Origin                 |                     |
| 3 Solvent                | CDC13               |
| 4 Temperature            | 297.1               |
| 5 Number of Scans        | 200                 |
| 6 Acquisition Time       | 1.0000              |
| 7 Acquisition Date       | 2022-01-11T15:44:23 |
| 8 Spectrometer Frequency | 100.56              |
| 9 Spectral Width         | 26041.0             |

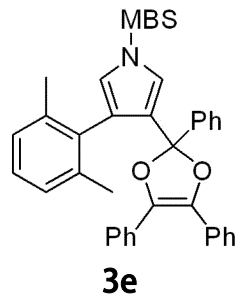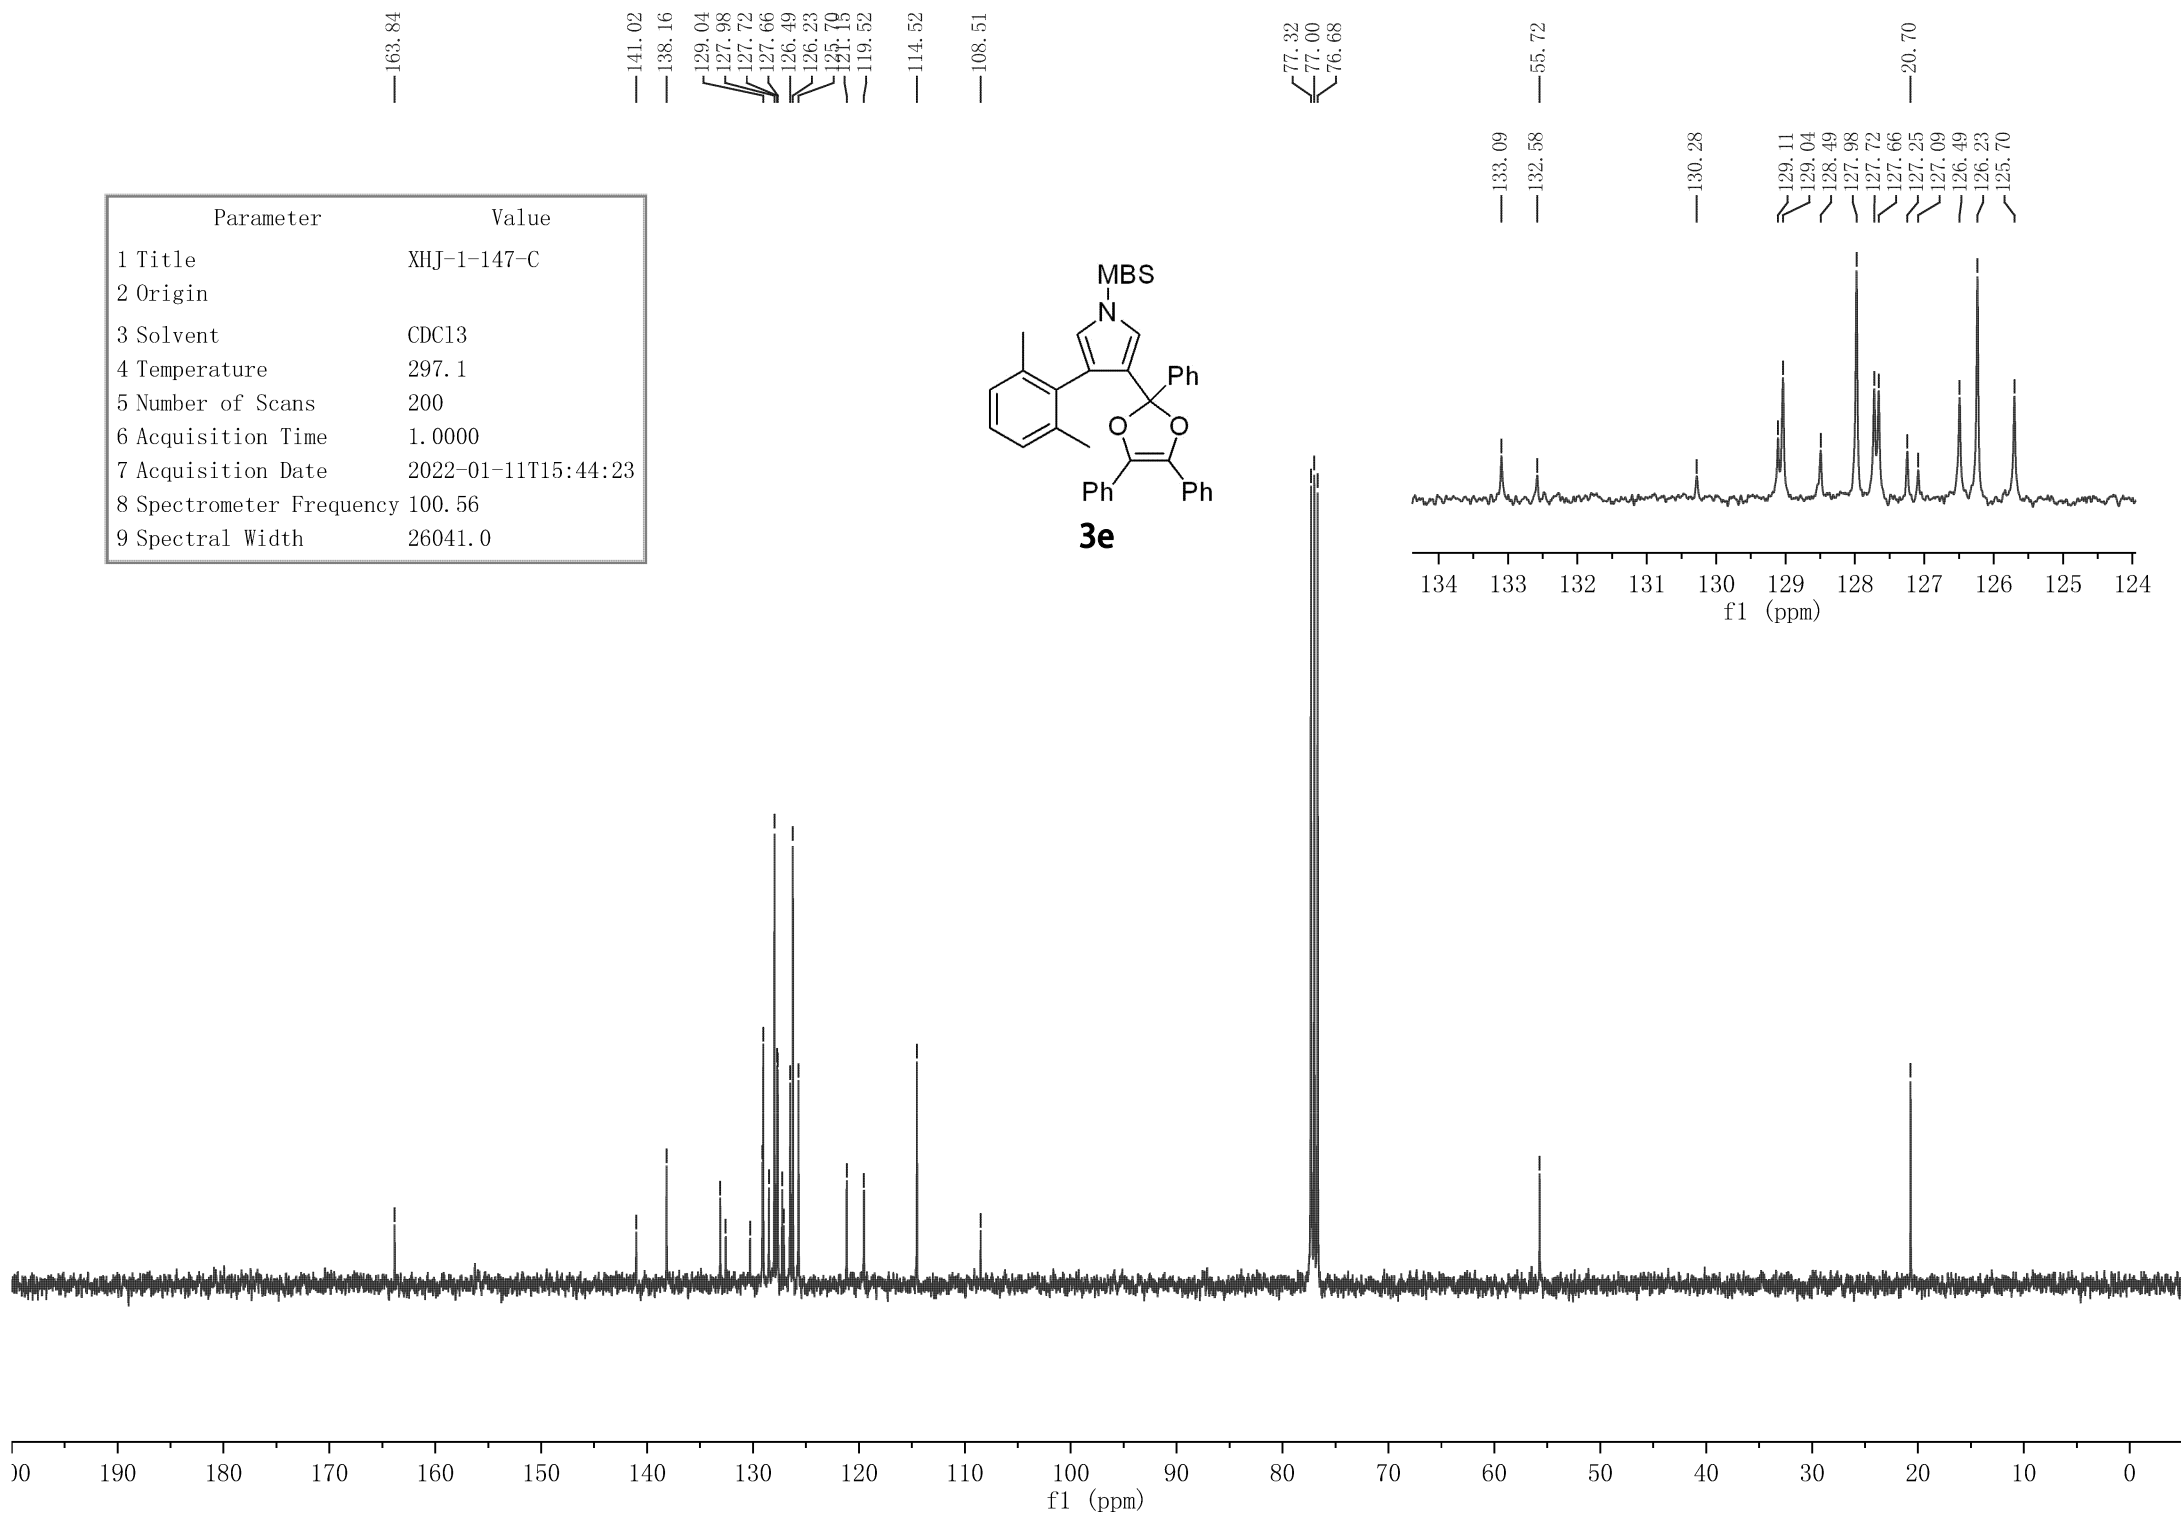





| Parameter                | Value               |
|--------------------------|---------------------|
| 1 Title                  | XHJ-1-139-C         |
| 2 Origin                 |                     |
| 3 Solvent                | CDC13               |
| 4 Temperature            | 297.2               |
| 5 Number of Scans        | 200                 |
| 6 Acquisition Time       | 1.0000              |
| 7 Acquisition Date       | 2022-01-06T21:04:01 |
| 8 Spectrometer Frequency | 100.56              |
| 9 Spectral Width         | 26041.0             |

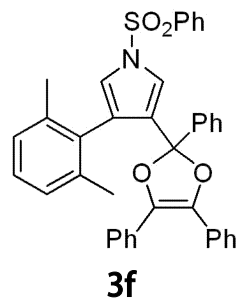

140.93  
138.83  
138.09  
129.34  
127.98  
127.75  
127.68  
126.59  
126.34  
121.55  
119.72  
108.42

77.32  
77.00  
76.68

20.63

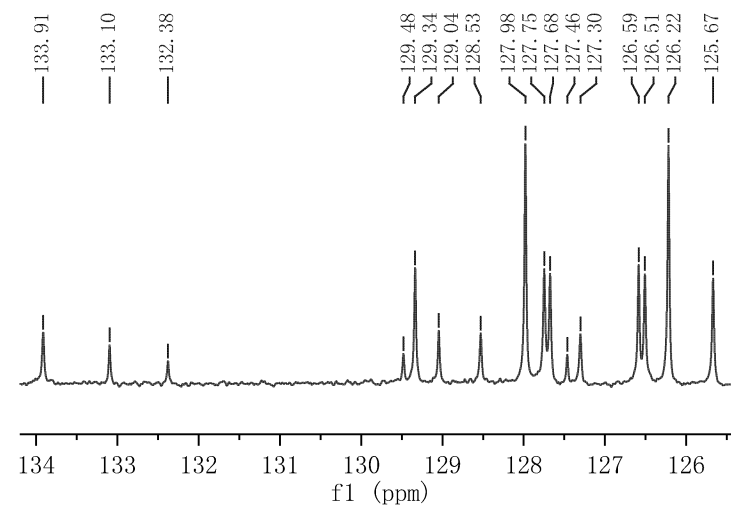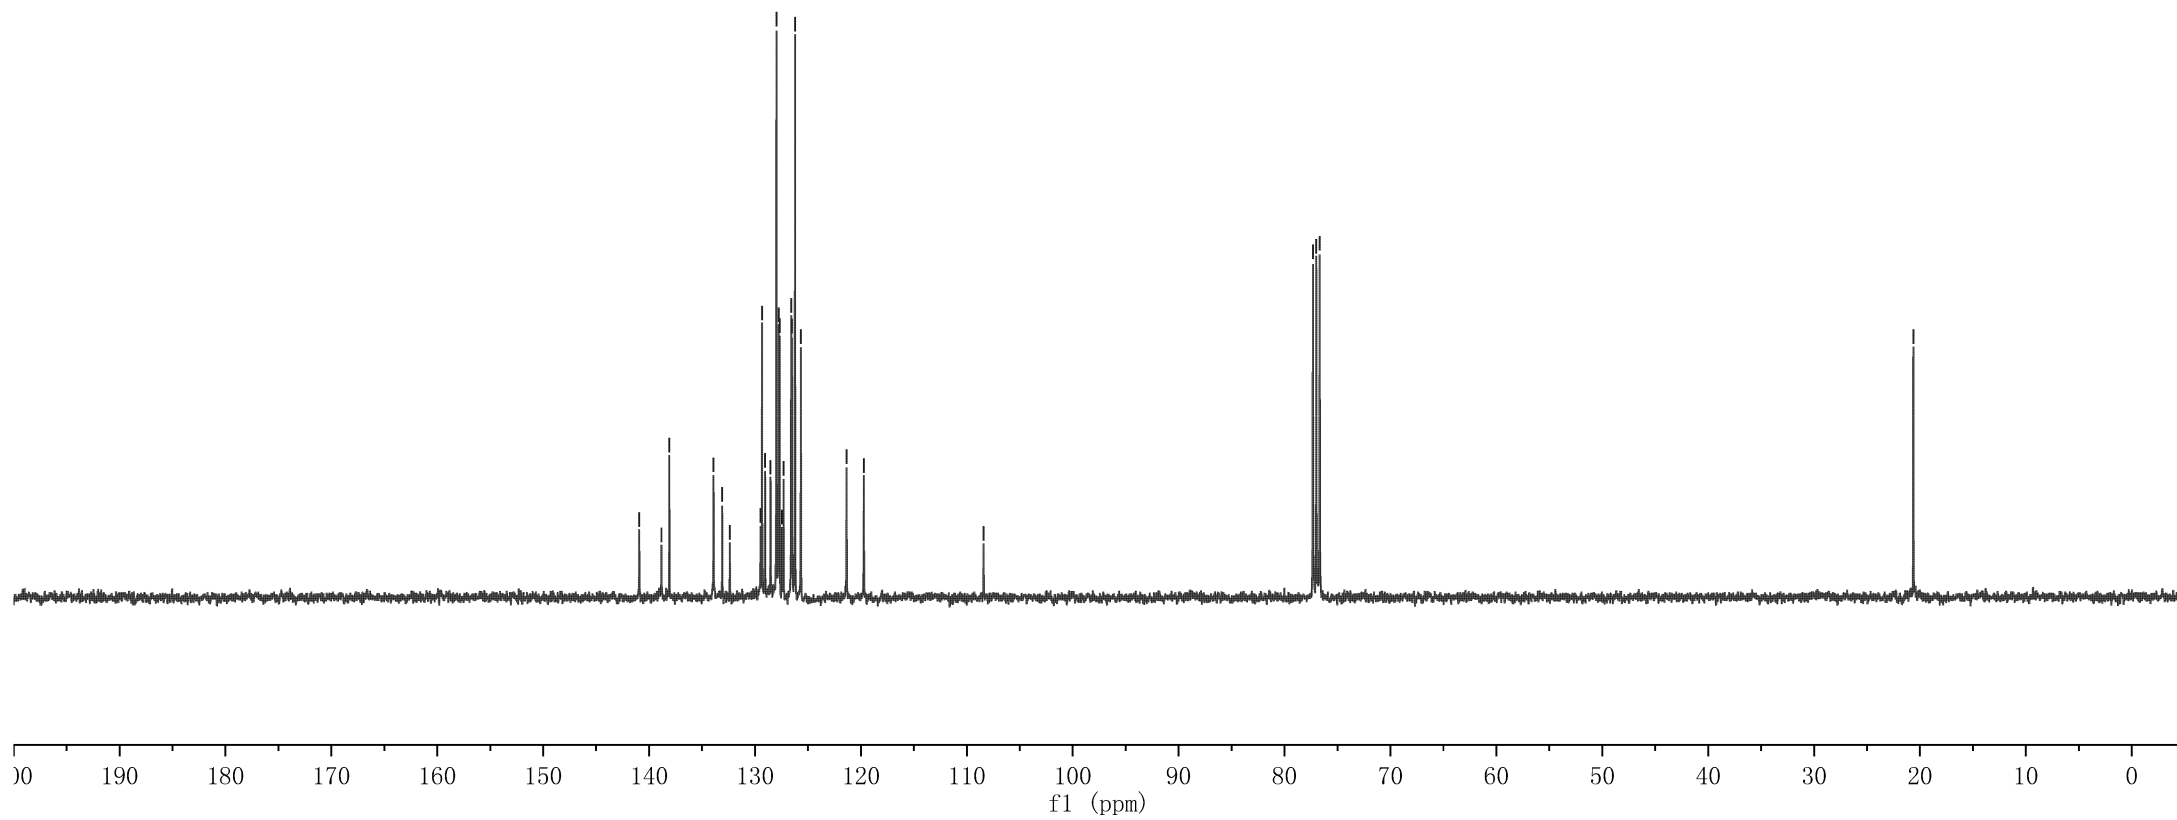

| Parameter                | Value               |
|--------------------------|---------------------|
| 1 Title                  | XHJ-1-185-H         |
| 2 Origin                 |                     |
| 3 Solvent                | CDCl3               |
| 4 Temperature            | 295.4               |
| 5 Number of Scans        | 16                  |
| 6 Acquisition Time       | 4.0002              |
| 7 Acquisition Date       | 2022-02-22T17:00:03 |
| 8 Spectrometer Frequency | 399.93              |
| 9 Spectral Width         | 8012.0              |

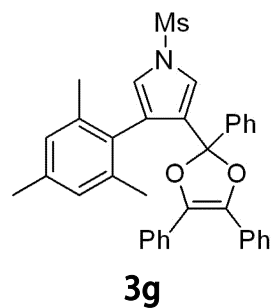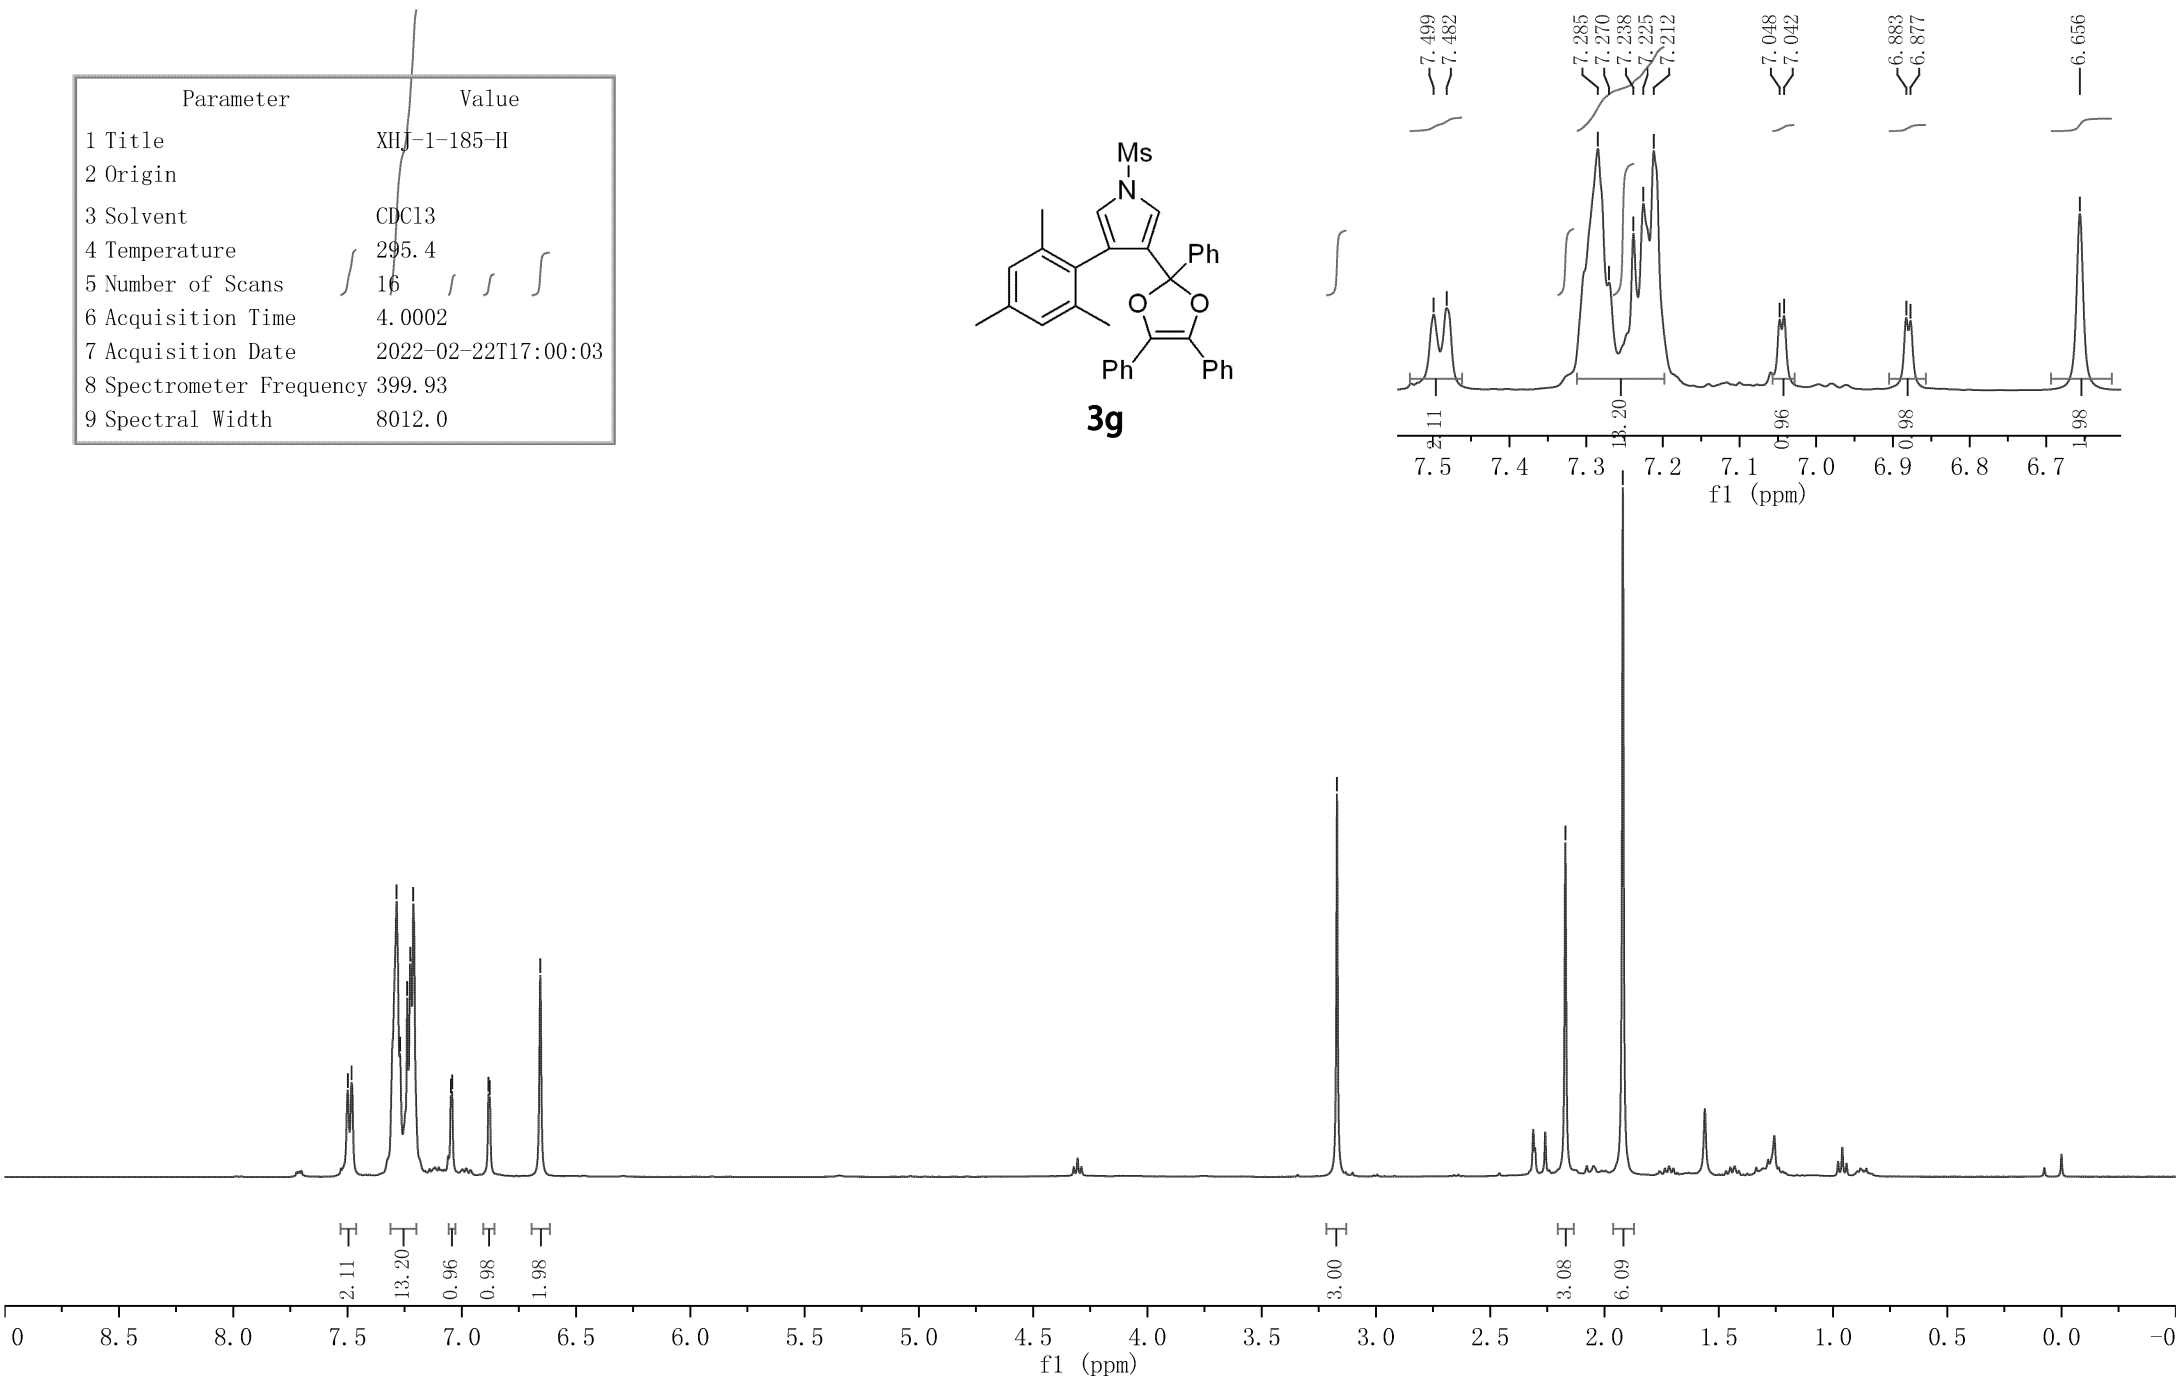

| Parameter                | Value               |
|--------------------------|---------------------|
| 1 Title                  | XHJ-1-185-C         |
| 2 Origin                 |                     |
| 3 Solvent                | CDC13               |
| 4 Temperature            | 295.5               |
| 5 Number of Scans        | 400                 |
| 6 Acquisition Time       | 1.0000              |
| 7 Acquisition Date       | 2022-02-22T17:15:32 |
| 8 Spectrometer Frequency | 100.56              |
| 9 Spectral Width         | 26041.0             |

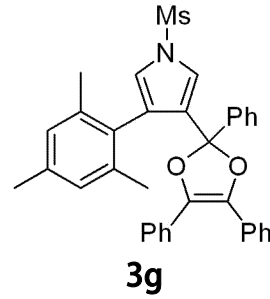

141.13  
137.92  
136.76  
133.08  
129.41  
129.09  
128.55  
127.96  
127.73  
127.37  
127.07  
126.21  
125.67  
120.72  
119.11

108.45

77.32  
77.00  
76.68

42.84

20.97  
20.74

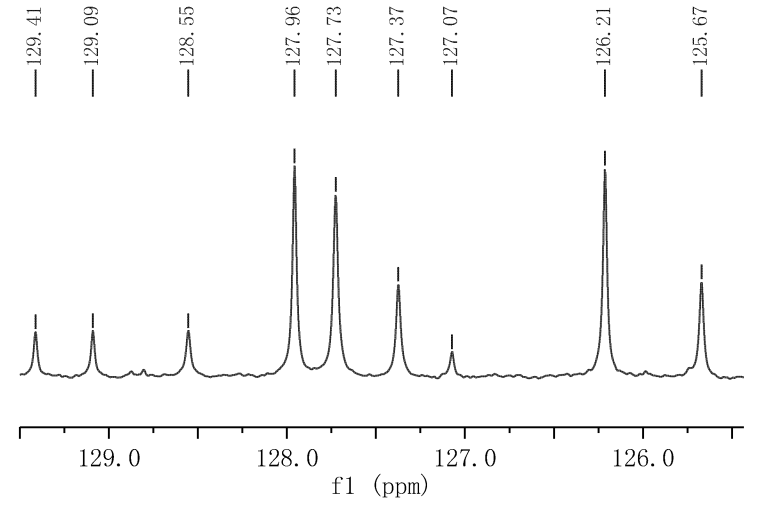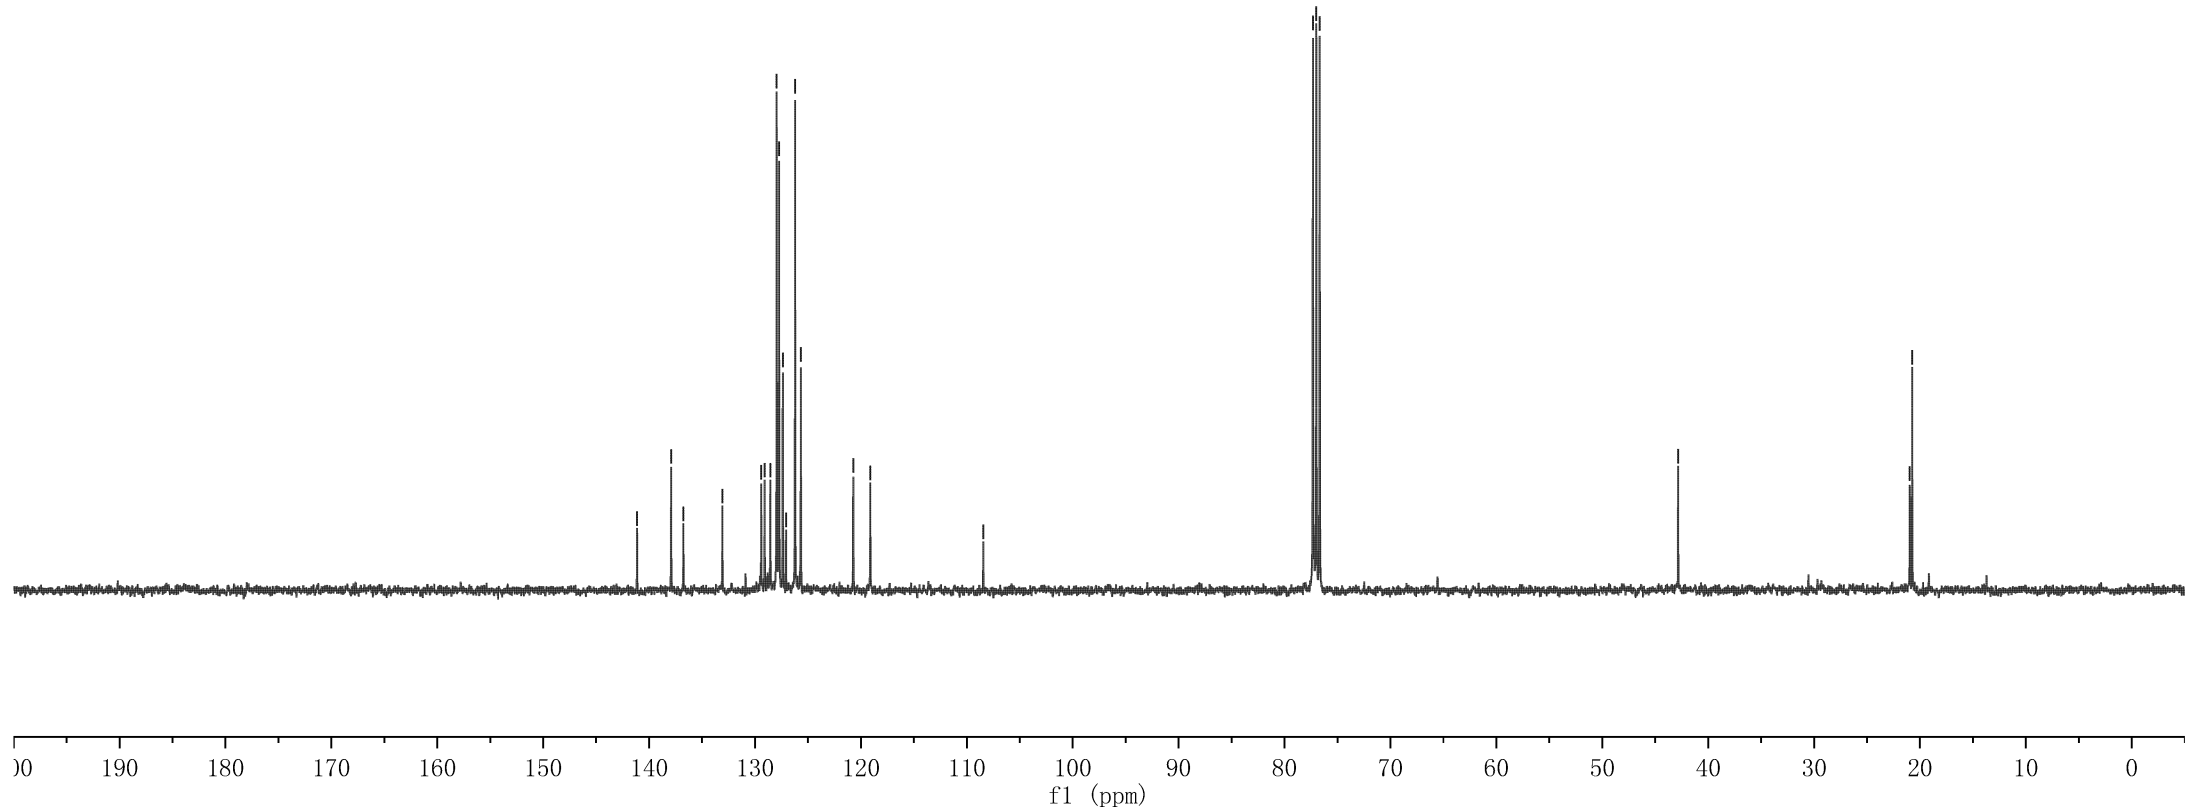

7.499  
7.483  
7.317  
7.300  
7.282  
7.258  
7.234  
7.221  
7.070  
7.064  
6.896  
6.890  
6.561  
6.537

3.174

1.936

| Parameter                | Value               |
|--------------------------|---------------------|
| 1 Title                  | XHJ-1-232-H         |
| 2 Origin                 | Bruker BioSpin GmbH |
| 3 Solvent                | CDC13               |
| 4 Temperature            | 298.0               |
| 5 Number of Scans        | 17                  |
| 6 Acquisition Time       | 4.0894              |
| 7 Acquisition Date       | 2022-03-15T15:37:06 |
| 8 Spectrometer Frequency | 400.13              |
| 9 Spectral Width         | 8012.8              |

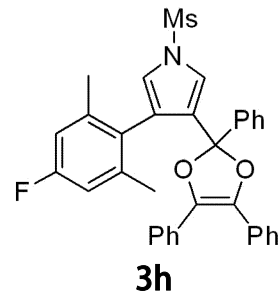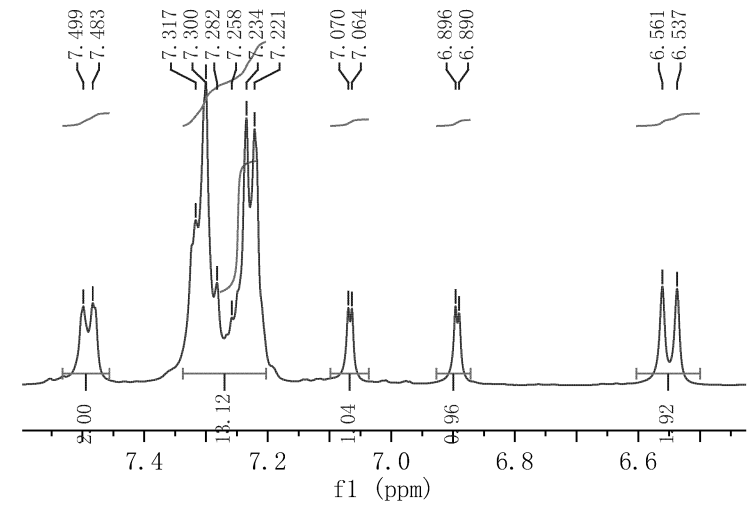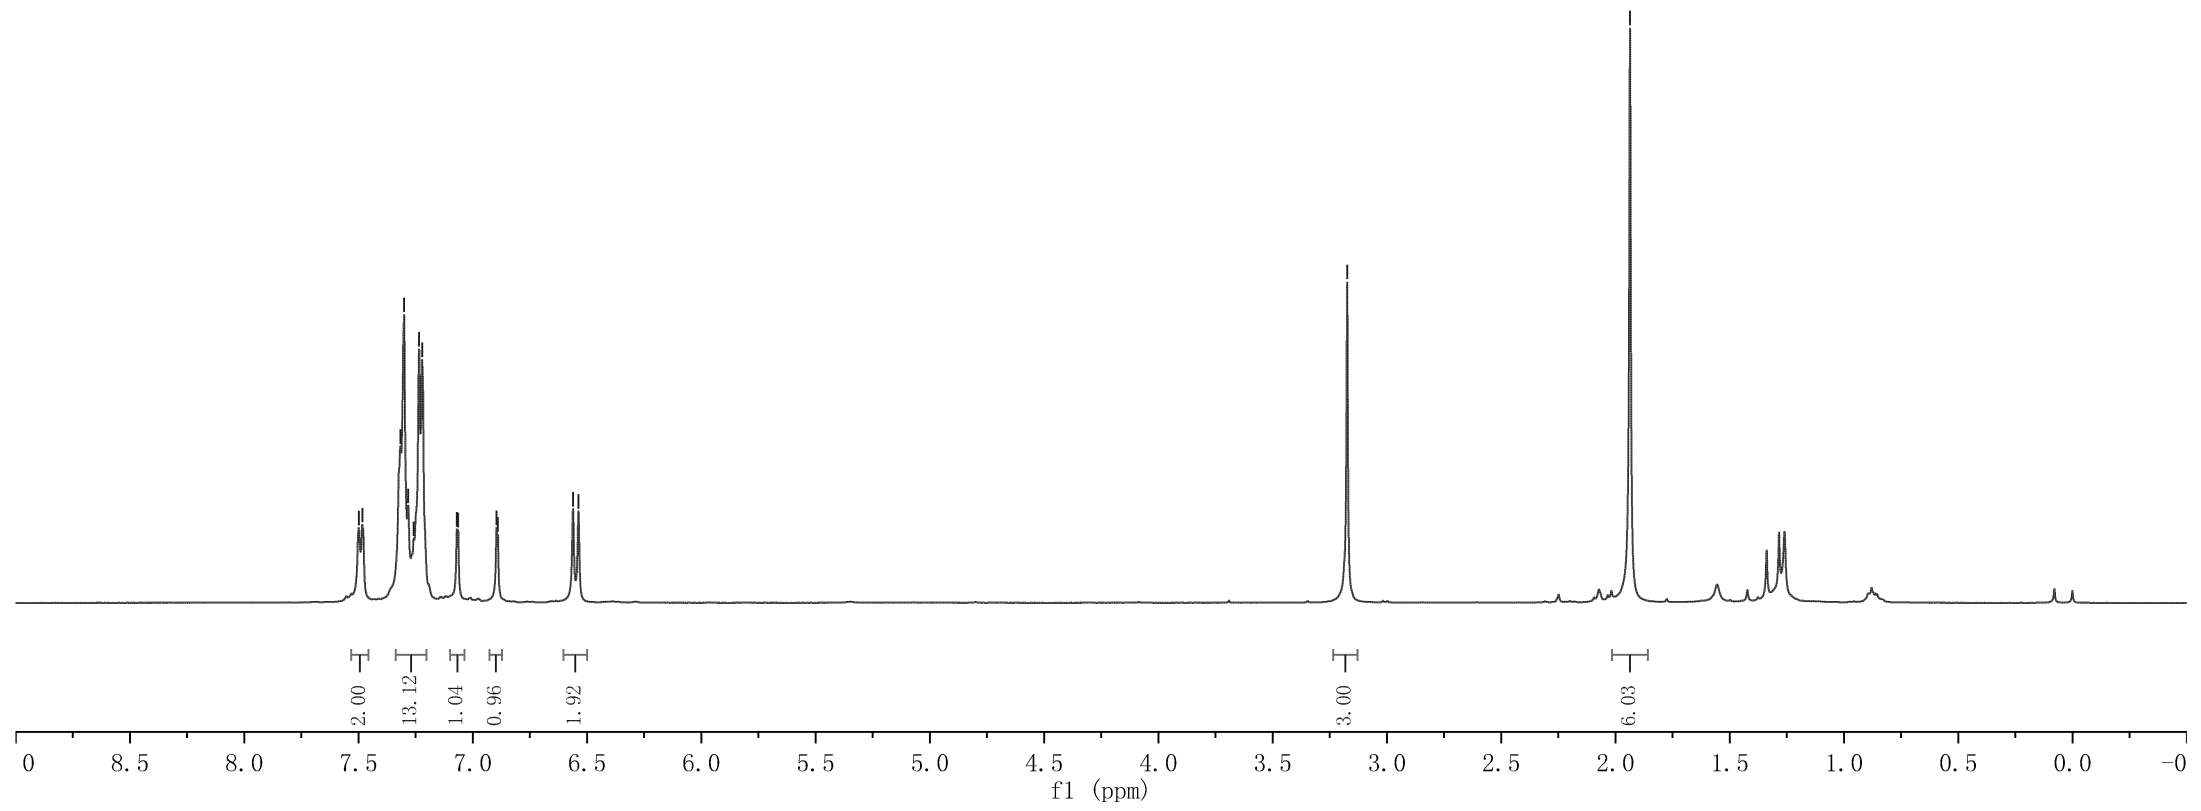

| Parameter                | Value               |
|--------------------------|---------------------|
| 1 Title                  | XHJ-1-232-C         |
| 2 Origin                 |                     |
| 3 Solvent                | CDC13               |
| 4 Temperature            | 297.8               |
| 5 Number of Scans        | 250                 |
| 6 Acquisition Time       | 1.0000              |
| 7 Acquisition Date       | 2022-03-15T19:37:55 |
| 8 Spectrometer Frequency | 100.56              |
| 9 Spectral Width         | 26041.0             |

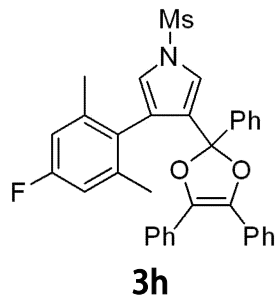

163.13  
160.69

140.92  
140.57  
140.49  
128.95  
128.68  
128.08  
127.89  
127.80  
126.13  
120.84  
119.36  
113.21  
113.00  
108.32

77.32  
77.00  
76.68

42.87

20.97

140.92  
140.57  
140.49

133.10

129.26  
128.95  
128.68  
128.08  
127.89  
127.80  
126.13  
125.64

120.84  
119.36

113.21  
113.00

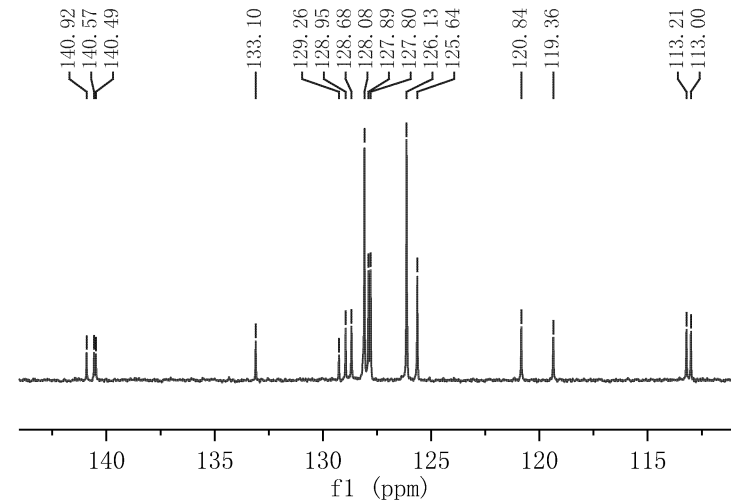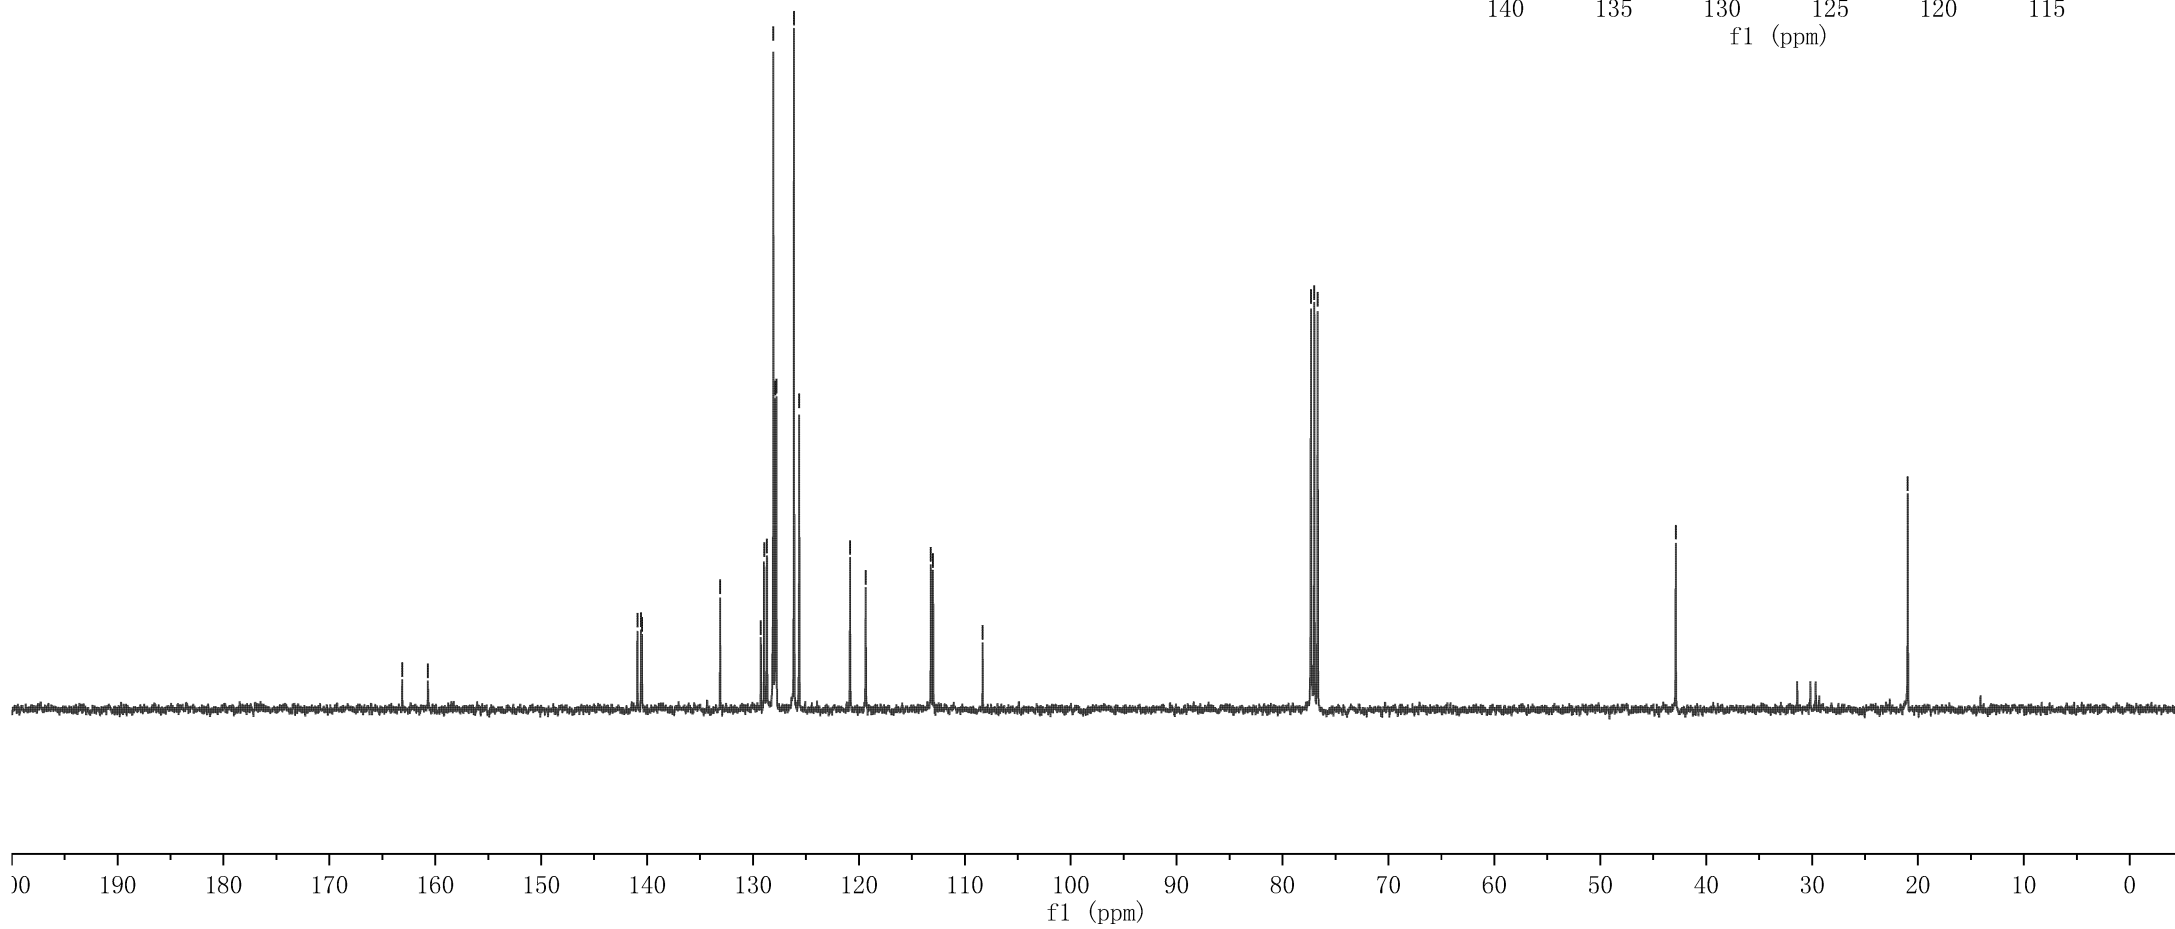

| Parameter                | Value               |
|--------------------------|---------------------|
| 1 Title                  | XHJ-1-232-F         |
| 2 Origin                 | Bruker BioSpin GmbH |
| 3 Solvent                | CDC13               |
| 4 Temperature            | 297.1               |
| 5 Number of Scans        | 16                  |
| 6 Acquisition Time       | 0.7340              |
| 7 Acquisition Date       | 2022-08-16T20:07:25 |
| 8 Spectrometer Frequency | 376.31              |
| 9 Spectral Width         | 89285.7             |

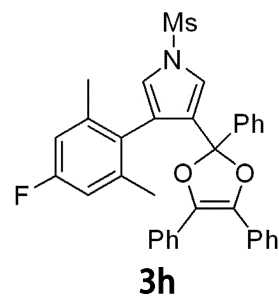

-116.60

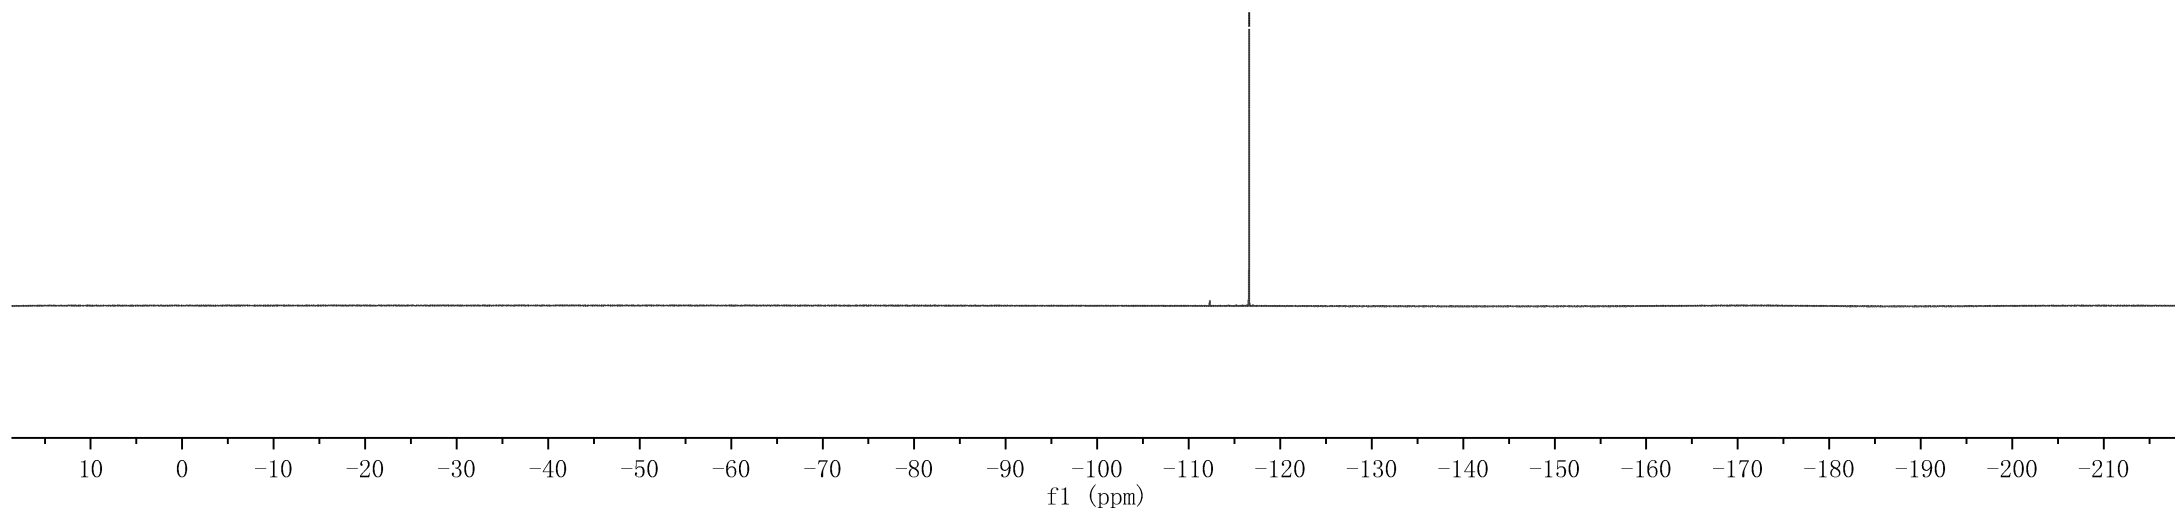

7.567  
7.564  
7.549  
7.544  
7.359  
7.337  
7.333  
7.303  
7.298  
7.290  
7.286  
7.282  
7.275  
7.272  
7.093  
7.087  
6.942  
6.935  
6.866

| Parameter                | Value               |
|--------------------------|---------------------|
| 1 Title                  | XIJ-1-224-II        |
| 2 Origin                 | Bruker BioSpin GmbH |
| 3 Solvent                | CDCl3               |
| 4 Temperature            | 298.0               |
| 5 Number of Scans        | 13                  |
| 6 Acquisition Time       | 4.0894              |
| 7 Acquisition Date       | 2022-03-11T22:33:28 |
| 8 Spectrometer Frequency | 400.13              |
| 9 Spectral Width         | 8012.8              |

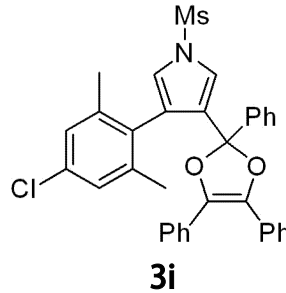

3.225

1.984

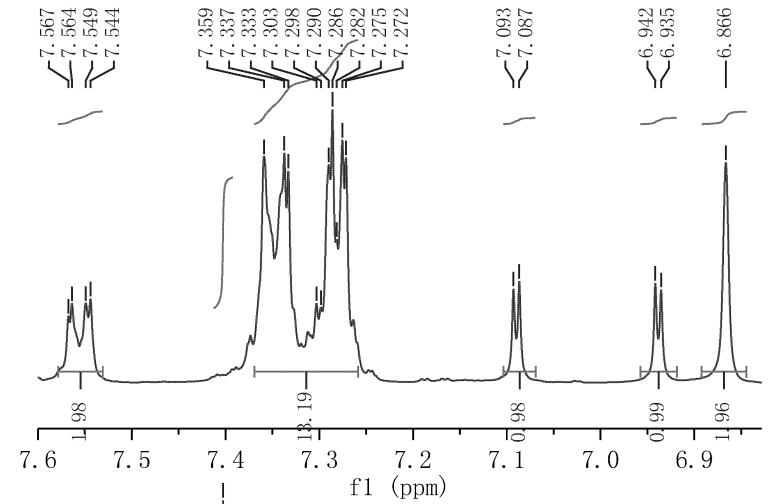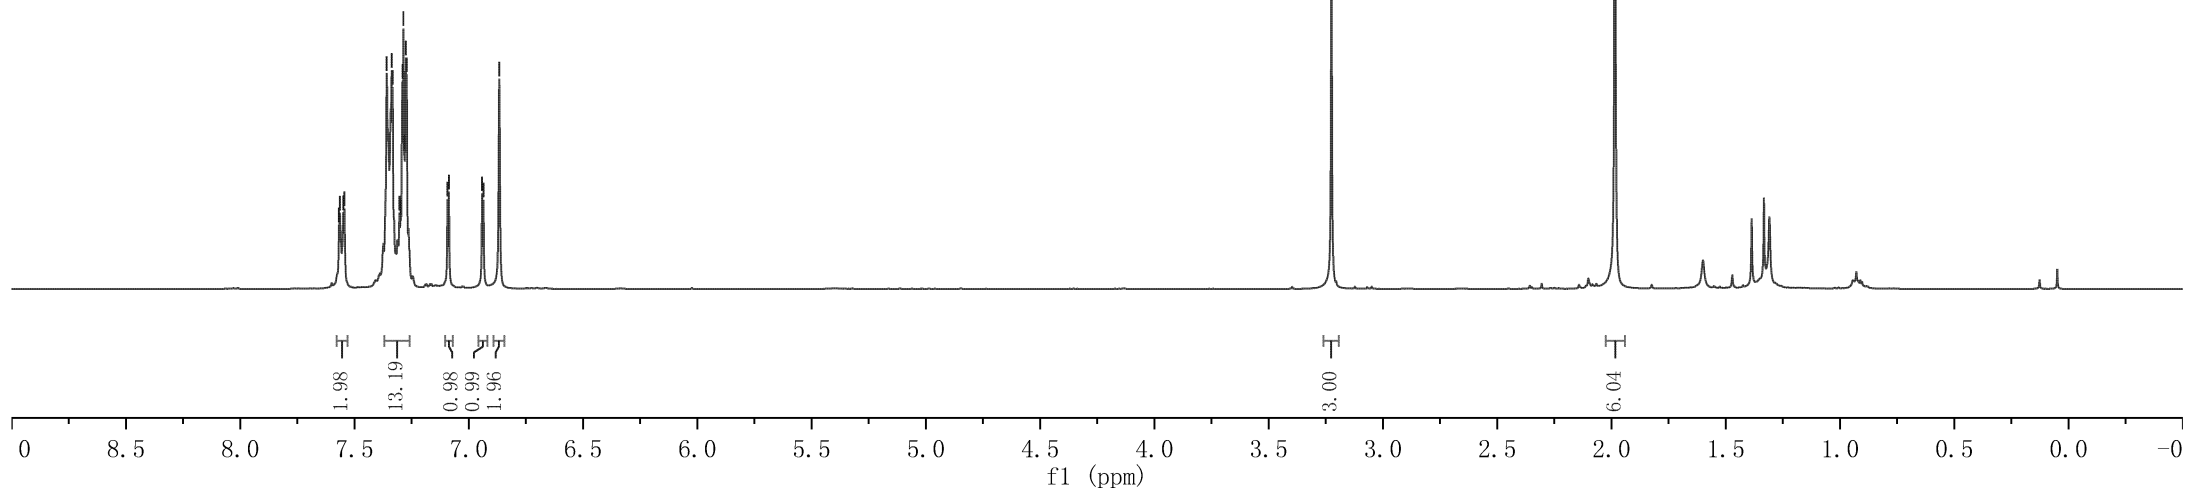

| Parameter                | Value               |
|--------------------------|---------------------|
| 1 Title                  | XHJ-1-224-C         |
| 2 Origin                 |                     |
| 3 Solvent                | CDC13               |
| 4 Temperature            | 296.8               |
| 5 Number of Scans        | 250                 |
| 6 Acquisition Time       | 1.0000              |
| 7 Acquisition Date       | 2022-03-12T02:05:30 |
| 8 Spectrometer Frequency | 100.56              |
| 9 Spectral Width         | 26041.0             |

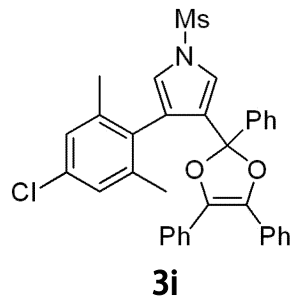

140.88  
140.09  
128.87  
128.09  
127.90  
127.83  
126.42  
126.13  
125.63  
119.08  
108.26

77.32  
77.00  
76.68

42.90

20.75

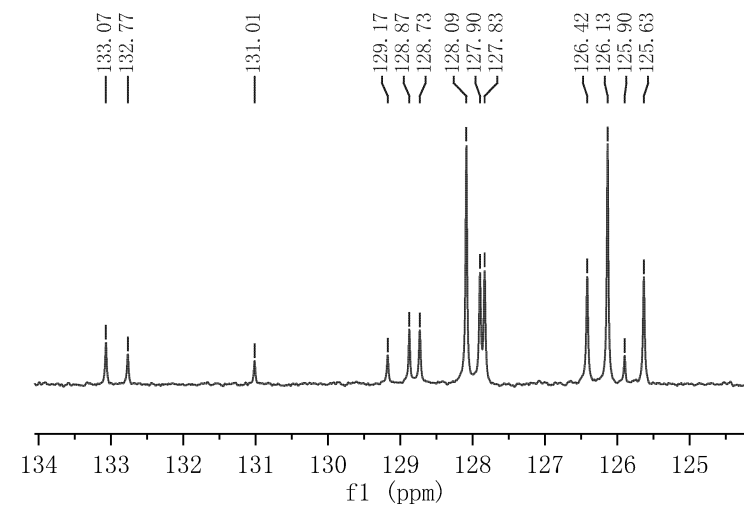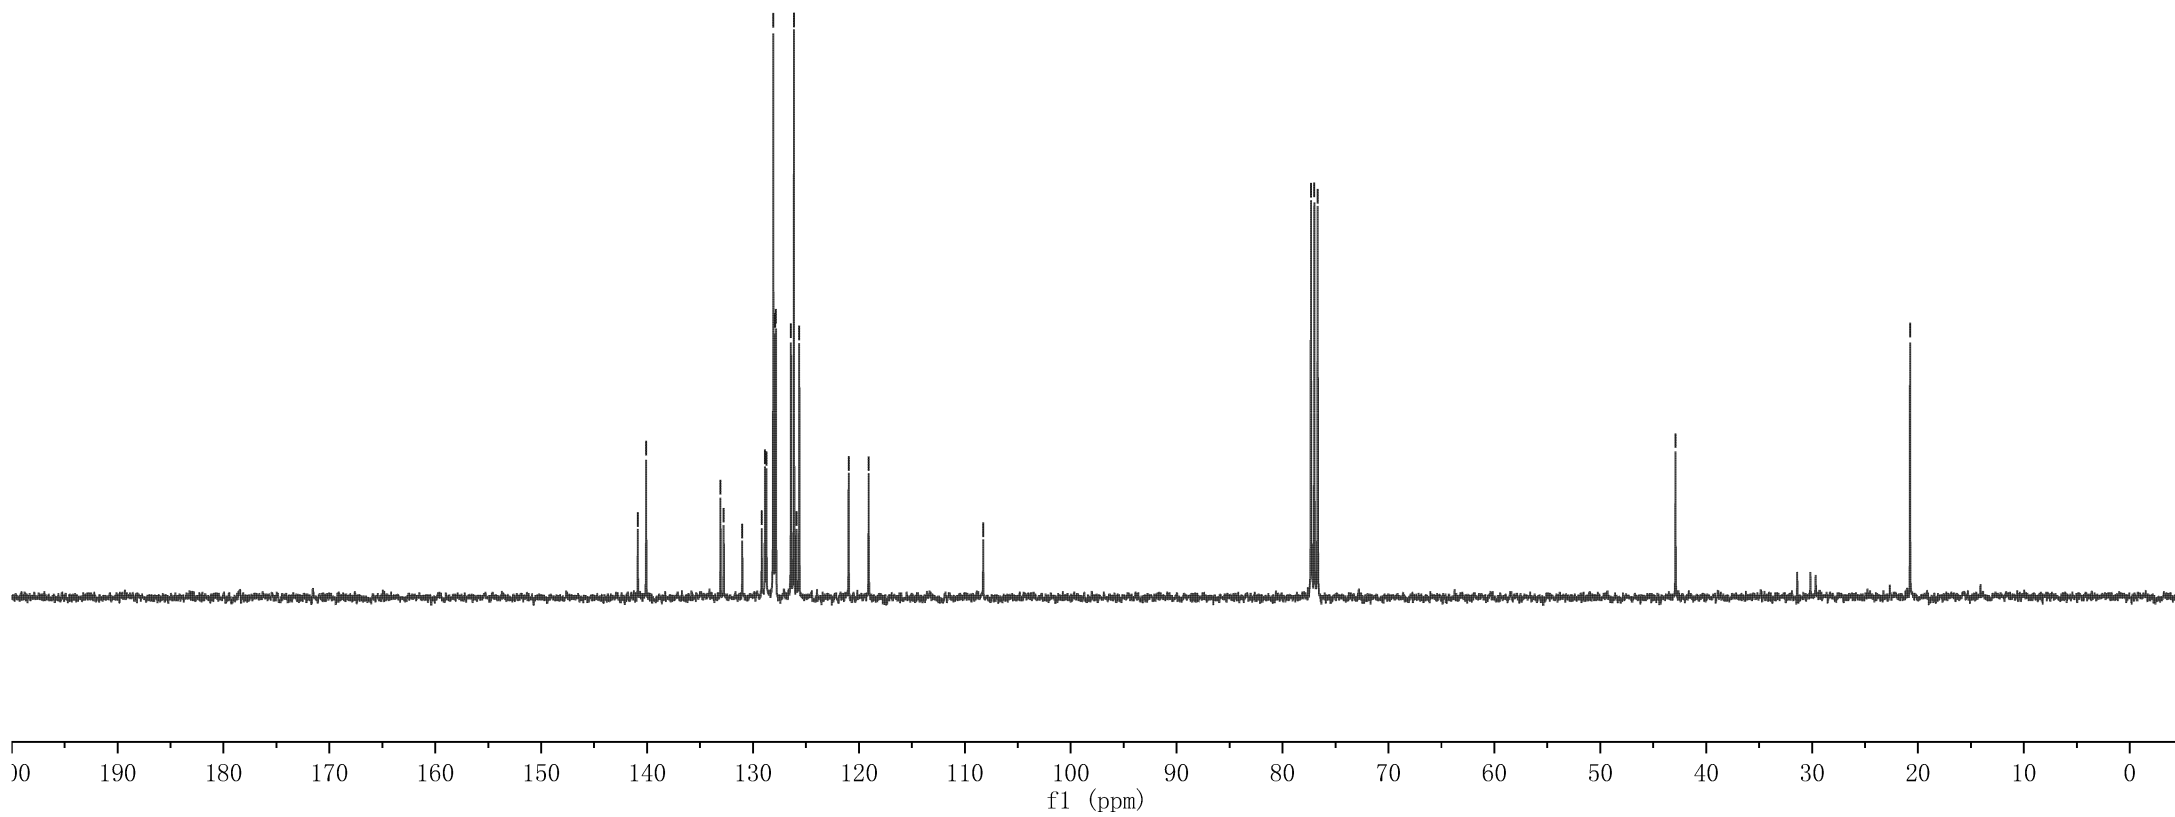



7.524  
7.521  
7.506  
7.501  
7.327  
7.314  
7.307  
7.299  
7.296  
7.291  
7.286  
7.282  
7.245  
7.236  
7.229  
7.226  
7.216  
7.032  
7.026  
6.972  
6.892  
6.886

| Parameter                | Value               |
|--------------------------|---------------------|
| 1 Title                  | XHJ-1-221-H-2       |
| 2 Origin                 | Bruker BioSpin GmbH |
| 3 Solvent                | CDC13               |
| 4 Temperature            | 298.0               |
| 5 Number of Scans        | 10                  |
| 6 Acquisition Time       | 4.0894              |
| 7 Acquisition Date       | 2022-03-10T20:18:15 |
| 8 Spectrometer Frequency | 400.13              |
| 9 Spectral Width         | 8012.8              |

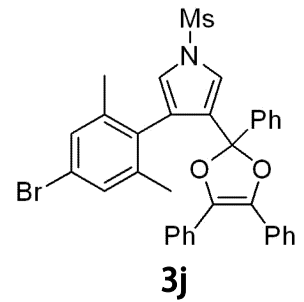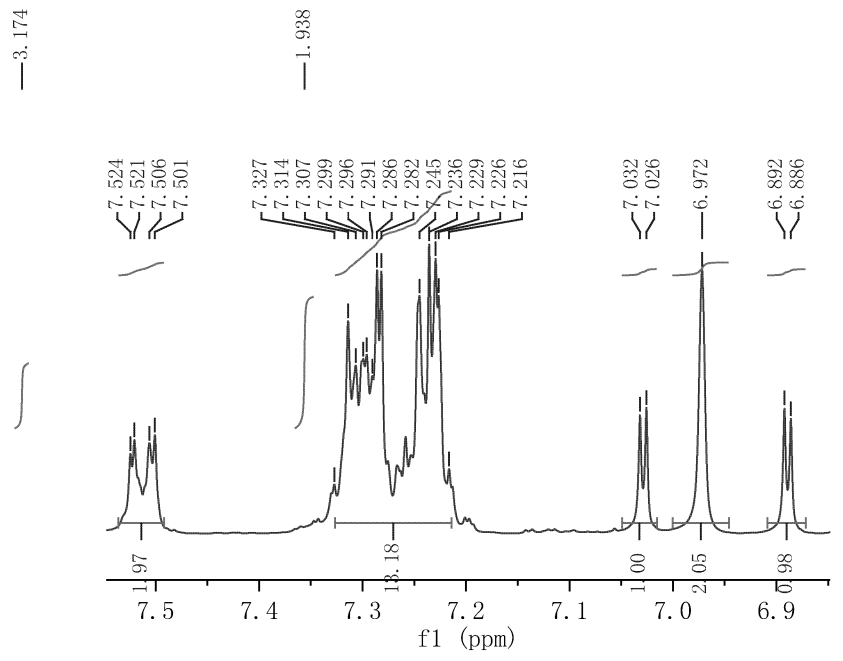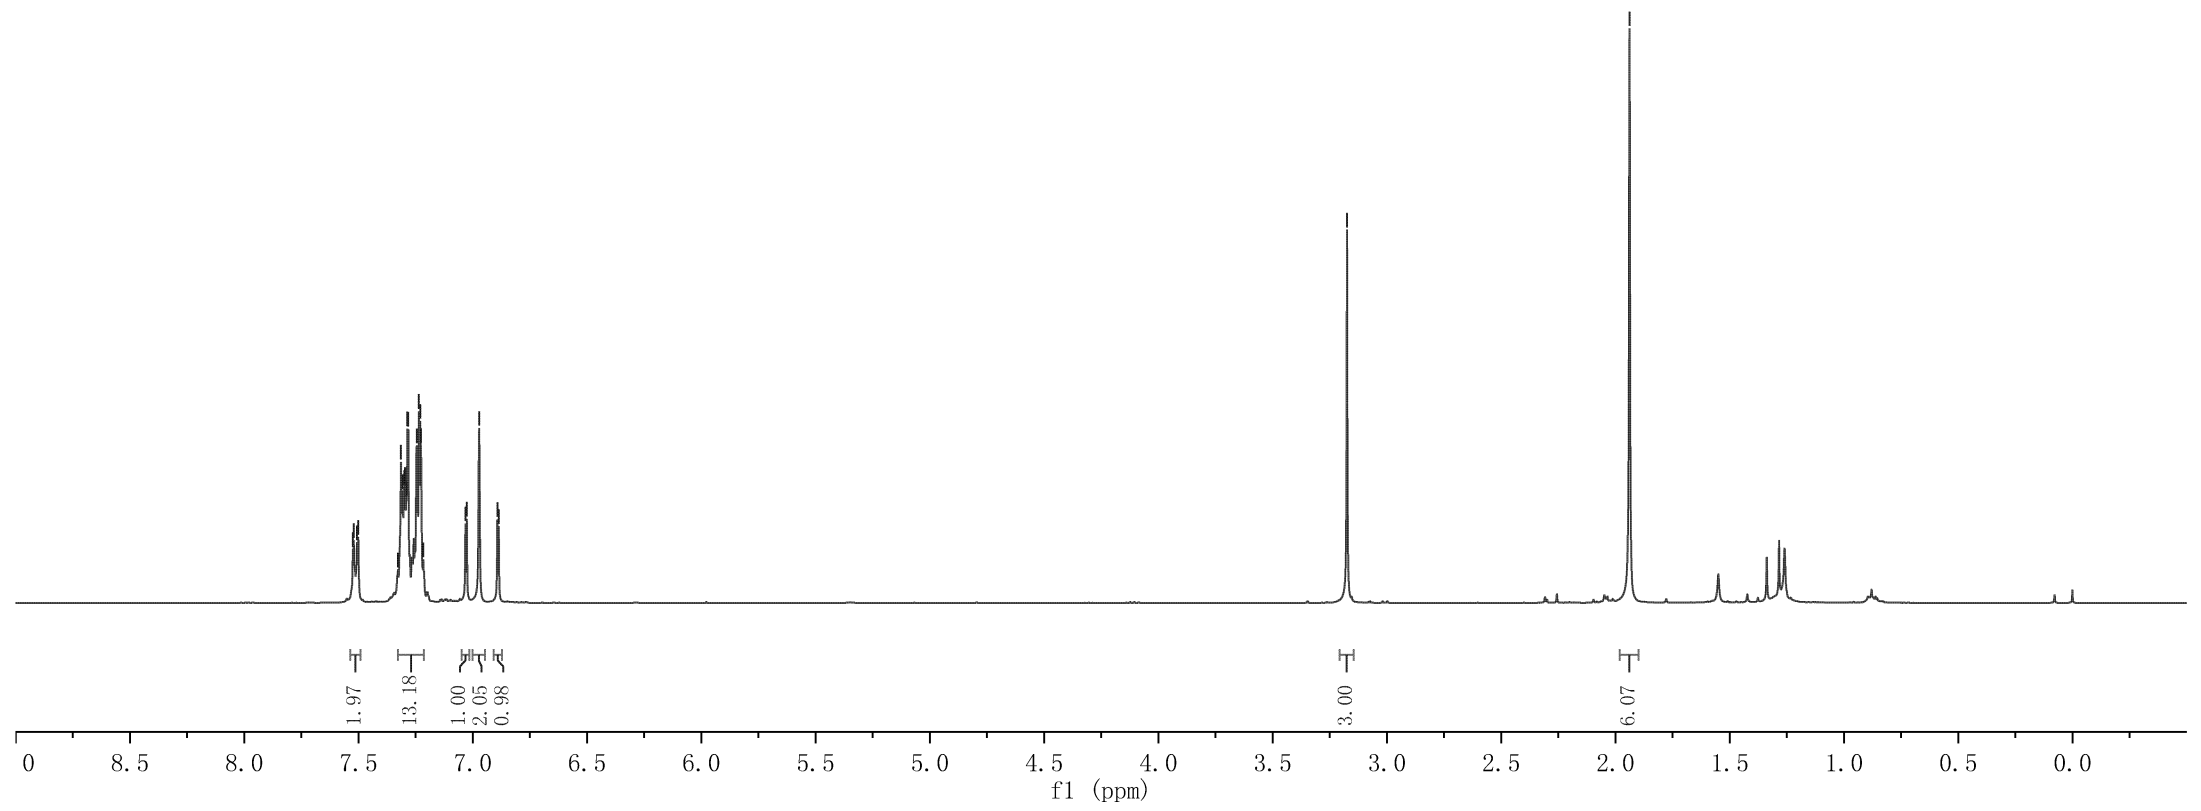

| Parameter                | Value               |
|--------------------------|---------------------|
| 1 Title                  | XHJ-1-221-C         |
| 2 Origin                 |                     |
| 3 Solvent                | CDC13               |
| 4 Temperature            | 295.5               |
| 5 Number of Scans        | 400                 |
| 6 Acquisition Time       | 1.0000              |
| 7 Acquisition Date       | 2022-03-10T11:13:17 |
| 8 Spectrometer Frequency | 100.56              |
| 9 Spectral Width         | 26041.0             |

140.97  
140.49  
129.43  
128.95  
128.19  
128.00  
127.94  
126.24  
125.31  
121.11  
119.07  
108.35

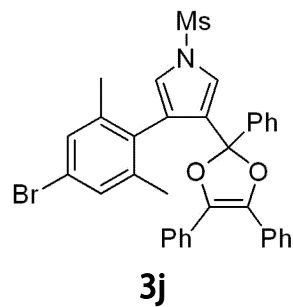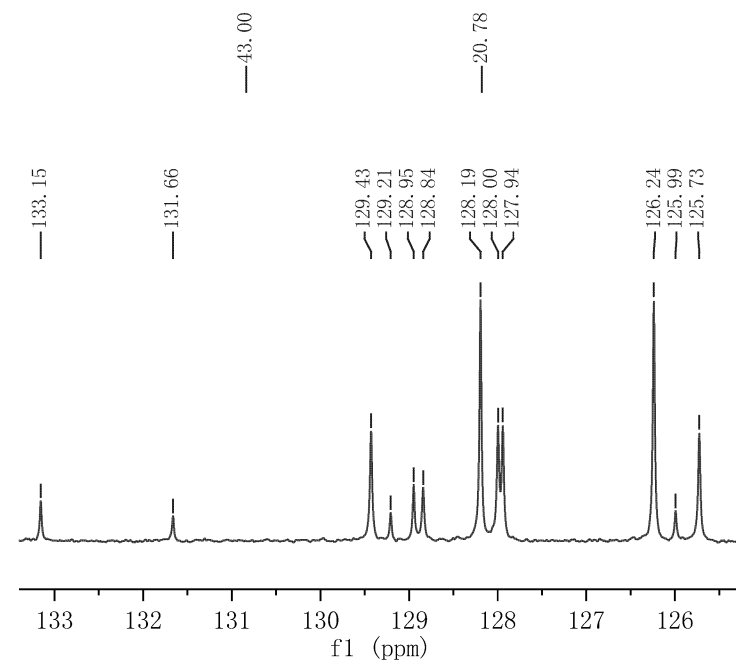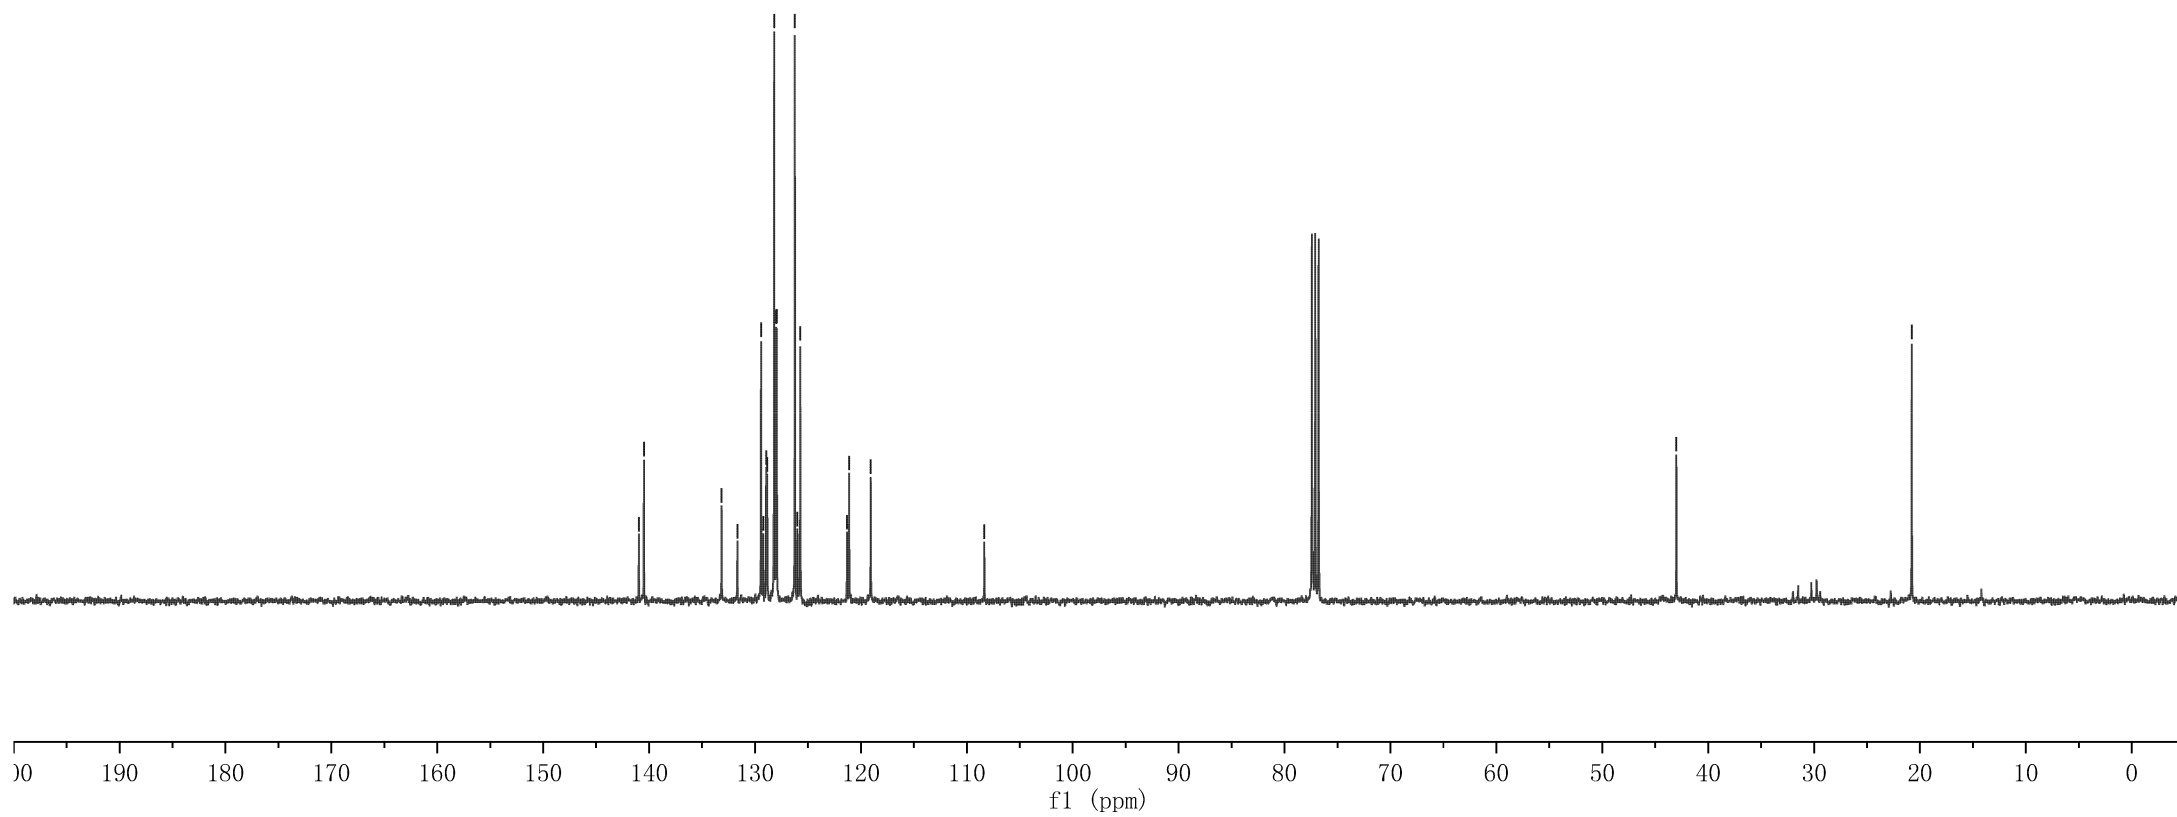

7.558  
7.553  
7.545  
7.541  
7.534  
7.348  
7.343  
7.328  
7.324  
7.303  
7.298  
7.293  
7.285  
7.257  
7.248  
7.235  
7.228  
7.218  
7.206  
7.120  
7.114  
7.092  
7.088  
7.073  
7.070  
7.054  
7.050  
7.017  
7.011  
7.004  
7.001  
6.985  
6.982  
6.966  
6.963

| Parameter                | Value               |
|--------------------------|---------------------|
| 1 Title                  | XHJ-2-124-2-H       |
| 2 Origin                 | Bruker BioSpin GmbH |
| 3 Solvent                | CDC13               |
| 4 Temperature            | 298.0               |
| 5 Number of Scans        | 10 // //            |
| 6 Acquisition Time       | 4.0894              |
| 7 Acquisition Date       | 2022-06-22T15:44:05 |
| 8 Spectrometer Frequency | 400.13              |
| 9 Spectral Width         | 8012.8              |

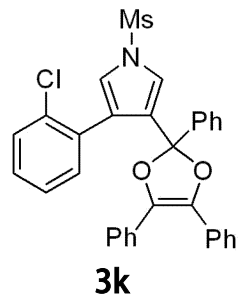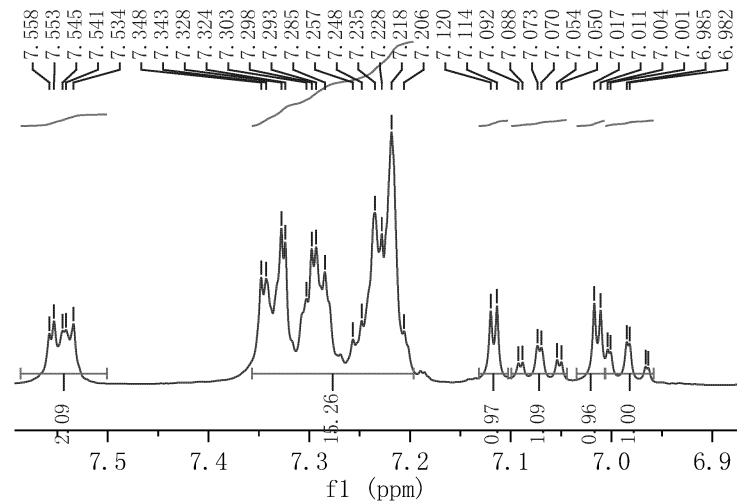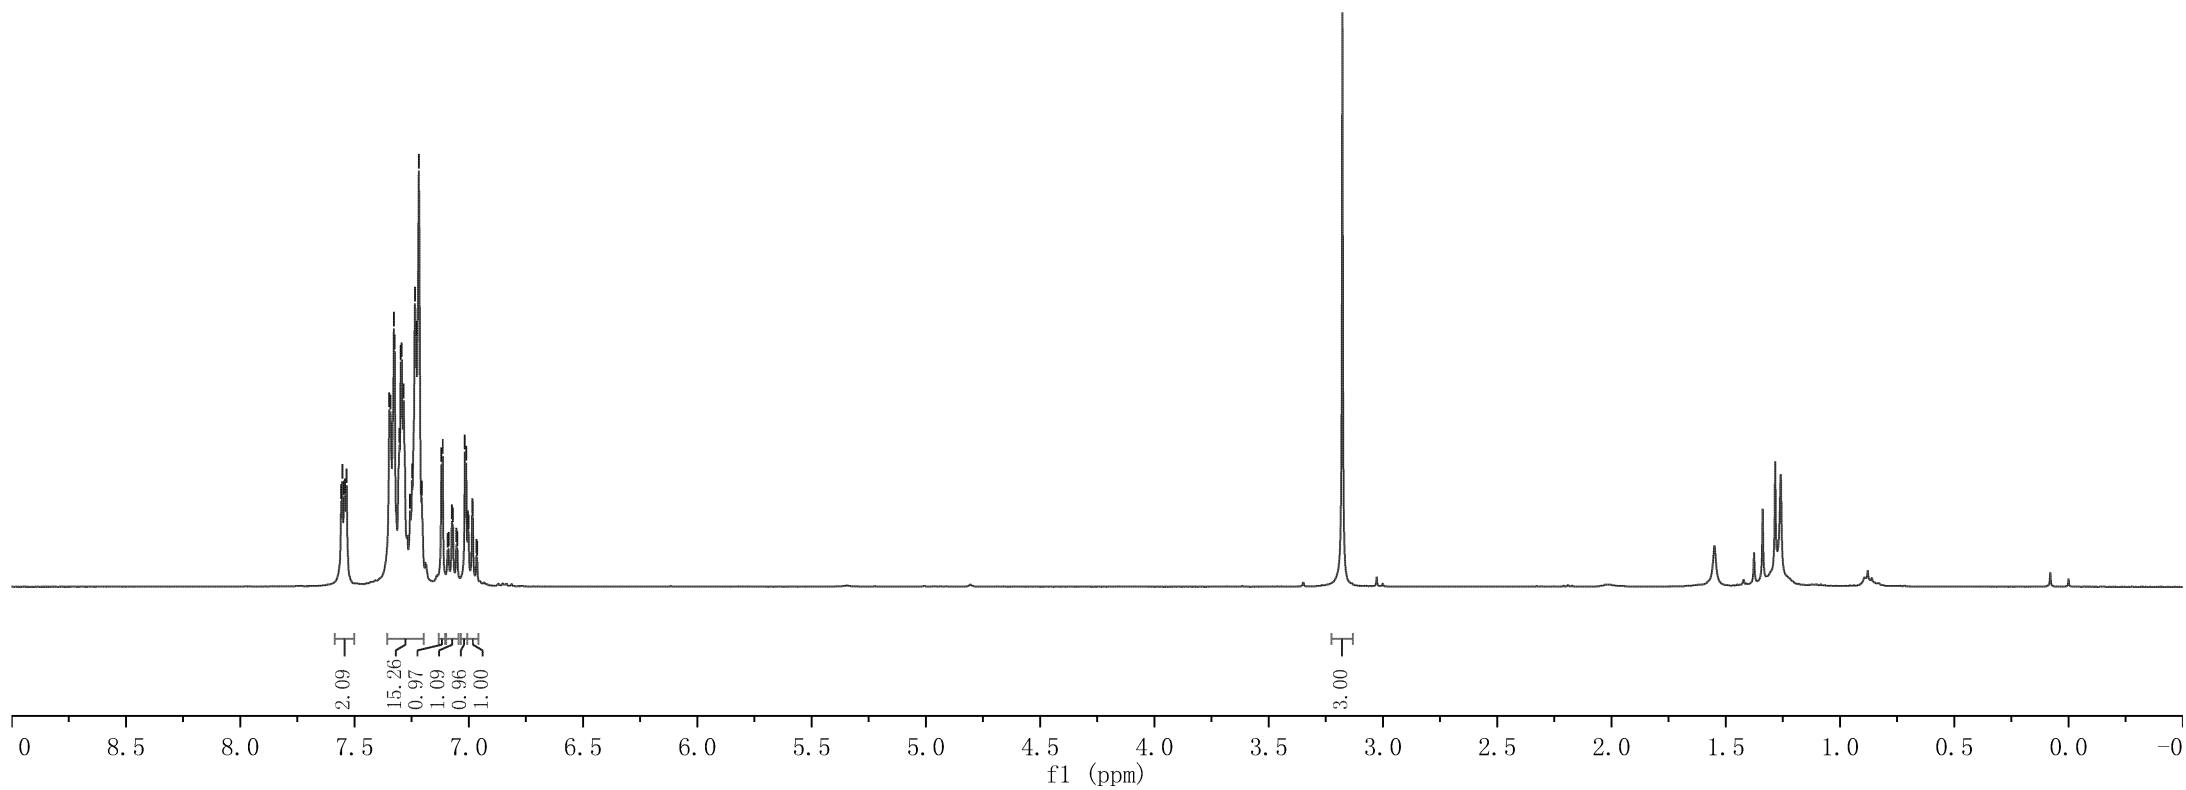

| Parameter                | Value               |
|--------------------------|---------------------|
| 1 Title                  | XHJ-2-124-2-C       |
| 2 Origin                 | Bruker BioSpin GmbH |
| 3 Solvent                | CDC13               |
| 4 Temperature            | 300.0               |
| 5 Number of Scans        | 33                  |
| 6 Acquisition Time       | 1.3631              |
| 7 Acquisition Date       | 2022-06-22T15:45:45 |
| 8 Spectrometer Frequency | 100.61              |
| 9 Spectral Width         | 24038.5             |

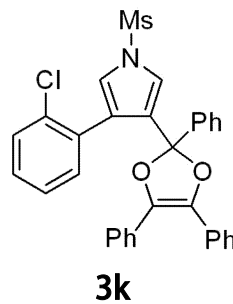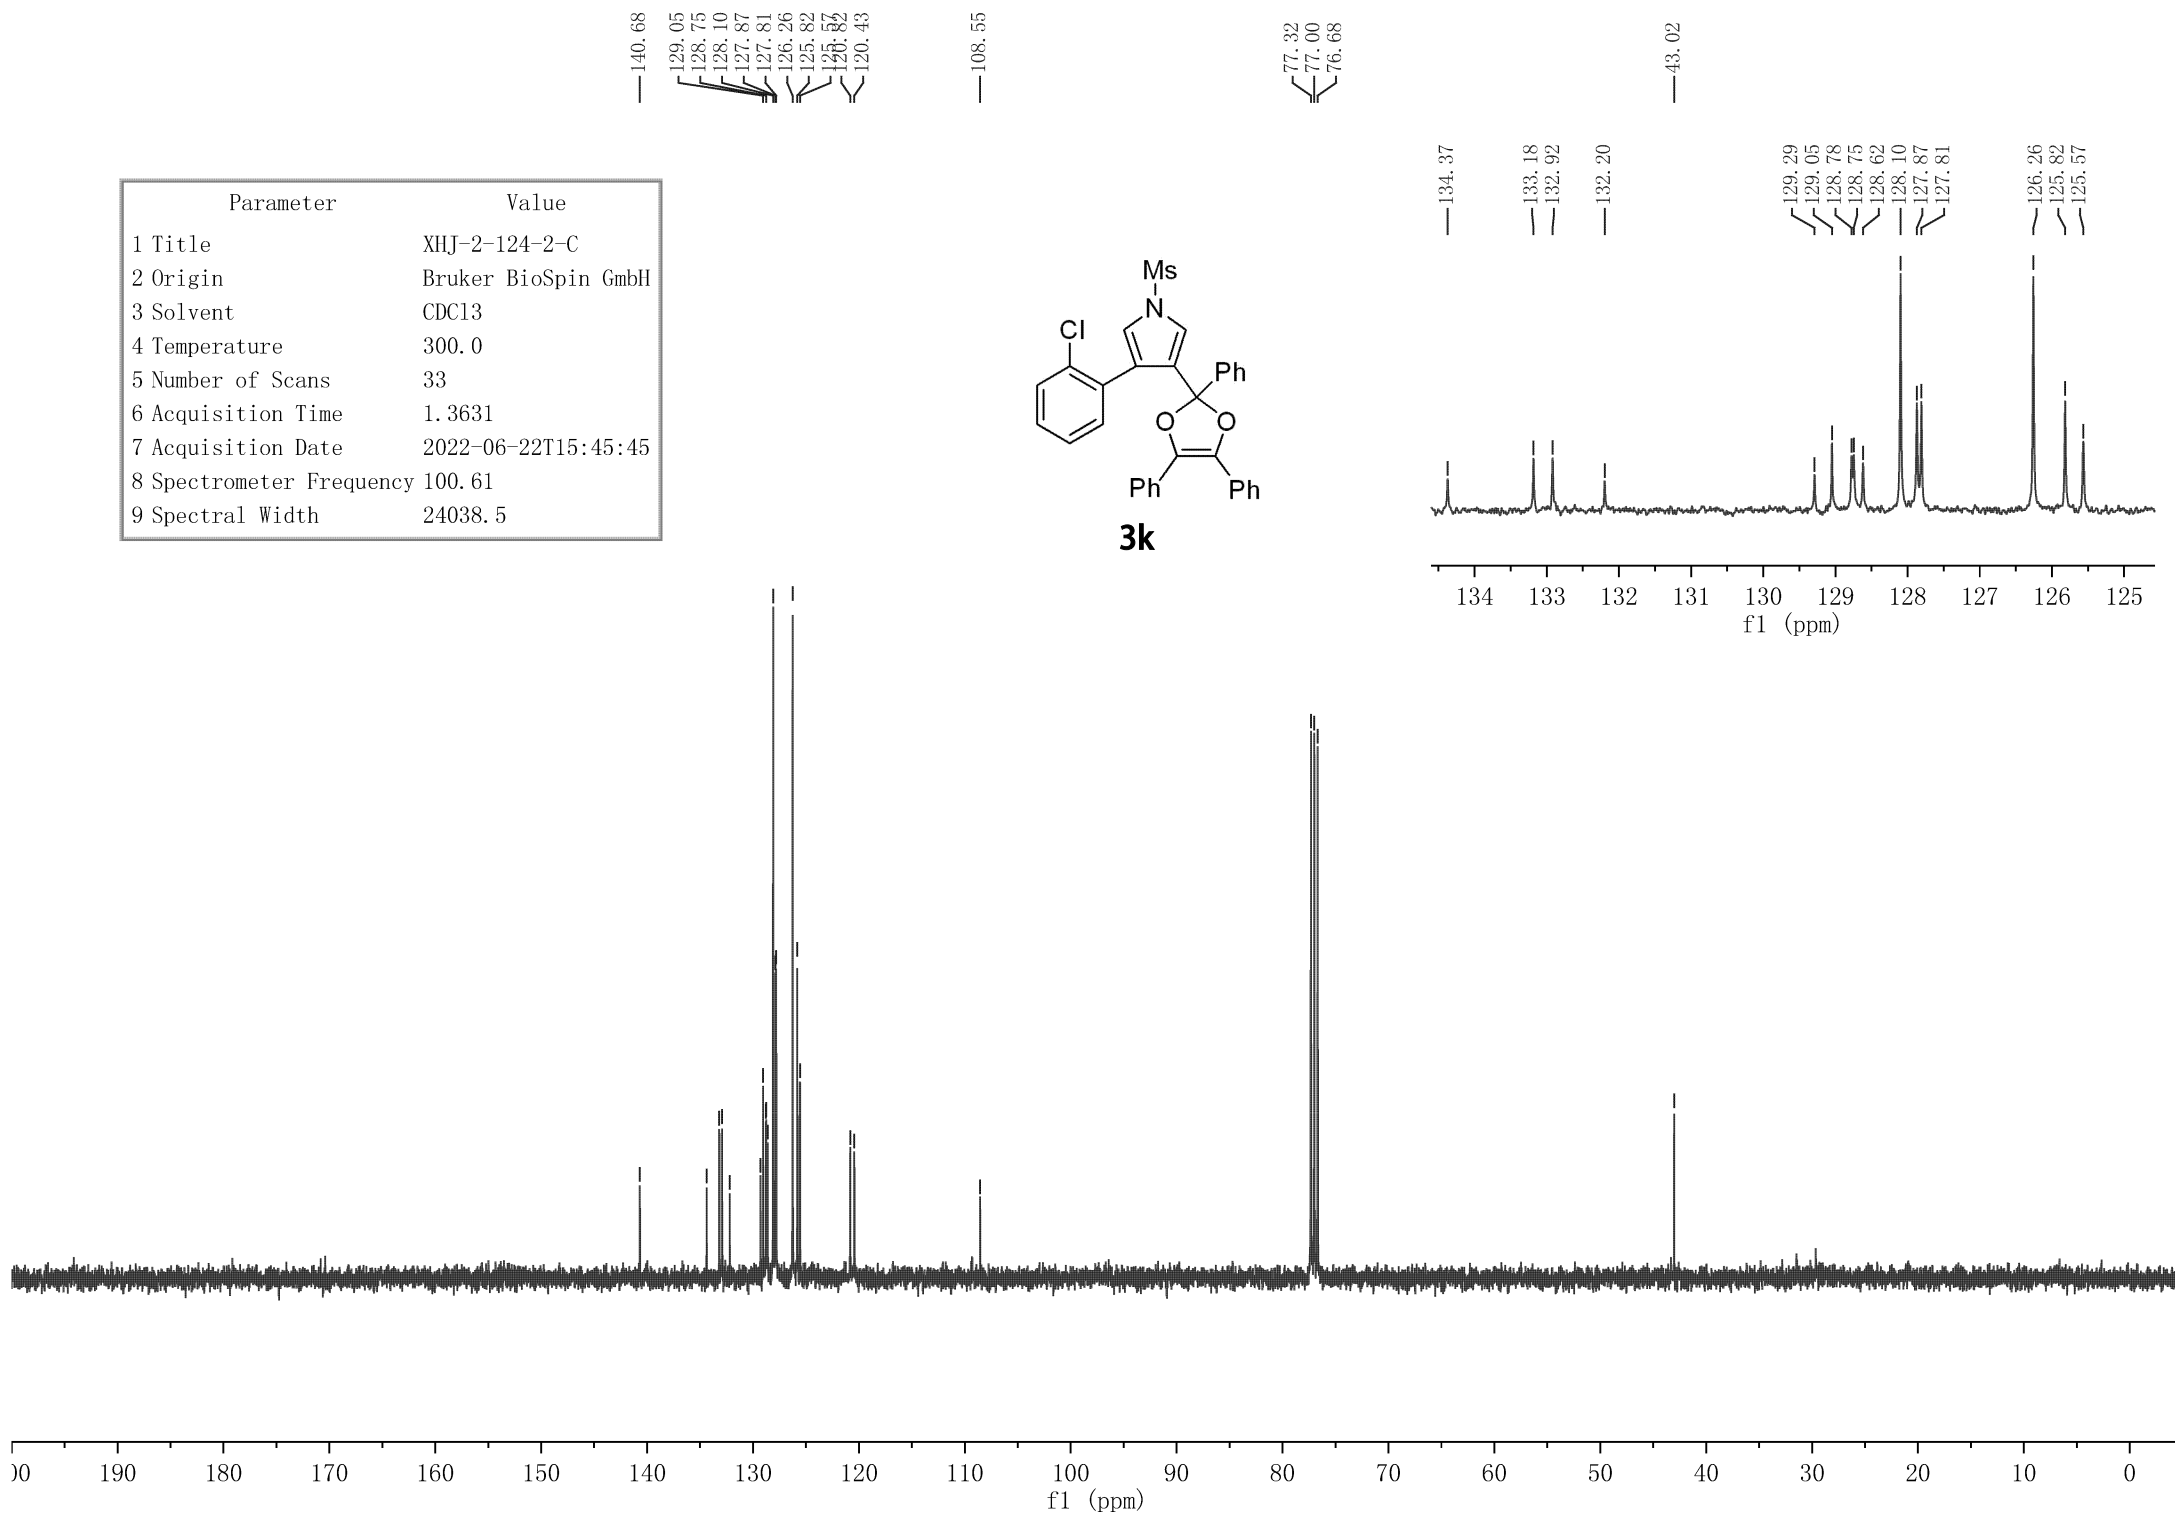

7.729  
7.722  
7.718  
7.709  
7.705  
7.573  
7.569  
7.552  
7.403  
7.398  
7.390  
7.386  
7.327  
7.322  
7.305  
7.286  
7.281  
7.277  
7.260  
7.244  
6.885  
6.746  
6.742

| Parameter                | Value               |
|--------------------------|---------------------|
| 1 Title                  | XHJ-1-171-2-H       |
| 2 Origin                 |                     |
| 3 Solvent                | CDCl3               |
| 4 Temperature            | 297.8               |
| 5 Number of Scans        | 16                  |
| 6 Acquisition Time       | 4.0002              |
| 7 Acquisition Date       | 2022-02-17T13:56:39 |
| 8 Spectrometer Frequency | 399.93              |
| 9 Spectral Width         | 8012.0              |

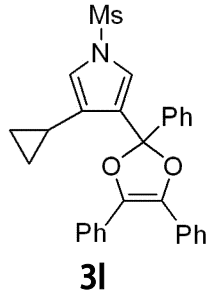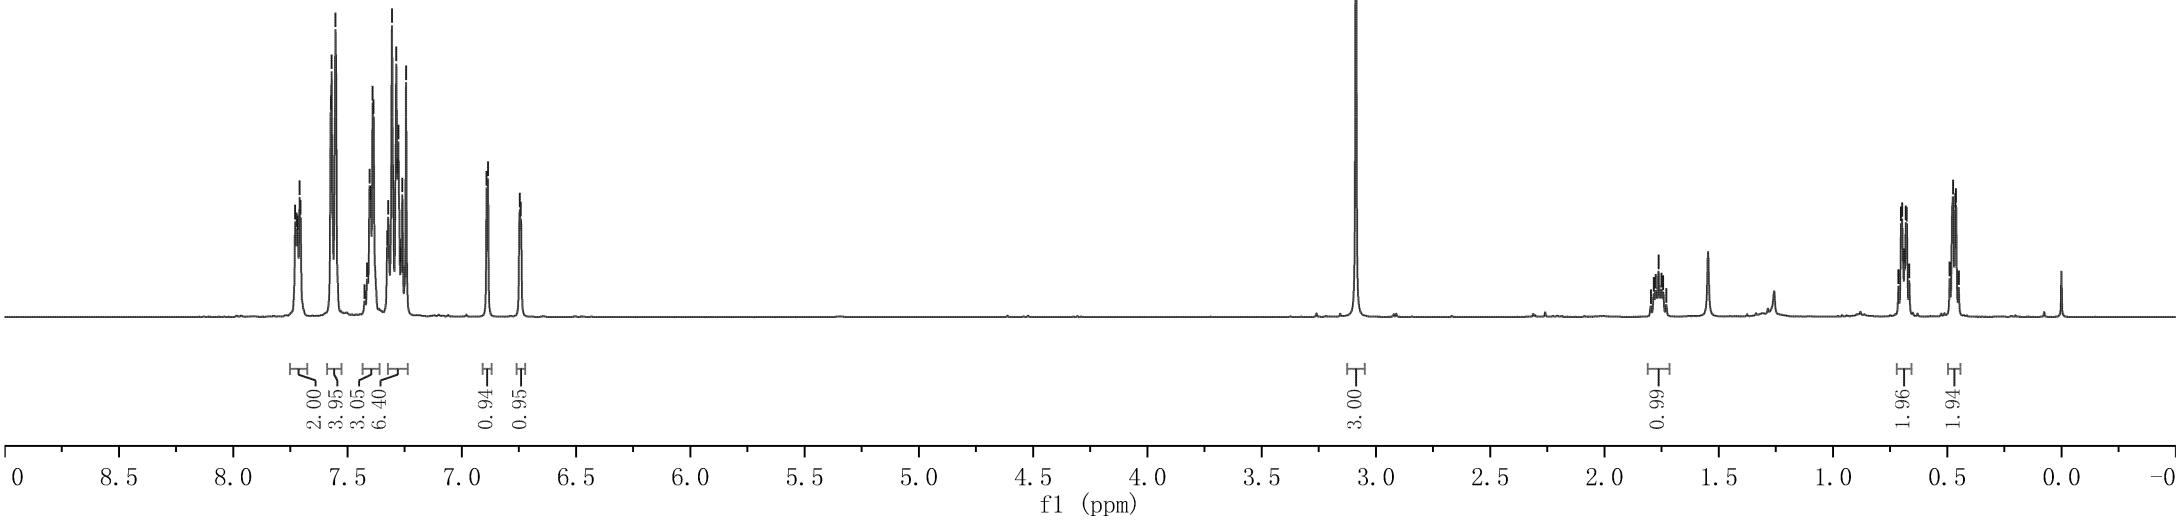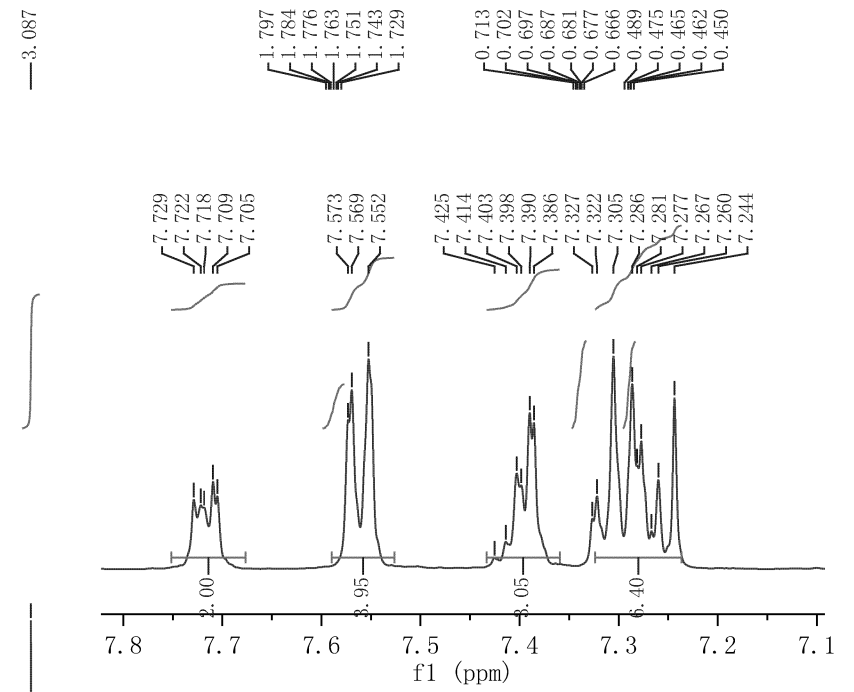

| Parameter                | Value               |
|--------------------------|---------------------|
| 1 Title                  | XHJ-1-171-2-C       |
| 2 Origin                 |                     |
| 3 Solvent                | CDC13               |
| 4 Temperature            | 297.8               |
| 5 Number of Scans        | 1000                |
| 6 Acquisition Time       | 1.0000              |
| 7 Acquisition Date       | 2022-02-17T14:32:20 |
| 8 Spectrometer Frequency | 100.56              |
| 9 Spectral Width         | 26041.0             |

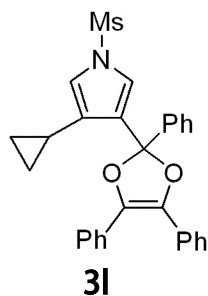

140.72  
 133.62  
 129.28  
 128.94  
 128.34  
 128.06  
 128.01  
 126.33  
 126.75  
 117.12  
 109.18

77.32  
 77.00  
 76.68

42.78

7.29  
 6.73

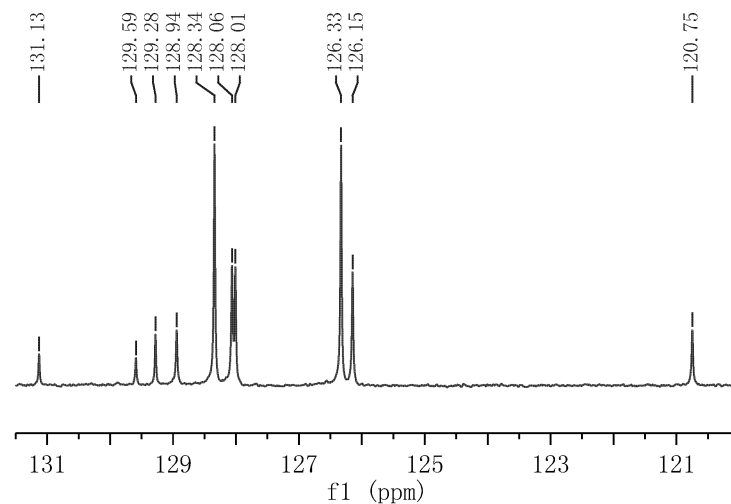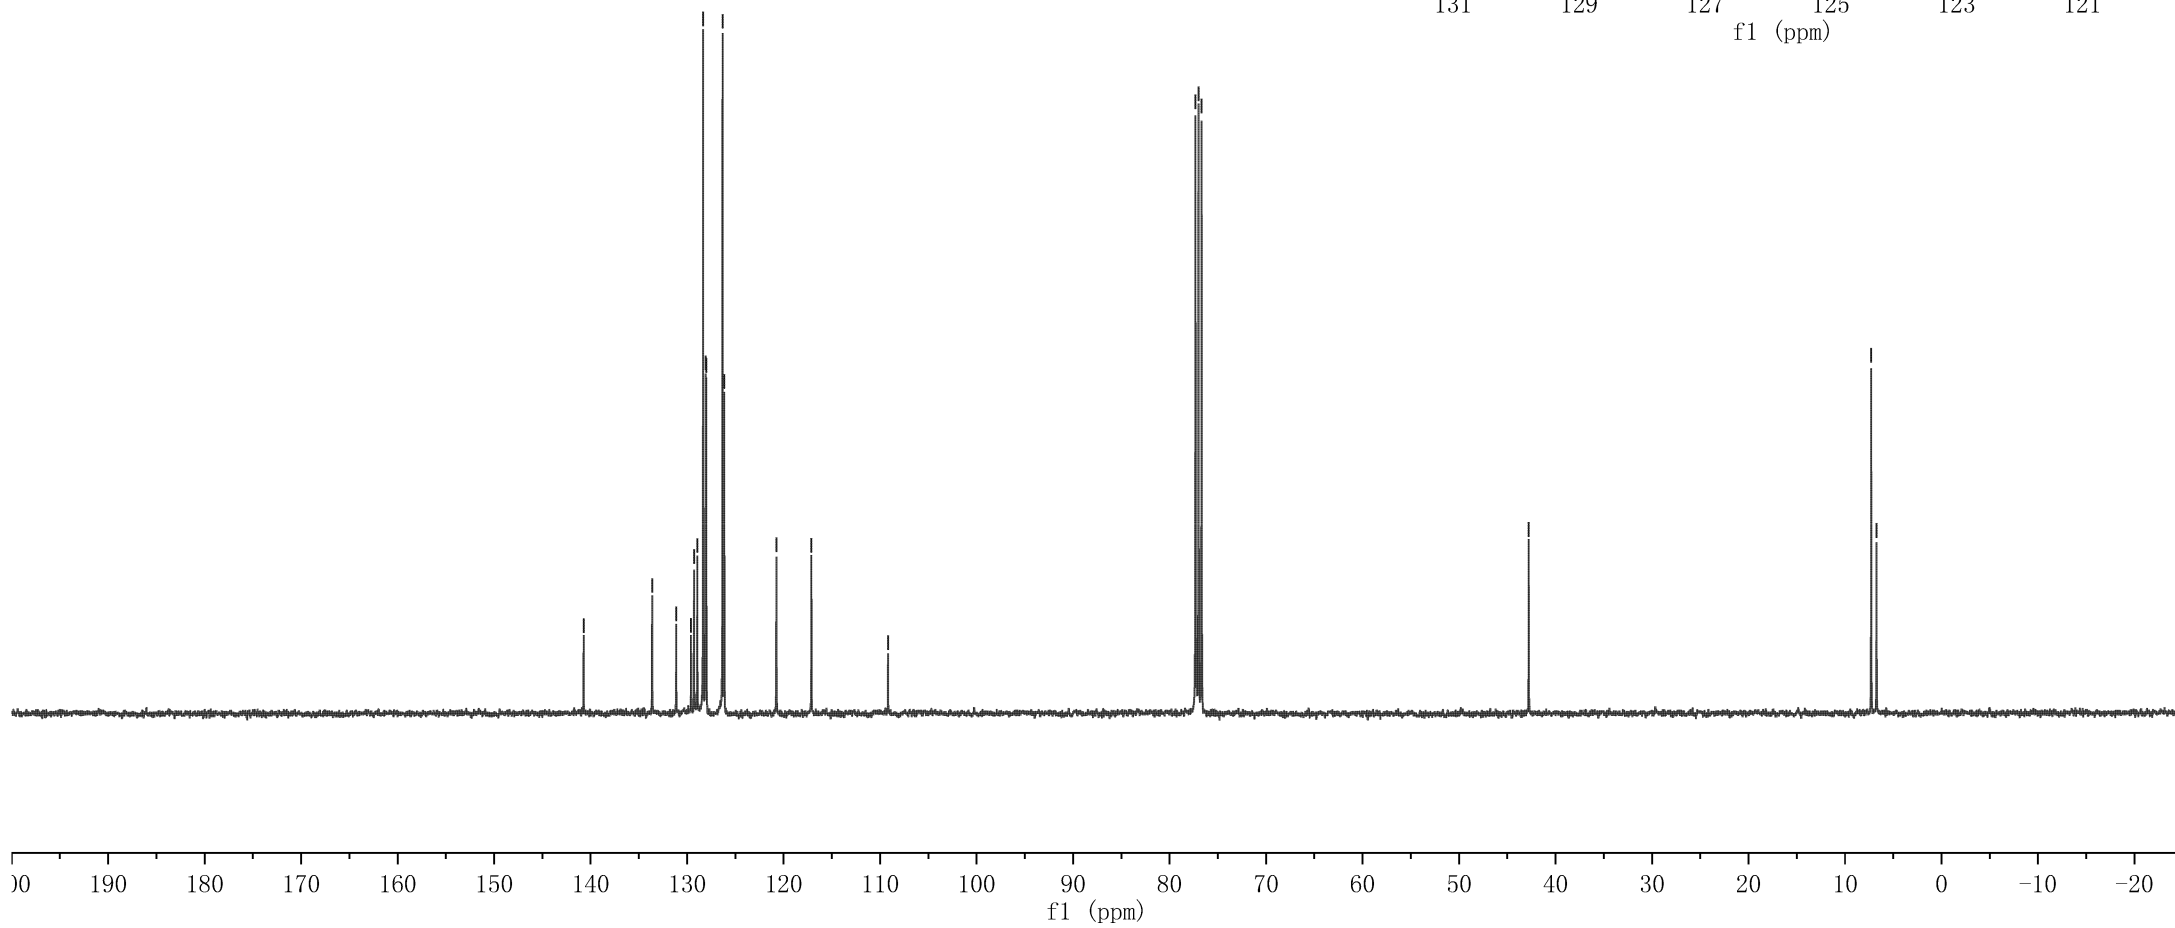

7.439  
7.426  
7.418  
7.404  
7.306  
7.295  
7.287  
7.283  
7.235  
7.221  
7.217  
7.129  
7.123  
7.028  
7.009  
6.990  
6.953  
6.932  
6.915  
6.909  
6.876  
6.857

| Parameter                | Value               |
|--------------------------|---------------------|
| 1 Title                  | XHJ-2-31-H          |
| 2 Origin                 | Bruker BioSpin GmbH |
| 3 Solvent                | CDC13               |
| 4 Temperature            | 298.0               |
| 5 Number of Scans        | 13                  |
| 6 Acquisition Time       | 4.0894              |
| 7 Acquisition Date       | 2022-04-21T11:58:56 |
| 8 Spectrometer Frequency | 400.13              |
| 9 Spectral Width         | 8012.8              |

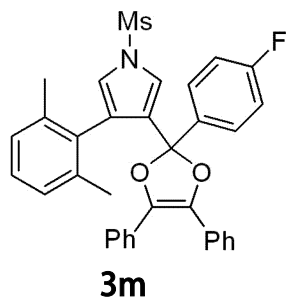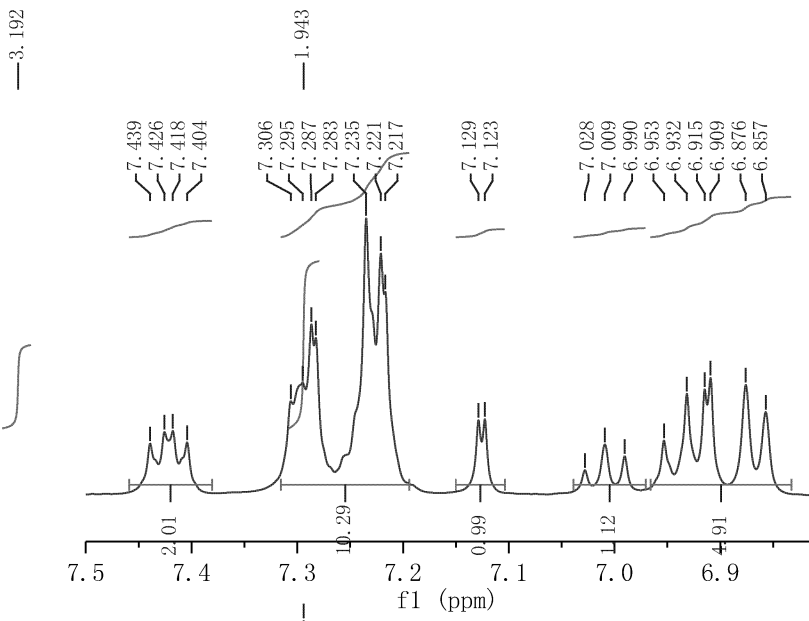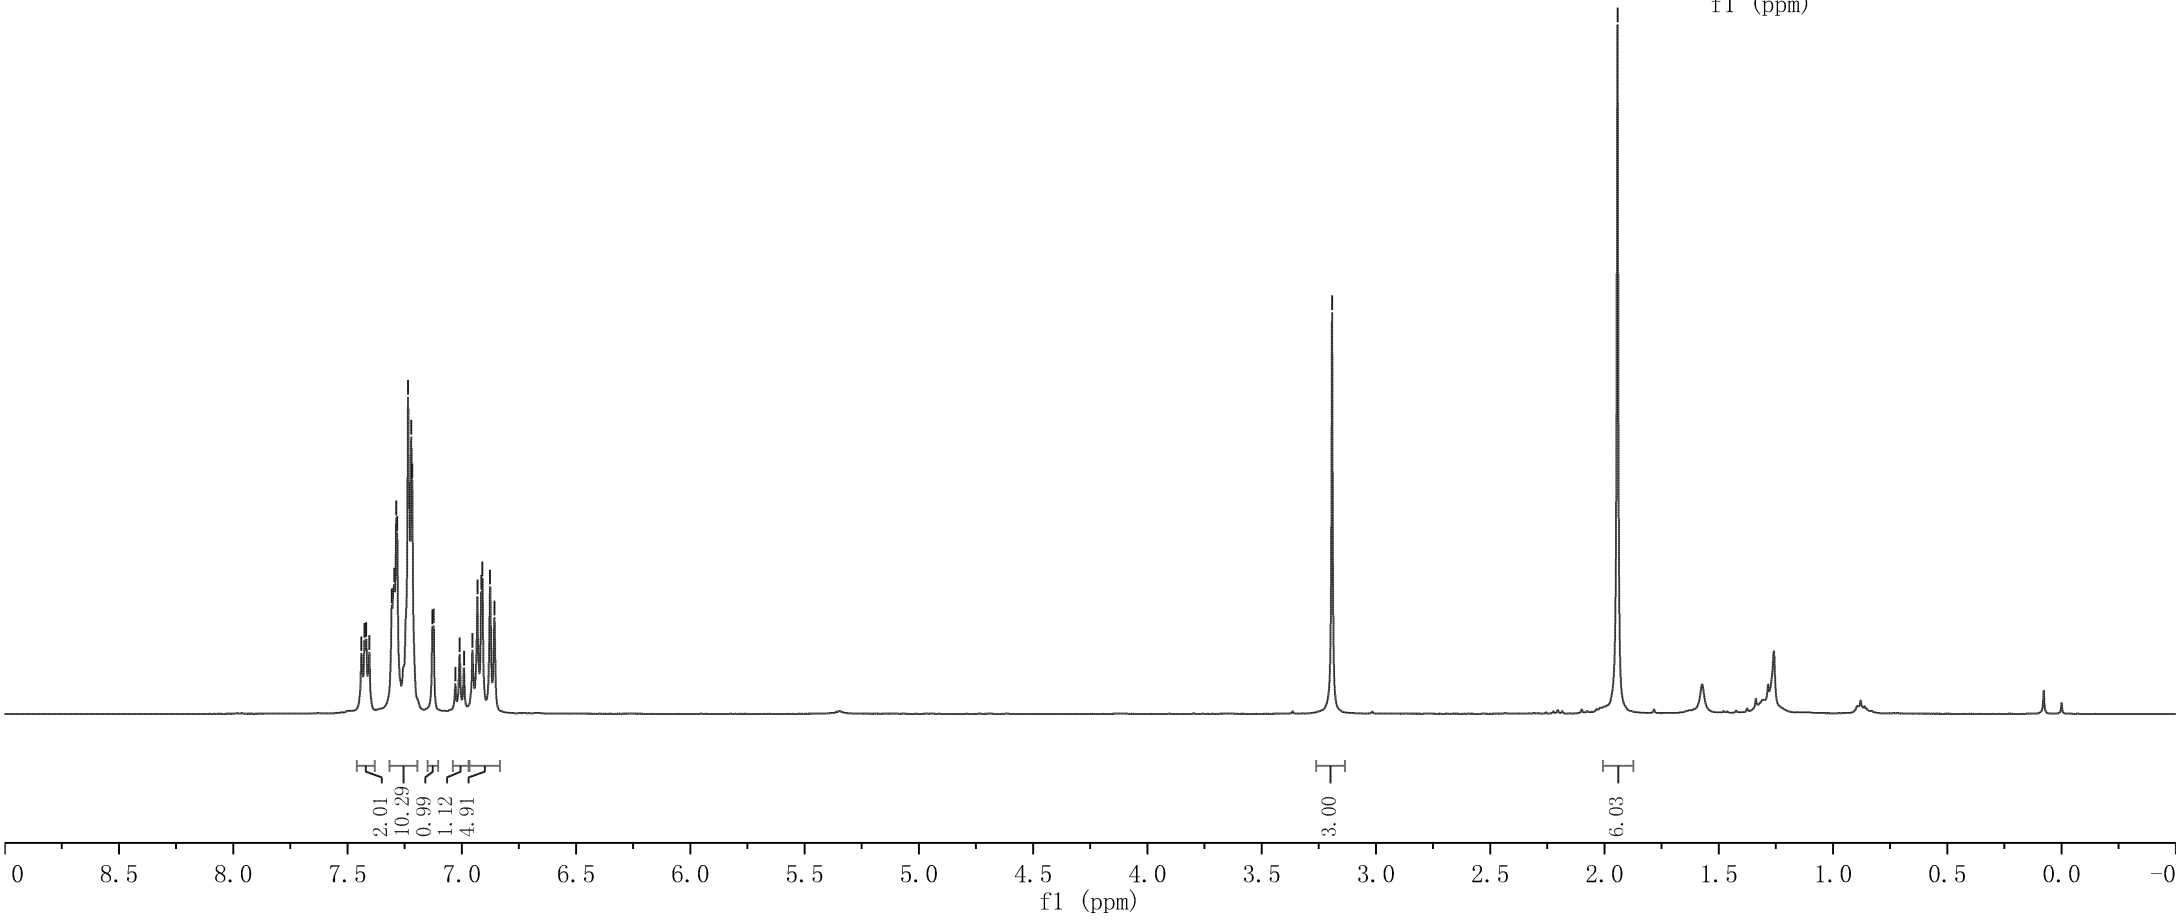

| Parameter                | Value               |
|--------------------------|---------------------|
| 1 Title                  | XHJ-2-31-C          |
| 2 Origin                 | Bruker BioSpin GmbH |
| 3 Solvent                | CDC13               |
| 4 Temperature            | 300.0               |
| 5 Number of Scans        | 160                 |
| 6 Acquisition Time       | 1.3631              |
| 7 Acquisition Date       | 2022-04-21T12:00:47 |
| 8 Spectrometer Frequency | 100.61              |
| 9 Spectral Width         | 24038.5             |

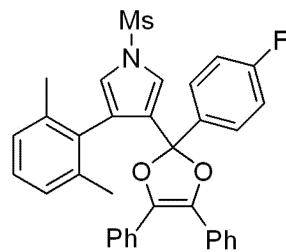

**3m**

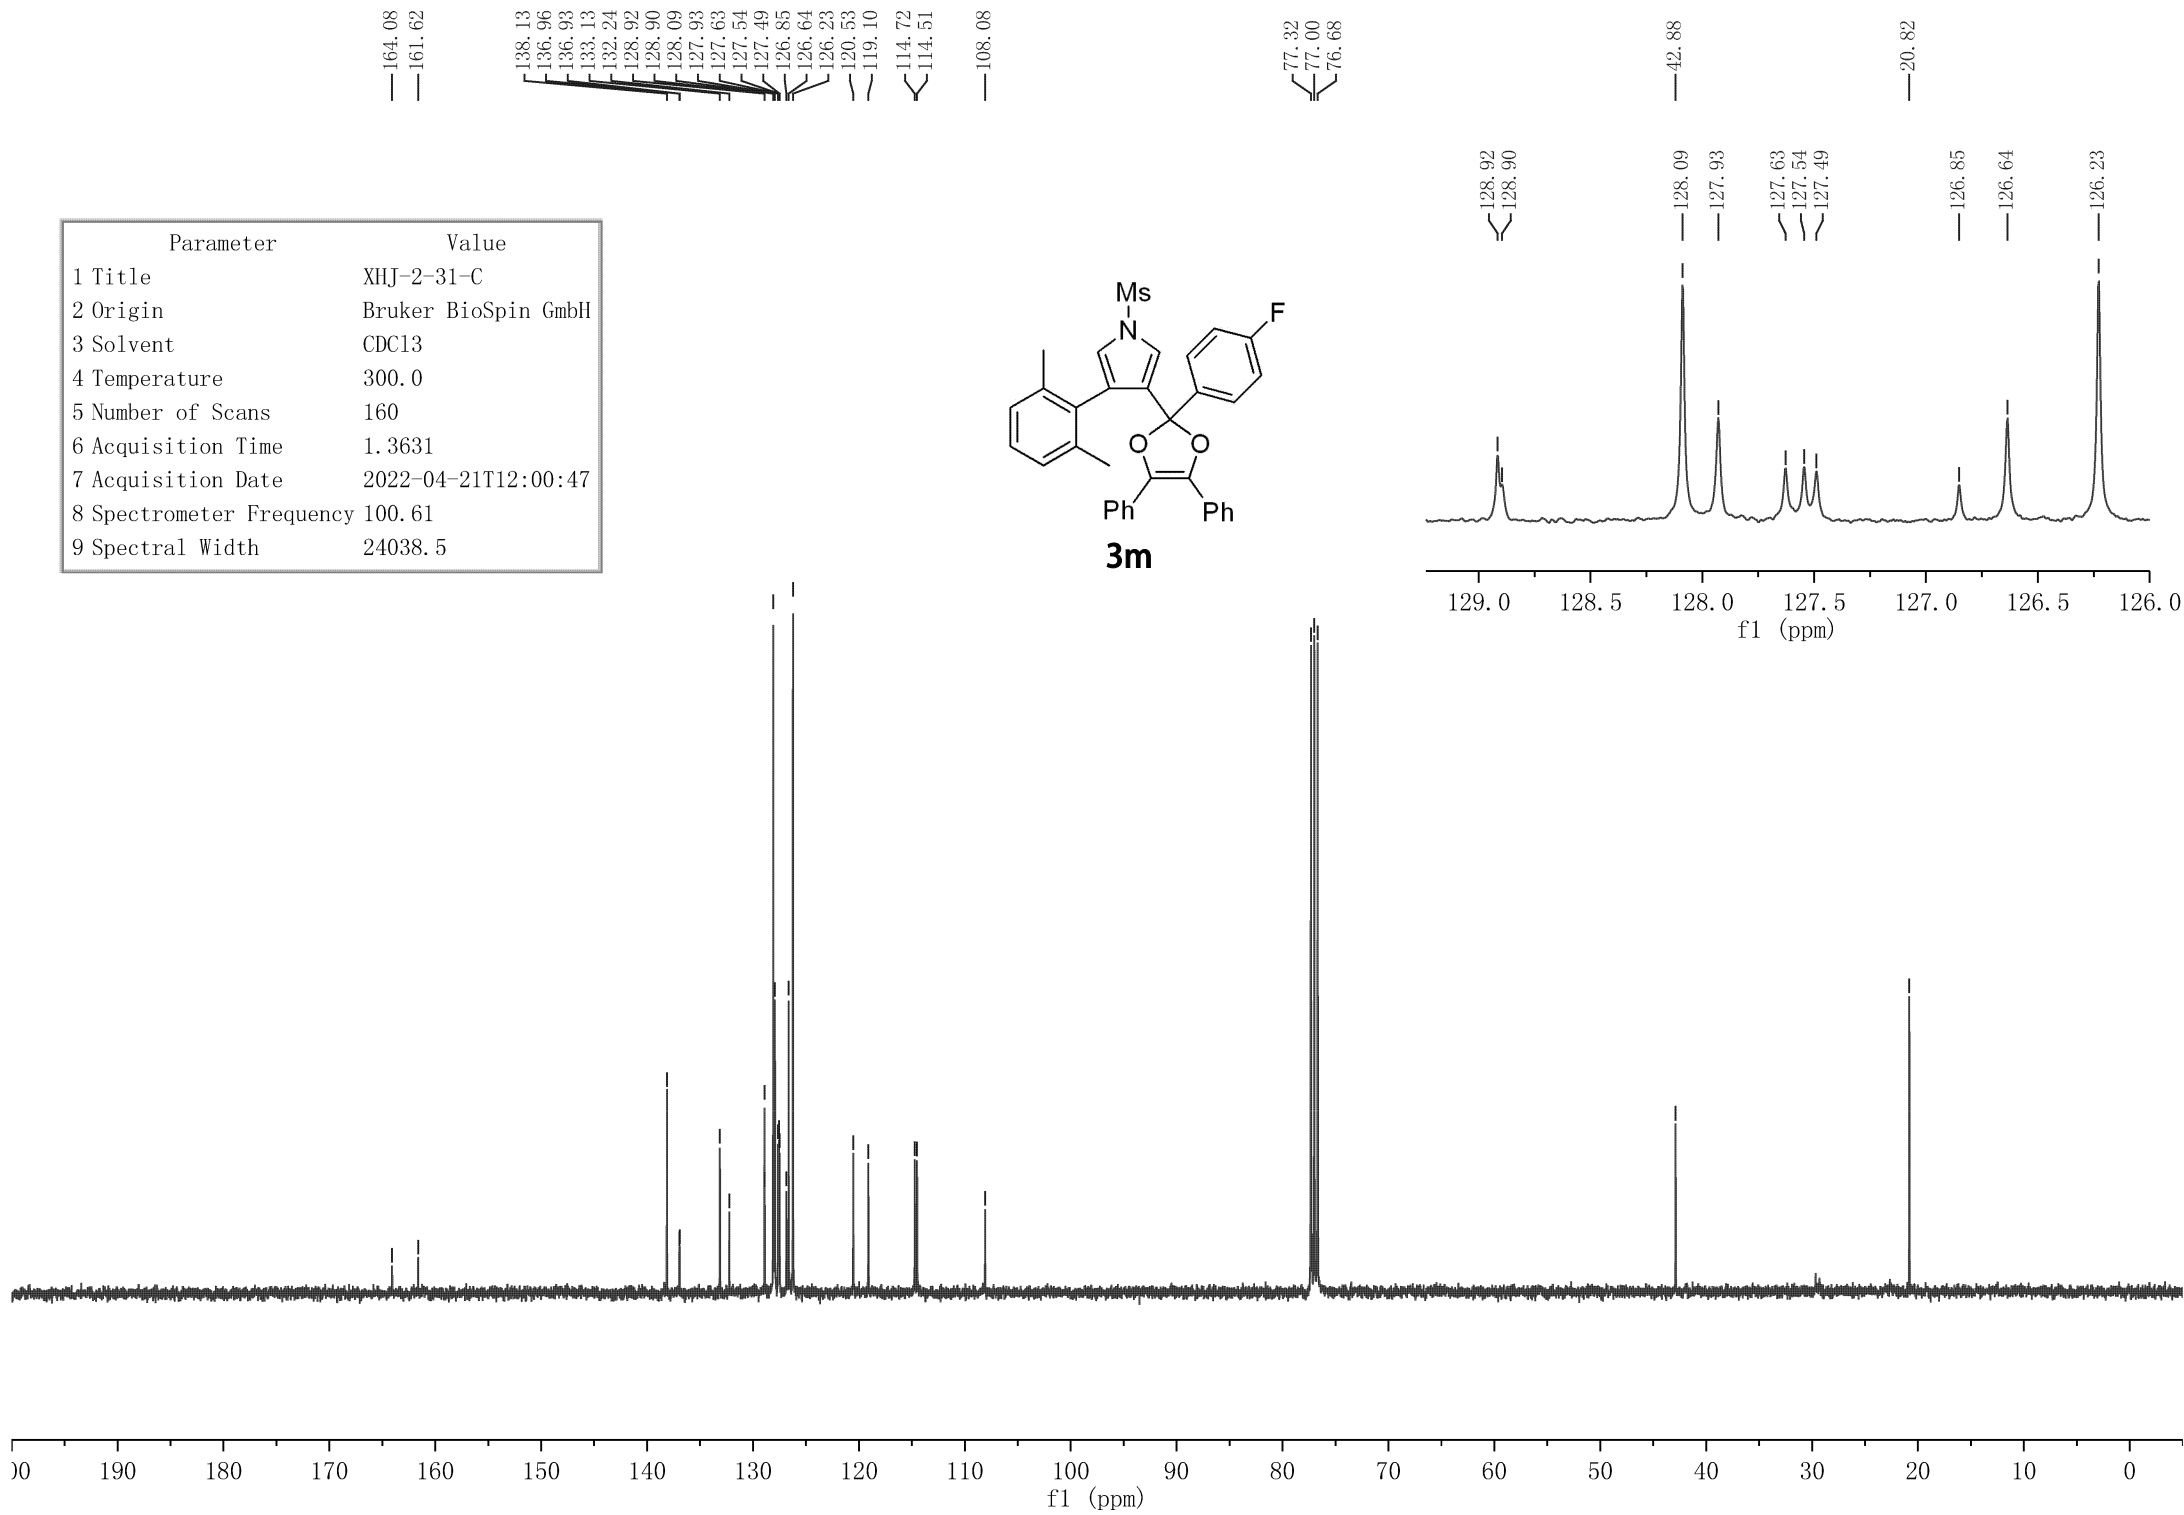



| Parameter                | Value               |
|--------------------------|---------------------|
| 1 Title                  | XHJ-2-31-F          |
| 2 Origin                 | Bruker BioSpin GmbH |
| 3 Solvent                | CDC13               |
| 4 Temperature            | 297.3               |
| 5 Number of Scans        | 16                  |
| 6 Acquisition Time       | 0.7340              |
| 7 Acquisition Date       | 2022-08-16T20:23:01 |
| 8 Spectrometer Frequency | 376.31              |
| 9 Spectral Width         | 89285.7             |

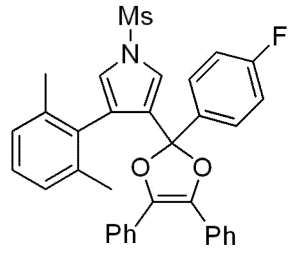

-113.41

3m

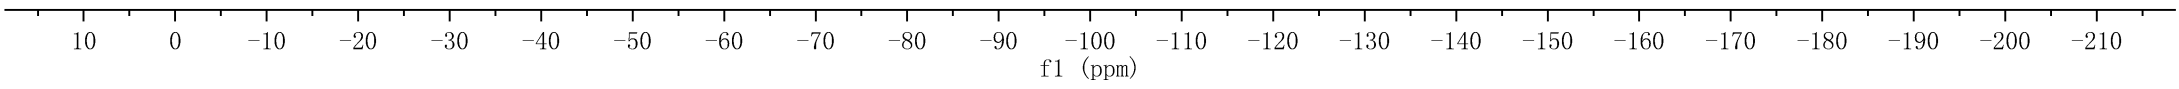

7.400  
7.379  
7.294  
7.284  
7.275  
7.270  
7.236  
7.221  
7.215  
7.117  
7.111  
7.031  
7.012  
6.993  
6.918  
6.912  
6.878  
6.859

| Parameter                | Value               |
|--------------------------|---------------------|
| 1 Title                  | XIJ-2-33-II-2       |
| 2 Origin                 | Bruker BioSpin GmbH |
| 3 Solvent                | CDC13               |
| 4 Temperature            | 298.0               |
| 5 Number of Scans        | 8                   |
| 6 Acquisition Time       | 4.0894              |
| 7 Acquisition Date       | 2022-04-21T16:30:15 |
| 8 Spectrometer Frequency | 400.13              |
| 9 Spectral Width         | 8012.8              |

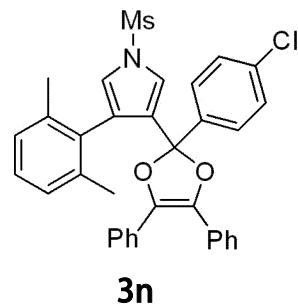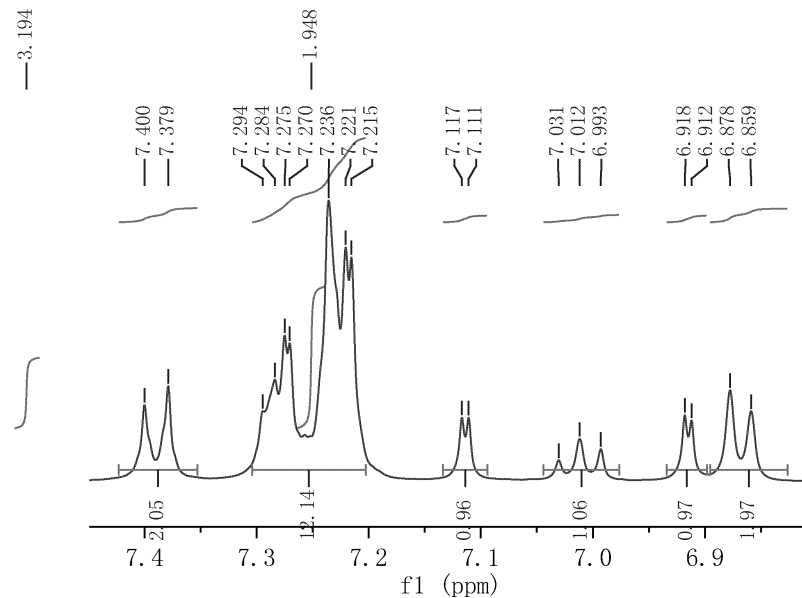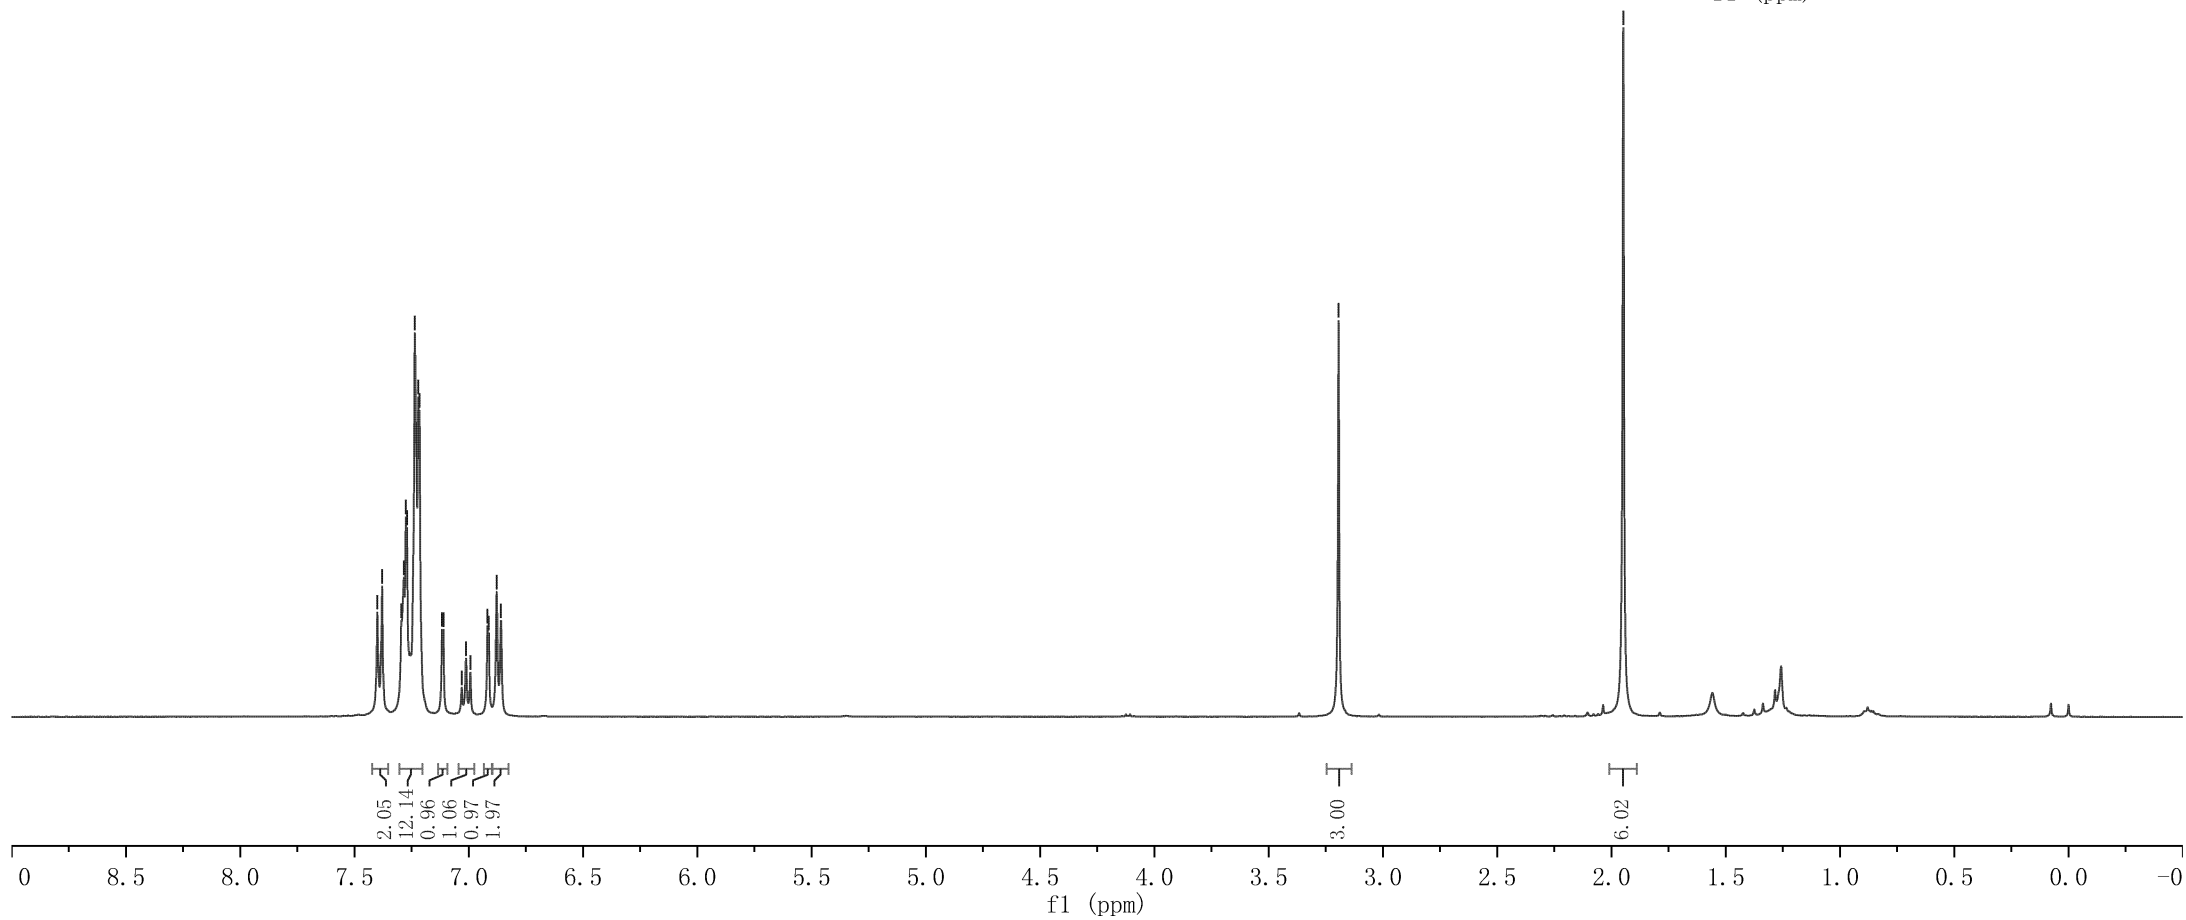

| Parameter                | Value               |
|--------------------------|---------------------|
| 1 Title                  | XHJ-2-33-C-2        |
| 2 Origin                 | Bruker BioSpin GmbH |
| 3 Solvent                | CDC13               |
| 4 Temperature            | 300.0               |
| 5 Number of Scans        | 76                  |
| 6 Acquisition Time       | 1.3631              |
| 7 Acquisition Date       | 2022-04-22T16:54:56 |
| 8 Spectrometer Frequency | 100.61              |
| 9 Spectral Width         | 24038.5             |

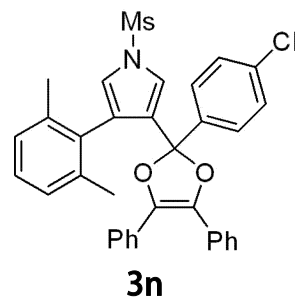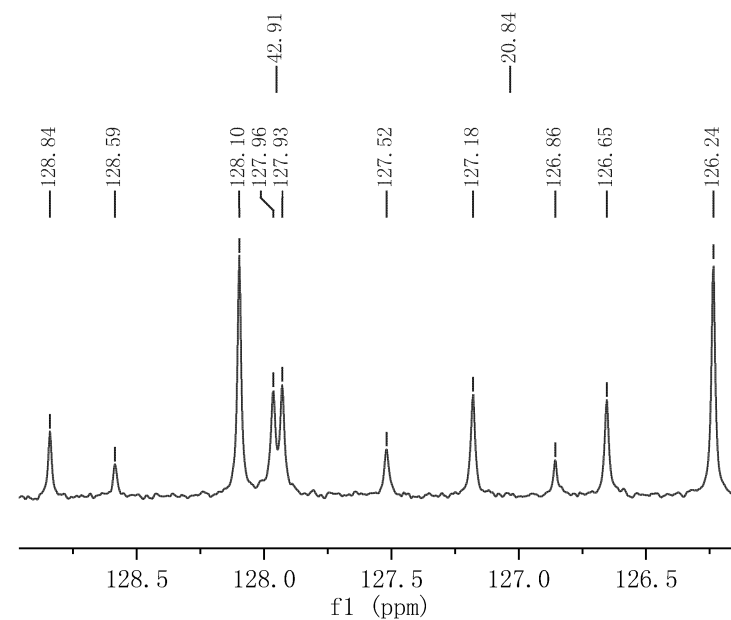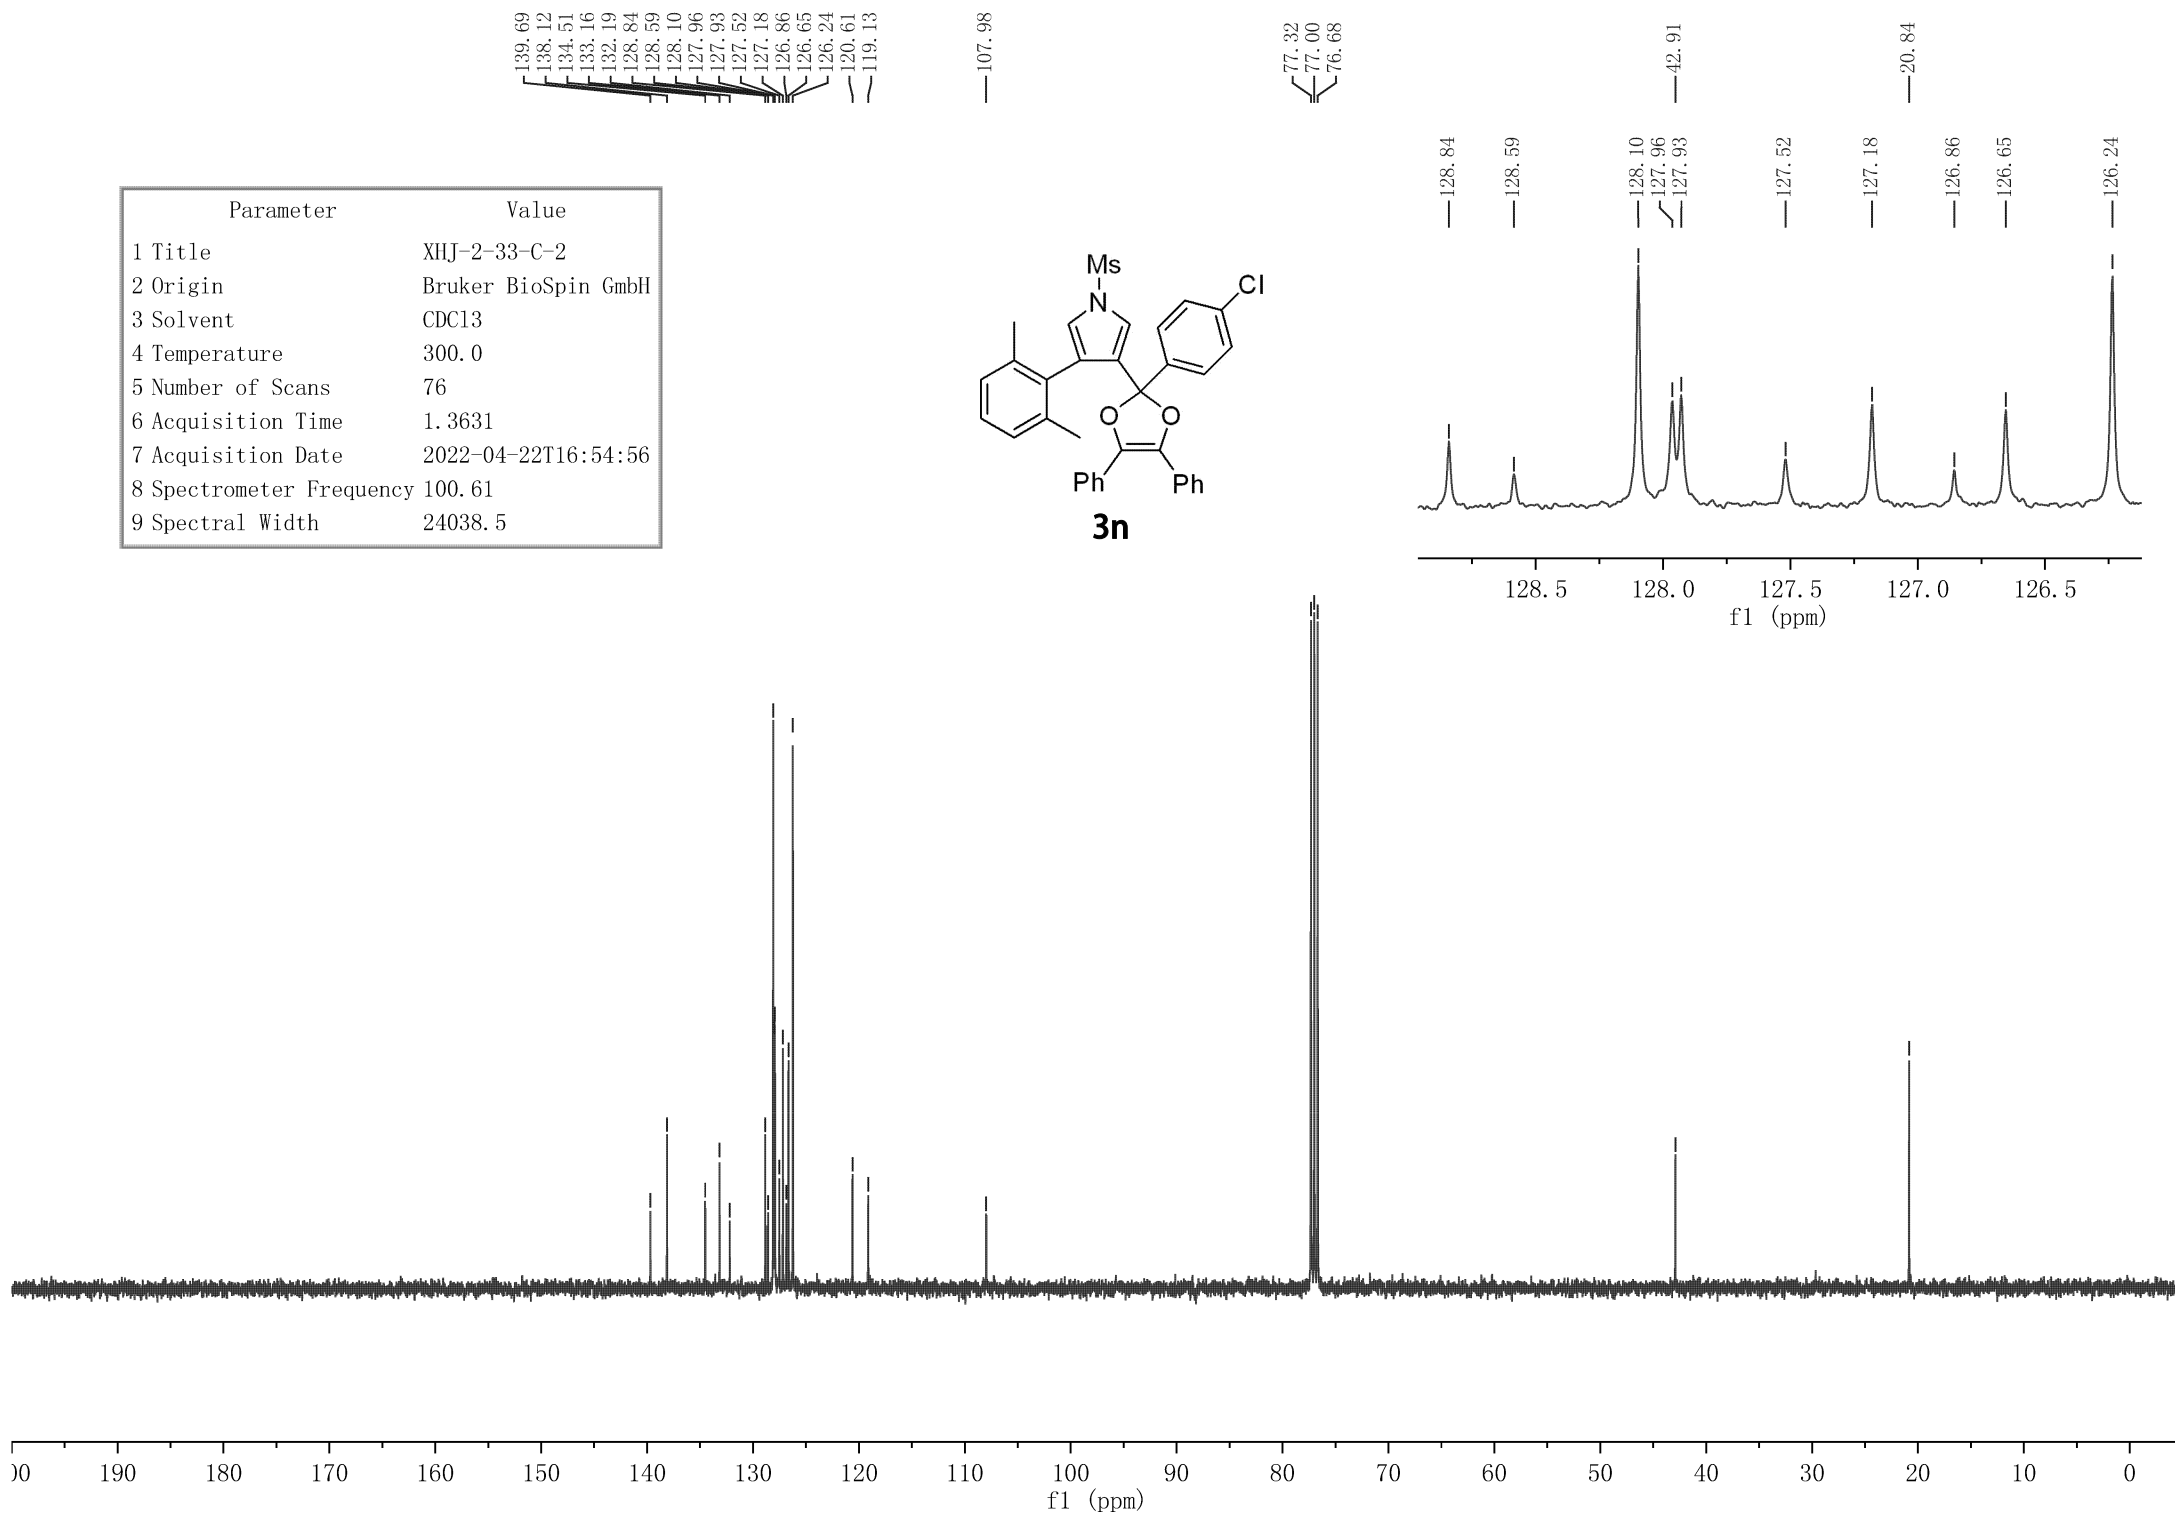

7.394  
7.373  
7.338  
7.316  
7.292  
7.281  
7.272  
7.267  
7.255  
7.235  
7.227  
7.219  
7.214  
7.116  
7.110  
7.030  
7.012  
6.993  
6.918  
6.911  
6.878  
6.859

| Parameter                | Value               |
|--------------------------|---------------------|
| 1 Title                  | XHJ-2-18-H          |
| 2 Origin                 | Bruker BioSpin GmbH |
| 3 Solvent                | CDC13               |
| 4 Temperature            | 298.0               |
| 5 Number of Scans        | 6                   |
| 6 Acquisition Time       | 4.0894              |
| 7 Acquisition Date       | 2022-04-14T16:58:12 |
| 8 Spectrometer Frequency | 400.13              |
| 9 Spectral Width         | 8012.8              |

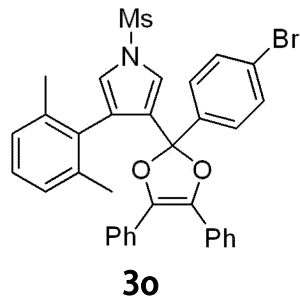

3.191

1.949

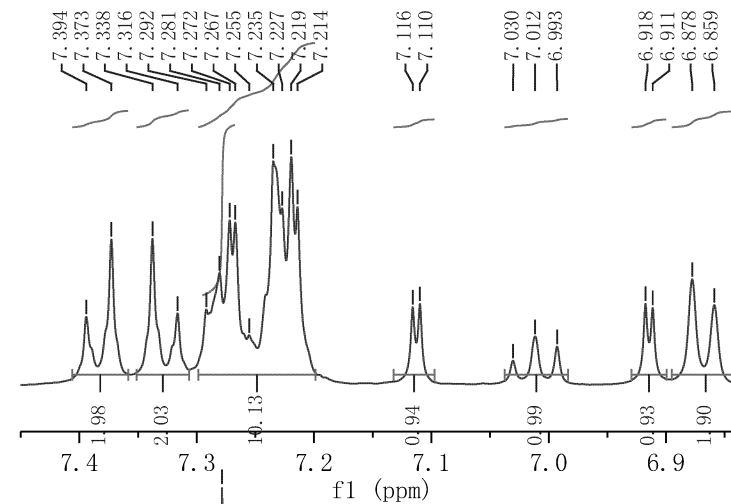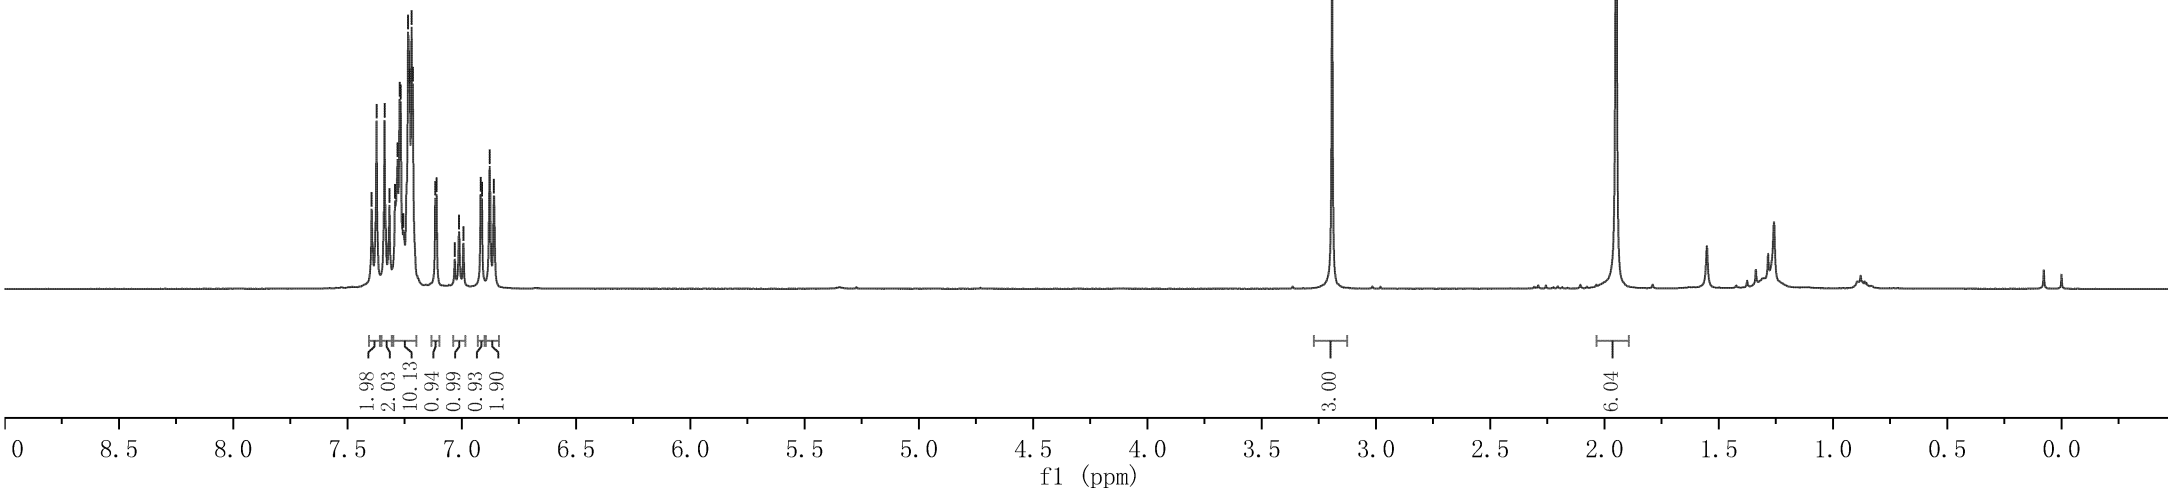

| Parameter                | Value               |
|--------------------------|---------------------|
| 1 Title                  | XHJ-2-18-C          |
| 2 Origin                 | Bruker BioSpin GmbH |
| 3 Solvent                | CDC13               |
| 4 Temperature            | 300.0               |
| 5 Number of Scans        | 94                  |
| 6 Acquisition Time       | 1.3631              |
| 7 Acquisition Date       | 2022-04-14T20:11:01 |
| 8 Spectrometer Frequency | 100.61              |
| 9 Spectral Width         | 24038.5             |

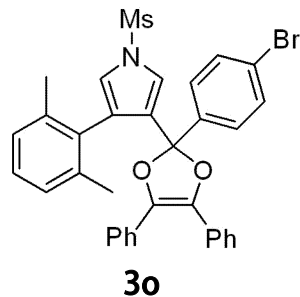

140.22  
138.12  
133.16  
130.88  
128.82  
128.09  
127.97  
127.52  
127.49  
126.84  
126.66  
126.23  
122.76  
120.61  
107.99

77.32  
77.00  
76.68

42.90

20.84

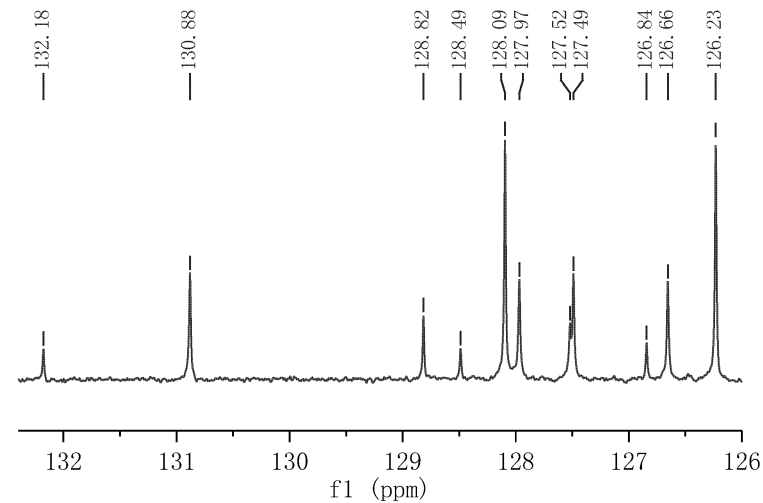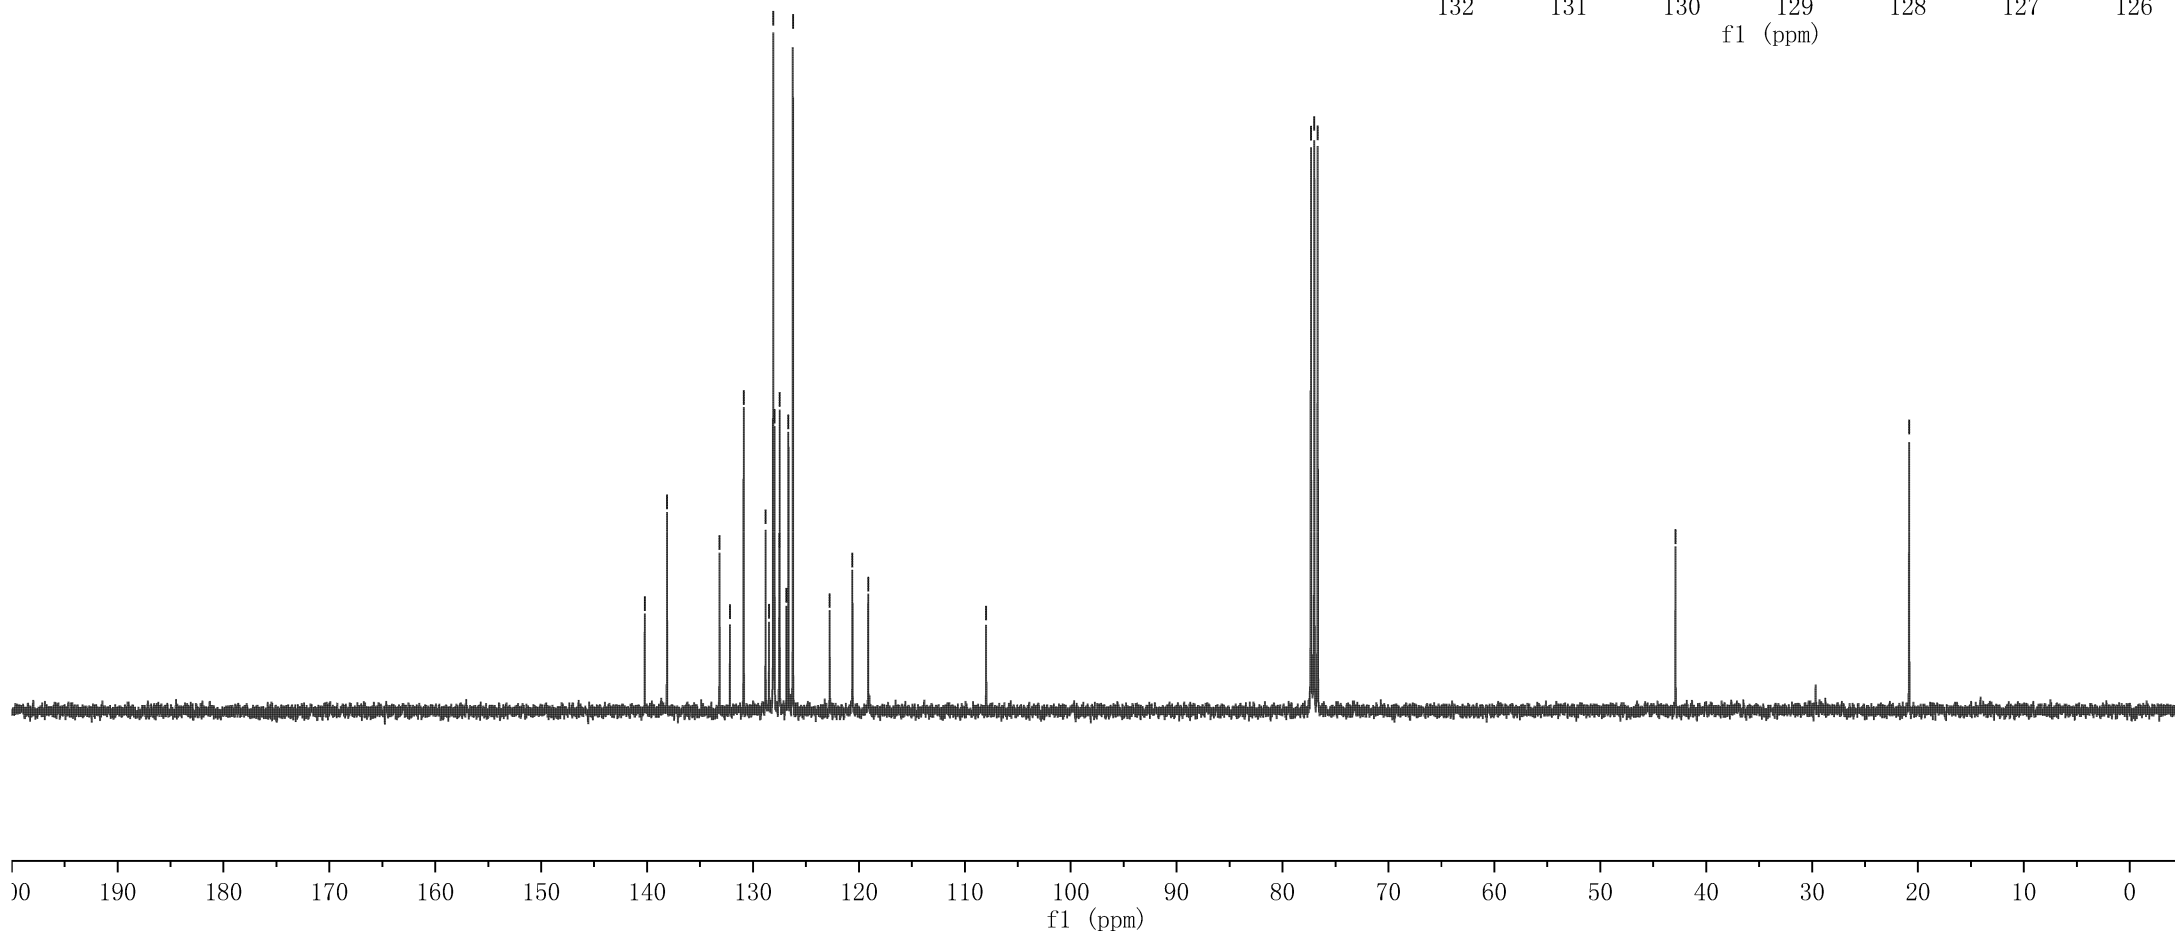

7.412  
7.395  
7.267  
7.255  
7.235  
7.231  
7.207  
7.194  
7.102  
7.084  
7.006  
6.985  
6.967  
6.907  
6.903  
6.860  
6.842

3.165  
2.340  
1.987

| Parameter                | Value               |
|--------------------------|---------------------|
| 1 Title                  | XHJ-2-20-II         |
| 2 Origin                 |                     |
| 3 Solvent                | CDCl3               |
| 4 Temperature            | 296.3               |
| 5 Number of Scans        | 16                  |
| 6 Acquisition Time       | 4.0002              |
| 7 Acquisition Date       | 2022-04-16T05:48:15 |
| 8 Spectrometer Frequency | 399.93              |
| 9 Spectral Width         | 8012.0              |

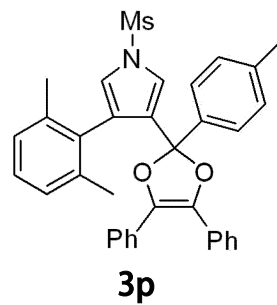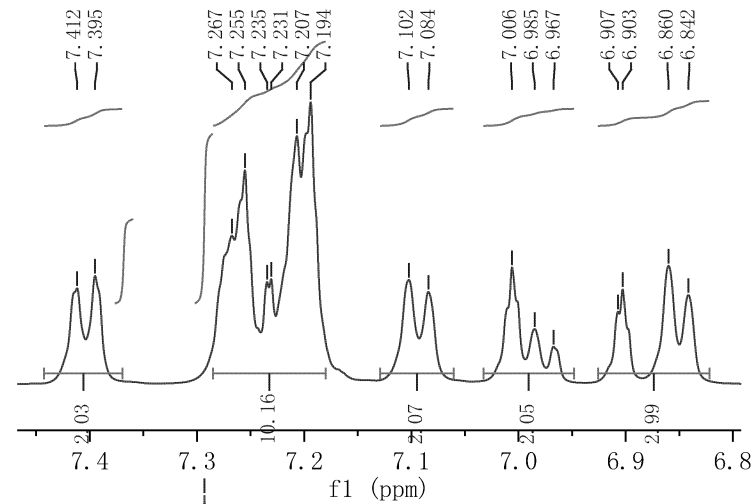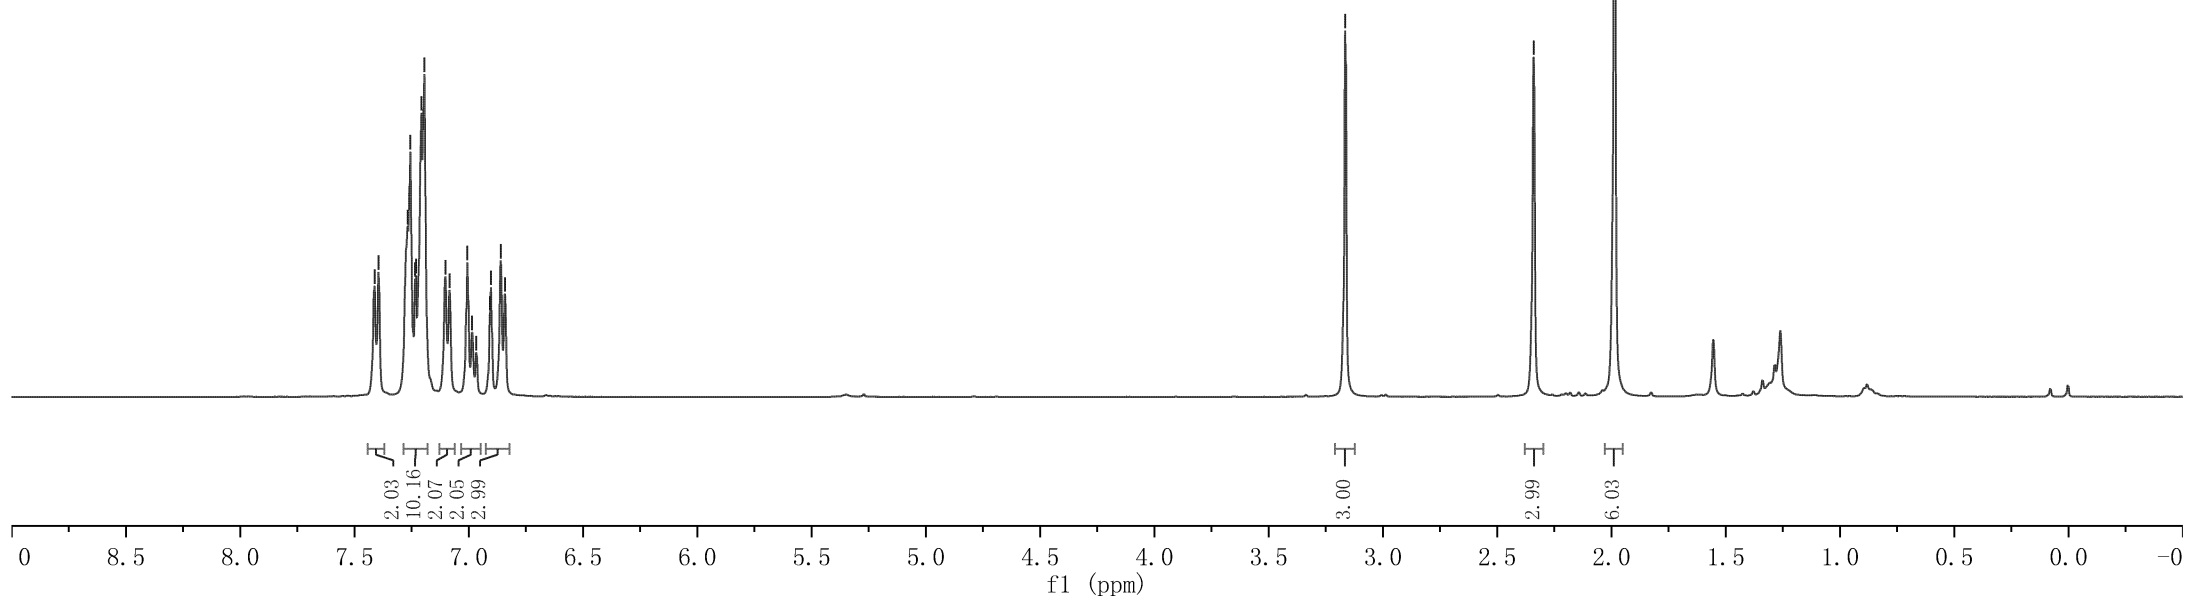

| Parameter                | Value               |
|--------------------------|---------------------|
| 1 Title                  | XHJ-2-20-C          |
| 2 Origin                 |                     |
| 3 Solvent                | CDC13               |
| 4 Temperature            | 296.8               |
| 5 Number of Scans        | 300                 |
| 6 Acquisition Time       | 1.0000              |
| 7 Acquisition Date       | 2022-04-16T06:00:38 |
| 8 Spectrometer Frequency | 100.56              |
| 9 Spectral Width         | 26041.0             |

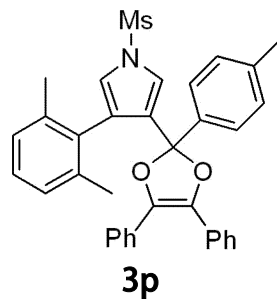

138.38  
138.16  
138.11

128.42  
127.94  
127.69  
126.58  
126.23  
121.62  
118.93

108.48

77.32  
77.00  
76.68

42.83

21.18  
20.90

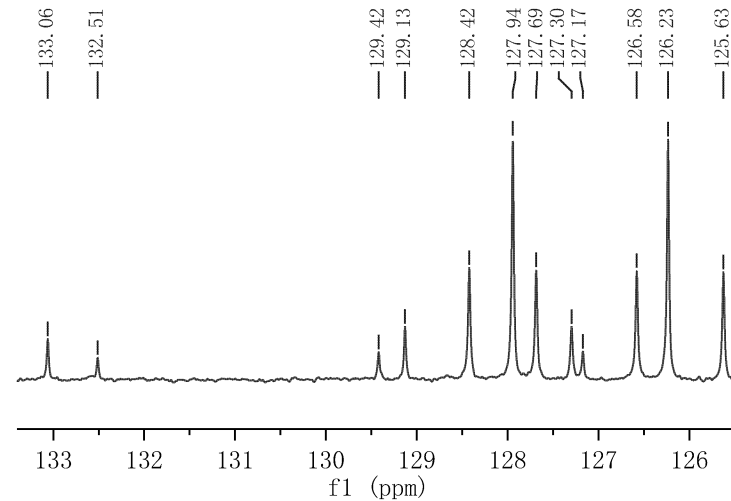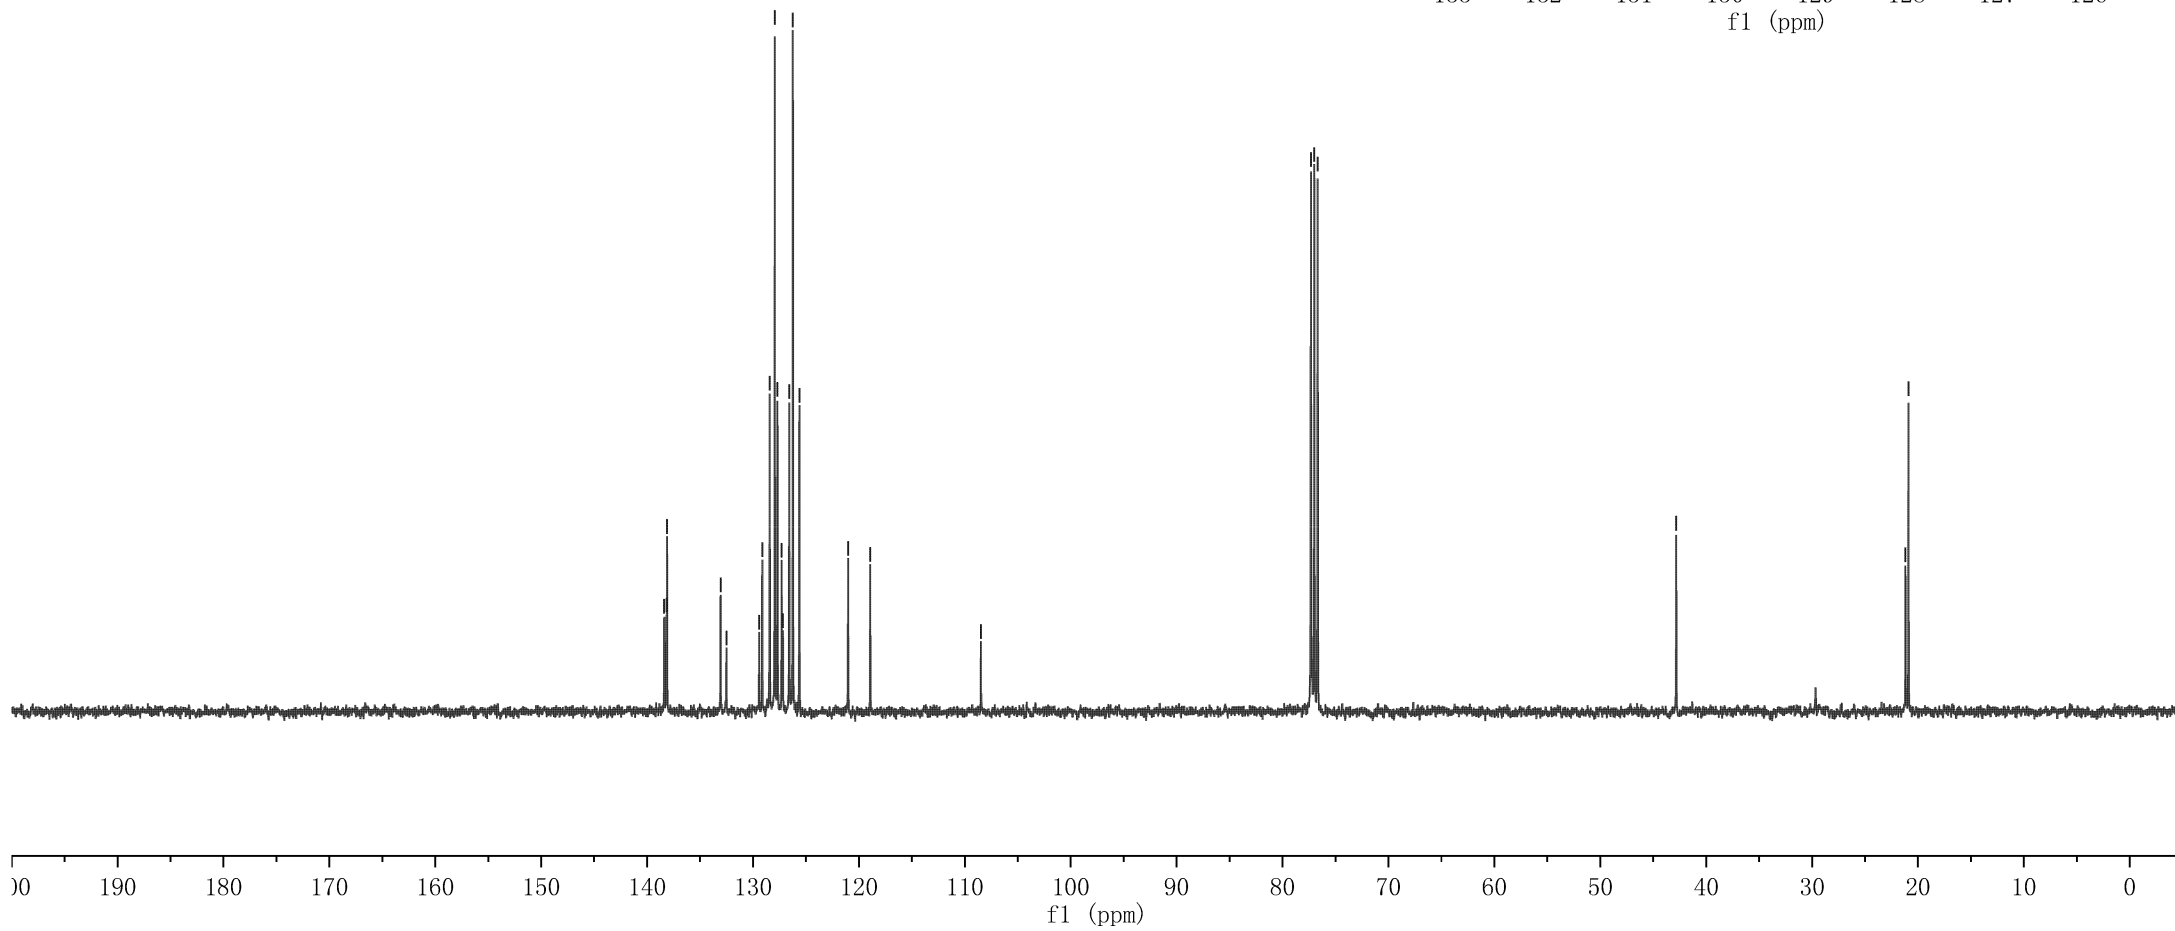





| Parameter                | Value               |
|--------------------------|---------------------|
| 1 Title                  | XHJ-2-34-C          |
| 2 Origin                 | Bruker BioSpin GmbH |
| 3 Solvent                | CDC13               |
| 4 Temperature            | 300.0               |
| 5 Number of Scans        | 102                 |
| 6 Acquisition Time       | 1.3631              |
| 7 Acquisition Date       | 2022-04-22T16:46:04 |
| 8 Spectrometer Frequency | 100.61              |
| 9 Spectral Width         | 24038.5             |

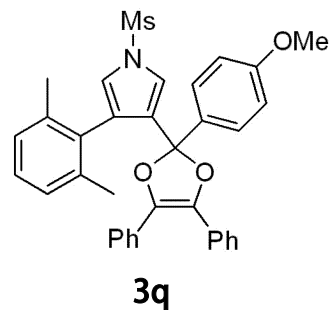

159.80  
 138.13  
 133.08  
 129.16  
 127.98  
 127.72  
 127.01  
 126.59  
 126.24  
 118.98  
 113.12  
 108.46

77.32  
 77.00  
 76.68

55.26

42.84

20.88

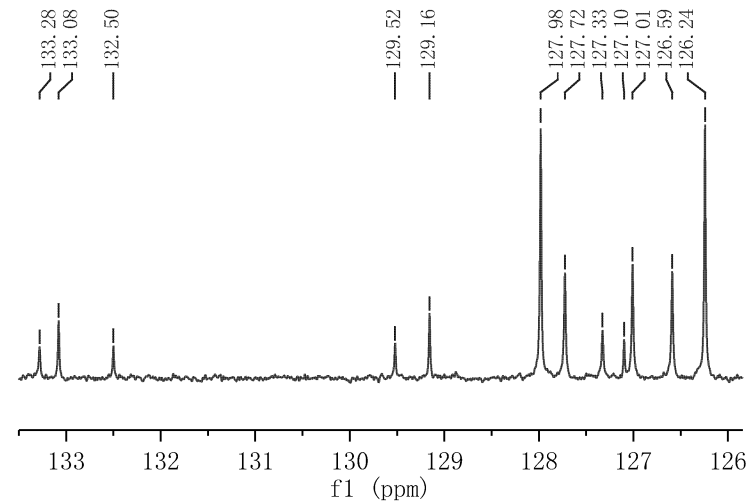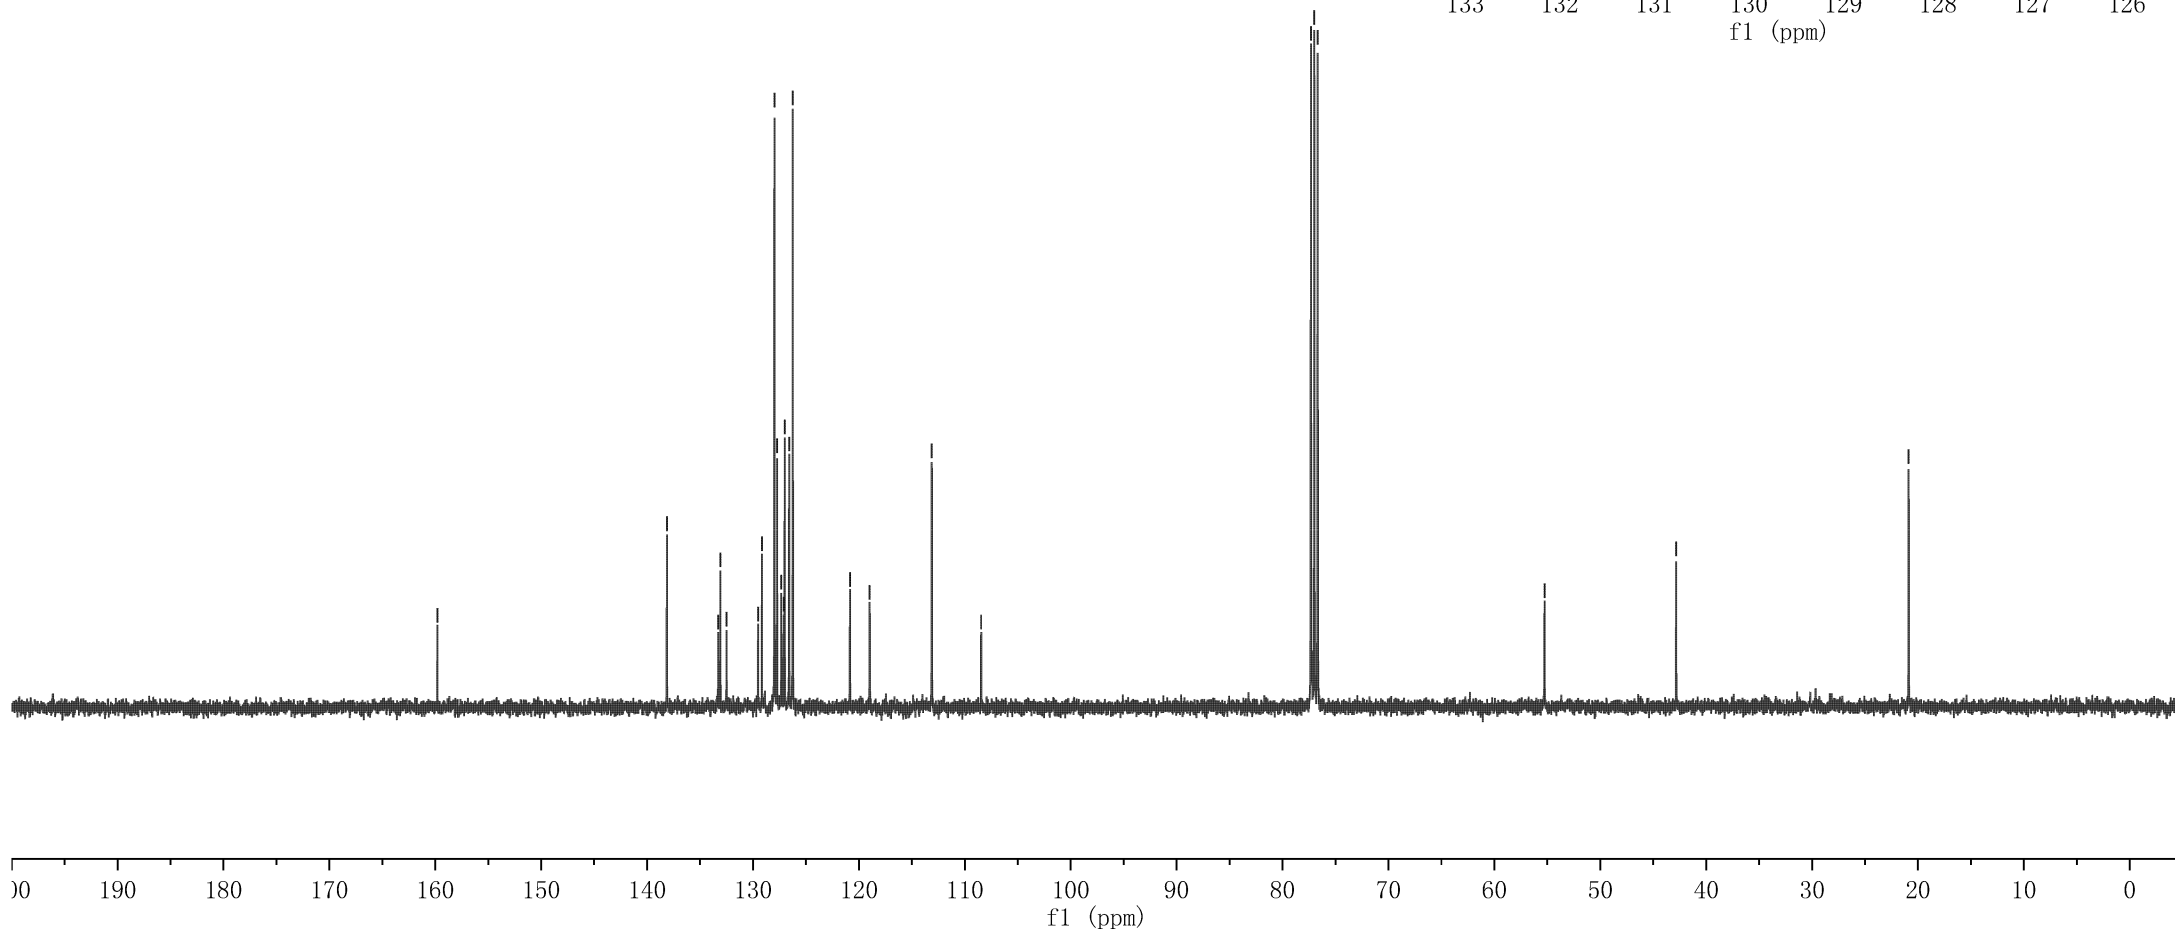

7.521  
7.517  
7.513  
7.431  
7.411  
7.393  
7.374  
7.320  
7.311  
7.307  
7.300  
7.295  
7.259  
7.255  
7.247  
7.242  
7.234  
7.230  
7.163  
7.157  
7.134  
7.115  
7.095  
7.047  
7.028  
7.010  
6.916  
6.910  
6.892  
6.873

| Parameter                | Value               |
|--------------------------|---------------------|
| 1 Title                  | XHJ-2-45-H          |
| 2 Origin                 | Bruker BioSpin GmbH |
| 3 Solvent                | CDC13               |
| 4 Temperature            | 298.0               |
| 5 Number of Scans        | 7                   |
| 6 Acquisition Time       | 4.0894              |
| 7 Acquisition Date       | 2022-04-29T20:32:47 |
| 8 Spectrometer Frequency | 400.13              |
| 9 Spectral Width         | 8012.8              |

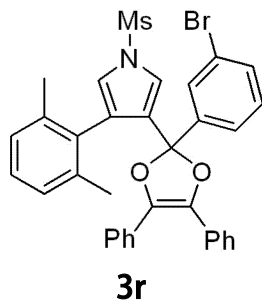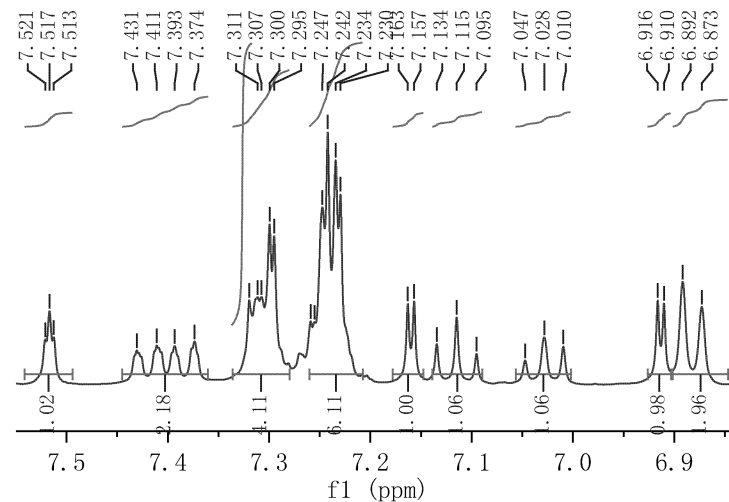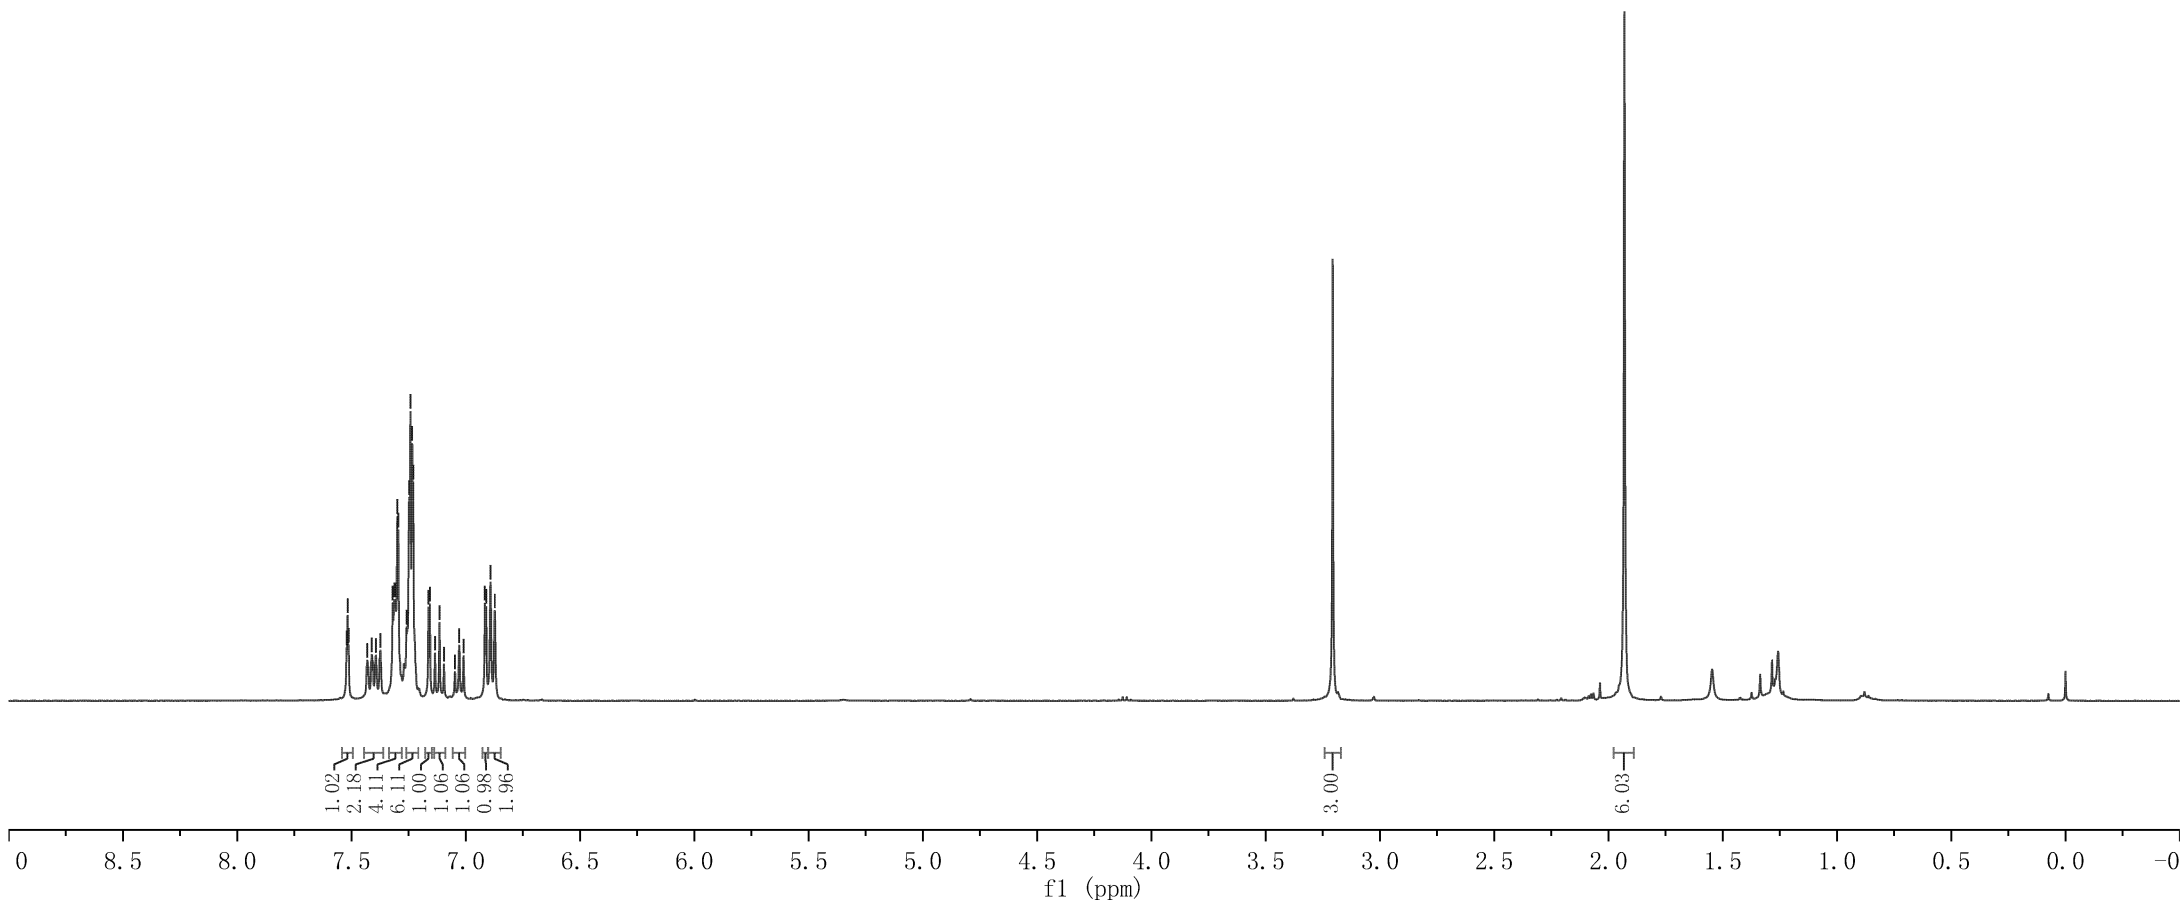

| Parameter                | Value               |
|--------------------------|---------------------|
| 1 Title                  | XHJ-2-45-C          |
| 2 Origin                 | Bruker BioSpin GmbH |
| 3 Solvent                | CDC13               |
| 4 Temperature            | 300.0               |
| 5 Number of Scans        | 53                  |
| 6 Acquisition Time       | 1.3631              |
| 7 Acquisition Date       | 2022-04-29T20:34:08 |
| 8 Spectrometer Frequency | 100.61              |
| 9 Spectral Width         | 24038.5             |

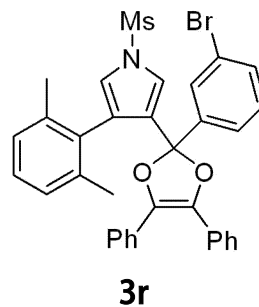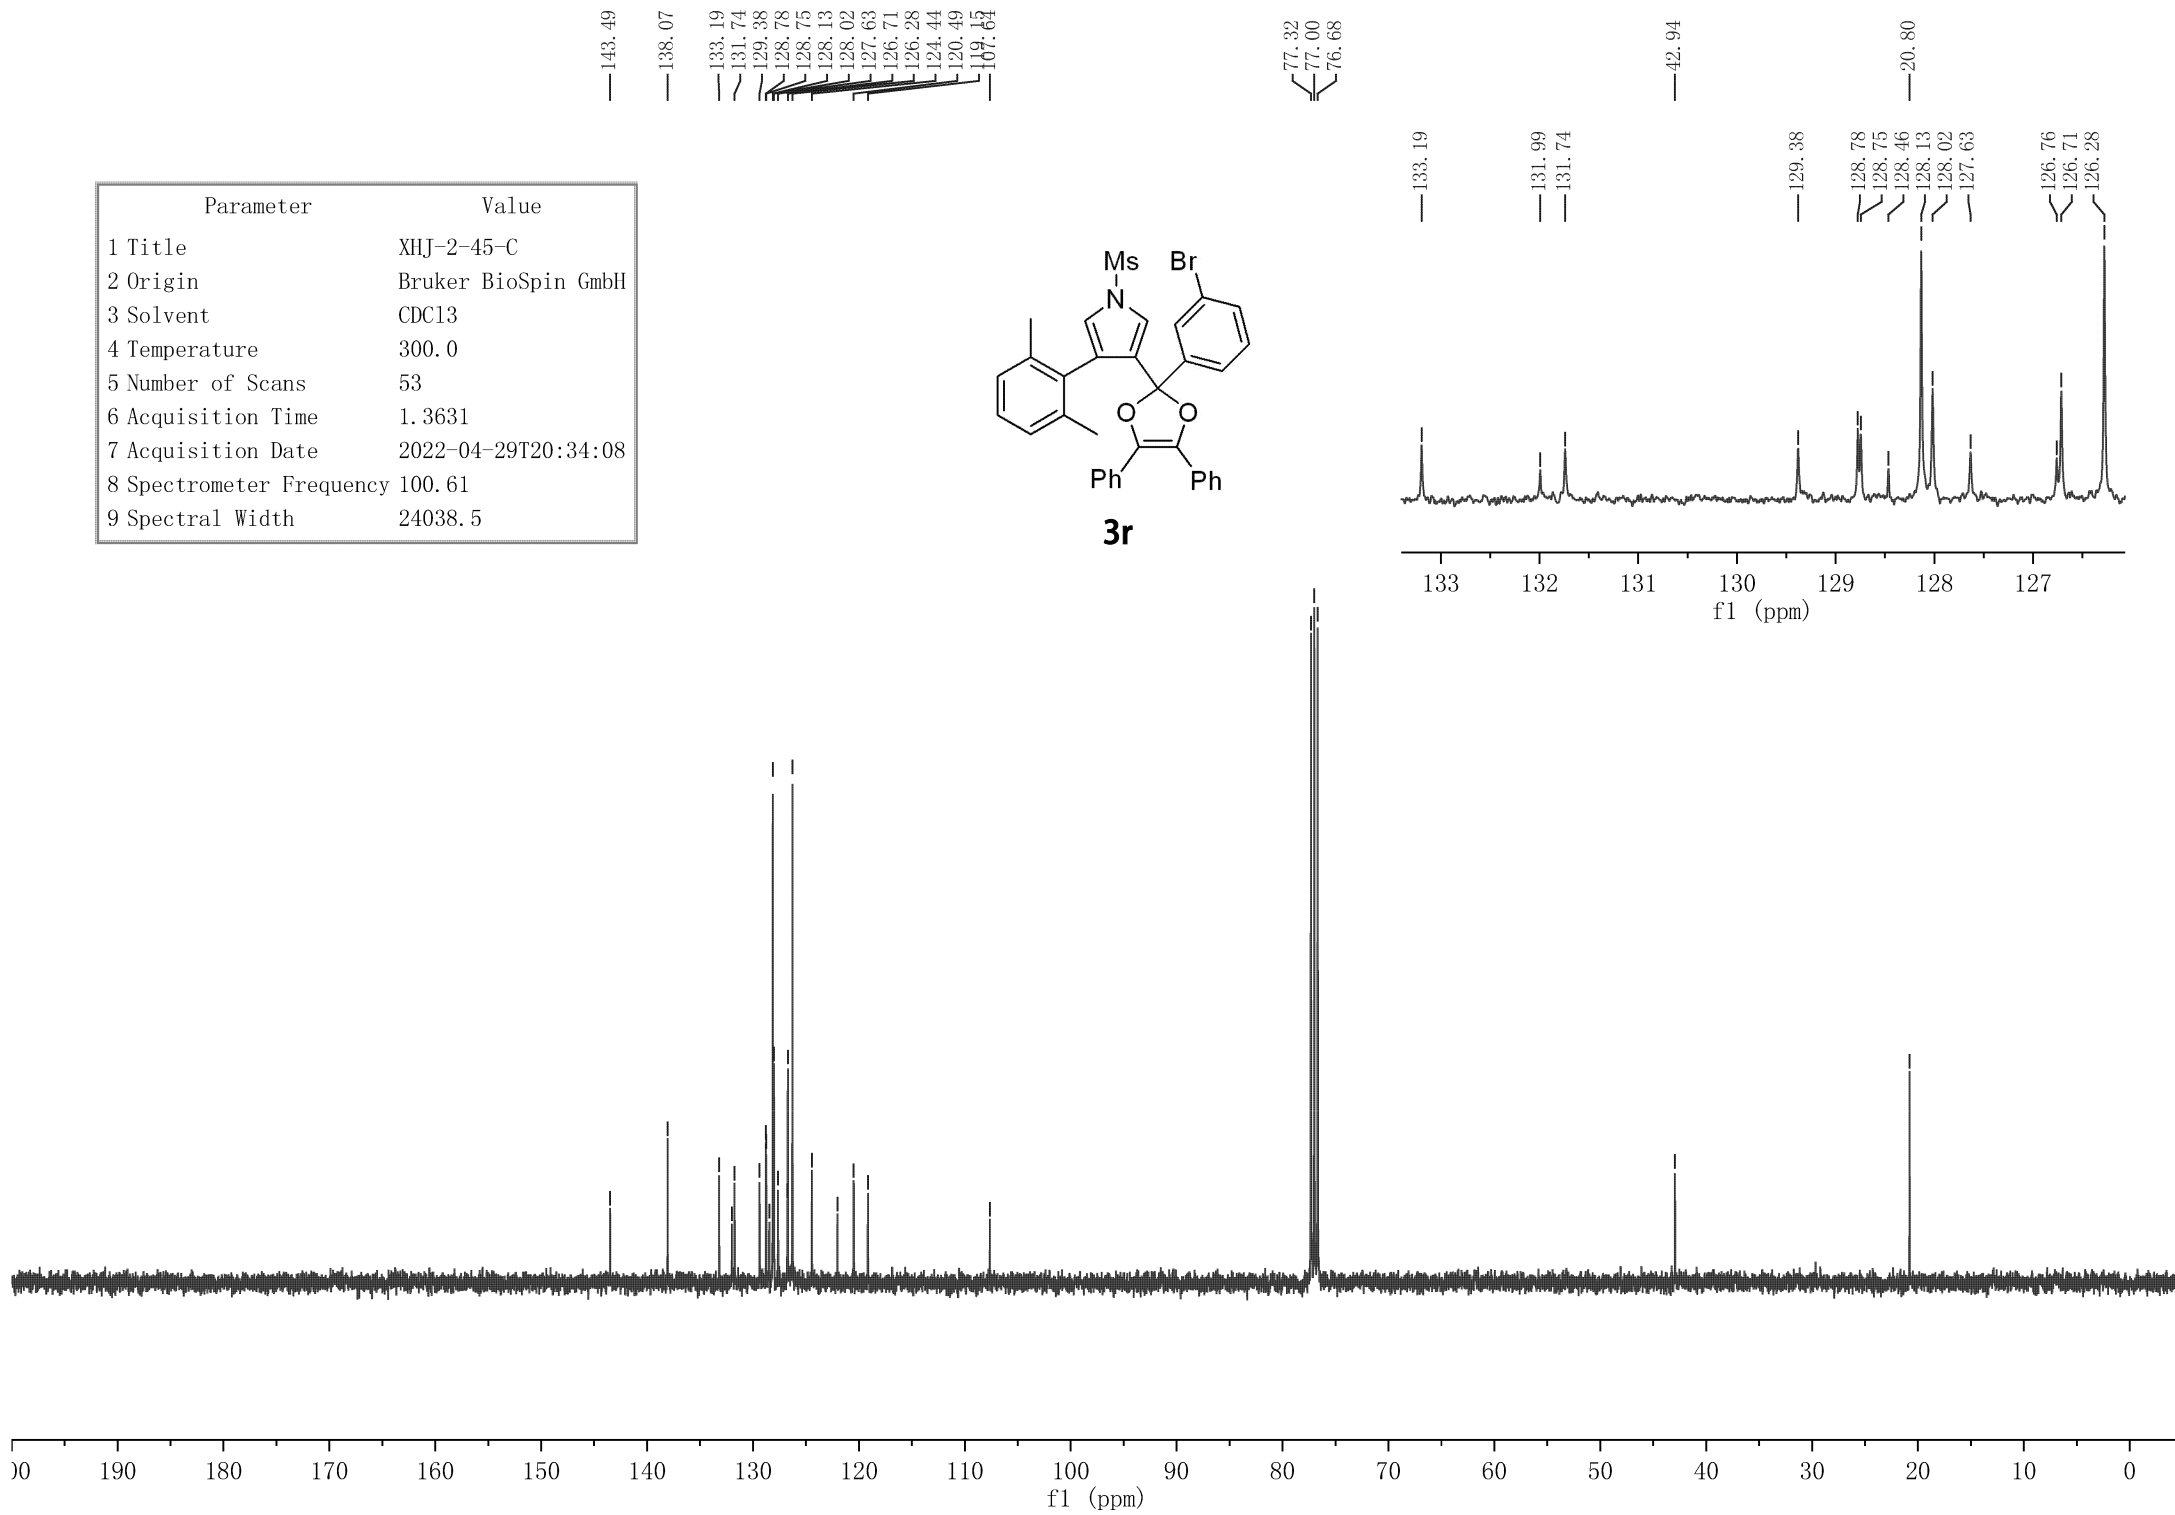

7.314  
7.309  
7.299  
7.294  
7.290  
7.246  
7.242  
7.237  
7.229  
7.224  
7.209  
7.206  
7.197  
7.193  
7.173  
7.154  
7.135  
7.106  
7.099  
7.093  
7.018  
6.999  
6.980  
6.894  
6.888  
6.867  
6.849

| Parameter                | Value               |
|--------------------------|---------------------|
| 1 Title                  | XHJ-2-58-H          |
| 2 Origin                 | Bruker BioSpin GmbH |
| 3 Solvent                | CDC13               |
| 4 Temperature            | 298.0               |
| 5 Number of Scans        | 9                   |
| 6 Acquisition Time       | 4.0894              |
| 7 Acquisition Date       | 2022-05-10T14:29:39 |
| 8 Spectrometer Frequency | 400.13              |
| 9 Spectral Width         | 8012.8              |

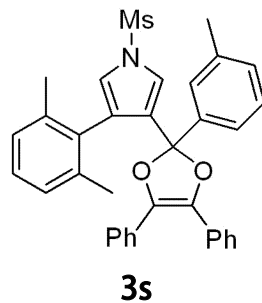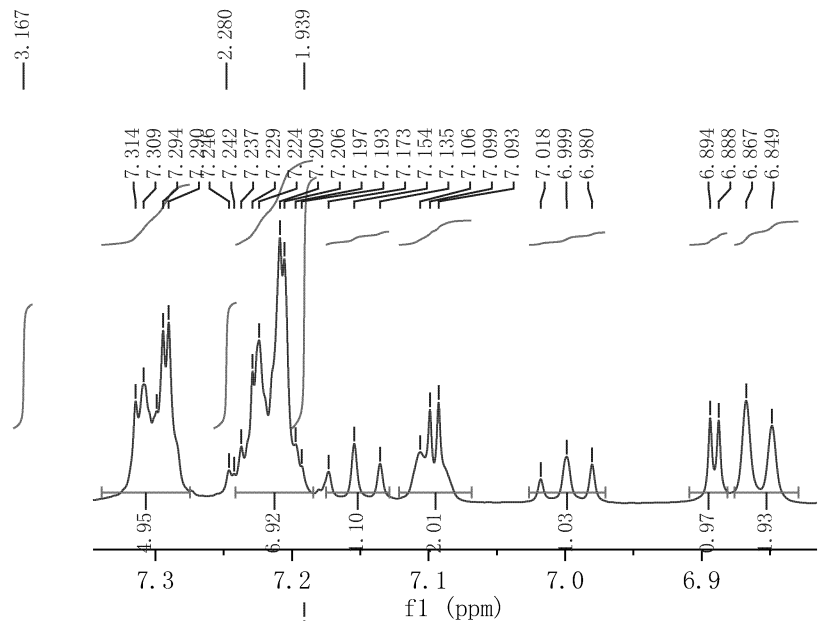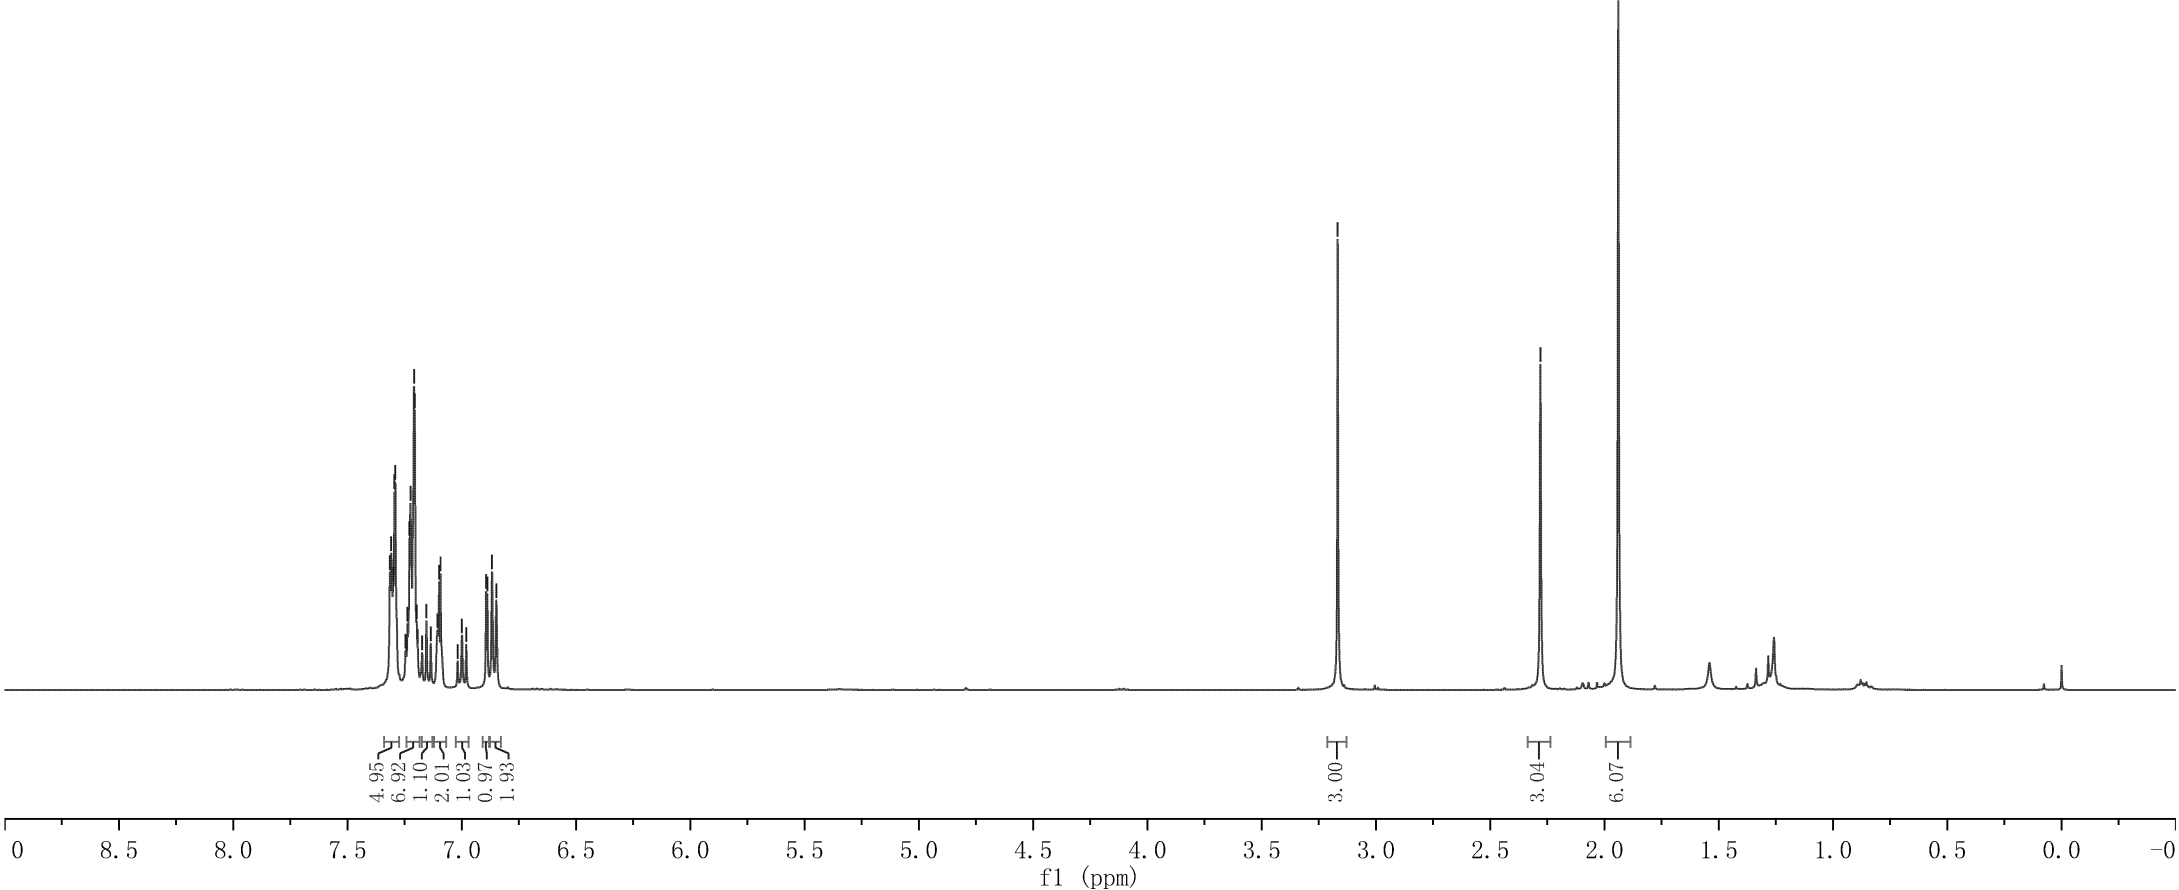

| Parameter                | Value               |
|--------------------------|---------------------|
| 1 Title                  | XHJ-2-58-C          |
| 2 Origin                 | Bruker BioSpin GmbH |
| 3 Solvent                | CDC13               |
| 4 Temperature            | 300.0               |
| 5 Number of Scans        | 56                  |
| 6 Acquisition Time       | 1.3631              |
| 7 Acquisition Date       | 2022-05-10T14:31:21 |
| 8 Spectrometer Frequency | 100.61              |
| 9 Spectral Width         | 24038.5             |

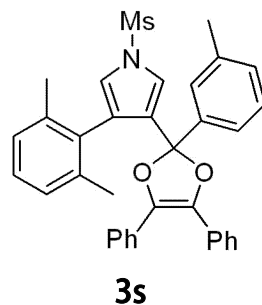

140.97  
138.18  
137.27  
133.15  
129.15  
128.00  
127.75  
127.63  
127.35  
126.58  
126.28  
126.20  
122.85  
120.66  
118.50

77.32  
77.00  
76.68

42.84

21.49  
20.81

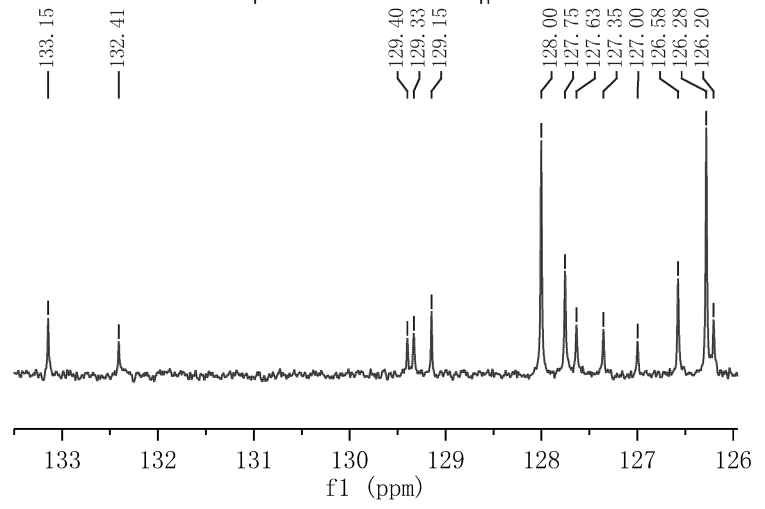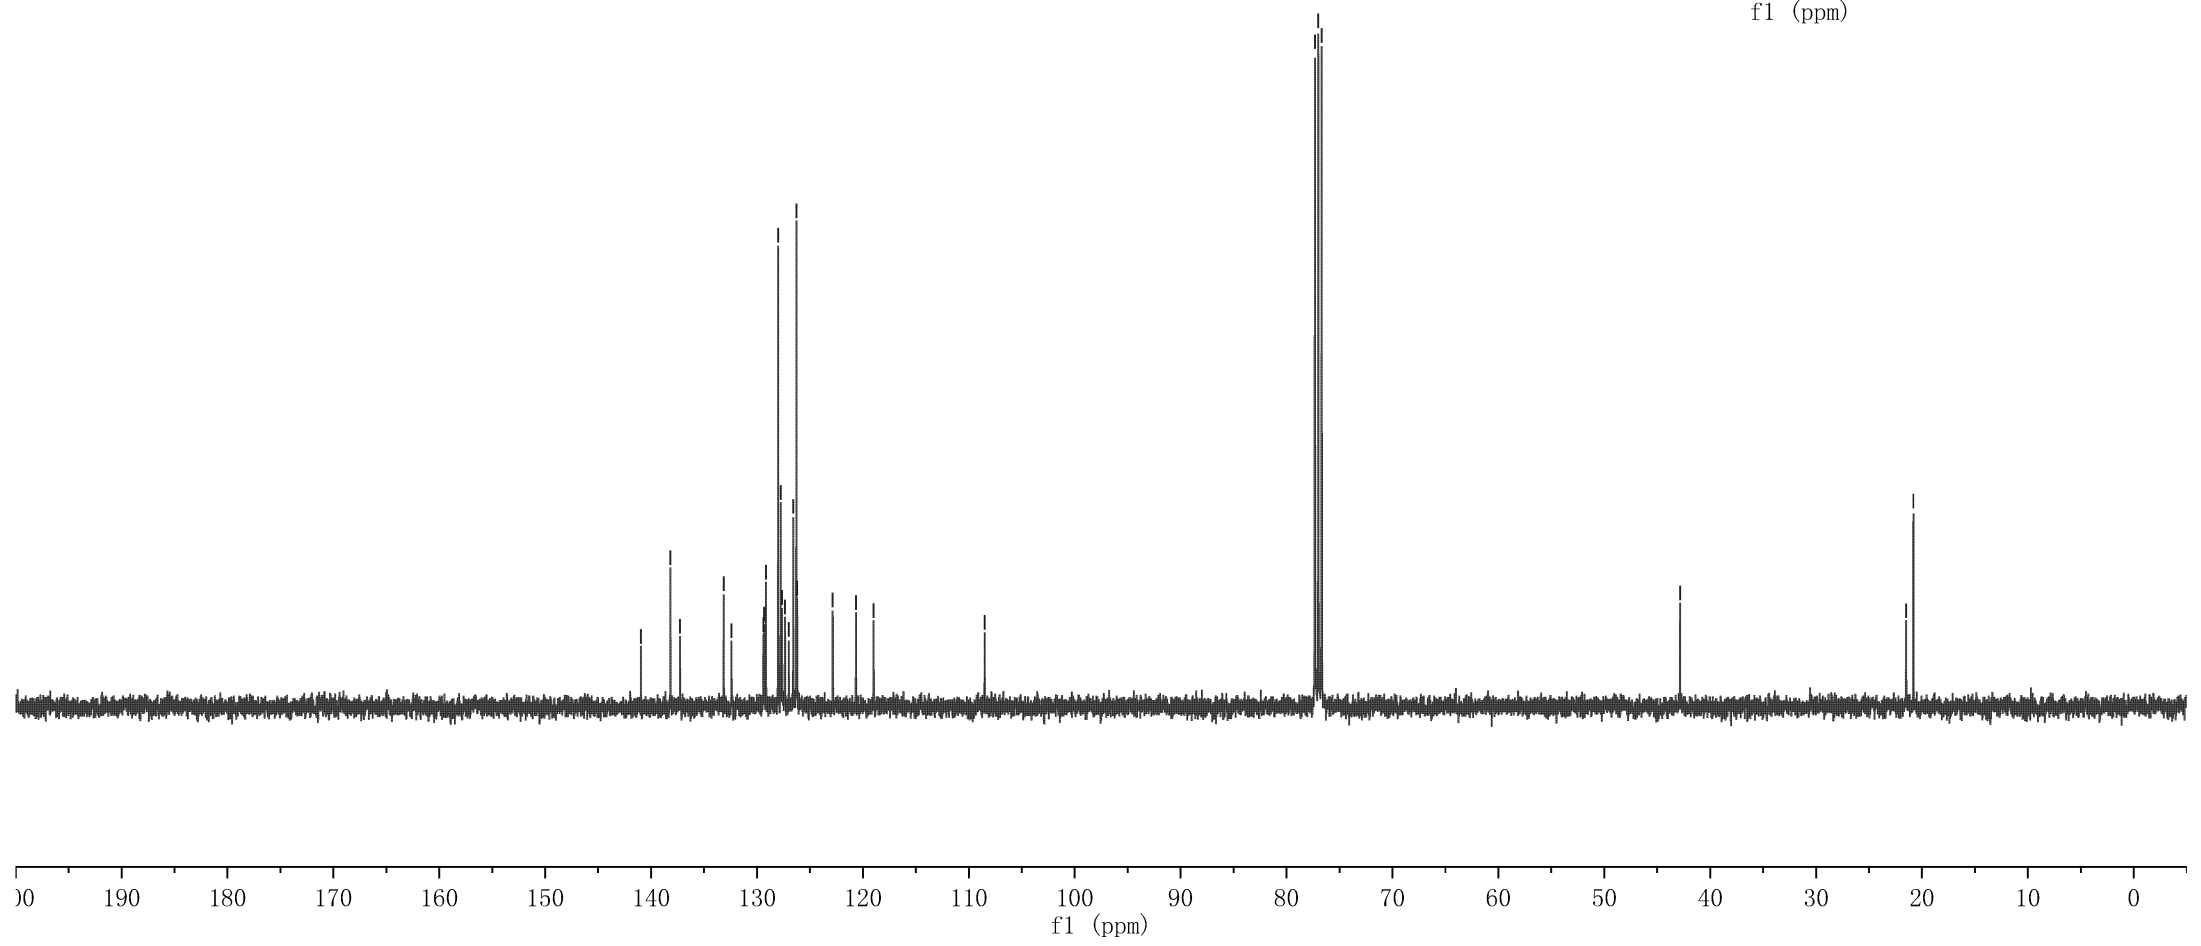

7.604  
7.601  
7.585  
7.582  
7.483  
7.478  
7.464  
7.459  
7.349  
7.343  
7.329  
7.325  
7.247  
7.241  
7.226  
7.222  
7.215  
7.185  
7.180  
7.166  
7.162  
7.148  
7.142  
7.133  
7.126  
7.117  
7.114  
7.098  
6.954  
6.934  
6.927  
6.916  
6.803  
6.784

| Parameter                | Value               |
|--------------------------|---------------------|
| 1 Title                  | XHJ-2-44-H-2        |
| 2 Origin                 | Bruker BioSpin GmbH |
| 3 Solvent                | CDCl3               |
| 4 Temperature            | 298.0               |
| 5 Number of Scans        | 4                   |
| 6 Acquisition Time       | 4.0894              |
| 7 Acquisition Date       | 2022-05-12T14:01:58 |
| 8 Spectrometer Frequency | 400.13              |
| 9 Spectral Width         | 8012.8              |

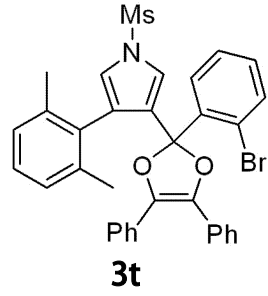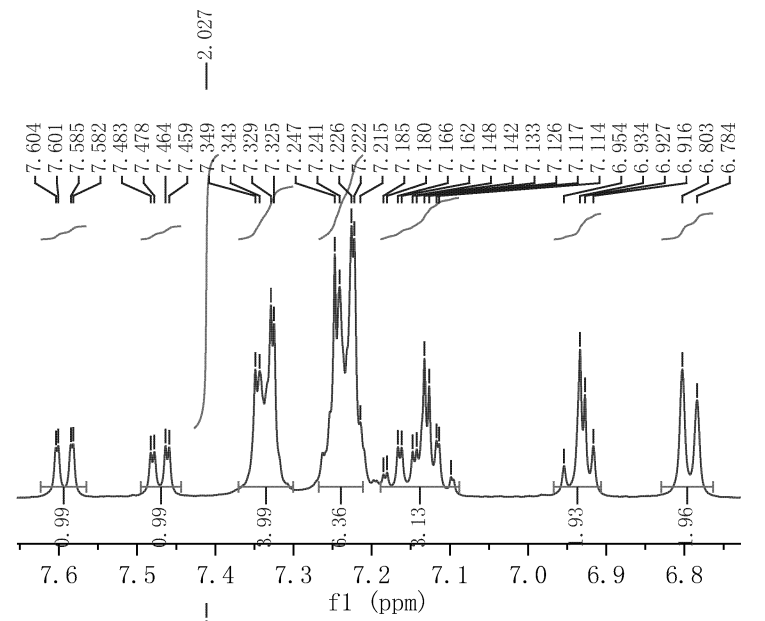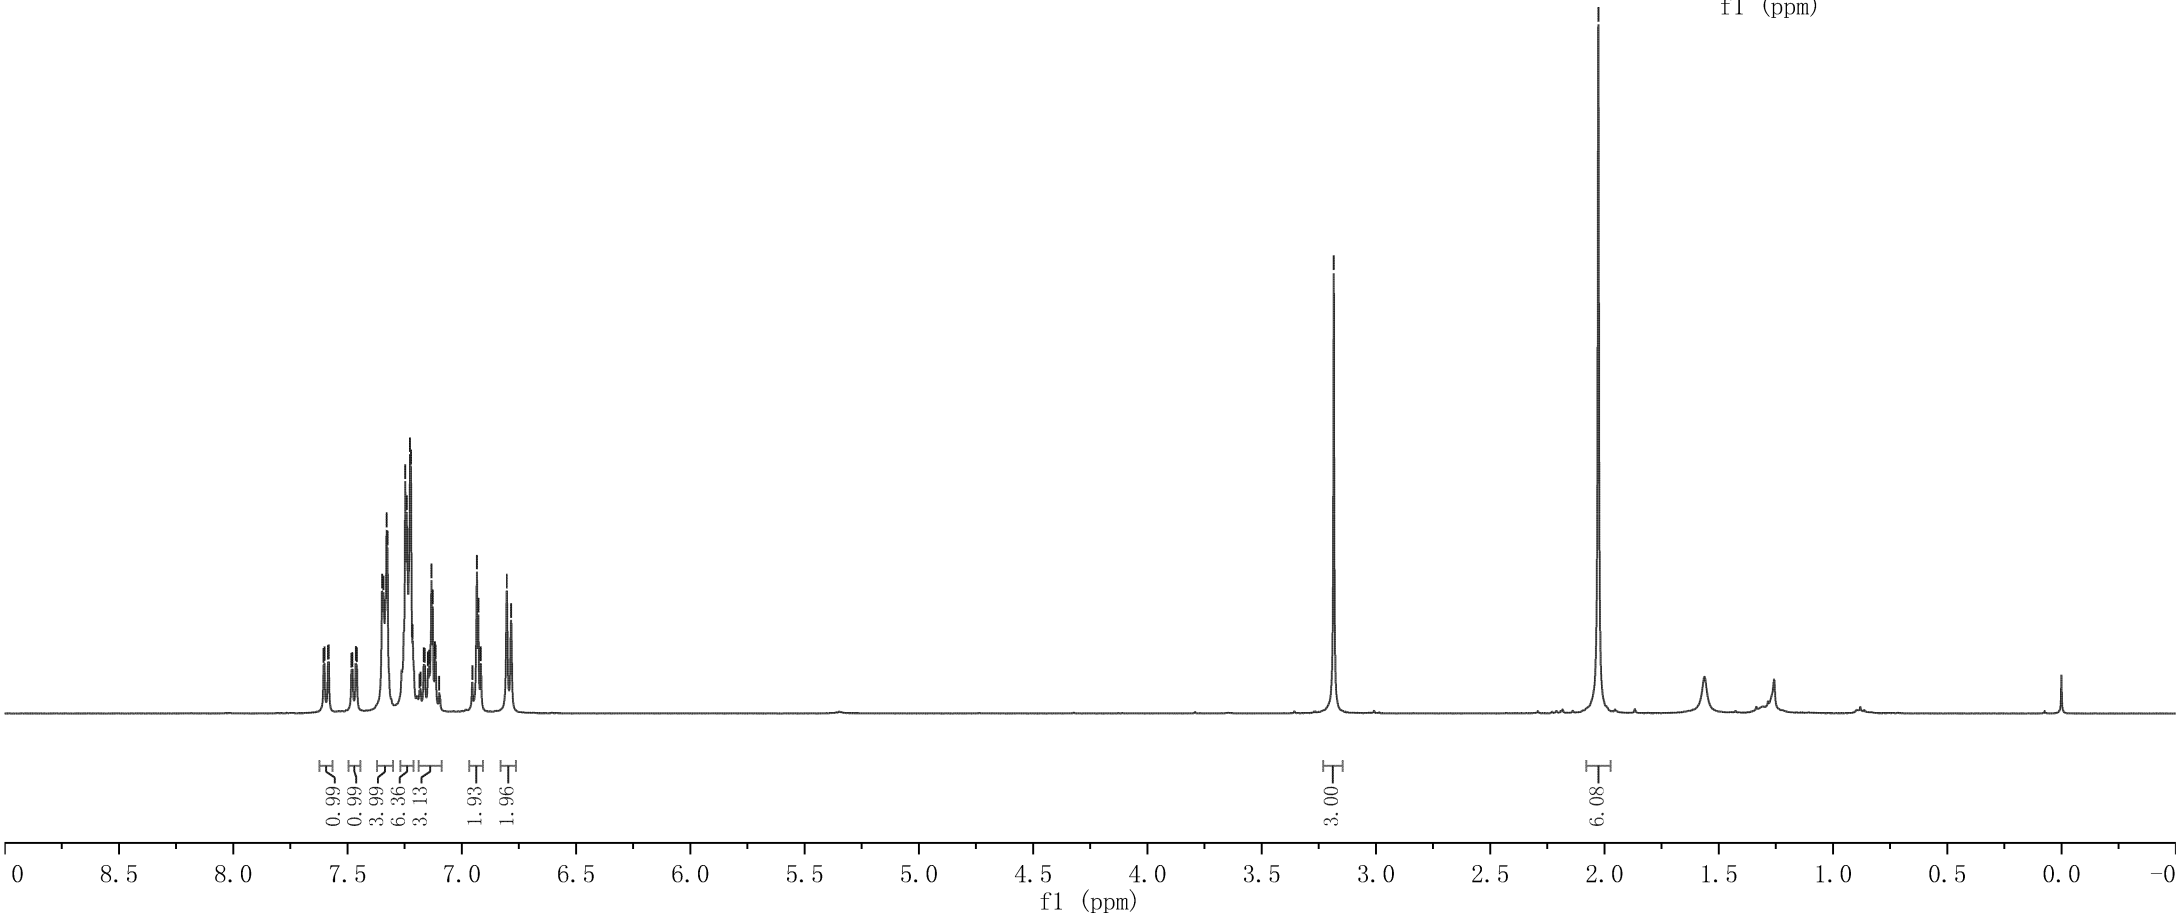

| Parameter                | Value               |
|--------------------------|---------------------|
| 1 Title                  | XHJ-2-44-C-2        |
| 2 Origin                 | Bruker BioSpin GmbH |
| 3 Solvent                | CDC13               |
| 4 Temperature            | 300.0               |
| 5 Number of Scans        | 77                  |
| 6 Acquisition Time       | 1.3631              |
| 7 Acquisition Date       | 2022-05-12T14:03:04 |
| 8 Spectrometer Frequency | 100.61              |
| 9 Spectral Width         | 24038.5             |

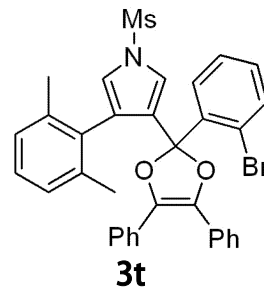

139.00  
138.16  
134.74  
133.16  
132.09  
130.31  
128.84  
128.06  
127.93  
127.88  
127.33  
127.28  
126.75  
126.67  
126.58  
126.29  
122.24  
121.32  
119.04  
108.04

77.32  
77.00  
76.68

42.90

20.91

128.06

127.93

127.88

127.33

127.28

126.75

126.67

126.58

126.29

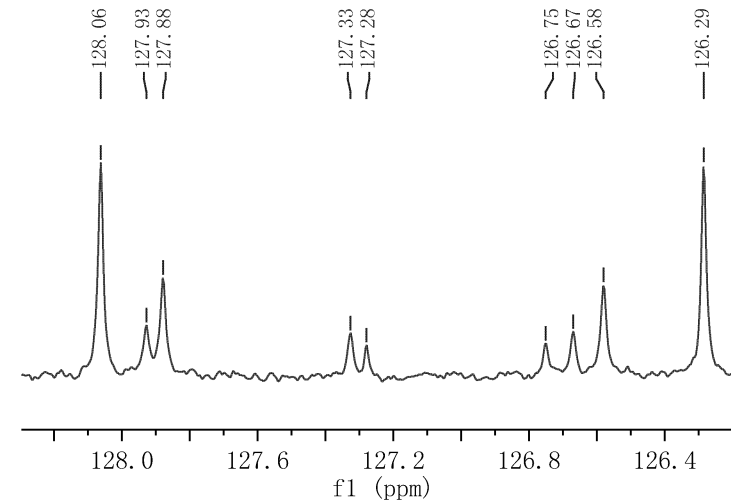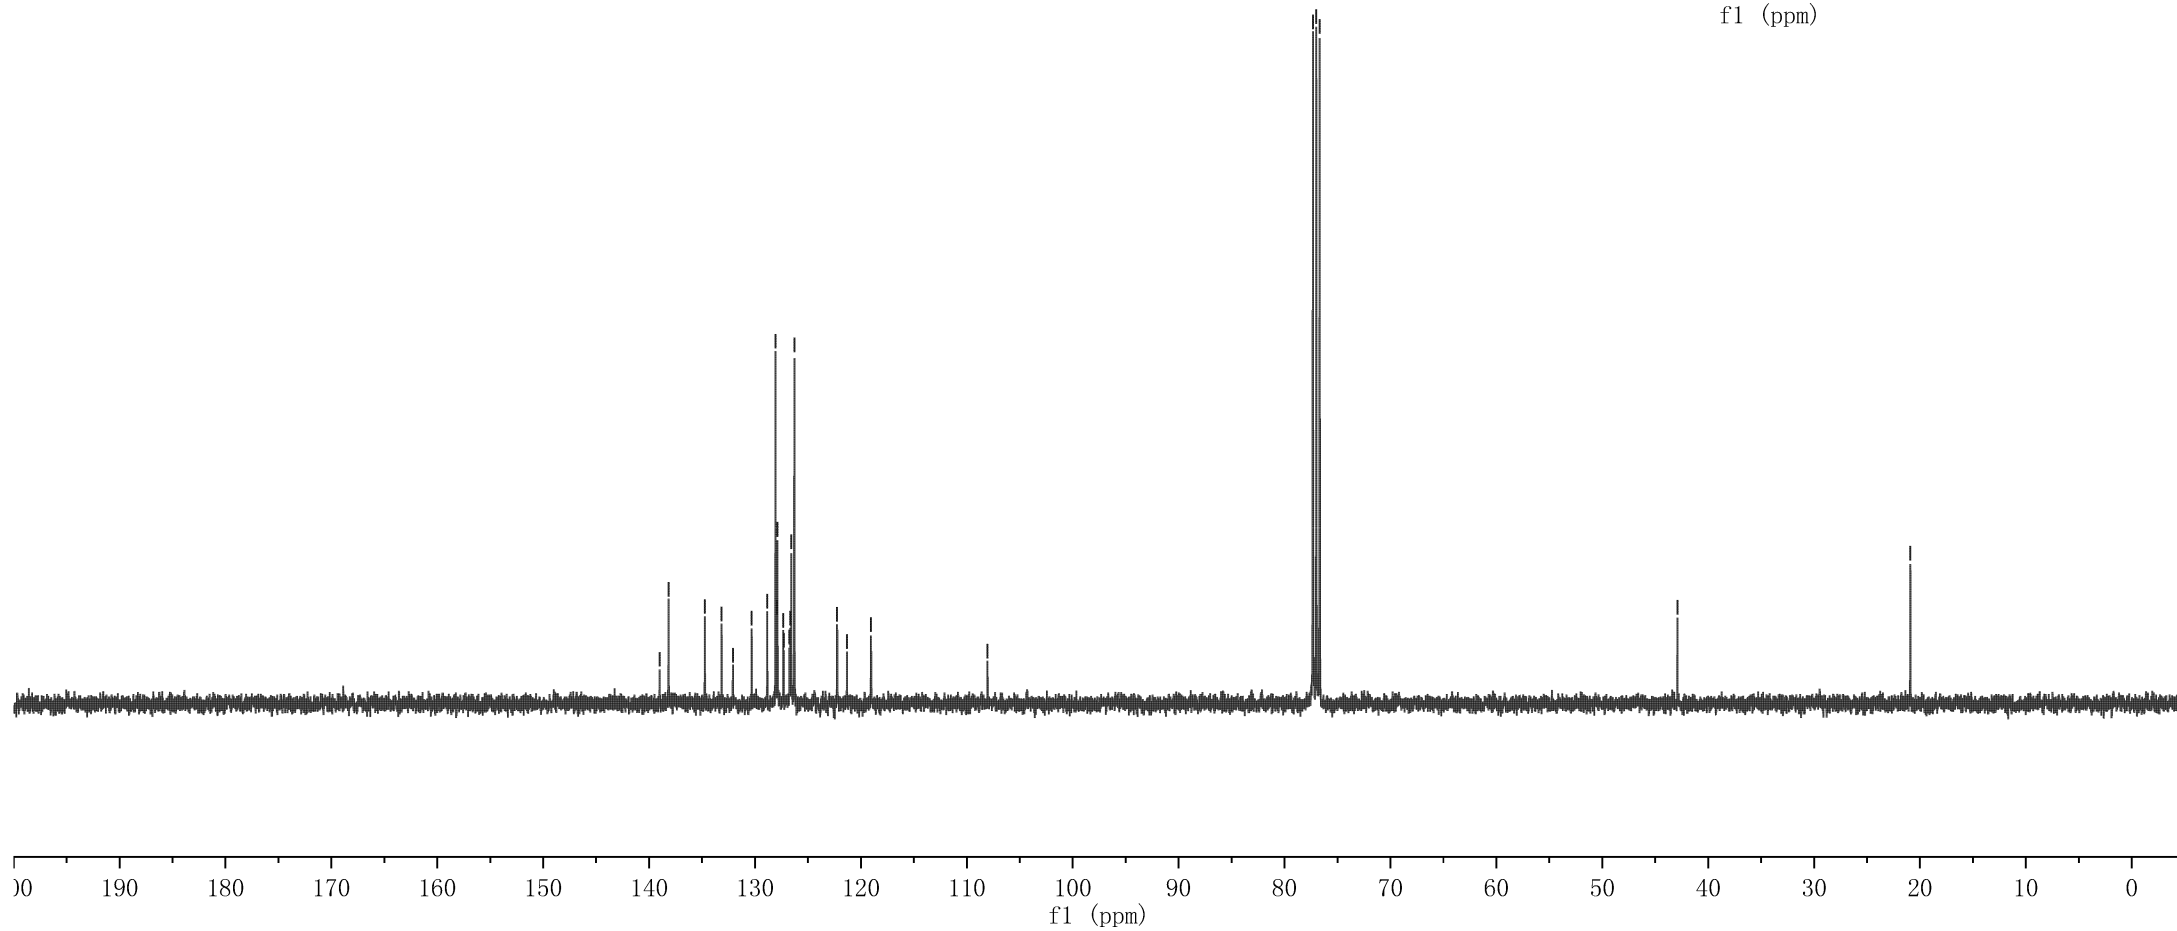

| Parameter                | Value               |
|--------------------------|---------------------|
| 1 Title                  | XHJ-2-59-H-2        |
| 2 Origin                 | Bruker BioSpin GmbH |
| 3 Solvent                | CDC13               |
| 4 Temperature            | 298.0               |
| 5 Number of Scans        | 7                   |
| 6 Acquisition Time       | 4.0894              |
| 7 Acquisition Date       | 2022/05-11T20:56:14 |
| 8 Spectrometer Frequency | 400.13              |
| 9 Spectral Width         | 8012.8              |

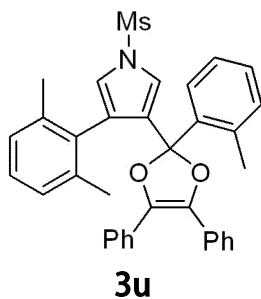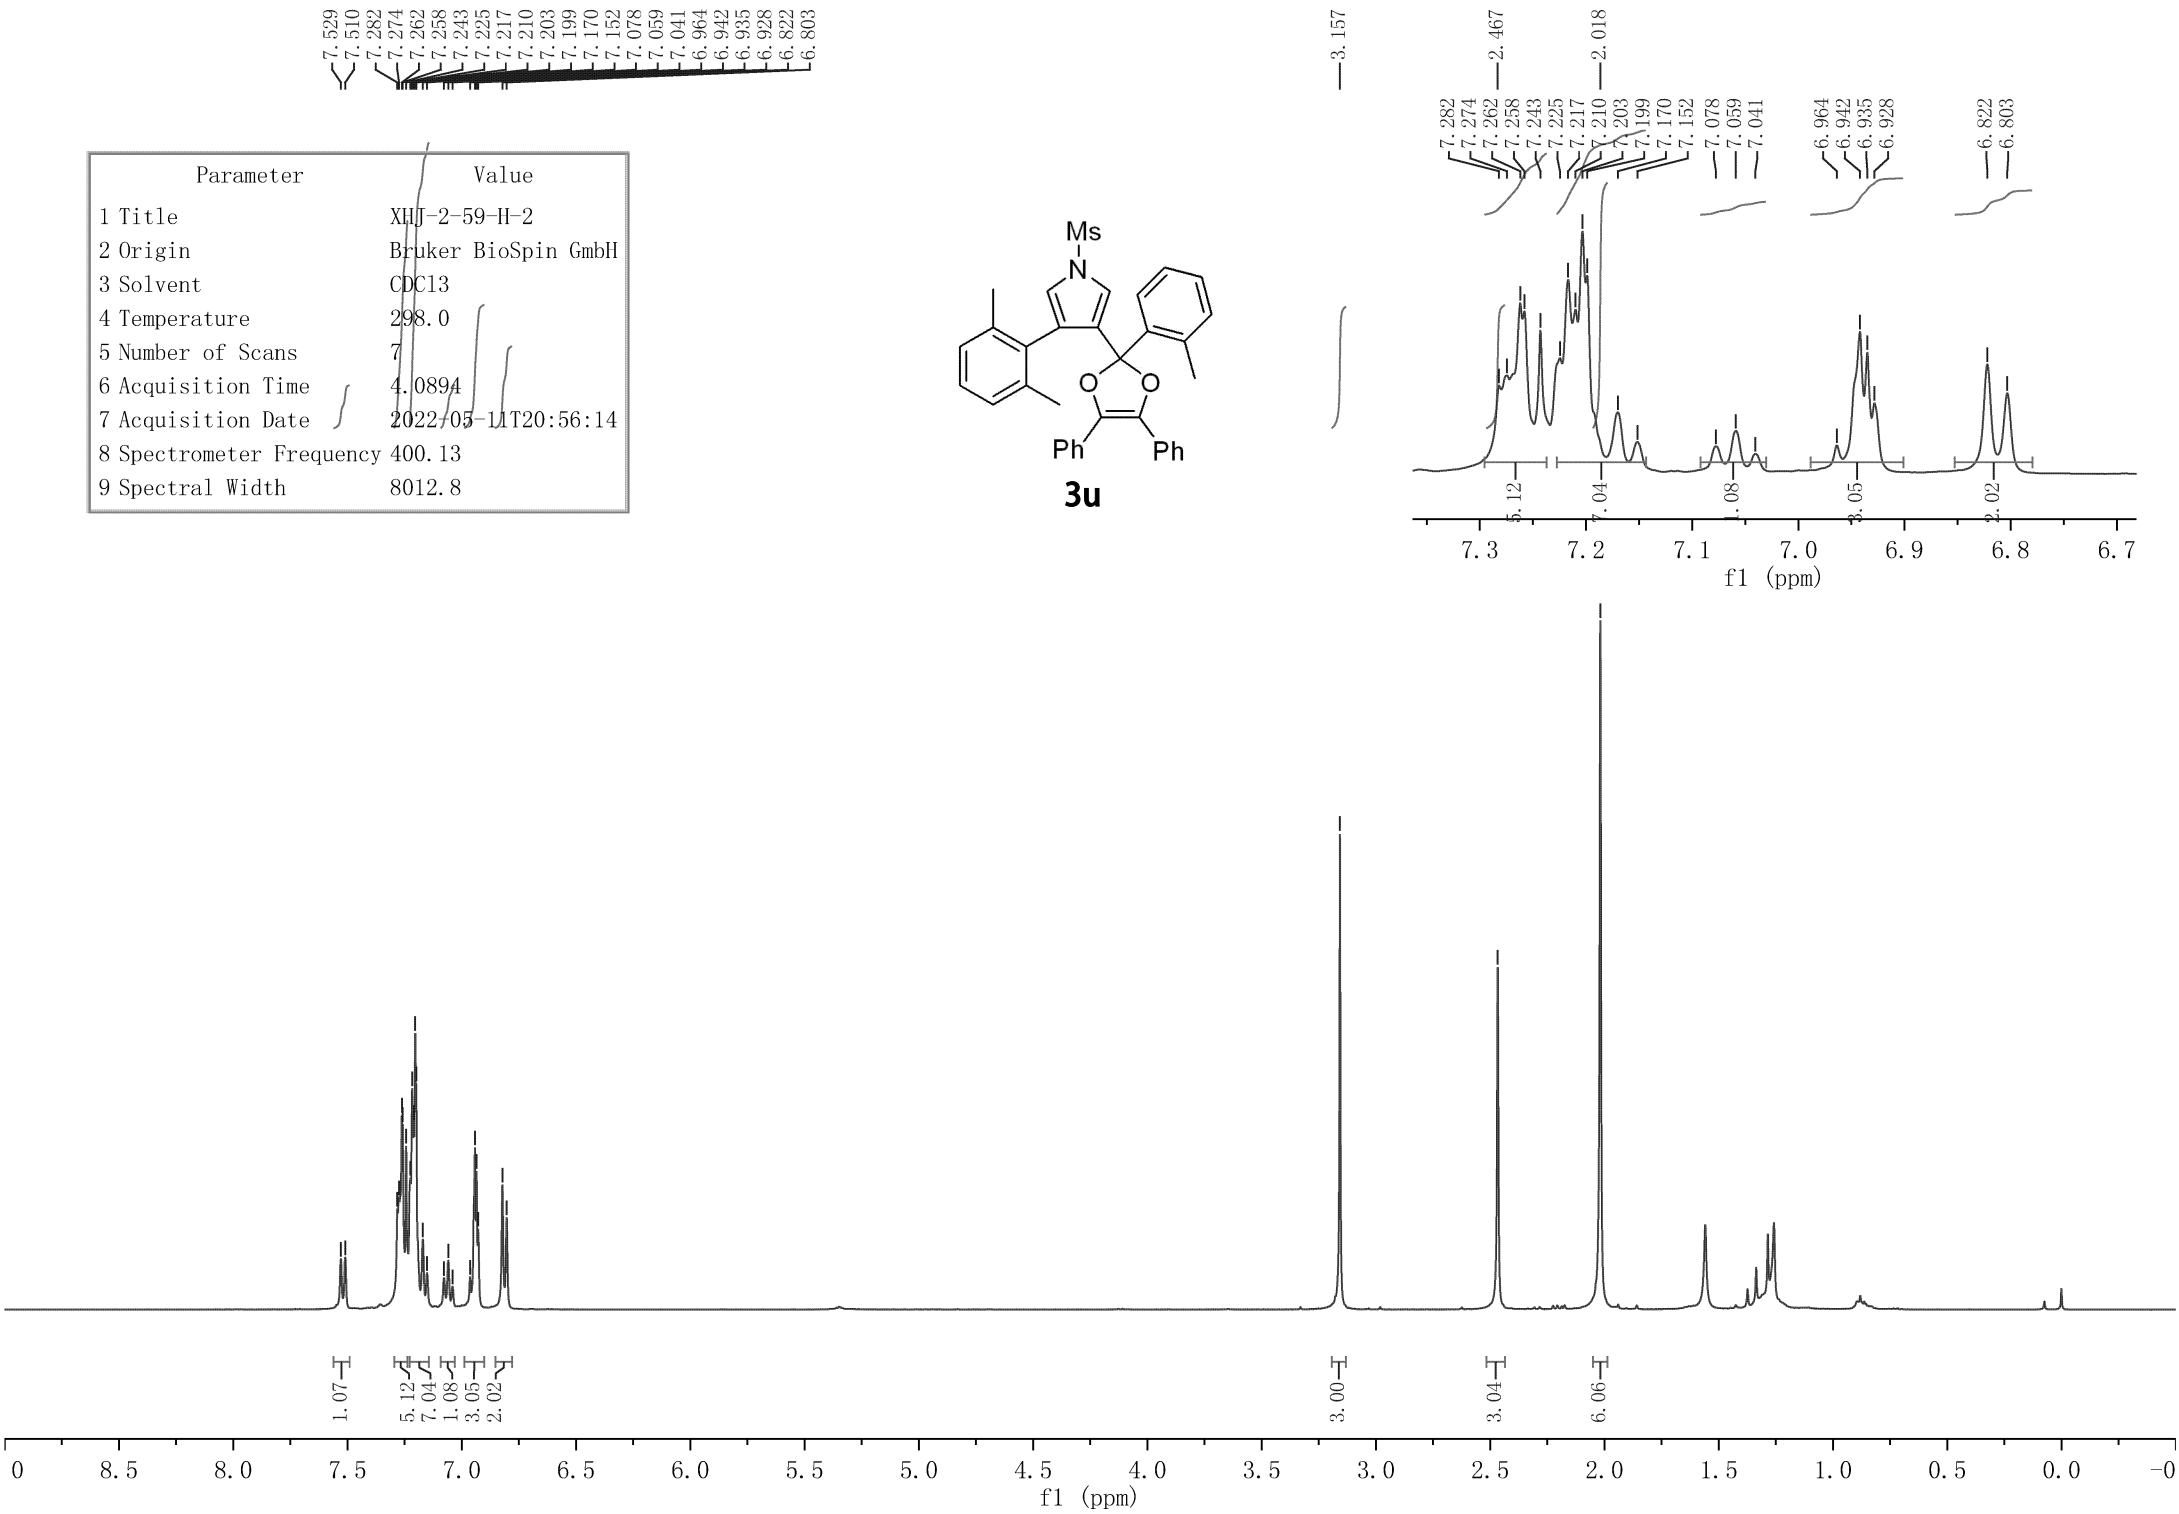



| Parameter                | Value               |
|--------------------------|---------------------|
| 1 Title                  | XHJ-2-59-C-2        |
| 2 Origin                 | Bruker BioSpin GmbH |
| 3 Solvent                | CDCl3               |
| 4 Temperature            | 300.0               |
| 5 Number of Scans        | 40                  |
| 6 Acquisition Time       | 1.3631              |
| 7 Acquisition Date       | 2022-05-11T20:57:31 |
| 8 Spectrometer Frequency | 100.61              |
| 9 Spectral Width         | 24038.5             |

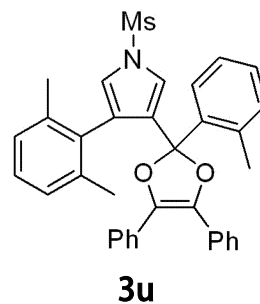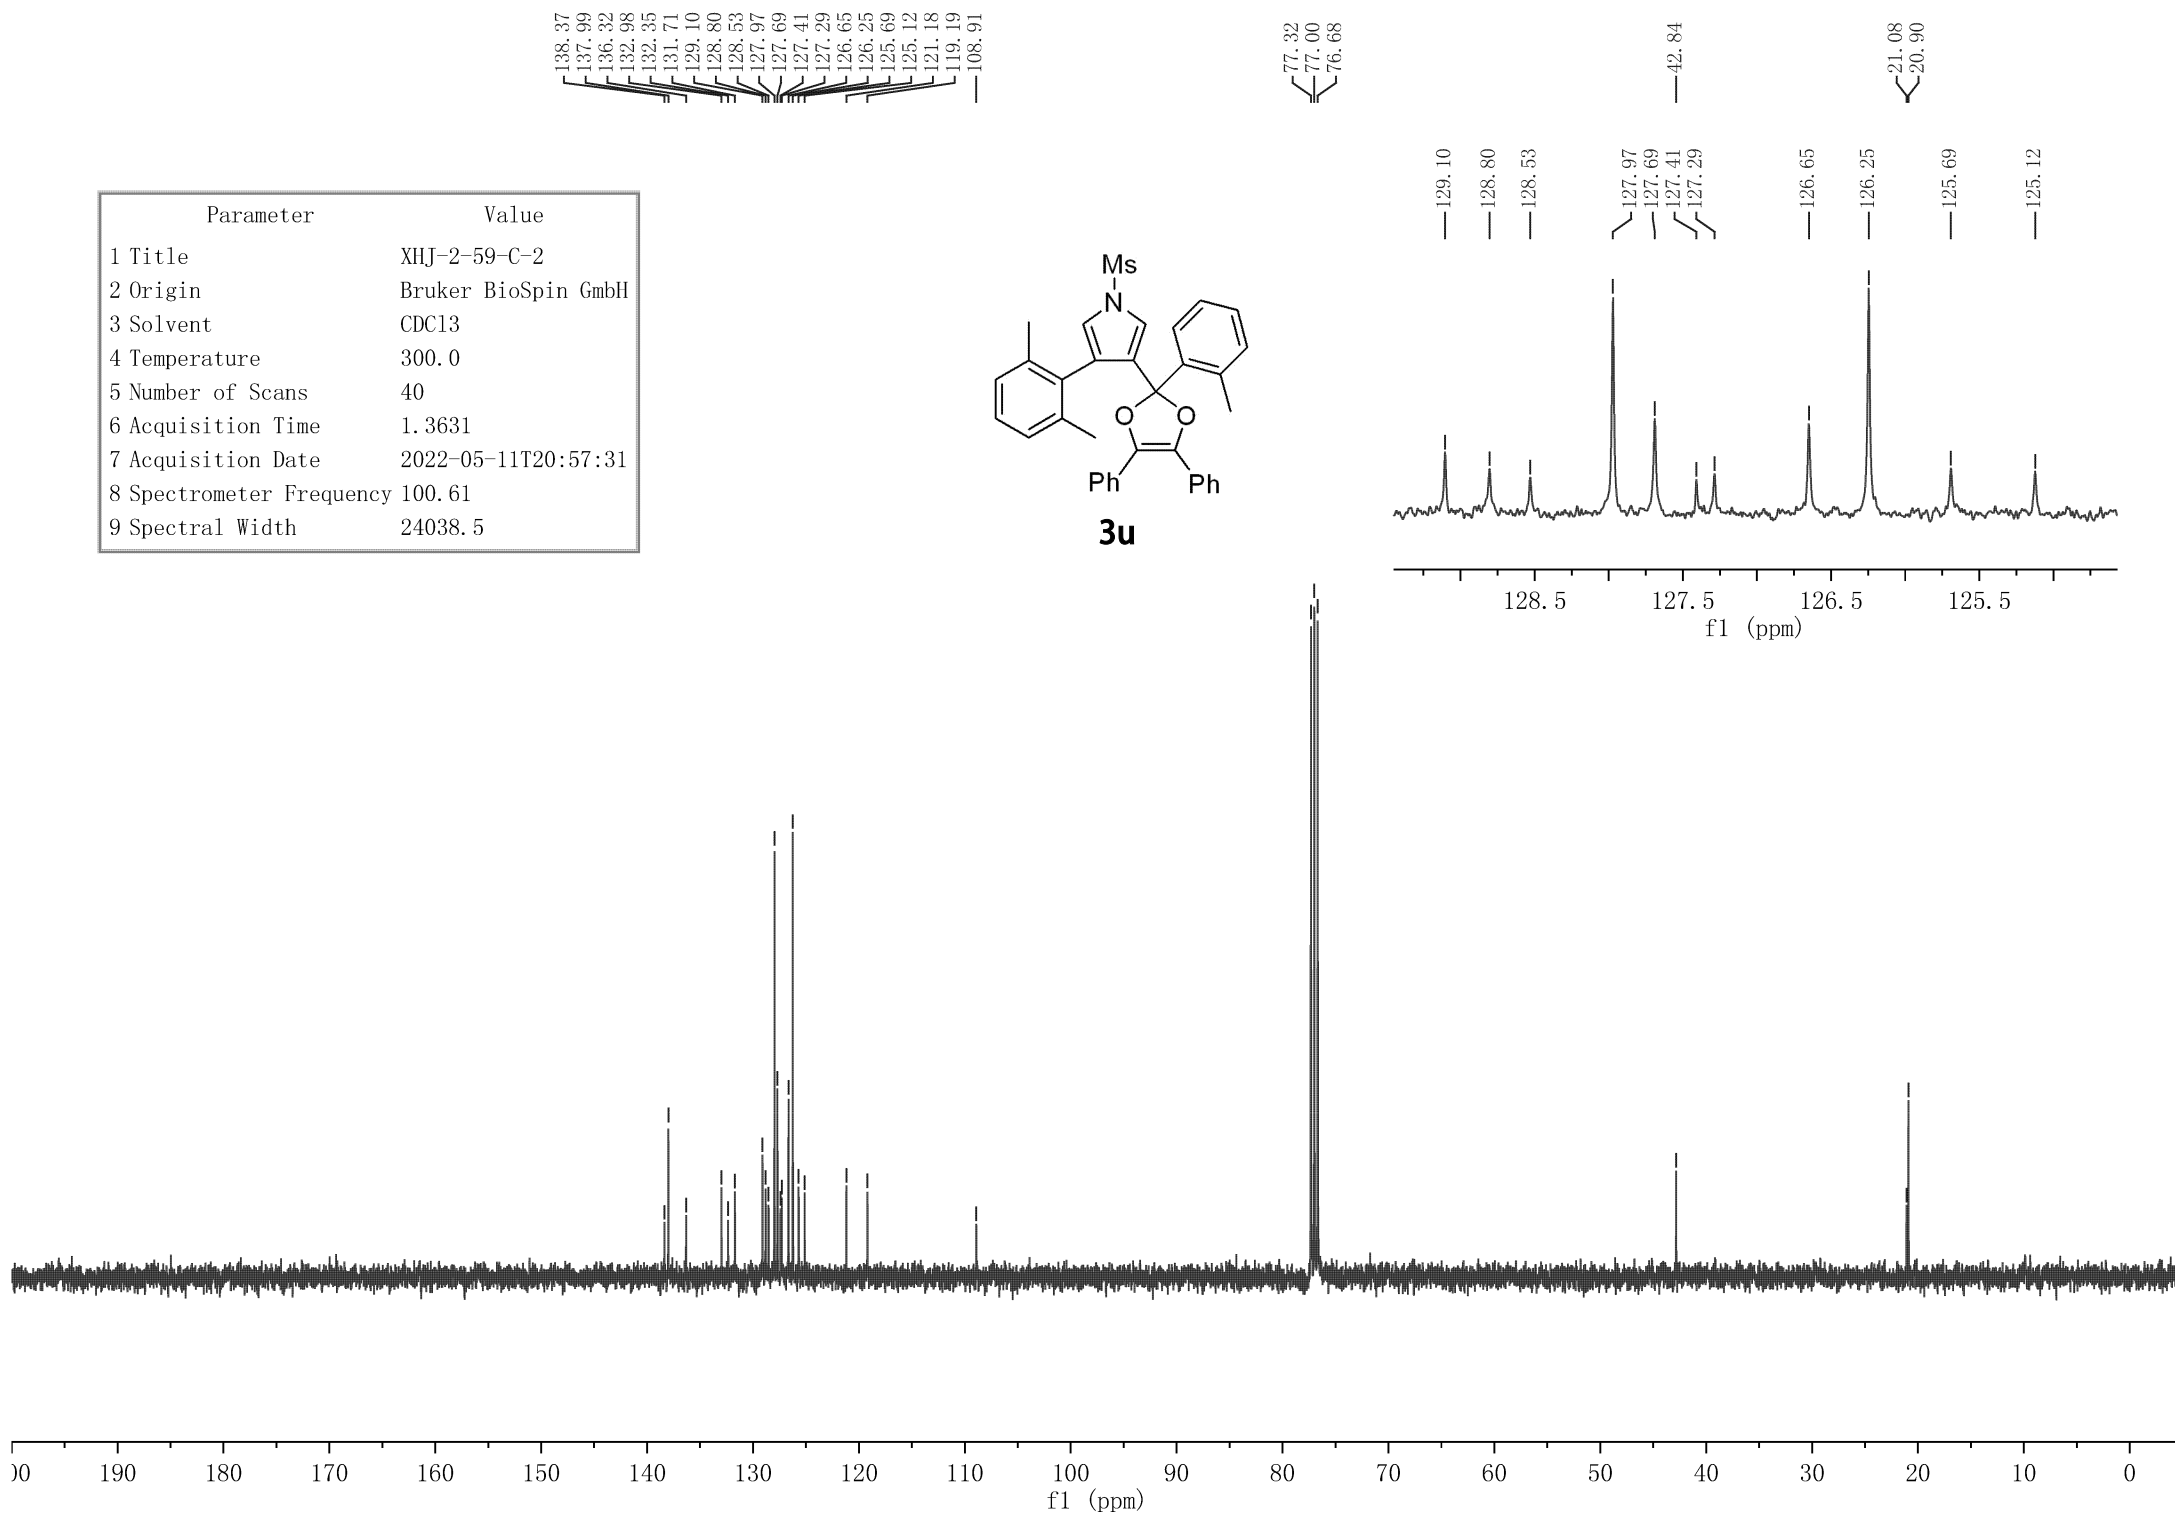

7.289  
7.277  
7.269  
7.264  
7.234  
7.232  
7.221  
7.209  
7.205  
7.198  
7.192  
7.131  
7.126  
7.120  
7.115  
7.017  
6.998  
6.979  
6.922  
6.916  
6.880  
6.861

| Parameter                | Value               |
|--------------------------|---------------------|
| 1 Title                  | XHJ-2-48-H          |
| 2 Origin                 | Bruker BioSpin GmbH |
| 3 Solvent                | CDC13               |
| 4 Temperature            | 298.0               |
| 5 Number of Scans        | 6                   |
| 6 Acquisition Time       | 4.0894              |
| 7 Acquisition Date       | 2022-04-30T10:19:48 |
| 8 Spectrometer Frequency | 400.13              |
| 9 Spectral Width         | 8012.8              |

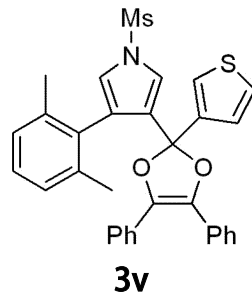

3.188

1.980

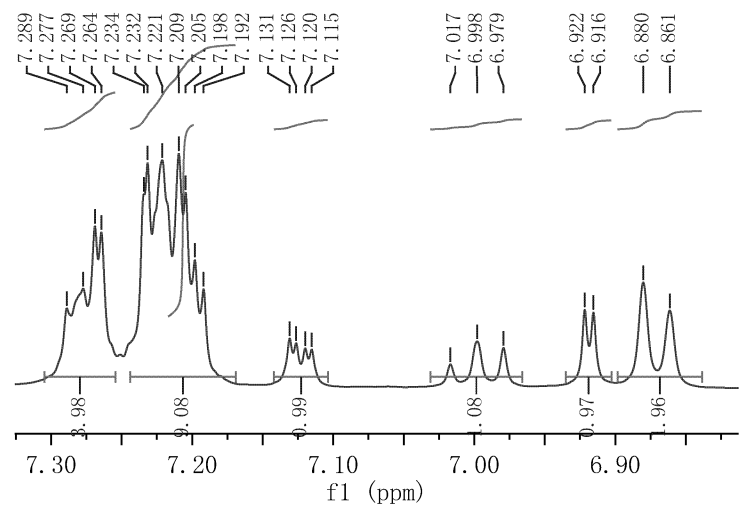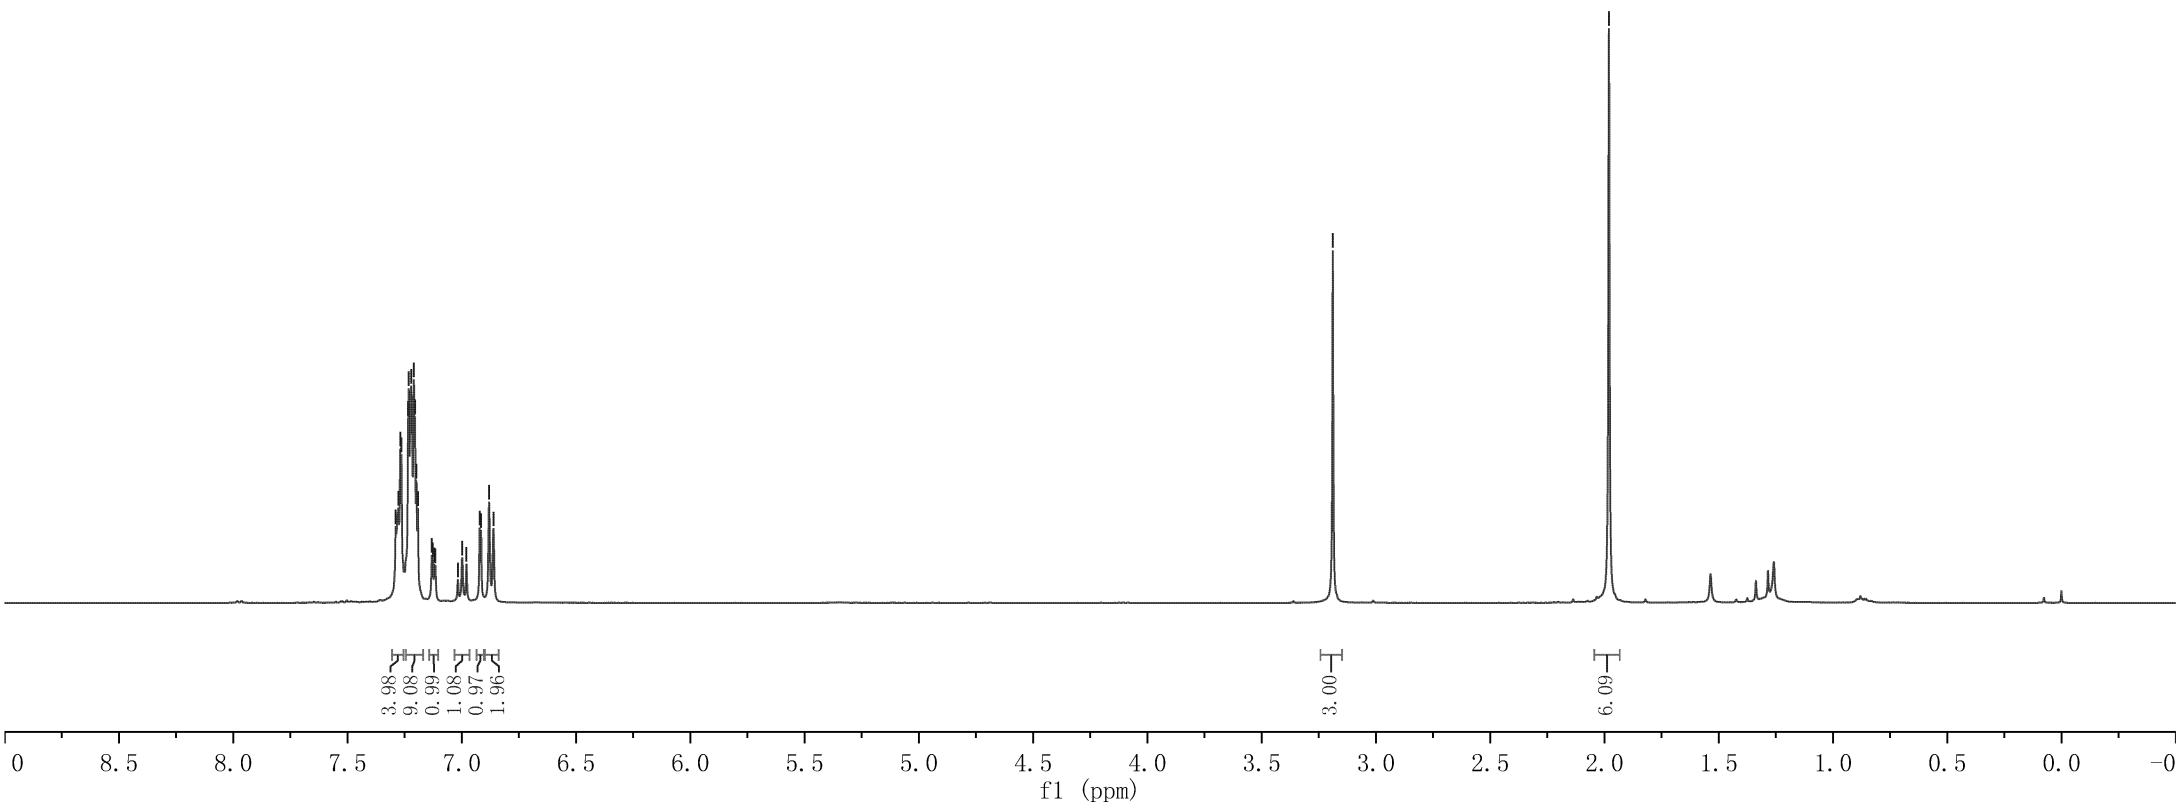

| Parameter                | Value               |
|--------------------------|---------------------|
| 1 Title                  | XHJ-2-48-C          |
| 2 Origin                 | Bruker BioSpin GmbH |
| 3 Solvent                | CDC13               |
| 4 Temperature            | 300.0               |
| 5 Number of Scans        | 40                  |
| 6 Acquisition Time       | 1.3631              |
| 7 Acquisition Date       | 2022-04-30T10:21:09 |
| 8 Spectrometer Frequency | 100.61              |
| 9 Spectral Width         | 24038.5             |

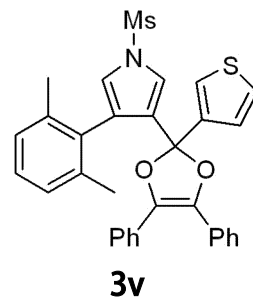

142.58  
138.15  
133.13  
129.03  
128.59  
128.03  
127.81  
127.39  
126.93  
126.62  
126.26  
126.10  
125.73  
122.95  
120.59  
119.05  
107.45

77.32  
77.00  
76.68

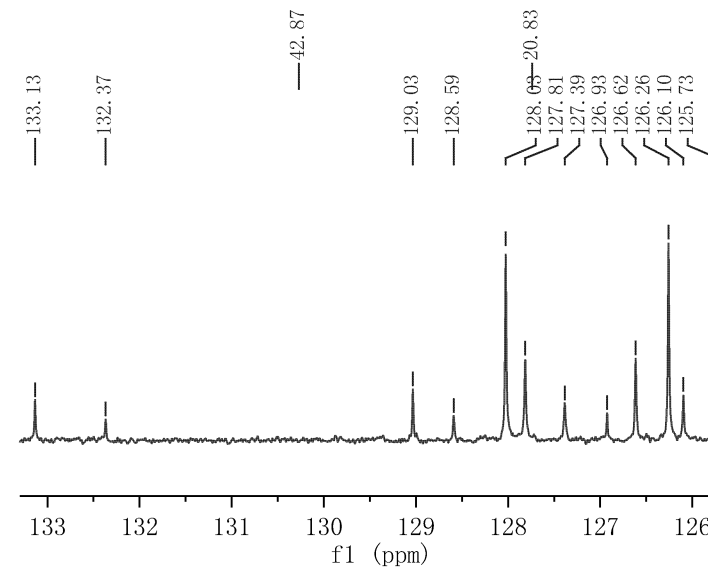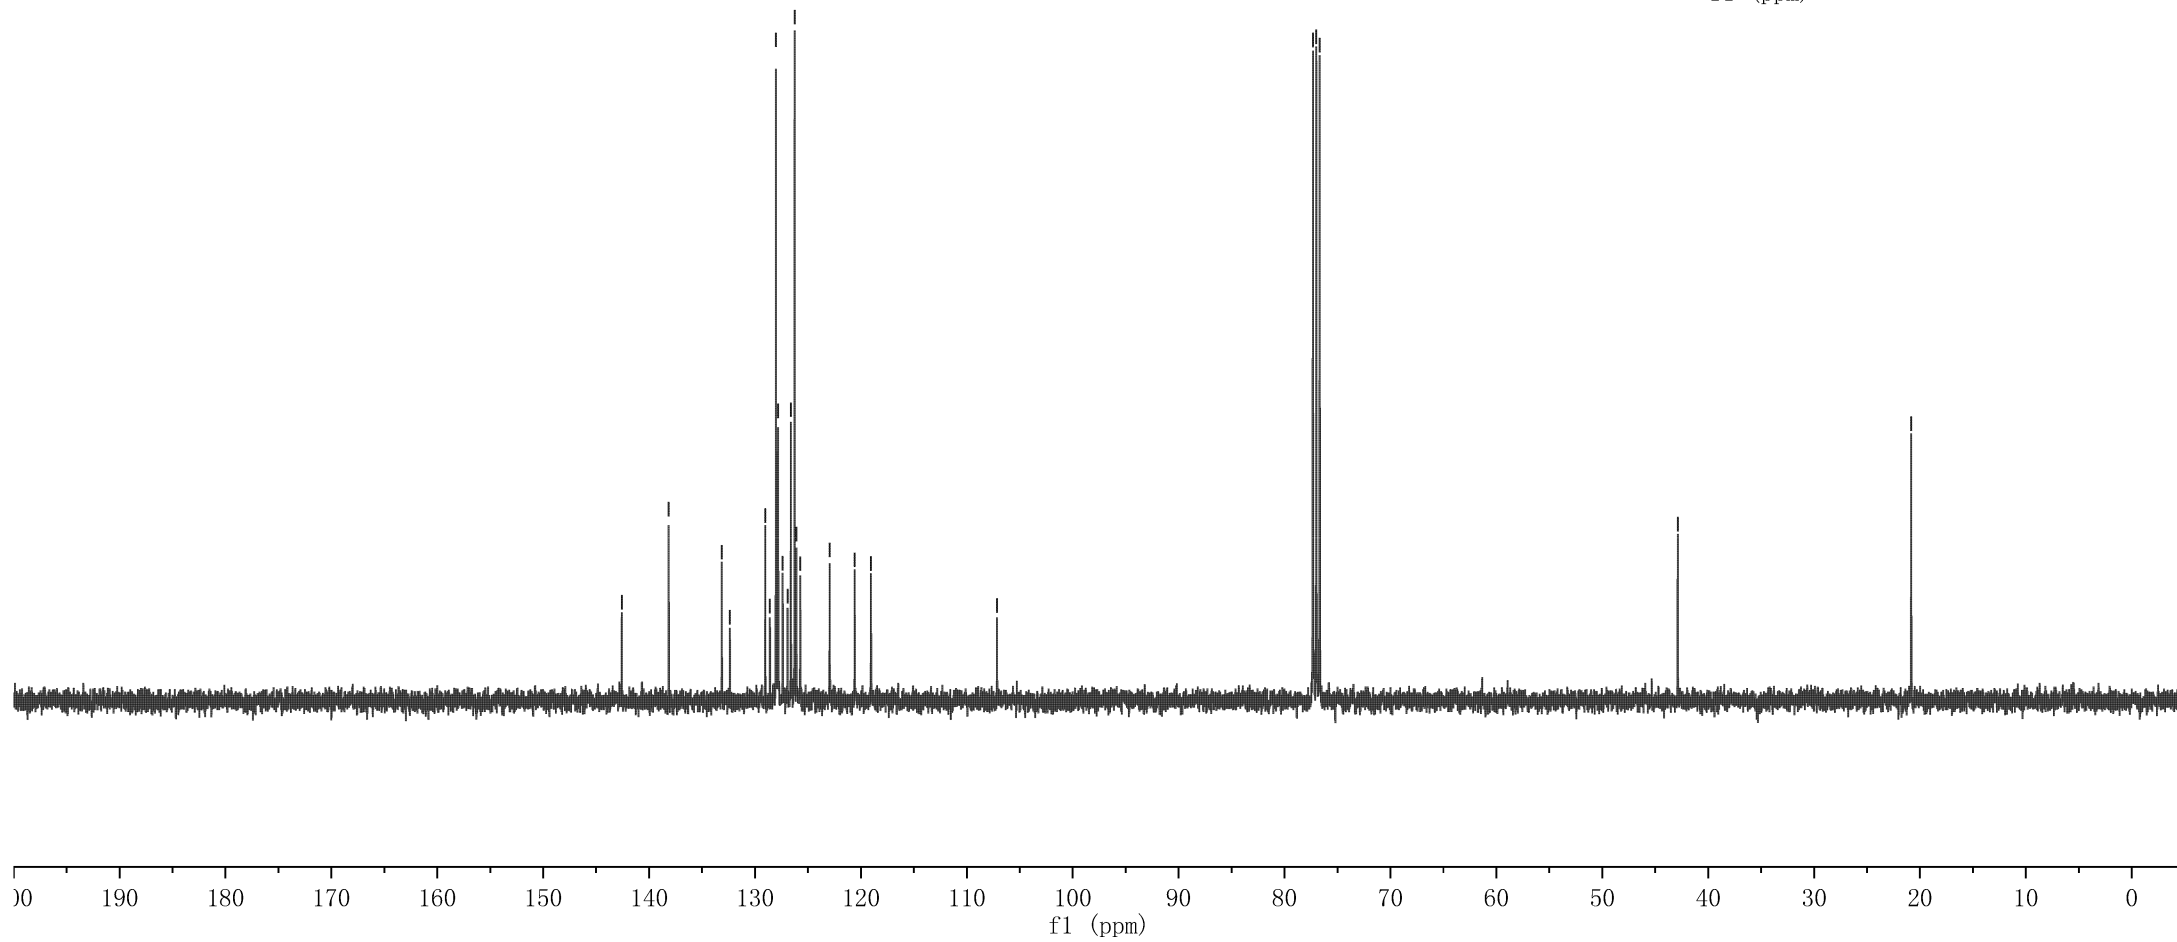

| Parameter                | Value               |
|--------------------------|---------------------|
| 1 Title                  | XHJ-2-66-H          |
| 2 Origin                 | Bruker BioSpin GmbH |
| 3 Solvent                | CDCl3               |
| 4 Temperature            | 298.0               |
| 5 Number of Scans        | 4                   |
| 6 Acquisition Time       | 4.0894              |
| 7 Acquisition Date       | 2022-05-12T14:09:59 |
| 8 Spectrometer Frequency | 400.13              |
| 9 Spectral Width         | 8012.8              |

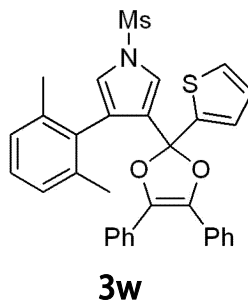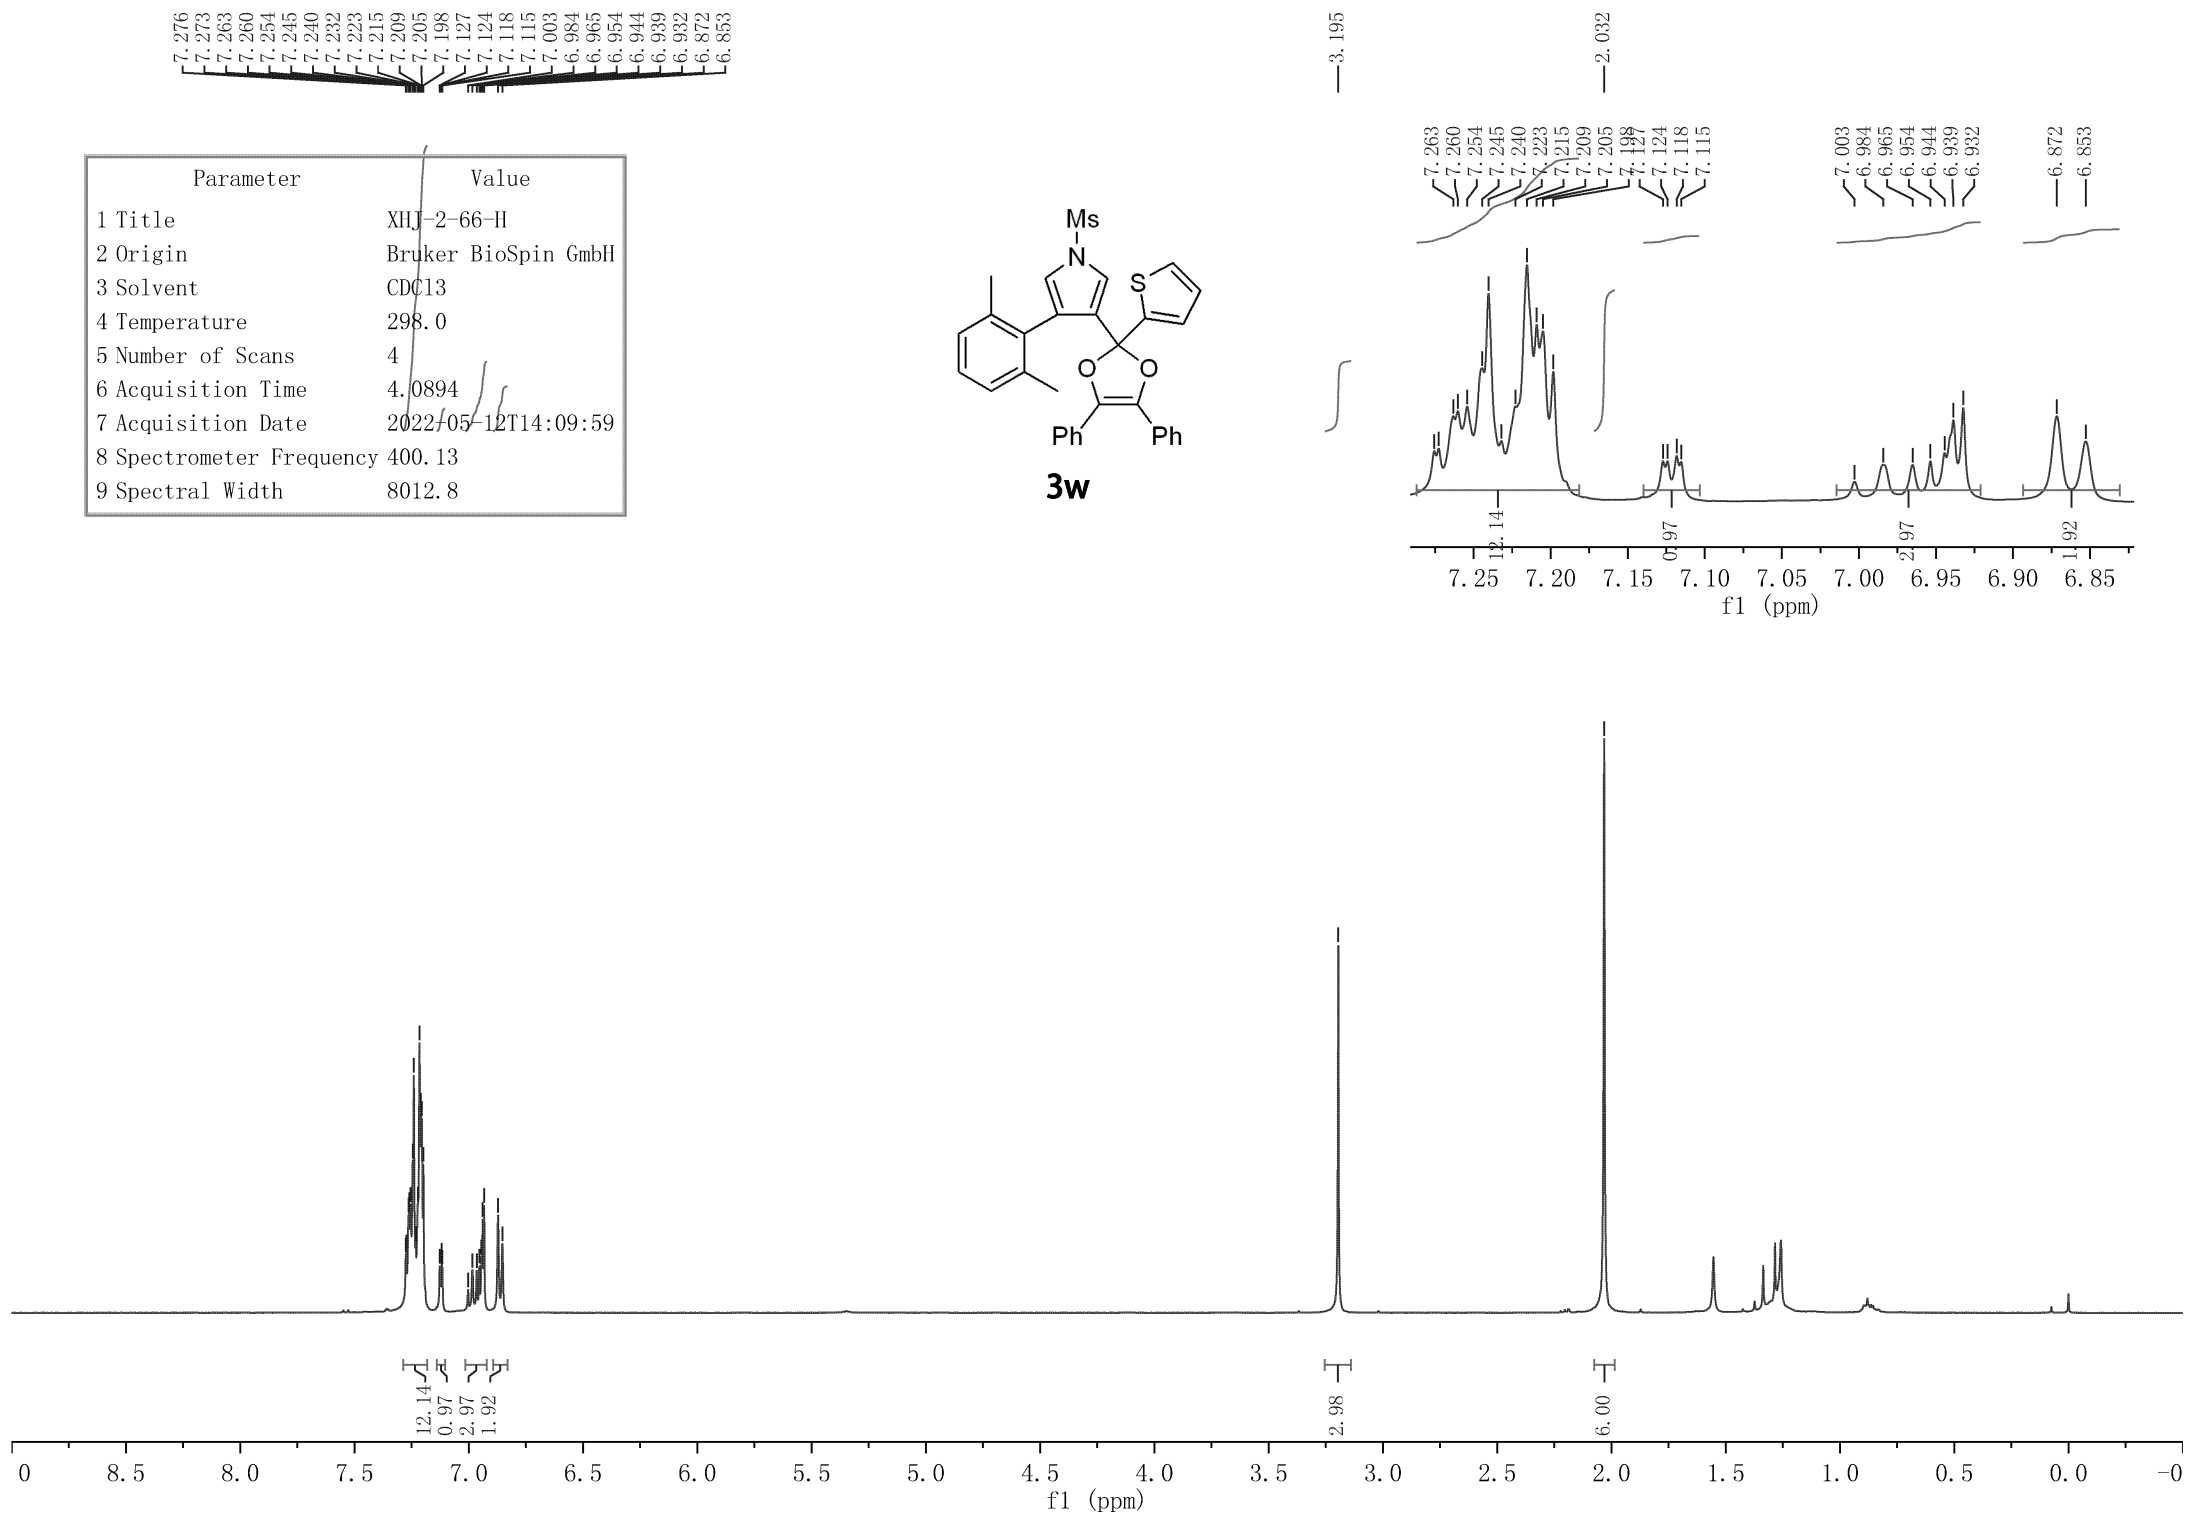

| Parameter                | Value               |
|--------------------------|---------------------|
| 1 Title                  | XIJ-2-66-C          |
| 2 Origin                 | Bruker BioSpin GmbH |
| 3 Solvent                | CDCl3               |
| 4 Temperature            | 300.0               |
| 5 Number of Scans        | 39                  |
| 6 Acquisition Time       | 1.3631              |
| 7 Acquisition Date       | 2022-05-12T14:10:55 |
| 8 Spectrometer Frequency | 100.61              |
| 9 Spectral Width         | 24038.5             |

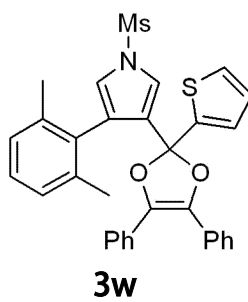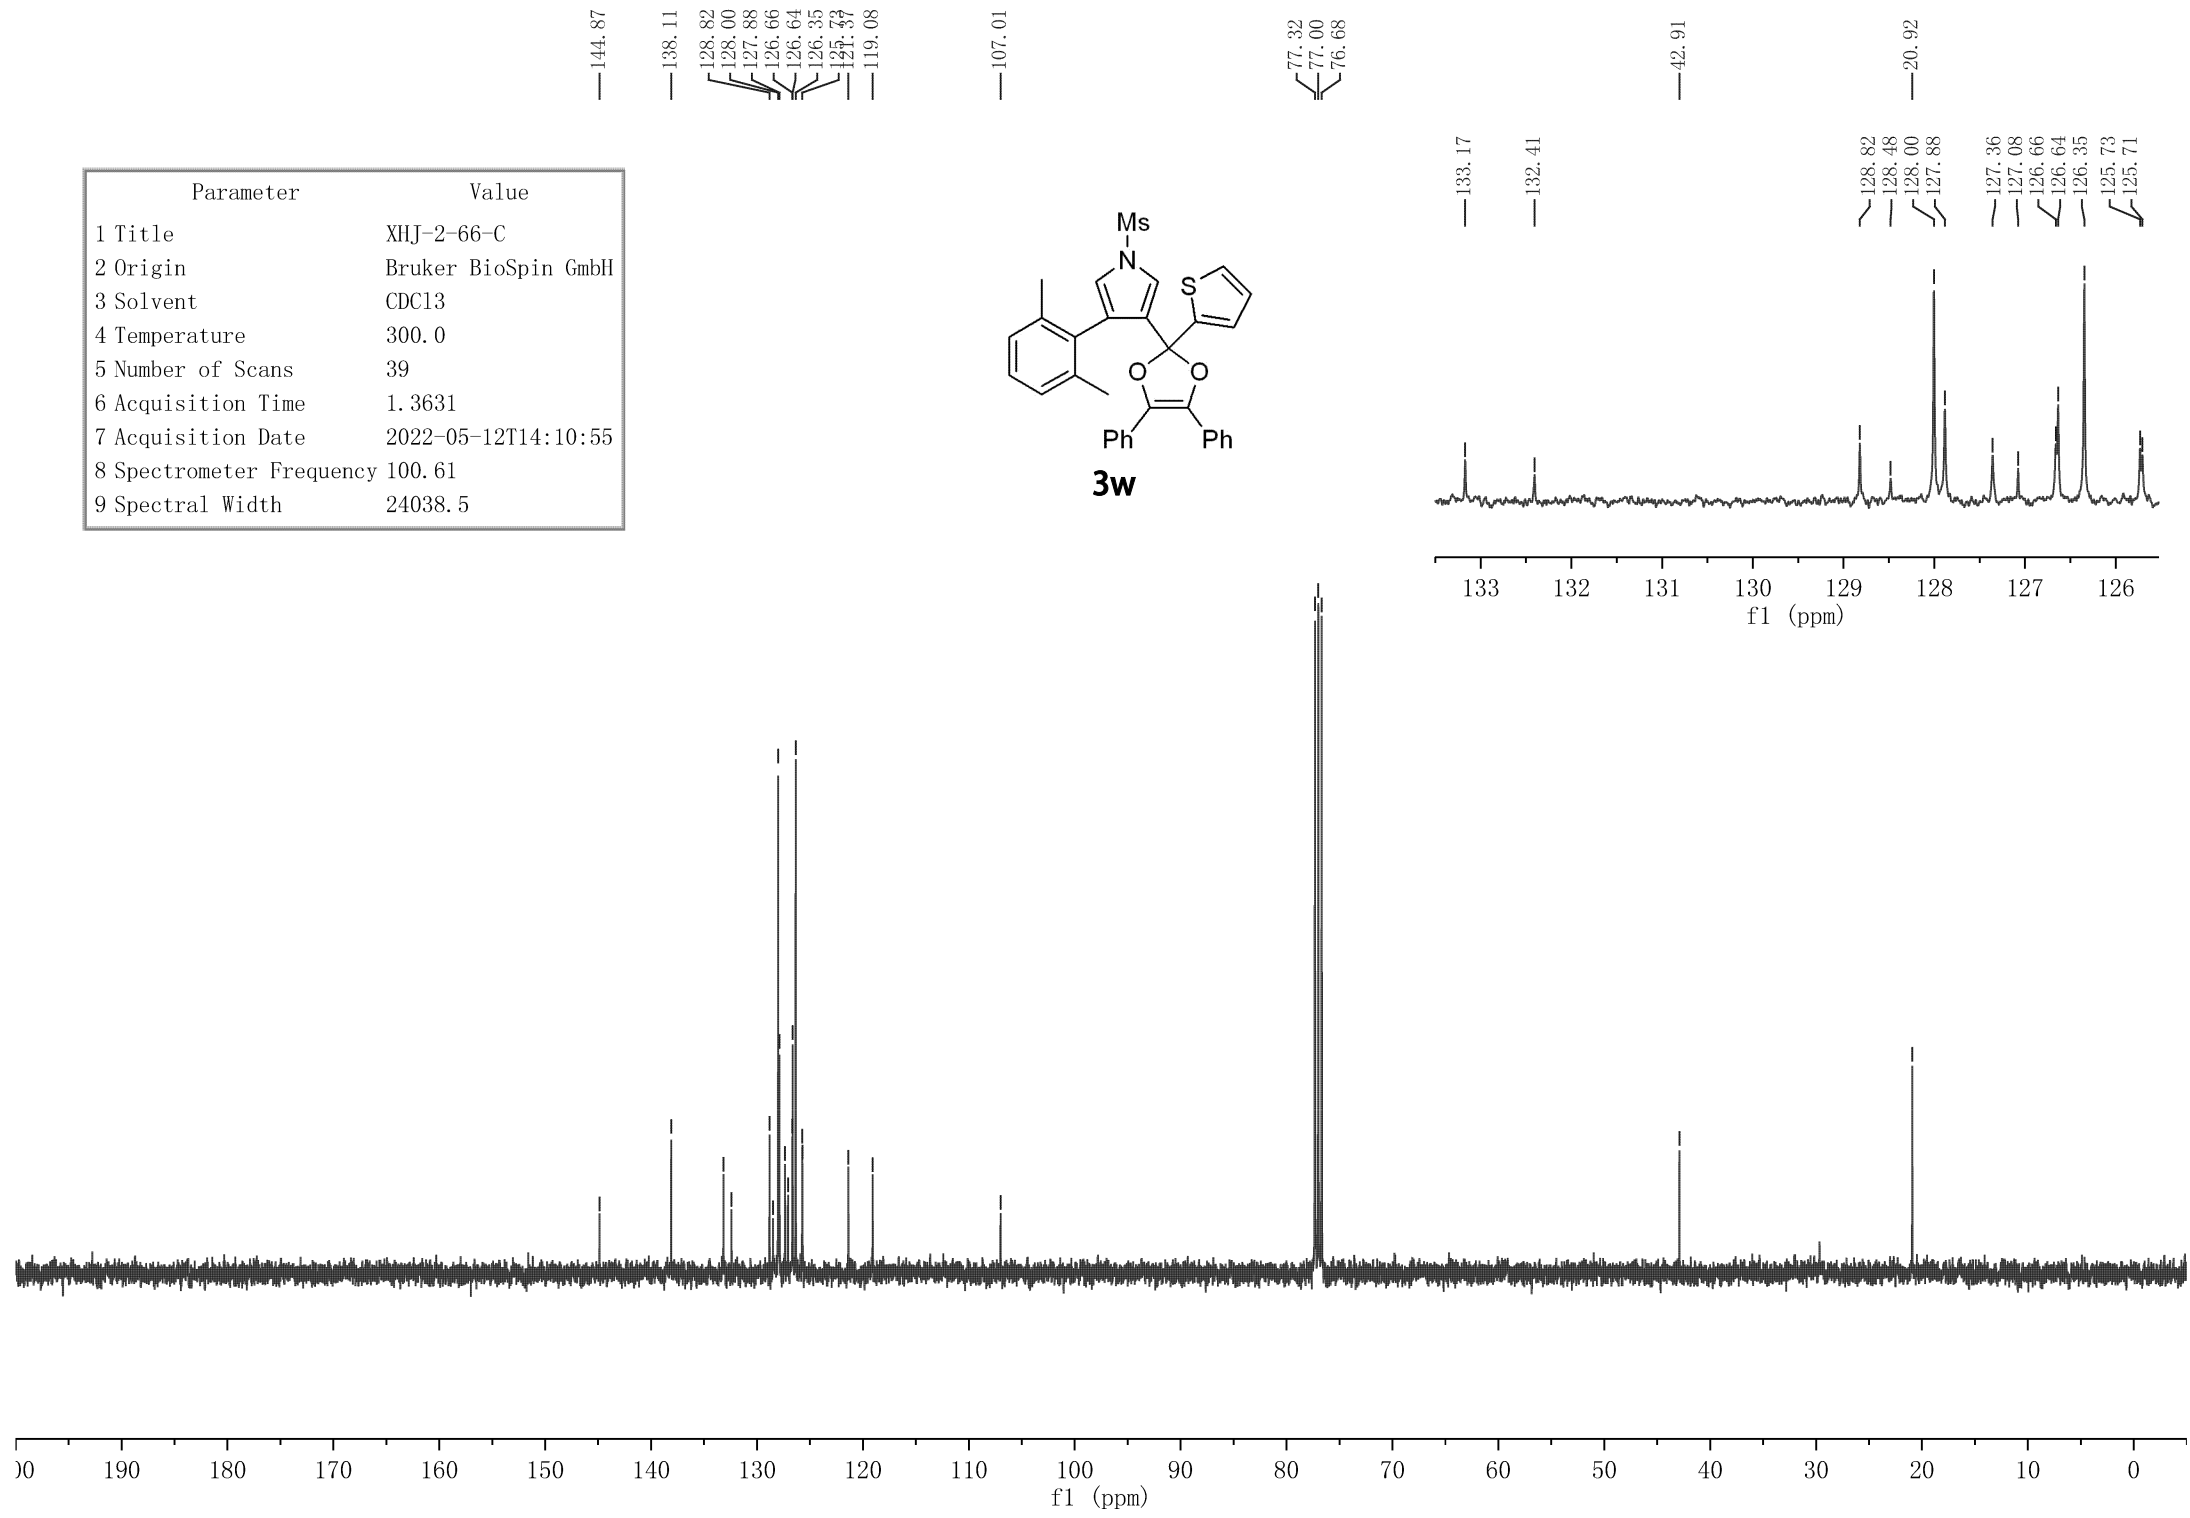

7.481  
7.478  
7.462  
7.458  
7.383  
7.378  
7.362  
7.359  
7.288  
7.283  
7.264  
7.248  
7.235  
7.229  
7.212  
7.202  
7.199  
7.189  
7.187  
7.076  
7.070  
7.055  
7.053  
7.046  
7.043  
7.025  
7.006  
6.987  
6.928  
6.919  
6.916  
6.907  
6.900  
6.883  
6.863  
6.844

| Parameter                | Value               |
|--------------------------|---------------------|
| 1 Title                  | XIJ-2-105-H         |
| 2 Origin                 | Bruker BioSpin GmbH |
| 3 Solvent                | CDCl <sub>3</sub>   |
| 4 Temperature            | 298.0               |
| 5 Number of Scans        | 9                   |
| 6 Acquisition Time       | 4.0894              |
| 7 Acquisition Date       | 2022-06-13T15:32:10 |
| 8 Spectrometer Frequency | 400.13              |
| 9 Spectral Width         | 8012.8              |

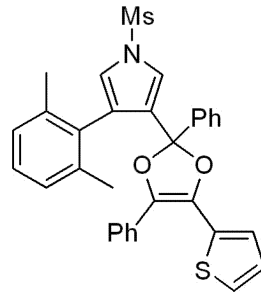

**3x**

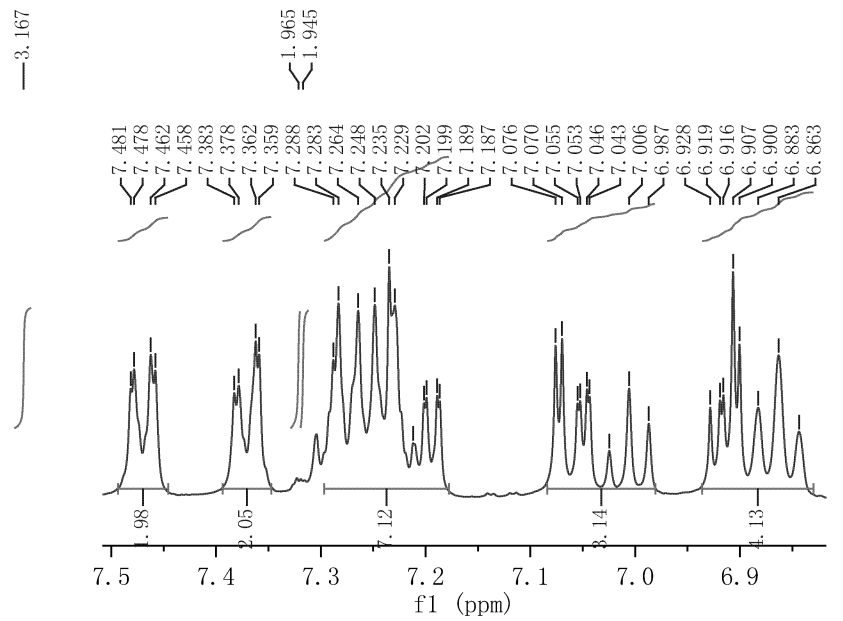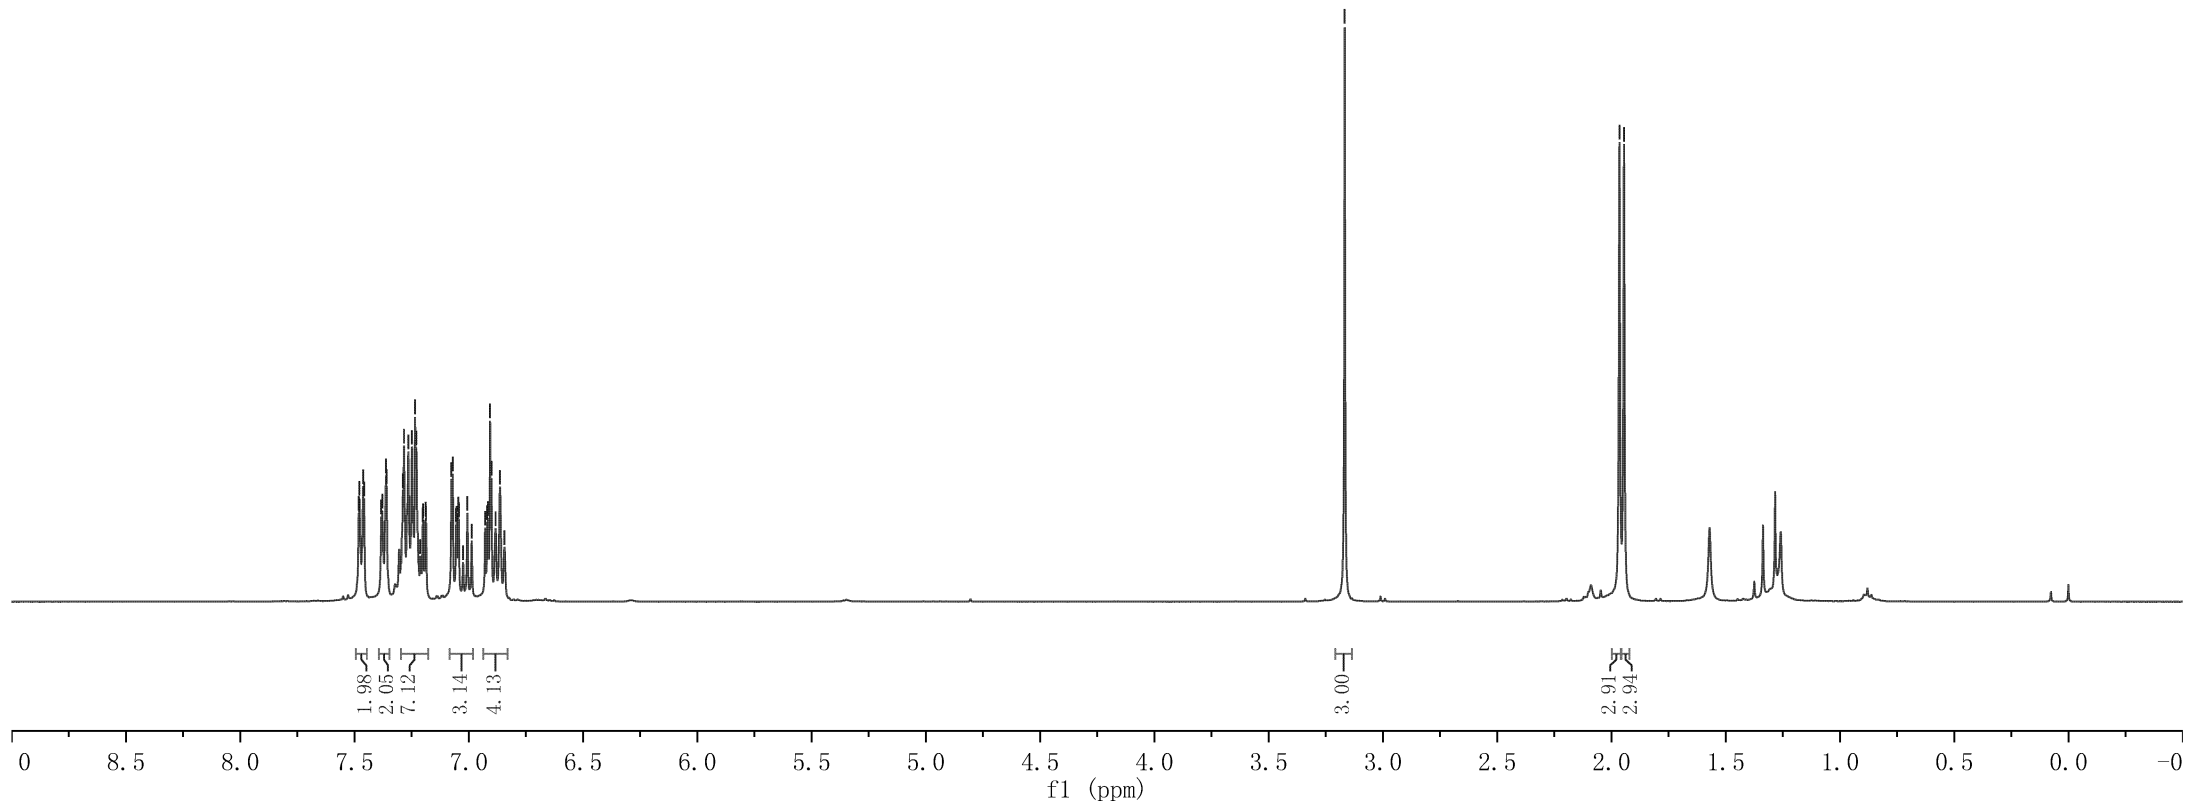

| Parameter                | Value               |
|--------------------------|---------------------|
| 1 Title                  | XIJ-2-105-C         |
| 2 Origin                 | Bruker BioSpin GmbH |
| 3 Solvent                | CDC13               |
| 4 Temperature            | 300.0               |
| 5 Number of Scans        | 31                  |
| 6 Acquisition Time       | 1.3631              |
| 7 Acquisition Date       | 2022-06-13T15:34:00 |
| 8 Spectrometer Frequency | 100.61              |
| 9 Spectral Width         | 24038.5             |

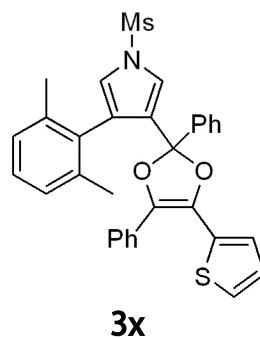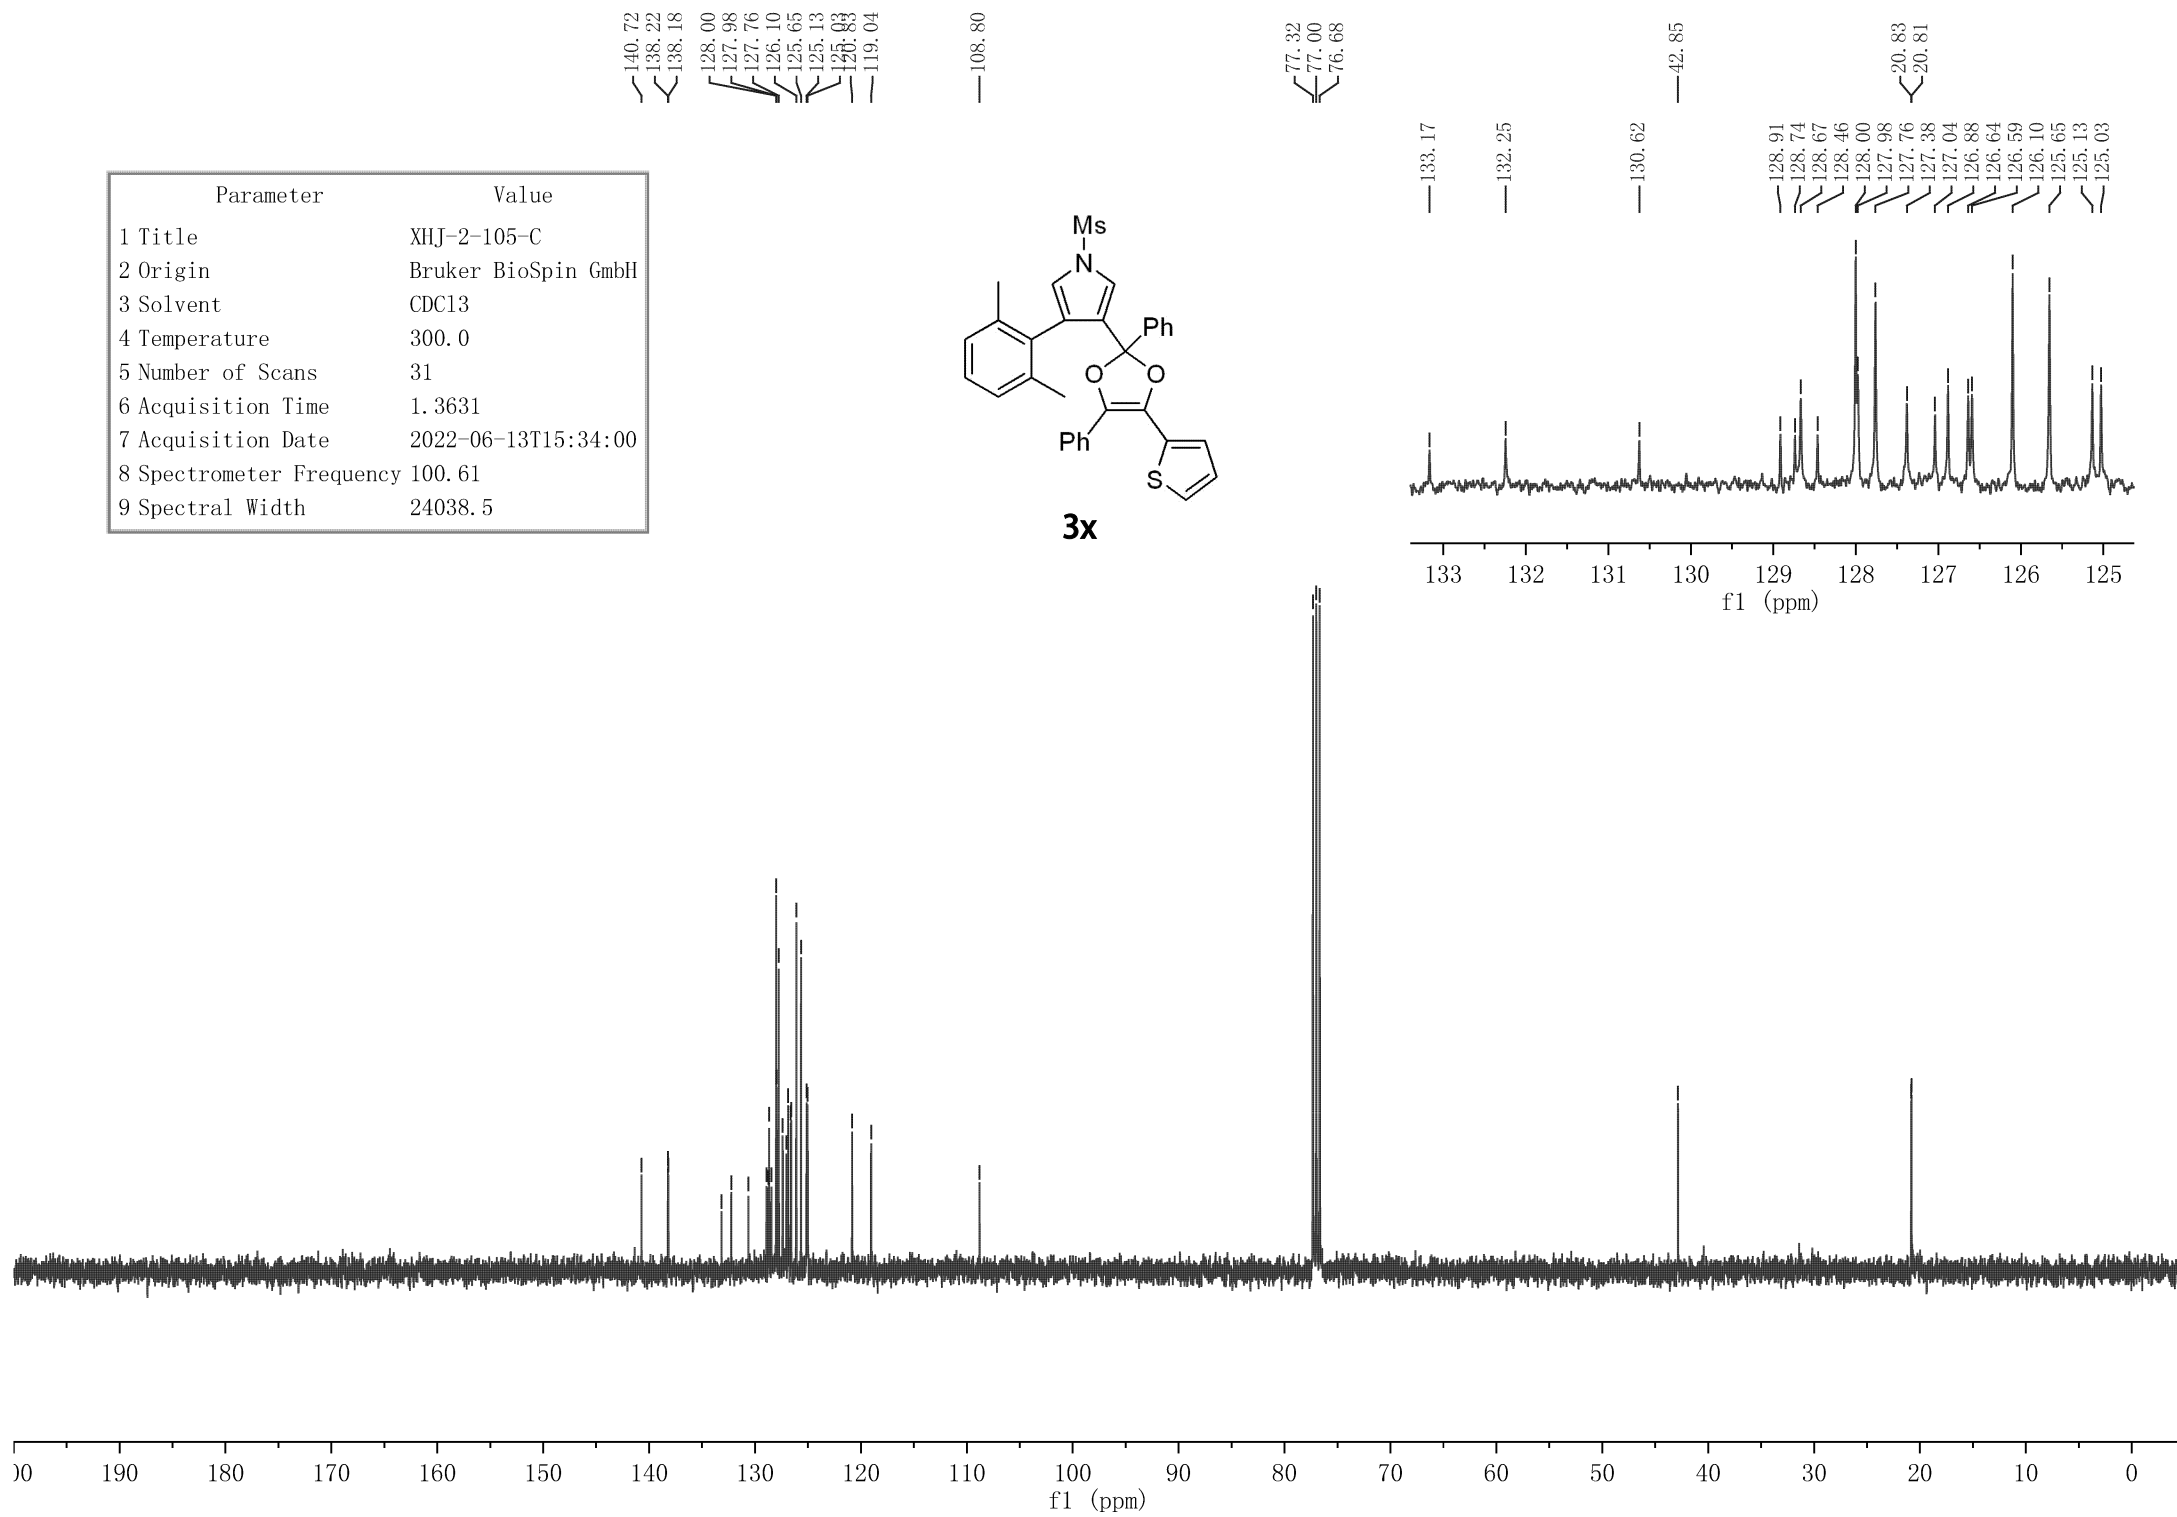

7.446  
7.428  
7.425  
7.374  
7.356  
7.338  
7.310  
7.294  
7.274  
7.257  
7.237  
7.234  
7.153  
7.147  
7.137  
7.116  
7.096  
7.076  
7.089  
7.057  
7.042  
7.038  
7.021  
7.005  
6.986  
6.909  
6.902  
6.880  
6.866  
6.848

| Parameter                | Value               |
|--------------------------|---------------------|
| 1 Title                  | XHJ-2019-2-H        |
| 2 Origin                 | Bruker BioSpin GmbH |
| 3 Solvent                | CDCl3               |
| 4 Temperature            | 298.0               |
| 5 Number of Scans        | 10                  |
| 6 Acquisition Time       | 4.0894              |
| 7 Acquisition Date       | 2022-06-03T15:34:37 |
| 8 Spectrometer Frequency | 400.13              |
| 9 Spectral Width         | 8012.8              |

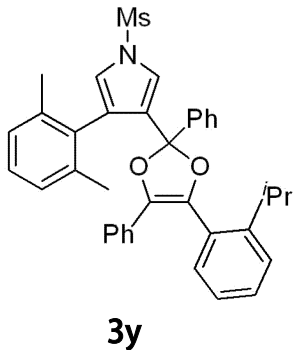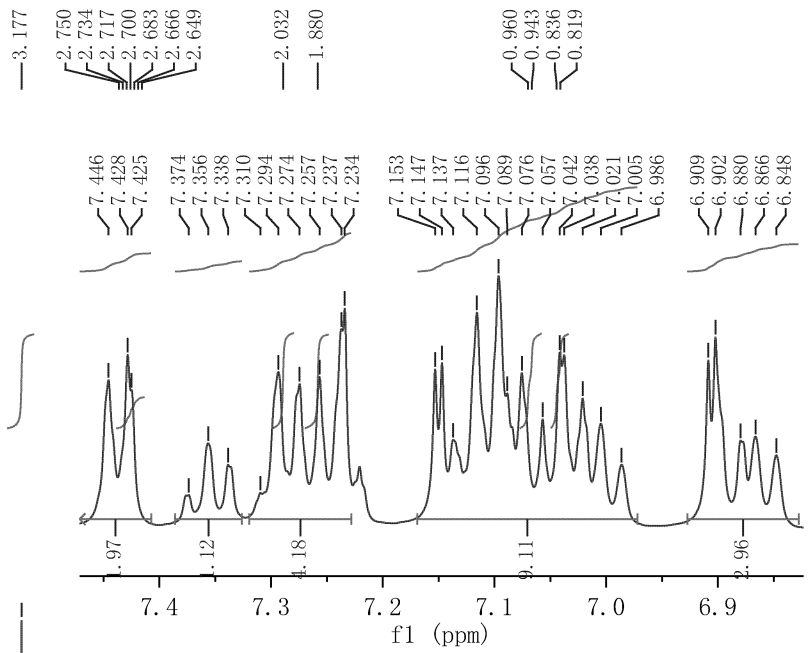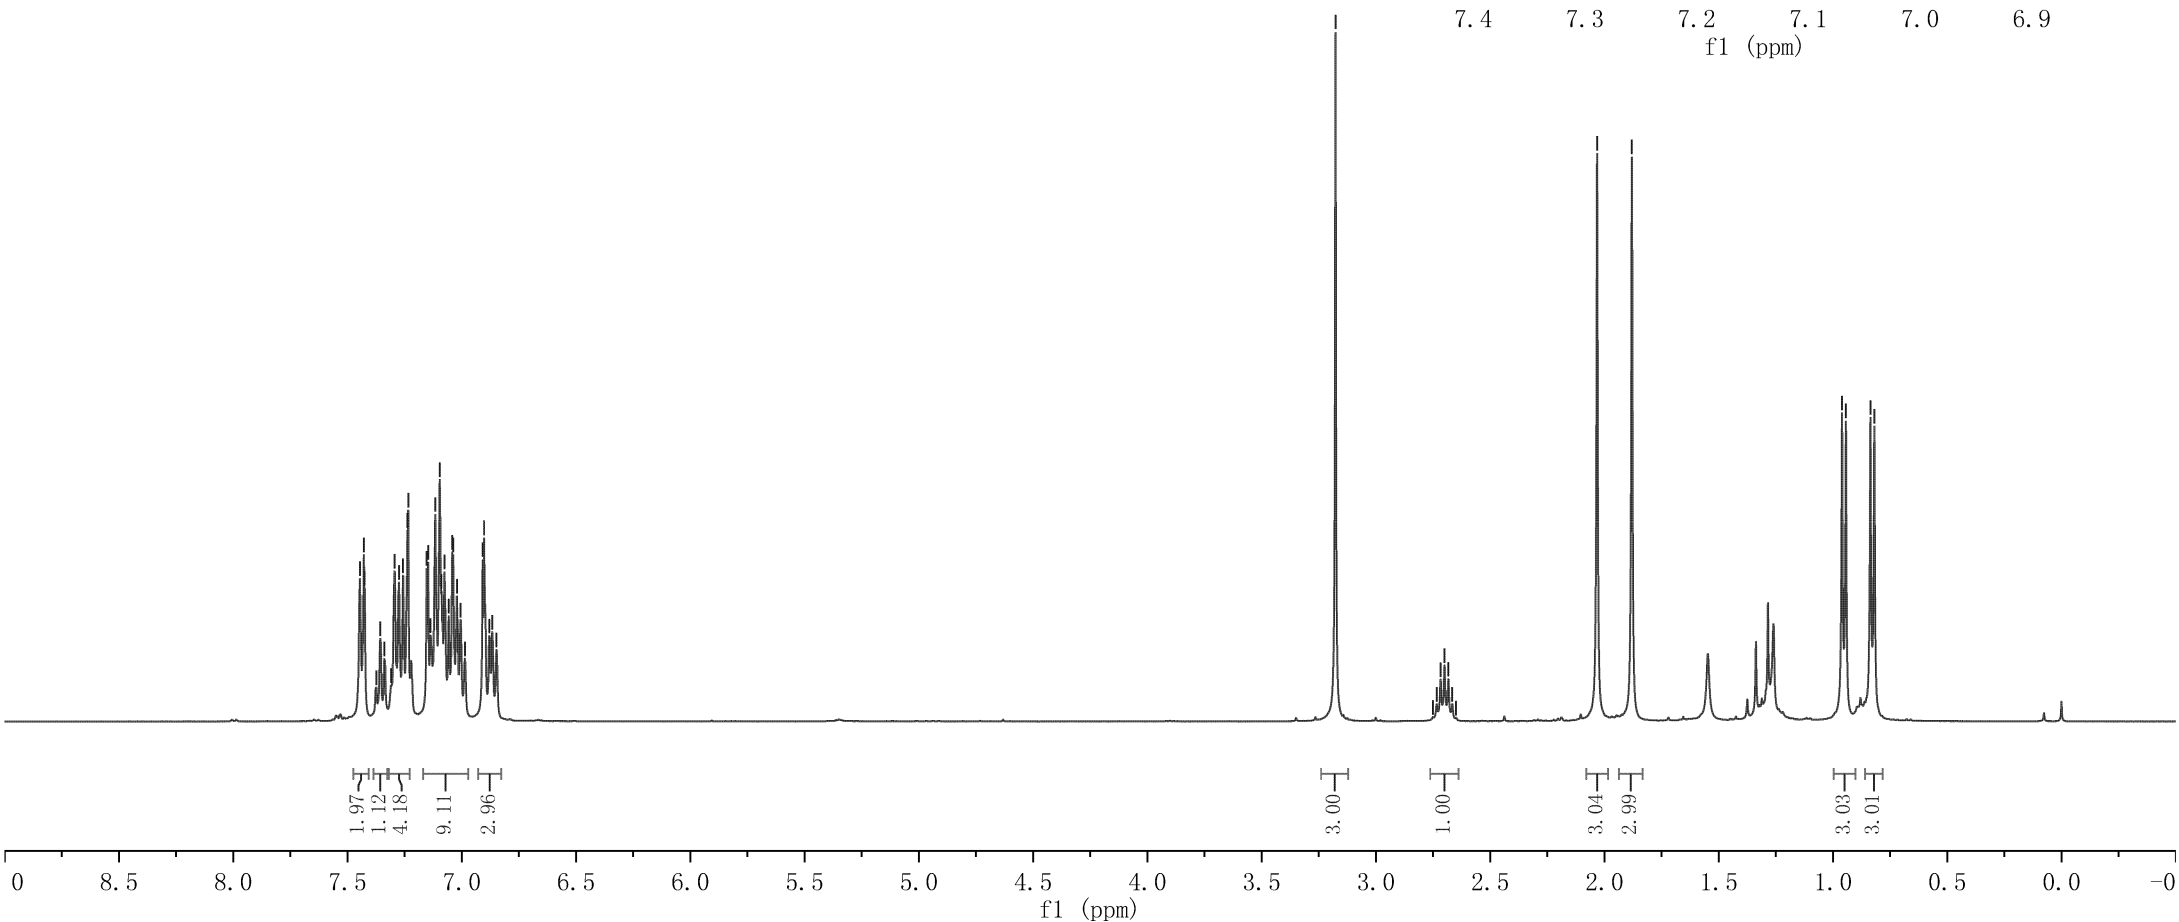



| Parameter                | Value               |
|--------------------------|---------------------|
| 1 Title                  | XHJ-2-91-2-C        |
| 2 Origin                 | Bruker BioSpin GmbH |
| 3 Solvent                | CDC13               |
| 4 Temperature            | 300.0               |
| 5 Number of Scans        | 47                  |
| 6 Acquisition Time       | 1.3631              |
| 7 Acquisition Date       | 2022-06-03T15:36:16 |
| 8 Spectrometer Frequency | 100.61              |
| 9 Spectral Width         | 24038.5             |

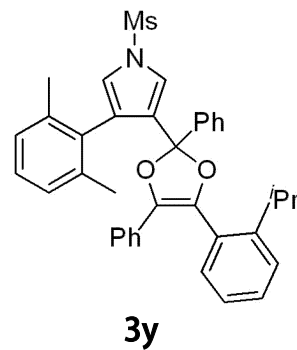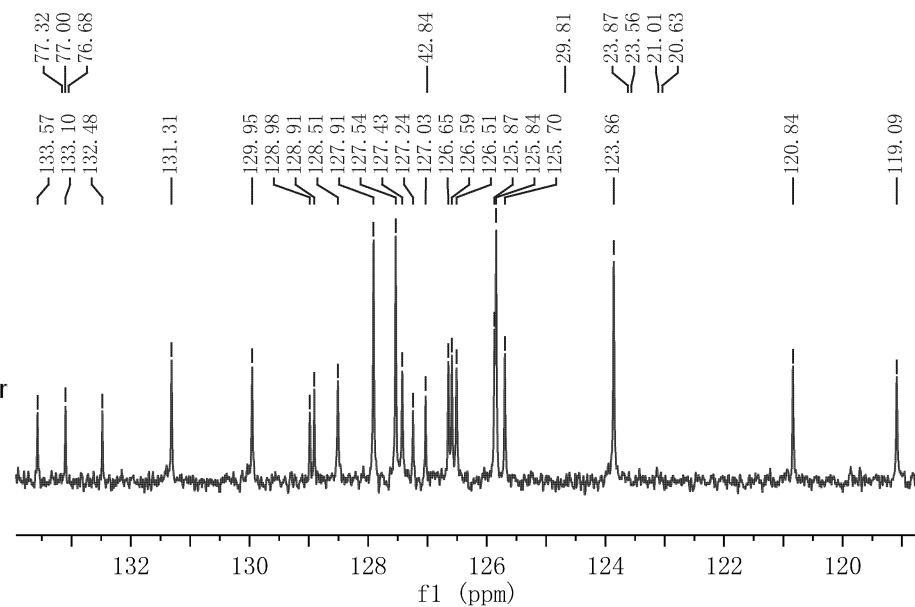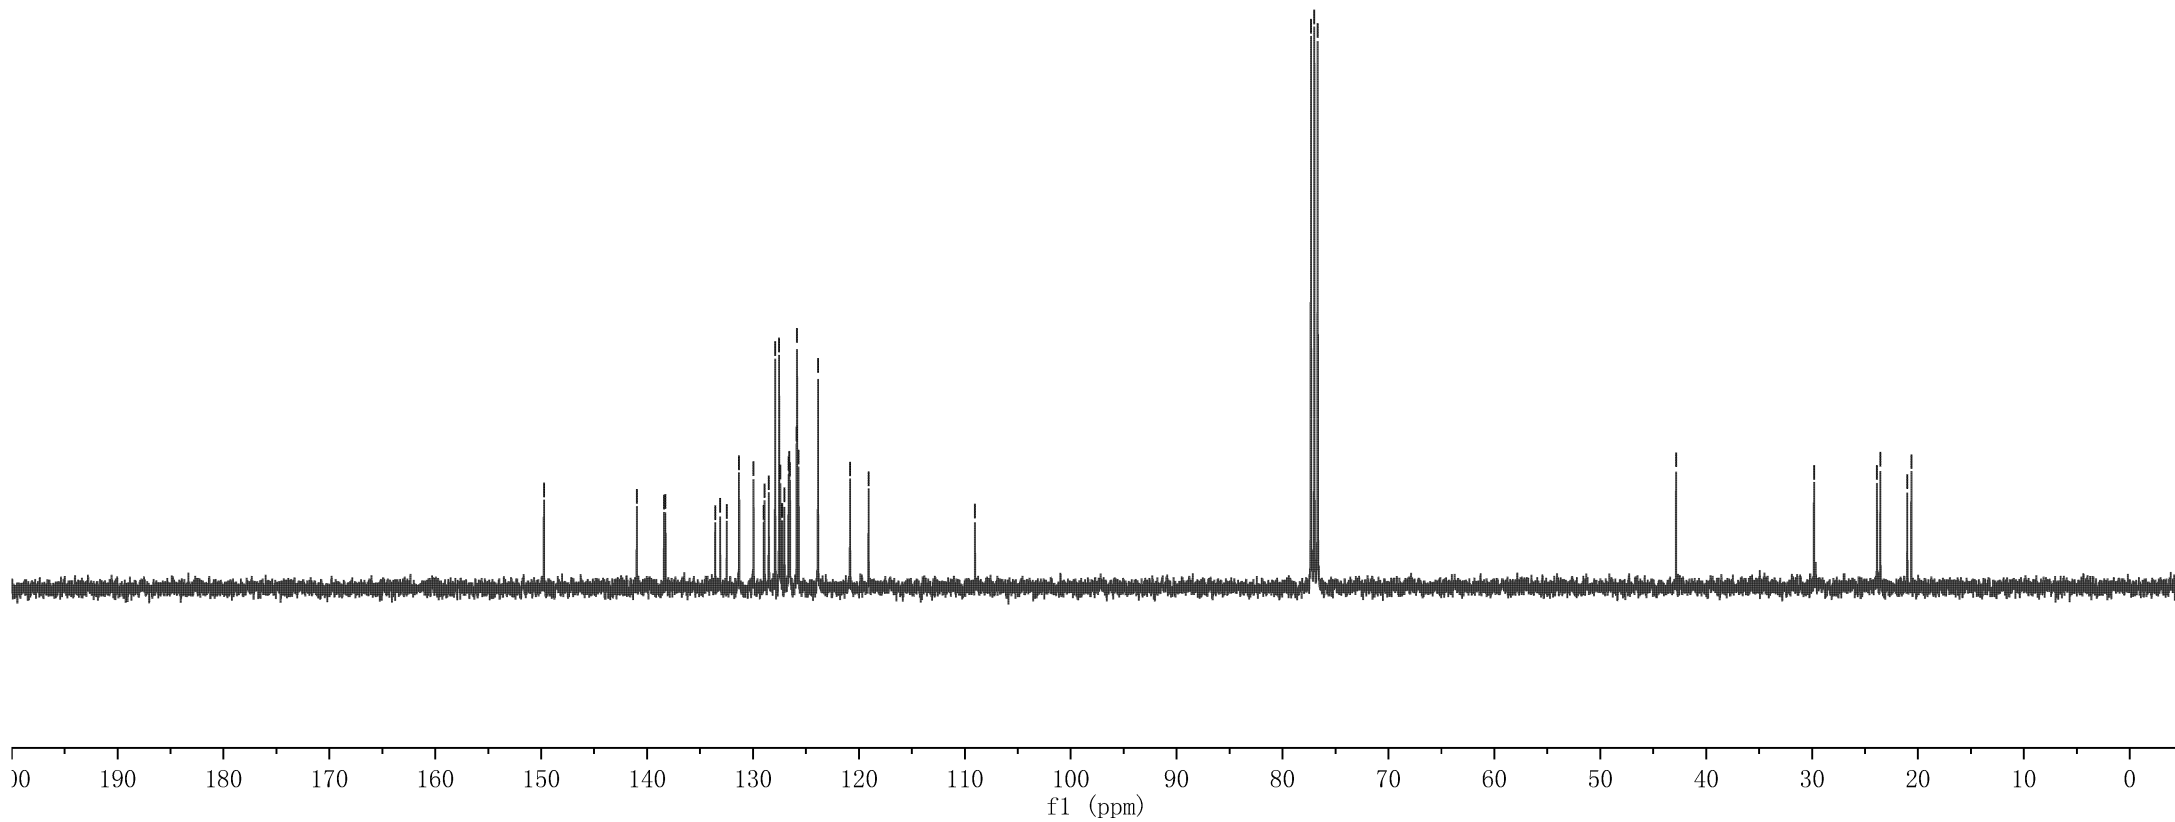

7.692  
7.672  
7.651  
7.631  
7.350  
7.332  
7.279  
7.260  
7.164  
7.100  
7.082  
7.047  
7.028  
7.000  
6.983  
6.966  
6.916  
6.844  
6.830  
6.757  
6.737

3.791

2.733  
2.717  
2.701

1.896  
1.745

0.963  
0.947  
0.859  
0.842

| Parameter                | Value               |
|--------------------------|---------------------|
| 1 Title                  | XHJ-2-134-H         |
| 2 Origin                 | Bruker/BioSpin GmbH |
| 3 Solvent                | CDC13               |
| 4 Temperature            | 298.0               |
| 5 Number of Scans        | 15                  |
| 6 Acquisition Time       | 4.0894              |
| 7 Acquisition Date       | 2022-06-28T10:54:01 |
| 8 Spectrometer Frequency | 400.13              |
| 9 Spectral Width         | 8012.8              |

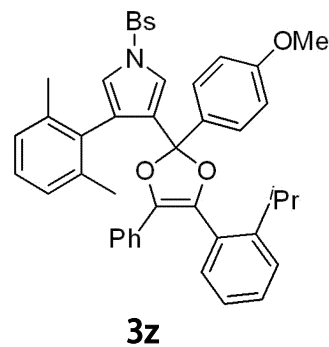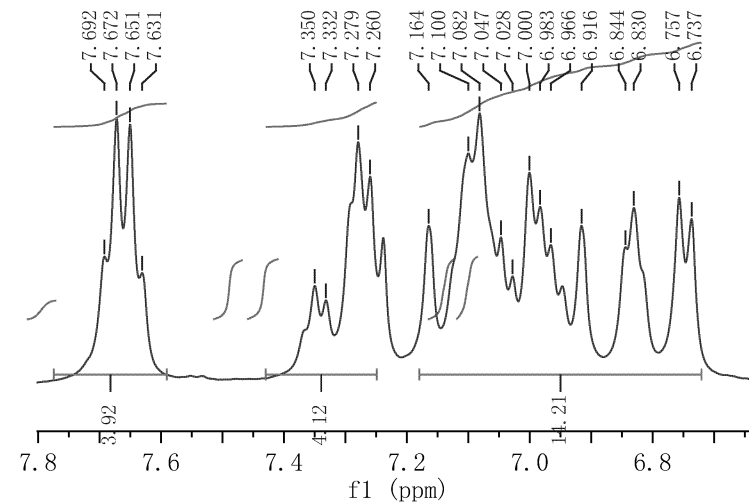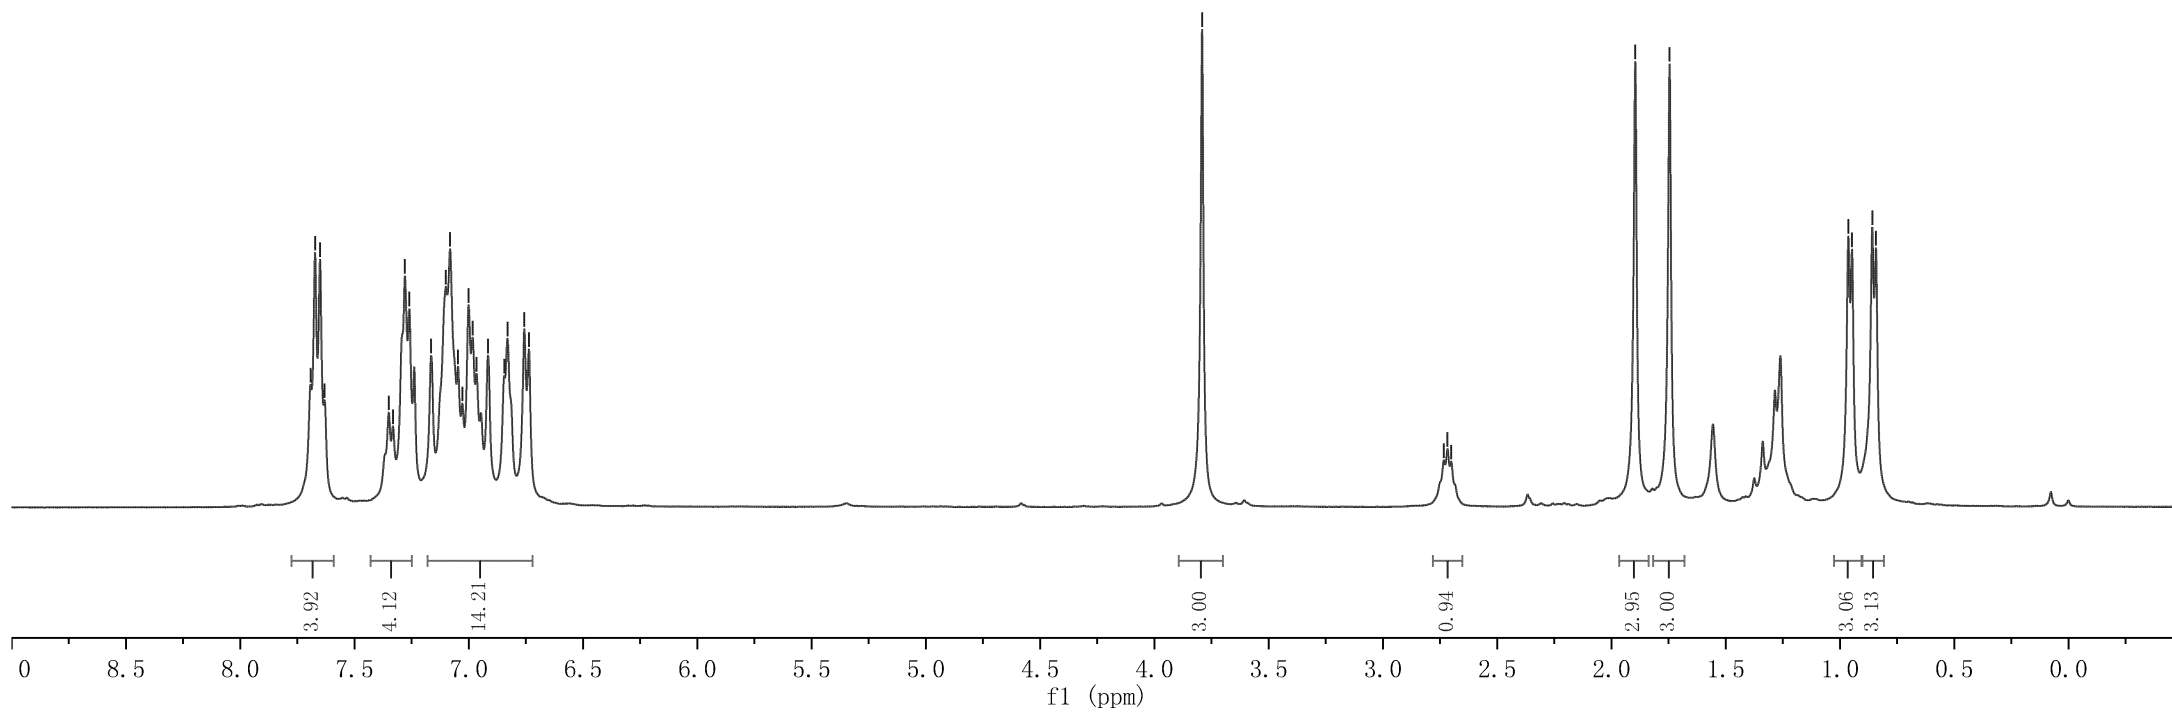

| Parameter                | Value               |
|--------------------------|---------------------|
| 1 Title                  | XHJ-2-125-C-2       |
| 2 Origin                 | Bruker BioSpin GmbH |
| 3 Solvent                | CDC13               |
| 4 Temperature            | 300.0               |
| 5 Number of Scans        | 192                 |
| 6 Acquisition Time       | 1.3631              |
| 7 Acquisition Date       | 2022-06-23T15:35:08 |
| 8 Spectrometer Frequency | 100.61              |
| 9 Spectral Width         | 24038.5             |

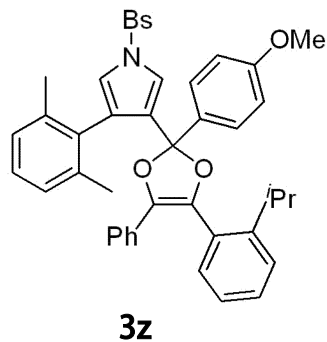

159.76  
149.69  
138.29  
138.12  
137.96  
132.70  
131.30  
128.11  
127.90  
127.43  
127.14  
126.60  
126.55  
125.89  
125.70  
123.80  
109.02

77.32  
77.00  
76.68

133.51  
133.06  
133.01  
132.70  
132.35  
131.30

55.33

130.16  
129.94  
129.20  
128.93  
128.11  
127.90  
127.75  
127.32  
127.14  
126.60  
126.55  
126.48  
125.89  
125.70

29.85

23.87  
23.62  
20.88  
20.50

123.83

121.16

119.75

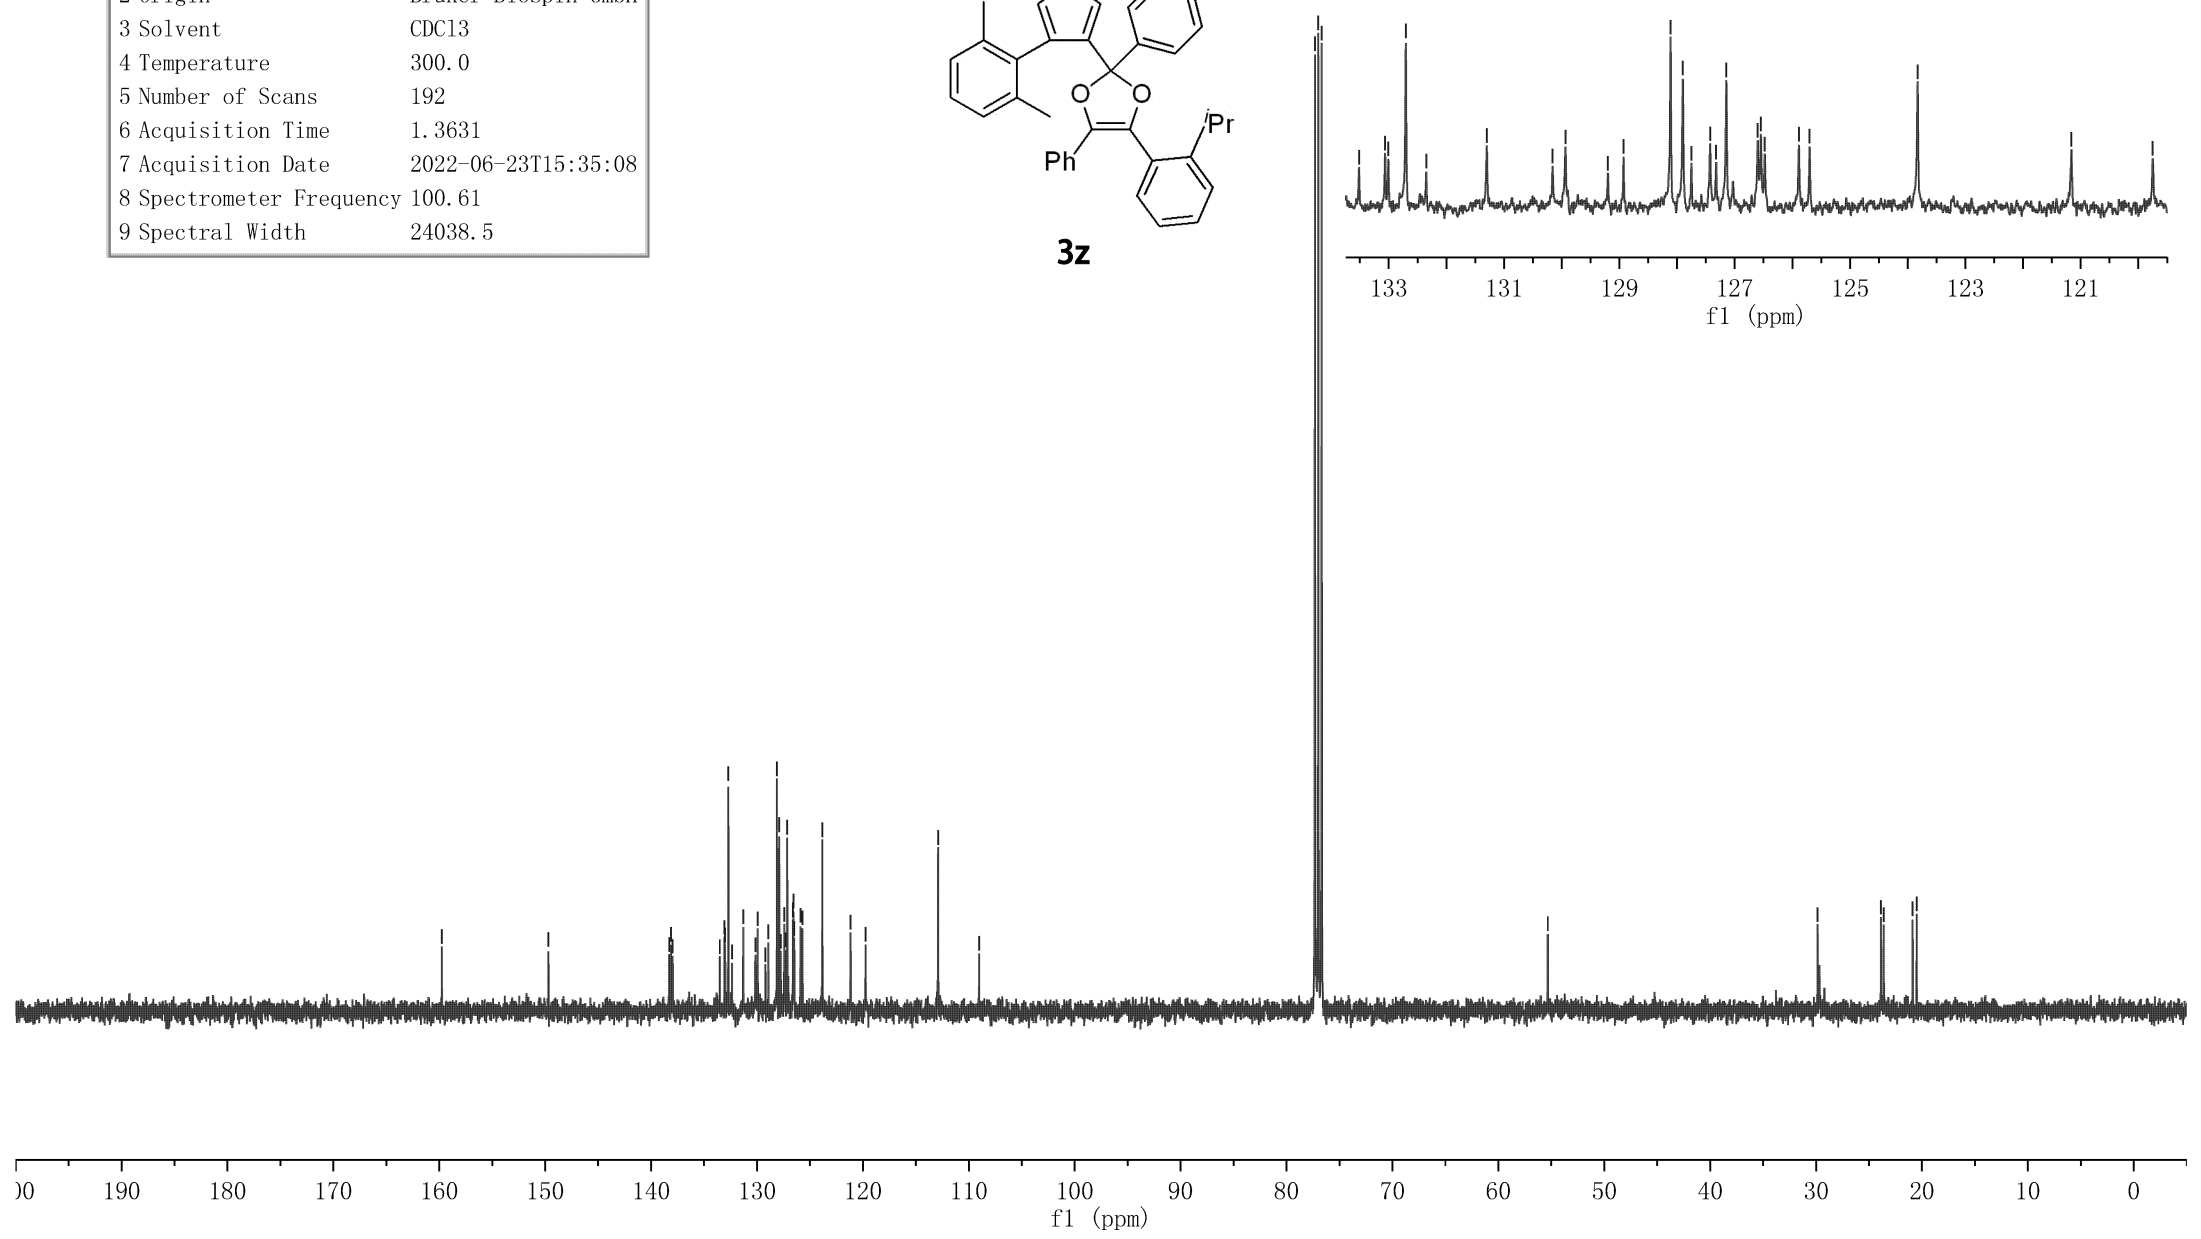



| Parameter                | Value               |
|--------------------------|---------------------|
| 1 Title                  | XHJ-2-132-C         |
| 2 Origin                 | Bruker BioSpin GmbH |
| 3 Solvent                | CDC13               |
| 4 Temperature            | 300.0               |
| 5 Number of Scans        | 100                 |
| 6 Acquisition Time       | 1.3631              |
| 7 Acquisition Date       | 2022-06-27T15:40:30 |
| 8 Spectrometer Frequency | 100.61              |
| 9 Spectral Width         | 24038.5             |

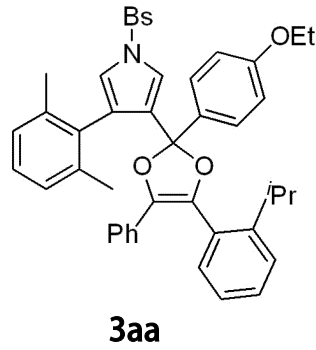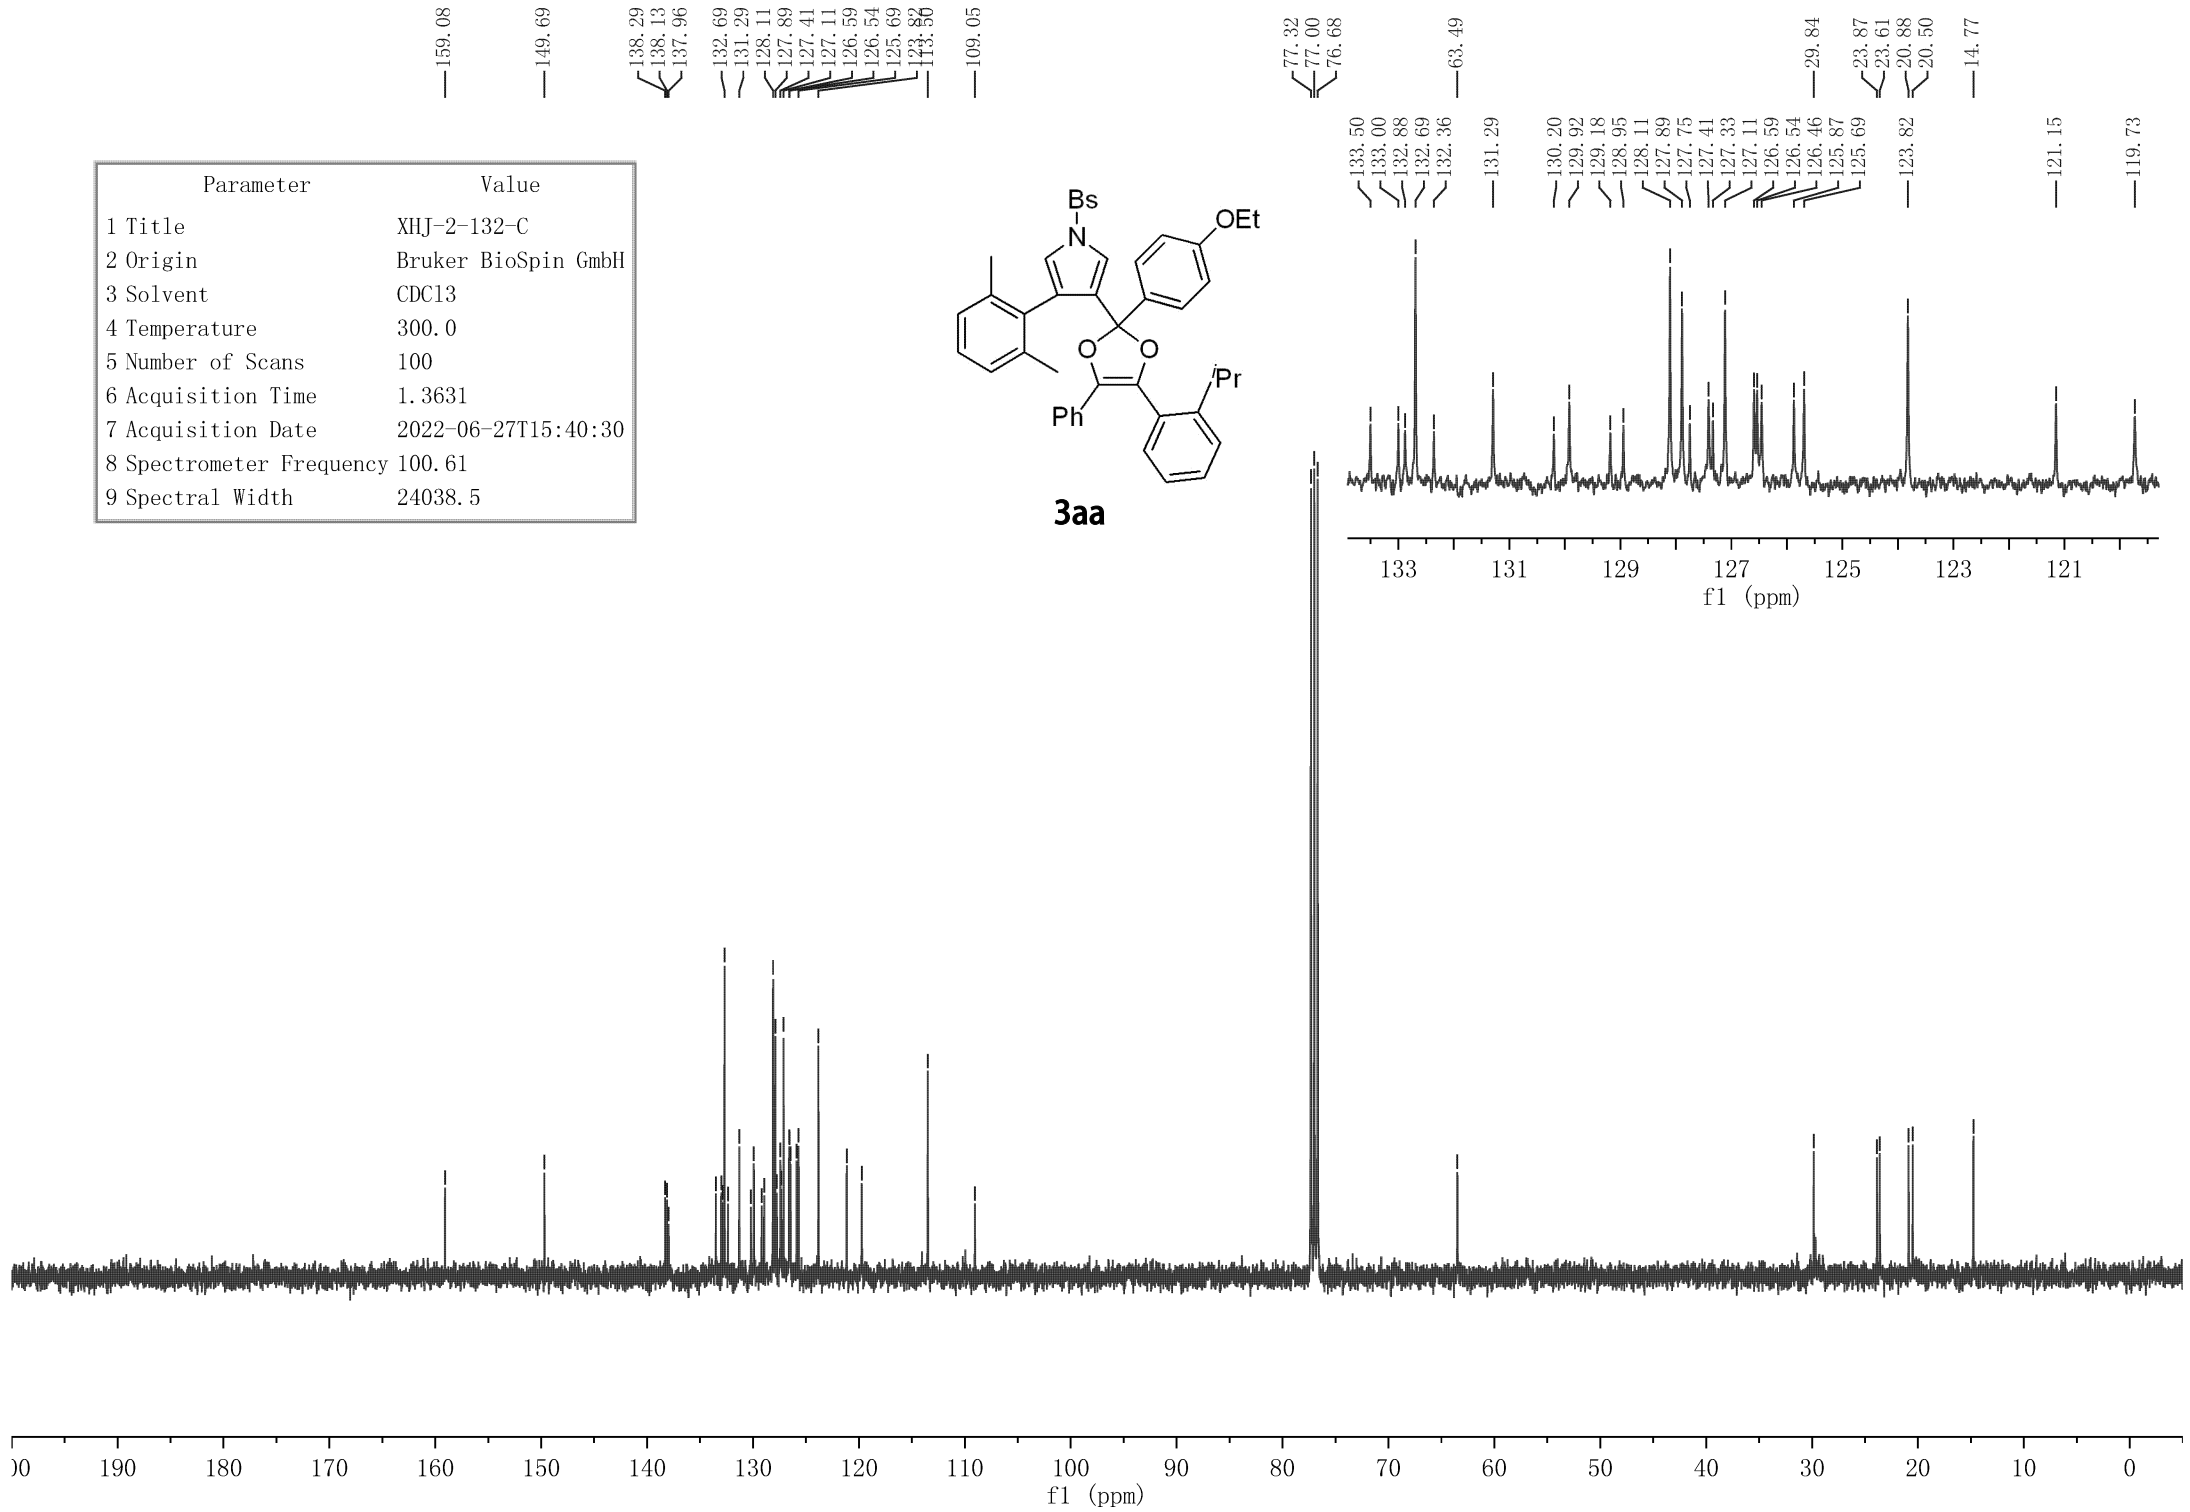

| Parameter                | Value               |
|--------------------------|---------------------|
| 1 Title                  | XHJ-2-220-II-2      |
| 2 Origin                 | Bruker BioSpin GmbH |
| 3 Solvent                | CDC13               |
| 4 Temperature            | 298.0               |
| 5 Number of Scans        | 11                  |
| 6 Acquisition Time       | 4.0894              |
| 7 Acquisition Date       | 2022-08-16T15:49:06 |
| 8 Spectrometer Frequency | 400.13              |
| 9 Spectral Width         | 8012.8              |

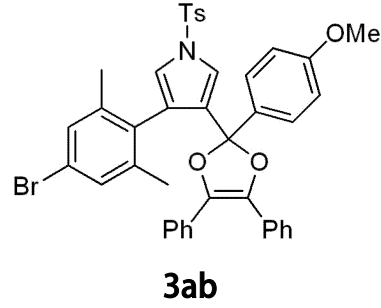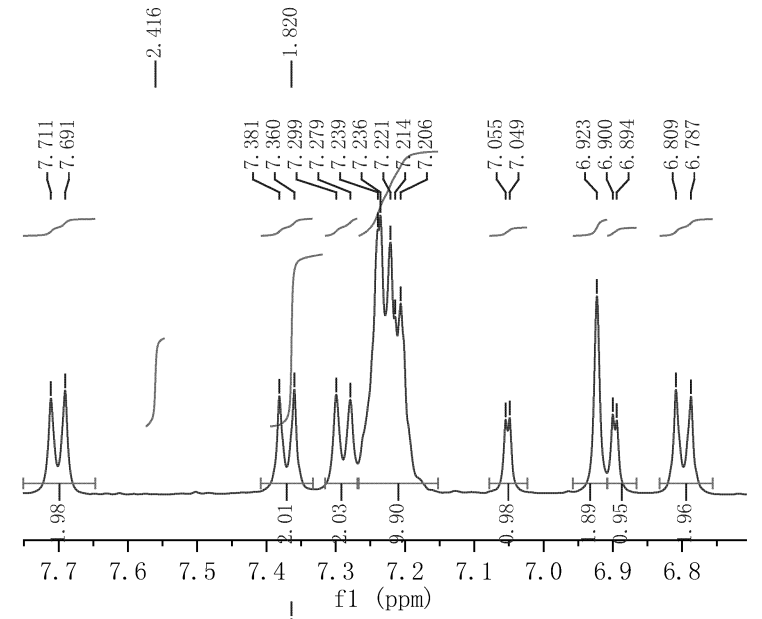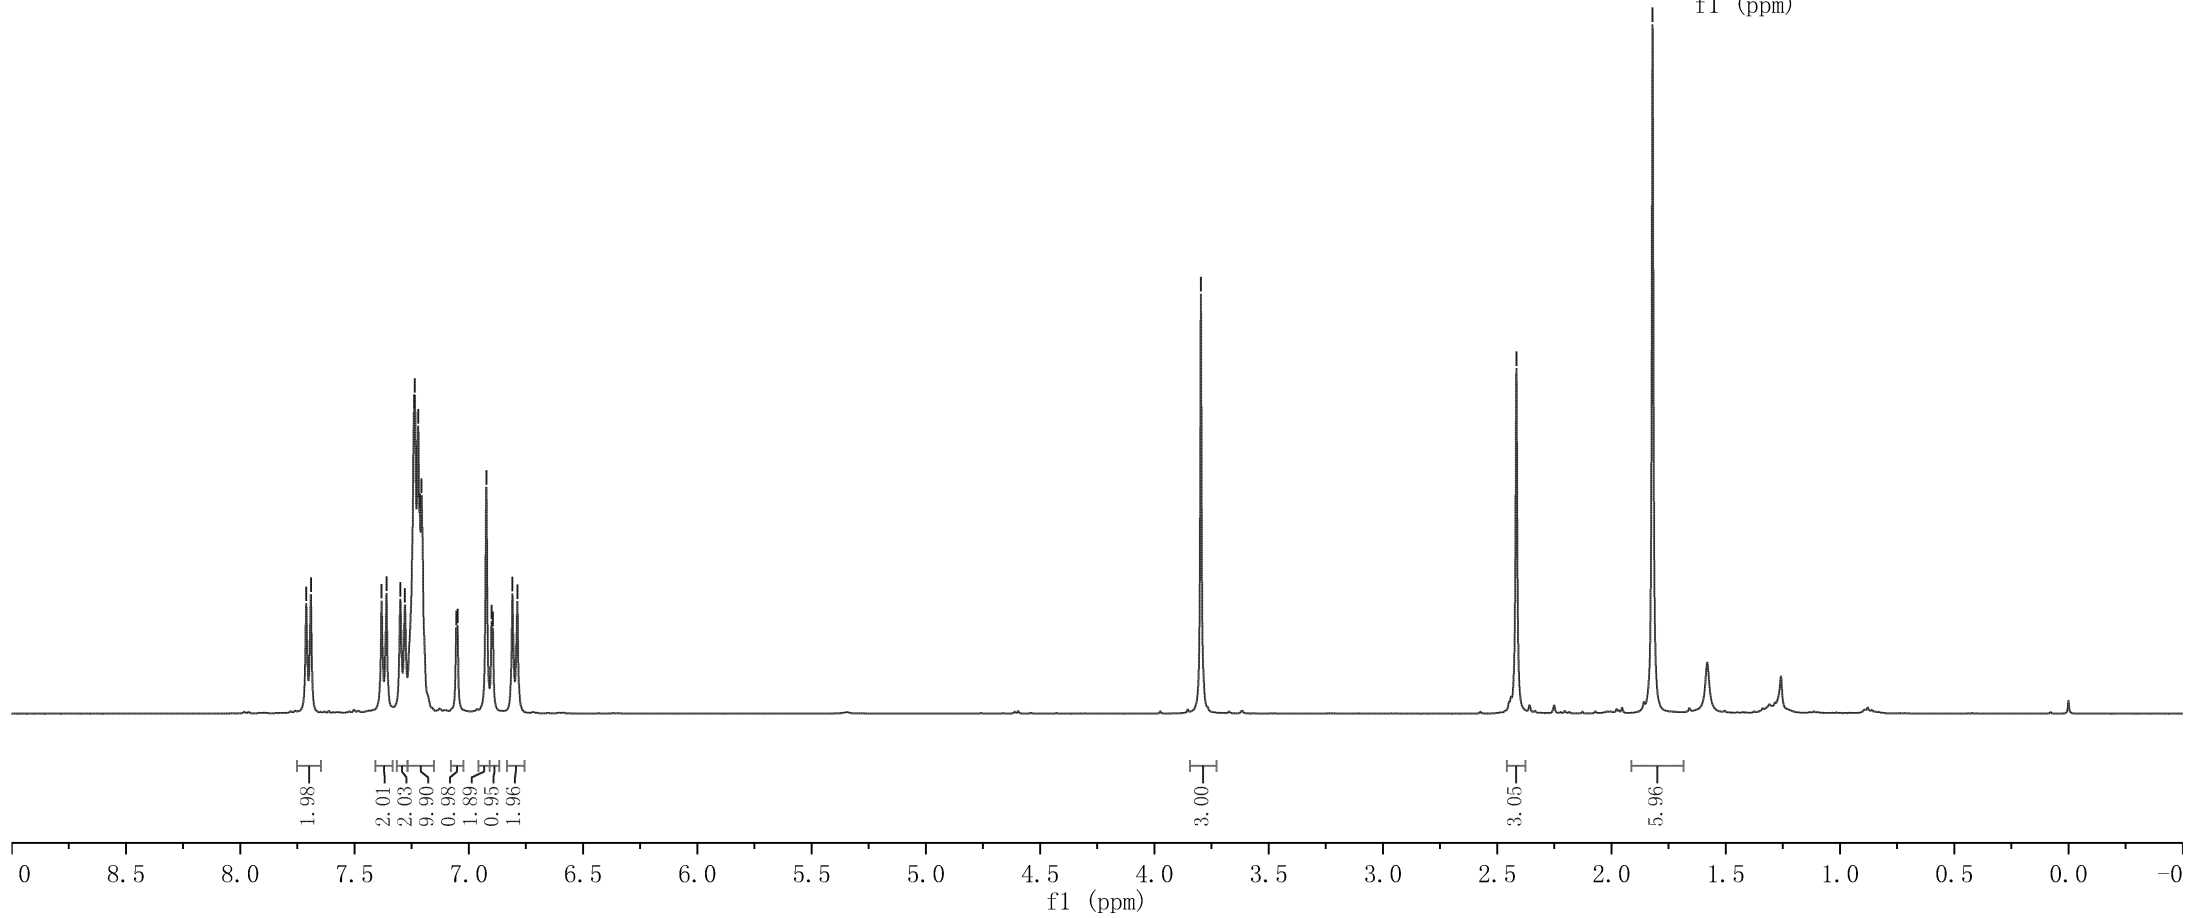

| Parameter                | Value               |
|--------------------------|---------------------|
| 1 Title                  | XHJ-2-220-C-3       |
| 2 Origin                 | Bruker BioSpin GmbH |
| 3 Solvent                | CDC13               |
| 4 Temperature            | 300.0               |
| 5 Number of Scans        | 51                  |
| 6 Acquisition Time       | 1.3631              |
| 7 Acquisition Date       | 2022-08-16T15:51:41 |
| 8 Spectrometer Frequency | 100.61              |
| 9 Spectral Width         | 24038.5             |

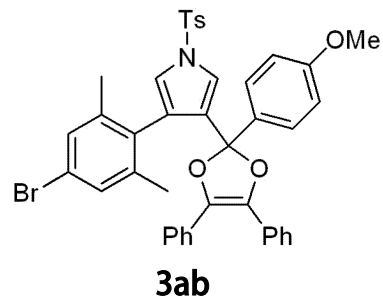

159.85  
145.20  
140.34  
129.99  
129.24  
128.05  
127.80  
127.00  
126.73  
126.49  
121.05  
119.56  
113.12  
108.42

77.32  
77.00  
76.68

55.28

21.62  
20.56

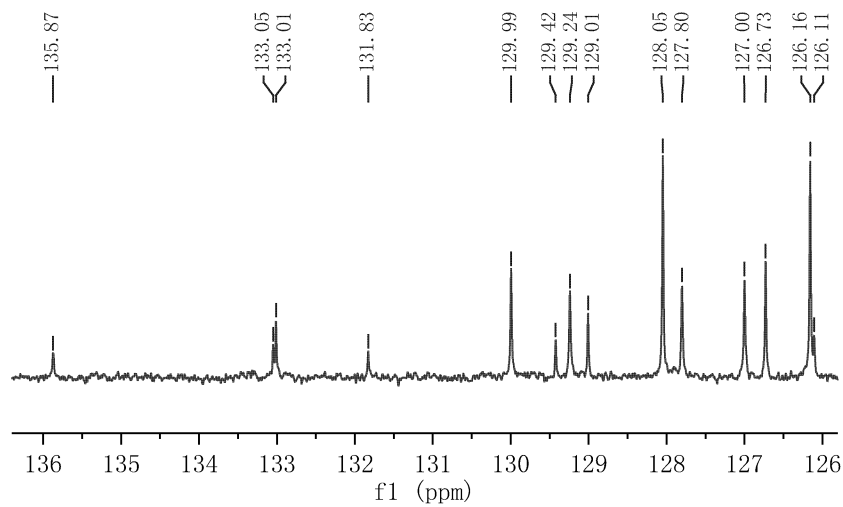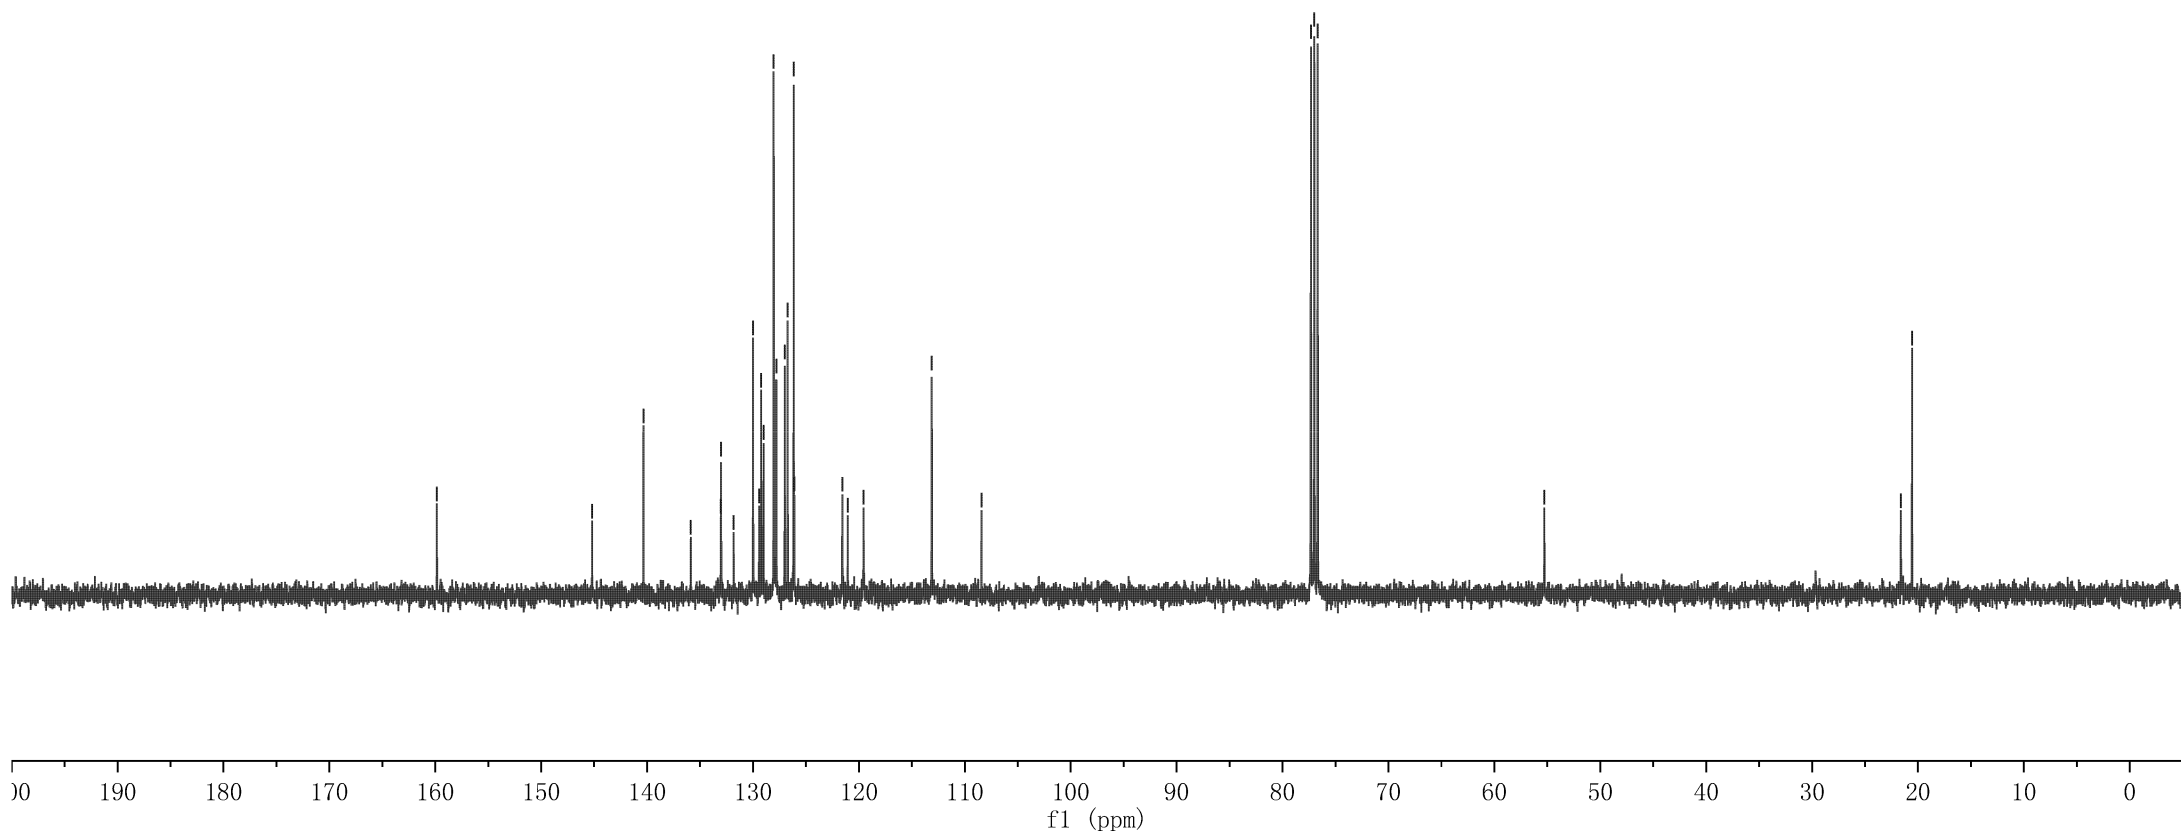

| Parameter                | Value               |
|--------------------------|---------------------|
| 1 Title                  | XHJ-3-132-H-2       |
| 2 Origin                 | Bruker BioSpin GmbH |
| 3 Solvent                | CDCl3               |
| 4 Temperature            | 298.0               |
| 5 Number of Scans        | 6                   |
| 6 Acquisition Time       | 4.0894              |
| 7 Acquisition Date       | 2022-11-02T20:57:18 |
| 8 Spectrometer Frequency | 400.13              |
| 9 Spectral Width         | 8012.8              |

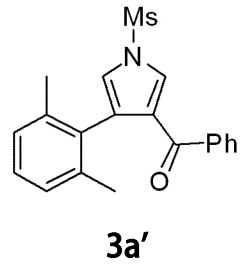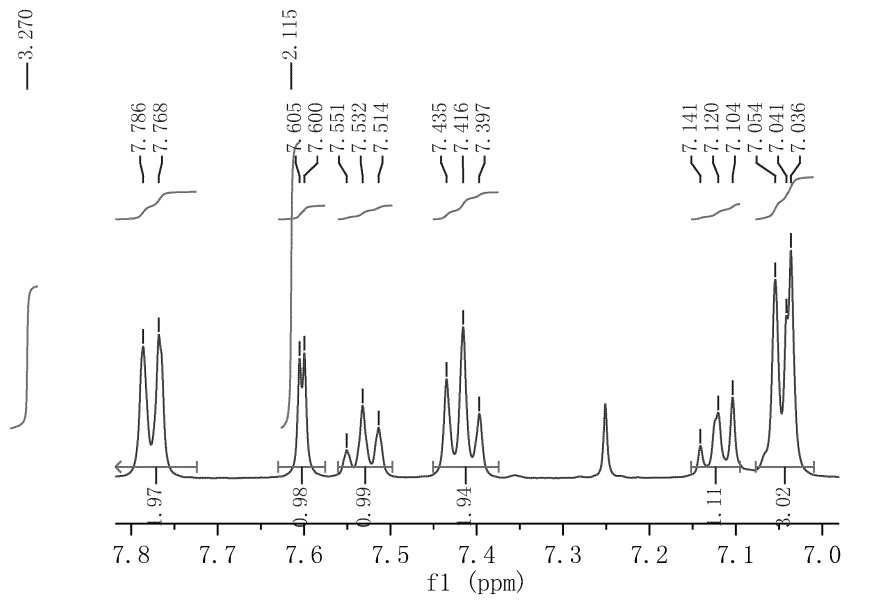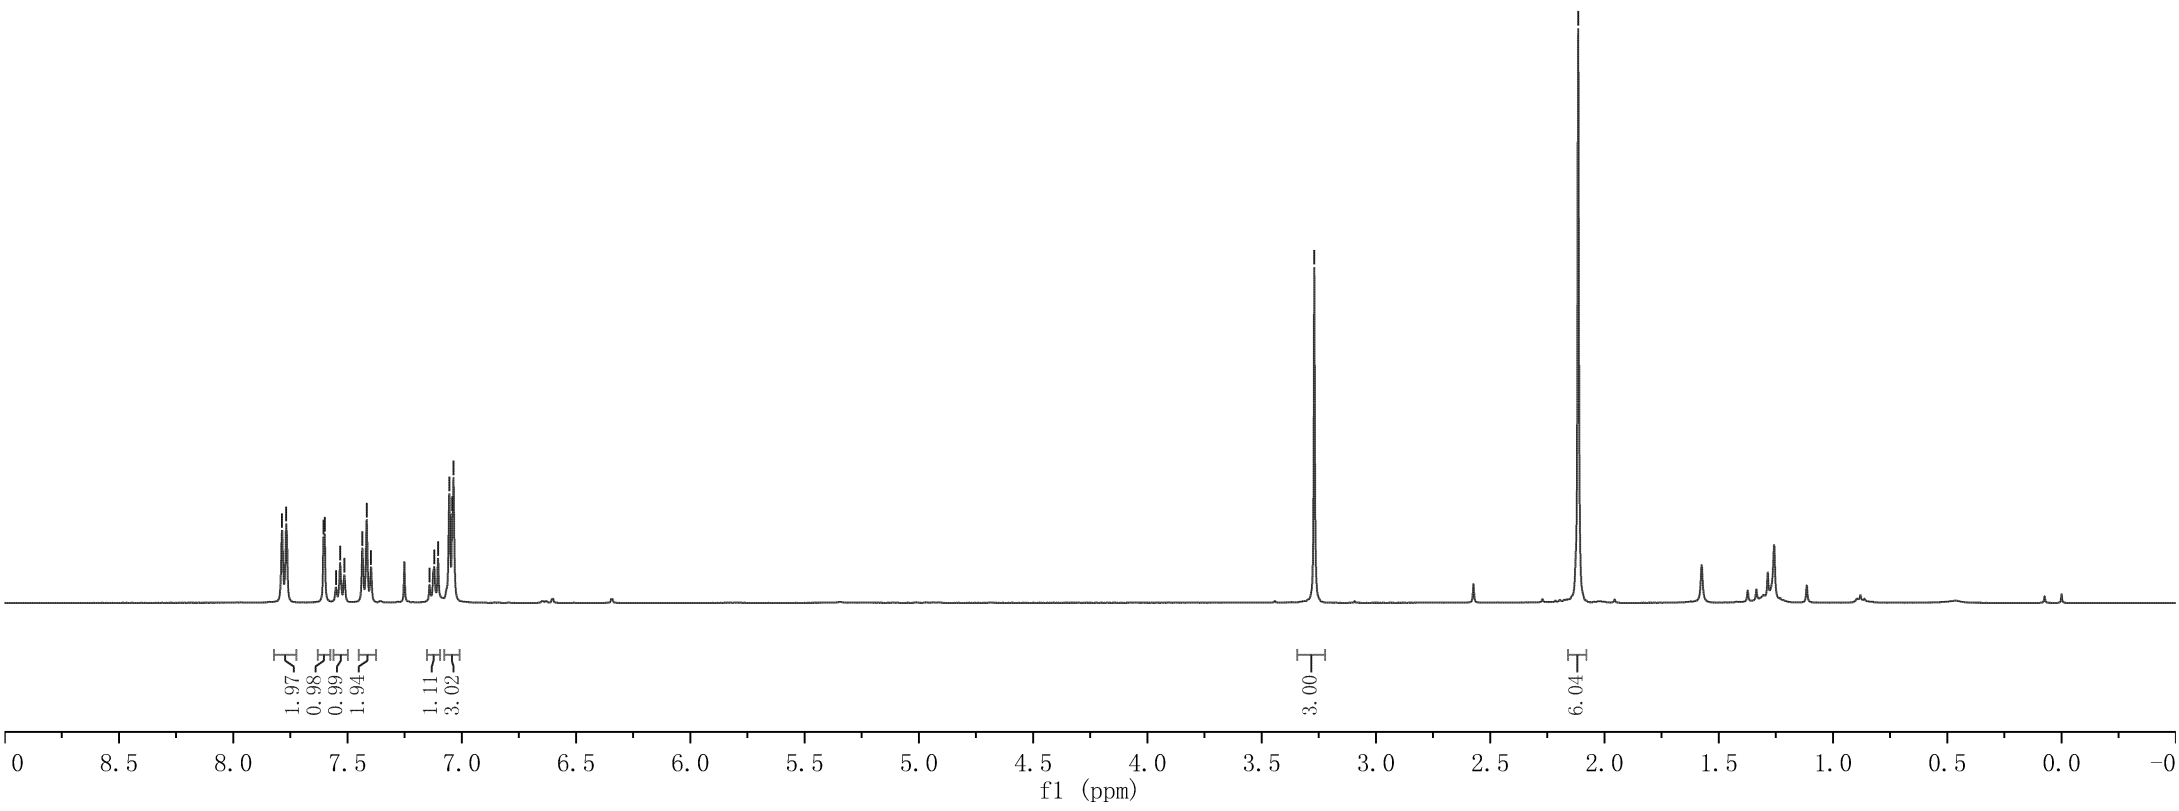



189.65

138.28  
136.96  
132.48  
129.13  
128.36  
128.13  
127.61  
127.08  
119.40

77.32  
77.00  
76.68

43.08

20.94

| Parameter                | Value               |
|--------------------------|---------------------|
| 1 Title                  | XHJ-3-132-C-2       |
| 2 Origin                 | Bruker BioSpin GmbH |
| 3 Solvent                | CDC13               |
| 4 Temperature            | 300.0               |
| 5 Number of Scans        | 52                  |
| 6 Acquisition Time       | 1.3631              |
| 7 Acquisition Date       | 2022-11-02T20:58:31 |
| 8 Spectrometer Frequency | 100.61              |
| 9 Spectral Width         | 24038.5             |

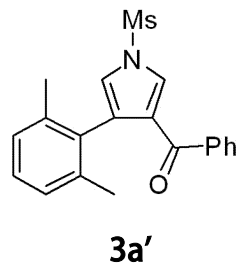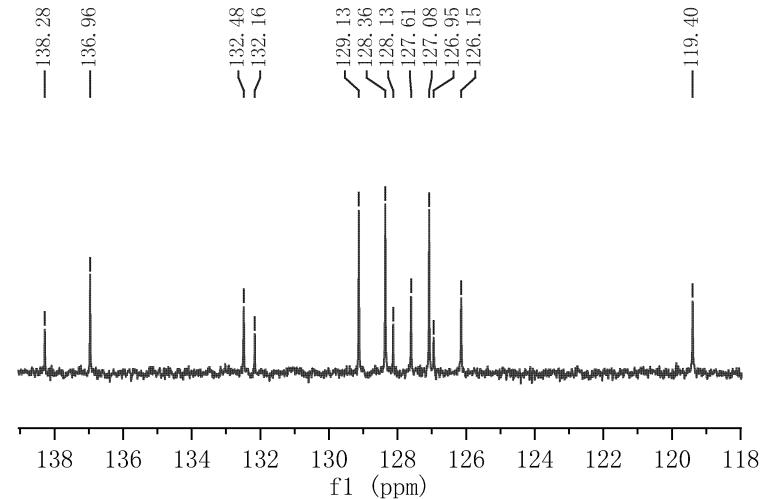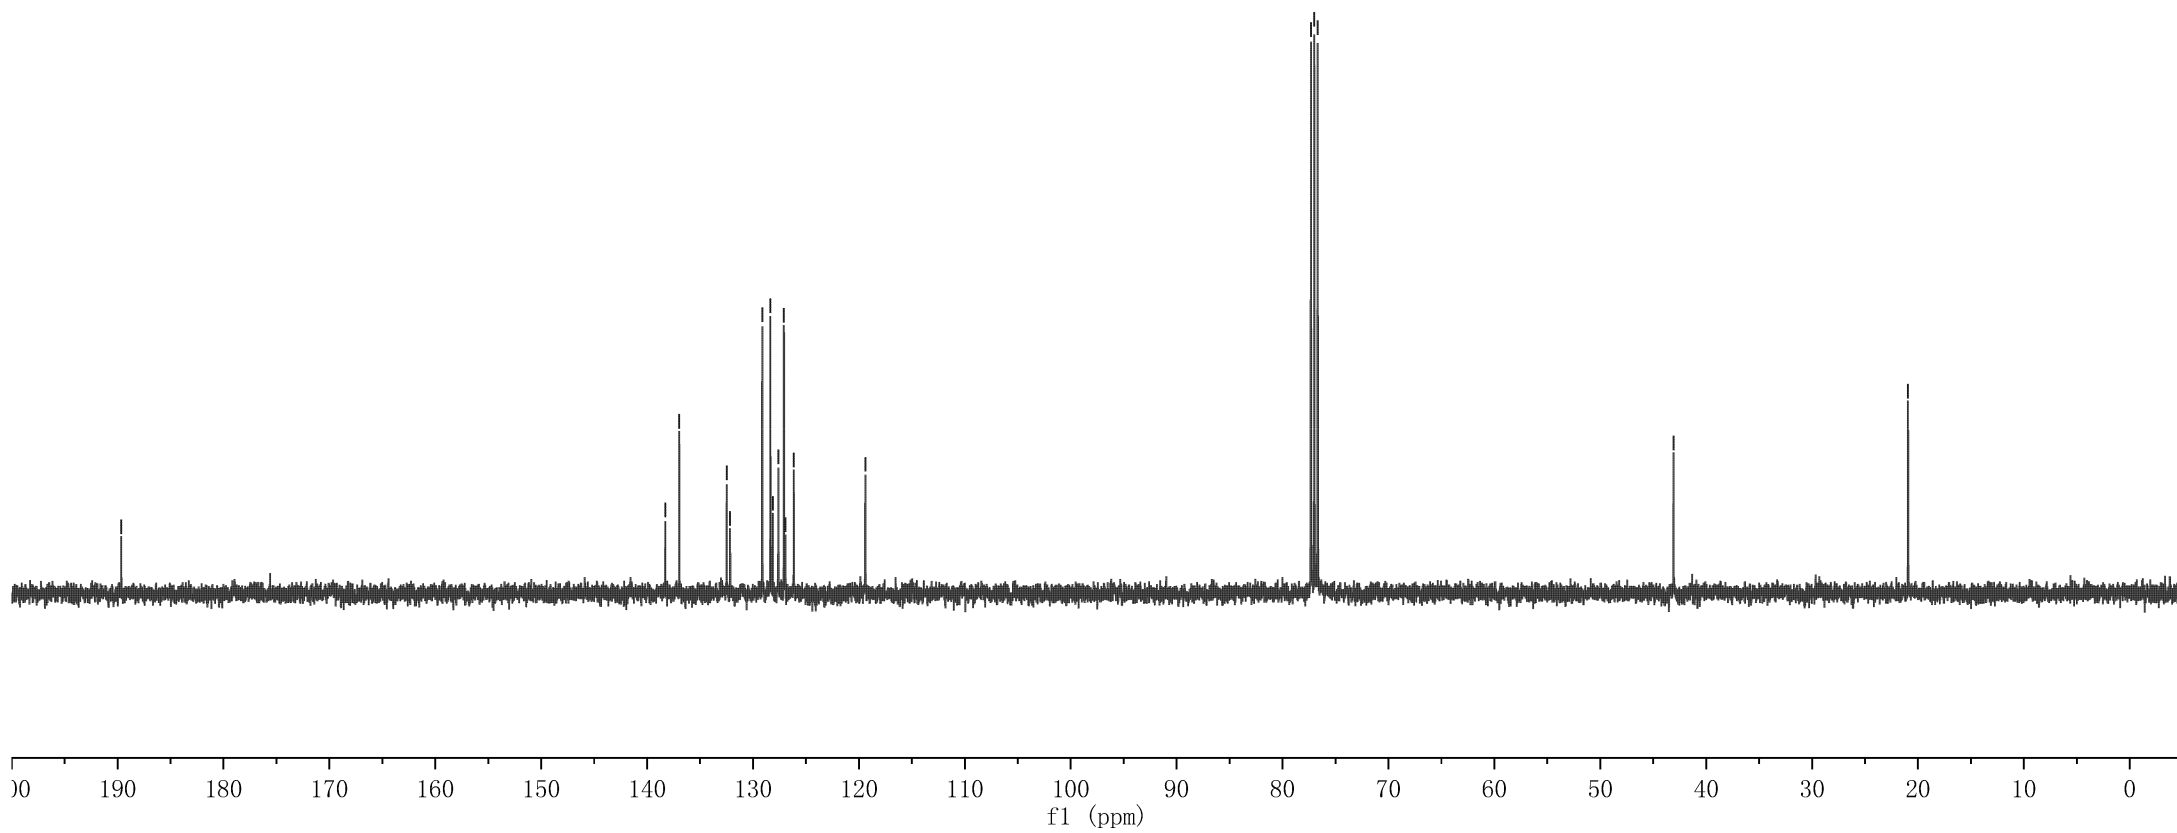

7.492  
7.477  
7.472  
7.302  
7.283  
7.265  
7.243  
7.232  
7.221  
7.214  
7.207  
7.203  
7.073  
7.066  
7.015  
6.996  
6.978  
6.907  
6.900  
6.865  
6.846

| Parameter                | Value               |
|--------------------------|---------------------|
| 1 Title                  | XHJ-3-130-H         |
| 2 Origin                 | Bruker BioSpin GmbH |
| 3 Solvent                | CDC13               |
| 4 Temperature            | 298.0               |
| 5 Number of Scans        | 11                  |
| 6 Acquisition Time       | 4/0894              |
| 7 Acquisition Date       | 2022-11-02T08:01:07 |
| 8 Spectrometer Frequency | 400.13              |
| 9 Spectral Width         | 8012.8              |

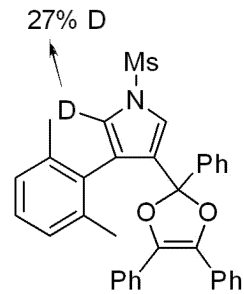

**[D1]-3a**

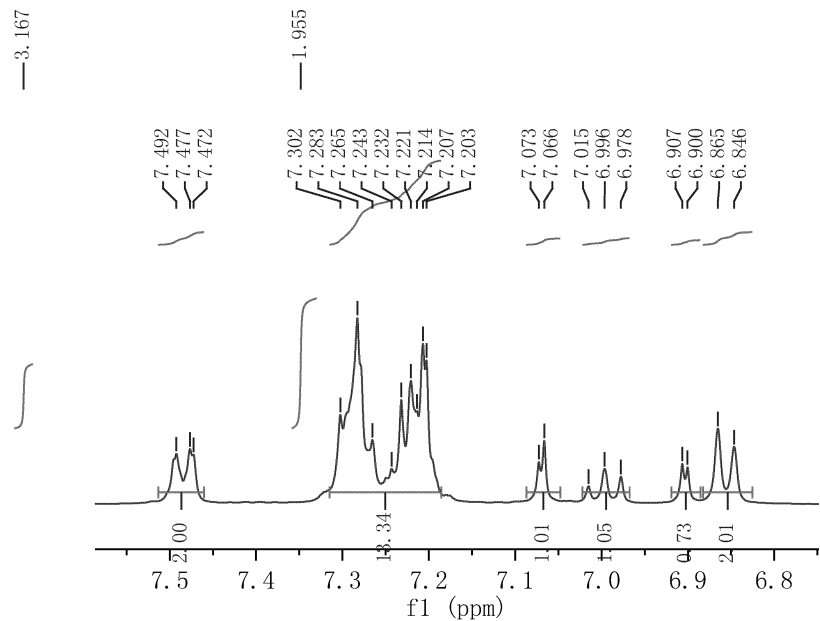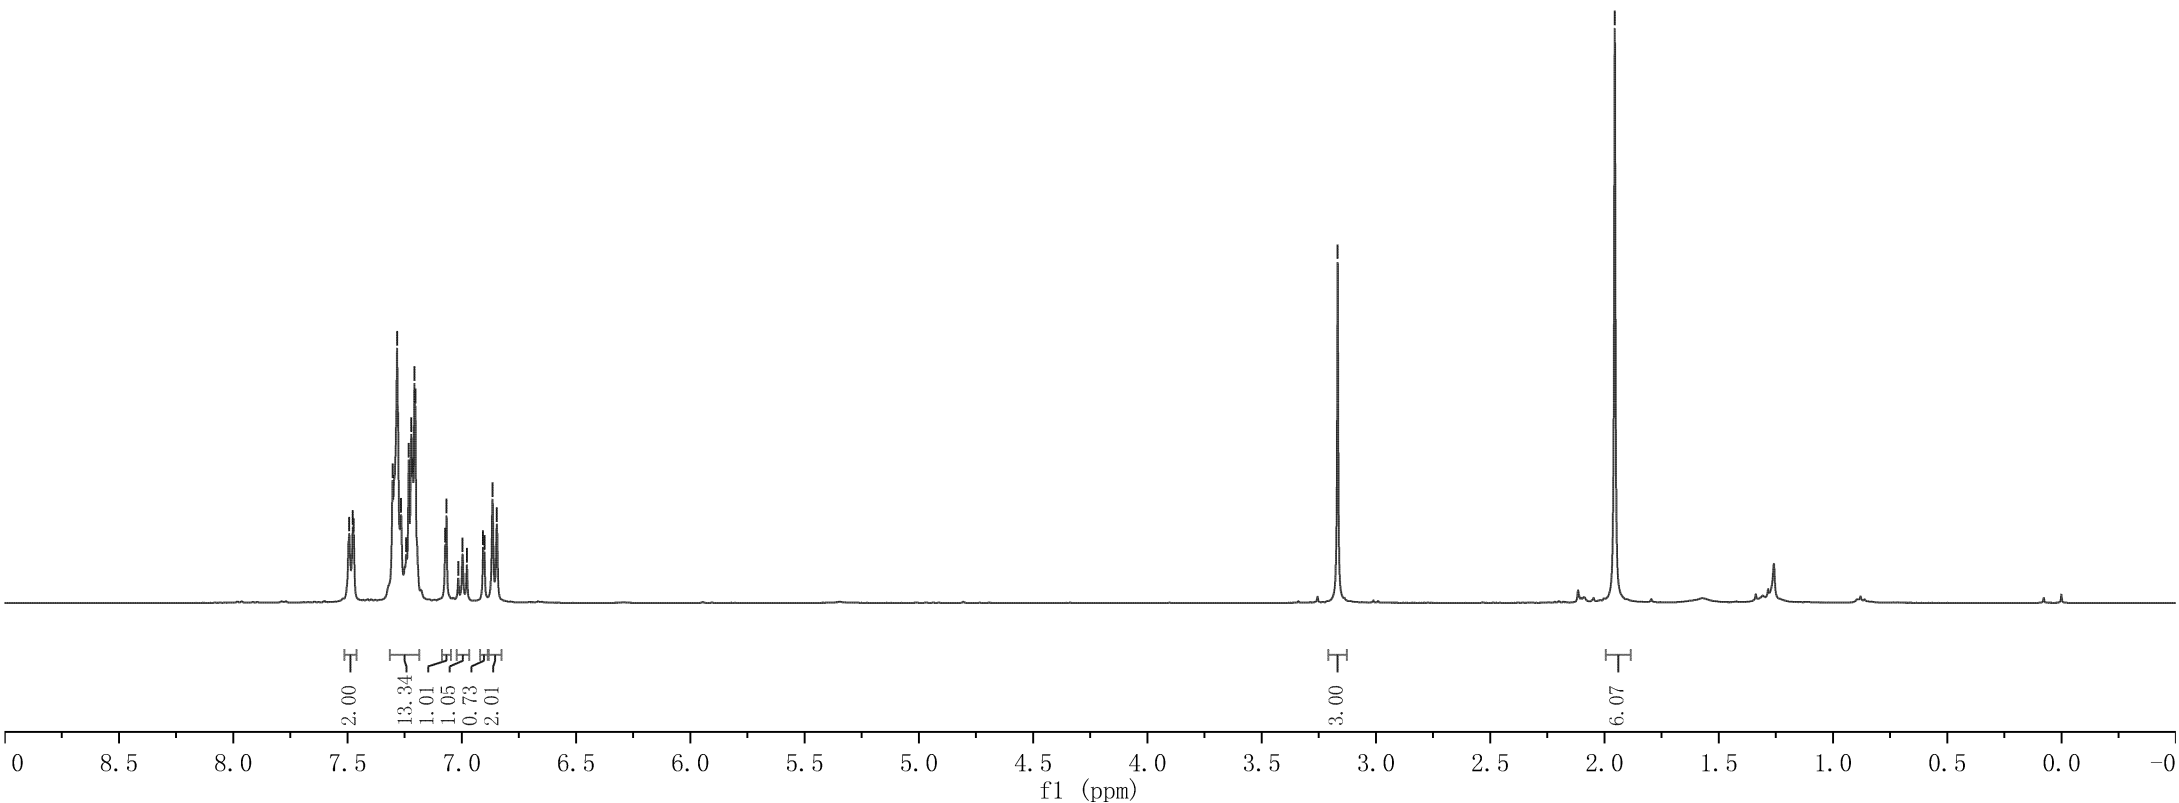

7.492  
7.476  
7.472  
7.302  
7.282  
7.278  
7.266  
7.243  
7.234  
7.221  
7.208  
7.203  
7.015  
6.996  
6.977  
6.900  
6.865  
6.846

| Parameter                | Value               |
|--------------------------|---------------------|
| 1 Title                  | XHJ-3-131-H         |
| 2 Origin                 | Bruker BioSpin GmbH |
| 3 Solvent                | CDC13               |
| 4 Temperature            | 298.0               |
| 5 Number of Scans        | 8                   |
| 6 Acquisition Time       | 4.0894              |
| 7 Acquisition Date       | 2022-11-02T14:22:57 |
| 8 Spectrometer Frequency | 400.13              |
| 9 Spectral Width         | 8012.8              |

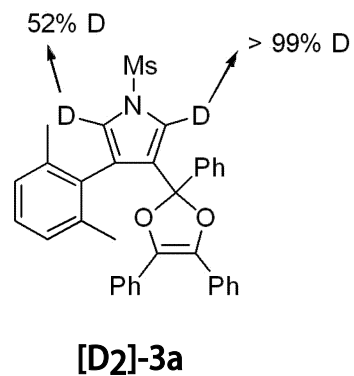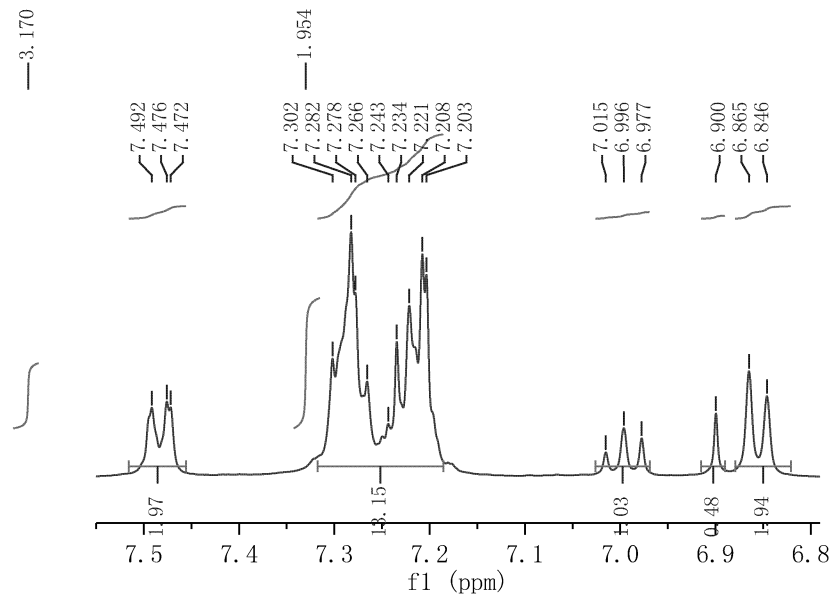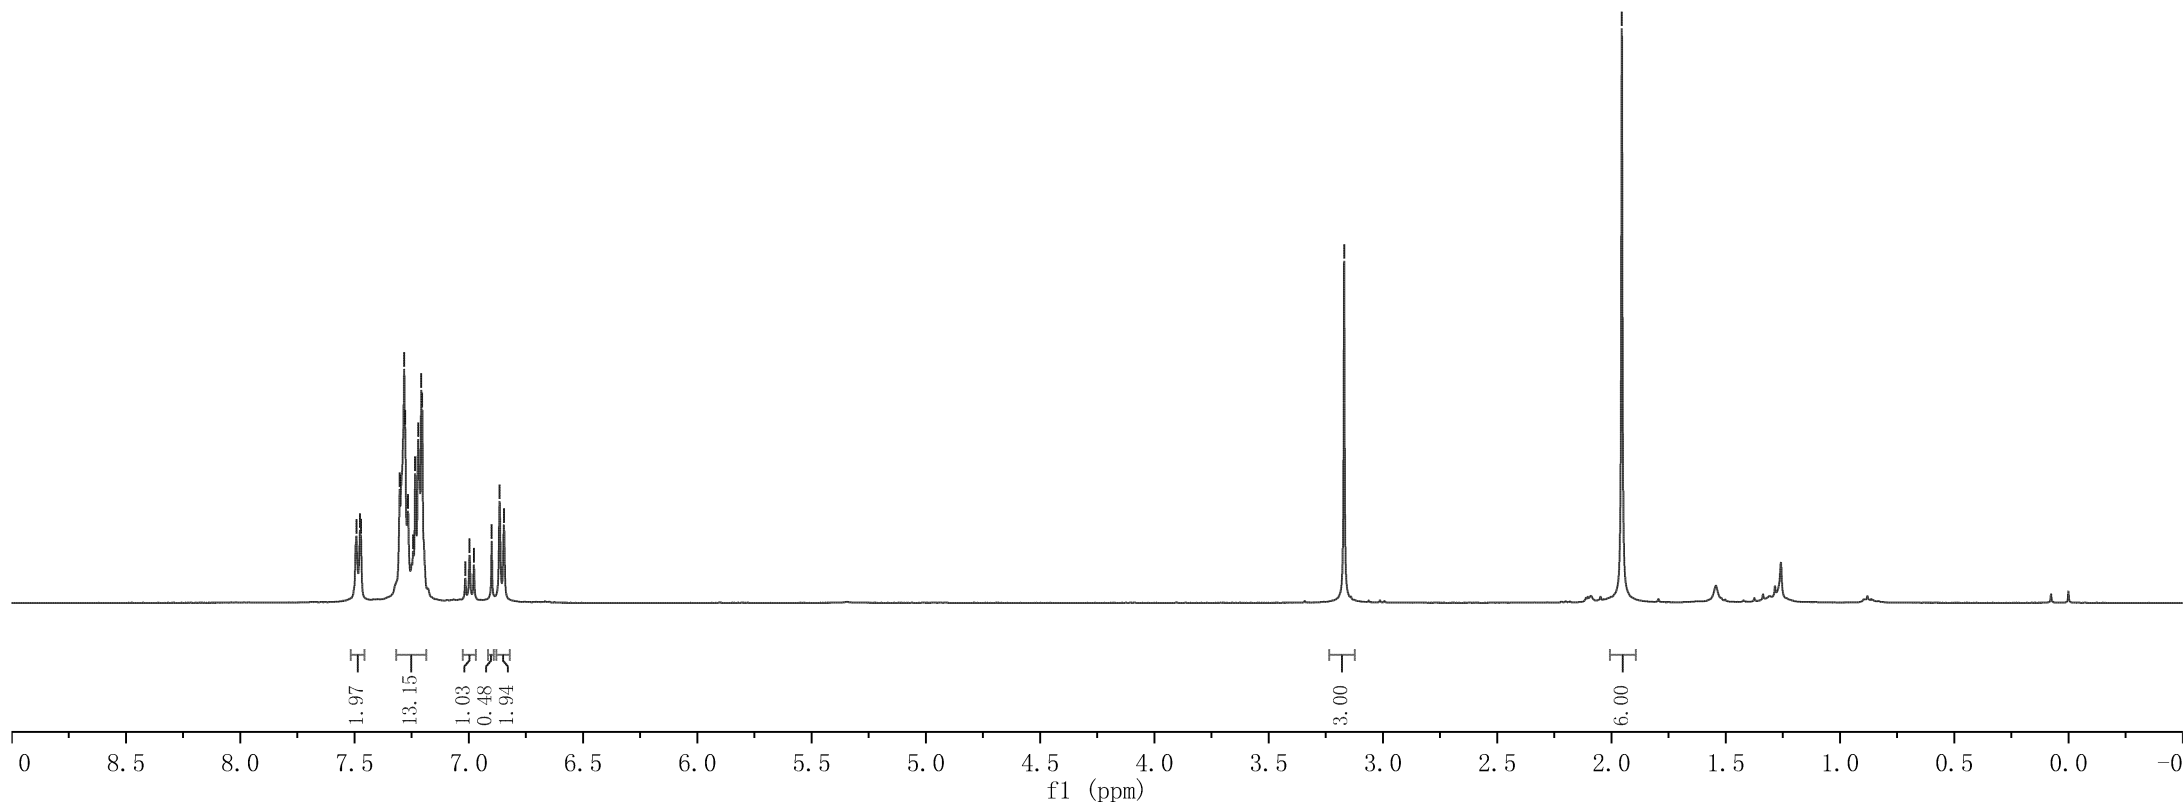

7.492  
7.476  
7.472  
7.301  
7.282  
7.265  
7.242  
7.232  
7.221  
7.215  
7.207  
7.203  
7.015  
6.996  
6.977  
6.899  
6.864  
6.846

| Parameter                | Value               |
|--------------------------|---------------------|
| 1 Title                  | XHJ-3-142-H         |
| 2 Origin                 | Bruker BioSpin GmbH |
| 3 Solvent                | CDC13               |
| 4 Temperature            | 298.0               |
| 5 Number of Scans        | 5                   |
| 6 Acquisition Time       | 4.0894              |
| 7 Acquisition Date       | 2022-11-08T18:16:42 |
| 8 Spectrometer Frequency | 400.13              |
| 9 Spectral Width         | 8012.8              |

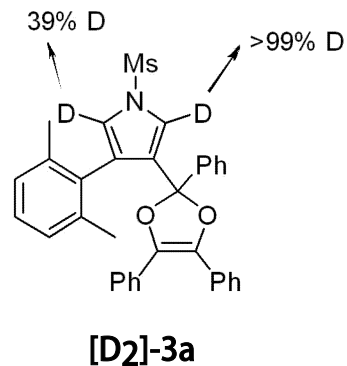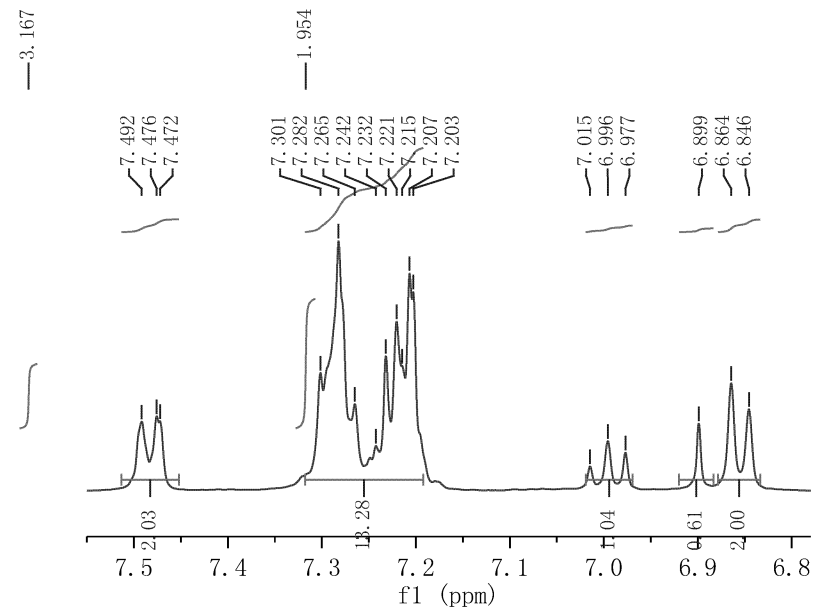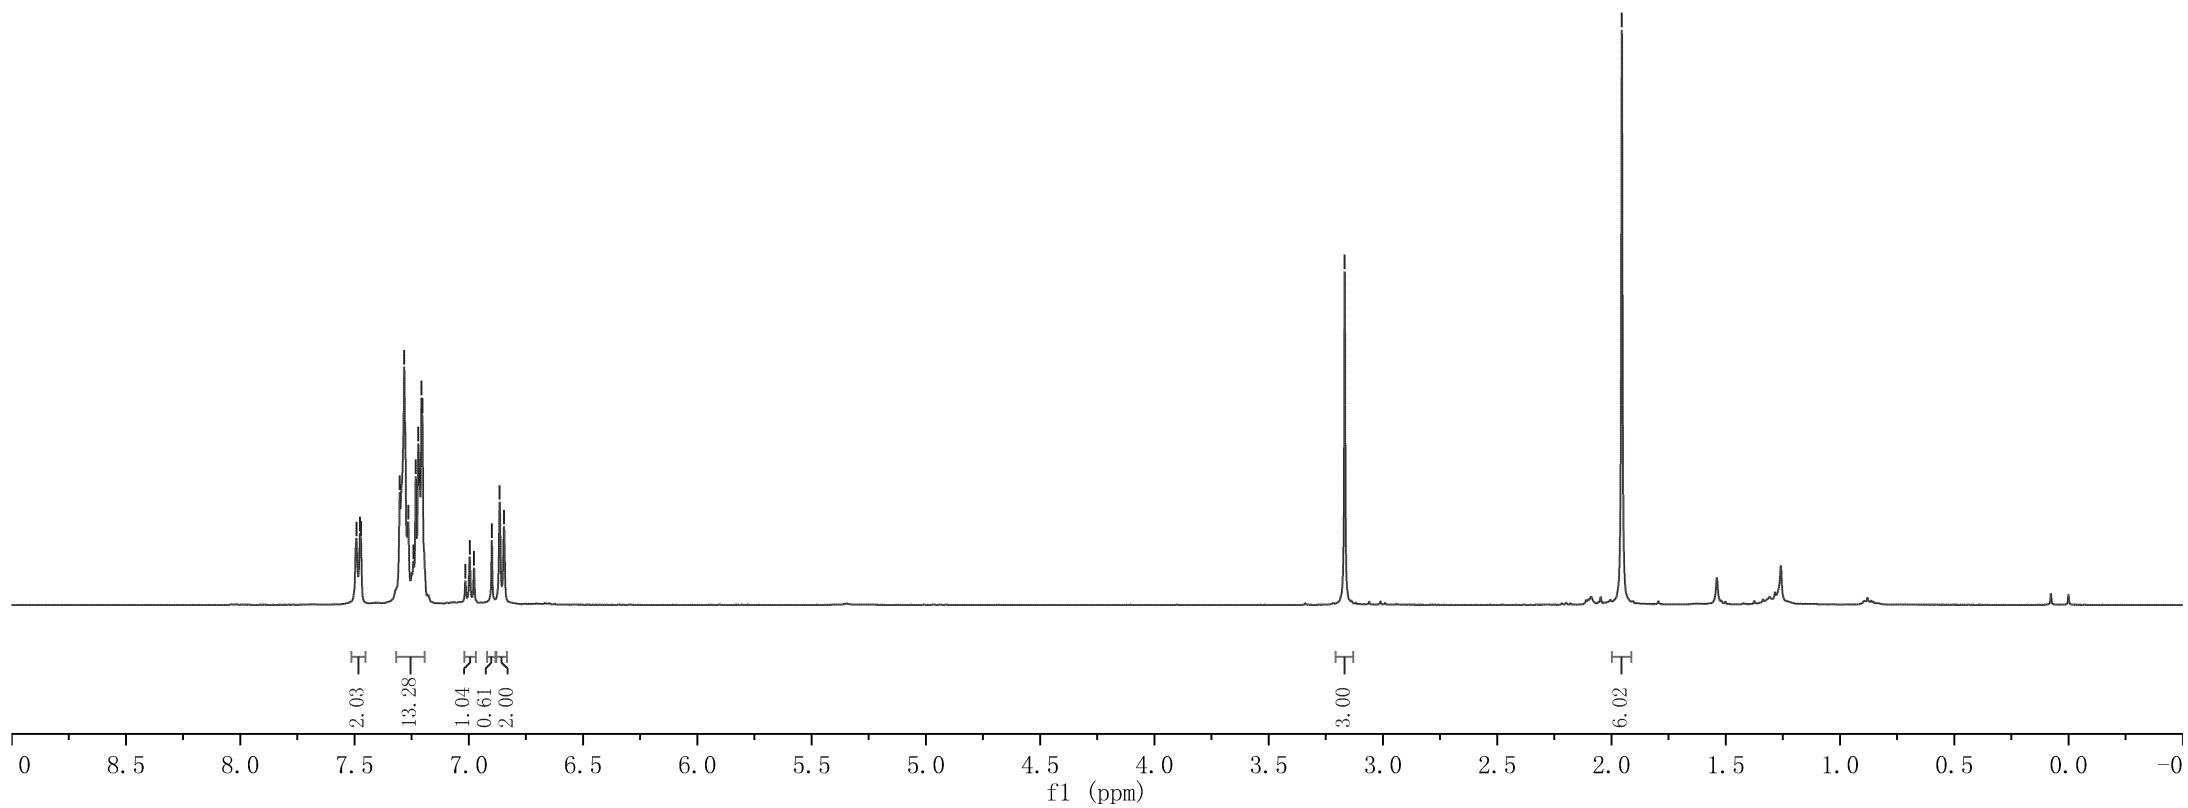

| Parameter                | Value               |
|--------------------------|---------------------|
| 1 Title                  | XHJ-2-79-II         |
| 2 Origin                 | Bruker BioSpin GmbH |
| 3 Solvent                | CDCl3               |
| 4 Temperature            | 298.0               |
| 5 Number of Scans        | 8                   |
| 6 Acquisition Time       | 4.0894              |
| 7 Acquisition Date       | 2022-05-24T15:33:00 |
| 8 Spectrometer Frequency | 400.13              |
| 9 Spectral Width         | 8012.8              |

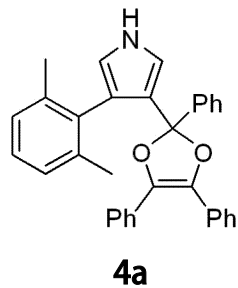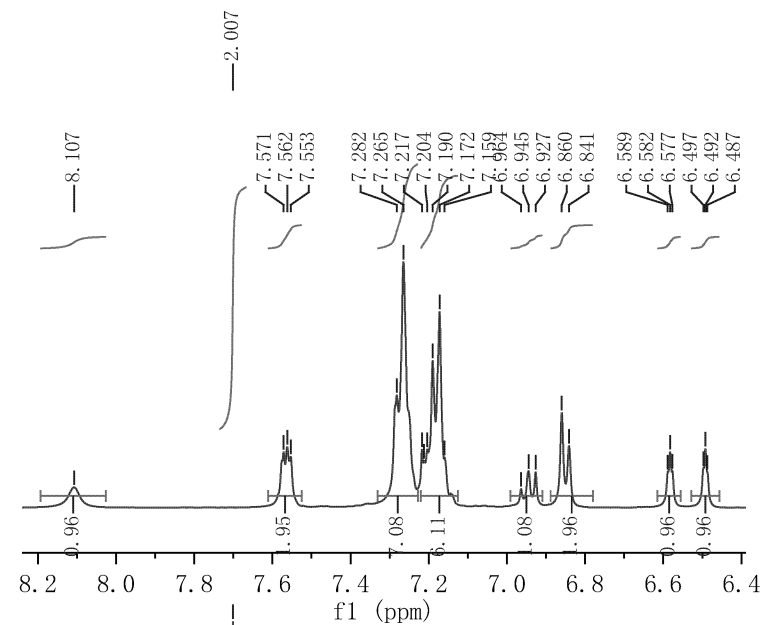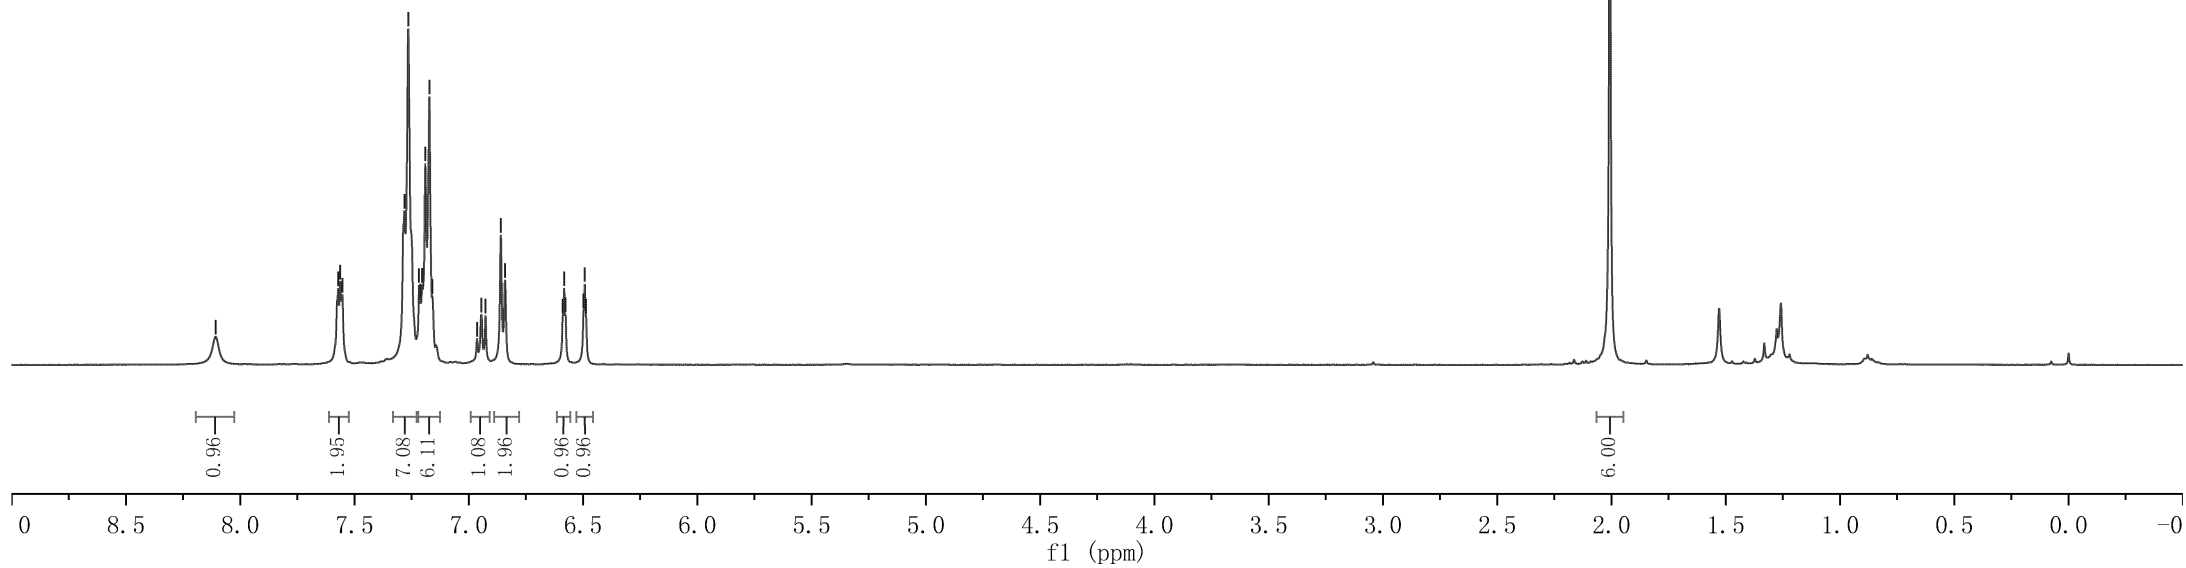

142.72  
138.74  
135.23  
133.10  
129.67  
127.99  
127.88  
127.41  
127.39  
126.49  
126.32  
126.31  
125.82  
123.35  
122.15  
119.07  
116.92  
109.76

77.32  
77.00  
76.68

21.03

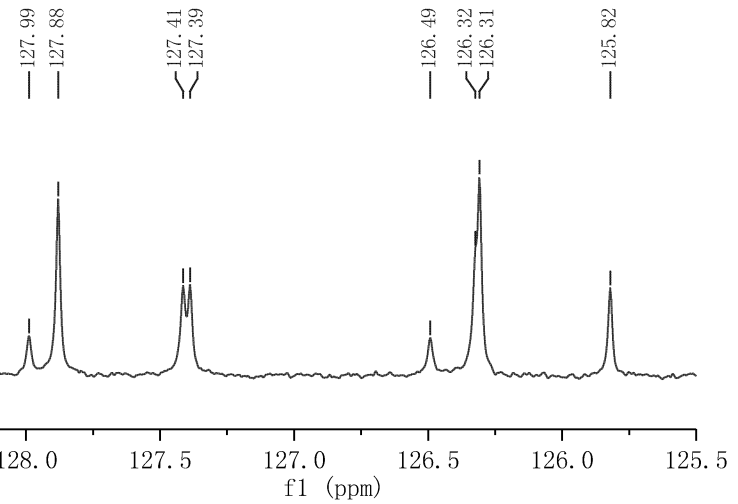

| Parameter                | Value               |
|--------------------------|---------------------|
| 1 Title                  | XHJ-2-79-C          |
| 2 Origin                 | Bruker BioSpin GmbH |
| 3 Solvent                | CDC13               |
| 4 Temperature            | 300.0               |
| 5 Number of Scans        | 44                  |
| 6 Acquisition Time       | 1.3631              |
| 7 Acquisition Date       | 2022-05-24T15:34:47 |
| 8 Spectrometer Frequency | 100.61              |
| 9 Spectral Width         | 24038.5             |

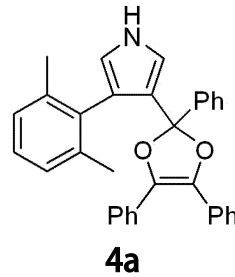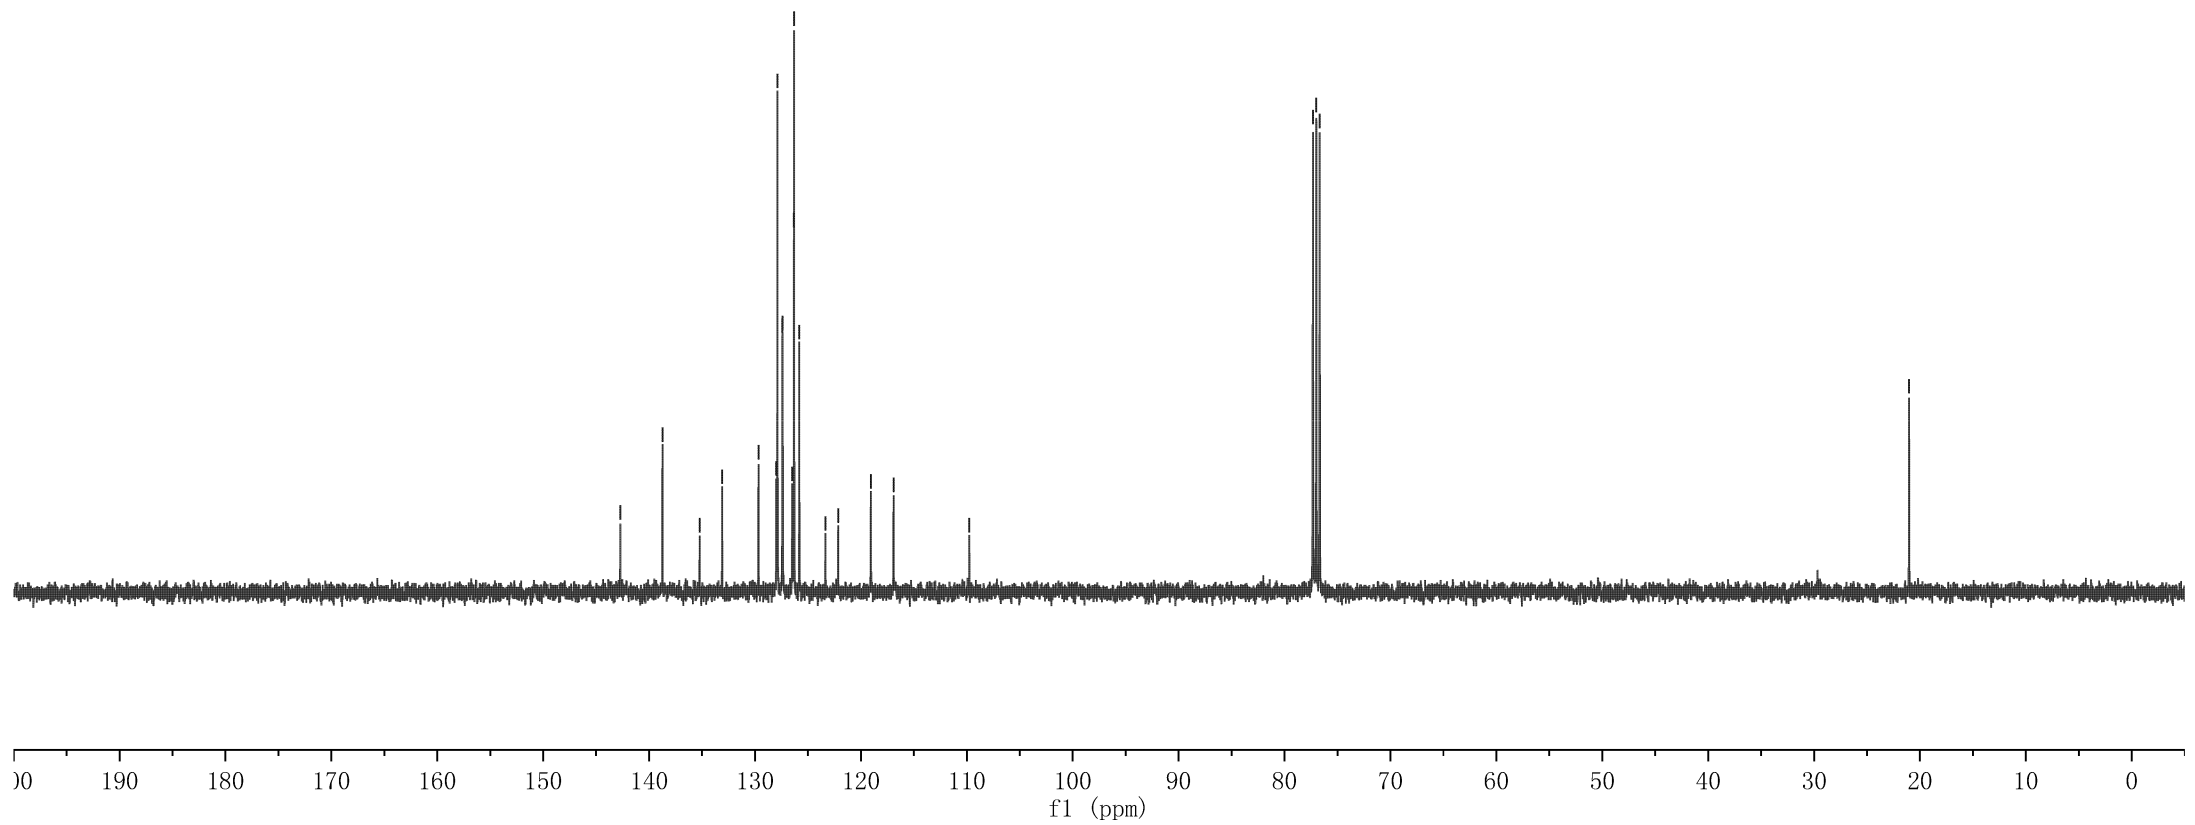

7.504  
7.500  
7.487  
7.480  
7.342  
7.332  
7.323  
7.318  
7.310  
7.291  
7.274  
7.248  
7.238  
7.233  
7.177  
7.047  
7.042  
7.030  
7.025  
7.014  
7.001  
6.983  
6.966  
6.895  
6.877  
6.858  
6.812  
6.793  
6.712  
6.694  
5.658  
5.655

5.251  
5.247

| Parameter                | Value               |
|--------------------------|---------------------|
| 1 Title                  | XHJ-2-78-H          |
| 2 Origin                 | Bfuker BioSpin GmbH |
| 3 Solvent                | CDC13               |
| 4 Temperature            | 298.0               |
| 5 Number of Scans        | 16                  |
| 6 Acquisition Time       | 4.0894              |
| 7 Acquisition Date       | 2022-05-25T15:29:15 |
| 8 Spectrometer Frequency | 400.13              |
| 9 Spectral Width         | 8012.8              |

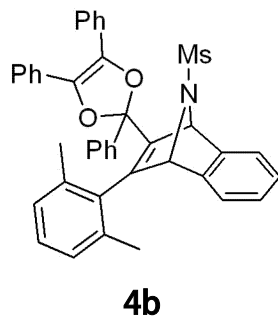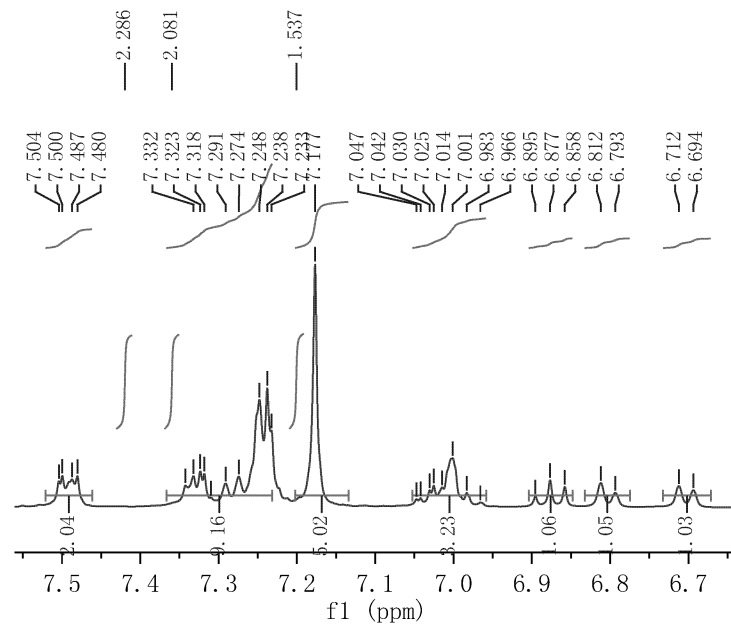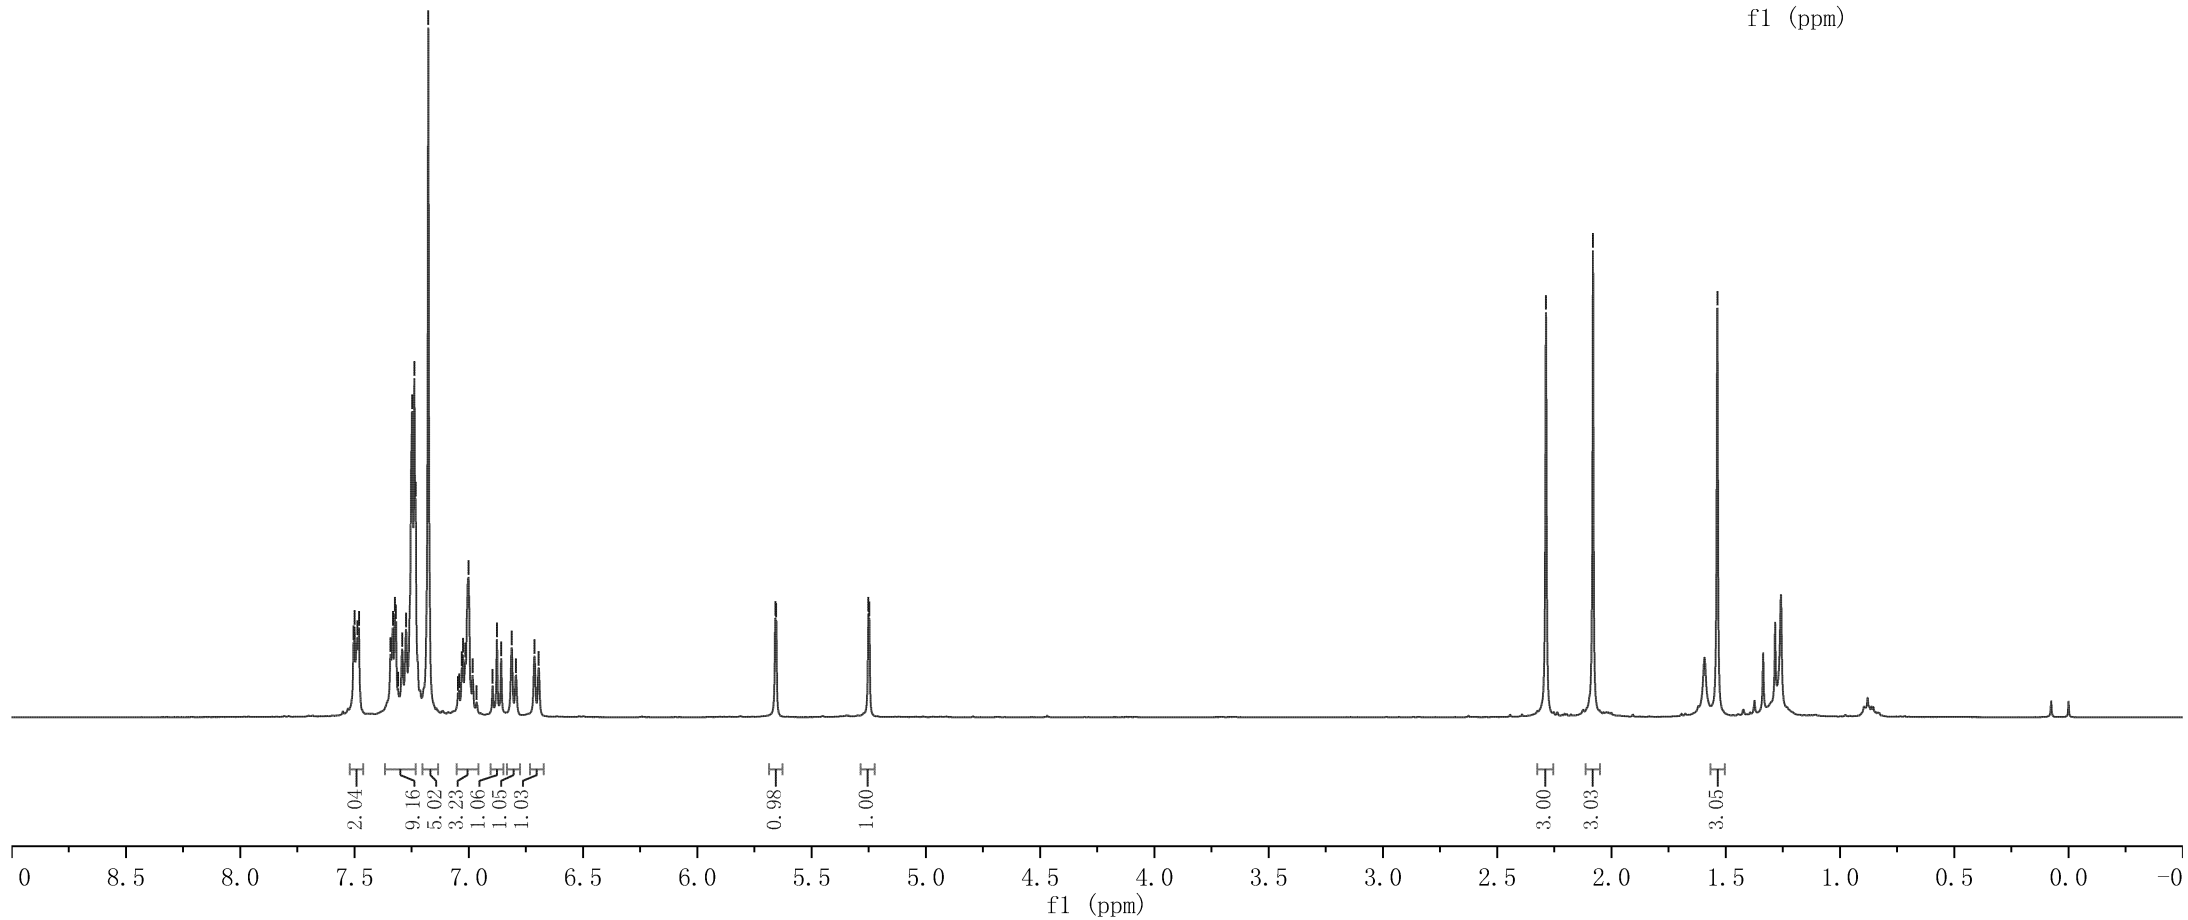

| Parameter                | Value               |
|--------------------------|---------------------|
| 1 Title                  | XHJ-2-78-C          |
| 2 Origin                 | Bruker BioSpin GmbH |
| 3 Solvent                | CDC13               |
| 4 Temperature            | 300.0               |
| 5 Number of Scans        | 44                  |
| 6 Acquisition Time       | 1.3631              |
| 7 Acquisition Date       | 2022-05-25T15:31:10 |
| 8 Spectrometer Frequency | 100.61              |
| 9 Spectral Width         | 24038.5             |

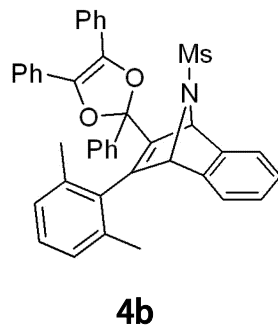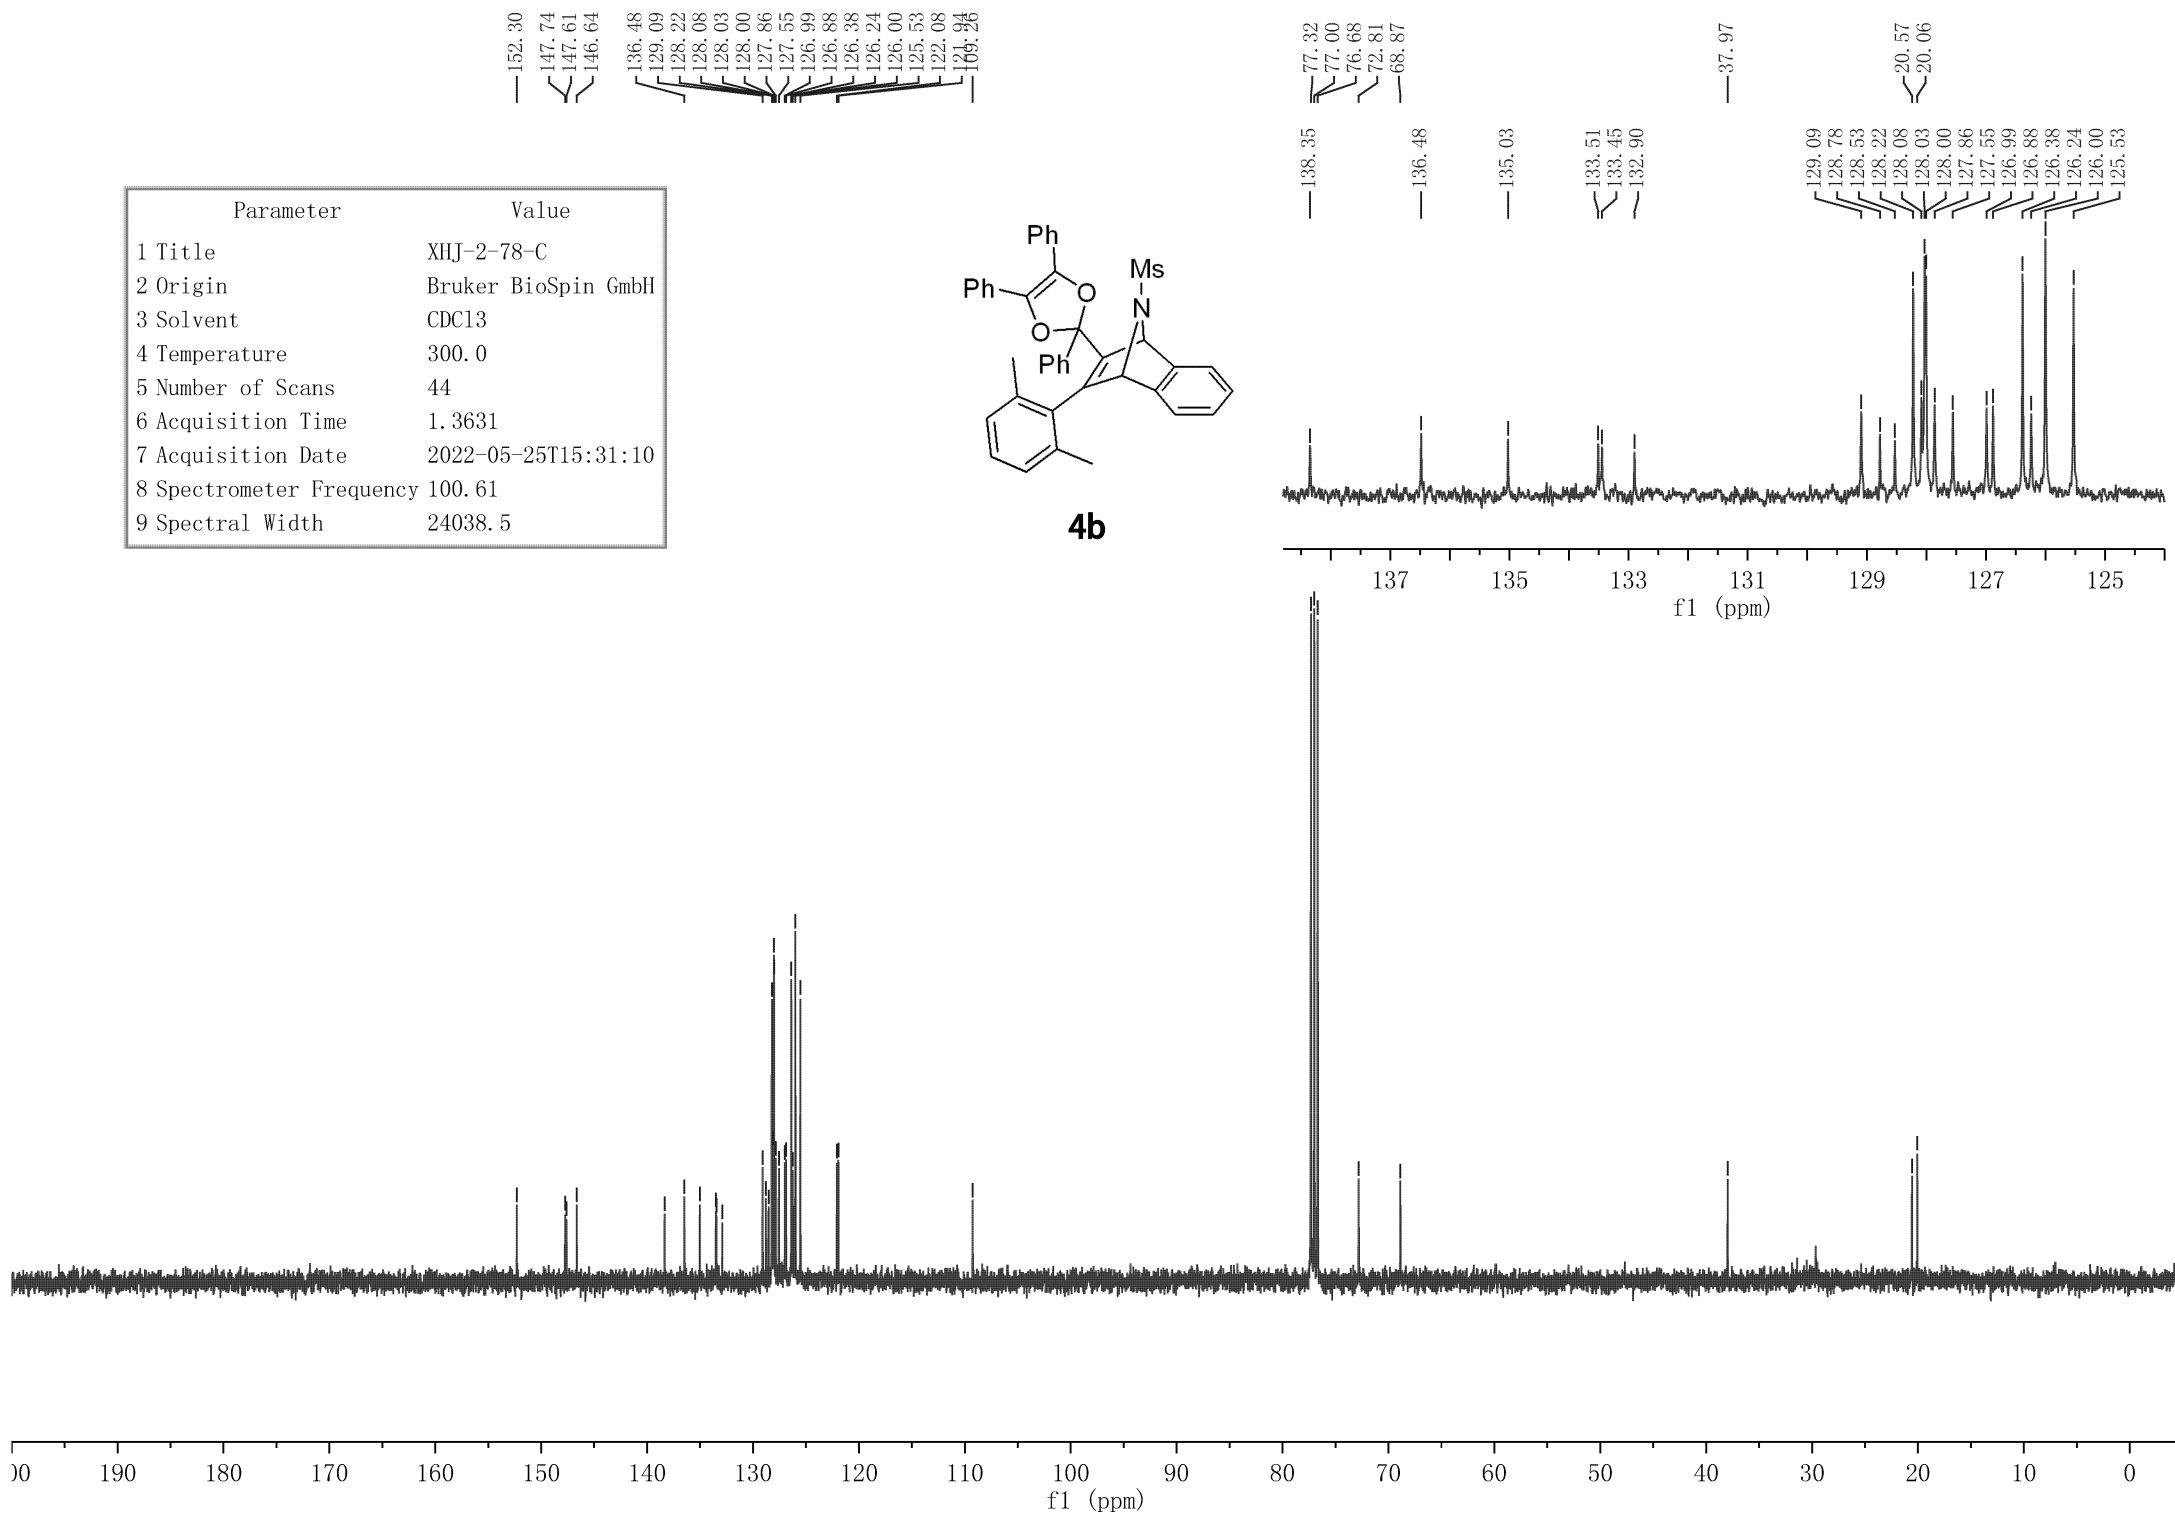

Supplement: d2qo01786e1.pdf [file d2qo01786e1.pdf]
